# Supplementary material for: Microglia facilitate and stabilize the response to general anesthesia via modulating the neuronal network in a brain region-specific manner
Source: eLife. 2023 Dec 22;12:RP92252. doi: 10.7554/eLife.92252 (PMC10746144; doi:10.7554/eLife.92252)
Supplement: Figure 1—source data 1. [file elife-92252-fig1-data1.xlsx]

## Sheet: Figure 1B
	Pentobarbital sodium LORR					Propofol LORR					Chloral Hydrate LORR					Ketamine LORR
	D0	D14	D35	Statistical test		D0	D14	D35	Statistical test		D0	D14	D35	Statistical test		D0	D14	D35	Statistical test
	125	130	110	(paired) One-Way ANOVA		90	112	110	(paired) One-Way ANOVA		105	125	150	(paired) One-Way ANOVA		90	85	110	(paired) One-Way ANOVA
	121	135	110			85	114	97			190	240	140			145	150	170
	124	170	115			85	88	87			100	115	136			105	105	110
	122	220	115			75	110	106			105	113	200			60	100	100
	116	300	140			80	110	100			124	145	146			80	100	118
	119	143	135			80	248	104			140	160	110			90	110	155
	119	126	115			88	135	110			146	174	105			150	138	110
	118	153	148			95	110	98			145	175	150			80	200	270
	110	122	110			92	200	97			143	180	118			148	190	135
	95	165	122			87	140	100			144	180	150			122	175	300
	97	120	105													118	118	150
																140	191	die
	Pentobarbital sodium RORR					Propofol RORR					Chloral Hydrate RORR					Ketamine RORR
	D0	D14	D35	Statistical test		D0	D14	D35	Statistical test		D0	D14	D35	Statistical test		D0	D14	D35	Statistical test
	86	70	114	(paired) One-Way ANOVA		65	35	78	(paired) One-Way ANOVA		90	112	110	(paired) One-Way ANOVA		41	37	48	(paired) One-Way ANOVA
	101	79	111			65	32	97			85	114	97			20	23	29
	79	64	110			34	60	107			85	88	87			18	14	33
	96	60	110			70	54	70			75	110	106			33	27	56
	105	50	99			61	31	87			80	110	100			35	15	53
	134	53	92			72	45	63			80	248	104			26	19	34
	134	62	98			59	46				88	135	110			20	18	28
	104	72	107			70	43	75			95	110	98			22	16	27
	107	68	142			73	8	72			92	200	97			20	8	17
	109	59	135			66	38	66			87	140	100			23	10	13
	97	90	47													12	9	14
																18	13	die
