# Supplementary material for: Microglia facilitate and stabilize the response to general anesthesia via modulating the neuronal network in a brain region-specific manner
Source: eLife. 2023 Dec 22;12:RP92252. doi: 10.7554/eLife.92252 (PMC10746144; doi:10.7554/eLife.92252)
Supplement: Figure 2—source data 1. [file elife-92252-fig2-data1.xlsx]

## Sheet: Figure 2B
	Pentobatbital LORR							Propofol LORR							Chloral Hydrate LORR							Ketamine LORR
	D0	D7	D14	D21	D28	Statistical test		D0	D7	D14	D21	D28	Statistical test		D0	D7	D14	D21	D28	Statistical test		D0	D7	D14	D21	D28	Statistical test
	125	108	122	128	110	(paired) One-Way ANOVA		102	86	103	88	101	(paired) One-Way ANOVA		150	170	105	120	135	(paired) One-Way ANOVA		135	128	93	130	125	(paired) One-Way ANOVA
	112	120	114	122	125			106	90	103	110	108			170	140	100	122	150			150	100	108	106	109
	122	116	125	125	118			98	110	90	85	92			190	170	120	118	122			120	136	103	100	118
	110	125	118	122	130			87	87	95	85	90			182	140	140	143	138			140	120	105	115	118
	110	95	110	128	110			90	90	110	108	110			210	160	130	128	138			104	115	118	100	117
	112	110	120	100	die			108	88	110	98	107			185	145	100	125	122
								100	90	110	92	94
	Pentobatbital RORR							Propofol RORR							Chloral Hydrate RORR							Ketamine RORR
	D0	D7	D14	D21	D28	Statistical test		D0	D7	D14	D21	D28	Statistical test		D0	D7	D14	D21	D28	Statistical test		D0	D7	D14	D21	D28	Statistical test
	140	120	140	138	145	(paired) One-Way ANOVA		50	75	145	80	78	(paired) One-Way ANOVA		51	48	35	32	34	(paired) One-Way ANOVA		17	23	31	10	22	(paired) One-Way ANOVA
	139	120	150	137	148			93	69	56	60	70			47	40	36	40	42			23	25	17	15	24
	100	151	102	113	99			131	80	105	100	107			39	36	24	38	28			37	28	18	21	20
	133	145	130	148	145			124	54	128	128	130			38	40	31	28	58			27	22	19	20	die
	115	138	152	134	137			102	107	90	120	110			42	30	25	31	37			17	28	35	42	30
	107	145	133	119	die			93	88	66	100	90			41	37	46	45	60
								137	160	115	190	158
