# Supplementary material for: Microglia facilitate and stabilize the response to general anesthesia via modulating the neuronal network in a brain region-specific manner
Source: eLife. 2023 Dec 22;12:RP92252. doi: 10.7554/eLife.92252 (PMC10746144; doi:10.7554/eLife.92252)
Supplement: Figure 3—source data 1. [file elife-92252-fig3-data1.xlsx]

## Sheet: Figure 3B
	Brain				Liver				Lung				Spleen				Kidney
	D0	D14	Statistical test		D0	D14	Statistical test		D0	D14	Statistical test		D0	D14	Statistical test		D0	D14	Statistical test
	465.752	594.577	Unpaired t test		1159.43	257.65	Unpaired t test		198.19	84.23	Unpaired t test		2100.84	961.234	Unpaired t test		472.997	55.6467	Unpaired t test
	594.577	614.397			1169.34	317.11			277.47	100.726			2556.68	852.228			336.663	50.0821
	584.668	634.216			723.4	376.57			208.1	39.64			2437.77	1090.06			447.956	83.4701
	634.216	545.029			842.32	475.66			287.38	79.28			1902.65	1109.88			581.509	5.56468
