# Supplementary material for: Microglia facilitate and stabilize the response to general anesthesia via modulating the neuronal network in a brain region-specific manner
Source: eLife. 2023 Dec 22;12:RP92252. doi: 10.7554/eLife.92252 (PMC10746144; doi:10.7554/eLife.92252)
Supplement: Figure 3—source data 2. [file elife-92252-fig3-data2.xlsx]

## Sheet: Figure 3C
	Pentobarbital LORR				Propofol LORR				Chloral Hydrate LORR				Ketamine LORR
	D0	D14	Statistical test		D0	D14	Statistical test		D0	D14	Statistical test		D0	D14	Statistical test
	98	115	paired t test		125	130	paired t test		145	167	paired t test		90	140	paired t test
	100	105			98	113			158	140			185	106
	122	102			110	110			170	170			132	200
	153	132			112	110			147	138			185	150
	122	100			115	128			135	138			120	125
	150	113			125	130			155	190			150	135
	118	118			130	110			180	170			100	70
	128	102			110	120			176	190			90	120
	122	122											85	105
	Pentobarbital RORR				Propofol RORR				Chloral Hydrate RORR				Ketamine RORR
	D0	D14	Statistical test		D0	D14	Statistical test		D0	D14	Statistical test		D0	D14	Statistical test
	131	190	paired t test		67	67	paired t test		62	55	paired t test		26	42	paired t test
	135	240			67	72			73	95			33	38
	154	230			60	54			63	85			35	27
	110	192			60	60			43	35			18	23
	86	132			80	99			50	80			36	35
	101	120			60	81			57	31			27	24
	79	82			62	93			69	80			20	35
	140	170			58	64			48	58			26	28
	74	83											26	42
