# Supplementary material for: Microglia facilitate and stabilize the response to general anesthesia via modulating the neuronal network in a brain region-specific manner
Source: eLife. 2023 Dec 22;12:RP92252. doi: 10.7554/eLife.92252 (PMC10746144; doi:10.7554/eLife.92252)
Supplement: Figure 4—source data 1. [file elife-92252-fig4-data1.xlsx]

## Sheet: Figure 4C
	Induction time				Emergence time
	D7	D21	Statistical test		D7	D21	Statistical test
	177	323	paired t test		96	56	paired t test
	257	371			98	85
	152	308			108	76
	288	250			86	82
	241	319			72	50
	284	256			90	84
	180	256			98	67
	280	290			106	73
	241	245			135	77
