# Supplementary material for: Microglia facilitate and stabilize the response to general anesthesia via modulating the neuronal network in a brain region-specific manner
Source: eLife. 2023 Dec 22;12:RP92252. doi: 10.7554/eLife.92252 (PMC10746144; doi:10.7554/eLife.92252)
Supplement: Figure 4—source data 2. [file elife-92252-fig4-data2.xlsx]

## Sheet: Figure 4D
		Normalized power during consciousness									Normalized power during induction									Normalized power during emergence
		D7			D21			Statistical test			D7			D21			Statistical test			D7			D21			Statistical test
	Frequency	Mean	SEM	N	Mean	SEM	N	paired t test		Frequency	Mean	SEM	N	Mean	SEM	N	paired t test		Frequency	Mean	SEM	N	Mean	SEM	N	paired t test
	0	0.0967158	0.0168189	9	0.0851302	0.0115094	9			0	0.021541	0.00259	9	0.0250494	0.00312	9			0	0.0139923	0.00178097	9	0.050175	0.00939215	9
	0.0610352	0.0969583	0.0168144	9	0.0851826	0.0114984	9			0.061035	0.021758	0.002627	9	0.0250018	0.00305	9			0.0610352	0.0141675	0.00179449	9	0.0502987	0.00939601	9
	0.12207	0.097598	0.0167669	9	0.0854254	0.0114608	9			0.12207	0.022283	0.002722	9	0.0249948	0.002935	9			0.12207	0.014663	0.00182535	9	0.0506077	0.00936959	9
	0.183105	0.0984247	0.0166234	9	0.0859885	0.0113813	9			0.183105	0.022881	0.002811	9	0.0252819	0.002892	9			0.183105	0.0154214	0.00186448	9	0.0510058	0.0092598	9
	0.244141	0.0992643	0.0164179	9	0.0868229	0.0112451	9			0.244141	0.023463	0.00285	9	0.0259568	0.002914	9			0.244141	0.016413	0.00194087	9	0.0515133	0.0090817	9
	0.305176	0.100164	0.0162496	9	0.0876999	0.0110099	9			0.305176	0.024183	0.002871	9	0.0269036	0.002976	9			0.305176	0.0176415	0.00208952	9	0.0522716	0.00888371	9
	0.366211	0.101436	0.0161483	9	0.0885134	0.0106045	9			0.366211	0.025266	0.002944	9	0.0280467	0.0031	9			0.366211	0.0191044	0.00227067	9	0.0533734	0.00865806	9
	0.427246	0.103463	0.0160402	9	0.0895419	0.0100155	9			0.427246	0.02678	0.003106	9	0.0295321	0.003308	9			0.427246	0.0207732	0.00240698	9	0.0547492	0.00835727	9
	0.488281	0.106442	0.0158397	9	0.0912879	0.00935047	9			0.488281	0.028584	0.003315	9	0.0315142	0.003569	9			0.488281	0.0226268	0.00247684	9	0.0563028	0.00799606	9
	0.549316	0.11029	0.0155497	9	0.0940332	0.00876509	9			0.549316	0.030487	0.003498	9	0.0338248	0.003796	9			0.549316	0.0246831	0.00251961	9	0.058123	0.00767207	9
	0.610352	0.114758	0.0152664	9	0.0976245	0.00829792	9			0.610352	0.032398	0.003624	9	0.0360831	0.003977	9			0.610352	0.0269802	0.00259059	9	0.0604156	0.00745469	9
	0.671387	0.119524	0.0150456	9	0.101647	0.00788919	9			0.671387	0.034346	0.00377	9	0.0381859	0.004176	9			0.671387	0.029536	0.00272337	9	0.0631588	0.00730277	9
	0.732422	0.124205	0.0148002	9	0.105624	0.00750322	9			0.732422	0.036443	0.003994	9	0.040445	0.004432	9			0.732422	0.0323389	0.00292446	9	0.0659452	0.00712407	9
	0.793457	0.128384	0.0143914	9	0.109051	0.00712372	9			0.793457	0.038872	0.004122	9	0.0430792	0.004726	9			0.793457	0.0353551	0.003188	9	0.068306	0.00686947	9
	0.854492	0.131752	0.0137905	9	0.111545	0.00668947	9			0.854492	0.041803	0.004055	9	0.0457844	0.005038	9			0.854492	0.0385194	0.00349968	9	0.0701548	0.00654385	9
	0.915527	0.134221	0.013117	9	0.113157	0.00613821	9			0.915527	0.045139	0.004381	9	0.0480648	0.005364	9			0.915527	0.0417423	0.00384395	9	0.0717777	0.00616193	9
	0.976562	0.135843	0.0124604	9	0.114353	0.0055564	9			0.976563	0.048359	0.005493	9	0.0498573	0.005689	9			0.976562	0.0449726	0.00422185	9	0.0734013	0.00574838	9
	1.0376	0.136666	0.0117415	9	0.115448	0.00510712	9			1.0376	0.050839	0.006457	9	0.0515046	0.005979	9			1.0376	0.0482448	0.004665	9	0.0749325	0.00536734	9
	1.09863	0.136761	0.0107949	9	0.116243	0.00484594	9			1.09863	0.052508	0.006656	9	0.0531452	0.006201	9			1.09863	0.0516144	0.00519958	9	0.0761811	0.00507645	9
	1.15967	0.136349	0.00958322	9	0.1165	0.00472107	9			1.15967	0.054059	0.006563	9	0.0544918	0.006368	9			1.15967	0.055055	0.00579515	9	0.0771779	0.00484432	9
	1.2207	0.135766	0.00831238	9	0.11658	0.00472815	9			1.2207	0.056281	0.006927	9	0.0553331	0.006454	9			1.2207	0.0584979	0.00639503	9	0.0781228	0.00458025	9
	1.28174	0.135206	0.00725813	9	0.117152	0.00491233	9			1.28174	0.059188	0.008003	9	0.0559714	0.006441	9			1.28174	0.061988	0.0070078	9	0.0790967	0.0042575	9
	1.34277	0.134556	0.00647557	9	0.118255	0.00519562	9			1.34277	0.062103	0.00931	9	0.0569836	0.006408	9			1.34277	0.0656926	0.00771473	9	0.0800004	0.00394129	9
	1.40381	0.133578	0.00575608	9	0.119164	0.00548376	9			1.40381	0.064661	0.010289	9	0.0587492	0.006496	9			1.40381	0.0696674	0.00854725	9	0.0807948	0.00367452	9
	1.46484	0.13223	0.00492142	9	0.119352	0.00578892	9			1.46484	0.067398	0.011055	9	0.0613562	0.007017	9			1.46484	0.0736877	0.00940007	9	0.0816487	0.00341434	9
	1.52588	0.130739	0.00406849	9	0.119138	0.00614479	9			1.52588	0.07103	0.012013	9	0.0646989	0.00793	9			1.52588	0.0774458	0.0101347	9	0.0827553	0.00312397	9
	1.58691	0.129391	0.00349668	9	0.119119	0.00650091	9			1.58691	0.075398	0.013129	9	0.0683646	0.008833	9			1.58691	0.0809158	0.0107574	9	0.0840718	0.00284983	9
	1.64795	0.12831	0.00339146	9	0.119347	0.00679114	9			1.64795	0.079649	0.014067	9	0.0716199	0.00961	9			1.64795	0.0844087	0.0114011	9	0.0853391	0.00266881	9
	1.70898	0.12744	0.00371783	9	0.119504	0.0070779	9			1.70898	0.083499	0.014881	9	0.0739607	0.01018	9			1.70898	0.0882375	0.012141	9	0.0863528	0.00258754	9
	1.77002	0.126664	0.00434274	9	0.119586	0.00745938	9			1.77002	0.087704	0.016045	9	0.0757517	0.010536	9			1.77002	0.0924248	0.0129329	9	0.0871567	0.00255483	9
	1.83105	0.125883	0.00504278	9	0.119838	0.00787115	9			1.83106	0.09291	0.017711	9	0.0779887	0.01097	9			1.83105	0.0967759	0.0137333	9	0.0879555	0.00255748	9
	1.89209	0.125061	0.00564766	9	0.120144	0.00814531	9			1.89209	0.098457	0.019379	9	0.0812492	0.011688	9			1.89209	0.10113	0.0145702	9	0.0888813	0.00260642	9
	1.95312	0.124254	0.0061616	9	0.120101	0.00829498	9			1.95312	0.102956	0.020572	9	0.0850732	0.012552	9			1.95312	0.105449	0.0154503	9	0.0898795	0.00268983	9
	2.01416	0.123547	0.00669661	9	0.119747	0.00857214	9			2.01416	0.105933	0.021328	9	0.0885378	0.013171	9			2.01416	0.109732	0.0162771	9	0.0908153	0.00279065	9
	2.0752	0.12293	0.007286	9	0.11965	0.00908072	9			2.07519	0.108202	0.021828	9	0.0912754	0.013358	9			2.0752	0.113968	0.016949	9	0.0916569	0.0029106	9
	2.13623	0.122248	0.00782149	9	0.120043	0.00958561	9			2.13623	0.110476	0.021889	9	0.0937062	0.0133	9			2.13623	0.118152	0.0175047	9	0.0925153	0.00306202	9
	2.19727	0.121334	0.0082062	9	0.120417	0.00982554	9			2.19727	0.112369	0.021099	9	0.0963471	0.013237	9			2.19727	0.122274	0.0180657	9	0.093499	0.00324996	9
	2.2583	0.120204	0.00845618	9	0.120297	0.00988772	9			2.2583	0.113335	0.01965	9	0.0991615	0.013216	9			2.2583	0.126266	0.0186505	9	0.0945639	0.00347866	9
	2.31934	0.119044	0.00865079	9	0.119976	0.0101278	9			2.31934	0.114051	0.018415	9	0.101699	0.013174	9			2.31934	0.13005	0.0191489	9	0.0955467	0.00373778	9
	2.38037	0.117989	0.00883171	9	0.11998	0.0106563	9			2.38037	0.115888	0.017961	9	0.103743	0.013156	9			2.38037	0.133624	0.0194951	9	0.0963346	0.00397231	9
	2.44141	0.116959	0.00897983	9	0.120153	0.0111553	9			2.44141	0.119009	0.018218	9	0.105616	0.013258	9			2.44141	0.137036	0.0197575	9	0.0969599	0.00412635	9
	2.50244	0.115777	0.0090867	9	0.11988	0.0112841	9			2.50244	0.121897	0.018599	9	0.107805	0.013485	9			2.50244	0.140262	0.0199982	9	0.0975311	0.00422976	9
	2.56348	0.114421	0.00916867	9	0.119078	0.0111455	9			2.56348	0.123223	0.018533	9	0.11037	0.013688	9			2.56348	0.143196	0.0201438	9	0.0981236	0.00436265	9
	2.62451	0.113087	0.00922621	9	0.11832	0.0111063	9			2.62451	0.123507	0.018104	9	0.112886	0.01384	9			2.62451	0.145785	0.0200914	9	0.0987534	0.00454663	9
	2.68555	0.111976	0.00924863	9	0.117916	0.0112762	9			2.68555	0.124175	0.017795	9	0.114918	0.014064	9			2.68555	0.148083	0.0198832	9	0.0993916	0.00470882	9
	2.74658	0.111066	0.00926071	9	0.117478	0.0114339	9			2.74658	0.125367	0.017882	9	0.116363	0.014306	9			2.74658	0.150169	0.0196603	9	0.0999545	0.00477059	9
	2.80762	0.110175	0.00929508	9	0.116635	0.0114051	9			2.80762	0.125675	0.018062	9	0.117258	0.014341	9			2.80762	0.152083	0.019468	9	0.100323	0.00476902	9
	2.86865	0.109223	0.00931191	9	0.115648	0.011328	9			2.86865	0.124177	0.01781	9	0.117555	0.013977	9			2.86865	0.15389	0.0192271	9	0.100452	0.00480316	9
	2.92969	0.108326	0.00925397	9	0.114939	0.0113623	9			2.92969	0.121805	0.017117	9	0.117383	0.013437	9			2.92969	0.155731	0.0189127	9	0.100464	0.00490062	9
	2.99072	0.107582	0.00913347	9	0.114395	0.0113782	9			2.99072	0.120069	0.01644	9	0.117322	0.013055	9			2.99072	0.157678	0.0186439	9	0.100557	0.0049966	9
	3.05176	0.106881	0.00900323	9	0.113631	0.0111559	9			3.05176	0.119024	0.016049	9	0.11794	0.012707	9			3.05176	0.159596	0.0185318	9	0.100811	0.00502052	9
	3.11279	0.106032	0.0088701	9	0.112681	0.0107717	9			3.11279	0.11741	0.015615	9	0.119018	0.012191	9			3.11279	0.161243	0.0185386	9	0.101122	0.00499812	9
	3.17383	0.105027	0.00869249	9	0.111906	0.0105328	9			3.17383	0.114699	0.014745	9	0.119722	0.011574	9			3.17383	0.162516	0.0185513	9	0.101355	0.00501428	9
	3.23486	0.10402	0.00849135	9	0.111307	0.0105329	9			3.23486	0.112053	0.013677	9	0.119746	0.01119	9			3.23486	0.163559	0.0185493	9	0.101507	0.00508735	9
	3.2959	0.103056	0.00837625	9	0.110469	0.0105354	9			3.2959	0.110863	0.012936	9	0.119763	0.011196	9			3.2959	0.164606	0.0186134	9	0.101661	0.00514477	9
	3.35693	0.102007	0.00841461	9	0.109268	0.010305	9			3.35693	0.110997	0.01262	9	0.120372	0.011117	9			3.35693	0.16578	0.0187829	9	0.101845	0.00512484	9
	3.41797	0.100863	0.00851008	9	0.108145	0.00990609	9			3.41797	0.111175	0.012335	9	0.121083	0.010615	9			3.41797	0.166985	0.0189888	9	0.101987	0.00505848	9
	3.479	0.0998958	0.00850415	9	0.107471	0.00957702	9			3.479	0.110733	0.012015	9	0.121013	0.010006	9			3.479	0.16795	0.0191275	9	0.102009	0.00501166	9
	3.54004	0.0993442	0.00837782	9	0.106999	0.00942139	9			3.54004	0.110171	0.011989	9	0.120353	0.00973	9			3.54004	0.1684	0.0191386	9	0.101895	0.0049824	9
	3.60107	0.0990157	0.00825684	9	0.106251	0.00933829	9			3.60107	0.10994	0.01219	9	0.120265	0.009773	9			3.60107	0.168283	0.0190047	9	0.101668	0.00490883	9
	3.66211	0.0984706	0.00821777	9	0.105167	0.00920186	9			3.66211	0.1095	0.012066	9	0.121233	0.009671	9			3.66211	0.167817	0.0187562	9	0.101361	0.00476989	9
	3.72314	0.0975992	0.00817977	9	0.104041	0.00895365	9			3.72315	0.108139	0.011344	9	0.122356	0.009156	9			3.72314	0.167224	0.0184495	9	0.101042	0.0046292	9
	3.78418	0.0967574	0.00804613	9	0.103002	0.00858465	9			3.78418	0.106206	0.010594	9	0.122728	0.008509	9			3.78418	0.16646	0.0181158	9	0.100798	0.00456115	9
	3.84521	0.0962242	0.00785557	9	0.101951	0.00816246	9			3.84522	0.104803	0.01043	9	0.1228	0.008103	9			3.84521	0.165334	0.017744	9	0.100621	0.00456009	9
	3.90625	0.0957745	0.00772558	9	0.100929	0.00782608	9			3.90625	0.104333	0.010636	9	0.123595	0.007897	9			3.90625	0.163909	0.0173112	9	0.100372	0.00455464	9
	3.96729	0.0950171	0.00767827	9	0.100151	0.00766221	9			3.96728	0.104065	0.010548	9	0.125009	0.007646	9			3.96729	0.162565	0.0168312	9	0.099936	0.0045001	9
	4.02832	0.0939922	0.0076123	9	0.0995929	0.00758601	9			4.02832	0.103307	0.009964	9	0.125872	0.007318	9			4.02832	0.161543	0.0163373	9	0.0994163	0.00442262	9
	4.08936	0.0931197	0.0074795	9	0.0988991	0.00747546	9			4.08936	0.102406	0.009323	9	0.125737	0.007031	9			4.08936	0.160597	0.0158473	9	0.0990586	0.00437236	9
	4.15039	0.0925835	0.00738025	9	0.0978651	0.00732365	9			4.15039	0.10212	0.008885	9	0.125683	0.006859	9			4.15039	0.1593	0.0153486	9	0.0989444	0.00434771	9
	4.21143	0.0920952	0.00740714	9	0.0967681	0.00721167	9			4.21143	0.102396	0.008566	9	0.126916	0.006733	9			4.21143	0.157582	0.0148173	9	0.0988557	0.0043056	9
	4.27246	0.0913707	0.00748215	9	0.0960006	0.00714355	9			4.27246	0.102404	0.008296	9	0.129177	0.00663	9			4.27246	0.155727	0.014266	9	0.0985245	0.00423861	9
	4.3335	0.0905419	0.00744537	9	0.0955528	0.00702409	9			4.3335	0.101723	0.008062	9	0.131156	0.006678	9			4.3335	0.153858	0.0137315	9	0.097948	0.00418807	9
	4.39453	0.0898608	0.00725272	9	0.0950947	0.0068469	9			4.39453	0.100895	0.007873	9	0.132162	0.006913	9			4.39453	0.151748	0.0132446	9	0.0973453	0.00419181	9
	4.45557	0.089203	0.00701812	9	0.0944533	0.0067279	9			4.45557	0.100606	0.007643	9	0.132721	0.007266	9			4.45557	0.149235	0.0128157	9	0.0968397	0.00422393	9
	4.5166	0.0882187	0.00686095	9	0.0937423	0.00673848	9			4.5166	0.100735	0.007309	9	0.133547	0.007634	9			4.5166	0.146551	0.0124748	9	0.0963333	0.00421074	9
	4.57764	0.086941	0.00677391	9	0.0930544	0.0067991	9			4.57764	0.100572	0.007043	9	0.134545	0.007864	9			4.57764	0.144021	0.0123052	9	0.0957303	0.00412815	9
	4.63867	0.0858821	0.00668389	9	0.0923152	0.00681091	9			4.63867	0.099738	0.007025	9	0.135104	0.008021	9			4.63867	0.141595	0.0123511	9	0.0951336	0.00402848	9
	4.69971	0.0853768	0.00658395	9	0.0915132	0.00679644	9			4.69971	0.098556	0.00716	9	0.135012	0.008299	9			4.69971	0.138964	0.0125499	9	0.0947024	0.00398361	9
	4.76074	0.0850977	0.00652357	9	0.0908246	0.00681688	9			4.76074	0.097587	0.007269	9	0.134672	0.008618	9			4.76074	0.136065	0.0128117	9	0.0944055	0.00401713	9
	4.82178	0.0844729	0.00649169	9	0.0903345	0.00682039	9			4.82178	0.097114	0.007262	9	0.134476	0.008808	9			4.82178	0.13319	0.0131304	9	0.0940683	0.00407921	9
	4.88281	0.0834379	0.00642399	9	0.0897971	0.00671795	9			4.88281	0.097086	0.007139	9	0.134351	0.008891	9			4.88281	0.130563	0.0135485	9	0.0936449	0.00411532	9
	4.94385	0.0824736	0.00631871	9	0.0888983	0.00651036	9			4.94385	0.097333	0.007009	9	0.134048	0.009045	9			4.94385	0.128083	0.014036	9	0.0932898	0.00411943	9
	5.00488	0.0819149	0.00623958	9	0.0877091	0.0062846	9			5.00488	0.097732	0.006949	9	0.133644	0.009346	9			5.00488	0.125622	0.0144959	9	0.0931203	0.00413015	9
	5.06592	0.0815247	0.00621761	9	0.0866582	0.00612788	9			5.06592	0.098242	0.006949	9	0.133479	0.009643	9			5.06592	0.123326	0.0148843	9	0.0930378	0.00418464	9
	5.12695	0.080881	0.00620682	9	0.0860086	0.00603798	9			5.12695	0.098814	0.007025	9	0.133561	0.009734	9			5.12695	0.121394	0.0152414	9	0.0928782	0.00427264	9
	5.18799	0.0799558	0.00613753	9	0.0855361	0.00595588	9			5.18799	0.09923	0.007212	9	0.133314	0.009657	9			5.18799	0.119705	0.0155859	9	0.0926586	0.00435039	9
	5.24902	0.0790834	0.00599881	9	0.0848346	0.00581552	9			5.24902	0.099139	0.007509	9	0.132104	0.009619	9			5.24902	0.117907	0.0158602	9	0.0925578	0.00438978	9
	5.31006	0.0784686	0.0058423	9	0.0838261	0.00558389	9			5.31006	0.098408	0.007789	9	0.129925	0.009768	9			5.31006	0.115874	0.0160071	9	0.0926745	0.00442886	9
	5.37109	0.077979	0.00572638	9	0.0828115	0.00529534	9			5.37109	0.097349	0.007938	9	0.12737	0.009963	9			5.37109	0.113811	0.0160451	9	0.0929045	0.00452953	9
	5.43213	0.0774185	0.00566511	9	0.0820402	0.00501499	9			5.43213	0.096413	0.008014	9	0.124967	0.009929	9			5.43213	0.111883	0.0160103	9	0.0930679	0.00469379	9
	5.49316	0.0767651	0.00561601	9	0.0813947	0.00477696	9			5.49316	0.095727	0.008193	9	0.122754	0.009638	9			5.49316	0.109968	0.0158799	9	0.0930824	0.00485599	9
	5.5542	0.0760546	0.00553328	9	0.0805781	0.00455476	9			5.5542	0.095175	0.008547	9	0.120463	0.00924	9			5.5542	0.10789	0.0156316	9	0.0929868	0.00495798	9
	5.61523	0.0752268	0.00540913	9	0.07951	0.00430127	9			5.61523	0.094803	0.00884	9	0.1178	0.008951	9			5.61523	0.105725	0.015329	9	0.0928579	0.00501642	9
	5.67627	0.0742544	0.00528038	9	0.0783988	0.0040361	9			5.67627	0.094728	0.008927	9	0.114481	0.008733	9			5.67627	0.10367	0.0150584	9	0.0927499	0.00508546	9
	5.7373	0.073307	0.00519537	9	0.07743	0.00383027	9			5.73731	0.094587	0.008986	9	0.1104	0.00836	9			5.7373	0.101713	0.0147926	9	0.0926774	0.00517592	9
	5.79834	0.0725907	0.00515757	9	0.0765232	0.00368922	9			5.79834	0.093629	0.009188	9	0.106033	0.007731	9			5.79834	0.0996334	0.0144171	9	0.0926115	0.005247	9
	5.85938	0.072058	0.00513092	9	0.0754893	0.00355293	9			5.85938	0.09168	0.00949	9	0.102335	0.007011	9			5.85938	0.0973483	0.0138945	9	0.0925048	0.00527372	9
	5.92041	0.0714567	0.00508979	9	0.0743477	0.00339677	9			5.92041	0.089626	0.009694	9	0.0997619	0.006557	9			5.92041	0.0950502	0.013327	9	0.0923463	0.00527986	9
	5.98145	0.0706757	0.00502738	9	0.0733358	0.00324307	9			5.98144	0.088441	0.009789	9	0.0975838	0.006347	9			5.98145	0.092936	0.01283	9	0.0921784	0.00529752	9
	6.04248	0.0698692	0.00493105	9	0.0725838	0.00310578	9			6.04248	0.087977	0.009884	9	0.0946802	0.006214	9			6.04248	0.0909343	0.0123948	9	0.0920285	0.00531863	9
	6.10352	0.0691811	0.00477894	9	0.0719212	0.00299272	9			6.10352	0.087283	0.00991	9	0.0910002	0.006067	9			6.10352	0.0888256	0.0119339	9	0.0918339	0.00531098	9
	6.16455	0.0685166	0.00457176	9	0.0711046	0.002925	9			6.16455	0.085976	0.009738	9	0.0876318	0.005899	9			6.16455	0.0865588	0.011418	9	0.0914757	0.00526481	9
	6.22559	0.0677109	0.00437857	9	0.0701495	0.00291438	9			6.22559	0.084592	0.009464	9	0.0852571	0.005731	9			6.22559	0.0843093	0.0109062	9	0.0909069	0.00519809	9
	6.28662	0.0668074	0.0042765	9	0.0692886	0.00293358	9			6.28662	0.083496	0.009329	9	0.0831668	0.005406	9			6.28662	0.0822322	0.0104564	9	0.090226	0.00512845	9
	6.34766	0.066	0.00423878	9	0.0686269	0.00293095	9			6.34766	0.082222	0.009308	9	0.0802658	0.004886	9			6.34766	0.0802809	0.0100664	9	0.0895902	0.00504649	9
	6.40869	0.0653534	0.00416734	9	0.0680039	0.00291765	9			6.40869	0.080309	0.009142	9	0.0765997	0.004384	9			6.40869	0.0783076	0.00970071	9	0.0890498	0.00493424	9
	6.46973	0.0647472	0.00402776	9	0.067254	0.00295116	9			6.46973	0.078216	0.008745	9	0.073221	0.004164	9			6.46973	0.0762571	0.00933053	9	0.0884862	0.00480141	9
	6.53076	0.064094	0.003896	9	0.0664594	0.00299349	9			6.53076	0.076741	0.008438	9	0.0707245	0.004128	9			6.53076	0.0741929	0.00894545	9	0.0877302	0.00467433	9
	6.5918	0.063442	0.00384146	9	0.0658239	0.0029167	9			6.5918	0.075851	0.008412	9	0.0686398	0.003911	9			6.5918	0.072182	0.00855027	9	0.0867286	0.00455115	9
	6.65283	0.0628158	0.00380858	9	0.0653839	0.00269554	9			6.65283	0.074803	0.008448	9	0.0663817	0.00359	9			6.65283	0.0702354	0.00816414	9	0.0855631	0.00438992	9
	6.71387	0.0621106	0.00369338	9	0.0649877	0.00248922	9			6.71387	0.073307	0.008348	9	0.0641367	0.003502	9			6.71387	0.0683565	0.00780638	9	0.084322	0.00416541	9
	6.7749	0.0612583	0.00351198	9	0.0645262	0.00244479	9			6.7749	0.071821	0.008105	9	0.0624196	0.003612	9			6.7749	0.066573	0.00747481	9	0.083015	0.00391745	9
	6.83594	0.0603926	0.00338335	9	0.0640295	0.00252406	9			6.83594	0.070606	0.007898	9	0.0611912	0.003703	9			6.83594	0.0648949	0.00715205	9	0.0816463	0.00370749	9
	6.89697	0.0597111	0.00335533	9	0.0635287	0.00258152	9			6.89697	0.069213	0.007753	9	0.0599371	0.003597	9			6.89697	0.0632899	0.00683725	9	0.0803041	0.00354173	9
	6.95801	0.0592213	0.0033469	9	0.062978	0.00256197	9			6.95801	0.067301	0.007555	9	0.0584483	0.003368	9			6.95801	0.0617407	0.00655328	9	0.0790931	0.00337275	9
	7.01904	0.058757	0.00327808	9	0.0623806	0.00255204	9			7.01904	0.065402	0.00731	9	0.0570341	0.003296	9			7.01904	0.0602932	0.00631584	9	0.0779945	0.00317088	9
	7.08008	0.0582304	0.00319619	9	0.0618588	0.00261631	9			7.08008	0.064291	0.007155	9	0.0559463	0.003462	9			7.08008	0.0589953	0.00611051	9	0.0768776	0.00296704	9
	7.14111	0.0577233	0.00318718	9	0.0614919	0.00271721	9			7.14111	0.063871	0.00707	9	0.0550042	0.003678	9			7.14111	0.0578014	0.00590553	9	0.0756622	0.00281178	9
	7.20215	0.0572994	0.00323695	9	0.0611759	0.00279988	9			7.20215	0.063284	0.006878	9	0.0539469	0.003687	9			7.20215	0.0565921	0.00567169	9	0.0743907	0.00270055	9
	7.26318	0.056864	0.00327112	9	0.0607667	0.00286006	9			7.26318	0.062035	0.006616	9	0.0528641	0.003495	9			7.26318	0.0553023	0.00539286	9	0.0731159	0.00257034	9
	7.32422	0.0562999	0.00325592	9	0.0603046	0.002931	9			7.32422	0.060504	0.006404	9	0.0520368	0.003323	9			7.32422	0.0539872	0.00507642	9	0.0718088	0.00238549	9
	7.38525	0.0556555	0.00323476	9	0.0599547	0.00304201	9			7.38525	0.05929	0.006253	9	0.0514858	0.003313	9			7.38525	0.052743	0.0047603	9	0.0704403	0.00218572	9
	7.44629	0.0550876	0.00325313	9	0.0597462	0.00317524	9			7.44629	0.058521	0.006061	9	0.0509153	0.003368	9			7.44629	0.051602	0.00449326	9	0.0690754	0.00203033	9
	7.50732	0.0546565	0.00330386	9	0.0595206	0.00331096	9			7.50732	0.057959	0.0058	9	0.0500988	0.003353	9			7.50732	0.0505355	0.0042891	9	0.0677893	0.00192982	9
	7.56836	0.0542834	0.00335862	9	0.0591571	0.00345467	9			7.56836	0.057387	0.005618	9	0.0491526	0.003351	9			7.56836	0.0495146	0.00410887	9	0.0665386	0.00183443	9
	7.62939	0.0538952	0.0034192	9	0.0587051	0.00359843	9			7.62939	0.056645	0.005495	9	0.0483763	0.003438	9			7.62939	0.0485194	0.0038985	9	0.065224	0.00170235	9
	7.69043	0.0535055	0.00349714	9	0.0582356	0.00372112	9			7.69043	0.055585	0.005243	9	0.0479168	0.003551	9			7.69043	0.0475162	0.00364794	9	0.063866	0.00156539	9
	7.75146	0.0531319	0.00356095	9	0.0577062	0.00379301	9			7.75146	0.05427	0.004784	9	0.0476601	0.003571	9			7.75146	0.0464915	0.00340646	9	0.0626012	0.00149025	9
	7.8125	0.0527318	0.00356983	9	0.05709	0.00381314	9			7.8125	0.053046	0.004311	9	0.0474024	0.00352	9			7.8125	0.0455019	0.00323246	9	0.0614881	0.00148731	9
	7.87354	0.0522702	0.00352346	9	0.056529	0.00383549	9			7.87354	0.052146	0.004079	9	0.0470452	0.003532	9			7.87354	0.0446246	0.00312448	9	0.0604256	0.00148541	9
	7.93457	0.0517798	0.00347744	9	0.0561873	0.00392578	9			7.93457	0.05135	0.004017	9	0.0466148	0.00364	9			7.93457	0.0438475	0.00301933	9	0.0593085	0.00142848	9
	7.99561	0.051292	0.00346756	9	0.0559783	0.00408519	9			7.99561	0.050322	0.003892	9	0.0461649	0.003732	9			7.99561	0.0430742	0.00286771	9	0.0581641	0.00134331	9
	8.05664	0.0507686	0.00347202	9	0.0556023	0.00423519	9			8.05664	0.049171	0.003632	9	0.045721	0.00368	9			8.05664	0.042262	0.00268465	9	0.0570682	0.00128712	9
	8.11768	0.0501739	0.00345782	9	0.0549017	0.00431001	9			8.11768	0.048349	0.003425	9	0.045292	0.003525	9			8.11768	0.0414855	0.00251752	9	0.0560087	0.00127206	9
	8.17871	0.0495626	0.00341854	9	0.0540555	0.00432888	9			8.17871	0.047981	0.003411	9	0.0448669	0.003376	9			8.17871	0.040815	0.00238219	9	0.0549281	0.00126042	9
	8.23975	0.0489984	0.00338988	9	0.0533458	0.0043511	9			8.23975	0.047662	0.003463	9	0.0443963	0.003271	9			8.23975	0.0401913	0.00226246	9	0.0538441	0.00122573	9
	8.30078	0.0484098	0.00339628	9	0.0528182	0.00438758	9			8.30078	0.047018	0.00338	9	0.0438446	0.003226	9			8.30078	0.0394986	0.00215059	9	0.0528208	0.00118763	9
	8.36182	0.0476511	0.00341475	9	0.0522669	0.00440452	9			8.36182	0.046193	0.003181	9	0.0432797	0.003277	9			8.36182	0.0387318	0.00205561	9	0.05184	0.00116857	9
	8.42285	0.0467306	0.00341127	9	0.0515125	0.00438669	9			8.42285	0.045564	0.003083	9	0.0428462	0.003411	9			8.42285	0.0380036	0.00197261	9	0.0508059	0.00115226	9
	8.48389	0.0458618	0.00337948	9	0.0505889	0.00435398	9			8.48389	0.045164	0.003178	9	0.0426127	0.003505	9			8.48389	0.0373877	0.00187711	9	0.049689	0.00111966	9
	8.54492	0.0452167	0.00332817	9	0.0496519	0.0043222	9			8.54492	0.044679	0.003329	9	0.0425055	0.003467	9			8.54492	0.0368338	0.0017711	9	0.0485762	0.00108902	9
	8.60596	0.0447137	0.00326275	9	0.0487834	0.00427671	9			8.60596	0.043938	0.003315	9	0.0424293	0.003348	9			8.60596	0.0362571	0.00169183	9	0.0475521	0.00109373	9
	8.66699	0.0441404	0.0031771	9	0.0479335	0.00421309	9			8.66699	0.043127	0.003139	9	0.0423738	0.003279	9			8.66699	0.0356421	0.00166078	9	0.046604	0.00113635	9
	8.72803	0.0434226	0.00308023	9	0.0470186	0.00415492	9			8.72803	0.042474	0.002996	9	0.0423322	0.003297	9			8.72803	0.0350235	0.00165037	9	0.0456766	0.00118132	9
	8.78906	0.0426556	0.00299207	9	0.0460333	0.00410929	9			8.78906	0.041941	0.002973	9	0.0421977	0.003284	9			8.78906	0.0344208	0.00162319	9	0.0447584	0.00120121	9
	8.8501	0.0419039	0.00291038	9	0.0450608	0.00404924	9			8.8501	0.041371	0.003004	9	0.0418627	0.003152	9			8.8501	0.0338397	0.00158193	9	0.0438674	0.00120527	9
	8.91113	0.0411136	0.00282041	9	0.044197	0.00396087	9			8.91113	0.040781	0.002993	9	0.0413821	0.002972	9			8.91113	0.0332984	0.00155483	9	0.0430032	0.0012182	9
	8.97217	0.040252	0.00271138	9	0.0434784	0.00387791	9			8.97217	0.040306	0.002945	9	0.0409183	0.002886	9			8.97217	0.0328025	0.00154938	9	0.0421581	0.00124703	9
	9.0332	0.0394084	0.00260292	9	0.0428773	0.00383468	9			9.0332	0.039932	0.002921	9	0.0405437	0.002935	9			9.0332	0.0323208	0.001548	9	0.0413393	0.00126517	9
	9.09424	0.0386769	0.00251882	9	0.0423358	0.00382332	9			9.09424	0.039475	0.002941	9	0.0402121	0.003038	9			9.09424	0.0318268	0.00154411	9	0.0405398	0.00124919	9
	9.15527	0.0380187	0.00246143	9	0.0417728	0.00380981	9			9.15527	0.038888	0.002915	9	0.0399004	0.00309	9			9.15527	0.0313405	0.0015523	9	0.0397229	0.00122063	9
	9.21631	0.0373321	0.00241581	9	0.0410794	0.00377289	9			9.21631	0.03841	0.002802	9	0.0396284	0.003058	9			9.21631	0.0308894	0.00157692	9	0.0388835	0.00121797	9
	9.27734	0.0366084	0.00236583	9	0.040181	0.00372051	9			9.27734	0.038261	0.002678	9	0.0393344	0.002947	9			9.27734	0.0304539	0.00159705	9	0.0380873	0.00124804	9
	9.33838	0.0359296	0.00231927	9	0.039148	0.00366346	9			9.33838	0.038253	0.002621	9	0.0389101	0.002787	9			9.33838	0.0300031	0.00159752	9	0.0373912	0.00127895	9
	9.39941	0.0353344	0.00228823	9	0.0381936	0.0036037	9			9.39941	0.037928	0.002622	9	0.0384069	0.002628	9			9.39941	0.0295622	0.00159294	9	0.036748	0.00127965	9
	9.46045	0.0347775	0.00226722	9	0.037486	0.00354335	9			9.46045	0.037114	0.002583	9	0.0380267	0.002536	9			9.46045	0.0291811	0.00160724	9	0.0360581	0.00125702	9
	9.52148	0.0342183	0.00223807	9	0.0369678	0.00348952	9			9.52148	0.036196	0.002462	9	0.0378169	0.002548	9			9.52148	0.0288446	0.00163871	9	0.0353059	0.00123659	9
	9.58252	0.0336639	0.00219767	9	0.0364213	0.00344811	9			9.58252	0.035707	0.002328	9	0.0375696	0.002584	9			9.58252	0.0284837	0.00166731	9	0.0345783	0.00122522	9
	9.64355	0.033108	0.00215866	9	0.0357202	0.00340882	9			9.64355	0.035718	0.002263	9	0.0371704	0.00253	9			9.64355	0.028084	0.00168725	9	0.0339369	0.001209	9
	9.70459	0.032505	0.00212413	9	0.0349516	0.0033603	9			9.70459	0.035808	0.002242	9	0.0368536	0.002383	9			9.70459	0.0277086	0.00170755	9	0.0333404	0.00118469	9
	9.76562	0.0318454	0.00208441	9	0.0342638	0.00330536	9			9.76562	0.035598	0.002186	9	0.0368671	0.002267	9			9.76562	0.0273904	0.00172835	9	0.0327245	0.00116721	9
	9.82666	0.031195	0.00202961	9	0.0336695	0.00324484	9			9.82666	0.035127	0.002107	9	0.0370176	0.00228	9			9.82666	0.0270677	0.0017345	9	0.0321035	0.00116131	9
	9.8877	0.0306122	0.00196924	9	0.0330686	0.0031812	9			9.8877	0.034653	0.002051	9	0.0368628	0.002376	9			9.8877	0.0266806	0.00172078	9	0.0315405	0.00115231	9
	9.94873	0.030065	0.00192239	9	0.032423	0.00313106	9			9.94873	0.034283	0.002011	9	0.0363293	0.002405	9			9.94873	0.0262751	0.00170529	9	0.0310456	0.00112915	9
	10.0098	0.0294756	0.00189286	9	0.03181	0.00310748	9			10.0098	0.033947	0.001959	9	0.0358078	0.00229	9			10.0098	0.0259456	0.00170931	9	0.0305572	0.00110084	9
	10.0708	0.0288247	0.00187196	9	0.031292	0.00309256	9			10.0708	0.033614	0.001898	9	0.0355647	0.002157	9			10.0708	0.0257034	0.00173417	9	0.0300255	0.00107674	9
	10.1318	0.0281683	0.00185584	9	0.0308116	0.00305112	9			10.1318	0.033333	0.00189	9	0.0353867	0.002125	9			10.1318	0.025469	0.00176349	9	0.029479	0.00105329	9
	10.1929	0.0275681	0.00185327	9	0.030262	0.0029824	9			10.1929	0.033074	0.001933	9	0.0349876	0.002166	9			10.1929	0.0251873	0.00178615	9	0.0289921	0.00102805	9
	10.2539	0.0270375	0.00186199	9	0.0296116	0.00291655	9			10.2539	0.032723	0.001969	9	0.0344907	0.002196	9			10.2539	0.0248859	0.00180408	9	0.0286003	0.00101061	9
	10.3149	0.0265427	0.00186027	9	0.0289025	0.00286349	9			10.3149	0.032272	0.001961	9	0.034218	0.002157	9			10.3149	0.0246145	0.00182162	9	0.0282581	0.00100946	9
	10.376	0.0260258	0.00183088	9	0.0281603	0.00279651	9			10.376	0.031868	0.001958	9	0.0341708	0.002074	9			10.376	0.0243809	0.00183877	9	0.0278823	0.00101406	9
	10.437	0.0254456	0.00177621	9	0.0273773	0.00269607	9			10.437	0.031611	0.002046	9	0.0340437	0.001993	9			10.437	0.024165	0.00185119	9	0.0274405	0.00101004	9
	10.498	0.024828	0.00171794	9	0.0265852	0.00258924	9			10.498	0.03142	0.002168	9	0.0337007	0.001916	9			10.498	0.0239492	0.00185321	9	0.0269886	0.00100009	9
	10.5591	0.0242569	0.00167571	9	0.025873	0.00250989	9			10.5591	0.031185	0.002247	9	0.0333142	0.001835	9			10.5591	0.023714	0.00184241	9	0.0266064	0.000997318	9
	10.6201	0.0237815	0.00164184	9	0.0252879	0.00244844	9			10.6201	0.030935	0.0023	9	0.033004	0.001759	9			10.6201	0.0234397	0.00182599	9	0.0262999	0.0010016	9
	10.6812	0.0233496	0.00159821	9	0.0247629	0.00237075	9			10.6812	0.030763	0.002387	9	0.0326424	0.001697	9			10.6812	0.0231406	0.00181887	9	0.0259975	0.000996574	9
	10.7422	0.022877	0.00154756	9	0.0241927	0.00227246	9			10.7422	0.030639	0.002474	9	0.0321392	0.001657	9			10.7422	0.0228678	0.00182708	9	0.0256475	0.000979059	9
	10.8032	0.0223637	0.00150565	9	0.0235605	0.00217724	9			10.8032	0.03045	0.002473	9	0.031663	0.001645	9			10.8032	0.022651	0.00183876	9	0.0252829	0.000971399	9
	10.8643	0.0218861	0.00148039	9	0.0229359	0.00208803	9			10.8643	0.03016	0.002407	9	0.0313794	0.001643	9			10.8643	0.0224619	0.0018391	9	0.0249661	0.000987507	9
	10.9253	0.0214771	0.00146115	9	0.0223572	0.00198213	9			10.9253	0.029822	0.002389	9	0.0311457	0.001655	9			10.9253	0.0222577	0.00182771	9	0.0246997	0.00100781	9
	10.9863	0.0210808	0.00143204	9	0.0217834	0.00185945	9			10.9863	0.029438	0.002453	9	0.0307001	0.001696	9			10.9863	0.0220358	0.00181265	9	0.0244359	0.00100777	9
	11.0474	0.0206443	0.00139541	9	0.0211833	0.00175872	9			11.0474	0.028968	0.002493	9	0.0300645	0.001764	9			11.0474	0.0218137	0.00179316	9	0.024157	0.000992187	9
	11.1084	0.0201967	0.00136021	9	0.0206054	0.00169407	9			11.1084	0.028483	0.002424	9	0.0295161	0.001818	9			11.1084	0.0215812	0.00176149	9	0.0238993	0.00098444	9
	11.1694	0.0197979	0.00132593	9	0.0201048	0.00162272	9			11.1694	0.02816	0.002311	9	0.0291754	0.001817	9			11.1694	0.021316	0.00172052	9	0.0236882	0.000989553	9
	11.2305	0.0194543	0.00129477	9	0.0196436	0.00150719	9			11.2305	0.028051	0.002278	9	0.0288551	0.001793	9			11.2305	0.0210356	0.00168456	9	0.0234934	0.000989411	9
	11.2915	0.0191295	0.00128172	9	0.0191389	0.00137589	9			11.2915	0.027973	0.002324	9	0.0283726	0.001796	9			11.2915	0.0207852	0.00166097	9	0.0232707	0.000974083	9
	11.3525	0.0188104	0.00128932	9	0.0185958	0.0012836	9			11.3525	0.027736	0.002339	9	0.027811	0.001843	9			11.3525	0.0205721	0.00164147	9	0.0230239	0.000957329	9
	11.4136	0.0185102	0.00128777	9	0.018112	0.0012306	9			11.4136	0.02737	0.002278	9	0.0273519	0.001895	9			11.4136	0.0203542	0.00161726	9	0.0227975	0.000954896	9
	11.4746	0.0182215	0.00125444	9	0.0177337	0.00117477	9			11.4746	0.027023	0.002215	9	0.0269921	0.001876	9			11.4746	0.0201068	0.00159295	9	0.0226175	0.000960404	9
	11.5356	0.0179167	0.00121193	9	0.0173856	0.0010957	9			11.5356	0.026711	0.002213	9	0.0265896	0.001796	9			11.5356	0.0198579	0.00157733	9	0.0224606	0.000957792	9
	11.5967	0.0175951	0.00119975	9	0.0169872	0.00101832	9			11.5967	0.026332	0.002223	9	0.0261195	0.001729	9			11.5967	0.019635	0.00156738	9	0.0222838	0.000947962	9
	11.6577	0.0172886	0.00121661	9	0.0165741	0.000965674	9			11.6577	0.025915	0.002198	9	0.0257135	0.001718	9			11.6577	0.0194125	0.00155085	9	0.0220724	0.000944198	9
	11.7188	0.0170139	0.00122038	9	0.0162317	0.000919738	9			11.7188	0.025654	0.002163	9	0.0254394	0.001754	9			11.7188	0.0191495	0.00152359	9	0.0218545	0.000949176	9
	11.7798	0.0167487	0.0011876	9	0.0159538	0.000861635	9			11.7798	0.025615	0.002167	9	0.0251835	0.001792	9			11.7798	0.0188584	0.00149433	9	0.0216687	0.000954146	9
	11.8408	0.0164705	0.0011501	9	0.0156541	0.000803721	9			11.8408	0.025558	0.002181	9	0.0248087	0.001809	9			11.8408	0.0185937	0.00147376	9	0.0215182	0.000956376	9
	11.9019	0.0161905	0.00115084	9	0.0153094	0.000770052	9			11.9019	0.025208	0.002135	9	0.0243348	0.001811	9			11.9019	0.0183769	0.00146372	9	0.0213665	0.000963063	9
	11.9629	0.0159349	0.00117567	9	0.0149966	0.000755941	9			11.9629	0.024606	0.00205	9	0.0238907	0.0018	9			11.9629	0.0181728	0.00145754	9	0.0211849	0.000972761	9
	12.0239	0.0157065	0.00117422	9	0.0147657	0.000732324	9			12.0239	0.024057	0.002014	9	0.0235431	0.001798	9			12.0239	0.0179468	0.00144968	9	0.0209915	0.000970118	9
	12.085	0.0154781	0.00113098	9	0.0145589	0.000691751	9			12.085	0.023719	0.002073	9	0.0232547	0.001844	9			12.085	0.0177103	0.00144005	9	0.0208219	0.000947544	9
	12.146	0.015221	0.00108244	9	0.0143074	0.000656484	9			12.146	0.023423	0.002133	9	0.0229841	0.001937	9			12.146	0.0174911	0.00143258	9	0.02067	0.0009194	9
	12.207	0.0149375	0.00106606	9	0.014043	0.00064395	9			12.207	0.022955	0.002097	9	0.0227309	0.002007	9			12.207	0.0172849	0.00142947	9	0.0204919	0.000908439	9
	12.2681	0.0146689	0.0010729	9	0.0138452	0.000643486	9			12.2681	0.02241	0.002011	9	0.0224671	0.00198	9			12.2681	0.0170656	0.0014271	9	0.0202763	0.000919609	9
	12.3291	0.0144615	0.00107143	9	0.0137151	0.000636296	9			12.3291	0.0221	0.002	9	0.0221097	0.001878	9			12.3291	0.0168313	0.00142343	9	0.020073	0.00093909	9
	12.3901	0.0143106	0.00105539	9	0.0135777	0.000620124	9			12.3901	0.022138	0.002073	9	0.0216335	0.001812	9			12.3901	0.0166087	0.00142307	9	0.0199263	0.000953569	9
	12.4512	0.0141503	0.00104517	9	0.0133944	0.00060409	9			12.4512	0.022269	0.002127	9	0.0211706	0.001829	9			12.4512	0.0164121	0.00143126	9	0.0198084	0.000959802	9
	12.5122	0.0139261	0.00105154	9	0.0131988	0.000588081	9			12.5122	0.022173	0.002115	9	0.0209089	0.001875	9			12.5122	0.0162219	0.00144307	9	0.0196568	0.000960256	9
	12.5732	0.0136677	0.00105784	9	0.0130177	0.000563658	9			12.5732	0.021856	0.002079	9	0.0208719	0.001895	9			12.5732	0.0160133	0.00144462	9	0.0194649	0.000956988	9
	12.6343	0.0134539	0.00105008	9	0.0128308	0.000532061	9			12.6343	0.021594	0.002082	9	0.0208638	0.001892	9			12.6343	0.0157892	0.00143017	9	0.0192882	0.000955448	9
	12.6953	0.0133085	0.00103353	9	0.0126305	0.000508291	9			12.6953	0.021538	0.002111	9	0.0206808	0.00192	9			12.6953	0.015572	0.00141326	9	0.0191584	0.000961046	9
	12.7563	0.0131771	0.0010178	9	0.0124557	0.000502774	9			12.7563	0.021511	0.0021	9	0.0203389	0.001976	9			12.7563	0.015374	0.00141225	9	0.0190351	0.000966915	9
	12.8174	0.0130165	0.00100659	9	0.012328	0.000504584	9			12.8174	0.021275	0.00203	9	0.0200307	0.002012	9			12.8174	0.0151894	0.00142609	9	0.0188646	0.000960511	9
	12.8784	0.0128562	0.000997025	9	0.0122072	0.000495419	9			12.8784	0.020867	0.001958	9	0.0198698	0.002025	9			12.8784	0.0150098	0.00143634	9	0.0186576	0.000941183	9
	12.9395	0.0127339	0.000989914	9	0.0120584	0.000472144	9			12.9395	0.020549	0.001935	9	0.0197559	0.002045	9			12.9395	0.0148324	0.00143007	9	0.0184725	0.000922793	9
	13.0005	0.0126201	0.000985832	9	0.0119216	0.000450078	9			13.0005	0.020447	0.001922	9	0.0195229	0.002065	9			13.0005	0.0146534	0.00141109	9	0.0183347	0.000916514	9
	13.0615	0.012462	0.000978288	9	0.0118514	0.00044558	9			13.0615	0.020414	0.001873	9	0.0191564	0.002032	9			13.0615	0.0144683	0.00139083	9	0.0182062	0.000915101	9
	13.1226	0.0122792	0.000962269	9	0.011815	0.000450459	9			13.1226	0.02028	0.001809	9	0.0187966	0.001923	9			13.1226	0.0142814	0.00137665	9	0.0180404	0.00090608	9
	13.1836	0.0121455	0.00094027	9	0.0117224	0.000439826	9			13.1836	0.020083	0.001783	9	0.0185551	0.001811	9			13.1836	0.0141037	0.00136934	9	0.017841	0.00089065	9
	13.2446	0.0120761	0.000918844	9	0.0115553	0.000413138	9			13.2446	0.019946	0.001804	9	0.0184078	0.001774	9			13.2446	0.0139384	0.00136792	9	0.0176509	0.000878763	9
	13.3057	0.0119979	0.000903039	9	0.0113944	0.000393893	9			13.3057	0.019846	0.001823	9	0.01828	0.001798	9			13.3057	0.0137763	0.00136999	9	0.0174973	0.000874746	9
	13.3667	0.0118576	0.00089668	9	0.0112989	0.000395006	9			13.3667	0.01967	0.001817	9	0.0181584	0.001812	9			13.3667	0.0136121	0.00136891	9	0.0173702	0.000874853	9
	13.4277	0.0117023	0.000901562	9	0.0112253	0.000405384	9			13.4277	0.019475	0.001802	9	0.0180608	0.001789	9			13.4277	0.0134526	0.00135971	9	0.017251	0.000875938	9
	13.4888	0.0116083	0.000913997	9	0.0111064	0.000404788	9			13.4888	0.019475	0.00183	9	0.0179488	0.001774	9			13.4888	0.0133016	0.00134339	9	0.0171406	0.000878332	9
	13.5498	0.0115679	0.000922542	9	0.0109586	0.00039507	9			13.5498	0.019709	0.001905	9	0.017758	0.001786	9			13.5498	0.0131457	0.00132423	9	0.0170462	0.000880275	9
	13.6108	0.011503	0.000915516	9	0.0108506	0.000395035	9			13.6108	0.019895	0.001953	9	0.0175153	0.001799	9			13.6108	0.0129705	0.00130614	9	0.0169546	0.000876562	9
	13.6719	0.0113782	0.000893854	9	0.0107941	0.000407027	9			13.6719	0.01974	0.001927	9	0.0173396	0.001778	9			13.6719	0.0127874	0.00129131	9	0.0168426	0.000865949	9
	13.7329	0.0112425	0.000867861	9	0.0107303	0.000416139	9			13.7329	0.019317	0.001846	9	0.017284	0.001744	9			13.7329	0.0126258	0.00128145	9	0.0167118	0.000854467	9
	13.7939	0.0111498	0.000844937	9	0.0106268	0.000416094	9			13.794	0.018973	0.00178	9	0.0172345	0.00173	9			13.7939	0.0124957	0.0012771	9	0.016592	0.000847876	9
	13.855	0.0110872	0.000827805	9	0.0105254	0.000419852	9			13.855	0.018897	0.001772	9	0.0170374	0.001718	9			13.855	0.0123727	0.00127487	9	0.016497	0.000846569	9
	13.916	0.0110089	0.000817572	9	0.0104731	0.00043622	9			13.916	0.018942	0.001798	9	0.0167019	0.001668	9			13.916	0.0122293	0.00126905	9	0.0163988	0.000847541	9
	13.9771	0.0109106	0.000813172	9	0.0104495	0.000453256	9			13.9771	0.018887	0.001828	9	0.0164006	0.001581	9			13.9771	0.0120704	0.00125727	9	0.0162643	0.000846606	9
	14.0381	0.0108315	0.000811535	9	0.0103985	0.000456119	9			14.0381	0.018723	0.001848	9	0.0162598	0.001516	9			14.0381	0.0119242	0.00124233	9	0.0161046	0.000840148	9
	14.0991	0.0107909	0.000812272	9	0.0103052	0.000448221	9			14.0991	0.018588	0.001863	9	0.0162247	0.001497	9			14.0991	0.0118053	0.00122951	9	0.0159601	0.000826952	9
	14.1602	0.0107573	0.000818264	9	0.0102047	0.000445463	9			14.1602	0.018531	0.001876	9	0.016165	0.001495	9			14.1602	0.0116983	0.00122169	9	0.0158447	0.000812481	9
	14.2212	0.0106908	0.000827439	9	0.0101238	0.000453358	9			14.2212	0.018484	0.001888	9	0.0160486	0.001478	9			14.2212	0.0115809	0.00121727	9	0.0157338	0.000805491	9
	14.2822	0.0105939	0.00082764	9	0.0100493	0.00046065	9			14.2822	0.018416	0.001892	9	0.0159373	0.001448	9			14.2822	0.0114482	0.00121425	9	0.0156114	0.000808016	9
	14.3433	0.0105027	0.000809593	9	0.00996116	0.000460033	9			14.3433	0.018367	0.001895	9	0.0158527	0.001428	9			14.3433	0.0113112	0.0012127	9	0.0154952	0.000814039	9
	14.4043	0.0104383	0.000783143	9	0.0098687	0.000460126	9			14.4043	0.018316	0.001909	9	0.0157406	0.001434	9			14.4043	0.0111793	0.00121327	9	0.0154009	0.00081594	9
	14.4653	0.0103861	0.00076922	9	0.00980051	0.000469698	9			14.4653	0.018158	0.001911	9	0.0155771	0.001455	9			14.4653	0.0110538	0.0012137	9	0.0153128	0.000810994	9
	14.5264	0.0103271	0.00077383	9	0.00976794	0.000484378	9			14.5264	0.017863	0.001884	9	0.0154214	0.001469	9			14.5264	0.0109356	0.00120853	9	0.0152116	0.000799727	9
	14.5874	0.0102709	0.000779949	9	0.0097527	0.000493317	9			14.5874	0.017578	0.001837	9	0.0153156	0.001461	9			14.5874	0.0108262	0.00119544	9	0.0151092	0.00078663	9
	14.6484	0.0102428	0.000771142	9	0.0097282	0.000495024	9			14.6484	0.017461	0.001798	9	0.015201	0.001432	9			14.6484	0.0107195	0.00117904	9	0.0150246	0.000779491	9
	14.7095	0.0102413	0.00075391	9	0.00968535	0.000497365	9			14.7095	0.017464	0.001787	9	0.0150045	0.001389	9			14.7095	0.0106005	0.00116515	9	0.0149421	0.000780879	9
	14.7705	0.0102283	0.000746995	9	0.00963543	0.000505677	9			14.7705	0.017402	0.001779	9	0.0147694	0.001338	9			14.7705	0.0104606	0.00115204	9	0.0148315	0.000783146	9
	14.8315	0.0101719	0.000753197	9	0.0095909	0.00051766	9			14.8315	0.017217	0.00176	9	0.0146174	0.001291	9			14.8315	0.0103126	0.00113333	9	0.0147036	0.000777309	9
	14.8926	0.0100875	0.000758119	9	0.0095485	0.000527043	9			14.8926	0.017057	0.001759	9	0.0145817	0.001268	9			14.8926	0.0101837	0.00111055	9	0.0146055	0.000767472	9
	14.9536	0.0100218	0.000753818	9	0.00949594	0.000530288	9			14.9536	0.017051	0.001804	9	0.0145569	0.001281	9			14.9536	0.0100872	0.00109422	9	0.0145521	0.000764636	9
	15.0146	0.00999506	0.000749433	9	0.00943296	0.000528354	9			15.0146	0.017103	0.001866	9	0.0144415	0.001309	9			15.0146	0.0100072	0.00108926	9	0.0144991	0.000771367	9
	15.0757	0.00997776	0.000753277	9	0.00937508	0.000525487	9			15.0757	0.01702	0.001889	9	0.0142648	0.001322	9			15.0757	0.00991754	0.00108577	9	0.0144026	0.000778359	9
	15.1367	0.00993095	0.000755836	9	0.00933089	0.00052521	9			15.1367	0.016785	0.001863	9	0.0141299	0.001308	9			15.1367	0.00981091	0.00107317	9	0.0142767	0.000777282	9
	15.1978	0.00985621	0.000746382	9	0.00928655	0.00052744	9			15.1977	0.016598	0.001838	9	0.014077	0.00129	9			15.1978	0.00970329	0.00105816	9	0.0141646	0.000771822	9
	15.2588	0.00978929	0.000731633	9	0.0092261	0.000530278	9			15.2588	0.016601	0.001859	9	0.0140575	0.001295	9			15.2588	0.00960882	0.00105631	9	0.0140772	0.000768611	9
	15.3198	0.00974979	0.000727645	9	0.00916042	0.000530678	9			15.3198	0.016684	0.001905	9	0.0140168	0.001319	9			15.3198	0.00952194	0.00106749	9	0.0139909	0.000767206	9
	15.3809	0.00971688	0.000737214	9	0.00911709	0.000530115	9			15.3809	0.01663	0.001939	9	0.0139425	0.001337	9			15.3809	0.00942951	0.00107262	9	0.0138973	0.000762977	9
	15.4419	0.00966075	0.000744572	9	0.00910026	0.000533071	9			15.4419	0.016394	0.001956	9	0.0138397	0.001341	9			15.4419	0.009331	0.00105909	9	0.013816	0.000755773	9
	15.5029	0.00958208	0.000737244	9	0.00908053	0.000535873	9			15.5029	0.01614	0.001965	9	0.0137168	0.001344	9			15.5029	0.00923616	0.00103765	9	0.0137541	0.000750414	9
	15.564	0.00950638	0.000719789	9	0.00903487	0.000531594	9			15.564	0.016022	0.001962	9	0.0136	0.001356	9			15.564	0.00914806	0.00102568	9	0.0136862	0.000749334	9
	15.625	0.00944753	0.000703922	9	0.00897938	0.00052114	9			15.625	0.016008	0.001946	9	0.0135122	0.001374	9			15.625	0.0090608	0.00102258	9	0.0135898	0.000749768	9
	15.686	0.00939467	0.000694879	9	0.00894442	0.00051429	9			15.686	0.015976	0.00194	9	0.0134258	0.001386	9			15.686	0.0089734	0.00101429	9	0.0134809	0.00074749	9
	15.7471	0.00933572	0.000692124	9	0.00892775	0.00051798	9			15.7471	0.015878	0.001959	9	0.0132882	0.001385	9			15.7471	0.0088918	0.000996675	9	0.0133926	0.000741821	9
	15.8081	0.00927729	0.000695259	9	0.00889555	0.000527728	9			15.8081	0.015774	0.00198	9	0.0131122	0.001375	9			15.8081	0.00881296	0.000980041	9	0.0133307	0.00073483	9
	15.8691	0.0092319	0.000704629	9	0.00883056	0.000534087	9			15.8691	0.01572	0.001977	9	0.0129814	0.001362	9			15.8691	0.00872067	0.000970481	9	0.0132717	0.000730158	9
	15.9302	0.00919612	0.00071554	9	0.00875647	0.000535393	9			15.9302	0.015702	0.001981	9	0.0129251	0.001359	9			15.9302	0.00860841	0.000960697	9	0.0132028	0.000732148	9
	15.9912	0.00915381	0.000719073	9	0.00870353	0.000539652	9			15.9912	0.015682	0.002028	9	0.0128503	0.001367	9			15.9912	0.00849757	0.000944774	9	0.0131399	0.000740325	9
	16.0522	0.00909771	0.000713524	9	0.00866748	0.000549025	9			16.0523	0.015652	0.002091	9	0.0126671	0.001378	9			16.0522	0.00841662	0.000930142	9	0.0130981	0.000745793	9
	16.1133	0.00903692	0.000706912	9	0.00862124	0.000555711	9			16.1133	0.01561	0.002101	9	0.0124436	0.001381	9			16.1133	0.00836325	0.000925776	9	0.0130601	0.000740534	9
	16.1743	0.00898358	0.00070838	9	0.00855992	0.000554394	9			16.1743	0.01553	0.002058	9	0.0123364	0.001379	9			16.1743	0.00830276	0.000927014	9	0.012992	0.000730516	9
	16.2354	0.00894133	0.000718814	9	0.00851136	0.000550284	9			16.2354	0.015406	0.002047	9	0.0123676	0.001378	9			16.2354	0.00821021	0.000922662	9	0.0128874	0.000728841	9
	16.2964	0.00890756	0.000730204	9	0.00849676	0.000554348	9			16.2964	0.015292	0.002115	9	0.0123771	0.001372	9			16.2964	0.00810135	0.000912525	9	0.0127783	0.000737253	9
	16.3574	0.00887825	0.000734647	9	0.00849862	0.000568241	9			16.3574	0.015268	0.002201	9	0.0122386	0.001349	9			16.3574	0.00801034	0.000906483	9	0.0126948	0.000743071	9
	16.4185	0.00884825	0.000732136	9	0.00848266	0.000580573	9			16.4185	0.015341	0.002226	9	0.0120327	0.00132	9			16.4185	0.00794489	0.000907263	9	0.0126299	0.000736788	9
	16.4795	0.00881535	0.000729784	9	0.0084428	0.000584137	9			16.4795	0.015417	0.002206	9	0.0119221	0.001311	9			16.4795	0.00787962	0.000905762	9	0.0125585	0.000725642	9
	16.5405	0.00878698	0.000734146	9	0.0084063	0.000584932	9			16.5405	0.015394	0.002221	9	0.0119195	0.001327	9			16.5405	0.00779341	0.000895526	9	0.0124818	0.000724362	9
	16.6016	0.00877346	0.000744675	9	0.00839329	0.000590409	9			16.6016	0.015264	0.002279	9	0.01189	0.00134	9			16.6016	0.0076964	0.000881861	9	0.0124284	0.000736473	9
	16.6626	0.00876899	0.00075413	9	0.0083886	0.00059707	9			16.6626	0.015101	0.002309	9	0.011769	0.001326	9			16.6626	0.00761128	0.00087243	9	0.0124066	0.000752532	9
	16.7236	0.00874947	0.00075545	9	0.00836381	0.000595682	9			16.7236	0.014963	0.002268	9	0.0116552	0.001297	9			16.7236	0.00754037	0.000866313	9	0.0123825	0.000764192	9
	16.7847	0.00870011	0.000747115	9	0.00831534	0.00058572	9			16.7847	0.014833	0.002197	9	0.0116465	0.00129	9			16.7847	0.00746676	0.000859149	9	0.0123236	0.000772069	9
	16.8457	0.00863942	0.00073155	9	0.00826503	0.00057825	9			16.8457	0.014682	0.002141	9	0.0116817	0.001313	9			16.8457	0.00738312	0.000852782	9	0.0122458	0.000779668	9
	16.9067	0.00860275	0.000714336	9	0.0082275	0.000582432	9			16.9067	0.014531	0.002098	9	0.0116283	0.001329	9			16.9067	0.00730176	0.000851072	9	0.0121915	0.000785765	9
	16.9678	0.00860208	0.000705705	9	0.00819461	0.000592942	9			16.9678	0.014431	0.002061	9	0.011474	0.001306	9			16.9678	0.00723277	0.000851165	9	0.012166	0.000788684	9
	17.0288	0.0086129	0.000712356	9	0.00815513	0.000597239	9			17.0288	0.014367	0.002049	9	0.0113334	0.001265	9			17.0288	0.00716817	0.000847544	9	0.0121298	0.000791021	9
	17.0898	0.00860285	0.000726778	9	0.0081137	0.000590747	9			17.0898	0.014259	0.002064	9	0.0112735	0.001244	9			17.0898	0.00709747	0.000842631	9	0.0120567	0.000797779	9
	17.1509	0.00856361	0.000730671	9	0.00808028	0.000579215	9			17.1509	0.014059	0.00205	9	0.0112233	0.001243	9			17.1509	0.00702703	0.000843936	9	0.0119694	0.000810072	9
	17.2119	0.00851145	0.00071649	9	0.00805221	0.00056938	9			17.2119	0.013828	0.001962	9	0.0110922	0.001223	9			17.2119	0.00696907	0.000851169	9	0.0119021	0.000822161	9
	17.2729	0.00846562	0.000702684	9	0.00801993	0.000563413	9			17.273	0.013658	0.001849	9	0.010909	0.001181	9			17.2729	0.00691809	0.000854883	9	0.0118517	0.000828583	9
	17.334	0.00843238	0.000707928	9	0.00798475	0.000562039	9			17.334	0.013555	0.001787	9	0.0107812	0.001154	9			17.334	0.00685539	0.000850201	9	0.0117932	0.000830195	9
	17.395	0.00840365	0.000723089	9	0.00795744	0.000566098	9			17.395	0.013448	0.001772	9	0.0107427	0.001167	9			17.395	0.00677722	0.000844944	9	0.0117253	0.000833534	9
	17.4561	0.00836525	0.000722502	9	0.00794078	0.000572855	9			17.4561	0.013299	0.001744	9	0.010707	0.001188	9			17.4561	0.00670181	0.000848017	9	0.0116718	0.000842832	9
	17.5171	0.00831132	0.000700819	9	0.00792505	0.000576631	9			17.5171	0.013155	0.001691	9	0.0105867	0.001175	9			17.5171	0.00664273	0.000855645	9	0.0116383	0.000854239	9
	17.5781	0.00825598	0.000684353	9	0.00790102	0.000576029	9			17.5781	0.013057	0.00166	9	0.0104084	0.00115	9			17.5781	0.00658992	0.000856716	9	0.0116007	0.000862563	9
	17.6392	0.00822419	0.000691576	9	0.00786711	0.000576204	9			17.6392	0.012974	0.001675	9	0.0102696	0.001161	9			17.6392	0.00652747	0.000848763	9	0.0115422	0.000869146	9
	17.7002	0.00822201	0.000707618	9	0.00782358	0.000580355	9			17.7002	0.012849	0.00169	9	0.0102039	0.001199	9			17.7002	0.00645851	0.000840652	9	0.0114789	0.000878858	9
	17.7612	0.00822043	0.000704588	9	0.00777113	0.000582816	9			17.7612	0.01268	0.001661	9	0.0101444	0.001207	9			17.7612	0.00639826	0.000839904	9	0.0114329	0.000891466	9
	17.8223	0.00818056	0.000681045	9	0.00771831	0.000576693	9			17.8223	0.012519	0.001607	9	0.0100326	0.001164	9			17.8223	0.00634874	0.000843706	9	0.011399	0.000900528	9
	17.8833	0.00809651	0.000663299	9	0.00767907	0.000564509	9			17.8833	0.012391	0.001571	9	0.00991168	0.001127	9			17.8833	0.00629613	0.000844156	9	0.0113565	0.000902301	9
	17.9443	0.00800359	0.000665403	9	0.00765767	0.000555755	9			17.9443	0.01228	0.00156	9	0.00985715	0.001145	9			17.9443	0.00623249	0.000838591	9	0.0113021	0.00090181	9
	18.0054	0.00794119	0.00067182	9	0.00764398	0.000554538	9			18.0054	0.012184	0.001559	9	0.00983973	0.001193	9			18.0054	0.00616552	0.000831433	9	0.0112501	0.000904645	9
	18.0664	0.007916	0.000662537	9	0.00762764	0.000555428	9			18.0664	0.012128	0.001557	9	0.00973489	0.001212	9			18.0664	0.00610373	0.000828191	9	0.0112039	0.000908848	9
	18.1274	0.00790633	0.000644688	9	0.00760739	0.000554214	9			18.1274	0.012118	0.001563	9	0.00949244	0.001176	9			18.1274	0.00604472	0.000829839	9	0.0111469	0.000909183	9
	18.1885	0.00789262	0.00064023	9	0.0075829	0.000553898	9			18.1885	0.012127	0.001591	9	0.00923082	0.001127	9			18.1885	0.0059846	0.000831871	9	0.0110682	0.000905099	9
	18.2495	0.00787237	0.000655261	9	0.00754987	0.000557193	9			18.2495	0.012133	0.001642	9	0.00910368	0.001116	9			18.2495	0.00592849	0.00082872	9	0.0109819	0.000902178	9
	18.3105	0.0078495	0.00067434	9	0.00751122	0.000561462	9			18.3105	0.012132	0.001699	9	0.00911069	0.00115	9			18.3105	0.00588241	0.000820162	9	0.0109102	0.000903232	9
	18.3716	0.00782386	0.000682283	9	0.00748101	0.000563089	9			18.3716	0.012106	0.001733	9	0.0091123	0.001186	9			18.3716	0.0058414	0.000811926	9	0.0108572	0.000903785	9
	18.4326	0.00779617	0.000681808	9	0.00746596	0.000564092	9			18.4326	0.012012	0.001724	9	0.00901756	0.001202	9			18.4326	0.00579507	0.000808201	9	0.010808	0.000898979	9
	18.4937	0.00777303	0.00068043	9	0.0074531	0.000569825	9			18.4936	0.011847	0.001679	9	0.0088761	0.001212	9			18.4937	0.00574169	0.000805105	9	0.0107502	0.000889644	9
	18.5547	0.00775709	0.00067728	9	0.00742881	0.000580043	9			18.5547	0.011682	0.001641	9	0.00877093	0.001232	9			18.5547	0.00568848	0.000795565	9	0.0106852	0.000880921	9
	18.6157	0.00773669	0.000668422	9	0.00739949	0.000588276	9			18.6157	0.011587	0.00165	9	0.0087029	0.001248	9			18.6157	0.00563966	0.000780838	9	0.0106169	0.000876871	9
	18.6768	0.00769698	0.000657544	9	0.00737641	0.000588559	9			18.6768	0.011553	0.001699	9	0.00862888	0.001244	9			18.6768	0.00559272	0.000770625	9	0.010541	0.000877185	9
	18.7378	0.00764317	0.00065315	9	0.00735009	0.00058243	9			18.7378	0.011525	0.001737	9	0.00855033	0.001225	9			18.7378	0.00554591	0.000769759	9	0.0104524	0.000878989	9
	18.7988	0.00760222	0.000657602	9	0.00730384	0.000578284	9			18.7988	0.011492	0.00175	9	0.00849408	0.001207	9			18.7988	0.00550168	0.000770793	9	0.0103596	0.000879423	9
	18.8599	0.00759296	0.000663435	9	0.00724893	0.000581615	9			18.8599	0.011481	0.001768	9	0.0084427	0.001192	9			18.8599	0.00546154	0.000764397	9	0.0102801	0.000876111	9
	18.9209	0.00759936	0.000663678	9	0.00721715	0.000587957	9			18.9209	0.011482	0.00181	9	0.00836019	0.001175	9			18.9209	0.00542379	0.000753077	9	0.0102188	0.000869011	9
	18.9819	0.00758467	0.000661289	9	0.00721267	0.000588472	9			18.9819	0.011429	0.001847	9	0.00827241	0.001159	9			18.9819	0.00538771	0.000747683	9	0.0101595	0.000860834	9
	19.043	0.00753426	0.000662197	9	0.00720011	0.000582493	9			19.043	0.011291	0.001837	9	0.0082439	0.001158	9			19.043	0.00535359	0.000752145	9	0.0100865	0.000854177	9
	19.104	0.00747562	0.000668618	9	0.00715522	0.000579661	9			19.104	0.011121	0.001791	9	0.00826637	0.001173	9			19.104	0.00531707	0.000758705	9	0.0100074	0.000848931	9
	19.165	0.00744889	0.000678994	9	0.00710177	0.000588465	9			19.165	0.010992	0.001762	9	0.00824386	0.00118	9			19.165	0.00527128	0.000759307	9	0.00994133	0.000843507	9
	19.2261	0.00746207	0.000692346	9	0.00707442	0.000604306	9			19.2261	0.010919	0.001793	9	0.00811904	0.001159	9			19.2261	0.00521877	0.000755574	9	0.00988751	0.000837666	9
	19.2871	0.00748363	0.000708531	9	0.007064	0.000614182	9			19.2871	0.010868	0.001864	9	0.00795633	0.001118	9			19.2871	0.00517389	0.000754149	9	0.0098238	0.000832862	9
	19.3481	0.00747913	0.000723558	9	0.00703008	0.000612882	9			19.3481	0.010823	0.001926	9	0.0078581	0.001087	9			19.3481	0.00514612	0.000756954	9	0.00974317	0.000830512	9
	19.4092	0.00744611	0.000731438	9	0.00695964	0.000607823	9			19.4092	0.01079	0.001956	9	0.007842	0.001082	9			19.4092	0.00512602	0.000760254	9	0.00967258	0.000830281	9
	19.4702	0.00740813	0.000732337	9	0.00688233	0.000606184	9			19.4702	0.010762	0.001972	9	0.00784813	0.001097	9			19.4702	0.00509655	0.000760426	9	0.00963766	0.000830964	9
	19.5312	0.00738122	0.000731874	9	0.00682682	0.000604088	9			19.5312	0.010727	0.002008	9	0.00783338	0.001115	9			19.5312	0.00505545	0.000757378	9	0.00962082	0.00083146	9
	19.5923	0.00735676	0.000730105	9	0.00679035	0.000596043	9			19.5923	0.010705	0.002064	9	0.00780287	0.001125	9			19.5923	0.00501608	0.000753173	9	0.00957986	0.000832062	9
	19.6533	0.00731902	0.000719965	9	0.00675832	0.000586269	9			19.6533	0.010728	0.002117	9	0.0077663	0.001126	9			19.6533	0.00498546	0.000750066	9	0.00950625	0.000833462	9
	19.7144	0.00726956	0.000700936	9	0.00672812	0.000582321	9			19.7144	0.010782	0.002141	9	0.0077235	0.001118	9			19.7144	0.00495289	0.000749696	9	0.00943716	0.000835821	9
	19.7754	0.00722487	0.000686694	9	0.00670019	0.00058132	9			19.7754	0.010802	0.002135	9	0.00769465	0.001099	9			19.7754	0.00490663	0.00075152	9	0.00940083	0.000839585	9
	19.8364	0.00719259	0.000688016	9	0.00666649	0.000573392	9			19.8364	0.010755	0.002116	9	0.00771056	0.001071	9			19.8364	0.00485319	0.000752875	9	0.00937671	0.000842855	9
	19.8975	0.00716159	0.000695685	9	0.00662508	0.000560222	9			19.8975	0.01068	0.002104	9	0.00775621	0.001046	9			19.8975	0.00480967	0.000752921	9	0.0093303	0.000843291	9
	19.9585	0.00712073	0.000691758	9	0.00659095	0.000555432	9			19.9585	0.010625	0.002111	9	0.00776686	0.001035	9			19.9585	0.00478071	0.00075505	9	0.00926832	0.000841596	9
	20.0195	0.00707855	0.000677316	9	0.00657461	0.000564119	9			20.0195	0.010568	0.002123	9	0.00770591	0.001028	9			20.0195	0.00475359	0.000762475	9	0.00922851	0.000839938	9
	20.0806	0.00705374	0.000673927	9	0.00656154	0.000573216	9			20.0806	0.01046	0.002116	9	0.00761586	0.001015	9			20.0806	0.00471725	0.000772472	9	0.00922044	0.000839668	9
	20.1416	0.00704885	0.000692098	9	0.00653148	0.000569009	9			20.1416	0.010302	0.00208	9	0.00756373	0.000997	9			20.1416	0.00467623	0.000778549	9	0.00920884	0.0008407	9
	20.2026	0.00704594	0.000714776	9	0.00648902	0.000556601	9			20.2026	0.010156	0.002022	9	0.00755648	0.000988	9			20.2026	0.00464096	0.00077878	9	0.00916357	0.000842617	9
	20.2637	0.00703032	0.000720863	9	0.00645432	0.00055089	9			20.2637	0.010067	0.001967	9	0.00754029	0.000995	9			20.2637	0.00461162	0.000777714	9	0.00909916	0.000844147	9
	20.3247	0.00700726	0.000714265	9	0.00642879	0.000553411	9			20.3247	0.010018	0.001927	9	0.00747294	0.001001	9			20.3247	0.00457966	0.000779002	9	0.00904791	0.000842304	9
	20.3857	0.00698814	0.000713491	9	0.00639358	0.000550821	9			20.3857	0.00997	0.001885	9	0.00736941	0.000993	9			20.3857	0.00454209	0.000780598	9	0.00901386	0.000835493	9
	20.4468	0.00697085	0.000721718	9	0.00634288	0.00053713	9			20.4468	0.009905	0.00183	9	0.00727773	0.000972	9			20.4468	0.00450609	0.000779507	9	0.0089774	0.000827468	9
	20.5078	0.00694583	0.000723604	9	0.00629597	0.0005236	9			20.5078	0.009831	0.001782	9	0.0072309	0.000961	9			20.5078	0.00447795	0.000777612	9	0.00893468	0.000824967	9
	20.5688	0.00691561	0.000711822	9	0.00626879	0.000523043	9			20.5689	0.009763	0.001772	9	0.00722452	0.00097	9			20.5688	0.00445357	0.000778507	9	0.00890405	0.000829832	9
	20.6299	0.00689317	0.000699438	9	0.00625309	0.000533642	9			20.6299	0.009725	0.001805	9	0.00722571	0.000983	9			20.6299	0.00442314	0.000780508	9	0.00889074	0.00083633	9
	20.6909	0.00688079	0.000698469	9	0.00623444	0.000543161	9			20.6909	0.009733	0.001848	9	0.00719978	0.000977	9			20.6909	0.00438279	0.000777948	9	0.00887037	0.000838701	9
	20.752	0.00686514	0.000703268	9	0.00621408	0.000545793	9			20.752	0.009768	0.001873	9	0.00713787	0.000954	9			20.752	0.0043386	0.000769827	9	0.00882117	0.000839272	9
	20.813	0.00683856	0.000702575	9	0.00619855	0.00054597	9			20.813	0.009771	0.00188	9	0.00706103	0.000941	9			20.813	0.0043001	0.000762651	9	0.00875745	0.000844061	9
	20.874	0.00681279	0.000699172	9	0.00618125	0.000547977	9			20.874	0.009703	0.001884	9	0.00699279	0.000948	9			20.874	0.00427104	0.000762624	9	0.00871301	0.00085271	9
	20.9351	0.00680283	0.000705565	9	0.00615285	0.000549794	9			20.9351	0.009595	0.001892	9	0.0069334	0.000955	9			20.9351	0.00424615	0.000768019	9	0.0086966	0.000857917	9
	20.9961	0.00680646	0.000722946	9	0.00612182	0.000548656	9			20.9961	0.009511	0.001902	9	0.0068696	0.000938	9			20.9961	0.00421656	0.000771804	9	0.00868084	0.000853934	9
	21.0571	0.00681003	0.000737917	9	0.00610509	0.00054698	9			21.0571	0.009475	0.001917	9	0.0068011	0.00091	9			21.0571	0.00417895	0.000769808	9	0.00863806	0.000844233	9
	21.1182	0.00680783	0.000741583	9	0.00610083	0.000548244	9			21.1182	0.009445	0.001942	9	0.00673984	0.000899	9			21.1182	0.00413882	0.000763781	9	0.00857419	0.000837382	9
	21.1792	0.00680338	0.000739671	9	0.00608944	0.000551539	9			21.1792	0.009381	0.001966	9	0.00668613	0.000913	9			21.1792	0.0041038	0.000757385	9	0.0085193	0.000837806	9
	21.2402	0.00679566	0.000741105	9	0.006063	0.000553091	9			21.2402	0.009301	0.001966	9	0.00662679	0.000924	9			21.2402	0.00407491	0.000752187	9	0.00849113	0.000843844	9
	21.3013	0.00677834	0.000746533	9	0.00603486	0.000550836	9			21.3013	0.009265	0.001944	9	0.00656201	0.000908	9			21.3013	0.00404694	0.000747805	9	0.00847751	0.000849801	9
	21.3623	0.00675382	0.000751556	9	0.00601462	0.000545301	9			21.3623	0.00931	0.001941	9	0.00651386	0.000886	9			21.3623	0.00401613	0.000743144	9	0.00845479	0.000849893	9
	21.4233	0.00673434	0.000754818	9	0.005992	0.000539317	9			21.4233	0.009403	0.001984	9	0.00649518	0.000893	9			21.4233	0.00398347	0.000737061	9	0.00841577	0.000843039	9
	21.4844	0.00672346	0.000756184	9	0.00595759	0.000537485	9			21.4844	0.009474	0.002044	9	0.00648528	0.000929	9			21.4844	0.00395053	0.000729767	9	0.00837469	0.000834295	9
	21.5454	0.00670713	0.000752932	9	0.00592483	0.000541986	9			21.5454	0.009459	0.002072	9	0.00645349	0.000957	9			21.5454	0.00391662	0.000724028	9	0.00834758	0.000830747	9
	21.6064	0.00667188	0.000744768	9	0.00591412	0.000548854	9			21.6064	0.009356	0.002055	9	0.00639748	0.000948	9			21.6064	0.00388199	0.00072295	9	0.00833433	0.000834511	9
	21.6675	0.00662472	0.00073806	9	0.0059229	0.000550838	9			21.6675	0.00922	0.002028	9	0.00633899	0.000917	9			21.6675	0.00384924	0.000725802	9	0.00832224	0.000841057	9
	21.7285	0.00658525	0.000739413	9	0.00592914	0.00054654	9			21.7285	0.00912	0.002028	9	0.00628625	0.000898	9			21.7285	0.00381857	0.000727768	9	0.0083029	0.000845138	9
	21.7896	0.00656172	0.000746584	9	0.00592184	0.000543001	9			21.7895	0.009079	0.00205	9	0.00622405	0.000901	9			21.7896	0.00378565	0.000725003	9	0.00827976	0.000846481	9
	21.8506	0.00654461	0.000751146	9	0.00590997	0.000546066	9			21.8506	0.009066	0.002067	9	0.00614692	0.000909	9			21.8506	0.00374826	0.000718637	9	0.00825895	0.000848352	9
	21.9116	0.0065226	0.000749186	9	0.00589981	0.00055023	9			21.9116	0.009037	0.002068	9	0.00608009	0.000903	9			21.9116	0.0037116	0.000712556	9	0.00823856	0.000851371	9
	21.9727	0.00649547	0.000745199	9	0.00588223	0.000544343	9			21.9727	0.008976	0.002061	9	0.00604987	0.000882	9			21.9727	0.00368191	0.000708926	9	0.0082113	0.000851766	9
	22.0337	0.00646928	0.000743679	9	0.00585111	0.000528087	9			22.0337	0.00889	0.002041	9	0.00604396	0.000859	9			22.0337	0.00365716	0.000707634	9	0.008175	0.000846283	9
	22.0947	0.00644691	0.00074223	9	0.00581909	0.000513927	9			22.0947	0.00878	0.001991	9	0.00602148	0.000842	9			22.0947	0.0036298	0.000708172	9	0.00813551	0.000836643	9
	22.1558	0.00642696	0.000737353	9	0.00580132	0.000512098	9			22.1558	0.008653	0.001914	9	0.00596143	0.000831	9			22.1558	0.00359769	0.000709361	9	0.00809883	0.000827961	9
	22.2168	0.00640591	0.000729268	9	0.00579277	0.000517653	9			22.2168	0.008537	0.001843	9	0.00588396	0.000821	9			22.2168	0.00356642	0.0007086	9	0.00806503	0.000822938	9
	22.2778	0.00637664	0.000718477	9	0.00577651	0.000517958	9			22.2778	0.008462	0.001813	9	0.00581899	0.000805	9			22.2778	0.00354074	0.000704704	9	0.00803229	0.000819864	9
	22.3389	0.00633086	0.000702904	9	0.00574907	0.000511163	9			22.3389	0.008416	0.001816	9	0.00577013	0.000784	9			22.3389	0.00351919	0.000700675	9	0.00800332	0.000816725	9
	22.3999	0.00627066	0.000683173	9	0.005722	0.00050689	9			22.3999	0.008356	0.001817	9	0.00572094	0.000768	9			22.3999	0.00349811	0.000699819	9	0.00798301	0.000815028	9
	22.4609	0.00621441	0.000667964	9	0.00569979	0.000509777	9			22.4609	0.008266	0.001801	9	0.00566494	0.000771	9			22.4609	0.00347547	0.000699387	9	0.00797002	0.000817402	9
	22.522	0.00618139	0.000666648	9	0.00567313	0.000511502	9			22.522	0.008187	0.001796	9	0.00561162	0.000784	9			22.522	0.00344941	0.000693288	9	0.00795529	0.000821757	9
	22.583	0.00616788	0.000675503	9	0.0056378	0.000504476	9			22.583	0.008161	0.001823	9	0.00556611	0.000784	9			22.583	0.00341873	0.000682555	9	0.00793138	0.000822664	9
	22.644	0.00614605	0.000677638	9	0.0056048	0.000494909	9			22.644	0.008173	0.001863	9	0.00552139	0.000759	9			22.644	0.00338732	0.00067689	9	0.00790021	0.000819365	9
	22.7051	0.00609207	0.000662243	9	0.0055833	0.000493699	9			22.7051	0.00816	0.001875	9	0.00547657	0.000727	9			22.7051	0.00336298	0.000681868	9	0.00786805	0.000817599	9
	22.7661	0.00601191	0.000637051	9	0.00556579	0.000500698	9			22.7661	0.008092	0.001852	9	0.00544706	0.000713	9			22.7661	0.00334808	0.000689804	9	0.00783472	0.000821684	9
	22.8271	0.00593403	0.000618693	9	0.00554188	0.000505756	9			22.8271	0.008009	0.001834	9	0.00544332	0.000723	9			22.8271	0.00333589	0.000689921	9	0.00779367	0.000827363	9
	22.8882	0.00587901	0.000613614	9	0.00551733	0.000503787	9			22.8882	0.007962	0.001849	9	0.00544782	0.000742	9			22.8882	0.00331972	0.00068413	9	0.00774417	0.000826622	9
	22.9492	0.00584261	0.000612783	9	0.00550508	0.000501257	9			22.9492	0.007958	0.00188	9	0.00542922	0.000747	9			22.9492	0.00330096	0.000683494	9	0.0076971	0.000819119	9
	23.0103	0.00580815	0.000606772	9	0.00550218	0.000503884	9			23.0102	0.007963	0.001896	9	0.00537974	0.000732	9			23.0103	0.00328381	0.000689965	9	0.00766318	0.000813122	9
	23.0713	0.00576777	0.000597277	9	0.00549147	0.000506685	9			23.0713	0.007952	0.001907	9	0.0053243	0.000711	9			23.0713	0.00326651	0.000691825	9	0.00763897	0.000813715	9
	23.1323	0.00572707	0.00059176	9	0.00546643	0.00050208	9			23.1323	0.00794	0.001948	9	0.00528722	0.000702	9			23.1323	0.00324452	0.000681238	9	0.00761168	0.000816632	9
	23.1934	0.00569346	0.000592093	9	0.00543959	0.000492184	9			23.1934	0.007953	0.002019	9	0.00526135	0.000711	9			23.1934	0.00321905	0.000666823	9	0.00757732	0.000816344	9
	23.2544	0.00566593	0.000592037	9	0.00542196	0.000486025	9			23.2544	0.007988	0.002077	9	0.00522173	0.000725	9			23.2544	0.00319516	0.0006612	9	0.00754553	0.00081453	9
	23.3154	0.00563696	0.000585906	9	0.00540756	0.000486365	9			23.3154	0.008018	0.002093	9	0.00516323	0.000727	9			23.3154	0.00317273	0.000663291	9	0.00752401	0.00081703	9
	23.3765	0.00560185	0.000576121	9	0.00538657	0.00048817	9			23.3765	0.008023	0.002091	9	0.00510902	0.000723	9			23.3765	0.00314701	0.00066206	9	0.00750627	0.000823789	9
	23.4375	0.00556557	0.000569569	9	0.00536343	0.000488118	9			23.4375	0.00801	0.002115	9	0.00507866	0.000727	9			23.4375	0.00311832	0.000654445	9	0.00748181	0.000829045	9
	23.4985	0.00553966	0.000569665	9	0.00535001	0.000488174	9			23.4985	0.007999	0.002167	9	0.00506246	0.000742	9			23.4985	0.00309351	0.000648668	9	0.00745256	0.000831414	9
	23.5596	0.00552908	0.000573438	9	0.00534598	0.000489563	9			23.5596	0.007993	0.002205	9	0.00503866	0.000751	9			23.5596	0.00307565	0.000649056	9	0.00743014	0.000835014	9
	23.6206	0.00552251	0.000575613	9	0.00533793	0.000489307	9			23.6206	0.007975	0.002207	9	0.00500682	0.000748	9			23.6206	0.00305895	0.000648603	9	0.00741814	0.00084042	9
	23.6816	0.00550242	0.000573721	9	0.00531816	0.000485244	9			23.6816	0.007937	0.002194	9	0.00498719	0.000748	9			23.6816	0.00303745	0.000641177	9	0.00740697	0.000842234	9
	23.7427	0.00546842	0.000569485	9	0.00529555	0.000481544	9			23.7427	0.007892	0.002202	9	0.00498887	0.000768	9			23.7427	0.00301328	0.000632334	9	0.00738791	0.000838433	9
	23.8037	0.00544266	0.00056664	9	0.00528531	0.000486766	9			23.8037	0.007857	0.002227	9	0.00499912	0.000802	9			23.8037	0.00299174	0.000630612	9	0.00736403	0.000835166	9
	23.8647	0.00544319	0.000566078	9	0.00529297	0.000504193	9			23.8648	0.007824	0.002233	9	0.00501007	0.000835	9			23.8647	0.00297293	0.000633962	9	0.00734251	0.000838806	9
	23.9258	0.00545773	0.000565263	9	0.00530959	0.000526578	9			23.9258	0.007775	0.002203	9	0.0050329	0.000867	9			23.9258	0.00295326	0.000633172	9	0.00732252	0.00084546	9
	23.9868	0.00545704	0.000561655	9	0.00531934	0.000542816	9			23.9868	0.007709	0.002165	9	0.00506618	0.000896	9			23.9868	0.00293263	0.000626401	9	0.00729782	0.000845294	9
	24.0479	0.00543264	0.000556165	9	0.00531242	0.000547885	9			24.0479	0.007654	0.002162	9	0.00506997	0.000904	9			24.0479	0.00291447	0.000621661	9	0.0072687	0.000837226	9
	24.1089	0.00540563	0.000552781	9	0.0052945	0.000546385	9			24.1089	0.007636	0.002201	9	0.00500613	0.00088	9			24.1089	0.00289948	0.000624111	9	0.00724411	0.000829533	9
	24.1699	0.0053947	0.000553943	9	0.00528239	0.000545815	9			24.1699	0.007644	0.002248	9	0.00490047	0.000849	9			24.1699	0.00288349	0.000628565	9	0.00723067	0.000828146	9
	24.231	0.00539295	0.000559061	9	0.00528491	0.000547553	9			24.231	0.007636	0.002262	9	0.00482588	0.000844	9			24.231	0.0028622	0.000627346	9	0.00722346	0.00083062	9
	24.292	0.00538639	0.000567013	9	0.0052896	0.000547193	9			24.292	0.007574	0.002229	9	0.00481213	0.000864	9			24.292	0.00283537	0.000620134	9	0.00720988	0.000831489	9
	24.353	0.00537924	0.000576745	9	0.00527575	0.00054389	9			24.353	0.007457	0.002165	9	0.0048096	0.000867	9			24.353	0.00280668	0.000612336	9	0.00718176	0.000829633	9
	24.4141	0.00538249	0.000585161	9	0.00524078	0.000543106	9			24.4141	0.007324	0.002094	9	0.00476643	0.000837	9			24.4141	0.0027812	0.000607409	9	0.00714312	0.000827252	9
	24.4751	0.00538766	0.000587689	9	0.0052044	0.000547951	9			24.4751	0.00722	0.002032	9	0.0047062	0.000812	9			24.4751	0.00276208	0.000604939	9	0.00710572	0.000825221	9
	24.5361	0.00537523	0.000583864	9	0.00518358	0.000554322	9			24.5361	0.007146	0.001977	9	0.00468676	0.000827	9			24.5361	0.00274772	0.000603896	9	0.00707649	0.000822505	9
	24.5972	0.00534729	0.000580901	9	0.00517361	0.000556041	9			24.5972	0.007062	0.001926	9	0.00470618	0.000861	9			24.5972	0.00273306	0.000603747	9	0.0070507	0.00081872	9
	24.6582	0.00532788	0.000585568	9	0.00516143	0.000554523	9			24.6582	0.006948	0.001883	9	0.00470686	0.000866	9			24.6582	0.00271564	0.000603206	9	0.00702056	0.000815462	9
	24.7192	0.00532604	0.000593879	9	0.00514863	0.000557303	9			24.7192	0.006845	0.001862	9	0.00467016	0.000843	9			24.7192	0.00269877	0.000601209	9	0.00698866	0.000814663	9
	24.7803	0.00532165	0.00059587	9	0.00514744	0.000565179	9			24.7803	0.006817	0.001869	9	0.004644	0.000836	9			24.7803	0.00268608	0.000599045	9	0.00696586	0.000816381	9
	24.8413	0.00529953	0.000590107	9	0.00515644	0.000570708	9			24.8413	0.006866	0.00189	9	0.00465465	0.000857	9			24.8413	0.002675	0.000598984	9	0.00695417	0.000818644	9
	24.9023	0.00527589	0.000587757	9	0.00515592	0.000569262	9			24.9023	0.006908	0.001896	9	0.00465011	0.000864	9			24.9023	0.00265939	0.000600798	9	0.00694082	0.000819882	9
	24.9634	0.00527095	0.000596536	9	0.00513327	0.000566338	9			24.9634	0.006859	0.001864	9	0.00457754	0.000829	9			24.9634	0.0026379	0.000601924	9	0.00691614	0.000821654	9
	25.0244	0.00527156	0.000607651	9	0.00510167	0.000570251	9			25.0244	0.006728	0.001795	9	0.00447628	0.000787	9			25.0244	0.00261539	0.000601228	9	0.00688892	0.000827047	9
	25.0854	0.00524811	0.000607029	9	0.00508319	0.000579127	9			25.0855	0.006593	0.001719	9	0.00443129	0.000784	9			25.0854	0.00259627	0.000600371	9	0.00687235	0.000835226	9
	25.1465	0.00520245	0.000594286	9	0.00507876	0.000583442	9			25.1465	0.00651	0.001664	9	0.00445018	0.000812	9			25.1465	0.00258081	0.000601284	9	0.00685964	0.000839998	9
	25.2075	0.00516994	0.000583282	9	0.005067	0.000578387	9			25.2075	0.006452	0.001637	9	0.00445193	0.000818	9			25.2075	0.00256847	0.000604289	9	0.00683082	0.000836768	9
	25.2686	0.00516968	0.000583699	9	0.00503385	0.000568726	9			25.2686	0.00636	0.001614	9	0.00438526	0.000789	9			25.2686	0.00256014	0.000609	9	0.00678554	0.00083005	9
	25.3296	0.00517899	0.000590952	9	0.00499216	0.000561149	9			25.3296	0.006216	0.001567	9	0.00429858	0.00077	9			25.3296	0.00255438	0.000614869	9	0.00675075	0.000830019	9
	25.3906	0.0051697	0.000595767	9	0.00496526	0.000555972	9			25.3906	0.006065	0.001493	9	0.00426562	0.000789	9			25.3906	0.00254541	0.000619929	9	0.00674466	0.000840208	9
	25.4517	0.00514791	0.000596744	9	0.00495675	0.000552119	9			25.4517	0.005971	0.001429	9	0.00428774	0.000825	9			25.4517	0.00252871	0.000621113	9	0.00674737	0.00085214	9
	25.5127	0.00513828	0.000598635	9	0.0049468	0.000551279	9			25.5127	0.005965	0.00142	9	0.00430953	0.000835	9			25.5127	0.00250678	0.000617524	9	0.00672533	0.000855792	9
	25.5737	0.0051428	0.000602037	9	0.0049193	0.000554211	9			25.5737	0.00602	0.001472	9	0.00430091	0.000822	9			25.5737	0.00248605	0.00061214	9	0.00667867	0.000851952	9
	25.6348	0.00513879	0.000602528	9	0.00488436	0.000557957	9			25.6348	0.006078	0.001544	9	0.00427824	0.000818	9			25.6348	0.00246905	0.000608528	9	0.00664336	0.000849722	9
	25.6958	0.00511377	0.000598207	9	0.00486688	0.000559028	9			25.6958	0.006082	0.001584	9	0.00425726	0.000834	9			25.6958	0.00245267	0.000606701	9	0.00664341	0.000854327	9
	25.7568	0.00508154	0.000593018	9	0.00487541	0.000559313	9			25.7568	0.006022	0.001574	9	0.0042307	0.00085	9			25.7568	0.00243423	0.00060389	9	0.00665957	0.000861369	9
	25.8179	0.00506078	0.00059217	9	0.0048903	0.000562426	9			25.8179	0.005933	0.001541	9	0.00419696	0.000855	9			25.8179	0.00241594	0.000599039	9	0.00665677	0.000863647	9
	25.8789	0.00505401	0.00059636	9	0.00488592	0.000566205	9			25.8789	0.005859	0.001519	9	0.0041756	0.000862	9			25.8789	0.0024023	0.000594668	9	0.00662939	0.000860213	9
	25.9399	0.00505247	0.00060122	9	0.00485959	0.000564858	9			25.9399	0.005815	0.001512	9	0.00417978	0.000878	9			25.9399	0.00239438	0.000593809	9	0.00660288	0.000856582	9
	26.001	0.00504863	0.000601265	9	0.00483248	0.000559593	9			26.001	0.005787	0.001501	9	0.00419414	0.000895	9			26.001	0.0023882	0.000596445	9	0.00659492	0.000858016	9
	26.062	0.00503784	0.000593649	9	0.00482287	0.000557817	9			26.062	0.005756	0.001481	9	0.00419247	0.000897	9			26.062	0.00237841	0.000599412	9	0.0065929	0.000863238	9
	26.123	0.00501892	0.000581205	9	0.00482583	0.000561577	9			26.123	0.005717	0.001461	9	0.00416472	0.00089	9			26.123	0.002363	0.000599002	9	0.00657511	0.000865396	9
	26.1841	0.0050005	0.000572347	9	0.0048233	0.000565465	9			26.1841	0.005672	0.001448	9	0.00412075	0.000883	9			26.1841	0.00234418	0.000593561	9	0.00654102	0.000859694	9
	26.2451	0.00499702	0.000573122	9	0.00480918	0.0005646	9			26.2451	0.00562	0.001439	9	0.00408071	0.000879	9			26.2451	0.00232566	0.000584594	9	0.00650928	0.000849571	9
	26.3062	0.00501034	0.000579684	9	0.00479632	0.000564019	9			26.3061	0.005565	0.001425	9	0.00406468	0.000883	9			26.3062	0.00230978	0.000575945	9	0.00649078	0.000843816	9
	26.3672	0.00502384	0.000583518	9	0.0047976	0.000571959	9			26.3672	0.005521	0.001414	9	0.00407419	0.000898	9			26.3672	0.00229708	0.000571217	9	0.0064765	0.000845862	9
	26.4282	0.00502334	0.000583956	9	0.00480773	0.000586074	9			26.4282	0.0055	0.001412	9	0.00407888	0.000907	9			26.4282	0.0022866	0.000570863	9	0.00645427	0.0008495	9
	26.4893	0.00501572	0.000589382	9	0.00481024	0.000594781	9			26.4893	0.005502	0.001416	9	0.00404237	0.000883	9			26.4893	0.00227521	0.000571492	9	0.00642753	0.000848162	9
	26.5503	0.00501563	0.000603658	9	0.00479949	0.000591474	9			26.5503	0.005515	0.001421	9	0.00397218	0.000832	9			26.5503	0.00225841	0.000568448	9	0.00640952	0.000844218	9
	26.6113	0.00502159	0.000617147	9	0.00478766	0.000584073	9			26.6113	0.005528	0.001432	9	0.00392173	0.000798	9			26.6113	0.00223469	0.000559529	9	0.00640299	0.000844495	9
	26.6724	0.0050201	0.000618085	9	0.00478872	0.000584564	9			26.6724	0.005538	0.001458	9	0.0039239	0.000811	9			26.6724	0.00220873	0.000546785	9	0.00639565	0.000848538	9
	26.7334	0.00500923	0.00060916	9	0.0048024	0.000595114	9			26.7334	0.005541	0.001489	9	0.00394153	0.000843	9			26.7334	0.00218768	0.000535081	9	0.00637766	0.000848724	9
	26.7944	0.00500028	0.000603599	9	0.00481839	0.000608243	9			26.7944	0.005519	0.001497	9	0.00391151	0.000844	9			26.7944	0.00217394	0.000528543	9	0.00635551	0.000842561	9
	26.8555	0.00499511	0.000606238	9	0.00483086	0.000616046	9			26.8555	0.005452	0.001464	9	0.00382751	0.000808	9			26.8555	0.002164	0.000527631	9	0.0063423	0.000836884	9
	26.9165	0.0049809	0.000607959	9	0.0048411	0.000616945	9			26.9165	0.005349	0.001401	9	0.00374642	0.000776	9			26.9165	0.0021544	0.000529133	9	0.00633819	0.000837093	9
	26.9775	0.00495487	0.00060229	9	0.00484783	0.000613353	9			26.9775	0.005249	0.001342	9	0.00371223	0.000773	9			26.9775	0.0021453	0.000529281	9	0.00632861	0.000838329	9
	27.0386	0.00493626	0.000595536	9	0.00484402	0.00060754	9			27.0386	0.005194	0.00131	9	0.00370707	0.000776	9			27.0386	0.00213723	0.000527361	9	0.00630221	0.000833292	9
	27.0996	0.00493932	0.000594591	9	0.0048269	0.000601507	9			27.0996	0.005178	0.001303	9	0.00368962	0.000761	9			27.0996	0.00212795	0.00052594	9	0.00626413	0.000823919	9
	27.1606	0.00494765	0.000594401	9	0.00480562	0.000597767	9			27.1606	0.005154	0.001303	9	0.00365191	0.000736	9			27.1606	0.00211517	0.000527174	9	0.00622862	0.000818573	9
	27.2217	0.00493477	0.000586034	9	0.00479409	0.000598102	9			27.2217	0.005087	0.001288	9	0.00361324	0.000718	9			27.2217	0.00209971	0.000529384	9	0.0062031	0.000819737	9
	27.2827	0.00490357	0.000574047	9	0.0047975	0.000601647	9			27.2827	0.004997	0.001255	9	0.00357723	0.000702	9			27.2827	0.0020832	0.000528284	9	0.00618365	0.000821486	9
	27.3438	0.00488371	0.000572619	9	0.00480824	0.000605549	9			27.3438	0.004934	0.001222	9	0.00352763	0.000671	9			27.3438	0.00206537	0.000522024	9	0.00616376	0.000819859	9
	27.4048	0.00488879	0.000584201	9	0.00481373	0.00060777	9			27.4048	0.004933	0.001228	9	0.00346313	0.000634	9			27.4048	0.00204689	0.000514219	9	0.00614212	0.000818436	9
	27.4658	0.00489769	0.000594251	9	0.00480715	0.000608564	9			27.4658	0.004977	0.001284	9	0.00340615	0.000616	9			27.4658	0.00203212	0.000510951	9	0.00612145	0.000821236	9
	27.5269	0.00488718	0.000592079	9	0.00479336	0.000609091	9			27.5269	0.005017	0.00135	9	0.00336814	0.000619	9			27.5269	0.00202431	0.000514579	9	0.00610298	0.000825368	9
	27.5879	0.00486483	0.000586663	9	0.00478507	0.000609794	9			27.5879	0.005016	0.001367	9	0.00332878	0.000615	9			27.5879	0.00201942	0.000521131	9	0.00608506	0.000825088	9
	27.6489	0.00485375	0.000592067	9	0.00478926	0.000610663	9			27.6489	0.00498	0.001332	9	0.00326487	0.00059	9			27.6489	0.00200981	0.00052437	9	0.0060667	0.000819642	9
	27.71	0.00485635	0.000605196	9	0.00479608	0.000611873	9			27.71	0.004946	0.001307	9	0.00318702	0.000561	9			27.71	0.00199442	0.000522265	9	0.00605012	0.000813306	9
	27.771	0.00485333	0.000609369	9	0.0047874	0.000613878	9			27.771	0.004944	0.001342	9	0.00313009	0.000552	9			27.771	0.00198005	0.000518669	9	0.00603728	0.000808927	9
	27.832	0.00483592	0.000599387	9	0.00476054	0.000616115	9			27.832	0.004957	0.001412	9	0.00311176	0.000565	9			27.832	0.00197167	0.000518383	9	0.00602425	0.000805197	9
	27.8931	0.00481917	0.000589963	9	0.00473619	0.000616389	9			27.8931	0.004949	0.001447	9	0.00311441	0.000582	9			27.8931	0.00196614	0.000521703	9	0.00600291	0.000800441	9
	27.9541	0.0048176	0.000593823	9	0.00473454	0.000613865	9			27.9541	0.00491	0.001425	9	0.00310843	0.00059	9			27.9541	0.00195809	0.000524963	9	0.00597176	0.000795834	9
	28.0151	0.00482293	0.000603872	9	0.00474857	0.000610541	9			28.0151	0.004873	0.001394	9	0.00308255	0.000584	9			28.0151	0.00194765	0.000525829	9	0.00594185	0.000794015	9
	28.0762	0.00481762	0.000604709	9	0.0047523	0.000608816	9			28.0762	0.004855	0.001392	9	0.00304871	0.000571	9			28.0762	0.00193862	0.000525872	9	0.00592546	0.000795694	9
	28.1372	0.00480183	0.000595803	9	0.00473374	0.000608598	9			28.1372	0.004831	0.0014	9	0.00302455	0.000557	9			28.1372	0.00193134	0.000527144	9	0.00591905	0.000798378	9
	28.1982	0.00479301	0.000592447	9	0.00470659	0.000606598	9			28.1982	0.004775	0.001385	9	0.00301492	0.000547	9			28.1982	0.00192196	0.000528313	9	0.00590501	0.000798119	9
	28.2593	0.00480015	0.000602411	9	0.00468737	0.000601652	9			28.2593	0.004714	0.001365	9	0.00300743	0.000541	9			28.2593	0.00190826	0.000526713	9	0.00587333	0.000792803	9
	28.3203	0.00481083	0.000613758	9	0.00467493	0.000597971	9			28.3203	0.004703	0.001379	9	0.00298569	0.00053	9			28.3203	0.00189313	0.000523305	9	0.00583459	0.000784563	9
	28.3813	0.00480916	0.000612	9	0.00466054	0.000599831	9			28.3814	0.004735	0.001418	9	0.00294973	0.000515	9			28.3813	0.00188145	0.000522287	9	0.00580592	0.0007783	9
	28.4424	0.00479822	0.000601834	9	0.00464656	0.000605469	9			28.4424	0.004744	0.001431	9	0.0029209	0.000507	9			28.4424	0.00187507	0.000524894	9	0.00579033	0.000776279	9
	28.5034	0.00479596	0.000601406	9	0.00464215	0.000607898	9			28.5034	0.0047	0.0014	9	0.00292033	0.000515	9			28.5034	0.00187118	0.000526471	9	0.00577783	0.000776414	9
	28.5645	0.0048106	0.000616465	9	0.00464591	0.000604383	9			28.5645	0.004654	0.001374	9	0.00294466	0.000535	9			28.5645	0.00186492	0.000522296	9	0.00576231	0.000775871	9
	28.6255	0.00482928	0.000631308	9	0.00464576	0.000600887	9			28.6255	0.004664	0.001401	9	0.00297169	0.000555	9			28.6255	0.00185391	0.000514551	9	0.00574689	0.000774366	9
	28.6865	0.00483454	0.000628478	9	0.00463492	0.000603598	9			28.6865	0.004704	0.001455	9	0.00298921	0.000572	9			28.6865	0.00184068	0.000510043	9	0.00573334	0.000773355	9
	28.7476	0.00482583	0.000611731	9	0.00461787	0.000610075	9			28.7476	0.004702	0.001467	9	0.00300541	0.000591	9			28.7476	0.0018297	0.000511342	9	0.00571757	0.000773059	9
	28.8086	0.00481771	0.00060128	9	0.00460054	0.000612411	9			28.8086	0.004643	0.001422	9	0.0030267	0.00061	9			28.8086	0.00182218	0.000513741	9	0.00569891	0.00077298	9
	28.8696	0.00481941	0.000607945	9	0.00458429	0.000609441	9			28.8696	0.004583	0.001371	9	0.00304015	0.00062	9			28.8696	0.00181523	0.000512233	9	0.00568436	0.000772958	9
	28.9307	0.00482504	0.000621972	9	0.0045704	0.000608429	9			28.9307	0.004552	0.001356	9	0.00303086	0.000615	9			28.9307	0.00180664	0.000508248	9	0.00567819	0.000772318	9
	28.9917	0.0048256	0.000627665	9	0.0045612	0.000612895	9			28.9917	0.004517	0.001358	9	0.0030081	0.000602	9			28.9917	0.0017978	0.000506653	9	0.00567452	0.00076988	9
	29.0527	0.00482139	0.000622047	9	0.00455427	0.000616909	9			29.0527	0.004446	0.001341	9	0.00299757	0.000593	9			29.0527	0.00179035	0.000508298	9	0.00566609	0.000766201	9
	29.1138	0.00481708	0.000614495	9	0.00454382	0.000614287	9			29.1138	0.004365	0.001306	9	0.00300958	0.000597	9			29.1138	0.00178284	0.000509366	9	0.00565431	0.000764592	9
	29.1748	0.00481214	0.000612011	9	0.0045302	0.000608953	9			29.1748	0.004321	0.00128	9	0.00303023	0.000611	9			29.1748	0.00177327	0.000507574	9	0.00564378	0.000766624	9
	29.2358	0.0048051	0.000612393	9	0.00451925	0.000609096	9			29.2358	0.004308	0.001276	9	0.00304537	0.000629	9			29.2358	0.00176311	0.00050499	9	0.00563246	0.000768274	9
	29.2969	0.0048018	0.000611582	9	0.00450995	0.000613949	9			29.2969	0.004292	0.001277	9	0.00305712	0.000643	9			29.2969	0.00175516	0.000503502	9	0.00561592	0.000764694	9
	29.3579	0.00480758	0.000610313	9	0.00449365	0.000614019	9			29.3579	0.004279	0.001278	9	0.00306938	0.000651	9			29.3579	0.00174854	0.000501112	9	0.00559761	0.000757857	9
	29.4189	0.00481337	0.000610832	9	0.0044714	0.000605604	9			29.4189	0.004306	0.001293	9	0.00307181	0.000653	9			29.4189	0.00173957	0.000495525	9	0.00558522	0.000754207	9
	29.48	0.00480297	0.000612026	9	0.00446032	0.000598932	9			29.48	0.004358	0.001321	9	0.0030521	0.000655	9			29.48	0.00172755	0.000489147	9	0.00557778	0.000755074	9
	29.541	0.00477627	0.000611389	9	0.00447232	0.000604094	9			29.541	0.004363	0.001326	9	0.00301794	0.000655	9			29.541	0.00171601	0.000486884	9	0.00556637	0.000755052	9
	29.6021	0.00475167	0.000610458	9	0.00449534	0.000616493	9			29.602	0.004274	0.00128	9	0.0029926	0.000653	9			29.6021	0.00170747	0.000489345	9	0.00554828	0.000750899	9
	29.6631	0.00473995	0.000613079	9	0.00450889	0.000623413	9			29.6631	0.004145	0.001203	9	0.00298872	0.000652	9			29.6631	0.00169973	0.000491254	9	0.00553118	0.000747331	9
	29.7241	0.00472989	0.000618913	9	0.00451203	0.000621126	9			29.7241	0.004065	0.00115	9	0.00299633	0.000658	9			29.7241	0.0016889	0.000487645	9	0.00552015	0.000749793	9
	29.7852	0.00470958	0.000623385	9	0.00451982	0.000619117	9			29.7852	0.004052	0.001147	9	0.00299733	0.000669	9			29.7852	0.00167421	0.000479547	9	0.0055098	0.000755646	9
	29.8462	0.00468885	0.00062327	9	0.00453482	0.000624396	9			29.8462	0.004042	0.001166	9	0.00298314	0.000673	9			29.8462	0.00165852	0.000472203	9	0.00549461	0.000758307	9
	29.9072	0.00468393	0.000621091	9	0.00454134	0.000631186	9			29.9072	0.003987	0.001163	9	0.00295589	0.000659	9			29.9072	0.00164552	0.000469121	9	0.00547901	0.000756818	9
	29.9683	0.00468938	0.000621645	9	0.00453295	0.000631916	9			29.9683	0.003918	0.001133	9	0.00292053	0.000637	9			29.9683	0.00163695	0.00046921	9	0.00546938	0.000755803	9
