# Supplementary material for: Microglia facilitate and stabilize the response to general anesthesia via modulating the neuronal network in a brain region-specific manner
Source: eLife. 2023 Dec 22;12:RP92252. doi: 10.7554/eLife.92252 (PMC10746144; doi:10.7554/eLife.92252)
Supplement: Figure 4—source data 3. [file elife-92252-fig4-data3.xlsx]

## Sheet: Figure 4E
		RMS of EMG
		D7			D21
	Time after pentobarbital injection	Mean	SEM	N	Mean	SEM	N
	-1198.75	0.076575	0.012252	9	0.075905	0.014573	9
	-1197.5	0.076615	0.011342	9	0.076703	0.01465	9
	-1196.25	0.076993	0.011097	9	0.076054	0.013634	9
	-1195	0.077438	0.011121	9	0.074423	0.013357	9
	-1193.75	0.079134	0.011217	9	0.072489	0.013436	9
	-1192.5	0.079073	0.011287	9	0.072128	0.015288	9
	-1191.25	0.075884	0.010875	9	0.073095	0.015922	9
	-1190	0.075717	0.010637	9	0.078199	0.016791	9
	-1188.75	0.075333	0.010624	9	0.079602	0.017086	9
	-1187.5	0.076173	0.011339	9	0.075523	0.01512	9
	-1186.25	0.077162	0.011311	9	0.073791	0.014608	9
	-1185	0.075591	0.011352	9	0.075726	0.01603	9
	-1183.75	0.077452	0.011556	9	0.074891	0.015788	9
	-1182.5	0.078478	0.011804	9	0.073474	0.015801	9
	-1181.25	0.078683	0.012236	9	0.073042	0.015508	9
	-1180	0.080388	0.012932	9	0.074666	0.015556	9
	-1178.75	0.082514	0.013584	9	0.07922	0.016941	9
	-1177.5	0.083347	0.01423	9	0.083685	0.018668	9
	-1176.25	0.083321	0.014366	9	0.084003	0.019035	9
	-1175	0.083852	0.01368	9	0.084664	0.019078	9
	-1173.75	0.082536	0.013396	9	0.085546	0.019246	9
	-1172.5	0.082945	0.013379	9	0.085744	0.019071	9
	-1171.25	0.08446	0.013884	9	0.084997	0.018859	9
	-1170	0.085018	0.014096	9	0.080755	0.018563	9
	-1168.75	0.084862	0.014109	9	0.081328	0.019735	9
	-1167.5	0.083003	0.013642	9	0.081312	0.01999	9
	-1166.25	0.081076	0.013815	9	0.08153	0.019854	9
	-1165	0.080945	0.013763	9	0.080502	0.018722	9
	-1163.75	0.081031	0.012301	9	0.079005	0.01835	9
	-1162.5	0.080742	0.011389	9	0.07773	0.018026	9
	-1161.25	0.079559	0.010617	9	0.077319	0.018219	9
	-1160	0.078094	0.009785	9	0.07573	0.018393	9
	-1158.75	0.075582	0.009362	9	0.071774	0.018019	9
	-1157.5	0.075128	0.008911	9	0.077548	0.02366	9
	-1156.25	0.074039	0.008799	9	0.078032	0.024718	9
	-1155	0.072458	0.008697	9	0.078286	0.025012	9
	-1153.75	0.073124	0.008565	9	0.077575	0.024929	9
	-1152.5	0.073946	0.008302	9	0.075665	0.024453	9
	-1151.25	0.07321	0.008629	9	0.075256	0.024163	9
	-1150	0.07424	0.009231	9	0.074611	0.023681	9
	-1148.75	0.076028	0.009628	9	0.073478	0.021992	9
	-1147.5	0.075989	0.009487	9	0.072813	0.021556	9
	-1146.25	0.076399	0.009413	9	0.074889	0.020982	9
	-1145	0.076248	0.009395	9	0.074457	0.020626	9
	-1143.75	0.073748	0.009173	9	0.078283	0.021216	9
	-1142.5	0.072996	0.00916	9	0.079567	0.021389	9
	-1141.25	0.072434	0.009459	9	0.080642	0.021485	9
	-1140	0.072803	0.009553	9	0.080588	0.021537	9
	-1138.75	0.075103	0.009677	9	0.083005	0.024932	9
	-1137.5	0.07268	0.009564	9	0.074271	0.019573	9
	-1136.25	0.073667	0.009829	9	0.077906	0.021134	9
	-1135	0.074034	0.009902	9	0.077954	0.02145	9
	-1133.75	0.073287	0.009878	9	0.080781	0.021591	9
	-1132.5	0.07247	0.010253	9	0.080404	0.021405	9
	-1131.25	0.070751	0.010149	9	0.081062	0.021574	9
	-1130	0.069055	0.009517	9	0.081983	0.02186	9
	-1128.75	0.066956	0.009139	9	0.0817	0.022008	9
	-1127.5	0.066434	0.009002	9	0.081697	0.022235	9
	-1126.25	0.067261	0.009107	9	0.080837	0.022569	9
	-1125	0.066306	0.009294	9	0.079886	0.023022	9
	-1123.75	0.067401	0.009408	9	0.079047	0.023377	9
	-1122.5	0.067094	0.009657	9	0.081685	0.024886	9
	-1121.25	0.072856	0.011503	9	0.080651	0.024706	9
	-1120	0.073388	0.012152	9	0.079974	0.024599	9
	-1118.75	0.071393	0.01226	9	0.080203	0.021765	9
	-1117.5	0.071356	0.012937	9	0.079872	0.02085	9
	-1116.25	0.071551	0.012785	9	0.075868	0.017995	9
	-1115	0.07271	0.012676	9	0.074553	0.017421	9
	-1113.75	0.0735	0.012384	9	0.071787	0.017428	9
	-1112.5	0.072714	0.012068	9	0.072512	0.018324	9
	-1111.25	0.076258	0.011857	9	0.072635	0.018315	9
	-1110	0.077947	0.010905	9	0.075156	0.018069	9
	-1108.75	0.079674	0.010821	9	0.076144	0.018314	9
	-1107.5	0.081739	0.011172	9	0.076558	0.018158	9
	-1106.25	0.081247	0.011407	9	0.077102	0.017933	9
	-1105	0.080649	0.011344	9	0.077921	0.01822	9
	-1103.75	0.081304	0.010852	9	0.075431	0.01747	9
	-1102.5	0.081765	0.010584	9	0.071618	0.017073	9
	-1101.25	0.076558	0.009805	9	0.071141	0.016974	9
	-1100	0.07501	0.010843	9	0.070591	0.016846	9
	-1098.75	0.075581	0.010849	9	0.066605	0.014876	9
	-1097.5	0.075595	0.010742	9	0.06495	0.014235	9
	-1096.25	0.077972	0.012511	9	0.063449	0.013662	9
	-1095	0.07806	0.012427	9	0.06342	0.013726	9
	-1093.75	0.077425	0.012793	9	0.062859	0.013461	9
	-1092.5	0.079412	0.013248	9	0.061134	0.01291	9
	-1091.25	0.076623	0.013349	9	0.060145	0.012755	9
	-1090	0.074832	0.014419	9	0.057713	0.012469	9
	-1088.75	0.072707	0.014472	9	0.05702	0.012326	9
	-1087.5	0.071815	0.014625	9	0.056278	0.012504	9
	-1086.25	0.071256	0.014858	9	0.056324	0.012954	9
	-1085	0.073007	0.01491	9	0.057181	0.013417	9
	-1083.75	0.074632	0.01519	9	0.057471	0.013878	9
	-1082.5	0.074435	0.015309	9	0.055108	0.012539	9
	-1081.25	0.074692	0.014888	9	0.057314	0.013162	9
	-1080	0.074859	0.014248	9	0.061573	0.014908	9
	-1078.75	0.074647	0.014114	9	0.063037	0.01482	9
	-1077.5	0.078363	0.013623	9	0.064475	0.015305	9
	-1076.25	0.077539	0.012009	9	0.065018	0.015693	9
	-1075	0.077744	0.011849	9	0.067102	0.018071	9
	-1073.75	0.08144	0.012183	9	0.06881	0.01969	9
	-1072.5	0.085108	0.013564	9	0.070837	0.021387	9
	-1071.25	0.087333	0.014965	9	0.071508	0.022138	9
	-1070	0.088359	0.015338	9	0.071772	0.022283	9
	-1068.75	0.088842	0.015344	9	0.07508	0.025424	9
	-1067.5	0.097483	0.021851	9	0.077218	0.027585	9
	-1066.25	0.099493	0.023391	9	0.077895	0.027629	9
	-1065	0.098444	0.023408	9	0.07886	0.026869	9
	-1063.75	0.096696	0.023692	9	0.077692	0.026505	9
	-1062.5	0.096556	0.023641	9	0.078245	0.026672	9
	-1061.25	0.100004	0.024375	9	0.079289	0.026333	9
	-1060	0.100052	0.024716	9	0.07822	0.025685	9
	-1058.75	0.099407	0.024843	9	0.078431	0.025971	9
	-1057.5	0.098347	0.024429	9	0.080133	0.025557	9
	-1056.25	0.097174	0.024266	9	0.08154	0.025747	9
	-1055	0.096129	0.024333	9	0.080791	0.024183	9
	-1053.75	0.091388	0.024453	9	0.079707	0.022972	9
	-1052.5	0.087692	0.02269	9	0.077344	0.021327	9
	-1051.25	0.086095	0.021551	9	0.076956	0.020645	9
	-1050	0.08508	0.021415	9	0.076568	0.020455	9
	-1048.75	0.085011	0.02165	9	0.072234	0.01714	9
	-1047.5	0.072592	0.015495	9	0.069171	0.014809	9
	-1046.25	0.066926	0.01413	9	0.074282	0.017227	9
	-1045	0.068396	0.015159	9	0.075524	0.017671	9
	-1043.75	0.067136	0.014781	9	0.075774	0.017757	9
	-1042.5	0.066687	0.014927	9	0.076721	0.017733	9
	-1041.25	0.062087	0.012636	9	0.075112	0.018139	9
	-1040	0.061012	0.012025	9	0.074258	0.017807	9
	-1038.75	0.061457	0.011556	9	0.074069	0.017397	9
	-1037.5	0.060716	0.010722	9	0.071948	0.016961	9
	-1036.25	0.061957	0.01063	9	0.070463	0.016443	9
	-1035	0.061766	0.01087	9	0.072786	0.017568	9
	-1033.75	0.063142	0.011667	9	0.072862	0.018072	9
	-1032.5	0.064163	0.012502	9	0.073342	0.018299	9
	-1031.25	0.063092	0.012847	9	0.073714	0.018381	9
	-1030	0.061498	0.013375	9	0.076946	0.018657	9
	-1028.75	0.059176	0.013581	9	0.076604	0.018516	9
	-1027.5	0.059472	0.013729	9	0.076416	0.018631	9
	-1026.25	0.060345	0.013398	9	0.070573	0.015944	9
	-1025	0.059391	0.012181	9	0.070191	0.016091	9
	-1023.75	0.060427	0.011952	9	0.071605	0.016527	9
	-1022.5	0.061437	0.011866	9	0.082739	0.021679	9
	-1021.25	0.062088	0.011968	9	0.08305	0.022355	9
	-1020	0.064189	0.012697	9	0.08228	0.022421	9
	-1018.75	0.06435	0.012854	9	0.083069	0.022807	9
	-1017.5	0.065253	0.012954	9	0.082726	0.022873	9
	-1016.25	0.066099	0.013283	9	0.084141	0.023258	9
	-1015	0.067864	0.01363	9	0.081761	0.022476	9
	-1013.75	0.067369	0.013459	9	0.08325	0.022571	9
	-1012.5	0.068048	0.013919	9	0.084743	0.022891	9
	-1011.25	0.068478	0.014289	9	0.08509	0.023006	9
	-1010	0.068309	0.014083	9	0.083351	0.022274	9
	-1008.75	0.069065	0.014411	9	0.084106	0.022852	9
	-1007.5	0.072474	0.0163	9	0.084756	0.023335	9
	-1006.25	0.072532	0.016649	9	0.084393	0.023177	9
	-1005	0.074099	0.017794	9	0.082667	0.023031	9
	-1003.75	0.074594	0.018523	9	0.080705	0.022888	9
	-1002.5	0.074579	0.018583	9	0.068941	0.016774	9
	-1001.25	0.074733	0.018901	9	0.066394	0.015785	9
	-1000	0.072253	0.01879	9	0.067496	0.015315	9
	-998.75	0.072707	0.018909	9	0.069052	0.016104	9
	-997.5	0.072472	0.018795	9	0.071972	0.017001	9
	-996.25	0.083836	0.029042	9	0.077396	0.01985	9
	-995	0.084776	0.030073	9	0.08086	0.022667	9
	-993.75	0.085272	0.030761	9	0.078789	0.022726	9
	-992.5	0.0841	0.030332	9	0.077031	0.022412	9
	-991.25	0.083585	0.030089	9	0.07635	0.022431	9
	-990	0.083282	0.0301	9	0.078089	0.024277	9
	-988.75	0.083094	0.029877	9	0.082018	0.029299	9
	-987.5	0.080991	0.028421	9	0.080776	0.029183	9
	-986.25	0.084149	0.027489	9	0.081276	0.029288	9
	-985	0.083116	0.027045	9	0.080558	0.029109	9
	-983.75	0.084062	0.026741	9	0.081554	0.029191	9
	-982.5	0.084964	0.026556	9	0.08285	0.029629	9
	-981.25	0.086693	0.026278	9	0.083285	0.029622	9
	-980	0.087533	0.026352	9	0.084604	0.030111	9
	-978.75	0.086119	0.026707	9	0.081606	0.029868	9
	-977.5	0.08573	0.027156	9	0.081449	0.029425	9
	-976.25	0.072075	0.016457	9	0.078117	0.02628	9
	-975	0.068284	0.014549	9	0.075468	0.023307	9
	-973.75	0.066133	0.013369	9	0.075336	0.022612	9
	-972.5	0.065682	0.013525	9	0.075499	0.022656	9
	-971.25	0.065435	0.013579	9	0.075455	0.022318	9
	-970	0.064563	0.013604	9	0.073734	0.020487	9
	-968.75	0.064606	0.013768	9	0.061875	0.014957	9
	-967.5	0.065859	0.01455	9	0.060807	0.014919	9
	-966.25	0.069492	0.015506	9	0.066676	0.016613	9
	-965	0.069616	0.016405	9	0.068876	0.018005	9
	-963.75	0.069542	0.016813	9	0.06893	0.017897	9
	-962.5	0.068742	0.016571	9	0.068146	0.017605	9
	-961.25	0.068498	0.016159	9	0.067844	0.017556	9
	-960	0.070158	0.016357	9	0.067012	0.017422	9
	-958.75	0.070591	0.016717	9	0.06989	0.017012	9
	-957.5	0.070567	0.016774	9	0.06931	0.016377	9
	-956.25	0.071495	0.016466	9	0.072379	0.016113	9
	-955	0.074951	0.017464	9	0.071835	0.016322	9
	-953.75	0.076358	0.018072	9	0.074168	0.017223	9
	-952.5	0.076458	0.018095	9	0.074553	0.017038	9
	-951.25	0.078196	0.018751	9	0.074101	0.016999	9
	-950	0.078958	0.018914	9	0.072983	0.01679	9
	-948.75	0.079349	0.019074	9	0.073013	0.016966	9
	-947.5	0.07856	0.01865	9	0.073653	0.017565	9
	-946.25	0.076798	0.016698	9	0.071541	0.01478	9
	-945	0.075222	0.016207	9	0.073942	0.014226	9
	-943.75	0.07426	0.016389	9	0.074876	0.014543	9
	-942.5	0.073967	0.016192	9	0.075328	0.014269	9
	-941.25	0.074041	0.015416	9	0.078325	0.014746	9
	-940	0.072466	0.014725	9	0.078614	0.014877	9
	-938.75	0.071618	0.014538	9	0.07769	0.014871	9
	-937.5	0.069948	0.014273	9	0.080243	0.015417	9
	-936.25	0.06772	0.013928	9	0.078823	0.015734	9
	-935	0.064327	0.012427	9	0.079103	0.01575	9
	-933.75	0.062162	0.011827	9	0.076758	0.015426	9
	-932.5	0.062933	0.012133	9	0.076316	0.01545	9
	-931.25	0.062622	0.011982	9	0.076612	0.015557	9
	-930	0.063055	0.012235	9	0.077058	0.015628	9
	-928.75	0.062147	0.011952	9	0.076426	0.015316	9
	-927.5	0.061172	0.012023	9	0.07482	0.014828	9
	-926.25	0.05881	0.011965	9	0.074936	0.014659	9
	-925	0.057853	0.011972	9	0.071772	0.013152	9
	-923.75	0.055684	0.011605	9	0.070847	0.012629	9
	-922.5	0.056878	0.011678	9	0.07065	0.012798	9
	-921.25	0.056221	0.012055	9	0.067809	0.012089	9
	-920	0.055216	0.011888	9	0.065443	0.011465	9
	-918.75	0.055001	0.011486	9	0.063341	0.011044	9
	-917.5	0.055865	0.011565	9	0.060341	0.009811	9
	-916.25	0.057306	0.01157	9	0.061572	0.010724	9
	-915	0.05883	0.011444	9	0.060361	0.010554	9
	-913.75	0.059527	0.011238	9	0.05918	0.010325	9
	-912.5	0.060318	0.011311	9	0.059353	0.010841	9
	-911.25	0.058308	0.010802	9	0.059843	0.011748	9
	-910	0.05764	0.010747	9	0.062774	0.013254	9
	-908.75	0.058219	0.011164	9	0.068293	0.014766	9
	-907.5	0.059622	0.011231	9	0.070772	0.015502	9
	-906.25	0.061974	0.011397	9	0.069724	0.015482	9
	-905	0.062583	0.011607	9	0.068907	0.015579	9
	-903.75	0.065678	0.011675	9	0.070203	0.016494	9
	-902.5	0.066577	0.01092	9	0.070587	0.016594	9
	-901.25	0.068637	0.011125	9	0.076378	0.017178	9
	-900	0.070021	0.011574	9	0.077167	0.017192	9
	-898.75	0.072743	0.012352	9	0.079511	0.017537	9
	-897.5	0.075784	0.012695	9	0.079514	0.017308	9
	-896.25	0.077498	0.012822	9	0.078202	0.016212	9
	-895	0.077494	0.012727	9	0.080526	0.016878	9
	-893.75	0.077464	0.012872	9	0.082221	0.017568	9
	-892.5	0.075823	0.012664	9	0.083513	0.018085	9
	-891.25	0.076096	0.012445	9	0.087928	0.020698	9
	-890	0.075985	0.012215	9	0.087136	0.020305	9
	-888.75	0.075585	0.011963	9	0.083388	0.019977	9
	-887.5	0.074728	0.011954	9	0.085687	0.023401	9
	-886.25	0.078364	0.013748	9	0.087749	0.025598	9
	-885	0.079169	0.013874	9	0.088845	0.025952	9
	-883.75	0.077097	0.013223	9	0.088766	0.025166	9
	-882.5	0.076365	0.013428	9	0.088402	0.025363	9
	-881.25	0.075985	0.012862	9	0.083893	0.025447	9
	-880	0.076124	0.012794	9	0.085852	0.025868	9
	-878.75	0.075181	0.012547	9	0.084172	0.025792	9
	-877.5	0.073236	0.012878	9	0.084906	0.026285	9
	-876.25	0.07149	0.012707	9	0.087552	0.027342	9
	-875	0.071357	0.012825	9	0.086182	0.027569	9
	-873.75	0.07197	0.013391	9	0.087986	0.027029	9
	-872.5	0.072191	0.013457	9	0.086673	0.026606	9
	-871.25	0.072807	0.013939	9	0.083704	0.023468	9
	-870	0.073762	0.014437	9	0.083515	0.022595	9
	-868.75	0.073717	0.014601	9	0.082421	0.022177	9
	-867.5	0.074662	0.014738	9	0.077513	0.018687	9
	-866.25	0.069926	0.012847	9	0.074065	0.016109	9
	-865	0.067762	0.012981	9	0.073352	0.01596	9
	-863.75	0.067992	0.013251	9	0.076525	0.018294	9
	-862.5	0.067957	0.013504	9	0.081984	0.019471	9
	-861.25	0.067596	0.013933	9	0.09223	0.024662	9
	-860	0.06727	0.013758	9	0.089206	0.025812	9
	-858.75	0.067527	0.0135	9	0.092385	0.027962	9
	-857.5	0.067239	0.013026	9	0.093016	0.027747	9
	-856.25	0.067767	0.0133	9	0.08996	0.02702	9
	-855	0.066958	0.013214	9	0.090023	0.02714	9
	-853.75	0.065804	0.012853	9	0.088995	0.027624	9
	-852.5	0.066572	0.013182	9	0.08978	0.027737	9
	-851.25	0.065935	0.013138	9	0.090936	0.027949	9
	-850	0.064993	0.01257	9	0.093118	0.028482	9
	-848.75	0.065323	0.012533	9	0.094001	0.028954	9
	-847.5	0.066266	0.011893	9	0.094161	0.028701	9
	-846.25	0.071271	0.013124	9	0.094902	0.028612	9
	-845	0.077407	0.012877	9	0.095095	0.028649	9
	-843.75	0.07706	0.012735	9	0.092412	0.027115	9
	-842.5	0.076397	0.012479	9	0.091174	0.026102	9
	-841.25	0.075205	0.012147	9	0.081595	0.020716	9
	-840	0.074248	0.01174	9	0.080905	0.020295	9
	-838.75	0.073304	0.011559	9	0.076586	0.020137	9
	-837.5	0.073655	0.011629	9	0.074344	0.020182	9
	-836.25	0.073543	0.011499	9	0.074878	0.02117	9
	-835	0.074397	0.011567	9	0.073827	0.020781	9
	-833.75	0.075213	0.011516	9	0.074421	0.019998	9
	-832.5	0.076192	0.011774	9	0.074841	0.019268	9
	-831.25	0.075132	0.011737	9	0.073676	0.018481	9
	-830	0.07443	0.01181	9	0.071738	0.017126	9
	-828.75	0.074771	0.011954	9	0.071572	0.017305	9
	-827.5	0.075512	0.012224	9	0.072119	0.017361	9
	-826.25	0.072379	0.010558	9	0.072754	0.016842	9
	-825	0.067657	0.010295	9	0.071931	0.016275	9
	-823.75	0.068762	0.010683	9	0.072033	0.016149	9
	-822.5	0.068765	0.010855	9	0.069905	0.014431	9
	-821.25	0.073233	0.01225	9	0.070774	0.014985	9
	-820	0.073734	0.012531	9	0.071126	0.015566	9
	-818.75	0.072808	0.01243	9	0.085201	0.022154	9
	-817.5	0.071003	0.012229	9	0.088983	0.023338	9
	-816.25	0.070851	0.01252	9	0.089961	0.023317	9
	-815	0.072185	0.013175	9	0.09151	0.022929	9
	-813.75	0.072231	0.01331	9	0.090514	0.02289	9
	-812.5	0.070487	0.012984	9	0.090916	0.022839	9
	-811.25	0.072539	0.013585	9	0.091328	0.022792	9
	-810	0.075346	0.013878	9	0.091337	0.022675	9
	-808.75	0.07754	0.014124	9	0.091302	0.022002	9
	-807.5	0.077669	0.014637	9	0.091313	0.021809	9
	-806.25	0.078254	0.015518	9	0.092019	0.022325	9
	-805	0.077745	0.015469	9	0.093237	0.022475	9
	-803.75	0.0779	0.01521	9	0.09462	0.022803	9
	-802.5	0.078653	0.015215	9	0.094518	0.022966	9
	-801.25	0.07589	0.013612	9	0.09227	0.023168	9
	-800	0.077694	0.013893	9	0.090077	0.023287	9
	-798.75	0.07838	0.014075	9	0.109266	0.04157	9
	-797.5	0.079057	0.013925	9	0.108506	0.04227	9
	-796.25	0.079282	0.013633	9	0.111473	0.042531	9
	-795	0.07724	0.012973	9	0.11365	0.042114	9
	-793.75	0.078311	0.013246	9	0.116022	0.04173	9
	-792.5	0.080531	0.013663	9	0.116357	0.041726	9
	-791.25	0.081412	0.014138	9	0.117651	0.041547	9
	-790	0.079107	0.014089	9	0.119533	0.041301	9
	-788.75	0.078696	0.013868	9	0.119932	0.041273	9
	-787.5	0.077119	0.013176	9	0.121019	0.041327	9
	-786.25	0.07606	0.013056	9	0.119339	0.041388	9
	-785	0.076927	0.013998	9	0.119126	0.042308	9
	-783.75	0.077446	0.014441	9	0.11806	0.042588	9
	-782.5	0.077872	0.014859	9	0.118273	0.042692	9
	-781.25	0.078733	0.015105	9	0.117631	0.042919	9
	-780	0.077829	0.014666	9	0.116653	0.043152	9
	-778.75	0.080347	0.016088	9	0.088704	0.019472	9
	-777.5	0.080779	0.01647	9	0.083043	0.018308	9
	-776.25	0.079859	0.016239	9	0.078199	0.015749	9
	-775	0.08587	0.015191	9	0.077389	0.014404	9
	-773.75	0.084028	0.014884	9	0.077327	0.013296	9
	-772.5	0.082663	0.014056	9	0.076484	0.012935	9
	-771.25	0.081199	0.013792	9	0.076138	0.012745	9
	-770	0.083354	0.014422	9	0.073597	0.012494	9
	-768.75	0.083556	0.01402	9	0.07239	0.012495	9
	-767.5	0.084715	0.01448	9	0.071342	0.011949	9
	-766.25	0.083762	0.014528	9	0.070522	0.012052	9
	-765	0.082902	0.014025	9	0.066652	0.010544	9
	-763.75	0.082633	0.013695	9	0.065066	0.009814	9
	-762.5	0.083492	0.013903	9	0.064395	0.009131	9
	-761.25	0.083396	0.013659	9	0.066398	0.009023	9
	-760	0.084189	0.013731	9	0.066404	0.008919	9
	-758.75	0.082271	0.012867	9	0.065227	0.007744	9
	-757.5	0.082659	0.012847	9	0.067513	0.008652	9
	-756.25	0.0851	0.012885	9	0.068065	0.009404	9
	-755	0.084873	0.012992	9	0.069116	0.010274	9
	-753.75	0.085486	0.012917	9	0.06794	0.010667	9
	-752.5	0.085226	0.012892	9	0.068312	0.010634	9
	-751.25	0.084794	0.012946	9	0.067614	0.01074	9
	-750	0.083859	0.013047	9	0.069516	0.010389	9
	-748.75	0.082975	0.013216	9	0.077633	0.012716	9
	-747.5	0.081023	0.012754	9	0.077457	0.01292	9
	-746.25	0.08166	0.012293	9	0.07818	0.013103	9
	-745	0.082623	0.012138	9	0.077681	0.013065	9
	-743.75	0.082404	0.012099	9	0.077203	0.012997	9
	-742.5	0.082796	0.012458	9	0.076928	0.013407	9
	-741.25	0.082815	0.012766	9	0.073329	0.014732	9
	-740	0.087637	0.015649	9	0.072622	0.015124	9
	-738.75	0.08668	0.016658	9	0.073893	0.014843	9
	-737.5	0.086365	0.01681	9	0.072484	0.014896	9
	-736.25	0.085292	0.016662	9	0.071341	0.01459	9
	-735	0.082226	0.016117	9	0.070504	0.014263	9
	-733.75	0.082095	0.016559	9	0.070917	0.014362	9
	-732.5	0.081985	0.016731	9	0.071255	0.014469	9
	-731.25	0.082167	0.015775	9	0.071426	0.014245	9
	-730	0.08161	0.015019	9	0.071263	0.014551	9
	-728.75	0.08149	0.01475	9	0.065483	0.01191	9
	-727.5	0.082672	0.014528	9	0.066704	0.012085	9
	-726.25	0.083388	0.014486	9	0.066505	0.011929	9
	-725	0.086549	0.01198	9	0.067956	0.012285	9
	-723.75	0.086033	0.011567	9	0.07197	0.012802	9
	-722.5	0.082947	0.011195	9	0.074861	0.013745	9
	-721.25	0.081117	0.011279	9	0.075145	0.013717	9
	-720	0.077161	0.006992	9	0.075559	0.013852	9
	-718.75	0.077654	0.00592	9	0.072732	0.013407	9
	-717.5	0.07925	0.006165	9	0.070246	0.01312	9
	-716.25	0.079874	0.006645	9	0.069547	0.013026	9
	-715	0.081964	0.007832	9	0.069676	0.013129	9
	-713.75	0.082868	0.007958	9	0.069443	0.012781	9
	-712.5	0.083424	0.007838	9	0.068093	0.01244	9
	-711.25	0.083806	0.008103	9	0.06765	0.012161	9
	-710	0.087843	0.010018	9	0.068005	0.011474	9
	-708.75	0.089056	0.010942	9	0.066188	0.011059	9
	-707.5	0.089299	0.011757	9	0.063495	0.01093	9
	-706.25	0.089079	0.012522	9	0.063006	0.010835	9
	-705	0.089019	0.014617	9	0.064654	0.011201	9
	-703.75	0.090492	0.015054	9	0.065744	0.012476	9
	-702.5	0.091659	0.015125	9	0.064321	0.012062	9
	-701.25	0.094862	0.01588	9	0.064067	0.011915	9
	-700	0.09194	0.016858	9	0.064677	0.011572	9
	-698.75	0.090527	0.016129	9	0.065123	0.011834	9
	-697.5	0.089211	0.015495	9	0.071905	0.017611	9
	-696.25	0.08867	0.015372	9	0.077286	0.020554	9
	-695	0.087342	0.014722	9	0.078972	0.020379	9
	-693.75	0.086692	0.014628	9	0.079421	0.020531	9
	-692.5	0.086338	0.015205	9	0.080425	0.020655	9
	-691.25	0.08588	0.015478	9	0.081002	0.020671	9
	-690	0.082723	0.014065	9	0.080476	0.0211	9
	-688.75	0.083677	0.013895	9	0.081893	0.02082	9
	-687.5	0.083135	0.0136	9	0.084571	0.020762	9
	-686.25	0.082425	0.013102	9	0.085313	0.020955	9
	-685	0.079031	0.012266	9	0.085426	0.020091	9
	-683.75	0.077079	0.01186	9	0.082702	0.018445	9
	-682.5	0.076258	0.011244	9	0.084052	0.017885	9
	-681.25	0.073461	0.010009	9	0.086631	0.018134	9
	-680	0.072552	0.009953	9	0.087288	0.018512	9
	-678.75	0.072364	0.010124	9	0.0888	0.01902	9
	-677.5	0.072471	0.00972	9	0.083856	0.015284	9
	-676.25	0.072267	0.009488	9	0.077326	0.012713	9
	-675	0.071611	0.009558	9	0.075086	0.012775	9
	-673.75	0.070821	0.008845	9	0.073468	0.012758	9
	-672.5	0.06968	0.008414	9	0.072311	0.012964	9
	-671.25	0.070109	0.008408	9	0.074868	0.013787	9
	-670	0.071008	0.008802	9	0.075857	0.013792	9
	-668.75	0.068284	0.007689	9	0.077772	0.01498	9
	-667.5	0.068002	0.007878	9	0.075233	0.014565	9
	-666.25	0.067686	0.007844	9	0.074201	0.014085	9
	-665	0.070175	0.008082	9	0.073849	0.014189	9
	-663.75	0.075081	0.009274	9	0.07377	0.014355	9
	-662.5	0.077848	0.010293	9	0.07277	0.013725	9
	-661.25	0.078171	0.010912	9	0.072089	0.013915	9
	-660	0.077687	0.010821	9	0.06942	0.013688	9
	-658.75	0.077694	0.010948	9	0.066017	0.012967	9
	-657.5	0.07863	0.011933	9	0.063889	0.012517	9
	-656.25	0.078244	0.012227	9	0.064756	0.012536	9
	-655	0.07813	0.012763	9	0.065298	0.012617	9
	-653.75	0.077809	0.013158	9	0.067277	0.01249	9
	-652.5	0.077986	0.012993	9	0.067315	0.012492	9
	-651.25	0.077904	0.012692	9	0.066131	0.011849	9
	-650	0.075889	0.011904	9	0.064155	0.011455	9
	-648.75	0.078313	0.011236	9	0.06372	0.009875	9
	-647.5	0.078857	0.010975	9	0.065538	0.010372	9
	-646.25	0.078824	0.010587	9	0.066898	0.010813	9
	-645	0.078157	0.010284	9	0.066585	0.010888	9
	-643.75	0.075506	0.009023	9	0.066934	0.011241	9
	-642.5	0.072204	0.00847	9	0.065953	0.011473	9
	-641.25	0.07143	0.007983	9	0.062705	0.010716	9
	-640	0.07511	0.00789	9	0.062835	0.010995	9
	-638.75	0.076452	0.008035	9	0.062364	0.011301	9
	-637.5	0.07541	0.007149	9	0.065012	0.012097	9
	-636.25	0.075023	0.007169	9	0.067431	0.012673	9
	-635	0.074257	0.00716	9	0.076001	0.017789	9
	-633.75	0.075212	0.007176	9	0.078271	0.021013	9
	-632.5	0.07478	0.007265	9	0.078028	0.020901	9
	-631.25	0.075376	0.007752	9	0.077041	0.020613	9
	-630	0.077675	0.008578	9	0.077479	0.020631	9
	-628.75	0.077118	0.008831	9	0.079862	0.021871	9
	-627.5	0.076776	0.008841	9	0.080573	0.022618	9
	-626.25	0.076395	0.009078	9	0.081293	0.02276	9
	-625	0.074564	0.009262	9	0.081835	0.024437	9
	-623.75	0.0725	0.009561	9	0.08323	0.025841	9
	-622.5	0.072711	0.009294	9	0.08796	0.02805	9
	-621.25	0.072539	0.009121	9	0.093021	0.0326	9
	-620	0.068966	0.009366	9	0.09436	0.033502	9
	-618.75	0.068172	0.009307	9	0.095042	0.033699	9
	-617.5	0.069529	0.008774	9	0.094687	0.033444	9
	-616.25	0.072501	0.008742	9	0.092633	0.033312	9
	-615	0.073576	0.008534	9	0.093324	0.028949	9
	-613.75	0.072946	0.007981	9	0.093732	0.027166	9
	-612.5	0.074452	0.008344	9	0.09566	0.027326	9
	-611.25	0.072826	0.007549	9	0.097136	0.027247	9
	-610	0.070337	0.007322	9	0.099799	0.02737	9
	-608.75	0.070319	0.007438	9	0.097183	0.026185	9
	-607.5	0.069152	0.007253	9	0.095922	0.025437	9
	-606.25	0.069805	0.007101	9	0.094876	0.025311	9
	-605	0.068912	0.006997	9	0.093873	0.024113	9
	-603.75	0.068718	0.007304	9	0.091741	0.023133	9
	-602.5	0.069797	0.007185	9	0.086601	0.02042	9
	-601.25	0.074101	0.006565	9	0.078204	0.014203	9
	-600	0.076072	0.006561	9	0.076491	0.012979	9
	-598.75	0.07844	0.006629	9	0.075957	0.012744	9
	-597.5	0.077373	0.006583	9	0.07496	0.012265	9
	-596.25	0.073937	0.006862	9	0.075316	0.012653	9
	-595	0.073422	0.006778	9	0.071902	0.013938	9
	-593.75	0.076828	0.006883	9	0.067935	0.013651	9
	-592.5	0.076955	0.006278	9	0.066227	0.013414	9
	-591.25	0.076999	0.006809	9	0.065783	0.013489	9
	-590	0.077372	0.006847	9	0.062717	0.012403	9
	-588.75	0.076136	0.006517	9	0.062083	0.012447	9
	-587.5	0.076425	0.00629	9	0.063232	0.012464	9
	-586.25	0.078019	0.005975	9	0.063503	0.012528	9
	-585	0.078987	0.005965	9	0.066967	0.012717	9
	-583.75	0.078681	0.00612	9	0.067747	0.012902	9
	-582.5	0.077948	0.005802	9	0.070999	0.014111	9
	-581.25	0.073907	0.00547	9	0.073503	0.01476	9
	-580	0.071296	0.005878	9	0.075317	0.015903	9
	-578.75	0.06797	0.005816	9	0.076321	0.016143	9
	-577.5	0.067305	0.005809	9	0.077019	0.016428	9
	-576.25	0.067346	0.005947	9	0.076213	0.015963	9
	-575	0.067506	0.006783	9	0.074778	0.015079	9
	-573.75	0.063767	0.007	9	0.074024	0.014386	9
	-572.5	0.062861	0.007581	9	0.074392	0.014987	9
	-571.25	0.065288	0.007932	9	0.083489	0.022544	9
	-570	0.065435	0.008502	9	0.084014	0.022804	9
	-568.75	0.064089	0.009046	9	0.083839	0.023103	9
	-567.5	0.064508	0.010163	9	0.082651	0.023883	9
	-566.25	0.060871	0.011029	9	0.081936	0.02386	9
	-565	0.060527	0.011005	9	0.077242	0.023853	9
	-563.75	0.061005	0.011472	9	0.076475	0.024303	9
	-562.5	0.062766	0.012339	9	0.074429	0.024258	9
	-561.25	0.065756	0.014172	9	0.074456	0.026246	9
	-560	0.066927	0.015125	9	0.072619	0.025866	9
	-558.75	0.068024	0.015811	9	0.072504	0.026225	9
	-557.5	0.069458	0.015553	9	0.075232	0.025944	9
	-556.25	0.070199	0.015296	9	0.077868	0.026528	9
	-555	0.069298	0.014862	9	0.079282	0.02641	9
	-553.75	0.070503	0.014722	9	0.080201	0.026382	9
	-552.5	0.071176	0.014544	9	0.080053	0.02574	9
	-551.25	0.070167	0.014885	9	0.071738	0.018374	9
	-550	0.074605	0.015653	9	0.070482	0.018698	9
	-548.75	0.077007	0.016421	9	0.070105	0.018413	9
	-547.5	0.076941	0.016336	9	0.069152	0.017558	9
	-546.25	0.078002	0.016252	9	0.068998	0.017393	9
	-545	0.078621	0.016567	9	0.069418	0.017199	9
	-543.75	0.081865	0.016126	9	0.069641	0.016678	9
	-542.5	0.081984	0.015674	9	0.068928	0.015792	9
	-541.25	0.08056	0.015131	9	0.067398	0.013618	9
	-540	0.079585	0.014939	9	0.06702	0.013097	9
	-538.75	0.079868	0.01498	9	0.066637	0.012407	9
	-537.5	0.080462	0.015357	9	0.065147	0.012284	9
	-536.25	0.081015	0.015508	9	0.063534	0.011233	9
	-535	0.082717	0.016039	9	0.063001	0.011322	9
	-533.75	0.085441	0.016604	9	0.063417	0.011135	9
	-532.5	0.085213	0.016862	9	0.064208	0.011325	9
	-531.25	0.083836	0.016994	9	0.063323	0.010894	9
	-530	0.081103	0.015536	9	0.065491	0.012598	9
	-528.75	0.080003	0.015218	9	0.068902	0.015579	9
	-527.5	0.081247	0.015915	9	0.070427	0.016531	9
	-526.25	0.08107	0.016004	9	0.074508	0.018666	9
	-525	0.082188	0.015298	9	0.075029	0.019443	9
	-523.75	0.079076	0.01497	9	0.07393	0.01925	9
	-522.5	0.078043	0.014556	9	0.074037	0.01912	9
	-521.25	0.077899	0.013501	9	0.074251	0.018645	9
	-520	0.078082	0.013298	9	0.074983	0.018715	9
	-518.75	0.075927	0.013319	9	0.074686	0.01959	9
	-517.5	0.073956	0.012855	9	0.073613	0.019307	9
	-516.25	0.073742	0.012567	9	0.071819	0.019208	9
	-515	0.072086	0.011553	9	0.071914	0.019341	9
	-513.75	0.068108	0.010034	9	0.071782	0.019514	9
	-512.5	0.06686	0.009635	9	0.071101	0.019528	9
	-511.25	0.067426	0.01026	9	0.075658	0.018824	9
	-510	0.066547	0.010013	9	0.075252	0.017225	9
	-508.75	0.065978	0.009624	9	0.073381	0.01507	9
	-507.5	0.063589	0.008781	9	0.073159	0.014234	9
	-506.25	0.063678	0.008504	9	0.068732	0.012708	9
	-505	0.062236	0.009313	9	0.069382	0.01342	9
	-503.75	0.064831	0.009877	9	0.071723	0.014522	9
	-502.5	0.065272	0.009924	9	0.077375	0.016226	9
	-501.25	0.064499	0.010289	9	0.079596	0.0176	9
	-500	0.063137	0.010303	9	0.08049	0.018442	9
	-498.75	0.063872	0.010611	9	0.07916	0.018971	9
	-497.5	0.06473	0.010779	9	0.0787	0.018987	9
	-496.25	0.064908	0.010887	9	0.079841	0.018855	9
	-495	0.066747	0.011719	9	0.079524	0.01872	9
	-493.75	0.067273	0.012043	9	0.078403	0.018611	9
	-492.5	0.067586	0.012338	9	0.078208	0.018716	9
	-491.25	0.065981	0.011761	9	0.079305	0.018296	9
	-490	0.068617	0.012001	9	0.080163	0.01845	9
	-488.75	0.071427	0.012519	9	0.08022	0.018405	9
	-487.5	0.070854	0.012208	9	0.079943	0.018653	9
	-486.25	0.071848	0.01267	9	0.080997	0.018781	9
	-485	0.071353	0.012683	9	0.080236	0.018399	9
	-483.75	0.069708	0.012583	9	0.077706	0.017676	9
	-482.5	0.068724	0.012528	9	0.072674	0.016027	9
	-481.25	0.069728	0.012693	9	0.067922	0.014022	9
	-480	0.071338	0.012262	9	0.065573	0.013519	9
	-478.75	0.071608	0.011461	9	0.064832	0.013815	9
	-477.5	0.07182	0.011451	9	0.066503	0.014366	9
	-476.25	0.072167	0.011088	9	0.067127	0.014297	9
	-475	0.072148	0.01028	9	0.067331	0.014573	9
	-473.75	0.072264	0.009876	9	0.068157	0.014856	9
	-472.5	0.074888	0.010712	9	0.068643	0.014773	9
	-471.25	0.075524	0.010842	9	0.068056	0.014607	9
	-470	0.072259	0.011035	9	0.068034	0.014042	9
	-468.75	0.068082	0.010862	9	0.066728	0.013558	9
	-467.5	0.068822	0.010699	9	0.065817	0.013377	9
	-466.25	0.067574	0.009897	9	0.066147	0.013317	9
	-465	0.067423	0.009676	9	0.065711	0.012613	9
	-463.75	0.066114	0.009399	9	0.066371	0.012395	9
	-462.5	0.065877	0.009446	9	0.066758	0.012377	9
	-461.25	0.064423	0.008828	9	0.065683	0.01228	9
	-460	0.062975	0.009145	9	0.064079	0.012505	9
	-458.75	0.063067	0.00892	9	0.062888	0.011728	9
	-457.5	0.062322	0.009056	9	0.062468	0.011447	9
	-456.25	0.061827	0.009095	9	0.061572	0.011576	9
	-455	0.062132	0.009093	9	0.062626	0.012091	9
	-453.75	0.063862	0.00949	9	0.063896	0.011769	9
	-452.5	0.062005	0.008104	9	0.065002	0.011802	9
	-451.25	0.064175	0.008771	9	0.064376	0.011586	9
	-450	0.067518	0.009738	9	0.063843	0.010717	9
	-448.75	0.069814	0.01015	9	0.068062	0.011961	9
	-447.5	0.070107	0.010079	9	0.071765	0.011873	9
	-446.25	0.071168	0.01011	9	0.072085	0.011098	9
	-445	0.072195	0.009987	9	0.072622	0.010976	9
	-443.75	0.073306	0.010076	9	0.072714	0.011381	9
	-442.5	0.074215	0.010063	9	0.071006	0.011541	9
	-441.25	0.074562	0.010095	9	0.071686	0.011992	9
	-440	0.075473	0.010704	9	0.070692	0.012013	9
	-438.75	0.076232	0.010825	9	0.070979	0.012081	9
	-437.5	0.077578	0.011125	9	0.070913	0.01148	9
	-436.25	0.077834	0.011761	9	0.071175	0.011092	9
	-435	0.077135	0.012067	9	0.06867	0.011164	9
	-433.75	0.076517	0.013151	9	0.068198	0.011061	9
	-432.5	0.078387	0.014898	9	0.067959	0.011263	9
	-431.25	0.078612	0.015583	9	0.068128	0.011533	9
	-430	0.075878	0.015249	9	0.072484	0.010963	9
	-428.75	0.074397	0.014871	9	0.072683	0.008997	9
	-427.5	0.075897	0.015721	9	0.072439	0.00919	9
	-426.25	0.076274	0.016568	9	0.069569	0.009703	9
	-425	0.075743	0.017107	9	0.06843	0.010874	9
	-423.75	0.076036	0.017834	9	0.067612	0.010948	9
	-422.5	0.076789	0.018255	9	0.069915	0.012435	9
	-421.25	0.07831	0.019061	9	0.071867	0.01424	9
	-420	0.082015	0.019393	9	0.073777	0.014776	9
	-418.75	0.082396	0.019161	9	0.078249	0.016285	9
	-417.5	0.082436	0.018996	9	0.083869	0.020147	9
	-416.25	0.081185	0.018784	9	0.083282	0.020574	9
	-415	0.081308	0.018452	9	0.083259	0.020698	9
	-413.75	0.081155	0.017747	9	0.082907	0.020581	9
	-412.5	0.080127	0.016303	9	0.081999	0.020357	9
	-411.25	0.07924	0.01532	9	0.082956	0.020602	9
	-410	0.083653	0.015581	9	0.081505	0.02007	9
	-408.75	0.085569	0.015695	9	0.079877	0.019489	9
	-407.5	0.084491	0.015091	9	0.077998	0.018848	9
	-406.25	0.083682	0.01444	9	0.077687	0.018811	9
	-405	0.08372	0.014163	9	0.079553	0.019694	9
	-403.75	0.082974	0.013906	9	0.080713	0.02067	9
	-402.5	0.082187	0.014066	9	0.077888	0.020229	9
	-401.25	0.080331	0.013672	9	0.073982	0.019815	9
	-400	0.075562	0.013079	9	0.071924	0.019794	9
	-398.75	0.075522	0.012886	9	0.071064	0.017482	9
	-397.5	0.075032	0.012582	9	0.062918	0.01388	9
	-396.25	0.079112	0.014574	9	0.063294	0.013879	9
	-395	0.080737	0.015648	9	0.063787	0.013825	9
	-393.75	0.079935	0.015454	9	0.064593	0.014094	9
	-392.5	0.079701	0.015864	9	0.065646	0.014683	9
	-391.25	0.08164	0.017636	9	0.063442	0.013659	9
	-390	0.078546	0.01755	9	0.062323	0.013407	9
	-388.75	0.077892	0.018537	9	0.061634	0.013393	9
	-387.5	0.07859	0.019336	9	0.062359	0.014138	9
	-386.25	0.079945	0.020518	9	0.062959	0.014151	9
	-385	0.078835	0.020884	9	0.062789	0.013656	9
	-383.75	0.079762	0.02143	9	0.061397	0.012793	9
	-382.5	0.080527	0.021816	9	0.065243	0.013589	9
	-381.25	0.080043	0.021594	9	0.066608	0.013754	9
	-380	0.080614	0.021801	9	0.066733	0.013677	9
	-378.75	0.079331	0.02183	9	0.065081	0.013317	9
	-377.5	0.078924	0.021849	9	0.064208	0.013313	9
	-376.25	0.077276	0.021454	9	0.063311	0.012926	9
	-375	0.074493	0.02149	9	0.063938	0.013028	9
	-373.75	0.075085	0.022194	9	0.063577	0.012703	9
	-372.5	0.073984	0.02147	9	0.063025	0.012282	9
	-371.25	0.070235	0.019988	9	0.064973	0.012467	9
	-370	0.07038	0.019688	9	0.066888	0.012779	9
	-368.75	0.0716	0.019284	9	0.068322	0.013264	9
	-367.5	0.07111	0.019111	9	0.067505	0.012503	9
	-366.25	0.069969	0.01963	9	0.067763	0.012486	9
	-365	0.071655	0.020301	9	0.065251	0.01105	9
	-363.75	0.071865	0.019231	9	0.06421	0.01091	9
	-362.5	0.073267	0.018241	9	0.061133	0.009759	9
	-361.25	0.074676	0.018395	9	0.058635	0.010565	9
	-360	0.074229	0.018048	9	0.059021	0.010947	9
	-358.75	0.076204	0.017825	9	0.05935	0.011191	9
	-357.5	0.077506	0.017544	9	0.062202	0.012203	9
	-356.25	0.077389	0.016696	9	0.063879	0.012868	9
	-355	0.076834	0.016101	9	0.064193	0.01303	9
	-353.75	0.076416	0.015482	9	0.068331	0.015445	9
	-352.5	0.076409	0.015386	9	0.069805	0.0168	9
	-351.25	0.07663	0.015328	9	0.068234	0.01669	9
	-350	0.076422	0.015086	9	0.067143	0.016803	9
	-348.75	0.075401	0.014572	9	0.0667	0.016537	9
	-347.5	0.0746	0.013696	9	0.067097	0.016967	9
	-346.25	0.072254	0.011926	9	0.067915	0.017228	9
	-345	0.07518	0.010679	9	0.068705	0.017541	9
	-343.75	0.077904	0.011329	9	0.068084	0.017694	9
	-342.5	0.077049	0.011392	9	0.068199	0.017784	9
	-341.25	0.077029	0.010886	9	0.067708	0.0175	9
	-340	0.076643	0.010694	9	0.067375	0.017695	9
	-338.75	0.077848	0.01123	9	0.06827	0.018494	9
	-337.5	0.077469	0.0114	9	0.06669	0.018022	9
	-336.25	0.076215	0.011068	9	0.065578	0.017616	9
	-335	0.076781	0.011088	9	0.064999	0.017235	9
	-333.75	0.075436	0.010772	9	0.060725	0.0148	9
	-332.5	0.076159	0.010527	9	0.058661	0.013095	9
	-331.25	0.076012	0.010439	9	0.05898	0.013047	9
	-330	0.07578	0.010159	9	0.058724	0.01256	9
	-328.75	0.074274	0.009805	9	0.058067	0.012293	9
	-327.5	0.07341	0.009968	9	0.058679	0.011678	9
	-326.25	0.075248	0.010978	9	0.060002	0.011505	9
	-325	0.070522	0.01094	9	0.059481	0.011034	9
	-323.75	0.067102	0.010373	9	0.059876	0.010904	9
	-322.5	0.066263	0.010007	9	0.059649	0.010664	9
	-321.25	0.066385	0.010014	9	0.062874	0.011917	9
	-320	0.067239	0.010369	9	0.062868	0.012009	9
	-318.75	0.065956	0.010345	9	0.059889	0.012074	9
	-317.5	0.068269	0.010731	9	0.060864	0.013034	9
	-316.25	0.069294	0.010537	9	0.06068	0.013332	9
	-315	0.07026	0.011176	9	0.060492	0.013505	9
	-313.75	0.070824	0.01151	9	0.060838	0.013694	9
	-312.5	0.071002	0.011825	9	0.061807	0.013971	9
	-311.25	0.070783	0.011756	9	0.063007	0.013839	9
	-310	0.070586	0.011709	9	0.063249	0.013674	9
	-308.75	0.070615	0.011867	9	0.063899	0.01371	9
	-307.5	0.071633	0.011797	9	0.063124	0.013537	9
	-306.25	0.068972	0.01107	9	0.064715	0.013632	9
	-305	0.068202	0.011276	9	0.065353	0.013892	9
	-303.75	0.068816	0.010811	9	0.068792	0.015076	9
	-302.5	0.068872	0.01072	9	0.07042	0.015496	9
	-301.25	0.069046	0.010591	9	0.068185	0.014591	9
	-300	0.069967	0.011573	9	0.067768	0.014445	9
	-298.75	0.067875	0.011477	9	0.067889	0.014371	9
	-297.5	0.064583	0.01104	9	0.065805	0.013455	9
	-296.25	0.063713	0.011119	9	0.065273	0.01334	9
	-295	0.061964	0.010283	9	0.065014	0.013514	9
	-293.75	0.061806	0.010313	9	0.064678	0.013386	9
	-292.5	0.062463	0.010202	9	0.063941	0.013307	9
	-291.25	0.062822	0.010058	9	0.066371	0.014081	9
	-290	0.062765	0.009989	9	0.067499	0.014792	9
	-288.75	0.061721	0.00957	9	0.069152	0.015833	9
	-287.5	0.060425	0.009516	9	0.069737	0.015941	9
	-286.25	0.062257	0.009691	9	0.068568	0.014488	9
	-285	0.06326	0.009734	9	0.067805	0.014187	9
	-283.75	0.062009	0.009642	9	0.064259	0.012831	9
	-282.5	0.06156	0.009671	9	0.062519	0.012245	9
	-281.25	0.062864	0.010175	9	0.063109	0.012351	9
	-280	0.061728	0.010181	9	0.064184	0.012072	9
	-278.75	0.062324	0.010424	9	0.065998	0.012026	9
	-277.5	0.062861	0.010686	9	0.067779	0.012701	9
	-276.25	0.06266	0.010695	9	0.068354	0.013104	9
	-275	0.063457	0.010842	9	0.069218	0.013298	9
	-273.75	0.063922	0.010359	9	0.071512	0.01432	9
	-272.5	0.06213	0.010086	9	0.07111	0.014023	9
	-271.25	0.061868	0.010231	9	0.069531	0.013398	9
	-270	0.062241	0.010395	9	0.06825	0.012969	9
	-268.75	0.063077	0.010734	9	0.066337	0.011818	9
	-267.5	0.062996	0.010644	9	0.066518	0.011274	9
	-266.25	0.061448	0.010595	9	0.066131	0.011548	9
	-265	0.059971	0.010622	9	0.067087	0.012523	9
	-263.75	0.06006	0.010732	9	0.067572	0.012869	9
	-262.5	0.059468	0.010574	9	0.067251	0.013068	9
	-261.25	0.057036	0.009995	9	0.066679	0.012902	9
	-260	0.056738	0.010075	9	0.065114	0.013668	9
	-258.75	0.055441	0.010237	9	0.064062	0.014074	9
	-257.5	0.053747	0.010066	9	0.062208	0.013375	9
	-256.25	0.052768	0.009769	9	0.062231	0.013546	9
	-255	0.051904	0.009654	9	0.074013	0.01535	9
	-253.75	0.053053	0.010411	9	0.078339	0.01455	9
	-252.5	0.05364	0.010379	9	0.078705	0.014705	9
	-251.25	0.052979	0.010101	9	0.079001	0.014703	9
	-250	0.05163	0.009792	9	0.080367	0.015154	9
	-248.75	0.05074	0.009437	9	0.082434	0.016443	9
	-247.5	0.050535	0.009395	9	0.082831	0.017078	9
	-246.25	0.049305	0.00938	9	0.08295	0.017217	9
	-245	0.051123	0.00994	9	0.081836	0.016553	9
	-243.75	0.050346	0.009856	9	0.081811	0.016418	9
	-242.5	0.050514	0.010024	9	0.081662	0.0163	9
	-241.25	0.052467	0.011141	9	0.081301	0.016314	9
	-240	0.049968	0.010221	9	0.080204	0.016227	9
	-238.75	0.049764	0.010413	9	0.078505	0.016056	9
	-237.5	0.050036	0.01064	9	0.078972	0.016164	9
	-236.25	0.050056	0.010613	9	0.079796	0.016527	9
	-235	0.049547	0.010648	9	0.068907	0.014653	9
	-233.75	0.046251	0.010389	9	0.06184	0.016131	9
	-232.5	0.046809	0.010119	9	0.066442	0.019349	9
	-231.25	0.04949	0.00975	9	0.067137	0.020728	9
	-230	0.050445	0.010113	9	0.066247	0.020494	9
	-228.75	0.050424	0.01006	9	0.063741	0.01926	9
	-227.5	0.050476	0.010245	9	0.062896	0.019034	9
	-226.25	0.050656	0.010334	9	0.062959	0.018859	9
	-225	0.049552	0.009995	9	0.063398	0.018868	9
	-223.75	0.05188	0.010516	9	0.06294	0.018665	9
	-222.5	0.053487	0.011215	9	0.063981	0.018404	9
	-221.25	0.051362	0.01096	9	0.066471	0.018127	9
	-220	0.05223	0.0113	9	0.067688	0.018109	9
	-218.75	0.052218	0.011579	9	0.06772	0.017962	9
	-217.5	0.053847	0.01209	9	0.067442	0.017622	9
	-216.25	0.054979	0.012212	9	0.067002	0.016697	9
	-215	0.055847	0.012379	9	0.066512	0.016251	9
	-213.75	0.056478	0.013139	9	0.065379	0.01531	9
	-212.5	0.056731	0.013685	9	0.059616	0.0116	9
	-211.25	0.058613	0.014575	9	0.054874	0.010722	9
	-210	0.058389	0.01463	9	0.053224	0.010705	9
	-208.75	0.058884	0.014825	9	0.053472	0.011144	9
	-207.5	0.059802	0.014933	9	0.053369	0.011984	9
	-206.25	0.063874	0.014595	9	0.053289	0.012204	9
	-205	0.063678	0.014394	9	0.052589	0.01226	9
	-203.75	0.062484	0.014149	9	0.05281	0.012327	9
	-202.5	0.06293	0.013725	9	0.05358	0.01239	9
	-201.25	0.062692	0.013884	9	0.055007	0.012961	9
	-200	0.062616	0.014058	9	0.054901	0.012734	9
	-198.75	0.062116	0.013965	9	0.055129	0.012966	9
	-197.5	0.060851	0.01355	9	0.082623	0.032694	9
	-196.25	0.05985	0.014102	9	0.087264	0.038332	9
	-195	0.059919	0.014416	9	0.087096	0.038498	9
	-193.75	0.059187	0.013738	9	0.086914	0.038548	9
	-192.5	0.058322	0.013291	9	0.086253	0.038638	9
	-191.25	0.056717	0.01246	9	0.08559	0.038473	9
	-190	0.056705	0.012284	9	0.086049	0.038618	9
	-188.75	0.05652	0.011937	9	0.085455	0.038593	9
	-187.5	0.05799	0.01117	9	0.089225	0.038131	9
	-186.25	0.05561	0.011157	9	0.092198	0.038268	9
	-185	0.05617	0.011276	9	0.093589	0.038321	9
	-183.75	0.057216	0.011144	9	0.093906	0.038306	9
	-182.5	0.059203	0.011227	9	0.095672	0.038357	9
	-181.25	0.059087	0.010732	9	0.094279	0.038604	9
	-180	0.060108	0.010635	9	0.095785	0.038713	9
	-178.75	0.062174	0.011255	9	0.096175	0.038645	9
	-177.5	0.062788	0.011366	9	0.078756	0.022843	9
	-176.25	0.062836	0.011429	9	0.066811	0.015313	9
	-175	0.062561	0.011415	9	0.066118	0.015227	9
	-173.75	0.062953	0.011543	9	0.064773	0.015145	9
	-172.5	0.06362	0.011764	9	0.064353	0.015164	9
	-171.25	0.062336	0.01146	9	0.064891	0.015374	9
	-170	0.061879	0.011708	9	0.066224	0.014753	9
	-168.75	0.062844	0.011887	9	0.067773	0.014623	9
	-167.5	0.061941	0.011729	9	0.066508	0.013506	9
	-166.25	0.060758	0.011516	9	0.064974	0.011878	9
	-165	0.060077	0.011439	9	0.090067	0.028208	9
	-163.75	0.058857	0.011089	9	0.10233	0.032855	9
	-162.5	0.055185	0.010946	9	0.104109	0.033867	9
	-161.25	0.053861	0.011205	9	0.108366	0.032541	9
	-160	0.050545	0.011239	9	0.108369	0.03215	9
	-158.75	0.047816	0.010713	9	0.108953	0.032246	9
	-157.5	0.047007	0.010316	9	0.108455	0.032326	9
	-156.25	0.045849	0.009743	9	0.108848	0.032579	9
	-155	0.04524	0.009448	9	0.111375	0.032615	9
	-153.75	0.045016	0.009286	9	0.111825	0.032602	9
	-152.5	0.043722	0.009265	9	0.112153	0.032574	9
	-151.25	0.044221	0.009239	9	0.112712	0.032553	9
	-150	0.04536	0.009187	9	0.115203	0.033291	9
	-148.75	0.045096	0.009154	9	0.115715	0.034013	9
	-147.5	0.046096	0.009108	9	0.114477	0.034245	9
	-146.25	0.047296	0.009804	9	0.114037	0.034138	9
	-145	0.046834	0.009717	9	0.095744	0.021668	9
	-143.75	0.047192	0.009569	9	0.080561	0.014637	9
	-142.5	0.046969	0.009236	9	0.073951	0.012739	9
	-141.25	0.04696	0.009187	9	0.068908	0.013421	9
	-140	0.047414	0.009309	9	0.067428	0.013746	9
	-138.75	0.047458	0.009408	9	0.066166	0.01322	9
	-137.5	0.04811	0.00977	9	0.065366	0.013226	9
	-136.25	0.048323	0.009804	9	0.069707	0.014069	9
	-135	0.047387	0.00947	9	0.072079	0.015865	9
	-133.75	0.048414	0.009847	9	0.07217	0.016261	9
	-132.5	0.051074	0.01181	9	0.071882	0.016248	9
	-131.25	0.050445	0.011907	9	0.07105	0.016009	9
	-130	0.049996	0.011821	9	0.06754	0.014105	9
	-128.75	0.050359	0.011542	9	0.064034	0.013415	9
	-127.5	0.050655	0.011648	9	0.064079	0.013787	9
	-126.25	0.050654	0.011691	9	0.062801	0.013915	9
	-125	0.05369	0.012252	9	0.063037	0.013834	9
	-123.75	0.052962	0.012738	9	0.062863	0.013861	9
	-122.5	0.052629	0.012884	9	0.063762	0.014324	9
	-121.25	0.05268	0.012888	9	0.064802	0.014245	9
	-120	0.05253	0.012754	9	0.065856	0.014219	9
	-118.75	0.053676	0.012971	9	0.067341	0.01468	9
	-117.5	0.055727	0.013337	9	0.068737	0.014769	9
	-116.25	0.057885	0.013867	9	0.065848	0.011817	9
	-115	0.059212	0.013996	9	0.060066	0.008037	9
	-113.75	0.058718	0.013984	9	0.058983	0.007692	9
	-112.5	0.05887	0.014333	9	0.05896	0.008099	9
	-111.25	0.059242	0.01462	9	0.058936	0.008889	9
	-110	0.059518	0.015096	9	0.056756	0.009259	9
	-108.75	0.059708	0.01526	9	0.056358	0.009788	9
	-107.5	0.059728	0.015328	9	0.054817	0.009683	9
	-106.25	0.060741	0.015657	9	0.055563	0.009877	9
	-105	0.059915	0.015165	9	0.054632	0.010156	9
	-103.75	0.060413	0.01547	9	0.0542	0.010183	9
	-102.5	0.061554	0.01556	9	0.054591	0.010549	9
	-101.25	0.062951	0.016149	9	0.053721	0.010275	9
	-100	0.064094	0.016248	9	0.05216	0.009612	9
	-98.75	0.065975	0.0156	9	0.050045	0.008656	9
	-97.5	0.06738	0.014522	9	0.049262	0.008115	9
	-96.25	0.066408	0.013873	9	0.049575	0.007934	9
	-95	0.067056	0.014088	9	0.052612	0.007601	9
	-93.75	0.067893	0.013715	9	0.056112	0.008211	9
	-92.5	0.065536	0.012436	9	0.056052	0.008015	9
	-91.25	0.066532	0.012588	9	0.056781	0.007665	9
	-90	0.066557	0.011885	9	0.062151	0.008379	9
	-88.75	0.066655	0.011739	9	0.062356	0.008341	9
	-87.5	0.066144	0.01163	9	0.062821	0.008468	9
	-86.25	0.06406	0.011148	9	0.063724	0.008963	9
	-85	0.063076	0.010876	9	0.064556	0.008927	9
	-83.75	0.063	0.010555	9	0.064893	0.009097	9
	-82.5	0.062896	0.01053	9	0.0624	0.009182	9
	-81.25	0.060791	0.009982	9	0.063192	0.009498	9
	-80	0.05991	0.010016	9	0.064412	0.009689	9
	-78.75	0.057558	0.00993	9	0.064647	0.009889	9
	-77.5	0.056739	0.010652	9	0.063972	0.010232	9
	-76.25	0.057536	0.011212	9	0.06331	0.010244	9
	-75	0.061093	0.014239	9	0.06185	0.009813	9
	-73.75	0.061088	0.014746	9	0.060087	0.009878	9
	-72.5	0.060578	0.014553	9	0.061567	0.010427	9
	-71.25	0.059111	0.014167	9	0.063138	0.011222	9
	-70	0.058086	0.014286	9	0.059238	0.011677	9
	-68.75	0.058248	0.01433	9	0.06067	0.012565	9
	-67.5	0.058448	0.014063	9	0.061964	0.013556	9
	-66.25	0.05883	0.013923	9	0.063502	0.01481	9
	-65	0.059415	0.013773	9	0.064136	0.016171	9
	-63.75	0.058836	0.013721	9	0.064312	0.016552	9
	-62.5	0.060282	0.013646	9	0.066073	0.016875	9
	-61.25	0.060139	0.013575	9	0.069636	0.017938	9
	-60	0.060304	0.013485	9	0.069959	0.018693	9
	-58.75	0.060631	0.013284	9	0.070406	0.018979	9
	-57.5	0.059518	0.012628	9	0.070625	0.019234	9
	-56.25	0.058342	0.012463	9	0.071792	0.019293	9
	-55	0.051968	0.009028	9	0.073075	0.019546	9
	-53.75	0.049113	0.008946	9	0.076537	0.021459	9
	-52.5	0.051837	0.011259	9	0.078205	0.023618	9
	-51.25	0.052448	0.011594	9	0.087729	0.031027	9
	-50	0.052091	0.011514	9	0.087632	0.031879	9
	-48.75	0.04993	0.011176	9	0.086336	0.031812	9
	-47.5	0.049424	0.011095	9	0.089261	0.03059	9
	-46.25	0.04978	0.010675	9	0.089395	0.029667	9
	-45	0.049673	0.010565	9	0.089817	0.029996	9
	-43.75	0.050423	0.010394	9	0.089813	0.029861	9
	-42.5	0.048255	0.010578	9	0.088642	0.029622	9
	-41.25	0.048569	0.010751	9	0.085797	0.028773	9
	-40	0.050248	0.01114	9	0.084964	0.02831	9
	-38.75	0.051159	0.011513	9	0.085012	0.028037	9
	-37.5	0.050524	0.011335	9	0.084639	0.027776	9
	-36.25	0.051364	0.011031	9	0.084691	0.027938	9
	-35	0.051722	0.01114	9	0.083615	0.028194	9
	-33.75	0.052755	0.011614	9	0.080126	0.026679	9
	-32.5	0.050118	0.011576	9	0.076503	0.024869	9
	-31.25	0.050609	0.012333	9	0.06054	0.015931	9
	-30	0.051995	0.012705	9	0.060888	0.015625	9
	-28.75	0.053394	0.013242	9	0.06333	0.016048	9
	-27.5	0.055251	0.013811	9	0.065269	0.017084	9
	-26.25	0.056086	0.014049	9	0.065242	0.017118	9
	-25	0.056559	0.014294	9	0.064169	0.016276	9
	-23.75	0.059032	0.014117	9	0.066654	0.017455	9
	-22.5	0.05812	0.014223	9	0.068787	0.018512	9
	-21.25	0.05822	0.014804	9	0.069116	0.018886	9
	-20	0.058147	0.014461	9	0.07063	0.019455	9
	-18.75	0.058239	0.013894	9	0.071431	0.019632	9
	-17.5	0.059715	0.014465	9	0.07193	0.019755	9
	-16.25	0.059289	0.014552	9	0.070501	0.019887	9
	-15	0.069715	0.017764	9	0.070247	0.019326	9
	-13.75	0.072048	0.018559	9	0.070559	0.018907	9
	-12.5	0.072143	0.018158	9	0.072892	0.018416	9
	-11.25	0.075096	0.017644	9	0.076794	0.018886	9
	-10	0.074605	0.017733	9	0.075708	0.018459	9
	-8.75	0.075079	0.017779	9	0.075315	0.017786	9
	-7.5	0.076306	0.017857	9	0.075754	0.01828	9
	-6.25	0.076254	0.018359	9	0.074972	0.018083	9
	-5	0.077719	0.018874	9	0.076157	0.018172	9
	-3.75	0.077468	0.019494	9	0.075544	0.017569	9
	-2.5	0.077631	0.019781	9	0.075145	0.017077	9
	-1.25	0.077042	0.019614	9	0.087638	0.02595	9
	0	0.077139	0.019475	9	0.089355	0.026691	9
	1.25	0.078276	0.020846	9	0.092192	0.027515	9
	2.5	0.078397	0.021735	9	0.093458	0.027706	9
	3.75	0.079658	0.02277	9	0.095528	0.028296	9
	5	0.074926	0.01998	9	0.09646	0.028739	9
	6.25	0.072032	0.01956	9	0.097292	0.029119	9
	7.5	0.07018	0.019604	9	0.098838	0.029808	9
	8.75	0.065696	0.019598	9	0.097471	0.029146	9
	10	0.065555	0.019442	9	0.096984	0.028679	9
	11.25	0.064583	0.019234	9	0.096128	0.028491	9
	12.5	0.062362	0.018794	9	0.094985	0.02792	9
	13.75	0.062145	0.01834	9	0.102082	0.030069	9
	15	0.061192	0.017798	9	0.104578	0.032198	9
	16.25	0.061238	0.017161	9	0.107489	0.035027	9
	17.5	0.063834	0.016872	9	0.106955	0.035153	9
	18.75	0.065345	0.017319	9	0.099136	0.029079	9
	20	0.065174	0.017358	9	0.098325	0.028115	9
	21.25	0.06459	0.015945	9	0.095344	0.027105	9
	22.5	0.06484	0.014561	9	0.094738	0.026724	9
	23.75	0.062999	0.013412	9	0.092148	0.02615	9
	25	0.061101	0.013301	9	0.091072	0.02583	9
	26.25	0.061121	0.013789	9	0.09007	0.025898	9
	27.5	0.062537	0.014452	9	0.086778	0.025291	9
	28.75	0.063678	0.014558	9	0.085707	0.025576	9
	30	0.064945	0.014798	9	0.085203	0.025873	9
	31.25	0.065444	0.015409	9	0.084452	0.025843	9
	32.5	0.066617	0.015635	9	0.083272	0.025303	9
	33.75	0.070584	0.016427	9	0.076771	0.022679	9
	35	0.075112	0.017061	9	0.071023	0.018957	9
	36.25	0.076464	0.01717	9	0.062944	0.014063	9
	37.5	0.080112	0.018115	9	0.062649	0.013126	9
	38.75	0.080484	0.018491	9	0.059291	0.01223	9
	40	0.083933	0.018753	9	0.056235	0.012672	9
	41.25	0.086522	0.019404	9	0.0567	0.013654	9
	42.5	0.08702	0.019649	9	0.055594	0.014073	9
	43.75	0.092177	0.021658	9	0.055458	0.014212	9
	45	0.094213	0.02251	9	0.057136	0.013776	9
	46.25	0.097168	0.024016	9	0.058128	0.012701	9
	47.5	0.098145	0.024491	9	0.058808	0.01238	9
	48.75	0.101069	0.025481	9	0.058032	0.011502	9
	50	0.104492	0.026573	9	0.058171	0.011567	9
	51.25	0.106298	0.027247	9	0.05959	0.011465	9
	52.5	0.117424	0.030218	9	0.059074	0.011127	9
	53.75	0.117995	0.030414	9	0.056408	0.012255	9
	55	0.121409	0.033056	9	0.055979	0.012716	9
	56.25	0.123171	0.033934	9	0.055939	0.013485	9
	57.5	0.123928	0.034915	9	0.058779	0.01421	9
	58.75	0.125834	0.035376	9	0.062656	0.014796	9
	60	0.127039	0.036095	9	0.063976	0.015125	9
	61.25	0.130226	0.036099	9	0.066328	0.015168	9
	62.5	0.133268	0.036631	9	0.067605	0.015341	9
	63.75	0.131366	0.036217	9	0.070339	0.014829	9
	65	0.131563	0.036465	9	0.071815	0.015214	9
	66.25	0.132139	0.037252	9	0.072873	0.015578	9
	67.5	0.132386	0.037456	9	0.081882	0.017996	9
	68.75	0.132327	0.038083	9	0.100539	0.02846	9
	70	0.130885	0.038403	9	0.117594	0.040033	9
	71.25	0.130757	0.038366	9	0.118665	0.04037	9
	72.5	0.127192	0.035274	9	0.121508	0.040144	9
	73.75	0.130235	0.035789	9	0.122274	0.039774	9
	75	0.13039	0.034167	9	0.154083	0.041607	9
	76.25	0.133051	0.033104	9	0.165479	0.047224	9
	77.5	0.131868	0.03139	9	0.180618	0.053887	9
	78.75	0.141401	0.035782	9	0.184627	0.054674	9
	80	0.147085	0.039919	9	0.191453	0.058882	9
	81.25	0.145112	0.039771	9	0.19429	0.059388	9
	82.5	0.166899	0.039402	9	0.196952	0.060154	9
	83.75	0.173022	0.03809	9	0.201093	0.060642	9
	85	0.176971	0.036814	9	0.203582	0.062044	9
	86.25	0.217839	0.04006	9	0.207548	0.062681	9
	87.5	0.226236	0.043147	9	0.22012	0.063077	9
	88.75	0.231172	0.046962	9	0.228244	0.061034	9
	90	0.237827	0.051726	9	0.224963	0.060091	9
	91.25	0.238434	0.052271	9	0.264562	0.069735	9
	92.5	0.237228	0.053039	9	0.270272	0.070376	9
	93.75	0.251003	0.049074	9	0.279626	0.074763	9
	95	0.252794	0.049169	9	0.272766	0.071376	9
	96.25	0.25827	0.054326	9	0.265108	0.069133	9
	97.5	0.292941	0.066194	9	0.249378	0.067703	9
	98.75	0.288761	0.067603	9	0.258894	0.067262	9
	100	0.285848	0.076607	9	0.252732	0.067749	9
	101.25	0.289051	0.081533	9	0.259275	0.071232	9
	102.5	0.282978	0.085305	9	0.264241	0.074479	9
	103.75	0.283762	0.086565	9	0.262049	0.074632	9
	105	0.281262	0.086821	9	0.257889	0.074562	9
	106.25	0.274841	0.080771	9	0.256714	0.074487	9
	107.5	0.269815	0.079982	9	0.251684	0.071322	9
	108.75	0.265052	0.077809	9	0.244299	0.068426	9
	110	0.259983	0.074595	9	0.239374	0.066038	9
	111.25	0.263964	0.076615	9	0.221807	0.052266	9
	112.5	0.26906	0.079733	9	0.23256	0.054559	9
	113.75	0.261128	0.081109	9	0.21927	0.052549	9
	115	0.265697	0.088239	9	0.218978	0.051871	9
	116.25	0.262247	0.088656	9	0.221416	0.051636	9
	117.5	0.24408	0.085999	9	0.22401	0.052562	9
	118.75	0.235327	0.086229	9	0.219482	0.050796	9
	120	0.227855	0.079306	9	0.214947	0.05012	9
	121.25	0.22264	0.07467	9	0.216262	0.043699	9
	122.5	0.215453	0.070508	9	0.202742	0.041908	9
	123.75	0.209856	0.069101	9	0.200195	0.042505	9
	125	0.20994	0.068994	9	0.20125	0.043202	9
	126.25	0.196623	0.066631	9	0.198164	0.04485	9
	127.5	0.196098	0.067521	9	0.198321	0.045563	9
	128.75	0.19821	0.067265	9	0.195392	0.045405	9
	130	0.196603	0.067094	9	0.188535	0.045968	9
	131.25	0.188908	0.06462	9	0.173746	0.041805	9
	132.5	0.18135	0.060461	9	0.158461	0.034863	9
	133.75	0.178952	0.058711	9	0.156527	0.03487	9
	135	0.164278	0.047105	9	0.159257	0.034793	9
	136.25	0.156662	0.040909	9	0.165759	0.035322	9
	137.5	0.128297	0.021174	9	0.161192	0.035206	9
	138.75	0.124923	0.020695	9	0.156699	0.034474	9
	140	0.120298	0.019547	9	0.157147	0.034218	9
	141.25	0.119196	0.018458	9	0.153908	0.030252	9
	142.5	0.114439	0.01756	9	0.153702	0.029982	9
	143.75	0.1138	0.017059	9	0.160402	0.035209	9
	145	0.113661	0.015997	9	0.160224	0.037713	9
	146.25	0.113864	0.015244	9	0.160073	0.038804	9
	147.5	0.104884	0.00949	9	0.154978	0.040748	9
	148.75	0.13173	0.033834	9	0.154851	0.041817	9
	150	0.131666	0.035532	9	0.158661	0.042633	9
	151.25	0.130476	0.036884	9	0.161861	0.043947	9
	152.5	0.126069	0.037784	9	0.164698	0.045438	9
	153.75	0.124086	0.038542	9	0.164386	0.045076	9
	155	0.123809	0.039213	9	0.163591	0.045001	9
	156.25	0.122536	0.039966	9	0.158689	0.041848	9
	157.5	0.120769	0.040231	9	0.156302	0.040973	9
	158.75	0.11907	0.040691	9	0.156008	0.041101	9
	160	0.118342	0.040992	9	0.158283	0.042816	9
	161.25	0.117855	0.041075	9	0.154618	0.04309	9
	162.5	0.119133	0.041074	9	0.154501	0.043204	9
	163.75	0.120028	0.04108	9	0.151835	0.039487	9
	165	0.120377	0.041038	9	0.152538	0.039174	9
	166.25	0.119972	0.040967	9	0.153163	0.039757	9
	167.5	0.120426	0.040611	9	0.152185	0.039546	9
	168.75	0.094838	0.017591	9	0.153556	0.040226	9
	170	0.090141	0.015253	9	0.156421	0.044248	9
	171.25	0.087462	0.013732	9	0.159159	0.047677	9
	172.5	0.088508	0.013983	9	0.154562	0.047864	9
	173.75	0.086942	0.013414	9	0.16155	0.051018	9
	175	0.084955	0.012609	9	0.159301	0.052577	9
	176.25	0.083659	0.012668	9	0.16075	0.053822	9
	177.5	0.089551	0.014438	9	0.162269	0.053645	9
	178.75	0.093519	0.015267	9	0.161791	0.052555	9
	180	0.093535	0.015065	9	0.157857	0.050422	9
	181.25	0.094315	0.014712	9	0.158528	0.049294	9
	182.5	0.094525	0.013864	9	0.16403	0.048691	9
	183.75	0.094409	0.013719	9	0.165569	0.047222	9
	185	0.096527	0.014649	9	0.164597	0.045197	9
	186.25	0.097242	0.015156	9	0.160859	0.043163	9
	187.5	0.097567	0.015348	9	0.161369	0.041839	9
	188.75	0.099061	0.015317	9	0.162002	0.040603	9
	190	0.100099	0.015443	9	0.160902	0.040026	9
	191.25	0.100615	0.015149	9	0.154034	0.035513	9
	192.5	0.099365	0.014863	9	0.150973	0.033355	9
	193.75	0.099317	0.014825	9	0.13874	0.027746	9
	195	0.09969	0.014502	9	0.13596	0.024768	9
	196.25	0.098755	0.014109	9	0.132142	0.022513	9
	197.5	0.093923	0.012219	9	0.132904	0.021736	9
	198.75	0.090951	0.010888	9	0.135237	0.021927	9
	200	0.092487	0.010901	9	0.139531	0.023053	9
	201.25	0.092074	0.010667	9	0.140122	0.023551	9
	202.5	0.091635	0.011082	9	0.134576	0.022705	9
	203.75	0.091344	0.011089	9	0.129873	0.022652	9
	205	0.087874	0.010995	9	0.127558	0.022628	9
	206.25	0.086344	0.01108	9	0.12896	0.023561	9
	207.5	0.084943	0.011909	9	0.130023	0.023572	9
	208.75	0.082808	0.012182	9	0.127801	0.022816	9
	210	0.081364	0.012213	9	0.116541	0.018805	9
	211.25	0.081545	0.011808	9	0.116999	0.02024	9
	212.5	0.082057	0.012489	9	0.117751	0.020814	9
	213.75	0.083916	0.01299	9	0.118837	0.020859	9
	215	0.08369	0.012856	9	0.118522	0.021132	9
	216.25	0.083473	0.012669	9	0.121683	0.021662	9
	217.5	0.082428	0.012307	9	0.123637	0.02157	9
	218.75	0.082092	0.011798	9	0.122541	0.020397	9
	220	0.080644	0.011212	9	0.11893	0.018326	9
	221.25	0.079569	0.010849	9	0.11839	0.017581	9
	222.5	0.077802	0.01036	9	0.120897	0.017381	9
	223.75	0.077427	0.010052	9	0.121522	0.0176	9
	225	0.075821	0.010079	9	0.121864	0.017381	9
	226.25	0.075958	0.010242	9	0.119853	0.017452	9
	227.5	0.074385	0.009595	9	0.118135	0.017674	9
	228.75	0.074964	0.009177	9	0.117142	0.017434	9
	230	0.074502	0.009041	9	0.114296	0.016883	9
	231.25	0.074311	0.009004	9	0.111387	0.016336	9
	232.5	0.070542	0.008279	9	0.1103	0.016579	9
	233.75	0.066891	0.008254	9	0.111838	0.018037	9
	235	0.065315	0.008657	9	0.114075	0.019491	9
	236.25	0.064842	0.008606	9	0.110744	0.018533	9
	237.5	0.064592	0.008812	9	0.108074	0.017247	9
	238.75	0.06455	0.008857	9	0.107219	0.016822	9
	240	0.065757	0.009012	9	0.106902	0.017027	9
	241.25	0.065501	0.009112	9	0.106415	0.018051	9
	242.5	0.066354	0.009413	9	0.10282	0.017674	9
	243.75	0.064567	0.009712	9	0.101054	0.017677	9
	245	0.063378	0.009878	9	0.100148	0.018466	9
	246.25	0.064097	0.0097	9	0.098522	0.017971	9
	247.5	0.064243	0.009699	9	0.096957	0.017393	9
	248.75	0.061875	0.009397	9	0.096826	0.017011	9
	250	0.06291	0.009907	9	0.09849	0.017697	9
	251.25	0.063611	0.01012	9	0.096203	0.016983	9
	252.5	0.064746	0.009969	9	0.094533	0.016215	9
	253.75	0.064331	0.00987	9	0.090504	0.014212	9
	255	0.063756	0.009606	9	0.085267	0.012976	9
	256.25	0.062854	0.009681	9	0.084011	0.012663	9
	257.5	0.06198	0.009663	9	0.082666	0.012604	9
	258.75	0.060395	0.009436	9	0.083463	0.012568	9
	260	0.059754	0.008809	9	0.083359	0.012308	9
	261.25	0.05998	0.00871	9	0.081014	0.011905	9
	262.5	0.057949	0.008187	9	0.079603	0.011341	9
	263.75	0.057662	0.008044	9	0.079266	0.011026	9
	265	0.058444	0.008196	9	0.077698	0.010185	9
	266.25	0.055894	0.008277	9	0.077927	0.010258	9
	267.5	0.054701	0.00839	9	0.078316	0.01073	9
	268.75	0.056057	0.008443	9	0.077432	0.011112	9
	270	0.055022	0.008205	9	0.073964	0.009806	9
	271.25	0.054247	0.008543	9	0.075572	0.009943	9
	272.5	0.053997	0.008432	9	0.077364	0.010395	9
	273.75	0.054493	0.008503	9	0.07949	0.011102	9
	275	0.054668	0.008619	9	0.078226	0.011342	9
	276.25	0.055054	0.008671	9	0.083574	0.012331	9
	277.5	0.054899	0.00858	9	0.085102	0.013141	9
	278.75	0.054207	0.008453	9	0.085832	0.013787	9
	280	0.05276	0.008226	9	0.084638	0.014024	9
	281.25	0.052165	0.008622	9	0.085834	0.014685	9
	282.5	0.05223	0.008792	9	0.087645	0.015799	9
	283.75	0.051971	0.00887	9	0.088643	0.016153	9
	285	0.05079	0.008691	9	0.089735	0.017114	9
	286.25	0.051124	0.008886	9	0.088959	0.017469	9
	287.5	0.050859	0.008906	9	0.086708	0.018238	9
	288.75	0.049095	0.008958	9	0.085876	0.018314	9
	290	0.047753	0.009164	9	0.08542	0.018156	9
	291.25	0.045204	0.008853	9	0.0844	0.018117	9
	292.5	0.043901	0.008846	9	0.083758	0.017819	9
	293.75	0.04253	0.008738	9	0.082413	0.017659	9
	295	0.04325	0.009179	9	0.081521	0.017495	9
	296.25	0.041857	0.009242	9	0.077713	0.015809	9
	297.5	0.041285	0.009395	9	0.075802	0.01535	9
	298.75	0.041558	0.00956	9	0.074045	0.014928	9
	300	0.041681	0.009626	9	0.073821	0.014798	9
	301.25	0.041019	0.009444	9	0.072228	0.014034	9
	302.5	0.040534	0.009515	9	0.069661	0.013091	9
	303.75	0.040387	0.00962	9	0.067342	0.012637	9
	305	0.040587	0.010101	9	0.063908	0.01202	9
	306.25	0.039572	0.010611	9	0.064131	0.011937	9
	307.5	0.042393	0.010644	9	0.064135	0.011925	9
	308.75	0.042626	0.010754	9	0.062975	0.011361	9
	310	0.041983	0.010555	9	0.062645	0.011417	9
	311.25	0.041813	0.010402	9	0.06148	0.01103	9
	312.5	0.041751	0.010523	9	0.060494	0.010412	9
	313.75	0.041769	0.010566	9	0.060477	0.010183	9
	315	0.040746	0.009988	9	0.059118	0.009859	9
	316.25	0.041338	0.010263	9	0.057404	0.009444	9
	317.5	0.04204	0.010406	9	0.056309	0.009317	9
	318.75	0.042087	0.010425	9	0.053034	0.008676	9
	320	0.041814	0.010225	9	0.049911	0.008265	9
	321.25	0.042015	0.01002	9	0.048049	0.008157	9
	322.5	0.04355	0.010026	9	0.045594	0.007835	9
	323.75	0.044131	0.010494	9	0.045146	0.008027	9
	325	0.052803	0.016889	9	0.045477	0.008594	9
	326.25	0.053908	0.018296	9	0.043976	0.009213	9
	327.5	0.051179	0.018141	9	0.043822	0.009417	9
	328.75	0.05188	0.018133	9	0.04351	0.009411	9
	330	0.051759	0.018129	9	0.04353	0.009892	9
	331.25	0.051866	0.018232	9	0.043399	0.00994	9
	332.5	0.051823	0.018329	9	0.043155	0.009691	9
	333.75	0.051693	0.018394	9	0.041167	0.009072	9
	335	0.051622	0.018464	9	0.041243	0.008977	9
	336.25	0.052022	0.018715	9	0.041313	0.008895	9
	337.5	0.051341	0.018809	9	0.040405	0.00873	9
	338.75	0.051149	0.01889	9	0.040317	0.008569	9
	340	0.051382	0.018877	9	0.041715	0.00871	9
	341.25	0.0511	0.018927	9	0.041523	0.008761	9
	342.5	0.049544	0.019041	9	0.040826	0.008673	9
	343.75	0.048931	0.018772	9	0.0399	0.008398	9
	345	0.040659	0.012571	9	0.037756	0.008099	9
	346.25	0.036277	0.010724	9	0.035436	0.007746	9
	347.5	0.036088	0.010856	9	0.033317	0.007422	9
	348.75	0.034856	0.010525	9	0.03332	0.007228	9
	350	0.034844	0.010631	9	0.032098	0.006295	9
	351.25	0.034227	0.010729	9	0.032471	0.006251	9
	352.5	0.033153	0.010816	9	0.033313	0.006648	9
	353.75	0.032278	0.010621	9	0.035065	0.007572	9
	355	0.031897	0.010631	9	0.035285	0.007947	9
	356.25	0.030877	0.009586	9	0.036277	0.008357	9
	357.5	0.03326	0.00942	9	0.037108	0.008814	9
	358.75	0.033106	0.009088	9	0.038721	0.009232	9
	360	0.033235	0.009267	9	0.038159	0.008823	9
	361.25	0.034802	0.009648	9	0.038104	0.008707	9
	362.5	0.036266	0.009829	9	0.03811	0.008812	9
	363.75	0.036762	0.009939	9	0.039568	0.009603	9
	365	0.036825	0.00983	9	0.039697	0.009794	9
	366.25	0.037623	0.010486	9	0.039726	0.00989	9
	367.5	0.037585	0.010603	9	0.039661	0.010046	9
	368.75	0.037816	0.010521	9	0.039733	0.009927	9
	370	0.037914	0.010431	9	0.039933	0.009811	9
	371.25	0.037757	0.010309	9	0.038498	0.009954	9
	372.5	0.037747	0.010374	9	0.037562	0.009523	9
	373.75	0.038315	0.010765	9	0.03559	0.008749	9
	375	0.038713	0.011003	9	0.034914	0.008577	9
	376.25	0.038678	0.011057	9	0.033937	0.0082	9
	377.5	0.036962	0.011278	9	0.033263	0.007776	9
	378.75	0.036837	0.011547	9	0.032031	0.006754	9
	380	0.03665	0.011573	9	0.031436	0.006562	9
	381.25	0.035635	0.011479	9	0.032039	0.006897	9
	382.5	0.033914	0.011847	9	0.032014	0.006743	9
	383.75	0.033711	0.011866	9	0.030093	0.005826	9
	385	0.033519	0.011732	9	0.030836	0.006365	9
	386.25	0.033028	0.011233	9	0.032613	0.006992	9
	387.5	0.033437	0.011358	9	0.032921	0.00722	9
	388.75	0.034417	0.01228	9	0.033141	0.007466	9
	390	0.034622	0.01261	9	0.032861	0.007509	9
	391.25	0.035014	0.012918	9	0.032714	0.007449	9
	392.5	0.035493	0.013111	9	0.032668	0.007501	9
	393.75	0.035446	0.01298	9	0.032382	0.007459	9
	395	0.035065	0.012738	9	0.032124	0.007429	9
	396.25	0.035218	0.012865	9	0.031839	0.007438	9
	397.5	0.0356	0.012961	9	0.031451	0.007488	9
	398.75	0.035586	0.012903	9	0.030726	0.007594	9
	400	0.035364	0.01281	9	0.03067	0.00773	9
	401.25	0.034773	0.012461	9	0.02952	0.007426	9
	402.5	0.033819	0.011962	9	0.029195	0.007555	9
	403.75	0.033667	0.011862	9	0.028677	0.007626	9
	405	0.033357	0.011796	9	0.027387	0.006916	9
	406.25	0.033659	0.012084	9	0.025216	0.006317	9
	407.5	0.032952	0.011716	9	0.024585	0.006036	9
	408.75	0.031367	0.010738	9	0.023809	0.006063	9
	410	0.030815	0.010418	9	0.023467	0.00629	9
	411.25	0.02989	0.009876	9	0.023424	0.006556	9
	412.5	0.028891	0.009326	9	0.022989	0.006697	9
	413.75	0.027955	0.00888	9	0.022903	0.006702	9
	415	0.027087	0.008418	9	0.022749	0.006635	9
	416.25	0.026862	0.008042	9	0.02261	0.006612	9
	417.5	0.025547	0.00731	9	0.022374	0.006549	9
	418.75	0.024741	0.006896	9	0.022131	0.00643	9
	420	0.024082	0.006647	9	0.021959	0.006239	9
	421.25	0.023966	0.006616	9	0.021729	0.006038	9
	422.5	0.023702	0.006544	9	0.021413	0.005866	9
	423.75	0.022832	0.006185	9	0.020872	0.005464	9
	425	0.022945	0.006278	9	0.020381	0.005186	9
	426.25	0.021425	0.005797	9	0.019809	0.00483	9
	427.5	0.021074	0.005723	9	0.01933	0.004579	9
	428.75	0.02114	0.006257	9	0.018807	0.00431	9
	430	0.01958	0.00634	9	0.018351	0.004117	9
	431.25	0.019452	0.006364	9	0.017477	0.003781	9
	432.5	0.019348	0.006304	9	0.016128	0.003669	9
	433.75	0.019552	0.006358	9	0.015612	0.003654	9
	435	0.019953	0.006645	9	0.015542	0.003648	9
	436.25	0.019389	0.006645	9	0.015548	0.003639	9
	437.5	0.021833	0.007317	9	0.015675	0.003685	9
	438.75	0.022906	0.00831	9	0.016633	0.003697	9
	440	0.023456	0.008857	9	0.016835	0.003697	9
	441.25	0.023581	0.009149	9	0.017001	0.003757	9
	442.5	0.023674	0.009334	9	0.0171	0.003786	9
	443.75	0.024413	0.010013	9	0.017231	0.003851	9
	445	0.024936	0.010448	9	0.01719	0.003782	9
	446.25	0.025659	0.011105	9	0.017208	0.003767	9
	447.5	0.026294	0.011761	9	0.017391	0.003813	9
	448.75	0.026632	0.012107	9	0.01753	0.00389	9
	450	0.026701	0.012189	9	0.01808	0.003842	9
	451.25	0.026728	0.012226	9	0.019901	0.004278	9
	452.5	0.026754	0.012277	9	0.020355	0.004354	9
	453.75	0.026727	0.01237	9	0.023446	0.005065	9
	455	0.02663	0.012309	9	0.023325	0.00505	9
	456.25	0.026781	0.012379	9	0.023212	0.005056	9
	457.5	0.024364	0.01214	9	0.022968	0.00499	9
	458.75	0.023598	0.011496	9	0.022722	0.004928	9
	460	0.023183	0.011069	9	0.02254	0.004887	9
	461.25	0.023083	0.010827	9	0.022311	0.004838	9
	462.5	0.02302	0.010728	9	0.022185	0.004841	9
	463.75	0.022702	0.010439	9	0.022059	0.004808	9
	465	0.022094	0.009883	9	0.022214	0.004881	9
	466.25	0.021069	0.008968	9	0.022118	0.004868	9
	467.5	0.020331	0.008382	9	0.022092	0.004916	9
	468.75	0.019363	0.007478	9	0.021834	0.004891	9
	470	0.019255	0.007475	9	0.021542	0.004883	9
	471.25	0.019119	0.007418	9	0.019204	0.00485	9
	472.5	0.018809	0.007261	9	0.020204	0.004927	9
	473.75	0.018734	0.007068	9	0.017704	0.003746	9
	475	0.018342	0.006845	9	0.017716	0.003744	9
	476.25	0.018069	0.006601	9	0.017812	0.003778	9
	477.5	0.017966	0.006397	9	0.017781	0.003802	9
	478.75	0.017622	0.006206	9	0.018005	0.003673	9
	480	0.017433	0.006073	9	0.018111	0.003705	9
	481.25	0.017297	0.005926	9	0.0182	0.003689	9
	482.5	0.017117	0.005761	9	0.018288	0.003716	9
	483.75	0.016158	0.005039	9	0.018212	0.003658	9
	485	0.015715	0.004634	9	0.017866	0.003587	9
	486.25	0.015181	0.004292	9	0.017938	0.003565	9
	487.5	0.014376	0.003747	9	0.01791	0.003609	9
	488.75	0.013778	0.003439	9	0.01795	0.003592	9
	490	0.013043	0.003157	9	0.018241	0.003654	9
	491.25	0.012889	0.003171	9	0.018041	0.003586	9
	492.5	0.012523	0.003121	9	0.016894	0.003261	9
	493.75	0.011718	0.003056	9	0.016493	0.003219	9
	495	0.011739	0.003118	9	0.016484	0.003233	9
	496.25	0.012008	0.003245	9	0.016484	0.003164	9
	497.5	0.011994	0.003221	9	0.01647	0.003162	9
	498.75	0.012131	0.00331	9	0.016003	0.003066	9
	500	0.012089	0.003333	9	0.01583	0.003014	9
	501.25	0.012004	0.003269	9	0.01549	0.002945	9
	502.5	0.01196	0.003245	9	0.015448	0.002902	9
	503.75	0.011972	0.003249	9	0.015445	0.002977	9
	505	0.011896	0.003231	9	0.015434	0.003042	9
	506.25	0.012069	0.003385	9	0.01534	0.003029	9
	507.5	0.012105	0.003393	9	0.015081	0.002922	9
	508.75	0.012157	0.003465	9	0.015059	0.00297	9
	510	0.012392	0.003439	9	0.014413	0.002802	9
	511.25	0.012391	0.003375	9	0.014433	0.002815	9
	512.5	0.012441	0.003423	9	0.015269	0.00301	9
	513.75	0.01246	0.003517	9	0.015742	0.003194	9
	515	0.012427	0.003535	9	0.015892	0.003368	9
	516.25	0.012165	0.003435	9	0.015763	0.003414	9
	517.5	0.012144	0.003407	9	0.015989	0.003482	9
	518.75	0.012151	0.003452	9	0.016003	0.003502	9
	520	0.01222	0.003475	9	0.01594	0.003466	9
	521.25	0.012255	0.003517	9	0.016058	0.003508	9
	522.5	0.012274	0.003531	9	0.016099	0.003565	9
	523.75	0.012255	0.003522	9	0.016448	0.003771	9
	525	0.012359	0.003576	9	0.016414	0.003747	9
	526.25	0.012228	0.003407	9	0.016393	0.003729	9
	527.5	0.012178	0.003448	9	0.016364	0.003699	9
	528.75	0.01206	0.003374	9	0.016323	0.003681	9
	530	0.01182	0.003415	9	0.016289	0.003645	9
	531.25	0.01171	0.003396	9	0.015986	0.003578	9
	532.5	0.011678	0.003362	9	0.01538	0.003183	9
	533.75	0.01166	0.003285	9	0.015042	0.002996	9
	535	0.011605	0.003217	9	0.014671	0.00284	9
	536.25	0.01164	0.003221	9	0.014507	0.002742	9
	537.5	0.011656	0.003236	9	0.014183	0.002623	9
	538.75	0.011592	0.003145	9	0.014162	0.002614	9
	540	0.011522	0.003145	9	0.014254	0.002712	9
	541.25	0.011581	0.003152	9	0.014239	0.002672	9
	542.5	0.01152	0.00315	9	0.013864	0.002573	9
	543.75	0.01152	0.003218	9	0.013079	0.002428	9
	545	0.011481	0.003205	9	0.013496	0.002398	9
	546.25	0.011431	0.003188	9	0.014	0.002545	9
	547.5	0.011492	0.003114	9	0.024708	0.011914	9
	548.75	0.011505	0.00308	9	0.024971	0.012209	9
	550	0.011621	0.003164	9	0.02503	0.01221	9
	551.25	0.011657	0.003203	9	0.025072	0.012205	9
	552.5	0.011644	0.003242	9	0.024899	0.012186	9
	553.75	0.011652	0.003313	9	0.02491	0.012159	9
	555	0.01166	0.003345	9	0.025082	0.01215	9
	556.25	0.01154	0.003325	9	0.025313	0.012185	9
	557.5	0.011422	0.003232	9	0.025319	0.012201	9
	558.75	0.011479	0.003263	9	0.025871	0.012138	9
	560	0.01157	0.003245	9	0.026066	0.012112	9
	561.25	0.011456	0.003172	9	0.026335	0.012109	9
	562.5	0.01149	0.003203	9	0.026616	0.012106	9
	563.75	0.011404	0.003103	9	0.026742	0.012123	9
	565	0.011294	0.003036	9	0.026788	0.012058	9
	566.25	0.011232	0.002993	9	0.026929	0.011979	9
	567.5	0.011218	0.003065	9	0.0171	0.003439	9
	568.75	0.011347	0.003169	9	0.015626	0.003154	9
	570	0.011171	0.003077	9	0.015571	0.003175	9
	571.25	0.011171	0.003066	9	0.015692	0.00325	9
	572.5	0.011367	0.003154	9	0.015797	0.003296	9
	573.75	0.011434	0.003168	9	0.015907	0.00333	9
	575	0.011487	0.003143	9	0.016029	0.003368	9
	576.25	0.011591	0.003207	9	0.015923	0.003338	9
	577.5	0.011668	0.003295	9	0.01585	0.003373	9
	578.75	0.011624	0.003259	9	0.015663	0.003296	9
	580	0.011639	0.003282	9	0.015476	0.003233	9
	581.25	0.011698	0.003351	9	0.015236	0.003121	9
	582.5	0.011589	0.003218	9	0.015139	0.003085	9
	583.75	0.011652	0.003267	9	0.014798	0.00304	9
	585	0.011739	0.003333	9	0.014722	0.00296	9
	586.25	0.011894	0.003428	9	0.014638	0.002929	9
	587.5	0.0118	0.003355	9	0.014393	0.002809	9
	588.75	0.011743	0.003265	9	0.014357	0.002774	9
	590	0.011803	0.003291	9	0.014372	0.002798	9
	591.25	0.011706	0.003206	9	0.014309	0.002816	9
	592.5	0.011592	0.003111	9	0.014225	0.002783	9
	593.75	0.011456	0.003035	9	0.014166	0.002763	9
	595	0.011455	0.00312	9	0.013817	0.002683	9
	596.25	0.011341	0.003046	9	0.013343	0.002698	9
	597.5	0.011182	0.002888	9	0.01335	0.002747	9
	598.75	0.011264	0.002982	9	0.013287	0.002717	9
	600	0.011256	0.00298	9	0.01323	0.002737	9
	601.25	0.011141	0.00293	9	0.013179	0.002721	9
	602.5	0.011178	0.003004	9	0.013175	0.002761	9
	603.75	0.011188	0.003002	9	0.013225	0.002774	9
	605	0.011148	0.002996	9	0.013285	0.002914	9
	606.25	0.01106	0.002937	9	0.013131	0.002886	9
	607.5	0.011207	0.003028	9	0.013074	0.002891	9
	608.75	0.011142	0.002993	9	0.013087	0.002899	9
	610	0.011074	0.002957	9	0.013047	0.002893	9
	611.25	0.011109	0.002985	9	0.013011	0.002859	9
	612.5	0.011079	0.003019	9	0.013069	0.002885	9
	613.75	0.011119	0.003024	9	0.013341	0.002815	9
	615	0.011051	0.002963	9	0.014011	0.002827	9
	616.25	0.011149	0.003036	9	0.014127	0.002848	9
	617.5	0.011255	0.003158	9	0.014211	0.002873	9
	618.75	0.011235	0.00312	9	0.014198	0.002871	9
	620	0.011083	0.003056	9	0.014117	0.002852	9
	621.25	0.011098	0.003002	9	0.014197	0.002886	9
	622.5	0.011119	0.003007	9	0.014187	0.002865	9
	623.75	0.011146	0.003043	9	0.014287	0.002938	9
	625	0.011099	0.003	9	0.014263	0.002894	9
	626.25	0.011125	0.003051	9	0.014462	0.002961	9
	627.5	0.011123	0.003037	9	0.01444	0.002958	9
	628.75	0.011099	0.003068	9	0.014488	0.003001	9
	630	0.011262	0.003182	9	0.014545	0.003018	9
	631.25	0.011286	0.003196	9	0.014556	0.003059	9
	632.5	0.011282	0.003124	9	0.014513	0.00306	9
	633.75	0.011332	0.003175	9	0.014278	0.00302	9
	635	0.011306	0.003109	9	0.013708	0.003114	9
	636.25	0.011192	0.003031	9	0.013712	0.003199	9
	637.5	0.011239	0.003004	9	0.013532	0.003113	9
	638.75	0.011175	0.003003	9	0.013355	0.003031	9
	640	0.011231	0.002984	9	0.013452	0.003098	9
	641.25	0.011168	0.002998	9	0.0134	0.003079	9
	642.5	0.011171	0.002957	9	0.01339	0.003057	9
	643.75	0.011137	0.002929	9	0.013312	0.002992	9
	645	0.01109	0.002867	9	0.013147	0.002924	9
	646.25	0.011093	0.002823	9	0.012851	0.002842	9
	647.5	0.011072	0.002804	9	0.01303	0.002911	9
	648.75	0.011067	0.002802	9	0.012991	0.002879	9
	650	0.010993	0.002769	9	0.01297	0.002901	9
	651.25	0.011084	0.00286	9	0.012983	0.00294	9
	652.5	0.011148	0.002986	9	0.013134	0.002976	9
	653.75	0.011169	0.00305	9	0.013181	0.002986	9
	655	0.011318	0.003175	9	0.013125	0.002924	9
	656.25	0.011465	0.00328	9	0.01293	0.002794	9
	657.5	0.011387	0.003214	9	0.013158	0.002875	9
	658.75	0.011437	0.00328	9	0.013379	0.00301	9
	660	0.011577	0.003442	9	0.013397	0.00299	9
	661.25	0.011614	0.003492	9	0.013371	0.002966	9
	662.5	0.011696	0.003544	9	0.013201	0.002904	9
	663.75	0.011732	0.003596	9	0.013078	0.002836	9
	665	0.011762	0.003644	9	0.013298	0.003012	9
	666.25	0.011782	0.003656	9	0.013396	0.003026	9
	667.5	0.011811	0.003679	9	0.013248	0.002939	9
	668.75	0.011776	0.00368	9	0.013176	0.002889	9
	670	0.01177	0.003638	9	0.013142	0.002856	9
	671.25	0.011747	0.003603	9	0.013145	0.002836	9
	672.5	0.011732	0.00359	9	0.013065	0.002815	9
	673.75	0.011591	0.003415	9	0.013083	0.002838	9
	675	0.011581	0.003434	9	0.012954	0.002812	9
	676.25	0.011603	0.003412	9	0.012969	0.002828	9
	677.5	0.011606	0.003457	9	0.012769	0.002722	9
	678.75	0.011574	0.003379	9	0.012675	0.002664	9
	680	0.011516	0.003272	9	0.012578	0.002596	9
	681.25	0.011571	0.003237	9	0.012758	0.002708	9
	682.5	0.011549	0.003279	9	0.012874	0.002797	9
	683.75	0.011511	0.003224	9	0.013045	0.002937	9
	685	0.01155	0.003306	9	0.013009	0.002833	9
	686.25	0.011528	0.003306	9	0.013007	0.002825	9
	687.5	0.011375	0.003229	9	0.013016	0.002832	9
	688.75	0.011445	0.003239	9	0.013022	0.002798	9
	690	0.011444	0.003231	9	0.013123	0.002901	9
	691.25	0.011399	0.003206	9	0.0131	0.002911	9
	692.5	0.01141	0.003211	9	0.013129	0.002945	9
	693.75	0.011556	0.003303	9	0.013093	0.002938	9
	695	0.011485	0.003217	9	0.013174	0.002982	9
	696.25	0.011454	0.003185	9	0.013211	0.003033	9
	697.5	0.01141	0.003085	9	0.013287	0.0031	9
	698.75	0.011349	0.003043	9	0.013306	0.003146	9
	700	0.0114	0.003116	9	0.013356	0.003148	9
	701.25	0.011372	0.003122	9	0.013263	0.003054	9
	702.5	0.011355	0.003085	9	0.013418	0.003085	9
	703.75	0.01129	0.00303	9	0.013299	0.00297	9
	705	0.011367	0.003033	9	0.013207	0.002966	9
	706.25	0.011272	0.002971	9	0.013301	0.003024	9
	707.5	0.011314	0.003002	9	0.01332	0.003084	9
	708.75	0.011357	0.002987	9	0.013347	0.00313	9
	710	0.011324	0.00298	9	0.013211	0.00304	9
	711.25	0.011257	0.002908	9	0.013096	0.002994	9
	712.5	0.011193	0.002849	9	0.013028	0.002952	9
	713.75	0.011191	0.002909	9	0.013373	0.002925	9
	715	0.011163	0.002942	9	0.01358	0.002896	9
	716.25	0.011071	0.002868	9	0.01355	0.002872	9
	717.5	0.0111	0.002956	9	0.013447	0.002832	9
	718.75	0.011091	0.002976	9	0.013392	0.002749	9
	720	0.011032	0.002901	9	0.013385	0.002765	9
	721.25	0.011035	0.002921	9	0.013384	0.002806	9
	722.5	0.010944	0.002857	9	0.013319	0.002797	9
	723.75	0.010883	0.002813	9	0.013402	0.002881	9
	725	0.010704	0.002665	9	0.01337	0.002826	9
	726.25	0.010764	0.002752	9	0.013355	0.002859	9
	727.5	0.01081	0.002798	9	0.013389	0.002842	9
	728.75	0.010833	0.002911	9	0.013279	0.002803	9
	730	0.010881	0.002963	9	0.013335	0.002767	9
	731.25	0.01084	0.002968	9	0.013416	0.002793	9
	732.5	0.010847	0.00294	9	0.013508	0.002839	9
	733.75	0.010807	0.002937	9	0.01337	0.002849	9
	735	0.010736	0.002821	9	0.013008	0.00286	9
	736.25	0.010877	0.002958	9	0.013063	0.002877	9
	737.5	0.010925	0.002991	9	0.0131	0.002907	9
	738.75	0.011004	0.002994	9	0.013229	0.002996	9
	740	0.01098	0.002957	9	0.01319	0.003006	9
	741.25	0.010855	0.002877	9	0.013379	0.003115	9
	742.5	0.010893	0.0029	9	0.013401	0.003086	9
	743.75	0.011056	0.003045	9	0.0134	0.003083	9
	745	0.011059	0.003041	9	0.01342	0.003122	9
	746.25	0.011118	0.003001	9	0.013341	0.003045	9
	747.5	0.011051	0.002955	9	0.01345	0.003118	9
	748.75	0.011029	0.002881	9	0.013421	0.003086	9
	750	0.01103	0.002889	9	0.013402	0.003121	9
	751.25	0.011139	0.002981	9	0.013405	0.003127	9
	752.5	0.011094	0.002945	9	0.013385	0.003114	9
	753.75	0.011123	0.002917	9	0.013405	0.003115	9
	755	0.011125	0.002937	9	0.013554	0.003174	9
	756.25	0.010979	0.00281	9	0.013481	0.00319	9
	757.5	0.011072	0.002899	9	0.013522	0.003203	9
	758.75	0.01103	0.002944	9	0.013433	0.003159	9
	760	0.010997	0.002956	9	0.013477	0.003187	9
	761.25	0.011041	0.003	9	0.013191	0.003034	9
	762.5	0.011008	0.003019	9	0.013219	0.003029	9
	763.75	0.010947	0.002958	9	0.013048	0.00296	9
	765	0.010997	0.003065	9	0.01307	0.002991	9
	766.25	0.010898	0.003094	9	0.01298	0.003003	9
	767.5	0.010958	0.003151	9	0.012983	0.003042	9
	768.75	0.010949	0.003145	9	0.013105	0.003121	9
	770	0.010919	0.003101	9	0.013105	0.003128	9
	771.25	0.01098	0.003137	9	0.013063	0.003074	9
	772.5	0.01102	0.003203	9	0.012971	0.003012	9
	773.75	0.011002	0.003145	9	0.012827	0.00299	9
	775	0.011025	0.003134	9	0.012753	0.002981	9
	776.25	0.011056	0.0032	9	0.012931	0.002983	9
	777.5	0.010895	0.003099	9	0.013061	0.003048	9
	778.75	0.010877	0.003085	9	0.013047	0.003005	9
	780	0.010804	0.003029	9	0.012921	0.00294	9
	781.25	0.010877	0.003023	9	0.012944	0.00295	9
	782.5	0.010892	0.003003	9	0.012719	0.002907	9
	783.75	0.010847	0.00296	9	0.012766	0.002904	9
	785	0.010855	0.002912	9	0.012921	0.002958	9
	786.25	0.010783	0.002822	9	0.013083	0.003032	9
	787.5	0.010775	0.00283	9	0.012893	0.002895	9
	788.75	0.010808	0.002926	9	0.012913	0.002863	9
	790	0.01083	0.002955	9	0.013077	0.00298	9
	791.25	0.010722	0.002889	9	0.013116	0.003024	9
	792.5	0.010741	0.002927	9	0.013153	0.003042	9
	793.75	0.010767	0.003037	9	0.013137	0.003043	9
	795	0.01087	0.003095	9	0.013119	0.003028	9
	796.25	0.010801	0.003016	9	0.012999	0.002979	9
	797.5	0.010835	0.003051	9	0.012887	0.002908	9
	798.75	0.010871	0.003104	9	0.012907	0.002909	9
	800	0.010924	0.003174	9	0.013073	0.002993	9
	801.25	0.01089	0.003208	9	0.013075	0.002982	9
	802.5	0.010863	0.003175	9	0.013106	0.002941	9
	803.75	0.010876	0.00318	9	0.013211	0.002978	9
	805	0.010871	0.003142	9	0.013176	0.002941	9
	806.25	0.010961	0.003246	9	0.013111	0.002877	9
	807.5	0.011037	0.003233	9	0.013139	0.002893	9
	808.75	0.010912	0.003079	9	0.013049	0.002895	9
	810	0.010793	0.003001	9	0.012943	0.002808	9
	811.25	0.010794	0.002972	9	0.012957	0.002776	9
	812.5	0.010712	0.002871	9	0.012972	0.002798	9
	813.75	0.010579	0.002745	9	0.01308	0.002826	9
	815	0.010463	0.002661	9	0.013004	0.002803	9
	816.25	0.010586	0.002711	9	0.013016	0.002829	9
	817.5	0.010687	0.002757	9	0.013092	0.002893	9
	818.75	0.010637	0.002675	9	0.013069	0.002928	9
	820	0.010675	0.002704	9	0.01291	0.002827	9
	821.25	0.010677	0.002675	9	0.012955	0.002855	9
	822.5	0.010628	0.002646	9	0.013143	0.002963	9
	823.75	0.010642	0.002653	9	0.013158	0.002998	9
	825	0.010571	0.002645	9	0.012993	0.002964	9
	826.25	0.010498	0.002556	9	0.012983	0.002997	9
	827.5	0.010478	0.002557	9	0.013019	0.002999	9
	828.75	0.010575	0.002614	9	0.01301	0.002976	9
	830	0.010598	0.002616	9	0.013049	0.003	9
	831.25	0.010576	0.002609	9	0.012939	0.002987	9
	832.5	0.01063	0.002718	9	0.013009	0.003025	9
	833.75	0.010703	0.002754	9	0.012974	0.003011	9
	835	0.010651	0.002782	9	0.013112	0.003107	9
	836.25	0.010635	0.002778	9	0.013209	0.003155	9
	837.5	0.010524	0.002676	9	0.013148	0.003104	9
	838.75	0.010473	0.002605	9	0.013151	0.003073	9
	840	0.010425	0.002562	9	0.013165	0.003106	9
	841.25	0.010352	0.002546	9	0.01309	0.003043	9
	842.5	0.010395	0.002577	9	0.012898	0.002979	9
	843.75	0.010424	0.002613	9	0.012856	0.002947	9
	845	0.010514	0.002682	9	0.012989	0.003018	9
	846.25	0.010569	0.002689	9	0.012961	0.002982	9
	847.5	0.010489	0.002662	9	0.012998	0.003057	9
	848.75	0.010419	0.002666	9	0.013053	0.003094	9
	850	0.010475	0.002704	9	0.013018	0.003086	9
	851.25	0.0105	0.002728	9	0.013096	0.00309	9
	852.5	0.010479	0.002707	9	0.013005	0.003049	9
	853.75	0.010431	0.002709	9	0.01299	0.003068	9
	855	0.010632	0.002839	9	0.012945	0.003004	9
	856.25	0.010593	0.00285	9	0.012902	0.003018	9
	857.5	0.0106	0.002875	9	0.012858	0.003	9
	858.75	0.010717	0.002992	9	0.012854	0.003035	9
	860	0.010735	0.002953	9	0.012915	0.003093	9
	861.25	0.010794	0.003007	9	0.013201	0.003288	9
	862.5	0.010851	0.003102	9	0.013249	0.003313	9
	863.75	0.010803	0.003075	9	0.013229	0.003302	9
	865	0.010834	0.003051	9	0.013128	0.003242	9
	866.25	0.01085	0.003136	9	0.013152	0.003265	9
	867.5	0.010867	0.003147	9	0.013074	0.003173	9
	868.75	0.010781	0.003132	9	0.013022	0.003125	9
	870	0.010833	0.003097	9	0.013024	0.003165	9
	871.25	0.010861	0.003098	9	0.012994	0.003183	9
	872.5	0.010834	0.003104	9	0.013078	0.003229	9
	873.75	0.010797	0.003097	9	0.013055	0.003203	9
	875	0.010689	0.003013	9	0.013128	0.003261	9
	876.25	0.010596	0.002906	9	0.013022	0.003181	9
	877.5	0.010605	0.002881	9	0.01307	0.00322	9
	878.75	0.010589	0.002852	9	0.013091	0.003223	9
	880	0.010556	0.002898	9	0.013082	0.003158	9
	881.25	0.010546	0.002885	9	0.012921	0.003039	9
	882.5	0.010512	0.002847	9	0.012978	0.003109	9
	883.75	0.010496	0.002843	9	0.013013	0.003137	9
	885	0.010506	0.002873	9	0.013104	0.00317	9
	886.25	0.01051	0.002781	9	0.013161	0.003229	9
	887.5	0.010483	0.002767	9	0.01318	0.003259	9
	888.75	0.010561	0.002779	9	0.01313	0.003292	9
	890	0.010483	0.002761	9	0.013001	0.003176	9
	891.25	0.010484	0.002757	9	0.013045	0.003182	9
	892.5	0.010462	0.002693	9	0.012904	0.00309	9
	893.75	0.010547	0.00274	9	0.012911	0.003103	9
	895	0.01061	0.002721	9	0.012886	0.003098	9
	896.25	0.010672	0.002837	9	0.012927	0.003116	9
	897.5	0.010626	0.002849	9	0.012875	0.003092	9
	898.75	0.010585	0.002833	9	0.012885	0.003128	9
	900	0.010546	0.002779	9	0.013023	0.003262	9
	901.25	0.010615	0.002778	9	0.013033	0.003291	9
	902.5	0.010626	0.002702	9	0.012955	0.003208	9
	903.75	0.010718	0.002732	9	0.012854	0.003177	9
	905	0.010594	0.002679	9	0.012854	0.003204	9
	906.25	0.010556	0.002692	9	0.012827	0.003126	9
	907.5	0.010599	0.00269	9	0.012914	0.003216	9
	908.75	0.010686	0.002753	9	0.013111	0.003297	9
	910	0.010723	0.002825	9	0.013148	0.003321	9
	911.25	0.010814	0.002902	9	0.013034	0.003281	9
	912.5	0.010857	0.002922	9	0.0131	0.003355	9
	913.75	0.010872	0.002913	9	0.013109	0.003371	9
	915	0.010815	0.002905	9	0.013139	0.003348	9
	916.25	0.010799	0.002852	9	0.013263	0.003425	9
	917.5	0.010799	0.002838	9	0.013233	0.003413	9
	918.75	0.010772	0.002829	9	0.013172	0.003331	9
	920	0.010837	0.002903	9	0.013099	0.003311	9
	921.25	0.010757	0.0029	9	0.013064	0.003323	9
	922.5	0.010778	0.002928	9	0.013137	0.00336	9
	923.75	0.010848	0.003017	9	0.01327	0.00341	9
	925	0.010843	0.003011	9	0.016716	0.00402	9
	926.25	0.010914	0.003059	9	0.017077	0.004292	9
	927.5	0.010868	0.003039	9	0.016981	0.004237	9
	928.75	0.010825	0.003043	9	0.016865	0.00425	9
	930	0.01078	0.002984	9	0.016855	0.004232	9
	931.25	0.010584	0.002813	9	0.016981	0.004276	9
	932.5	0.01057	0.002813	9	0.016978	0.004302	9
	933.75	0.010493	0.002775	9	0.017088	0.004297	9
	935	0.010442	0.002738	9	0.017028	0.004289	9
	936.25	0.010441	0.002777	9	0.016883	0.004237	9
	937.5	0.010456	0.002766	9	0.016882	0.004231	9
	938.75	0.010511	0.002826	9	0.016897	0.004252	9
	940	0.010478	0.002787	9	0.016973	0.004224	9
	941.25	0.010414	0.002729	9	0.016943	0.004175	9
	942.5	0.010376	0.002763	9	0.01689	0.004169	9
	943.75	0.010264	0.002654	9	0.016827	0.004166	9
	945	0.010312	0.002709	9	0.014333	0.003071	9
	946.25	0.010264	0.002707	9	0.013077	0.003244	9
	947.5	0.01019	0.002656	9	0.013071	0.00328	9
	948.75	0.010202	0.00266	9	0.012919	0.003167	9
	950	0.010131	0.002625	9	0.012965	0.003206	9
	951.25	0.010198	0.002712	9	0.012912	0.003137	9
	952.5	0.010225	0.002712	9	0.012796	0.003026	9
	953.75	0.010284	0.002743	9	0.012574	0.002972	9
	955	0.010278	0.002769	9	0.012771	0.003076	9
	956.25	0.010403	0.002885	9	0.013016	0.003233	9
	957.5	0.01039	0.002944	9	0.013001	0.003195	9
	958.75	0.010402	0.002945	9	0.013093	0.003216	9
	960	0.010481	0.002989	9	0.013051	0.003251	9
	961.25	0.01061	0.003066	9	0.013108	0.003313	9
	962.5	0.010636	0.003058	9	0.013058	0.003273	9
	963.75	0.010561	0.003034	9	0.013212	0.00333	9
	965	0.010495	0.003011	9	0.013324	0.003352	9
	966.25	0.010388	0.002951	9	0.013249	0.003321	9
	967.5	0.010398	0.002945	9	0.013229	0.003298	9
	968.75	0.010352	0.002938	9	0.013371	0.003374	9
	970	0.010401	0.003004	9	0.013444	0.003422	9
	971.25	0.010387	0.003021	9	0.01344	0.003484	9
	972.5	0.010429	0.00301	9	0.013561	0.003544	9
	973.75	0.010391	0.003	9	0.013581	0.003538	9
	975	0.010498	0.00306	9	0.013369	0.003431	9
	976.25	0.010393	0.002953	9	0.0133	0.003359	9
	977.5	0.010467	0.002968	9	0.013391	0.003479	9
	978.75	0.010366	0.002872	9	0.013295	0.003443	9
	980	0.010297	0.002793	9	0.013278	0.003434	9
	981.25	0.010202	0.002723	9	0.013274	0.003394	9
	982.5	0.010199	0.00275	9	0.013295	0.003433	9
	983.75	0.010166	0.002722	9	0.013192	0.003373	9
	985	0.010191	0.002665	9	0.013034	0.003344	9
	986.25	0.010316	0.002746	9	0.01305	0.003334	9
	987.5	0.0104	0.002802	9	0.013061	0.003333	9
	988.75	0.010452	0.002815	9	0.013096	0.003353	9
	990	0.010473	0.002816	9	0.013157	0.00335	9
	991.25	0.010564	0.002894	9	0.013261	0.003365	9
	992.5	0.010459	0.002881	9	0.013299	0.003434	9
	993.75	0.010453	0.002855	9	0.013276	0.003418	9
	995	0.010282	0.002744	9	0.013306	0.003406	9
	996.25	0.010344	0.002742	9	0.013222	0.003371	9
	997.5	0.010365	0.002742	9	0.013334	0.003413	9
	998.75	0.01033	0.002733	9	0.013317	0.003415	9
	1000	0.010393	0.002828	9	0.013236	0.003341	9
	1001.25	0.010529	0.002942	9	0.013328	0.003415	9
	1002.5	0.010488	0.002891	9	0.013341	0.003407	9
	1003.75	0.01055	0.002918	9	0.013352	0.003425	9
	1005	0.010568	0.002964	9	0.013418	0.003437	9
	1006.25	0.010525	0.002934	9	0.013411	0.003405	9
	1007.5	0.010529	0.002955	9	0.01341	0.0034	9
	1008.75	0.010519	0.002979	9	0.013411	0.003358	9
	1010	0.010636	0.003007	9	0.013401	0.003325	9
	1011.25	0.010533	0.002916	9	0.013286	0.003285	9
	1012.5	0.010647	0.002955	9	0.013207	0.003217	9
	1013.75	0.010697	0.003033	9	0.013315	0.003285	9
	1015	0.010889	0.003146	9	0.013399	0.003372	9
	1016.25	0.010736	0.003116	9	0.013302	0.003347	9
	1017.5	0.010642	0.003095	9	0.01314	0.003255	9
	1018.75	0.010721	0.003186	9	0.013184	0.003308	9
	1020	0.010708	0.003153	9	0.013285	0.003387	9
	1021.25	0.010732	0.003144	9	0.013201	0.003289	9
	1022.5	0.0108	0.003207	9	0.013197	0.003305	9
	1023.75	0.01074	0.003215	9	0.01326	0.003291	9
	1025	0.010754	0.003217	9	0.01317	0.00326	9
	1026.25	0.010747	0.003227	9	0.013186	0.003235	9
	1027.5	0.01075	0.003246	9	0.013262	0.003314	9
	1028.75	0.010675	0.003132	9	0.013266	0.003364	9
	1030	0.010611	0.003109	9	0.013067	0.003323	9
	1031.25	0.010619	0.003127	9	0.013074	0.003353	9
	1032.5	0.010453	0.003073	9	0.024653	0.011284	9
	1033.75	0.010369	0.002963	9	0.025344	0.011949	9
	1035	0.01038	0.00295	9	0.025244	0.011944	9
	1036.25	0.010479	0.003011	9	0.025391	0.01194	9
	1037.5	0.010518	0.00296	9	0.025813	0.012289	9
	1038.75	0.010505	0.002975	9	0.02595	0.012405	9
	1040	0.010531	0.003021	9	0.026004	0.012559	9
	1041.25	0.010344	0.002907	9	0.026181	0.012559	9
	1042.5	0.010339	0.002928	9	0.026213	0.012552	9
	1043.75	0.01046	0.002989	9	0.028889	0.015126	9
	1045	0.010441	0.002988	9	0.029457	0.01561	9
	1046.25	0.010456	0.002962	9	0.029676	0.015768	9
	1047.5	0.010434	0.002948	9	0.029716	0.015849	9
	1048.75	0.010585	0.003057	9	0.029698	0.01587	9
	1050	0.010554	0.003081	9	0.029817	0.015865	9
	1051.25	0.010629	0.003116	9	0.031321	0.017327	9
	1052.5	0.010635	0.00309	9	0.027333	0.013557	9
	1053.75	0.010651	0.003157	9	0.026787	0.012994	9
	1055	0.010648	0.003212	9	0.026773	0.012994	9
	1056.25	0.01072	0.003269	9	0.026702	0.012991	9
	1057.5	0.01078	0.003342	9	0.026251	0.012661	9
	1058.75	0.010788	0.00332	9	0.026174	0.012542	9
	1060	0.010717	0.00326	9	0.026061	0.012385	9
	1061.25	0.010824	0.003308	9	0.026011	0.012394	9
	1062.5	0.010751	0.003228	9	0.025997	0.012405	9
	1063.75	0.010695	0.003234	9	0.022488	0.009204	9
	1065	0.010741	0.00324	9	0.02168	0.008415	9
	1066.25	0.010702	0.00321	9	0.021261	0.008145	9
	1067.5	0.01063	0.003113	9	0.021098	0.007982	9
	1068.75	0.010526	0.003075	9	0.027841	0.01445	9
	1070	0.010593	0.003122	9	0.028116	0.014781	9
	1071.25	0.010549	0.00304	9	0.02641	0.013047	9
	1072.5	0.010641	0.003082	9	0.025702	0.012267	9
	1073.75	0.010668	0.003067	9	0.025603	0.012232	9
	1075	0.010606	0.003018	9	0.025607	0.012231	9
	1076.25	0.01057	0.002904	9	0.025541	0.012229	9
	1077.5	0.010508	0.002832	9	0.025598	0.012223	9
	1078.75	0.010452	0.002801	9	0.025565	0.012217	9
	1080	0.01052	0.002868	9	0.025648	0.01221	9
	1081.25	0.010475	0.002852	9	0.025572	0.012212	9
	1082.5	0.010463	0.00286	9	0.025564	0.012212	9
	1083.75	0.010509	0.002861	9	0.025575	0.012217	9
	1085	0.010527	0.0029	9	0.025496	0.012209	9
	1086.25	0.010527	0.0029	9	0.025548	0.012202	9
	1087.5	0.010612	0.002958	9	0.025556	0.012209	9
	1088.75	0.010686	0.002989	9	0.015589	0.003596	9
	1090	0.010569	0.002879	9	0.013234	0.003127	9
	1091.25	0.010586	0.002933	9	0.013119	0.003151	9
	1092.5	0.010543	0.00294	9	0.013049	0.003123	9
	1093.75	0.010647	0.002989	9	0.013029	0.003158	9
	1095	0.010661	0.002987	9	0.013071	0.003202	9
	1096.25	0.010622	0.002994	9	0.013116	0.003242	9
	1097.5	0.010588	0.003006	9	0.013072	0.003238	9
	1098.75	0.010698	0.003011	9	0.013057	0.003245	9
	1100	0.010615	0.002977	9	0.012981	0.003245	9
	1101.25	0.010568	0.00296	9	0.01292	0.003212	9
	1102.5	0.010574	0.002947	9	0.012924	0.003227	9
	1103.75	0.010519	0.002868	9	0.012973	0.003237	9
	1105	0.010584	0.00295	9	0.013075	0.00336	9
	1106.25	0.010569	0.002942	9	0.013112	0.00342	9
	1107.5	0.010586	0.002979	9	0.013074	0.003375	9
	1108.75	0.010585	0.002962	9	0.013211	0.003402	9
	1110	0.010665	0.003043	9	0.01318	0.003425	9
	1111.25	0.010655	0.003033	9	0.013287	0.003459	9
	1112.5	0.010698	0.003052	9	0.013331	0.003459	9
	1113.75	0.010541	0.002957	9	0.013384	0.003456	9
	1115	0.010484	0.002916	9	0.013488	0.003493	9
	1116.25	0.010539	0.002953	9	0.013556	0.003542	9
	1117.5	0.010589	0.002938	9	0.013617	0.003569	9
	1118.75	0.01051	0.002905	9	0.01357	0.00353	9
	1120	0.010472	0.002845	9	0.013592	0.003515	9
	1121.25	0.010565	0.002875	9	0.01363	0.003492	9
	1122.5	0.010662	0.00293	9	0.013617	0.003471	9
	1123.75	0.01076	0.003023	9	0.013759	0.003526	9
	1125	0.010693	0.002909	9	0.013776	0.003406	9
	1126.25	0.010864	0.003007	9	0.013763	0.003341	9
	1127.5	0.010789	0.00297	9	0.013894	0.003423	9
	1128.75	0.010704	0.002899	9	0.013724	0.003369	9
	1130	0.010657	0.002856	9	0.013687	0.003355	9
	1131.25	0.010627	0.0028	9	0.013626	0.00332	9
	1132.5	0.010673	0.002797	9	0.013537	0.003309	9
	1133.75	0.010691	0.002825	9	0.01358	0.003314	9
	1135	0.010678	0.002832	9	0.013432	0.003234	9
	1136.25	0.010645	0.002828	9	0.013437	0.003204	9
	1137.5	0.010596	0.002868	9	0.013448	0.0032	9
	1138.75	0.010571	0.002857	9	0.013551	0.003272	9
	1140	0.010614	0.002838	9	0.013416	0.003225	9
	1141.25	0.010524	0.002819	9	0.013446	0.003276	9
	1142.5	0.010538	0.002851	9	0.013395	0.003229	9
	1143.75	0.010452	0.002804	9	0.013255	0.003164	9
	1145	0.010418	0.00281	9	0.013088	0.003169	9
	1146.25	0.010368	0.002804	9	0.013211	0.003299	9
	1147.5	0.010429	0.00284	9	0.013103	0.003265	9
	1148.75	0.010452	0.002917	9	0.013238	0.003294	9
	1150	0.010426	0.002899	9	0.013256	0.003269	9
	1151.25	0.010449	0.002939	9	0.013292	0.003272	9
	1152.5	0.01036	0.002934	9	0.013365	0.003288	9
	1153.75	0.010391	0.00292	9	0.013307	0.003276	9
	1155	0.010378	0.002936	9	0.01331	0.003246	9
	1156.25	0.01036	0.002864	9	0.013202	0.003202	9
	1157.5	0.010316	0.002781	9	0.013236	0.003226	9
	1158.75	0.010323	0.002803	9	0.013213	0.003222	9
	1160	0.010407	0.002929	9	0.013354	0.003278	9
	1161.25	0.010421	0.002913	9	0.013358	0.003271	9
	1162.5	0.010349	0.002859	9	0.013385	0.003346	9
	1163.75	0.010432	0.002901	9	0.013328	0.003304	9
	1165	0.010456	0.002884	9	0.013259	0.003272	9
	1166.25	0.010373	0.0028	9	0.013148	0.003186	9
	1167.5	0.010304	0.002817	9	0.013127	0.00319	9
	1168.75	0.010236	0.002726	9	0.013116	0.003264	9
	1170	0.01037	0.002797	9	0.013078	0.00327	9
	1171.25	0.010327	0.002778	9	0.013018	0.003287	9
	1172.5	0.010398	0.002777	9	0.01298	0.003285	9
	1173.75	0.010292	0.002769	9	0.012966	0.003275	9
	1175	0.010316	0.002733	9	0.012973	0.003355	9
	1176.25	0.010417	0.002862	9	0.013033	0.003379	9
	1177.5	0.010524	0.002997	9	0.012887	0.003293	9
	1178.75	0.010622	0.003074	9	0.012874	0.003296	9
	1180	0.010612	0.003022	9	0.01288	0.003347	9
	1181.25	0.010621	0.003061	9	0.012755	0.003295	9
	1182.5	0.010564	0.002954	9	0.012716	0.003234	9
	1183.75	0.01053	0.002885	9	0.012833	0.003329	9
	1185	0.010525	0.00292	9	0.012958	0.003382	9
	1186.25	0.010496	0.002919	9	0.012899	0.003364	9
	1187.5	0.010599	0.002931	9	0.012848	0.003299	9
	1188.75	0.010683	0.002987	9	0.012753	0.003212	9
	1190	0.010609	0.002955	9	0.012851	0.003224	9
	1191.25	0.010651	0.002972	9	0.012905	0.003217	9
	1192.5	0.010715	0.003072	9	0.012943	0.003217	9
	1193.75	0.010817	0.003124	9	0.012899	0.003185	9
	1195	0.010815	0.003112	9	0.013021	0.003239	9
	1196.25	0.010663	0.003015	9	0.013056	0.003248	9
	1197.5	0.010614	0.00289	9	0.013111	0.003296	9
	1198.75	0.010586	0.002872	9	0.013086	0.003299	9
	1200	0.010536	0.002825	9	0.012962	0.00319	9
	1201.25	0.010635	0.002894	9	0.013088	0.003286	9
	1202.5	0.010698	0.002964	9	0.013206	0.003336	9
	1203.75	0.010626	0.002989	9	0.013247	0.003381	9
	1205	0.010506	0.002883	9	0.013273	0.003402	9
	1206.25	0.010488	0.002884	9	0.013319	0.003457	9
	1207.5	0.010388	0.002822	9	0.013361	0.003499	9
	1208.75	0.010332	0.002805	9	0.013302	0.00349	9
	1210	0.010307	0.002769	9	0.013257	0.003517	9
	1211.25	0.010255	0.002769	9	0.01334	0.003572	9
	1212.5	0.010195	0.002699	9	0.01333	0.003575	9
	1213.75	0.010167	0.002694	9	0.013461	0.003626	9
	1215	0.010248	0.002762	9	0.013375	0.003531	9
	1216.25	0.010263	0.002767	9	0.013363	0.00356	9
	1217.5	0.01021	0.002772	9	0.013402	0.003572	9
	1218.75	0.01013	0.002699	9	0.013444	0.003551	9
	1220	0.010144	0.002724	9	0.013529	0.003625	9
	1221.25	0.010033	0.002635	9	0.01342	0.003568	9
	1222.5	0.009959	0.002593	9	0.01331	0.003525	9
	1223.75	0.010008	0.002575	9	0.013232	0.003415	9
	1225	0.010126	0.002672	9	0.013148	0.003351	9
	1226.25	0.010245	0.002723	9	0.012981	0.003265	9
	1227.5	0.010256	0.002736	9	0.012972	0.003247	9
	1228.75	0.010252	0.002772	9	0.013071	0.003321	9
	1230	0.010382	0.002848	9	0.012991	0.003315	9
	1231.25	0.010339	0.002815	9	0.012907	0.003229	9
	1232.5	0.010282	0.002729	9	0.01289	0.003222	9
	1233.75	0.010239	0.002674	9	0.012814	0.003205	9
	1235	0.01024	0.002668	9	0.012678	0.003131	9
	1236.25	0.010318	0.002696	9	0.0127	0.003109	9
	1237.5	0.010355	0.002705	9	0.012709	0.003117	9
	1238.75	0.010313	0.002635	9	0.012652	0.003119	9
	1240	0.010428	0.002722	9	0.012617	0.00306	9
	1241.25	0.010414	0.002707	9	0.012636	0.003053	9
	1242.5	0.010483	0.002773	9	0.012724	0.003116	9
	1243.75	0.010487	0.002799	9	0.012746	0.003159	9
	1245	0.010526	0.002769	9	0.012782	0.003231	9
	1246.25	0.010462	0.002727	9	0.012911	0.003337	9
	1247.5	0.010515	0.002696	9	0.013029	0.003414	9
	1248.75	0.010576	0.002664	9	0.012967	0.00333	9
	1250	0.010465	0.002595	9	0.013146	0.003425	9
	1251.25	0.010529	0.002631	9	0.013166	0.003458	9
	1252.5	0.010542	0.002732	9	0.013195	0.003391	9
	1253.75	0.01061	0.00277	9	0.013272	0.003413	9
	1255	0.010481	0.002685	9	0.013502	0.003527	9
	1256.25	0.010452	0.002662	9	0.013627	0.003591	9
	1257.5	0.010378	0.00266	9	0.013681	0.003633	9
	1258.75	0.010381	0.002705	9	0.013738	0.003649	9
	1260	0.01025	0.002613	9	0.013847	0.003747	9
	1261.25	0.010221	0.00257	9	0.013867	0.003736	9
	1262.5	0.01014	0.002545	9	0.013835	0.003719	9
	1263.75	0.010127	0.002507	9	0.013811	0.003728	9
	1265	0.010055	0.002532	9	0.013888	0.003759	9
	1266.25	0.010046	0.002585	9	0.013854	0.003688	9
	1267.5	0.009956	0.002555	9	0.01384	0.003698	9
	1268.75	0.009823	0.002526	9	0.013884	0.003742	9
	1270	0.009854	0.002572	9	0.013769	0.00367	9
	1271.25	0.009818	0.002575	9	0.013679	0.003666	9
	1272.5	0.009856	0.002518	9	0.013708	0.003699	9
	1273.75	0.009786	0.002493	9	0.013551	0.003651	9
	1275	0.009861	0.002541	9	0.01343	0.003572	9
	1276.25	0.009839	0.002564	9	0.013233	0.003478	9
	1277.5	0.009937	0.0026	9	0.013107	0.003411	9
	1278.75	0.009935	0.002608	9	0.013095	0.003417	9
	1280	0.009931	0.002631	9	0.012962	0.003335	9
	1281.25	0.009977	0.002686	9	0.012992	0.003383	9
	1282.5	0.010059	0.00273	9	0.013117	0.003426	9
	1283.75	0.010039	0.002692	9	0.013201	0.003487	9
	1285	0.010005	0.002623	9	0.013103	0.003432	9
	1286.25	0.010068	0.002586	9	0.013142	0.003473	9
	1287.5	0.010317	0.002795	9	0.013147	0.003438	9
	1288.75	0.010495	0.002865	9	0.013132	0.003461	9
	1290	0.010526	0.002854	9	0.013141	0.003478	9
	1291.25	0.010592	0.002889	9	0.013182	0.003433	9
	1292.5	0.010613	0.002908	9	0.013135	0.003446	9
	1293.75	0.010639	0.002889	9	0.013204	0.003482	9
	1295	0.010599	0.002906	9	0.013216	0.003596	9
	1296.25	0.010556	0.002847	9	0.013322	0.003657	9
[truncated: 3,763 more rows]
