# Supplementary material for: Microglia facilitate and stabilize the response to general anesthesia via modulating the neuronal network in a brain region-specific manner
Source: eLife. 2023 Dec 22;12:RP92252. doi: 10.7554/eLife.92252 (PMC10746144; doi:10.7554/eLife.92252)
Supplement: Figure 4—source data 4. [file elife-92252-fig4-data4.xlsx]

## Sheet: Figure 4F
		Consciousness (%)
		D7			D21
	Time after pentobarbital injection	Mean	SEM	N	Mean	SEM	N
	-1200	88.6714	5.79083	7	67.939	8.73657	7
	-1196	88.6714	5.79083	7	68.5411	8.59799	7
	-1192	88.6714	5.79083	7	69.7261	8.28882	7
	-1188	88.6714	5.79083	7	70.1619	8.15657	7
	-1184	88.6714	5.79083	7	70.5519	8.04782	7
	-1180	88.6714	5.79083	7	70.9029	7.958	7
	-1176	88.6714	5.79083	7	71.2204	7.88355	7
	-1172	88.1753	5.77034	7	72.0143	7.69388	7
	-1168	87.7224	5.76312	7	72.7391	7.5257	7
	-1164	87.3071	5.76616	7	73.4036	7.37602	7
	-1160	86.9251	5.77711	7	74.0149	7.24232	7
	-1156	86.5742	5.74729	7	74.5791	7.12253	7
	-1152	86.2492	5.72872	7	75.1016	7.01485	7
	-1148	85.9459	5.74129	7	75.1898	7.0023	7
	-1144	85.6636	5.75847	7	75.2719	6.99373	7
	-1140	85.4	5.77923	7	75.3486	6.98845	7
	-1136	85.0362	5.81033	7	75.719	6.92987	7
	-1132	84.6724	5.84826	7	76.0895	6.87649	7
	-1128	84.3086	5.8929	7	76.46	6.82843	7
	-1124	83.9448	5.94409	7	76.8305	6.78582	7
	-1120	83.581	6.00167	7	77.5714	6.65805	7
	-1116	83.581	6.00167	7	78.3124	6.5383	7
	-1112	83.581	6.00167	7	79.0533	6.42702	7
	-1108	83.581	6.00167	7	79.7943	6.32466	7
	-1104	83.581	6.00167	7	80.1648	6.30671	7
	-1100	82.8414	5.95372	7	80.5352	6.29493	7
	-1096	82.1019	5.9171	7	81.2762	6.21256	7
	-1092	81.3624	5.89201	7	82.0171	6.14028	7
	-1088	81	5.89344	7	82.3876	6.14578	7
	-1084	80.6376	5.90188	7	82.7581	6.15764	7
	-1080	80.2752	5.91727	7	83.1286	6.17583	7
	-1076	79.9129	5.93959	7	83.499	6.20029	7
	-1072	79.5505	5.96874	7	83.499	6.20029	7
	-1068	79.1881	6.00463	7	83.8695	6.13122	7
	-1064	78.8257	6.04713	7	84.24	6.06782	7
	-1060	78.4633	6.09612	7	84.6105	6.01027	7
	-1056	78.1009	6.15143	7	84.2467	5.97411	7
	-1052	78.1024	6.17237	7	83.5124	6.00139	7
	-1048	78.1038	6.20843	7	82.7781	6.04044	7
	-1044	78.1052	6.25935	7	82.0438	6.09104	7
	-1040	78.1067	6.32477	7	82.0438	6.09104	7
	-1036	78.469	6.24076	7	82.0438	6.09104	7
	-1032	78.8314	6.1623	7	82.0438	6.09104	7
	-1028	79.1952	6.1491	7	82.4143	6.02348	7
	-1024	79.559	6.14254	7	82.7848	5.96174	7
	-1020	79.9229	6.14264	7	83.1552	5.90599	7
	-1016	80.2867	6.14939	7	83.1552	5.90599	7
	-1012	80.6505	6.16279	7	83.1552	5.90599	7
	-1008	81.0143	6.18277	7	83.1552	5.90599	7
	-1004	81.3781	6.20929	7	83.9029	5.6755	7
	-1000	81.7419	6.24225	7	84.28	5.49543	7
	-996	81.7419	6.24225	7	84.2867	5.3728	7
	-992	81.7419	6.24225	7	84.2933	5.26319	7
	-988	81.7419	6.24225	7	84.3	5.16742	7
	-984	81.7419	6.24225	7	84.3067	5.08629	7
	-980	82.4814	6.18004	7	84.3133	5.0205	7
	-976	83.221	6.12852	7	84.32	4.97066	7
	-972	83.9605	6.08794	7	84.3267	4.93725	7
	-968	84.3229	6.02463	7	84.7038	4.79703	7
	-964	84.6852	5.96756	7	85.081	4.66061	7
	-960	85.4252	5.73587	7	85.8286	4.40109	7
	-956	86.1652	5.50708	7	86.2057	4.26873	7
	-952	86.9052	5.28157	7	86.5829	4.14118	7
	-948	87.6452	5.0598	7	86.96	4.01888	7
	-944	88.3852	4.84226	7	87.3371	3.90234	7
	-940	89.1252	4.62957	7	87.7143	3.79209	7
	-936	89.8652	4.4224	7	88.8257	3.53537	7
	-932	90.6052	4.22159	7	89.9371	3.28586	7
	-928	91.3452	4.02807	7	91.0486	3.04531	7
	-924	92.0852	3.84296	7	92.16	2.81604	7
	-920	92.8252	3.66753	7	92.5371	2.71608	7
	-916	93.2029	3.4745	7	92.9143	2.62657	7
	-912	93.5805	3.28147	7	93.2914	2.54862	7
	-908	93.9581	3.08844	7	93.6686	2.4833	7
	-904	94.3357	2.89542	7	94.0457	2.43165	7
	-900	94.7133	2.70239	7	94.4229	2.39455	7
	-896	95.091	2.50936	7	95.1705	2.17754	7
	-892	95.1062	2.3023	7	95.9181	1.97202	7
	-888	95.1214	2.11638	7	96.6657	1.782	7
	-884	95.1367	1.95763	7	96.6657	1.782	7
	-880	95.1519	1.83312	7	96.6657	1.782	7
	-876	95.1671	1.75017	7	97.0362	1.584	7
	-872	95.1824	1.71483	7	97.4067	1.386	7
	-868	95.1976	1.73002	7	97.7771	1.188	7
	-864	95.2129	1.79445	7	98.1476	0.989998	7
	-860	95.5905	1.71914	7	98.5181	0.791998	7
	-856	95.9681	1.66293	7	98.8886	0.593999	7
	-852	96.3457	1.62781	7	99.2591	0.395999	7
	-848	96.7233	1.61515	7	99.6295	0.198	7
	-844	97.1009	1.62547	7	100	0	7
	-840	97.1009	1.62547	7	100	0	7
	-836	97.1009	1.62547	7	100	0	7
	-832	97.1009	1.62547	7	100	0	7
	-828	97.1009	1.62547	7	100	0	7
	-824	97.1009	1.62547	7	100	0	7
	-820	97.1009	1.62547	7	100	0	7
	-816	97.1009	1.62547	7	100	0	7
	-812	97.1009	1.62547	7	100	0	7
	-808	97.1009	1.62547	7	100	0	7
	-804	97.1009	1.62547	7	100	0	7
	-800	97.1009	1.62547	7	100	0	7
	-796	97.1009	1.62547	7	100	0	7
	-792	97.1009	1.62547	7	100	0	7
	-788	97.1009	1.62547	7	100	0	7
	-784	97.1009	1.62547	7	100	0	7
	-780	97.1009	1.62547	7	100	0	7
	-776	97.1009	1.62547	7	100	0	7
	-772	97.4633	1.42229	7	100	0	7
	-768	97.8257	1.2191	7	100	0	7
	-764	98.1881	1.01592	7	100	0	7
	-760	98.5505	0.812736	7	100	0	7
	-756	98.5333	0.616713	7	100	0	7
	-752	98.5162	0.524189	7	100	0	7
	-748	98.8786	0.411766	7	100	0	7
	-744	99.2409	0.38327	7	100	0	7
	-740	99.2409	0.38327	7	100	0	7
	-736	99.2409	0.38327	7	100	0	7
	-732	99.2409	0.38327	7	100	0	7
	-728	99.2409	0.38327	7	100	0	7
	-724	99.2409	0.38327	7	100	0	7
	-720	99.2409	0.38327	7	100	0	7
	-716	98.8786	0.411766	7	99.6295	0.198	7
	-712	98.5162	0.524189	7	99.2591	0.395999	7
	-708	98.1538	0.680121	7	98.8886	0.593999	7
	-704	97.7914	0.856109	7	98.5181	0.791998	7
	-700	97.4291	1.04204	7	98.1476	0.989998	7
	-696	97.0667	1.23343	7	98.1476	0.989998	7
	-692	96.7043	1.42808	7	98.1476	0.989998	7
	-688	96.3419	1.62482	7	97.7681	0.982071	7
	-684	95.9795	1.82297	7	97.3886	1.01108	7
	-680	95.6171	2.02212	7	97.3886	1.01108	7
	-676	95.2548	2.22201	7	97.3886	1.01108	7
	-672	94.8924	2.42244	7	97.0181	1.1969	7
	-668	94.53	2.62329	7	96.6476	1.3861	7
	-664	94.1676	2.82448	7	96.2771	1.57747	7
	-660	93.8052	3.02594	7	95.9067	1.77029	7
	-656	93.4429	3.22761	7	95.5362	1.96414	7
	-652	93.0805	3.42946	7	95.1657	2.15875	7
	-648	92.7181	3.63146	7	94.7952	2.35392	7
	-644	92.3557	3.83358	7	94.4248	2.54953	7
	-640	91.9933	4.03582	7	94.0543	2.74548	7
	-636	92.0105	4.2482	7	93.6838	2.9417	7
	-632	92.0276	4.47004	7	93.3133	3.13815	7
	-628	91.6652	4.67323	7	92.5657	3.31977	7
	-624	91.3029	4.87641	7	91.8181	3.51186	7
	-620	91.3029	4.87641	7	91.0705	3.7128	7
	-616	91.3029	4.87641	7	90.3229	3.92122	7
	-612	91.3029	4.87641	7	89.5752	4.136	7
	-608	91.3029	4.87641	7	88.8276	4.3562	7
	-604	91.3029	4.87641	7	88.4505	4.39213	7
	-600	91.3029	4.87641	7	88.0733	4.43621	7
	-596	91.6652	4.67323	7	88.0667	4.30594	7
	-592	92.0276	4.47004	7	88.06	4.19156	7
	-588	92.39	4.26686	7	88.0533	4.09441	7
	-584	92.7524	4.06368	7	88.0467	4.01575	7
	-580	93.1148	3.86049	7	88.04	3.95667	7
	-576	93.4771	3.65731	7	87.6629	4.06541	7
	-572	93.8395	3.45413	7	87.2857	4.18027	7
	-568	93.8395	3.45413	7	87.2881	4.32733	7
	-564	93.8395	3.45413	7	87.2905	4.48835	7
	-560	93.8395	3.45413	7	86.9133	4.61919	7
	-556	93.8395	3.45413	7	86.5362	4.75429	7
	-552	93.8395	3.45413	7	86.1657	4.73718	7
	-548	93.8395	3.45413	7	85.7952	4.74536	7
	-544	93.4681	3.43561	7	85.4248	4.77871	7
	-540	93.0967	3.42837	7	85.0543	4.8367	7
	-536	93.0967	3.42837	7	84.6838	4.91847	7
	-532	93.0967	3.42837	7	84.3133	5.02285	7
	-528	93.0967	3.42837	7	83.5724	5.20504	7
	-524	93.0967	3.42837	7	82.8314	5.39323	7
	-520	93.0967	3.42837	7	82.8248	5.51381	7
	-516	93.0967	3.42837	7	82.8181	5.64662	7
	-512	93.0967	3.42837	7	82.8114	5.79081	7
	-508	93.0967	3.42837	7	83.1819	5.76358	7
	-504	93.0967	3.42837	7	83.5524	5.74306	7
	-500	92.7343	3.63029	7	83.9229	5.72931	7
	-496	92.3719	3.83235	7	84.2933	5.72238	7
	-492	92.0095	4.03453	7	84.6638	5.72229	7
	-488	91.6471	4.2368	7	85.0343	5.72906	7
	-484	91.2848	4.43915	7	85.0343	5.72906	7
	-480	90.9224	4.64158	7	85.0343	5.72906	7
	-476	90.56	4.84406	7	85.0343	5.72906	7
	-472	90.1976	5.04661	7	84.6638	5.72229	7
	-468	89.8352	5.2492	7	84.2933	5.72238	7
	-464	89.4729	5.45184	7	83.9229	5.72931	7
	-460	89.1105	5.65452	7	83.5524	5.74306	7
	-456	88.7481	5.85723	7	83.1819	5.76358	7
	-452	88.3857	6.05998	7	83.1819	5.76358	7
	-448	88.3857	6.05998	7	83.1819	5.76358	7
	-444	88.3857	6.05998	7	83.1819	5.76358	7
	-440	88.0238	6.03531	7	83.1819	5.76358	7
	-436	87.6619	6.01743	7	83.1819	5.76358	7
	-432	87.3	6.00639	7	83.5457	5.74856	7
	-428	86.9381	6.00223	7	83.9095	5.74064	7
	-424	86.9476	6.02417	7	84.2733	5.73984	7
	-420	86.9571	6.0611	7	84.6371	5.74616	7
	-416	86.5952	6.07923	7	84.2667	5.77636	7
	-412	86.2333	6.10409	7	83.8962	5.81315	7
	-408	85.8714	6.1356	7	84.6305	5.79044	7
	-404	85.5095	6.17366	7	85.3648	5.78007	7
	-400	85.1476	6.21815	7	85.3648	5.78007	7
	-396	84.7857	6.26893	7	85.0014	5.75423	7
	-392	84.4238	6.32585	7	84.6381	5.73543	7
	-388	84.0467	6.2995	7	84.6381	5.73543	7
	-384	83.6695	6.27899	7	84.6381	5.73543	7
	-380	83.2924	6.26439	7	85.0152	5.54791	7
	-376	82.5533	6.31718	7	85.3924	5.36081	7
	-372	81.8143	6.38084	7	85.7695	5.17417	7
	-368	81.0752	6.45503	7	86.1467	4.98804	7
	-364	80.3362	6.5394	7	86.16	4.78193	7
	-360	79.5971	6.63356	7	86.1733	4.58642	7
	-356	79.2352	6.72039	7	86.1867	4.40293	7
	-352	78.8733	6.8122	7	86.5705	4.19872	7
	-348	78.5114	6.90878	7	86.9543	4.01698	7
	-344	77.7724	7.02451	7	87.3381	3.86089	7
	-340	77.0333	7.14845	7	87.7219	3.73367	7
	-336	76.6714	7.25674	7	88.1057	3.63835	7
	-332	76.3095	7.36907	7	88.1191	3.56207	7
	-328	75.9476	7.48524	7	88.1324	3.51015	7
	-324	75.5762	7.44394	7	87.7686	3.61927	7
	-320	75.5667	7.29176	7	87.4048	3.73617	7
	-316	75.1952	7.26084	7	87.0409	3.86014	7
	-312	75.1952	7.26084	7	86.6771	3.99051	7
	-308	75.1952	7.26084	7	86.6771	3.99051	7
	-304	75.1952	7.26084	7	86.6771	3.99051	7
	-300	75.1952	7.26084	7	86.6771	3.99051	7
	-296	75.1952	7.26084	7	87.4114	3.87779	7
	-292	75.1952	7.26084	7	88.1457	3.78072	7
	-288	75.1952	7.26084	7	88.1457	3.78072	7
	-284	75.1952	7.26084	7	88.1457	3.78072	7
	-280	75.1952	7.26084	7	88.1457	3.78072	7
	-276	75.1952	7.26084	7	88.1467	3.77271	7
	-272	75.1952	7.26084	7	88.1476	3.78909	7
	-268	74.831	7.32332	7	87.4214	3.90459	7
	-264	74.8286	7.28142	7	86.6952	4.03489	7
	-260	74.8262	7.25103	7	86.3181	4.15625	7
	-256	75.1857	7.11437	7	85.941	4.28292	7
	-252	75.5452	6.9932	7	85.5638	4.41442	7
	-248	75.9129	6.87117	7	84.8071	4.51226	7
	-244	76.2805	6.76615	7	84.4143	4.51832	7
	-240	76.6481	6.67894	7	84.0214	4.5522	7
	-236	76.6386	6.57864	7	83.6286	4.61329	7
	-232	76.6291	6.49085	7	83.6152	4.70661	7
	-228	76.6195	6.41609	7	83.6019	4.81707	7
	-224	76.9871	6.38781	7	83.5886	4.9435	7
	-220	77.3548	6.37979	7	83.5752	5.08472	7
	-216	77.3452	6.34714	7	83.5619	5.23954	7
	-212	77.7071	6.29039	7	83.5486	5.40678	7
	-208	78.0691	6.23976	7	83.5352	5.58533	7
	-204	78.061	6.20091	7	83.5195	5.58049	7
	-200	78.0529	6.17554	7	83.14	5.58189	7
	-196	78.4067	6.11799	7	83.14	5.58189	7
	-192	78.389	6.09394	7	83.14	5.58189	7
	-188	78	6.10424	7	82.7762	5.58002	7
	-184	77.611	6.13511	7	82.4124	5.58548	7
	-180	77.6014	6.15375	7	82.4124	5.58548	7
	-176	77.5919	6.18708	7	82.4124	5.58548	7
	-172	78.3162	6.01137	7	82.4124	5.58548	7
	-168	79.0405	5.84271	7	82.4124	5.58548	7
	-164	79.7648	5.68174	7	82.4124	5.58548	7
	-160	80.4891	5.52912	7	82.41	5.40916	7
	-156	80.8362	5.34485	7	82.77	5.25364	7
	-152	81.1833	5.17832	7	82.7529	5.29674	7
	-148	81.5386	5.06149	7	83.0995	5.34862	7
	-144	81.5319	4.93245	7	83.8233	5.24747	7
	-140	81.5252	4.83649	7	84.2005	5.07237	7
	-136	81.5276	4.821	7	84.5776	4.89863	7
	-132	81.53	4.82313	7	84.5752	4.78526	7
	-128	81.5243	4.74841	7	84.9524	4.61802	7
	-124	81.5186	4.69052	7	85.3295	4.45289	7
	-120	81.1414	4.726	7	85.7067	4.29013	7
	-116	80.7643	4.76907	7	86.4633	4.05672	7
	-112	80.3871	4.81952	7	86.8405	3.89531	7
	-108	80.01	4.87712	7	86.4767	3.90985	7
	-104	80.3814	4.80611	7	85.7405	3.90375	7
	-100	80.7529	4.74226	7	85.0043	3.91611	7
	-96	81.1243	4.68586	7	84.6319	3.90388	7
	-92	81.1243	4.68586	7	85.0091	3.7543	7
	-88	81.4867	4.53327	7	85.3862	3.60887	7
	-84	82.2286	4.3864	7	86.1429	3.39209	7
	-80	82.9705	4.25062	7	87.2633	3.12949	7
	-76	83.7124	4.12705	7	88.0043	2.94287	7
	-72	84.4543	4.0168	7	88.7452	2.76738	7
	-68	85.5676	3.84927	7	89.4862	2.60527	7
	-64	86.6809	3.69824	7	90.2271	2.4592	7
	-60	87.4148	3.51322	7	90.6043	2.32733	7
	-56	88.1486	3.33906	7	90.9814	2.20455	7
	-52	88.1486	3.33906	7	91.3586	2.09246	7
	-48	88.1486	3.33906	7	91.7357	1.99287	7
	-44	88.1486	3.33906	7	92.1129	1.90774	7
	-40	88.1486	3.33906	7	92.4924	1.7666	7
	-36	88.5257	3.22239	7	92.8719	1.63576	7
	-32	88.9029	3.11337	7	93.6286	1.42001	7
	-28	89.6514	2.96123	7	94.3852	1.2187	7
	-24	90.0252	2.78848	7	94.7648	1.11366	7
	-20	90.3991	2.65101	7	94.7648	1.11366	7
	-16	91.1386	2.40934	7	94.7648	1.11366	7
	-12	91.8781	2.17269	7	95.1443	1.03377	7
	-8	92.6176	1.94287	7	95.5238	0.985183	7
	-4	92.9824	1.73356	7	95.9033	0.972591	7
	0	93.7186	1.53041	7	96.2829	0.997361	7
	4	94.4548	1.41082	7	96.2829	0.997361	7
	8	95.191	1.39645	7	96.2829	0.997361	7
	12	95.9271	1.49033	7	97.0238	0.807613	7
	16	95.5352	1.57989	7	98.1371	0.521087	7
	20	95.1433	1.74033	7	99.2505	0.260308	7
	24	94.7514	1.95426	7	100	0	7
	28	94.3595	2.20618	7	100	0	7
	32	93.6052	2.44027	7	100	0	7
	36	93.2257	2.50408	7	100	0	7
	40	92.8462	2.58058	7	100	0	7
	44	92.4667	2.66866	7	100	0	7
	48	92.0919	2.83091	7	100	0	7
	52	91.7171	2.99707	7	100	0	7
	56	91.3424	3.16652	7	100	0	7
	60	90.6057	3.30018	7	100	0	7
	64	89.8691	3.44736	7	100	0	7
	68	89.4943	3.62312	7	100	0	7
	72	89.1195	3.80076	7	100	0	7
	76	88.7448	3.98003	7	100	0	7
	80	88.0081	4.14075	7	99.6367	0.202598	7
	84	86.5352	4.24663	7	98.9009	0.425901	7
	88	84.6852	4.33715	7	98.1652	0.678035	7
	92	83.2067	4.46958	7	96.6986	0.800132	7
	96	81.7233	4.47376	7	95.2319	1.00963	7
	100	80.9667	4.49864	7	93.7652	1.26378	7
	104	79.8352	4.70899	7	92.2986	1.54065	7
	108	78.7038	4.92782	7	90.4614	1.77037	7
	112	77.5724	5.15403	7	88.6243	2.02259	7
	116	76.8157	5.21982	7	87.1505	2.17451	7
	120	75.6952	5.24523	7	85.6767	2.35824	7
	124	73.8481	5.25483	7	84.5667	2.5053	7
	128	72.001	5.28276	7	83.4567	2.67827	7
	132	70.1538	5.32874	7	81.2457	2.89293	7
	136	68.6862	5.31868	7	78.6624	3.06698	7
	140	67.5981	5.26306	7	76.4424	3.18863	7
	144	66.51	5.23987	7	74.2224	3.33178	7
	148	65.0424	5.29265	7	72.0114	3.56755	7
	152	63.5748	5.3632	7	70.1643	3.76481	7
	156	61.7324	5.57692	7	68.3171	3.97722	7
	160	60.2519	5.76757	7	66.0976	4.15677	7
	164	58.7714	5.96921	7	63.8781	4.34949	7
	168	57.2862	6.08216	7	61.6586	4.55372	7
	172	55.801	6.20816	7	59.4391	4.76796	7
	176	54.3157	6.34644	7	57.2195	4.99094	7
	180	53.1924	6.48948	7	55	5.22154	7
	184	52.4486	6.61612	7	52.7805	5.45878	7
	188	50.9809	6.74941	7	50.5609	5.70184	7
	192	49.5133	6.89433	7	48.3414	5.95001	7
	196	48.0457	7.05017	7	46.1219	6.20268	7
	200	46.94	7.2095	7	44.2657	6.40187	7
	204	46.191	7.43365	7	42.7819	6.61294	7
	208	45.819	7.59634	7	41.2981	6.83168	7
	212	44.7043	7.5895	7	39.7952	6.71692	7
	216	43.9691	7.55747	7	38.2924	6.62857	7
	220	42.8691	7.5801	7	36.7895	6.56769	7
	224	41.7691	7.6146	7	35.2867	6.53506	7
	228	40.3071	7.6544	7	34.5248	6.5574	7
	232	38.1052	7.49428	7	34.1333	6.53593	7
	236	36.2652	7.34511	7	33.3786	6.58275	7
	240	34.7891	7.13132	7	32.9976	6.62493	7
	244	34.0395	6.86735	7	32.2457	6.58171	7
	248	33.6552	6.63936	7	31.4938	6.54874	7
	252	33.2709	6.42292	7	31.4795	6.61186	7
	256	32.8867	6.21925	7	31.4638	6.6796	7
	260	31.7605	5.92527	7	31.0848	6.80287	7
	264	30.6343	5.64792	7	30.7124	6.76737	7
	268	29.9024	5.35988	7	30.331	6.74008	7
	272	29.1705	5.08574	7	29.9495	6.7317	7
	276	28.4386	4.82787	7	29.5681	6.74231	7
	280	27.3448	4.54919	7	29.559	6.70825	7
	284	25.8714	4.27686	7	29.1795	6.6928	7
	288	24.3981	4.01113	7	28.8	6.68281	7
	292	23.3043	3.78079	7	28.4205	6.67831	7
	296	22.2105	3.58399	7	28.0409	6.6793	7
	300	21.4791	3.55132	7	27.6614	6.68579	7
	304	20.3681	3.48814	7	27.2819	6.69776	7
	308	19.6191	3.44046	7	26.9024	6.71518	7
	312	18.4905	3.34062	7	26.5229	6.738	7
	316	17.3619	3.26346	7	26.1433	6.76618	7
	320	16.6129	3.2677	7	26.1271	6.76085	7
	324	16.2433	3.36146	7	26.1109	6.76863	7
	328	15.8738	3.48773	7	26.0948	6.78948	7
	332	15.4962	3.49051	7	27.199	6.89157	7
	336	15.1186	3.50394	7	28.3033	7.00506	7
	340	14.379	3.52002	7	29.0443	7.14009	7
	344	14.0191	3.65059	7	29.7852	7.28206	7
	348	14.0209	3.79522	7	30.1557	7.29913	7
	352	14.0209	3.79522	7	29.7852	7.28206	7
	356	13.6591	3.80947	7	29.4148	7.27035	7
	360	13.2971	3.83447	7	28.6705	7.2937	7
	364	13.2976	4.01874	7	27.9333	7.34301	7
	368	12.9329	4.01745	7	27.1962	7.40131	7
	372	12.5681	4.02628	7	26.8224	7.4445	7
	376	12.5829	4.15303	7	26.8224	7.4445	7
	380	12.96	4.44361	7	26.4586	7.32127	7
	384	13.3371	4.74428	7	26.4586	7.32127	7
	388	13.6995	4.89489	7	26.4586	7.32127	7
	392	13.6824	4.94752	7	26.0948	7.20162	7
	396	13.6652	5.01703	7	25.3605	7.07837	7
	400	13.6481	5.10273	7	24.6262	6.96274	7
	404	14.0105	5.2771	7	24.2624	6.853	7
	408	14.3729	5.45347	7	24.2691	6.75212	7
	412	13.9933	5.38345	7	24.6495	6.6212	7
	416	13.9933	5.38345	7	25.03	6.50813	7
	420	13.631	5.20382	7	25.0367	6.44526	7
	424	13.631	5.20382	7	25.0433	6.39618	7
	428	13.631	5.20382	7	24.6795	6.32207	7
	432	14.0105	5.2771	7	24.3157	6.25363	7
	436	14.39	5.35623	7	23.9519	6.19104	7
	440	14.39	5.35623	7	23.2248	6.15376	7
	444	14.0105	5.2771	7	22.4976	6.12764	7
	448	13.631	5.20382	7	21.7705	6.11283	7
	452	13.2686	5.02599	7	20.6729	6.06579	7
	456	13.2857	4.93057	7	19.949	6.01267	7
	460	13.3029	4.8513	7	19.5886	5.93672	7
	464	12.9405	4.68851	7	19.2281	5.88129	7
	468	12.1986	4.42987	7	18.4938	5.84294	7
	472	12.561	4.59385	7	18.4938	5.84294	7
	476	12.9233	4.76085	7	18.4938	5.84294	7
	480	13.2857	4.93057	7	18.8676	5.84695	7
	484	13.2857	4.93057	7	18.8776	5.84836	7
	488	13.2857	4.93057	7	18.8876	5.86521	7
	492	13.2857	4.93057	7	18.8976	5.89737	7
	496	12.5438	4.67651	7	18.5338	5.911	7
	500	11.8019	4.42339	7	18.5338	5.911	7
	504	11.06	4.17138	7	18.901	5.91615	7
	508	10.3181	3.92069	7	19.2681	5.94282	7
	512	10.3181	3.92069	7	19.6352	5.99072	7
	516	10.3181	3.92069	7	20.009	6.04225	7
	520	10.3181	3.92069	7	20.009	6.04225	7
	524	10.3181	3.92069	7	20.009	6.04225	7
	528	10.3181	3.92069	7	19.2681	5.8739	7
	532	10.3181	3.92069	7	18.1533	5.65525	7
	536	9.93857	3.85249	7	17.0386	5.44454	7
	540	9.55905	3.79276	7	16.6614	5.31005	7
	544	8.81714	3.55276	7	16.6548	5.15932	7
	548	8.43762	3.50757	7	17.0186	4.99017	7
	552	8.05809	3.47237	7	17.0119	4.86572	7
	556	7.67857	3.44749	7	17.3757	4.91886	7
	560	7.29905	3.43315	7	17.7395	4.97965	7
	564	7.29905	3.43315	7	18.1033	5.04782	7
	568	7.29905	3.43315	7	18.4671	5.12308	7
	572	7.66143	3.63366	7	18.0967	4.97007	7
	576	7.64429	3.83358	7	17.3524	4.77125	7
	580	7.26476	3.84229	7	16.6081	4.57907	7
	584	6.88524	3.86049	7	15.8638	4.3944	7
	588	7.24762	4.06368	7	15.4933	4.24938	7
	592	7.24762	4.06368	7	14.7591	4.0041	7
	596	7.24762	4.06368	7	14.0248	3.76191	7
	600	6.88524	3.86049	7	13.2805	3.57882	7
	604	6.52286	3.65731	7	12.9	3.52402	7
	608	6.16048	3.45413	7	12.5262	3.50238	7
	612	6.16048	3.45413	7	12.1524	3.49159	7
	616	6.52286	3.65731	7	11.7819	3.36021	7
	620	6.88524	3.86049	7	11.4114	3.2356	7
	624	7.24762	4.06368	7	10.3033	2.9716	7
	628	7.61	4.26686	7	9.19524	2.71556	7
	632	7.61	4.26686	7	8.08714	2.46994	7
	636	7.61	4.26686	7	7.34286	2.38669	7
	640	7.24762	4.06368	7	6.97238	2.28278	7
	644	6.88524	3.86049	7	7.33952	2.33277	7
	648	6.52286	3.65731	7	8.07714	2.49307	7
	652	6.88524	3.86049	7	8.81476	2.66927	7
	656	7.24762	4.06368	7	9.55238	2.85843	7
	660	7.61	4.26686	7	9.92619	2.88021	7
	664	7.61	4.26686	7	9.92952	2.94216	7
	668	7.62714	4.04523	7	9.55905	2.98225	7
	672	7.64429	3.83358	7	9.55905	2.98225	7
	676	7.28191	3.63146	7	8.82476	2.76209	7
	680	6.91952	3.42946	7	8.46429	2.61552	7
	684	6.55714	3.22761	7	8.10381	2.51208	7
	688	6.55714	3.22761	7	7.74333	2.45723	7
	692	6.93667	3.23297	7	7.74333	2.45723	7
	696	7.31619	3.24963	7	7.74333	2.45723	7
	700	7.67857	3.44749	7	7.74333	2.45723	7
	704	8.04095	3.64594	7	8.11381	2.4662	7
	708	8.04095	3.64594	7	8.8481	2.63243	7
	712	8.04095	3.64594	7	9.58238	2.8144	7
	716	8.04095	3.64594	7	10.3167	3.00923	7
	720	8.40333	3.84488	7	10.6871	3.06402	7
	724	8.76571	4.04425	7	11.0576	3.1304	7
	728	9.1281	4.24397	7	11.4214	3.27666	7
	732	8.76571	4.04425	7	12.1591	3.5006	7
	736	8.40333	3.84488	7	13.2671	3.78908	7
	740	8.04095	3.64594	7	13.631	3.93815	7
	744	7.67857	3.44749	7	13.631	3.93815	7
	748	7.31619	3.24963	7	13.631	3.93815	7
	752	6.95381	3.05247	7	13.631	3.93815	7
	756	6.59143	2.85615	7	13.631	3.93815	7
	760	6.59143	2.85615	7	13.631	3.93815	7
	764	6.59143	2.85615	7	12.8933	3.71493	7
	768	6.59143	2.85615	7	12.1557	3.49691	7
	772	6.22905	2.66086	7	11.4181	3.28513	7
	776	5.86667	2.46685	7	11.0443	3.23157	7
	780	5.50429	2.27444	7	10.6705	3.18914	7
	784	5.86667	2.46685	7	9.93286	3.00018	7
	788	5.84952	2.63519	7	9.56905	2.84767	7
	792	5.47	2.62329	7	9.20524	2.70171	7
	796	5.47	2.62329	7	9.56905	2.84767	7
	800	5.47	2.62329	7	9.55905	2.97837	7
	804	5.47	2.62329	7	9.54905	3.13258	7
	808	5.10762	2.42244	7	9.53905	3.30701	7
	812	4.36571	2.22027	7	9.90286	3.47957	7
	816	3.62381	2.03184	7	10.2667	3.65519	7
	820	3.26143	1.82865	7	10.6305	3.83343	7
	824	2.89905	1.62547	7	10.6238	3.95212	7
	828	2.53667	1.42229	7	10.6238	3.95212	7
	832	2.17429	1.2191	7	10.6238	3.95212	7
	836	1.81191	1.01592	7	10.6238	3.95212	7
	840	1.44952	0.812736	7	10.6238	3.95212	7
	844	1.08714	0.609552	7	10.6238	3.95212	7
	848	1.10429	0.428054	7	10.6238	3.95212	7
	852	1.48381	0.524189	7	9.51571	3.72988	7
	856	1.86333	0.663149	7	8.40762	3.51957	7
	860	1.86333	0.663149	7	8.04381	3.3297	7
	864	1.86333	0.663149	7	8.04381	3.3297	7
	868	1.86333	0.663149	7	8.04381	3.3297	7
	872	1.86333	0.663149	7	8.04381	3.3297	7
	876	1.86333	0.663149	7	8.04381	3.3297	7
	880	1.86333	0.663149	7	8.04381	3.3297	7
	884	1.86333	0.663149	7	8.04381	3.3297	7
	888	1.86333	0.663149	7	8.04381	3.3297	7
	892	1.86333	0.663149	7	8.04381	3.3297	7
	896	1.86333	0.663149	7	7.68	3.14138	7
	900	1.86333	0.663149	7	7.31619	2.95492	7
	904	1.50095	0.586394	7	7.68	3.14138	7
	908	1.13857	0.574905	7	8.04381	3.3297	7
	912	1.13857	0.574905	7	8.40762	3.51957	7
	916	1.13857	0.574905	7	8.40762	3.51957	7
	920	1.13857	0.574905	7	8.40762	3.51957	7
	924	1.13857	0.574905	7	8.04381	3.3297	7
	928	1.13857	0.574905	7	8.05048	3.20198	7
	932	1.13857	0.574905	7	8.05714	3.09765	7
	936	1.13857	0.574905	7	8.05714	3.09765	7
	940	1.13857	0.574905	7	8.05714	3.09765	7
	944	1.13857	0.574905	7	7.69333	2.92528	7
	948	1.13857	0.574905	7	6.95905	2.66702	7
	952	1.13857	0.574905	7	6.22476	2.41088	7
	956	1.13857	0.574905	7	5.49048	2.1576	7
	960	1.13857	0.574905	7	4.75619	1.90833	7
	964	1.13857	0.574905	7	4.02191	1.66485	7
	968	0.759048	0.38327	7	3.65143	1.62558	7
	972	0.741905	0.262095	7	4.01524	1.82251	7
	976	0.724762	0.406368	7	4.01524	1.82251	7
	980	0.724762	0.406368	7	4.01524	1.82251	7
	984	0.724762	0.406368	7	4.01524	1.82251	7
	988	0.724762	0.406368	7	4.01524	1.82251	7
	992	0.724762	0.406368	7	4.01524	1.82251	7
	996	0.724762	0.406368	7	4.01524	1.82251	7
	1000	0.724762	0.406368	7	4.38571	1.85538	7
	1004	0.724762	0.406368	7	5.12	2.09425	7
	1008	0.724762	0.406368	7	5.48381	2.28297	7
	1012	0.724762	0.406368	7	5.84762	2.47383	7
	1016	0.724762	0.406368	7	5.84762	2.47383	7
	1020	0.724762	0.406368	7	5.84762	2.47383	7
	1024	0.724762	0.406368	7	5.48381	2.28297	7
	1028	0.724762	0.406368	7	5.48381	2.28297	7
	1032	0.724762	0.406368	7	5.48381	2.28297	7
	1036	0.724762	0.406368	7	5.48381	2.28297	7
	1040	0.724762	0.406368	7	5.48381	2.28297	7
	1044	0.724762	0.406368	7	5.84762	2.47383	7
	1048	0.724762	0.406368	7	5.84095	2.6351	7
	1052	0.724762	0.406368	7	5.83429	2.81861	7
	1056	0.724762	0.406368	7	5.83429	2.81861	7
	1060	0.724762	0.406368	7	5.83429	2.81861	7
	1064	0.724762	0.406368	7	6.1981	3.01906	7
	1068	0.724762	0.406368	7	6.1981	3.01906	7
	1072	0.724762	0.406368	7	6.1981	3.01906	7
	1076	0.724762	0.406368	7	6.1981	3.01906	7
	1080	0.724762	0.406368	7	6.1981	3.01906	7
	1084	0.724762	0.406368	7	6.1981	3.01906	7
	1088	0.724762	0.406368	7	5.83429	2.81861	7
	1092	0.362381	0.203184	7	5.47048	2.61844	7
	1096	0	0	7	5.47048	2.61844	7
	1100	0	0	7	5.47048	2.61844	7
	1104	0	0	7	5.83429	2.81861	7
	1108	0	0	7	6.1981	3.01906	7
	1112	0	0	7	6.56191	3.21974	7
	1116	0	0	7	6.92571	3.42062	7
	1120	0	0	7	6.91905	3.62615	7
	1124	0	0	7	6.18476	3.43914	7
	1128	0	0	7	5.82095	3.23684	7
	1132	0	0	7	5.45714	3.03453	7
	1136	0	0	7	5.45714	3.03453	7
	1140	0	0	7	5.45714	3.03453	7
	1144	0	0	7	5.45714	3.03453	7
	1148	0	0	7	5.09333	2.83223	7
	1152	0	0	7	4.72952	2.62993	7
	1156	0	0	7	4.36571	2.42763	7
	1160	0	0	7	4.0019	2.22532	7
	1164	0	0	7	3.63809	2.02302	7
	1168	0	0	7	3.63809	2.02302	7
	1172	0	0	7	3.63809	2.02302	7
	1176	0	0	7	3.63809	2.02302	7
	1180	0	0	7	3.63809	2.02302	7
	1184	0	0	7	3.63809	2.02302	7
	1188	0	0	7	3.63809	2.02302	7
	1192	0	0	7	3.63809	2.02302	7
	1196	0	0	7	3.63809	2.02302	7
	1200	0	0	7	3.63809	2.02302	7
	1204	0	0	7	3.63809	2.02302	7
	1208	0	0	7	3.63809	2.02302	7
	1212	0	0	7	3.63809	2.02302	7
	1216	0	0	7	3.63809	2.02302	7
	1220	0	0	7	3.63809	2.02302	7
	1224	0	0	7	3.27429	1.82072	7
	1228	0	0	7	2.91048	1.61842	7
	1232	0	0	7	2.91048	1.61842	7
	1236	0	0	7	2.91048	1.61842	7
	1240	0	0	7	2.91048	1.61842	7
	1244	0	0	7	3.27429	1.82072	7
	1248	0	0	7	3.63809	2.02302	7
	1252	0	0	7	4.0019	2.22532	7
	1256	0	0	7	4.36571	2.42763	7
	1260	0	0	7	4.36571	2.42763	7
	1264	0	0	7	4.36571	2.42763	7
	1268	0	0	7	4.36571	2.42763	7
	1272	0	0	7	4.36571	2.42763	7
	1276	0	0	7	4.36571	2.42763	7
	1280	0	0	7	4.36571	2.42763	7
	1284	0	0	7	4.36571	2.42763	7
	1288	0	0	7	4.0019	2.22532	7
	1292	0	0	7	3.63809	2.02302	7
	1296	0	0	7	3.27429	1.82072	7
	1300	0	0	7	2.91048	1.61842	7
	1304	0	0	7	2.91048	1.61842	7
	1308	0	0	7	3.27429	1.82072	7
	1312	0	0	7	3.63809	2.02302	7
	1316	0	0	7	4.37238	2.20442	7
	1320	0	0	7	5.10667	2.40055	7
	1324	0	0	7	5.10667	2.40055	7
	1328	0	0	7	5.10667	2.40055	7
	1332	0	0	7	5.47048	2.60035	7
	1336	0	0	7	5.83429	2.80051	7
	1340	0	0	7	5.83429	2.80051	7
	1344	0	0	7	5.83429	2.80051	7
	1348	0	0	7	5.83429	2.80051	7
	1352	0	0	7	5.47048	2.60035	7
	1356	0	0	7	5.10667	2.40055	7
	1360	0	0	7	4.74286	2.2012	7
	1364	0	0	7	4.37905	2.00245	7
	1368	0	0	7	4.01524	1.80449	7
	1372	0	0	7	3.65143	1.6076	7
	1376	0	0	7	3.28762	1.41225	7
	1380	0	0	7	3.28762	1.41225	7
	1384	0	0	7	3.28762	1.41225	7
	1388	0	0	7	3.28762	1.41225	7
	1392	0	0	7	3.28762	1.41225	7
	1396	0	0	7	3.28762	1.41225	7
	1400	0	0	7	3.28762	1.41225	7
	1404	0	0	7	3.28762	1.41225	7
	1408	0	0	7	3.28762	1.41225	7
	1412	0	0	7	3.28762	1.41225	7
	1416	0	0	7	3.65143	1.6076	7
	1420	0	0	7	4.01524	1.80449	7
	1424	0	0	7	4.01524	1.80449	7
	1428	0	0	7	3.65143	1.6076	7
	1432	0	0	7	3.28762	1.41225	7
	1436	0	0	7	2.55333	1.20027	7
	1440	0	0	7	1.81905	1.01151	7
	1444	0	0	7	2.18286	1.21381	7
	1448	0	0	7	2.54667	1.41612	7
	1452	0	0	7	2.54667	1.41612	7
	1456	0	0	7	2.54667	1.41612	7
	1460	0	0	7	2.54667	1.41612	7
	1464	0	0	7	2.54667	1.41612	7
	1468	0	0	7	2.54667	1.41612	7
	1472	0	0	7	2.91048	1.61842	7
	1476	0	0	7	3.27429	1.82072	7
	1480	0	0	7	3.27429	1.82072	7
	1484	0.362381	0.203184	7	3.27429	1.82072	7
	1488	0.724762	0.406368	7	3.27429	1.82072	7
	1492	1.08714	0.609552	7	3.27429	1.82072	7
	1496	1.44952	0.812736	7	3.27429	1.82072	7
	1500	1.44952	0.812736	7	3.64476	1.80177	7
	1504	1.44952	0.812736	7	4.01524	1.80449	7
	1508	1.44952	0.812736	7	4.01524	1.80449	7
	1512	1.44952	0.812736	7	4.01524	1.80449	7
	1516	1.44952	0.812736	7	4.01524	1.80449	7
	1520	1.44952	0.812736	7	4.01524	1.80449	7
	1524	1.44952	0.812736	7	4.01524	1.80449	7
	1528	1.44952	0.812736	7	4.01524	1.80449	7
	1532	1.44952	0.812736	7	4.01524	1.80449	7
	1536	1.44952	0.812736	7	3.65143	1.6076	7
	1540	1.44952	0.812736	7	3.28762	1.41225	7
	1544	1.44952	0.812736	7	2.92381	1.21917	7
	1548	1.44952	0.812736	7	2.92381	1.21917	7
	1552	1.44952	0.812736	7	2.92381	1.21917	7
	1556	1.44952	0.812736	7	2.92381	1.21917	7
	1560	1.44952	0.812736	7	2.92381	1.21917	7
	1564	1.44952	0.812736	7	2.56	1.02964	7
	1568	1.44952	0.812736	7	2.19619	0.846041	7
	1572	1.44952	0.812736	7	1.83238	0.673249	7
	1576	1.44952	0.812736	7	1.46857	0.522107	7
	1580	1.44952	0.812736	7	1.46857	0.522107	7
	1584	1.44952	0.812736	7	1.46857	0.522107	7
	1588	1.44952	0.812736	7	1.46857	0.522107	7
	1592	1.44952	0.812736	7	1.46857	0.522107	7
	1596	1.44952	0.812736	7	1.46857	0.522107	7
	1600	1.44952	0.812736	7	1.83238	0.673249	7
	1604	1.08714	0.609552	7	1.83238	0.673249	7
	1608	0.724762	0.406368	7	1.83238	0.673249	7
	1612	0.362381	0.203184	7	1.83238	0.673249	7
	1616	0	0	7	1.83238	0.673249	7
	1620	0	0	7	1.46191	0.609587	7
	1624	0	0	7	1.09143	0.606907	7
	1628	0	0	7	1.09143	0.606907	7
	1632	0	0	7	1.09143	0.606907	7
	1636	0	0	7	1.09143	0.606907	7
	1640	0	0	7	1.09143	0.606907	7
	1644	0	0	7	1.09143	0.606907	7
	1648	0	0	7	1.09143	0.606907	7
	1652	0	0	7	1.09143	0.606907	7
	1656	0	0	7	1.45524	0.809209	7
	1660	0	0	7	1.81905	1.01151	7
	1664	0	0	7	2.18286	1.21381	7
	1668	0	0	7	2.18286	1.21381	7
	1672	0	0	7	2.18286	1.21381	7
	1676	0	0	7	2.18286	1.21381	7
	1680	0	0	7	2.18286	1.21381	7
	1684	0	0	7	2.18286	1.21381	7
	1688	0.379524	0.191635	7	2.18286	1.21381	7
	1692	0.759048	0.38327	7	2.18286	1.21381	7
	1696	0.759048	0.38327	7	2.18286	1.21381	7
	1700	0.759048	0.38327	7	2.18286	1.21381	7
	1704	0.759048	0.38327	7	2.18286	1.21381	7
	1708	0.759048	0.38327	7	2.18286	1.21381	7
	1712	0.759048	0.38327	7	1.81905	1.01151	7
	1716	0.759048	0.38327	7	1.45524	0.809209	7
	1720	0.759048	0.38327	7	1.09143	0.606907	7
	1724	0.759048	0.38327	7	1.45476	0.610494	7
	1728	0.759048	0.38327	7	1.8181	0.677614	7
	1732	0.759048	0.38327	7	1.8181	0.677614	7
	1736	0.759048	0.38327	7	1.8181	0.677614	7
	1740	0.759048	0.38327	7	1.8181	0.677614	7
	1744	0.759048	0.38327	7	1.8181	0.677614	7
	1748	0.759048	0.38327	7	1.8181	0.677614	7
	1752	0.759048	0.38327	7	1.8181	0.677614	7
	1756	0.759048	0.38327	7	2.55381	0.782161	7
	1760	0.759048	0.38327	7	3.28952	0.949939	7
	1764	0.759048	0.38327	7	3.65286	1.10165	7
	1768	0.759048	0.38327	7	4.01619	1.26766	7
	1772	0.759048	0.38327	7	4.74333	1.50611	7
	1776	0.759048	0.38327	7	5.10667	1.6774	7
	1780	0.759048	0.38327	7	4.74286	1.62478	7
	1784	0.759048	0.38327	7	4.37905	1.59626	7
	1788	0.759048	0.38327	7	4.37905	1.59626	7
	1792	0.759048	0.38327	7	4.37905	1.59626	7
	1796	0.759048	0.38327	7	4.37905	1.59626	7
	1800	0.759048	0.38327	7	4.37905	1.59626	7
	1804	0.759048	0.38327	7	4.37905	1.59626	7
	1808	0.379524	0.191635	7	4.37905	1.59626	7
	1812	0	0	7	4.37905	1.59626	7
	1816	0	0	7	4.37905	1.59626	7
	1820	0	0	7	4.37905	1.59626	7
	1824	0	0	7	4.37905	1.59626	7
	1828	0	0	7	4.37905	1.59626	7
	1832	0	0	7	4.37905	1.59626	7
	1836	0	0	7	4.37905	1.59626	7
	1840	0	0	7	4.37905	1.59626	7
	1844	0	0	7	4.01571	1.40651	7
	1848	0	0	7	3.65238	1.22091	7
	1852	0	0	7	3.65238	1.22091	7
	1856	0	0	7	3.65238	1.22091	7
	1860	0	0	7	3.65238	1.22091	7
	1864	0	0	7	3.65238	1.22091	7
	1868	0	0	7	3.65238	1.22091	7
	1872	0	0	7	3.65238	1.22091	7
	1876	0	0	7	2.91667	1.01864	7
	1880	0	0	7	2.18095	0.850075	7
	1884	0	0	7	1.81762	0.678056	7
	1888	0	0	7	1.45429	0.528188	7
	1892	0	0	7	0.727143	0.264094	7
	1896	0	0	7	0	0	7
	1900	0	0	7	0	0	7
	1904	0	0	7	0	0	7
	1908	0	0	7	0	0	7
	1912	0	0	7	0	0	7
	1916	0	0	7	0	0	7
	1920	0	0	7	0	0	7
	1924	0	0	7	0	0	7
	1928	0	0	7	0.36381	0.202302	7
	1932	0	0	7	0.727619	0.404604	7
	1936	0	0	7	1.09143	0.606907	7
	1940	0	0	7	1.45524	0.809209	7
	1944	0	0	7	1.45524	0.809209	7
	1948	0	0	7	1.45524	0.809209	7
	1952	0	0	7	1.45524	0.809209	7
	1956	0	0	7	1.45524	0.809209	7
	1960	0	0	7	1.45524	0.809209	7
	1964	0	0	7	1.45524	0.809209	7
	1968	0	0	7	1.45524	0.809209	7
	1972	0	0	7	1.45524	0.809209	7
	1976	0	0	7	1.45524	0.809209	7
	1980	0	0	7	1.45524	0.809209	7
	1984	0	0	7	1.45524	0.809209	7
	1988	0	0	7	1.45524	0.809209	7
	1992	0	0	7	1.81857	0.804338	7
	1996	0	0	7	2.55571	0.832907	7
	2000	0	0	7	3.29286	0.937218	7
	2004	0	0	7	4.03	1.09585	7
	2008	0	0	7	4.76714	1.2889	7
	2012	0	0	7	6.23048	1.5424	7
	2016	0	0	7	7.69381	1.81433	7
	2020	0	0	7	8.43095	2.01918	7
	2024	0	0	7	9.16809	2.23612	7
	2028	0	0	7	9.90524	2.46196	7
	2032	0	0	7	10.6424	2.69447	7
	2036	0	0	7	11.3795	2.93205	7
	2040	0.379524	0.191635	7	12.1167	3.17356	7
	2044	0.759048	0.38327	7	12.8538	3.41819	7
	2048	0.759048	0.38327	7	13.2271	3.65285	7
	2052	0.759048	0.38327	7	13.6005	3.9076	7
	2056	0.759048	0.38327	7	13.6105	4.0411	7
	2060	0.759048	0.38327	7	13.6205	4.19196	7
	2064	0.759048	0.38327	7	13.9943	4.32458	7
	2068	0.759048	0.38327	7	14.3681	4.46185	7
	2072	0.759048	0.38327	7	14.7419	4.60335	7
	2076	0.759048	0.38327	7	15.1157	4.74871	7
	2080	0.759048	0.38327	7	15.4895	4.89757	7
	2084	0.759048	0.38327	7	15.8633	5.04963	7
	2088	0.759048	0.38327	7	16.2371	5.20461	7
	2092	0.759048	0.38327	7	16.6109	5.36225	7
	2096	0.759048	0.38327	7	17.3367	5.43579	7
	2100	0.759048	0.38327	7	18.0624	5.52148	7
	2104	0.759048	0.38327	7	18.4257	5.62861	7
	2108	0.759048	0.38327	7	18.789	5.74088	7
	2112	0.759048	0.38327	7	18.789	5.74088	7
	2116	0.759048	0.38327	7	18.7876	5.56031	7
	2120	0.759048	0.38327	7	18.7862	5.38958	7
	2124	0.759048	0.38327	7	18.7848	5.22964	7
	2128	0.759048	0.38327	7	18.7833	5.08153	7
	2132	0.759048	0.38327	7	18.0557	5.00772	7
	2136	0.759048	0.38327	7	17.6905	4.93736	7
	2140	0.759048	0.38327	7	18.0514	4.81409	7
	2144	0.759048	0.38327	7	18.7762	4.66129	7
	2148	0.759048	0.38327	7	19.1376	4.39905	7
	2152	0.759048	0.38327	7	19.1352	4.21326	7
	2156	0.759048	0.38327	7	18.7705	4.04295	7
	2160	0.379524	0.191635	7	18.4057	3.89784	7
	2164	0	0	7	18.0409	3.78085	7
	2168	0	0	7	17.6762	3.69463	7
	2172	0	0	7	17.3114	3.64138	7
	2176	0	0	7	17.6724	3.74109	7
	2180	0	0	7	18.0333	3.87126	7
	2184	0	0	7	18.0319	3.98254	7
	2188	0	0	7	18.0305	4.11165	7
	2192	0	0	7	17.6567	4.11152	7
	2196	0	0	7	17.6452	4.1683	7
	2200	0	0	7	17.9976	4.21835	7
	2204	0	0	7	18.35	4.29898	7
	2208	0	0	7	18.3386	4.4158	7
	2212	0	0	7	18.3271	4.54958	7
	2216	0	0	7	17.9638	4.47919	7
	2220	0	0	7	17.6005	4.41697	7
	2224	0	0	7	17.5995	4.46105	7
	2228	0	0	7	17.9709	4.65739	7
	2232	0	0	7	17.98	4.76628	7
	2236	0	0	7	17.6167	4.74694	7
	2240	0	0	7	17.2533	4.7362	7
	2244	0	0	7	16.89	4.73411	7
	2248	0	0	7	16.5267	4.74068	7
	2252	0	0	7	16.5267	4.74068	7
	2256	0	0	7	16.1643	4.63582	7
	2260	0	0	7	15.8019	4.53765	7
	2264	0	0	7	15.0757	4.45105	7
	2268	0	0	7	14.7129	4.37958	7
	2272	0	0	7	14.7138	4.31421	7
	2276	0	0	7	15.0771	4.3345	7
	2280	0	0	7	15.4405	4.36411	7
	2284	0	0	7	15.8038	4.40285	7
	2288	0	0	7	16.1671	4.45048	7
	2292	0	0	7	16.5305	4.50673	7
	2296	0	0	7	16.5314	4.51511	7
	2300	0	0	7	16.5324	4.5438	7
	2304	0	0	7	16.8957	4.62773	7
	2308	0	0	7	17.259	4.71887	7
	2312	0	0	7	17.9948	4.95826	7
	2316	0	0	7	18.3681	5.17338	7
	2320	0	0	7	18.3776	5.43562	7
	2324	0	0	7	18.3871	5.71769	7
	2328	0	0	7	18.7605	5.97293	7
	2332	0	0	7	18.7705	6.12924	7
	2336	0	0	7	18.7805	6.29604	7
	2340	0	0	7	18.7905	6.47253	7
	2344	0	0	7	18.8005	6.65794	7
	2348	0	0	7	18.4381	6.69313	7
	2352	0	0	7	18.4381	6.69313	7
	2356	0	0	7	18.4381	6.69313	7
	2360	0	0	7	18.4381	6.69313	7
	2364	0	0	7	18.4381	6.69313	7
	2368	0	0	7	18.0657	6.53681	7
	2372	0	0	7	18.0557	6.34746	7
	2376	0	0	7	18.0457	6.16697	7
	2380	0	0	7	17.6733	6.01801	7
	2384	0	0	7	17.301	5.87187	7
	2388	0	0	7	17.3024	5.69393	7
	2392	0	0	7	17.3038	5.52575	7
	2396	0.362381	0.203184	7	17.3052	5.36825	7
	2400	0.724762	0.406368	7	17.3067	5.2224	7
	2404	0.724762	0.406368	7	17.3081	5.0892	7
	2408	0.724762	0.406368	7	17.3095	4.96967	7
	2412	0.724762	0.406368	7	17.3109	4.86481	7
	2416	0.724762	0.406368	7	17.3124	4.7756	7
	2420	0.724762	0.406368	7	16.9505	4.56091	7
	2424	0.724762	0.406368	7	16.5886	4.36465	7
	2428	0.724762	0.406368	7	16.2267	4.18938	7
	2432	1.10429	0.428054	7	16.2419	3.99145	7
	2436	1.48381	0.524189	7	16.2571	3.82725	7
	2440	1.48381	0.524189	7	15.8952	3.73021	7
	2444	1.48381	0.524189	7	15.5333	3.66521	7
	2448	1.48381	0.524189	7	15.1714	3.63395	7
	2452	1.48381	0.524189	7	15.1729	3.72488	7
	2456	1.48381	0.524189	7	15.1743	3.83601	7
	2460	1.48381	0.524189	7	15.1757	3.96565	7
	2464	1.48381	0.524189	7	15.1771	4.11204	7
	2468	1.48381	0.524189	7	15.1786	4.27347	7
	2472	1.48381	0.524189	7	15.9057	4.50573	7
	2476	1.48381	0.524189	7	16.6329	4.75985	7
	2480	1.48381	0.524189	7	17.36	5.03254	7
	2484	1.48381	0.524189	7	18.0871	5.32094	7
	2488	1.48381	0.524189	7	18.8243	5.56919	7
	2492	1.48381	0.524189	7	18.8357	5.72776	7
	2496	1.86333	0.663149	7	18.8471	5.89744	7
	2500	2.24286	0.823533	7	19.2209	6.05945	7
	2504	2.24286	0.823533	7	19.9586	6.17771	7
	2508	2.24286	0.823533	7	20.6948	6.0996	7
	2512	2.24286	0.823533	7	21.0671	6.06696	7
	2516	1.88048	0.769163	7	21.4395	6.04055	7
	2520	1.51809	0.766541	7	21.8119	6.02046	7
	2524	1.51809	0.766541	7	22.1843	6.00675	7
	2528	1.51809	0.766541	7	22.1829	5.83556	7
	2532	1.88286	0.764053	7	22.1814	5.67429	7
	2536	2.24762	0.813229	7	22.5595	5.48196	7
	2540	2.24762	0.813229	7	23.301	5.3961	7
	2544	2.24762	0.813229	7	24.0424	5.33745	7
	2548	2.24762	0.813229	7	24.0319	5.30441	7
	2552	1.8681	0.653085	7	23.6443	5.33772	7
	2556	1.48857	0.514923	7	23.2567	5.39365	7
	2560	1.48857	0.514923	7	23.6186	5.43868	7
	2564	1.48857	0.514923	7	23.9805	5.50633	7
	2568	1.48857	0.514923	7	24.3424	5.59577	7
	2572	1.48857	0.514923	7	24.3319	5.65892	7
	2576	1.48857	0.514923	7	24.3214	5.73703	7
	2580	1.48857	0.514923	7	24.3109	5.82951	7
	2584	1.48857	0.514923	7	24.6729	5.98004	7
	2588	1.48857	0.514923	7	25.0348	6.14746	7
	2592	1.48857	0.514923	7	24.671	6.19212	7
	2596	1.48857	0.514923	7	24.3071	6.25667	7
	2600	1.48857	0.514923	7	23.9433	6.34051	7
	2604	1.48857	0.514923	7	23.5795	6.44289	7
	2608	1.48857	0.514923	7	23.5781	6.50969	7
	2612	1.48857	0.514923	7	23.5767	6.58882	7
	2616	1.10905	0.420975	7	23.5752	6.67983	7
	2620	0.729524	0.403413	7	23.5738	6.78224	7
	2624	0.729524	0.403413	7	23.5824	6.92285	7
	2628	0.729524	0.403413	7	23.5891	6.91676	7
	2632	0.729524	0.403413	7	23.5857	6.88256	7
	2636	0.729524	0.403413	7	23.5824	6.8606	7
	2640	0.729524	0.403413	7	23.579	6.851	7
	2644	0.729524	0.403413	7	23.5757	6.85382	7
	2648	0.729524	0.403413	7	23.9462	6.83483	7
	2652	0.364762	0.201707	7	24.6962	6.79854	7
	2656	0.374762	0.195063	7	25.0667	6.79018	7
	2660	0.749524	0.390126	7	25.0576	6.81215	7
	2664	1.12429	0.585189	7	25.0486	6.84669	7
	2668	1.49905	0.780252	7	25.7914	6.95677	7
	2672	1.87857	0.784876	7	26.5343	7.07401	7
	2676	2.25809	0.834694	7	27.2771	7.19806	7
	2680	2.25809	0.834694	7	27.6476	7.2211	7
	2684	2.25809	0.834694	7	27.6476	7.2211	7
	2688	2.25809	0.834694	7	27.6476	7.2211	7
	2692	2.25809	0.834694	7	28.02	7.32857	7
	2696	2.25809	0.834694	7	28.3924	7.43968	7
	2700	2.25809	0.834694	7	28.7648	7.55429	7
	2704	2.25809	0.834694	7	28.7648	7.55429	7
	2708	2.25809	0.834694	7	28.7648	7.55429	7
	2712	2.25809	0.834694	7	28.7648	7.55429	7
	2716	2.25809	0.834694	7	28.7648	7.55429	7
	2720	2.25809	0.834694	7	28.7648	7.55429	7
	2724	2.63762	0.922413	7	28.7648	7.55429	7
	2728	3.01714	1.03847	7	28.7648	7.55429	7
	2732	3.01714	1.03847	7	28.7648	7.55429	7
	2736	3.01714	1.03847	7	28.7648	7.55429	7
	2740	3.01714	1.03847	7	28.7648	7.55429	7
	2744	3.01714	1.03847	7	28.7705	7.55973	7
	2748	3.01714	1.03847	7	28.4057	7.55738	7
	2752	3.01714	1.03847	7	28.4148	7.52288	7
	2756	3.01714	1.03847	7	28.0443	7.51532	7
	2760	3.01714	1.03847	7	27.6738	7.51296	7
	2764	3.01714	1.03847	7	27.3033	7.51583	7
	2768	3.01714	1.03847	7	26.9329	7.5239	7
	2772	3.01714	1.03847	7	26.1829	7.55475	7
	2776	2.64238	0.91737	7	25.4329	7.5941	7
	2780	2.26762	0.82511	7	25.0624	7.61617	7
	2784	1.89286	0.772105	7	24.6919	7.64331	7
	2788	1.51809	0.766541	7	24.3214	7.67546	7
	2792	1.13857	0.574905	7	24.3248	7.67576	7
	2796	0.759048	0.38327	7	24.3281	7.68713	7
	2800	0.759048	0.38327	7	24.3314	7.70954	7
	2804	0.759048	0.38327	7	24.7052	7.68866	7
	2808	0.759048	0.38327	7	24.7052	7.68866	7
	2812	0.759048	0.38327	7	24.7052	7.68866	7
	2816	0.759048	0.38327	7	25.0676	7.64664	7
	2820	1.13857	0.574905	7	25.43	7.60982	7
	2824	1.51809	0.766541	7	25.7924	7.57826	7
	2828	1.89762	0.958176	7	26.1548	7.55204	7
	2832	1.89762	0.958176	7	26.5171	7.53121	7
	2836	1.89762	0.958176	7	26.8795	7.51582	7
	2840	1.89762	0.958176	7	27.6157	7.4844	7
	2844	1.51809	0.766541	7	28.3519	7.46204	7
	2848	1.13857	0.574905	7	28.7143	7.46164	7
	2852	1.13857	0.574905	7	29.0767	7.46677	7
	2856	1.13857	0.574905	7	29.4391	7.47742	7
	2860	1.13857	0.574905	7	29.8014	7.49356	7
	2864	1.13857	0.574905	7	29.0495	7.40877	7
	2868	1.13857	0.574905	7	28.2976	7.3324	7
	2872	1.13857	0.574905	7	27.5457	7.26472	7
	2876	1.13857	0.574905	7	27.1733	7.15716	7
	2880	1.13857	0.574905	7	26.801	7.05344	7
	2884	1.13857	0.574905	7	26.801	7.05344	7
	2888	1.13857	0.574905	7	27.1748	7.04197	7
	2892	1.51809	0.766541	7	27.5486	7.03594	7
	2896	1.89762	0.958176	7	27.5486	7.03594	7
	2900	1.89762	0.958176	7	27.5486	7.03594	7
	2904	1.89762	0.958176	7	27.5486	7.03594	7
	2908	1.89762	0.958176	7	27.5486	7.03594	7
	2912	1.89762	0.958176	7	27.1748	7.04197	7
	2916	1.89762	0.958176	7	26.801	7.05344	7
	2920	1.89762	0.958176	7	26.4271	7.07031	7
	2924	1.89762	0.958176	7	26.0514	6.93712	7
	2928	1.89762	0.958176	7	26.42	6.74068	7
	2932	1.89762	0.958176	7	27.1524	6.5054	7
	2936	1.89762	0.958176	7	27.5224	6.2635	7
	2940	1.51809	0.766541	7	27.8924	6.04889	7
	2944	1.13857	0.574905	7	28.2624	5.86456	7
	2948	0.759048	0.38327	7	27.8981	5.76877	7
	2952	0.759048	0.38327	7	27.5338	5.69429	7
	2956	0.759048	0.38327	7	27.1695	5.64195	7
	2960	0.759048	0.38327	7	26.4314	5.64748	7
	2964	0.759048	0.38327	7	26.0571	5.65145	7
	2968	1.13667	0.405169	7	26.0567	5.64479	7
	2972	1.51429	0.505913	7	26.0648	5.71389	7
	2976	1.8919	0.64981	7	26.0729	5.79804	7
	2980	2.26952	0.814295	7	26.081	5.89658	7
	2984	2.64714	0.989151	7	27.1862	5.91798	7
	2988	2.64714	0.989151	7	28.2914	5.95395	7
	2992	2.64714	0.989151	7	29.0343	6.05341	7
	2996	2.64714	0.989151	7	29.7771	6.16225	7
	3000	2.64714	0.989151	7	30.1495	6.21679	7
	3004	2.64714	0.989151	7	30.1495	6.21679	7
	3008	2.64714	0.989151	7	30.5324	6.15807	7
	3012	2.26762	0.958244	7	30.9152	6.11869	7
	3016	1.8881	0.965139	7	30.9152	6.11869	7
	3020	1.8881	0.965139	7	30.9152	6.11869	7
	3024	1.8881	0.965139	7	31.2948	6.07035	7
	3028	1.8881	0.965139	7	31.6743	6.02771	7
	3032	1.8881	0.965139	7	32.0538	5.99091	7
	3036	1.8881	0.965139	7	32.4333	5.96004	7
	3040	1.8881	0.965139	7	32.8129	5.93521	7
	3044	1.8881	0.965139	7	33.1943	6.01556	7
	3048	1.8881	0.965139	7	33.2052	6.06523	7
	3052	1.8881	0.965139	7	32.4729	6.18132	7
	3056	1.8881	0.965139	7	31.7405	6.32076	7
	3060	1.8881	0.965139	7	31.0081	6.48205	7
	3064	1.8881	0.965139	7	30.2757	6.6636	7
	3068	1.8881	0.965139	7	30.6571	6.74515	7
	3072	1.8881	0.965139	7	31.0386	6.84445	7
	3076	1.8881	0.965139	7	31.0405	6.94725	7
	3080	1.8881	0.965139	7	31.0424	7.06104	7
	3084	1.8881	0.965139	7	30.6805	7.23348	7
	3088	1.51048	0.772111	7	30.6957	7.38567	7
	3092	1.13286	0.579083	7	30.7024	7.37513	7
	3096	0.755238	0.386055	7	29.9686	7.27015	7
	3100	0.377619	0.193028	7	29.2348	7.17339	7
	3104	0	0	7	28.5019	7.2515	7
	3108	0	0	7	27.7691	7.33821	7
	3112	0	0	7	27.7724	7.33583	7
	3116	0	0	7	27.7757	7.34518	7
	3120	0	0	7	28.1495	7.31238	7
	3124	0	0	7	28.5233	7.2847	7
	3128	0	0	7	28.1405	7.27508	7
	3132	0	0	7	27.3943	7.16048	7
	3136	0	0	7	27.0324	6.90023	7
	3140	0	0	7	27.0409	6.59822	7
	3144	0	0	7	26.67	6.30294	7
	3148	0	0	7	25.9286	6.06742	7
	3152	0	0	7	25.5595	5.98094	7
	3156	0	0	7	25.1905	5.9139	7
	3160	0	0	7	24.8214	5.86695	7
	3164	0	0	7	24.4524	5.84059	7
	3168	0	0	7	24.0833	5.83508	7
	3172	0	0	7	24.0938	5.81709	7
	3176	0	0	7	24.1043	5.8145	7
	3180	0	0	7	24.1148	5.82733	7
	3184	0	0	7	24.1252	5.85549	7
	3188	0	0	7	23.7562	5.93025	7
	3192	0.379524	0.191635	7	23.3871	6.02441	7
	3196	0.759048	0.38327	7	23.3976	6.09529	7
	3200	0.759048	0.38327	7	23.4081	6.1799	7
	3204	0.759048	0.38327	7	23.4186	6.27768	7
	3208	0.759048	0.38327	7	23.4152	6.43702	7
	3212	0.759048	0.38327	7	23.7743	6.558	7
	3216	0.759048	0.38327	7	24.8738	6.65682	7
	3220	0.759048	0.38327	7	25.9733	6.7674	7
	3224	0.759048	0.38327	7	26.7095	6.86719	7
	3228	0.759048	0.38327	7	27.4371	6.8149	7
	3232	0.759048	0.38327	7	27.7909	6.64267	7
	3236	0.759048	0.38327	7	27.781	6.52639	7
	3240	0.759048	0.38327	7	27.7709	6.4221	7
	3244	0.759048	0.38327	7	27.761	6.3304	7
	3248	1.13667	0.405169	7	27.7509	6.25183	7
	3252	1.51429	0.505913	7	28.1043	6.20903	7
	3256	1.8919	0.64981	7	29.2024	6.33316	7
	3260	2.26952	0.814295	7	29.93	6.52014	7
	3264	2.26952	0.814295	7	30.6576	6.72588	7
	3268	2.26952	0.814295	7	31.3819	6.75942	7
	3272	2.26952	0.814295	7	31.7338	6.72646	7
	3276	2.26952	0.814295	7	32.0857	6.71308	7
	3280	2.26952	0.814295	7	32.4376	6.71938	7
	3284	2.26952	0.814295	7	32.7895	6.74533	7
	3288	2.26952	0.814295	7	33.1414	6.79068	7
	3292	2.26952	0.814295	7	33.1309	6.78453	7
	3296	2.26952	0.814295	7	33.5	6.73684	7
	3300	2.26952	0.814295	7	33.8691	6.70705	7
	3304	2.26952	0.814295	7	34.2381	6.69541	7
	3308	2.26952	0.814295	7	34.9809	6.75814	7
	3312	1.89	0.769995	7	36.4648	6.68564	7
	3316	1.51048	0.772111	7	37.9486	6.62683	7
	3320	1.51048	0.772111	7	39.0586	6.53205	7
	3324	1.51048	0.772111	7	40.5324	6.39406	7
	3328	1.51048	0.772111	7	41.2724	6.20991	7
	3332	1.51048	0.772111	7	40.8981	5.94076	7
	3336	1.51048	0.772111	7	40.5238	5.69786	7
	3340	1.51048	0.772111	7	40.8938	5.43697	7
	3344	1.51048	0.772111	7	41.6262	5.24095	7
	3348	1.51048	0.772111	7	42.3762	5.18261	7
	3352	1.51048	0.772111	7	43.1262	5.13637	7
	3356	1.51048	0.772111	7	44.2376	4.97088	7
	3360	1.51048	0.772111	7	45.349	4.81831	7
	3364	1.88762	0.773915	7	46.0967	4.7115	7
	3368	1.88714	0.658029	7	46.8443	4.61733	7
	3372	1.50952	0.513815	7	47.5919	4.53659	7
	3376	1.1319	0.411738	7	47.59	4.51868	7
	3380	0.754286	0.386743	7	47.5881	4.52133	7
	3384	0.754286	0.386743	7	47.9586	4.55673	7
	3388	0.754286	0.386743	7	48.7029	4.61014	7
	3392	0.754286	0.386743	7	49.0848	4.66199	7
	3396	0.754286	0.386743	7	49.4667	4.74145	7
	3400	0.754286	0.386743	7	49.8486	4.84715	7
	3404	0.754286	0.386743	7	50.2305	4.97743	7
	3408	0.754286	0.386743	7	50.6124	5.13041	7
	3412	0.754286	0.386743	7	51.7338	5.1901	7
	3416	0.754286	0.386743	7	52.4757	5.30788	7
	3420	0.754286	0.386743	7	52.8405	5.51411	7
	3424	0.754286	0.386743	7	53.2052	5.73452	7
	3428	1.1319	0.411738	7	53.1962	5.89701	7
	3432	1.50952	0.513815	7	52.4462	6.0392	7
	3436	1.50952	0.513815	7	51.6962	6.18885	7
	3440	1.50952	0.513815	7	51.32	6.41458	7
	3444	1.50952	0.513815	7	50.2095	6.59448	7
	3448	1.50952	0.513815	7	49.4695	6.70786	7
	3452	1.50952	0.513815	7	49.4814	6.77	7
	3456	1.50952	0.513815	7	49.8638	6.93148	7
	3460	1.50952	0.513815	7	49.1386	6.99819	7
	3464	1.50952	0.513815	7	48.051	7.10672	7
	3468	1.50952	0.513815	7	47.3167	7.19508	7
	3472	1.50952	0.513815	7	46.5824	7.30298	7
	3476	1.50952	0.513815	7	45.8505	7.39257	7
	3480	1.50952	0.513815	7	45.1186	7.50129	7
	3484	1.13238	0.411254	7	44.7505	7.54717	7
	3488	0.755238	0.386055	7	44.02	7.62838	7
	3492	0.755238	0.386055	7	43.2895	7.72957	7
	3496	0.755238	0.386055	7	42.9362	7.79048	7
	3500	0.755238	0.386055	7	42.5829	7.86777	7
	3504	0.755238	0.386055	7	41.8571	7.8712	7
	3508	0.755238	0.386055	7	41.1314	7.88383	7
	3512	0.755238	0.386055	7	40.7681	7.85835	7
	3516	0.755238	0.386055	7	40.3981	7.69778	7
	3520	0.755238	0.386055	7	40.0281	7.55135	7
	3524	0.755238	0.386055	7	39.6581	7.41989	7
	3528	0.755238	0.386055	7	39.2881	7.3042	7
	3532	0.755238	0.386055	7	38.541	7.26494	7
	3536	0.755238	0.386055	7	38.5343	7.17654	7
	3540	0.755238	0.386055	7	38.541	7.0659	7
	3544	0.755238	0.386055	7	38.1705	7.02155	7
	3548	0.377619	0.193028	7	38.1705	7.02155	7
	3552	0	0	7	37.8071	7.02794	7
	3556	0	0	7	37.4438	7.04017	7
	3560	0	0	7	37.4429	7.01896	7
	3564	0	0	7	37.8124	7.05638	7
	3568	0	0	7	37.8195	7.13918	7
	3572	0	0	7	38.19	7.19545	7
	3576	0	0	7	38.19	7.19545	7
	3580	0	0	7	38.5533	7.163	7
	3584	0	0	7	38.5533	7.163	7
	3588	0	0	7	38.191	7.1973	7
	3592	0	0	7	37.8286	7.23715	7
	3596	0	0	7	37.83	7.25763	7
	3600	0	0	7	37.8314	7.29062	7
	3604	0.377619	0.193028	7	37.4691	7.3481	7
	3608	0.755238	0.386055	7	37.8395	7.28401	7
	3612	0.755238	0.386055	7	38.2009	7.09429	7
	3616	0.755238	0.386055	7	38.5624	6.91811	7
	3620	0.755238	0.386055	7	39.3033	6.69515	7
	3624	0.755238	0.386055	7	40.4167	6.5784	7
	3628	0.755238	0.386055	7	41.53	6.47287	7
	3632	0.755238	0.386055	7	42.6433	6.37912	7
	3636	0.755238	0.386055	7	43.7633	6.39494	7
	3640	0.755238	0.386055	7	44.8833	6.43842	7
	3644	0.755238	0.386055	7	46.0033	6.50901	7
	3648	0.755238	0.386055	7	47.1233	6.60584	7
	3652	0.755238	0.386055	7	48.9829	6.56618	7
	3656	0.755238	0.386055	7	49.7386	6.58499	7
	3660	0.755238	0.386055	7	50.8581	6.54931	7
	3664	0.755238	0.386055	7	51.9776	6.54027	7
	3668	0.755238	0.386055	7	52.7267	6.4644	7
	3672	0.755238	0.386055	7	54.2029	6.30036	7
	3676	0.755238	0.386055	7	55.3052	6.04763	7
	3680	0.755238	0.386055	7	56.0452	5.8764	7
	3684	0.755238	0.386055	7	56.7795	5.81315	7
	3688	0.755238	0.386055	7	57.8762	5.69336	7
	3692	0.755238	0.386055	7	58.6105	5.6504	7
	3696	0.755238	0.386055	7	58.9809	5.68874	7
	3700	0.755238	0.386055	7	59.3514	5.73366	7
	3704	0.755238	0.386055	7	60.0852	5.75685	7
	3708	0.755238	0.386055	7	61.1829	5.71853	7
	3712	0.755238	0.386055	7	62.2876	5.6321	7
	3716	0.755238	0.386055	7	62.6648	5.71168	7
	3720	0.755238	0.386055	7	62.6624	5.82674	7
	3724	0.377619	0.193028	7	63.3962	5.91092	7
	3728	0	0	7	63.7595	5.92161	7
	3732	0	0	7	63.7595	5.92161	7
	3736	0	0	7	63.7595	5.92161	7
	3740	0	0	7	63.0167	5.91783	7
	3744	0	0	7	62.6409	5.72373	7
	3748	0	0	7	62.2652	5.56174	7
	3752	0	0	7	61.8895	5.43473	7
	3756	0	0	7	61.8862	5.35137	7
	3760	0	0	7	61.8829	5.29989	7
	3764	0	0	7	61.8795	5.28123	7
	3768	0	0	7	61.8762	5.29575	7
	3772	0	0	7	61.1333	5.41202	7
	3776	0	0	7	60.7538	5.48372	7
	3780	0	0	7	60.3743	5.56109	7
	3784	0	0	7	60.7352	5.54818	7
	3788	0	0	7	60.3486	5.51189	7
	3792	0	0	7	59.5981	5.58531	7
	3796	0	0	7	59.2214	5.77049	7
	3800	0	0	7	58.8429	6.04413	7
	3804	0	0	7	58.47	6.14422	7
	3808	0	0	7	58.4609	6.15936	7
	3812	0	0	7	58.4509	6.16789	7
	3816	0	0	7	58.441	6.19102	7
	3820	0	0	7	58.431	6.22862	7
	3824	0	0	7	58.0576	6.27011	7
	3828	0	0	7	57.6843	6.33199	7
	3832	0.371429	0.197359	7	57.3038	6.4715	7
	3836	0.742857	0.394718	7	57.2871	6.53745	7
	3840	0.742857	0.394718	7	57.65	6.5179	7
	3844	0.742857	0.394718	7	57.6405	6.56316	7
	3848	0.742857	0.394718	7	57.2671	6.70427	7
	3852	0.742857	0.394718	7	57.2662	6.80816	7
	3856	0.742857	0.394718	7	57.2652	6.92382	7
	3860	1.12048	0.415448	7	57.6276	7.00223	7
	3864	1.49809	0.513723	7	57.2505	7.03908	7
	3868	1.87571	0.655549	7	56.8733	7.08101	7
	3872	2.25333	0.818595	7	56.4962	7.12795	7
	3876	2.63095	0.992457	7	55.7467	7.22881	7
	3880	3.00857	1.17233	7	54.9971	7.33753	7
	3884	3.38619	1.35583	7	54.2476	7.45375	7
	3888	3.76381	1.54166	7	53.8705	7.51661	7
	3892	4.14143	1.72906	7	53.8567	7.55086	7
	3896	4.51905	1.91758	7	53.8476	7.58449	7
	3900	4.89667	2.10692	7	53.8386	7.62984	7
	3904	5.27429	2.29687	7	53.4662	7.70109	7
	3908	5.65191	2.4873	7	53.8414	7.77517	7
	3912	6.02952	2.6781	7	53.8395	7.92413	7
	3916	6.40714	2.86919	7	53.8376	8.08124	7
	3920	7.14667	3.04273	7	53.8443	7.95079	7
	3924	7.88619	3.22885	7	53.8509	7.82883	7
	3928	8.26381	3.41951	7	53.4962	7.73848	7
	3932	8.64143	3.61042	7	53.5119	7.72277	7
	3936	9.01905	3.80154	7	53.8914	7.64683	7
	3940	9.39667	3.99285	7	54.2709	7.57498	7
	3944	9.77429	4.18432	7	55.0138	7.49105	7
	3948	10.1519	4.37592	7	55.3929	7.49211	7
	3952	10.1581	4.58407	7	55.7719	7.51031	7
	3956	10.1643	4.80121	7	55.7886	7.47073	7
	3960	10.5419	4.99358	7	55.8052	7.45526	7
	3964	10.9195	5.18599	7	56.1857	7.36088	7
	3968	11.2971	5.37845	7	56.9219	7.15942	7
	3972	11.6748	5.57095	7	57.6581	6.97429	7
	3976	12.0524	5.76349	7	58.3943	6.80682	7
	3980	12.0524	5.76349	7	58.76	6.60006	7
	3984	12.0524	5.76349	7	59.4962	6.47703	7
	3988	12.0524	5.76349	7	60.2324	6.37642	7
	3992	12.0524	5.76349	7	60.5891	6.31477	7
	3996	12.0524	5.76349	7	60.9457	6.27346	7
	4000	12.0524	5.76349	7	61.3024	6.25289	7
	4004	12.0524	5.76349	7	61.6591	6.25328	7
	4008	12.0524	5.76349	7	61.6433	6.39902	7
	4012	12.0524	5.76349	7	61.2643	6.48332	7
	4016	12.0524	5.76349	7	61.2576	6.45363	7
	4020	12.0524	5.76349	7	61.251	6.43813	7
	4024	12.0524	5.76349	7	61.2443	6.43692	7
	4028	12.0524	5.76349	7	61.2376	6.45001	7
	4032	12.0524	5.76349	7	61.9805	6.26636	7
	4036	12.0524	5.76349	7	62.7233	6.1029	7
	4040	11.6905	5.77359	7	63.0871	6.10513	7
	4044	11.3286	5.79083	7	63.4509	6.11405	7
	4048	11.3286	5.79083	7	64.1829	6.02876	7
	4052	11.3286	5.79083	7	64.1671	6.08698	7
	4056	11.3286	5.79083	7	63.7809	6.21005	7
	4060	11.3286	5.79083	7	63.3948	6.35089	7
	4064	11.3286	5.79083	7	63.0086	6.50835	7
	4068	11.3286	5.79083	7	62.9995	6.61652	7
	4072	11.3286	5.79083	7	62.9905	6.74812	7
	4076	11.3286	5.79083	7	63.3371	6.93393	7
	4080	11.3286	5.79083	7	63.3133	7.08609	7
	4084	11.3286	5.79083	7	62.9257	7.18942	7
	4088	11.3286	5.79083	7	62.9167	7.31025	7
	4092	11.3286	5.79083	7	62.9076	7.44072	7
	4096	11.3286	5.79083	7	62.5281	7.52898	7
	4100	11.3286	5.79083	7	62.5191	7.55755	7
	4104	11.3286	5.79083	7	62.1395	7.55109	7
	4108	11.3286	5.79083	7	61.76	7.56102	7
	4112	11.3286	5.79083	7	62.1371	7.43436	7
	4116	11.3286	5.79083	7	62.5143	7.32266	7
	4120	11.3286	5.79083	7	62.5143	7.2629	7
	4124	11.3286	5.79083	7	62.5143	7.21486	7
	4128	11.3286	5.79083	7	62.8938	7.06894	7
	4132	11.3286	5.79083	7	63.2733	6.93809	7
	4136	11.3286	5.79083	7	63.2757	6.86924	7
	4140	11.3286	5.79083	7	63.2781	6.82512	7
	4144	11.3286	5.79083	7	63.2805	6.80621	7
	4148	11.3286	5.79083	7	63.6533	6.79008	7
	4152	11.3286	5.79083	7	64.031	6.83493	7
	4156	11.3286	5.79083	7	64.0381	6.92016	7
	4160	11.3286	5.79083	7	64.0381	6.97134	7
	4164	11.3286	5.79083	7	64.0381	7.03467	7
	4168	11.3286	5.79083	7	63.6676	7.07524	7
	4172	11.3286	5.79083	7	63.3109	6.99242	7
	4176	11.3286	5.79083	7	63.3248	6.96368	7
	4180	11.3286	5.79083	7	63.7019	7.01336	7
	4184	11.3286	5.79083	7	64.079	7.08044	7
	4188	10.951	5.5978	7	64.079	7.20432	7
	4192	10.5733	5.40478	7	64.079	7.33811	7
	4196	10.5733	5.40478	7	64.0857	7.37969	7
	4200	10.5733	5.40478	7	64.0857	7.37969	7
	4204	10.5733	5.40478	7	64.4581	7.27104	7
	4208	10.5733	5.40478	7	64.46	7.25587	7
	4212	10.9448	5.38183	7	64.4619	7.25351	7
	4216	11.3162	5.36604	7	64.8343	7.16129	7
	4220	11.6876	5.35748	7	65.2067	7.07335	7
	4224	12.059	5.35619	7	65.2086	6.93118	7
	4228	12.4305	5.36217	7	65.2105	6.799	7
	4232	12.8019	5.37539	7	65.2057	6.76997	7
	4236	13.1733	5.3958	7	65.201	6.75333	7
	4240	13.5448	5.42332	7	65.9505	6.63948	7
	4244	13.5448	5.42332	7	66.7	6.53401	7
	4248	13.5448	5.42332	7	66.7062	6.45954	7
	4252	13.5448	5.42332	7	66.7124	6.41134	7
	4256	13.5448	5.42332	7	66.7186	6.38999	7
	4260	13.9162	5.45784	7	67.0886	6.4335	7
	4264	14.2876	5.49923	7	67.4586	6.49538	7
	4268	14.6591	5.54734	7	67.4581	6.69659	7
	4272	15.0305	5.602	7	67.0805	6.9199	7
	4276	15.0305	5.602	7	67.0733	7.02843	7
	4280	15.0305	5.602	7	67.4457	7.02728	7
	4284	15.0305	5.602	7	67.8181	7.03163	7
	4288	15.0305	5.602	7	68.1905	7.04148	7
	4292	15.0305	5.602	7	68.9262	7.10633	7
	4296	14.6529	5.42733	7	69.6619	7.18021	7
	4300	14.2752	5.25394	7	70.0343	7.20449	7
	4304	13.8976	5.08197	7	70.4067	7.23404	7
	4308	14.2752	5.25394	7	70.4167	7.21508	7
	4312	14.6529	5.42733	7	70.4357	7.05497	7
	4316	14.6529	5.42733	7	70.4548	6.91707	7
	4320	14.6529	5.42733	7	70.4876	6.73919	7
	4324	14.6529	5.42733	7	70.1481	6.52927	7
	4328	14.6529	5.42733	7	69.8086	6.34546	7
	4332	14.2814	5.36994	7	69.469	6.19009	7
	4336	13.91	5.31927	7	69.1295	6.06534	7
	4340	13.5386	5.27549	7	68.79	5.97314	7
	4344	13.1671	5.23879	7	69.1914	5.75507	7
	4348	12.7957	5.20932	7	69.9562	5.57921	7
	4352	12.0467	4.99935	7	70.7129	5.41832	7
	4356	11.2976	4.79396	7	71.4695	5.2812	7
	4360	10.5486	4.59374	7	71.8491	5.10498	7
	4364	10.1709	4.40366	7	72.2286	4.94756	7
	4368	9.79333	4.21384	7	72.9719	4.86076	7
	4372	9.41571	4.02433	7	73.3514	4.74712	7
	4376	9.0381	3.83517	7	73.3586	4.577	7
	4380	8.28905	3.63566	7	73.0019	4.38489	7
	4384	7.54	3.44377	7	72.6452	4.23446	7
	4388	6.79095	3.26084	7	72.6609	4.19009	7
	4392	6.0419	3.08844	7	73.0405	4.21344	7
	4396	5.66429	2.89542	7	73.0476	4.20975	7
	4400	5.28667	2.70239	7	72.691	4.21943	7
	4404	4.90905	2.50936	7	72.7067	4.31535	7
	4408	4.53143	2.31633	7	72.36	4.47828	7
	4412	4.15381	2.12331	7	71.641	4.64612	7
	4416	4.15381	2.12331	7	70.9219	4.85864	7
	4420	4.15381	2.12331	7	70.2029	5.11025	7
	4424	4.15381	2.12331	7	69.4838	5.3955	7
	4428	3.77619	1.93028	7	69.1271	5.65305	7
	4432	3.39857	1.73725	7	68.7614	5.70892	7
	4436	3.02095	1.54422	7	68.0252	5.75922	7
	4440	2.64333	1.35119	7	67.6524	5.84998	7
	4444	2.26571	1.15817	7	67.2795	5.96223	7
	4448	1.8881	0.965139	7	66.9067	6.09479	7
	4452	1.51048	0.772111	7	66.5338	6.24636	7
	4456	1.13286	0.579083	7	66.5314	6.44658	7
	4460	0.755238	0.386055	7	66.529	6.66925	7
	4464	0.377619	0.193028	7	66.1562	6.86984	7
	4468	0	0	7	65.0495	6.97175	7
	4472	0.371429	0.197359	7	63.5805	7.11995	7
	4476	0.742857	0.394718	7	62.4819	7.17434	7
	4480	0.742857	0.394718	7	61.7538	7.27927	7
	4484	0.742857	0.394718	7	60.6552	7.4914	7
	4488	0.742857	0.394718	7	59.5567	7.70985	7
	4492	0.742857	0.394718	7	58.4514	7.80673	7
	4496	0.742857	0.394718	7	57.7186	7.83894	7
	4500	1.12048	0.415448	7	56.9857	7.87986	7
	4504	1.49809	0.513723	7	56.2529	7.92935	7
	4508	1.87571	0.655549	7	55.1476	8.05503	7
	4512	2.25333	0.818595	7	53.6786	8.27519	7
	4516	2.63095	0.992457	7	52.9457	8.34324	7
	4520	3.00857	1.17233	7	52.5767	8.33628	7
	4524	3.75762	1.4005	7	51.8352	8.41313	7
	4528	4.50667	1.63719	7	51.4562	8.42124	7
	4532	5.25571	1.87919	7	51.8119	8.28511	7
	4536	6.00476	2.12467	7	52.1676	8.16282	7
	4540	6.75381	2.37257	7	52.8938	8.03043	7
	4544	7.13143	2.53268	7	53.62	7.90507	7
	4548	7.50905	2.69709	7	53.9757	7.81484	7
	4552	7.88667	2.86508	7	54.3314	7.74056	7
	4556	8.26429	3.03605	7	54.6805	7.5756	7
	4560	8.6419	3.20952	7	55.0295	7.42477	7
	4564	9.01952	3.38511	7	55.3786	7.28895	7
	4568	9.39714	3.5625	7	56.0981	7.12837	7
	4572	9.77476	3.74145	7	57.1948	7.03005	7
	4576	10.1524	3.92172	7	57.9209	6.97694	7
	4580	10.53	4.10316	7	58.6471	6.93396	7
	4584	10.9076	4.28561	7	59.7457	6.79877	7
	4588	11.2852	4.46895	7	60.8443	6.67489	7
	4592	11.2914	4.62497	7	61.9429	6.56296	7
	4596	11.2976	4.79396	7	62.6709	6.57814	7
	4600	11.6752	4.98308	7	62.279	6.72366	7
	4604	12.0529	5.17249	7	62.6281	6.71987	7
	4608	12.4305	5.36217	7	62.9771	6.73571	7
	4612	12.8081	5.55207	7	63.3262	6.77104	7
	4616	13.1857	5.74218	7	63.6752	6.82555	7
	4620	13.1857	5.74218	7	64.0243	6.89881	7
	4624	13.1857	5.74218	7	64.3733	6.9902	7
	4628	13.1857	5.74218	7	65.47	7.02689	7
	4632	13.1857	5.74218	7	67.3095	6.86123	7
	4636	13.1857	5.74218	7	68.7852	6.64008	7
	4640	13.1857	5.74218	7	69.5133	6.57923	7
	4644	12.8143	5.73838	7	70.2414	6.53989	7
	4648	12.4429	5.74137	7	70.5971	6.60134	7
	4652	12.0714	5.75114	7	69.8562	6.58842	7
	4656	11.7	5.76764	7	69.1152	6.58544	7
	4660	11.3286	5.79083	7	68.0038	6.62789	7
	4664	11.3286	5.79083	7	67.2695	6.62605	7
	4668	11.3286	5.79083	7	66.9057	6.58896	7
	4672	11.3286	5.79083	7	66.1648	6.61401	7
	4676	11.3286	5.79083	7	65.801	6.58832	7
	4680	11.3286	5.79083	7	65.4371	6.56876	7
	4684	12.0624	5.74735	7	65.4371	6.56876	7
	4688	12.7962	5.71587	7	65.0667	6.61256	7
	4692	13.1676	5.70432	7	63.9552	6.70456	7
	4696	13.1676	5.70432	7	62.8438	6.80849	7
	4700	13.1676	5.70432	7	62.0962	6.92981	7
	4704	13.1676	5.70432	7	60.9762	7.11995	7
	4708	13.539	5.6996	7	60.2267	7.25583	7
	4712	13.9105	5.7017	7	59.8476	7.34497	7
	4716	14.2819	5.71063	7	59.4686	7.45038	7
	4720	14.6533	5.72635	7	59.8391	7.40944	7
	4724	15.0248	5.7488	7	59.8391	7.40944	7
	4728	15.3962	5.77792	7	59.8391	7.40944	7
	4732	15.3962	5.77792	7	60.2095	7.37358	7
	4736	15.3962	5.77792	7	60.58	7.34289	7
	4740	15.3962	5.77792	7	61.321	7.218	7
	4744	15.3962	5.77792	7	62.0619	7.1006	7
	4748	15.3962	5.77792	7	61.6848	7.1902	7
	4752	15.3962	5.77792	7	60.9419	7.37064	7
	4756	15.3962	5.77792	7	60.5695	7.46066	7
	4760	15.3962	5.77792	7	61.3171	7.28343	7
	4764	15.3962	5.77792	7	61.6943	7.20134	7
	4768	15.3962	5.77792	7	62.4438	7.02671	7
	4772	15.3962	5.77792	7	63.5571	6.86727	7
	4776	15.3962	5.77792	7	64.2981	6.80942	7
	4780	15.3962	5.77792	7	65.0391	6.76078	7
	4784	15.3962	5.77792	7	65.4029	6.7869	7
	4788	15.3962	5.77792	7	65.7667	6.81892	7
	4792	15.3962	5.77792	7	66.5076	6.79021	7
	4796	15.3962	5.77792	7	67.2419	6.72833	7
	4800	15.3962	5.77792	7	67.9762	6.67608	7
	4804	14.6624	5.76788	7	68.3467	6.57964	7
	4808	13.9286	5.77005	7	68.7238	6.51244	7
	4812	13.5571	5.75275	7	69.4714	6.42031	7
	4816	13.5571	5.75275	7	69.8419	6.39625	7
	4820	13.5571	5.75275	7	69.8486	6.33247	7
	4824	13.5571	5.75275	7	69.4848	6.29285	7
	4828	13.1857	5.74218	7	69.1209	6.25953	7
	4832	12.8143	5.73838	7	68.3867	6.24833	7
	4836	12.4429	5.74137	7	68.0162	6.27029	7
	4840	12.0714	5.75114	7	68.0229	6.24425	7
	4844	11.7	5.76764	7	68.0295	6.23152	7
	4848	11.3286	5.79083	7	67.659	6.27341	7
	4852	11.3286	5.79083	7	67.2886	6.32123	7
	4856	11.3286	5.79083	7	67.659	6.22955	7
	4860	11.3286	5.79083	7	67.659	6.22955	7
	4864	11.3286	5.79083	7	68.0362	6.18801	7
	4868	11.3286	5.79083	7	68.42	6.04439	7
	4872	11.3286	5.79083	7	68.0495	5.98602	7
	4876	11.3286	5.79083	7	67.3086	6.02137	7
	4880	11.3286	5.79083	7	66.1952	6.17893	7
	4884	11.3286	5.79083	7	65.4457	6.34309	7
	4888	11.3286	5.79083	7	64.6962	6.51351	7
	4892	11.3286	5.79083	7	64.6876	6.59044	7
	4896	11.7	5.76764	7	65.0514	6.56501	7
	4900	12.0714	5.75114	7	65.4152	6.55781	7
	4904	12.4429	5.74137	7	65.779	6.56887	7
	4908	12.8143	5.73838	7	66.1429	6.59812	7
	4912	13.1857	5.74218	7	66.5067	6.6453	7
	4916	13.5571	5.75275	7	66.8771	6.64058	7
	4920	13.551	5.58272	7	67.2476	6.64176	7
	4924	13.5448	5.42332	7	67.6181	6.64884	7
	4928	13.5386	5.27549	7	67.9819	6.73043	7
	4932	13.5324	5.14025	7	68.3391	6.8098	7
	4936	13.9038	5.19366	7	69.0733	6.79701	7
	4940	14.2752	5.25394	7	69.8076	6.79423	7
	4944	14.2691	5.15213	7	71.2848	6.67974	7
	4948	14.2629	5.06535	7	72.7619	6.57775	7
	4952	14.2567	4.9944	7	74.2391	6.48886	7
	4956	13.879	4.83951	7	75.3524	6.38668	7
	4960	13.5014	4.68745	7	75.7181	6.42027	7
	4964	13.8729	4.79216	7	76.0838	6.47154	7
	4968	14.2443	4.90257	7	76.8267	6.3978	7
	4972	14.6157	5.01833	7	77.5695	6.33312	7
	4976	14.6095	5.00766	7	77.5714	6.23088	7
	4980	14.6033	5.01424	7	77.5733	6.14129	7
	4984	14.2257	4.89578	7	77.1981	6.21637	7
	4988	13.8481	4.78218	7	77.1867	6.33839	7
	4992	13.4705	4.67379	7	78.3	6.1359	7
	4996	13.0929	4.57099	7	79.0429	5.89906	7
	5000	12.7152	4.47415	7	79.7857	5.68021	7
	5004	12.3376	4.38368	7	80.1648	5.42448	7
	5008	12.3314	4.46811	7	80.5438	5.18104	7
	5012	12.3252	4.56993	7	81.2933	4.96089	7
	5016	12.3252	4.56993	7	81.6805	4.6985	7
	5020	12.3252	4.56993	7	82.0676	4.44952	7
	5024	11.9476	4.50853	7	82.091	4.15964	7
	5028	11.57	4.45467	7	82.1143	3.89457	7
	5032	11.1924	4.4086	7	82.1376	3.6597	7
	5036	10.8148	4.37058	7	82.1609	3.4612	7
	5040	10.4433	4.18315	7	82.1843	3.30562	7
	5044	10.0719	3.99667	7	82.2076	3.19923	7
	5048	9.70048	3.81129	7	82.231	3.14702	7
	5052	9.32905	3.62718	7	82.2543	3.15169	7
	5056	8.58	3.39917	7	82.2776	3.21298	7
	5060	7.83095	3.17557	7	82.301	3.32777	7
	5064	7.45952	2.98796	7	81.9519	3.4168	7
	5068	7.0881	2.8017	7	81.6029	3.54106	7
	5072	6.71667	2.61706	7	81.2538	3.69699	7
	5076	6.71667	2.61706	7	80.9048	3.88077	7
	5080	6.71667	2.61706	7	80.9262	4.05368	7
	5084	5.96762	2.39037	7	81.31	4.13174	7
	5088	5.6354	2.38402	7	81.6938	4.2404	7
	5092	5.30318	2.39505	7	82.0776	4.37737	7
	5096	5.34857	2.41926	7	82.4614	4.5401	7
	5100	5.39397	2.44387	7	82.8452	4.72593	7
	5104	5.81079	2.66386	7	83.2291	4.93225	7
	5108	6.22762	2.88442	7	83.6129	5.15659	7
	5112	6.64444	3.10541	7	83.249	5.31199	7
	5116	7.48524	3.32572	7	83.2557	5.48242	7
	5120	8.32603	3.5558	7	83.2624	5.66335	7
	5124	9.16682	3.79388	7	83.6395	5.88762	7
	5128	9.21936	3.6413	7	83.6462	6.09448	7
	5132	9.27191	3.51063	6	82.5324	6.20644	7
	5136	8.94683	3.34014	6	81.781	6.24791	7
	5140	8.62175	3.17414	6	81.0295	6.31475	7
	5144	8.67429	3.09073	6	80.6419	6.22481	7
	5148	8.72682	3.03808	6	80.2543	6.15444	7
	5152	8.77937	3.01782	6	79.8667	6.10431	7
	5156	8.83191	3.03058	6	79.1086	6.0262	7
	5160	9.25587	3.18432	6	78.3505	5.97387	7
	5164	10.0967	3.47138	6	77.5924	5.94798	7
	5168	10.9375	3.75866	6	77.2048	5.92006	7
	5172	11.7782	4.04611	6	76.8171	5.91398	7
	5176	12.619	4.33371	6	76.4295	5.92981	7
	5180	13.4598	4.62142	6	76.0419	5.96737	7
	5184	14.3006	4.90923	6	75.6543	6.05623	7
	5188	15.1414	5.19712	6	75.2667	6.16467	7
	5192	15.9822	5.48508	6	74.8791	6.29167	7
	5196	16.823	5.77309	6	74.8709	6.37914	7
	5200	17.6638	6.06115	6	74.8629	6.47956	7
	5204	18.5046	6.34926	6	74.4924	6.53562	7
	5208	18.9286	6.50056	6	74.1219	6.59715	7
	5212	19.3525	6.65564	6	73.3719	6.71623	7
	5216	19.7765	6.81421	6	72.9924	6.77349	7
	5220	20.2005	6.97606	6	72.6129	6.83565	7
	5224	20.6244	7.14095	6	71.8629	6.9691	7
	5228	21.0484	7.30868	6	71.1129	7.10926	7
	5232	21.4724	7.47906	6	70.7333	7.1824	7
	5236	21.4724	7.47906	6	70.3538	7.25986	7
	5240	21.109	7.35685	6	69.9743	7.3415	7
	5244	20.7456	7.23766	6	69.5948	7.4272	7
	5248	21.2871	7.22274	6	69.5857	7.45411	7
	5252	21.8286	7.22981	6	69.9562	7.39619	7
	5256	21.8927	7.07078	6	70.3267	7.34315	7
	5260	21.9568	6.92427	6	70.6971	7.2951	7
	5264	21.5328	6.78064	6	71.0676	7.25214	7
	5268	21.1088	6.64112	6	71.8176	7.11654	7
	5272	20.6849	6.50598	6	72.5676	6.98767	7
	5276	20.7383	6.58217	6	73.6881	6.87944	7
	5280	20.7917	6.67492	6	74.8086	6.78208	7
	5284	20.4283	6.61058	6	75.5495	6.78352	7
	5288	20.0649	6.55124	6	75.92	6.81235	7
	5292	19.7015	6.49702	6	76.2905	6.8468	7
	5296	19.3381	6.44806	5	76.6609	6.88676	7
	5300	18.9747	6.40449	5	77.0314	6.93215	7
	5304	18.6113	6.3664	5	77.4019	6.91308	7
	5308	17.7705	6.09584	5	77.3952	6.8544	7
	5312	16.9297	5.82699	5	77.3886	6.80749	7
	5316	16.089	5.56012	5	77.0024	6.86805	7
	5320	15.2482	5.29552	5	76.2457	6.93839	7
	5324	14.4074	5.03355	5	75.4891	7.01715	7
	5328	13.5666	4.77465	5	74.3619	7.05688	7
	5332	12.7258	4.51933	5	73.6143	6.99971	7
	5336	11.885	4.26825	5	73.2438	6.99395	7
	5340	11.0442	4.02219	5	72.8733	6.99379	7
	5344	10.2034	3.78215	5	72.8733	6.99379	7
	5348	9.3626	3.54933	5	72.5029	6.95525	7
	5352	8.52181	3.32525	5	72.1324	6.92216	7
	5356	7.68102	3.11181	5	72.1257	6.74981	7
	5360	7.20362	2.8674	5	72.1281	6.4832	7
	5364	6.72622	2.62583	4	71.7681	6.17604	7
	5368	5.76076	2.33386	4	71.0443	6.03039	7
	5372	4.7953	2.05384	4	70.691	5.91301	7
	5376	4.30724	2.04846	4	70.7	5.85641	7
	5380	3.81917	2.07398	4	70.7091	5.81415	7
	5384	3.81917	2.07398	4	70.7091	5.81415	7
	5388	3.81917	2.07398	4	70.3295	5.89512	7
	5392	3.81917	2.07398	4	69.95	5.98114	7
	5396	3.34178	1.81473	4	69.2	6.11404	7
	5400	2.86438	1.55548	4	68.45	6.25459	7
	5404	2.38698	1.29624	4	67.7091	6.29646	7
	5408	1.90959	1.03699	4	67.3319	6.22354	7
	5412	1.43219	0.777742	4	66.9548	6.17087	7
	5416	0.954794	0.518494	4	66.2138	6.24966	7
	5420	0.477397	0.259247	4	65.4729	6.33833	7
	5424	0	0	4	64.7319	6.43646	7
	5428	0	0	4	65.1181	6.40722	7
	5432	0	0	4	65.5043	6.39659	7
	5436	0	0	4	65.5109	6.47447	7
	5440	0.562167	0.304437	4	65.8881	6.48604	7
	5444	1.12433	0.608873	4	66.2652	6.51688	7
	5448	1.12433	0.608873	4	67.3833	6.45068	7
	5452	1.12433	0.608873	4	68.5014	6.39823	7
	5456	1.12433	0.608873	4	68.5095	6.29642	7
	5460	1.12433	0.608873	4	68.5176	6.20767	7
	5464	1.12433	0.608873	4	68.1552	6.18525	7
	5468	1.12433	0.608873	4	68.1633	6.12467	7
	5472	1.12433	0.608873	4	67.801	6.10792	7
	5476	1.12433	0.608873	4	67.0748	6.21827	7
	5480	1.12433	0.608873	4	66.3395	6.39212	7
	5484	1.12433	0.608873	4	65.9667	6.58443	7
	5488	1.12433	0.608873	4	66.3214	6.53836	7
	5492	1.12433	0.608873	4	66.6762	6.51157	7
	5496	1.12433	0.608873	4	66.3048	6.61914	7
	5500	1.12433	0.608873	4	65.9333	6.74399	7
	5504	1.12433	0.608873	4	65.58	6.70338	7
	5508	1.12433	0.608873	4	65.2267	6.68142	7
	5512	1.12433	0.608873	4	64.4938	6.7679	7
	5516	1.12433	0.608873	4	64.1314	6.88437	7
	5520	1.12433	0.608873	4	63.5845	7.04333	7
	5524	1.12433	0.608873	4	63.8156	7.0969	7
	5528	1.12433	0.608873	4	63.6828	7.25602	7
	5532	1.12433	0.608873	4	63.55	7.42136	7
	5536	1.12433	0.608873	4	63.781	7.48089	7
	5540	1.12433	0.608873	4	64.4216	7.42566	7
	5544	1.12433	0.608873	4	65.0621	7.37832	7
	5548	1.12433	0.608873	4	64.5432	7.48701	7
	5552	1.12433	0.608873	4	64.0242	7.60044	7
	5556	1.12433	0.608873	4	64.2943	7.51777	7
	5560	0.562167	0.304437	4	64.5644	7.44093	7
	5564	0	0	4	64.8344	7.37012	7
	5568	0	0	4	64.734	7.38612	7
	5572	0	0	4	64.2241	7.49302	7
	5576	0	0	4	64.0766	7.57523	6
	5580	0	0	4	63.929	7.67122	6
	5584	0	0	4	64.152	7.68039	6
	5588	0	0	4	64.3749	7.69708	6
	5592	0	0	4	64.5979	7.72124	6
	5596	0	0	4	64.8208	7.7528	6
	5600	0	0	4	65.0437	7.79167	6
	5604	0	0	4	65.2667	7.83774	6
	5608	0	0	4	65.1258	7.96995	6
	5612	0	0	4	65.0413	8.10523	6
	5616	0	0	4	65.3207	8.17516	6
	5620	0	0	4	65.6001	8.26263	6
	5624	0	0	4	65.8704	8.32972	6
	5628	0	0	4	66.1407	8.40237	6
	5632	0	0	4	66.7906	8.4006	6
	5636	0	0	4	67.4404	8.40869	6
	5640	0	0	4	68.2748	8.39327	6
	5644	0	0	4	69.1185	8.1773	6
	5648	0	0	4	69.9622	7.96597	6
	5652	0	0	4	70.8059	7.75967	6
	5656	0	0	4	71.2329	7.69082	6
	5660	0	0	4	71.6598	7.62756	6
	5664	0	0	4	72.0867	7.57004	6
	5668	0	0	4	72.9231	7.39566	6
	5672	0	0	4	73.7595	7.22918	6
	5676	0	0	4	74.6033	7.03757	6
	5680	0	0	4	75.447	6.8528	6
	5684	0	0	4	75.8739	6.81959	6
	5688	0	0	4	76.3008	6.79321	6
	5692	0	0	4	77.1372	6.64484	6
	5696	0	0	4	78.3905	6.34926	6
	5700	0	0	4	79.6437	6.05688	6
	5704	0	0	4	80.4802	5.92912	6
	5708	0	0	4	81.3166	5.81362	6
	5712	0	0	4	82.153	5.71112	6
	5716	0	0	4	82.9894	5.62233	6
	5720	0	0	4	83.8259	5.54791	6
	5724	0	0	4	84.6623	5.48844	6
	5728	0	0	4	85.4987	5.44442	6
	5732	0	0	4	85.85	5.39301	6
	5736	0	0	4	86.2012	5.35254	6
	5740	0	0	4	86.5524	5.32326	6
	5744	0	0	4	86.9036	5.30536	6
	5748	0	0	4	87.73	5.05544	6
	5752	0	0	4	88.5563	4.81048	6
	5756	0	0	4	88.2608	4.79233	6
	5760	0	0	4	87.421	4.80008	6
	5764	0	0	4	86.718	4.75588	6
	5768	0	0	4	86.0151	4.7305	6
	5772	0	0	3	85.8803	4.72181	6
	5776	0	0	3	85.6086	4.78577	6
	5780	0	0	3	84.9274	4.87965	6
	5784	0	0	3	84.2463	4.99094	6
	5788	0	0	3	84.1094	5.06114	5
	5792	0	0	3	84.5262	4.85961	5
	5796	0	0	3	84.5262	4.85961	5
	5800	0	0	3	84.5262	4.85961	5
	5804	0	0	3	84.9431	4.6602	4
	5808	0	0	3	85.3599	4.46321	4
	5812	0	0	3	85.7767	4.26897	4
	5816	0	0	3	85.7767	4.26897	4
	5820	0	0	3	85.7767	4.26897	4
	5824	0	0	3	86.1935	4.07788	4
	5828	0	0	3	86.6104	3.89039	4
	5832	0	0	3	87.0272	3.70706	4
	5836	0	0	3	86.8997	3.64452	4
	5840	0	0	3	86.7722	3.63074	4
	5844	0	0	3	86.6447	3.66627	4
	5848	0	0	2	86.5172	3.7497	4
	5852	0	0	2	86.448	3.86429	4
	5856	0	0	2	86.3787	4.02618	4
	5860	0	0	2	86.3095	4.22994	4
	5864	0	0	2	86.2403	4.46987	4
	5868	0	0	2	85.696	4.75639	4
	5872	0	0	2	85.1517	5.0461	4
	5876	0	0	2	85.7292	5.34678	4
	5880	0	0	2	86.851	5.38201	4
	5884	0	0	2	87.4192	5.42737	4
	5888	0	0	2	87.9873	5.4886	4
	5892	0	0	2	87.9873	5.4886	4
	5896	0	0	2	88.541	5.50117	4
	5900	0	0	2	89.0947	5.53076	4
	5904	0	0	2	89.6483	5.5771	4
	5908	0	0	2	89.6577	5.95309	4
	5912	0	0	2	89.1133	6.26641	4
	5916	0	0	2	88.569	6.57973	4
	5920	0	0	2	88.0247	6.89305	4
	5924	0	0	2	87.4803	7.20637	4
	5928	0	0	2	86.936	7.51969	4
	5932	0	0	2	86.3917	7.83301	4
	5936	0	0	2	85.8473	8.14633	4
	5940	0	0	2	85.303	8.45965	4
	5944			2			4
	5948			2			4
	5952			2			4
	5956			2			4
	5960			2			4
	5964			2			4
	5968			2			4
	5972			2			4
	5976			2			4
	5980			2			4
	5984			2			4
	5988			2			4
	5992			2			4
	5996			2			4
	6000			0			0
