# Supplementary material for: Microglia facilitate and stabilize the response to general anesthesia via modulating the neuronal network in a brain region-specific manner
Source: eLife. 2023 Dec 22;12:RP92252. doi: 10.7554/eLife.92252 (PMC10746144; doi:10.7554/eLife.92252)
Supplement: Figure 5—source data 1. [file elife-92252-fig5-data1.xlsx]

## Sheet: Figure 5C
	Induction time				Emergence time
	D7	D21	Statistical test		D7	D21	Statistical test
	156	180	paired t test		143	94	paired t test
	124	228			172	112
	138	148			146	95
	100	128			180	75
	112	160			180	118
