# Supplementary material for: Microglia facilitate and stabilize the response to general anesthesia via modulating the neuronal network in a brain region-specific manner
Source: eLife. 2023 Dec 22;12:RP92252. doi: 10.7554/eLife.92252 (PMC10746144; doi:10.7554/eLife.92252)
Supplement: Figure 5—source data 2. [file elife-92252-fig5-data2.xlsx]

## Sheet: Figure 5D
		Normalized power during consciousness									Normalized power during induction									Normalized power during emergence
		D7			D21			Statistical test			D7			D21			Statistical test			D7			D21			Statistical test
	Frequency	Mean	SEM	N	Mean	SEM	N	paired t test		Frequency	Mean	SEM	N	Mean	SEM	N	paired t test		Frequency	Mean	SEM	N	Mean	SEM	N	paired t test
	0	0.067834	0.015592	5	0.04043	0.0172655	5			0	0.0216	0.002069	5	0.0153719	0.00688909	5			0	0.0473201	0.0307411	5	0.0211649	0.00956325	5
	0.061035	0.067869	0.015498	5	0.040518	0.0173134	5			0.0610352	0.02255	0.002476	5	0.015271	0.00682183	5			0.0610352	0.0476546	0.0308679	5	0.021267	0.0095542	5
	0.12207	0.067969	0.015264	5	0.040794	0.0173431	5			0.12207	0.024403	0.003225	5	0.0151404	0.0067024	5			0.12207	0.0486225	0.0312121	5	0.0216019	0.00953857	5
	0.183105	0.0683	0.014982	5	0.041289	0.0171984	5			0.183105	0.025546	0.00336	5	0.015294	0.00668841	5			0.183105	0.0501409	0.0316875	5	0.0222506	0.00956104	5
	0.244141	0.069298	0.01471	5	0.042037	0.0169572	5			0.244141	0.025821	0.002801	5	0.0158146	0.00683781	5			0.244141	0.0521257	0.0322039	5	0.0233101	0.00969159	5
	0.305176	0.07124	0.014395	5	0.043063	0.0168621	5			0.305176	0.026359	0.002371	5	0.016472	0.0070447	5			0.305176	0.0545301	0.0327114	5	0.0248241	0.00996659	5
	0.366211	0.073819	0.013913	5	0.044398	0.0170056	5			0.366211	0.027778	0.002618	5	0.0170634	0.00719417	5			0.366211	0.0573747	0.0332349	5	0.026747	0.0103492	5
	0.427246	0.076483	0.0132	5	0.046103	0.0172445	5			0.427246	0.029639	0.00321	5	0.0177173	0.00734186	5			0.427246	0.060756	0.0338788	5	0.0289937	0.0107783	5
	0.488281	0.079186	0.012357	5	0.048283	0.0174717	5			0.488281	0.031668	0.003529	5	0.0187065	0.00761982	5			0.488281	0.0647879	0.0347597	5	0.03152	0.0112531	5
	0.549316	0.082452	0.011577	5	0.051021	0.0178023	5			0.549316	0.034432	0.003655	5	0.0200665	0.00800486	5			0.549316	0.0694846	0.0358959	5	0.0343409	0.0118392	5
	0.610352	0.086606	0.010981	5	0.054263	0.0183471	5			0.610352	0.038329	0.004152	5	0.0216554	0.00834207	5			0.610352	0.0746974	0.0371667	5	0.037488	0.012589	5
	0.671387	0.091261	0.010574	5	0.057756	0.018983	5			0.671387	0.042707	0.005028	5	0.023528	0.00859588	5			0.671387	0.0801838	0.0384022	5	0.0409714	0.0134765	5
	0.732422	0.09573	0.010253	5	0.061178	0.0195008	5			0.732422	0.046616	0.005709	5	0.0258679	0.00888878	5			0.732422	0.0857241	0.0394879	5	0.0447552	0.0144112	5
	0.793457	0.099662	0.009848	5	0.064322	0.0198771	5			0.793457	0.049927	0.005925	5	0.0284893	0.0092315	5			0.793457	0.0911452	0.0403452	5	0.0487222	0.0153102	5
	0.854492	0.103037	0.009196	5	0.067143	0.0202343	5			0.854492	0.053092	0.006001	5	0.0308706	0.00942384	5			0.854492	0.096282	0.0408594	5	0.0526767	0.0161282	5
	0.915527	0.105791	0.008309	5	0.069607	0.0205132	5			0.915527	0.056211	0.006304	5	0.0329311	0.00936172	5			0.915527	0.101021	0.0409367	5	0.0564573	0.0168453	5
	0.976563	0.107847	0.007387	5	0.071631	0.0204273	5			0.976562	0.059076	0.006678	5	0.0353242	0.00927609	5			0.976562	0.105422	0.0406413	5	0.0600668	0.0174504	5
	1.0376	0.109413	0.006553	5	0.073221	0.0198574	5			1.0376	0.061925	0.006752	5	0.0385455	0.00945508	5			1.0376	0.109696	0.0401656	5	0.0636248	0.0179394	5
	1.09863	0.110829	0.005719	5	0.074591	0.0190804	5			1.09863	0.065335	0.006508	5	0.0421556	0.0097069	5			1.09863	0.113976	0.0395854	5	0.0671601	0.0183305	5
	1.15967	0.112044	0.004781	5	0.075955	0.0184474	5			1.15967	0.069371	0.006285	5	0.0454938	0.00953695	5			1.15967	0.118108	0.038718	5	0.0705289	0.0186557	5
	1.2207	0.112598	0.003863	5	0.07723	0.0179382	5			1.2207	0.073605	0.006212	5	0.0488773	0.00905453	5			1.2207	0.121763	0.0373302	5	0.0736109	0.0189226	5
	1.28174	0.112298	0.003168	5	0.078126	0.0172442	5			1.28174	0.078116	0.006072	5	0.053287	0.0090188	5			1.28174	0.124761	0.035443	5	0.076514	0.0191044	5
	1.34277	0.111635	0.002814	5	0.078601	0.0162713	5			1.34277	0.083655	0.006004	5	0.0588704	0.00975138	5			1.34277	0.127237	0.0333248	5	0.0794613	0.0191917	5
	1.40381	0.111267	0.002831	5	0.079042	0.0153037	5			1.40381	0.090474	0.006815	5	0.0645866	0.0107382	5			1.40381	0.129484	0.0312053	5	0.0824962	0.0192369	5
	1.46484	0.111274	0.003087	5	0.079839	0.0146052	5			1.46484	0.097749	0.008743	5	0.0695679	0.0114898	5			1.46484	0.131721	0.0291315	5	0.0854409	0.0193168	5
	1.52588	0.111205	0.00344	5	0.080883	0.0140727	5			1.52588	0.104749	0.010821	5	0.0740543	0.0121104	5			1.52588	0.134019	0.0271293	5	0.0881737	0.0194391	5
	1.58691	0.110761	0.00388	5	0.081737	0.013446	5			1.58691	0.111816	0.012363	5	0.0785827	0.0129687	5			1.58691	0.136376	0.025322	5	0.0907958	0.0195239	5
	1.64795	0.110117	0.004506	5	0.08223	0.0127108	5			1.64795	0.1193	0.013383	5	0.0830192	0.0141791	5			1.64795	0.138756	0.0237848	5	0.0934322	0.0195099	5
	1.70898	0.109552	0.005274	5	0.082645	0.0120689	5			1.70898	0.126102	0.013924	5	0.0870422	0.0154693	5			1.70898	0.141059	0.0223822	5	0.0959972	0.019434	5
	1.77002	0.109043	0.005914	5	0.083241	0.011599	5			1.77002	0.130617	0.013874	5	0.0909352	0.0163088	5			1.77002	0.143131	0.0208662	5	0.0983157	0.0193732	5
	1.83106	0.108389	0.006228	5	0.083865	0.0111757	5			1.83105	0.133123	0.013382	5	0.0950322	0.0166029	5			1.83105	0.144847	0.0191697	5	0.10041	0.0193335	5
	1.89209	0.107545	0.006419	5	0.084242	0.0107197	5			1.89209	0.135848	0.01288	5	0.0988366	0.0168968	5			1.89209	0.146206	0.0175077	5	0.102471	0.0192557	5
	1.95312	0.106695	0.006869	5	0.084442	0.0103422	5			1.95312	0.140143	0.012612	5	0.10175	0.0175696	5			1.95312	0.147369	0.0161332	5	0.104522	0.0191029	5
	2.01416	0.106034	0.007592	5	0.084763	0.0101386	5			2.01416	0.144815	0.012581	5	0.104458	0.0185321	5			2.01416	0.1486	0.0150601	5	0.106306	0.0188758	5
	2.07519	0.105574	0.008227	5	0.085225	0.00996214	5			2.0752	0.148184	0.012768	5	0.108339	0.0193425	5			2.0752	0.150076	0.0140678	5	0.107612	0.0185599	5
	2.13623	0.105127	0.008564	5	0.085507	0.00957058	5			2.13623	0.150733	0.013358	5	0.113302	0.019829	5			2.13623	0.151677	0.0129649	5	0.108594	0.0181192	5
	2.19727	0.104451	0.008845	5	0.085468	0.00897826	5			2.19727	0.15424	0.014349	5	0.117458	0.0202835	5			2.19727	0.153004	0.0118034	5	0.109616	0.0175901	5
	2.2583	0.103454	0.009332	5	0.08543	0.00845535	5			2.2583	0.158774	0.015149	5	0.119625	0.0209362	5			2.2583	0.153739	0.0108102	5	0.110816	0.0171031	5
	2.31934	0.102295	0.00983	5	0.085728	0.00821212	5			2.31934	0.162373	0.0153	5	0.121082	0.0217971	5			2.31934	0.154007	0.010092	5	0.111968	0.0167399	5
	2.38037	0.101244	0.009973	5	0.086192	0.00820313	5			2.38037	0.164015	0.015055	5	0.123783	0.0225182	5			2.38037	0.154266	0.00949361	5	0.112772	0.0164279	5
	2.44141	0.10041	0.009778	5	0.08635	0.00817905	5			2.44141	0.165218	0.014692	5	0.12747	0.022835	5			2.44141	0.154796	0.00883623	5	0.1132	0.0160488	5
	2.50244	0.099705	0.009639	5	0.086079	0.00797761	5			2.50244	0.167641	0.01384	5	0.129858	0.0226644	5			2.50244	0.155394	0.0081602	5	0.113497	0.0156261	5
	2.56348	0.099044	0.009762	5	0.085764	0.00770337	5			2.56348	0.170318	0.012353	5	0.12957	0.0218893	5			2.56348	0.155678	0.00770142	5	0.113915	0.0153027	5
	2.62451	0.098418	0.009925	5	0.085744	0.00756213	5			2.62451	0.170767	0.010648	5	0.127675	0.0206035	5			2.62451	0.155563	0.00755939	5	0.114482	0.0151382	5
	2.68555	0.097747	0.009901	5	0.085871	0.00759297	5			2.68555	0.16828	0.009413	5	0.126025	0.0192546	5			2.68555	0.15527	0.0075726	5	0.114997	0.0150148	5
	2.74658	0.096846	0.009839	5	0.08577	0.00759383	5			2.74658	0.164516	0.008836	5	0.12511	0.0183345	5			2.74658	0.154928	0.0076463	5	0.11523	0.0147919	5
	2.80762	0.095681	0.009991	5	0.08537	0.00740664	5			2.80762	0.16082	0.008064	5	0.124257	0.0178522	5			2.80762	0.154377	0.00781271	5	0.115135	0.0144959	5
	2.86865	0.094504	0.010238	5	0.084938	0.00716785	5			2.86865	0.156616	0.007116	5	0.123218	0.0177161	5			2.86865	0.153457	0.00810693	5	0.114881	0.0142711	5
	2.92969	0.093549	0.01023	5	0.08468	0.007111	5			2.92969	0.15117	0.006682	5	0.122589	0.0176385	5			2.92969	0.152306	0.00843491	5	0.114665	0.0141685	5
	2.99072	0.092708	0.009904	5	0.084519	0.00722182	5			2.99072	0.145648	0.006651	5	0.122708	0.0171561	5			2.99072	0.151225	0.00870033	5	0.114502	0.0140796	5
	3.05176	0.091742	0.009632	5	0.084321	0.00724715	5			3.05176	0.142102	0.006209	5	0.122942	0.0162635	5			3.05176	0.150333	0.00900779	5	0.114249	0.0138973	5
	3.11279	0.090692	0.009759	5	0.08415	0.0070676	5			3.11279	0.14091	0.005307	5	0.122457	0.0152618	5			3.11279	0.149511	0.00949042	5	0.113802	0.0136366	5
	3.17383	0.089811	0.010147	5	0.084143	0.00684513	5			3.17383	0.140455	0.005155	5	0.121395	0.0147254	5			3.17383	0.148639	0.0101533	5	0.113209	0.0133809	5
	3.23486	0.089098	0.010385	5	0.084245	0.00675669	5			3.23486	0.139292	0.006384	5	0.120856	0.0148487	5			3.23486	0.147709	0.0108663	5	0.112574	0.0131649	5
	3.2959	0.088277	0.010233	5	0.084223	0.00675171	5			3.2959	0.137562	0.007676	5	0.121622	0.015197	5			3.2959	0.146694	0.0115123	5	0.11194	0.0129575	5
	3.35693	0.08731	0.009859	5	0.08396	0.00668239	5			3.35693	0.135957	0.007586	5	0.123139	0.0156052	5			3.35693	0.145475	0.012125	5	0.11132	0.0127667	5
	3.41797	0.086591	0.009611	5	0.083622	0.00654756	5			3.41797	0.134357	0.006519	5	0.124083	0.0163067	5			3.41797	0.144026	0.0128336	5	0.110748	0.0126387	5
	3.479	0.086392	0.009609	5	0.083459	0.00646381	5			3.479	0.132279	0.005852	5	0.123963	0.0173013	5			3.479	0.142553	0.0136822	5	0.110202	0.0125392	5
	3.54004	0.086407	0.009702	5	0.083507	0.00645812	5			3.54004	0.130152	0.006002	5	0.123718	0.0178541	5			3.54004	0.141306	0.0145428	5	0.109525	0.012339	5
	3.60107	0.086159	0.009713	5	0.083558	0.00642575	5			3.60107	0.129094	0.006161	5	0.124376	0.0175153	5			3.60107	0.140283	0.0152898	5	0.10854	0.011972	5
	3.66211	0.085671	0.009637	5	0.083403	0.00625643	5			3.66211	0.129327	0.005867	5	0.125526	0.0168632	5			3.66211	0.139223	0.0159463	5	0.107285	0.0115564	5
	3.72315	0.085329	0.00963	5	0.08304	0.00593816	5			3.72314	0.129566	0.005341	5	0.12585	0.0165701	5			3.72314	0.137904	0.0166073	5	0.106014	0.0112543	5
	3.78418	0.085192	0.009768	5	0.08262	0.0055833	5			3.78418	0.128415	0.004892	5	0.125068	0.0164443	5			3.78418	0.136327	0.0172495	5	0.104923	0.0110461	5
	3.84522	0.08489	0.009897	5	0.082259	0.00534276	5			3.84521	0.12594	0.005101	5	0.124404	0.0157109	5			3.84521	0.134617	0.0177148	5	0.103946	0.0107623	5
	3.90625	0.084315	0.009825	5	0.081968	0.0053053	5			3.90625	0.123353	0.005513	5	0.12479	0.0142788	5			3.90625	0.132863	0.0179224	5	0.1029	0.010333	5
	3.96728	0.083944	0.009627	5	0.081735	0.00538737	5			3.96729	0.121399	0.005615	5	0.125526	0.0130997	5			3.96729	0.131132	0.0179845	5	0.101779	0.00990377	5
	4.02832	0.084159	0.009615	5	0.081584	0.00539513	5			4.02832	0.119756	0.005639	5	0.12547	0.0126171	5			4.02832	0.129531	0.0180734	5	0.100774	0.00963075	5
	4.08936	0.084569	0.009929	5	0.081499	0.00525967	5			4.08936	0.118067	0.005918	5	0.124825	0.0122039	5			4.08936	0.128149	0.0182147	5	0.0999838	0.00944641	5
	4.15039	0.084436	0.010302	5	0.081366	0.00513429	5			4.15039	0.116769	0.005903	5	0.124647	0.0114185	5			4.15039	0.12694	0.0182938	5	0.0992312	0.00916395	5
	4.21143	0.083656	0.010357	5	0.081066	0.00519676	5			4.21143	0.116303	0.005188	5	0.124923	0.010536	5			4.21143	0.125746	0.0182513	5	0.0982571	0.00875892	5
	4.27246	0.082898	0.010065	5	0.080624	0.00538561	5			4.27246	0.116045	0.004649	5	0.124457	0.00987669	5			4.27246	0.124454	0.018158	5	0.097052	0.00839838	5
	4.3335	0.082685	0.009754	5	0.080191	0.00544239	5			4.3335	0.114915	0.005272	5	0.122834	0.00909742	5			4.3335	0.123066	0.0180722	5	0.095864	0.00818173	5
	4.39453	0.082749	0.00964	5	0.079874	0.00522616	5			4.39453	0.112967	0.006578	5	0.121272	0.00804305	5			4.39453	0.121623	0.017927	5	0.0948641	0.0079859	5
	4.45557	0.082495	0.009605	5	0.079644	0.00493038	5			4.45557	0.111357	0.007089	5	0.120907	0.00725493	5			4.45557	0.120118	0.0176338	5	0.0939324	0.00764482	5
	4.5166	0.081845	0.009443	5	0.079427	0.00482446	5			4.5166	0.110486	0.0064	5	0.121158	0.00721981	5			4.5166	0.118543	0.0172544	5	0.0928643	0.00719055	5
	4.57764	0.081271	0.009182	5	0.079197	0.00489008	5			4.57764	0.109198	0.005523	5	0.120608	0.0070352	5			4.57764	0.116961	0.0169572	5	0.0916891	0.00679835	5
	4.63867	0.081074	0.009004	5	0.078914	0.0049056	5			4.63867	0.106567	0.005771	5	0.11884	0.00576787	5			4.63867	0.115467	0.0167753	5	0.0906283	0.00653346	5
	4.69971	0.080976	0.008928	5	0.078467	0.00475216	5			4.69971	0.103609	0.006652	5	0.116457	0.00412774	5			4.69971	0.114067	0.0165241	5	0.0897577	0.00627815	5
	4.76074	0.080528	0.008781	5	0.077816	0.00453746	5			4.76074	0.10201	0.006982	5	0.113795	0.00367162	5			4.76074	0.112645	0.0160377	5	0.0888961	0.00592315	5
	4.82178	0.079679	0.008436	5	0.077134	0.00440096	5			4.82178	0.101527	0.006728	5	0.110777	0.00452479	5			4.82178	0.111055	0.0154085	5	0.0878976	0.00552369	5
	4.88281	0.078758	0.007994	5	0.076672	0.00435964	5			4.88281	0.100104	0.006245	5	0.107888	0.00489533	5			4.88281	0.109262	0.0148803	5	0.0868906	0.00519095	5
	4.94385	0.078015	0.007602	5	0.076449	0.00436252	5			4.94385	0.096726	0.005966	5	0.10606	0.00439952	5			4.94385	0.107368	0.0145422	5	0.0860769	0.00492882	5
	5.00488	0.0774	0.00725	5	0.076239	0.00438596	5			5.00488	0.09279	0.005884	5	0.105212	0.0043233	5			5.00488	0.10552	0.0142553	5	0.0854096	0.00466801	5
	5.06592	0.076772	0.006834	5	0.075919	0.00448722	5			5.06592	0.090044	0.005522	5	0.103913	0.00491703	5			5.06592	0.103777	0.0139028	5	0.0846708	0.00440191	5
	5.12695	0.076117	0.006401	5	0.075667	0.00460069	5			5.12695	0.088412	0.005067	5	0.101128	0.00508114	5			5.12695	0.102092	0.0135586	5	0.0838271	0.00420467	5
	5.18799	0.075476	0.006151	5	0.075668	0.00456787	5			5.18799	0.086842	0.004896	5	0.0975737	0.00460847	5			5.18799	0.100405	0.0133351	5	0.0830652	0.0040953	5
	5.24902	0.074767	0.006101	5	0.075758	0.00437998	5			5.24902	0.085331	0.005192	5	0.0946666	0.00428997	5			5.24902	0.0987148	0.0131915	5	0.0824271	0.00398783	5
	5.31006	0.073842	0.005983	5	0.075612	0.00418568	5			5.31006	0.084654	0.005605	5	0.0926616	0.00463693	5			5.31006	0.0970465	0.0130245	5	0.0816547	0.00381205	5
	5.37109	0.0727	0.005562	5	0.075238	0.00416014	5			5.37109	0.084546	0.005624	5	0.0907109	0.00465272	5			5.37109	0.0953686	0.0128597	5	0.0805605	0.00363288	5
	5.43213	0.071569	0.004941	5	0.074997	0.00426362	5			5.43213	0.083745	0.005546	5	0.0884458	0.00365946	5			5.43213	0.0936269	0.0127873	5	0.0793751	0.00360079	5
	5.49316	0.070724	0.004441	5	0.075051	0.00424126	5			5.49316	0.081939	0.005867	5	0.0864703	0.00253655	5			5.49316	0.0918562	0.0127694	5	0.0784894	0.00375549	5
	5.5542	0.07027	0.004196	5	0.075048	0.00393874	5			5.5542	0.080244	0.006513	5	0.0851436	0.0025248	5			5.5542	0.0901698	0.0126739	5	0.0779275	0.00397886	5
	5.61523	0.070061	0.004028	5	0.074603	0.00350108	5			5.61523	0.079302	0.006841	5	0.0837591	0.00314576	5			5.61523	0.0885931	0.0124911	5	0.0773196	0.00413711	5
	5.67627	0.069814	0.003755	5	0.073895	0.0032178	5			5.67627	0.078203	0.006479	5	0.0814375	0.00332608	5			5.67627	0.0869877	0.012371	5	0.0764079	0.00419215	5
	5.73731	0.069308	0.003453	5	0.073478	0.00319557	5			5.7373	0.076058	0.005833	5	0.0783187	0.00302335	5			5.7373	0.0852277	0.0124008	5	0.0753416	0.00419648	5
	5.79834	0.068559	0.003281	5	0.073547	0.00330038	5			5.79834	0.073576	0.005353	5	0.0753236	0.00283531	5			5.79834	0.0833959	0.0124756	5	0.0743883	0.00421698	5
	5.85938	0.067799	0.003188	5	0.073701	0.00333423	5			5.85938	0.071981	0.004947	5	0.0730045	0.00275026	5			5.85938	0.081683	0.0124598	5	0.0735587	0.00429574	5
	5.92041	0.067243	0.003026	5	0.073543	0.00325587	5			5.92041	0.071085	0.004321	5	0.0711547	0.00238134	5			5.92041	0.0801095	0.0123672	5	0.0726753	0.00443793	5
	5.98144	0.06686	0.002797	5	0.073225	0.0031817	5			5.98145	0.069705	0.003706	5	0.0694472	0.00202195	5			5.98145	0.0784914	0.0122987	5	0.0716828	0.00460186	5
	6.04248	0.066465	0.00264	5	0.073204	0.00317693	5			6.04248	0.067677	0.003585	5	0.0679299	0.00214165	5			6.04248	0.0767252	0.0122718	5	0.0706978	0.00472829	5
	6.10352	0.06601	0.002631	5	0.07363	0.00322515	5			6.10352	0.066122	0.004048	5	0.0667488	0.00221414	5			6.10352	0.0749646	0.0122127	5	0.0697956	0.00479235	5
	6.16455	0.065674	0.002662	5	0.074225	0.00331955	5			6.16455	0.065628	0.004601	5	0.0657408	0.00200855	5			6.16455	0.0734023	0.012089	5	0.068908	0.00483019	5
	6.22559	0.065586	0.002618	5	0.074683	0.00345682	5			6.22559	0.065318	0.004618	5	0.0645537	0.00152705	5			6.22559	0.0719739	0.0119563	5	0.0679406	0.00489975	5
	6.28662	0.065597	0.002502	5	0.074969	0.0035768	5			6.28662	0.064147	0.004302	5	0.063031	0.0013989	5			6.28662	0.0704336	0.0118721	5	0.0668718	0.0050044	5
	6.34766	0.06546	0.002426	5	0.075197	0.00362255	5			6.34766	0.062221	0.004175	5	0.0613021	0.00174632	5			6.34766	0.0686948	0.0118134	5	0.0657248	0.00508151	5
	6.40869	0.065189	0.002454	5	0.075448	0.00367578	5			6.40869	0.060285	0.004268	5	0.0595731	0.00192619	5			6.40869	0.0669396	0.0117108	5	0.0645449	0.00509122	5
	6.46973	0.065058	0.002539	5	0.075788	0.00387149	5			6.46973	0.058618	0.004234	5	0.0579793	0.00193944	5			6.46973	0.0653586	0.011533	5	0.0634167	0.00507398	5
	6.53076	0.06523	0.002676	5	0.076291	0.00414778	5			6.53076	0.057096	0.003842	5	0.0565946	0.00213573	5			6.53076	0.0639224	0.0113107	5	0.0624051	0.00508759	5
	6.5918	0.065536	0.002782	5	0.076945	0.00439532	5			6.5918	0.055838	0.00329	5	0.0554237	0.00276072	5			6.5918	0.0624876	0.0110915	5	0.0614579	0.0051297	5
	6.65283	0.065715	0.002706	5	0.07761	0.00459695	5			6.65283	0.055031	0.002917	5	0.0543454	0.0031126	5			6.65283	0.0610244	0.0108853	5	0.0604592	0.00515426	5
	6.71387	0.065755	0.002473	5	0.078168	0.00479448	5			6.71387	0.054393	0.002648	5	0.0531737	0.00302487	5			6.71387	0.0596208	0.0106649	5	0.0594017	0.0051416	5
	6.7749	0.065861	0.002297	5	0.078637	0.00499376	5			6.7749	0.053498	0.002114	5	0.0518549	0.00288811	5			6.7749	0.0583089	0.0104052	5	0.0584041	0.00512242	5
	6.83594	0.066152	0.002309	5	0.079095	0.00508663	5			6.83594	0.052526	0.001414	5	0.0505666	0.00288027	5			6.83594	0.0570042	0.0101147	5	0.0575214	0.00512726	5
	6.89697	0.066482	0.002356	5	0.079591	0.00513107	5			6.89697	0.052062	0.00111	5	0.0495663	0.0028838	5			6.89697	0.0556281	0.00982062	5	0.0566543	0.00513916	5
	6.95801	0.066612	0.002266	5	0.080194	0.00535702	5			6.95801	0.052137	0.001391	5	0.0489576	0.00277308	5			6.95801	0.0542043	0.0095283	5	0.0557186	0.00512425	5
	7.01904	0.066485	0.002066	5	0.081017	0.00592842	5			7.01904	0.052045	0.00179	5	0.0486461	0.00272764	5			7.01904	0.0528087	0.00921579	5	0.0547959	0.00507446	5
	7.08008	0.06631	0.001947	5	0.082047	0.00671968	5			7.08008	0.051274	0.001972	5	0.0484901	0.00276773	5			7.08008	0.0514805	0.00887024	5	0.054003	0.00500208	5
	7.14111	0.066379	0.002019	5	0.083038	0.00736537	5			7.14111	0.050136	0.001947	5	0.0483988	0.00263212	5			7.14111	0.0502123	0.00850613	5	0.0532939	0.00492485	5
	7.20215	0.066799	0.002125	5	0.083758	0.00771651	5			7.20215	0.049279	0.002095	5	0.0482643	0.00223344	5			7.20215	0.048985	0.00813234	5	0.052529	0.0048607	5
	7.26318	0.067389	0.002103	5	0.084299	0.00795836	5			7.26318	0.048942	0.002596	5	0.0479104	0.00187176	5			7.26318	0.0477811	0.00773048	5	0.0517015	0.00482051	5
	7.32422	0.067844	0.002061	5	0.084971	0.00825876	5			7.32422	0.048887	0.003041	5	0.0472291	0.00189904	5			7.32422	0.0465894	0.00729338	5	0.0509475	0.00479522	5
	7.38525	0.068026	0.002188	5	0.085858	0.00848784	5			7.38525	0.048747	0.003117	5	0.0463548	0.00215667	5			7.38525	0.0454236	0.00686815	5	0.0503286	0.00476239	5
	7.44629	0.068052	0.002471	5	0.086694	0.00844436	5			7.44629	0.048185	0.002835	5	0.0455996	0.0022284	5			7.44629	0.0443211	0.00652663	5	0.0497467	0.00471236	5
	7.50732	0.068093	0.00271	5	0.087256	0.00817481	5			7.50732	0.047018	0.002451	5	0.0451721	0.00197832	5			7.50732	0.0433078	0.00628444	5	0.0491088	0.00465991	5
	7.56836	0.068185	0.002811	5	0.0877	0.0079698	5			7.56836	0.045543	0.002302	5	0.0450018	0.00180393	5			7.56836	0.0423742	0.00607971	5	0.0484536	0.00461958	5
	7.62939	0.068288	0.002901	5	0.088333	0.00803131	5			7.62939	0.044532	0.002377	5	0.0448511	0.00202093	5			7.62939	0.0414923	0.00584285	5	0.0478537	0.00458424	5
	7.69043	0.068435	0.003151	5	0.089154	0.00823312	5			7.69043	0.044517	0.002417	5	0.0445462	0.00211176	5			7.69043	0.0406342	0.00556288	5	0.0473042	0.00453262	5
	7.75146	0.068685	0.003567	5	0.089825	0.0083431	5			7.75146	0.045119	0.002361	5	0.0440874	0.00175949	5			7.75146	0.0397713	0.0052777	5	0.0467847	0.00446551	5
	7.8125	0.068943	0.004003	5	0.090093	0.00829561	5			7.8125	0.045421	0.002291	5	0.0436076	0.0013844	5			7.8125	0.0388872	0.00502056	5	0.0463347	0.00442181	5
	7.87354	0.06901	0.004371	5	0.090069	0.00819178	5			7.87354	0.045055	0.002438	5	0.0432676	0.00132673	5			7.87354	0.0380082	0.00479645	5	0.0459641	0.00441928	5
	7.93457	0.068854	0.004698	5	0.090038	0.00808626	5			7.93457	0.044577	0.002712	5	0.0431333	0.00172999	5			7.93457	0.0371925	0.00459568	5	0.0455633	0.00442874	5
	7.99561	0.068693	0.005006	5	0.090123	0.0079203	5			7.99561	0.044627	0.002764	5	0.0430984	0.00213597	5			7.99561	0.0364693	0.00440513	5	0.0450263	0.00441505	5
	8.05664	0.068724	0.005275	5	0.090237	0.00768976	5			8.05664	0.045019	0.002654	5	0.0429778	0.002114	5			8.05664	0.0358059	0.00421101	5	0.0444204	0.00437913	5
	8.11768	0.068872	0.005513	5	0.09029	0.00754473	5			8.11768	0.044989	0.002433	5	0.0427339	0.00183732	5			8.11768	0.0351584	0.00401328	5	0.0439073	0.0043576	5
	8.17871	0.068933	0.005759	5	0.090311	0.0075987	5			8.17871	0.044228	0.002315	5	0.0425444	0.00171434	5			8.17871	0.0345283	0.00383855	5	0.0435143	0.00437564	5
	8.23975	0.068875	0.006036	5	0.090358	0.00771317	5			8.23975	0.043279	0.00252	5	0.0425376	0.00205409	5			8.23975	0.0339393	0.0037127	5	0.0431196	0.00442138	5
	8.30078	0.068841	0.00629	5	0.090383	0.00765424	5			8.30078	0.042766	0.002718	5	0.0425028	0.00225343	5			8.30078	0.0333793	0.0036262	5	0.0426725	0.00446753	5
	8.36182	0.068865	0.006422	5	0.090269	0.00739336	5			8.36182	0.042554	0.002609	5	0.0420372	0.00213344	5			8.36182	0.0328058	0.00353704	5	0.0422793	0.00449882	5
	8.42285	0.068778	0.006438	5	0.089974	0.00712107	5			8.42285	0.041997	0.002336	5	0.0410484	0.00212892	5			8.42285	0.0322022	0.00341235	5	0.0420095	0.00451247	5
	8.48389	0.068458	0.006445	5	0.089581	0.00695253	5			8.48389	0.04093	0.002296	5	0.0399766	0.00243948	5			8.48389	0.0315968	0.00326662	5	0.0417488	0.00451099	5
	8.54492	0.068048	0.006544	5	0.08916	0.00678176	5			8.54492	0.039951	0.002236	5	0.039366	0.00268956	5			8.54492	0.0310221	0.00313772	5	0.0413518	0.00449214	5
	8.60596	0.067797	0.006731	5	0.088627	0.00647671	5			8.60596	0.039612	0.002026	5	0.0392535	0.00253253	5			8.60596	0.0304867	0.00304133	5	0.0408565	0.00445485	5
	8.66699	0.067757	0.006921	5	0.087838	0.00612424	5			8.66699	0.03969	0.001775	5	0.0391288	0.00220976	5			8.66699	0.0299846	0.00295892	5	0.0404267	0.00442019	5
	8.72803	0.067746	0.007091	5	0.086833	0.00593665	5			8.72803	0.039604	0.001567	5	0.0385335	0.00215061	5			8.72803	0.0295019	0.00286429	5	0.0401312	0.00442429	5
	8.78906	0.067583	0.007297	5	0.085867	0.00593859	5			8.78906	0.039265	0.001444	5	0.0375681	0.00233846	5			8.78906	0.0290113	0.0027569	5	0.0399003	0.00448292	5
	8.8501	0.067259	0.00754	5	0.085106	0.00595522	5			8.8501	0.03903	0.001442	5	0.036708	0.00230263	5			8.8501	0.0284962	0.00265386	5	0.0396766	0.0045714	5
	8.91113	0.066857	0.007726	5	0.084373	0.00585535	5			8.91113	0.038929	0.001566	5	0.0362094	0.00191644	5			8.91113	0.0279867	0.00256612	5	0.0394783	0.004648	5
	8.97217	0.066413	0.007809	5	0.083342	0.00570129	5			8.97217	0.038507	0.001656	5	0.0358593	0.00160772	5			8.97217	0.0275375	0.00249244	5	0.0392966	0.00469526	5
	9.0332	0.065918	0.007862	5	0.081963	0.0056088	5			9.0332	0.03758	0.001574	5	0.0353196	0.00171813	5			9.0332	0.0271546	0.0024325	5	0.0390558	0.00473526	5
	9.09424	0.065389	0.00797	5	0.08051	0.0055646	5			9.09424	0.036633	0.001174	5	0.0345449	0.00203537	5			9.09424	0.0267835	0.00239721	5	0.0387313	0.00479405	5
	9.15527	0.064857	0.008111	5	0.079201	0.00553564	5			9.15527	0.036111	0.001003	5	0.0337538	0.00220686	5			9.15527	0.0263888	0.0023845	5	0.0384131	0.00486158	5
	9.21631	0.064304	0.008205	5	0.077958	0.00556824	5			9.21631	0.035726	0.000918	5	0.0331106	0.00214331	5			9.21631	0.0260052	0.00236799	5	0.0381815	0.00490359	5
	9.27734	0.063674	0.008267	5	0.076643	0.00568357	5			9.27734	0.034949	0.000642	5	0.032612	0.00201684	5			9.27734	0.0256678	0.00232785	5	0.0379899	0.00490966	5
	9.33838	0.062957	0.008398	5	0.075341	0.00581575	5			9.33838	0.033911	0.000622	5	0.0322441	0.00196607	5			9.33838	0.0253318	0.002276	5	0.0377472	0.00491094	5
	9.39941	0.062217	0.008625	5	0.07421	0.0059166	5			9.39941	0.033239	0.000665	5	0.0320302	0.00199691	5			9.39941	0.024926	0.00224136	5	0.0374603	0.00494254	5
	9.46045	0.061512	0.008841	5	0.073143	0.006027	5			9.46045	0.033067	0.000784	5	0.0318583	0.00201332	5			9.46045	0.0244781	0.00223483	5	0.0372061	0.00500364	5
	9.52148	0.060832	0.00895	5	0.07185	0.00616619	5			9.52148	0.032805	0.000787	5	0.0314611	0.00186427	5			9.52148	0.0241108	0.00223954	5	0.0369994	0.0050667	5
	9.58252	0.06012	0.009007	5	0.070254	0.00625077	5			9.58252	0.032052	0.000811	5	0.0307338	0.00155869	5			9.58252	0.0238855	0.00223403	5	0.0367892	0.00512039	5
	9.64355	0.059309	0.009099	5	0.068584	0.0062063	5			9.64355	0.031205	0.000899	5	0.0299621	0.00124861	5			9.64355	0.0237053	0.00221401	5	0.0365724	0.00517894	5
	9.70459	0.058326	0.009194	5	0.066991	0.00607806	5			9.70459	0.030846	0.001082	5	0.0295403	0.00102805	5			9.70459	0.0234242	0.00218497	5	0.0364037	0.00525025	5
	9.76562	0.057111	0.00919	5	0.065311	0.00597966	5			9.76562	0.030925	0.001254	5	0.0294946	0.000877675	5			9.76562	0.0230225	0.0021525	5	0.0362726	0.00531669	5
	9.82666	0.055725	0.009106	5	0.063358	0.00594564	5			9.82666	0.030925	0.001212	5	0.0294688	0.000802378	5			9.82666	0.0226195	0.00212312	5	0.0360767	0.00535477	5
	9.8877	0.054388	0.009077	5	0.061277	0.00592509	5			9.8877	0.030595	0.001116	5	0.0291914	0.000897432	5			9.8877	0.0223168	0.00210895	5	0.0357725	0.0053715	5
	9.94873	0.053277	0.009141	5	0.059376	0.0059152	5			9.94873	0.030106	0.001264	5	0.028775	0.00107502	5			9.94873	0.0220855	0.00211536	5	0.0354675	0.00540748	5
	10.0098	0.052295	0.009156	5	0.0577	0.00593856	5			10.0098	0.029612	0.001525	5	0.0284901	0.00126271	5			10.0098	0.0218292	0.0021208	5	0.0352803	0.00548256	5
	10.0708	0.051147	0.008991	5	0.056008	0.00595459	5			10.0708	0.029086	0.001599	5	0.0284111	0.00140258	5			10.0708	0.0215122	0.00210404	5	0.0351668	0.00555229	5
	10.1318	0.049728	0.008722	5	0.054181	0.00590132	5			10.1318	0.02859	0.001522	5	0.0284073	0.00142377	5			10.1318	0.0211842	0.00207543	5	0.0349824	0.00555512	5
	10.1929	0.048292	0.008535	5	0.052399	0.00578886	5			10.1929	0.028319	0.001471	5	0.0283741	0.00139758	5			10.1929	0.020897	0.00206426	5	0.0346921	0.00550004	5
	10.2539	0.047141	0.008491	5	0.05083	0.00567071	5			10.2539	0.028254	0.001461	5	0.0283253	0.00140893	5			10.2539	0.020647	0.00208095	5	0.0344093	0.0054708	5
	10.3149	0.046219	0.008477	5	0.049333	0.00552327	5			10.3149	0.028084	0.001386	5	0.0282959	0.00156578	5			10.3149	0.0204059	0.00210261	5	0.0342164	0.00551969	5
	10.376	0.045198	0.008388	5	0.047642	0.00528467	5			10.376	0.027636	0.001265	5	0.0282684	0.00189503	5			10.376	0.020167	0.00210058	5	0.0340503	0.00559411	5
	10.437	0.043922	0.008226	5	0.045747	0.00499295	5			10.437	0.027158	0.001214	5	0.0281973	0.00233547	5			10.437	0.0199323	0.00207395	5	0.0338206	0.0056115	5
	10.498	0.042582	0.008019	5	0.043907	0.0047798	5			10.498	0.026974	0.001211	5	0.0280492	0.00268525	5			10.498	0.0196836	0.00204758	5	0.0335581	0.00558052	5
	10.5591	0.041378	0.007737	5	0.042319	0.0046803	5			10.5591	0.027004	0.001122	5	0.0278422	0.00278046	5			10.5591	0.0194043	0.00203893	5	0.0333597	0.00558943	5
	10.6201	0.04023	0.007359	5	0.040923	0.00455102	5			10.6201	0.026859	0.00094	5	0.0276704	0.00273694	5			10.6201	0.0191247	0.00204491	5	0.0332283	0.00567056	5
	10.6812	0.038937	0.006956	5	0.039559	0.00428549	5			10.6812	0.026358	0.000866	5	0.0276075	0.00271842	5			10.6812	0.0189024	0.00205339	5	0.0330659	0.00574578	5
	10.7422	0.037517	0.00662	5	0.038168	0.00397775	5			10.7422	0.025735	0.001005	5	0.0275431	0.00274499	5			10.7422	0.0187468	0.00205701	5	0.0328238	0.00574417	5
	10.8032	0.036177	0.006334	5	0.036782	0.00378765	5			10.8032	0.025305	0.001173	5	0.0272528	0.00269125	5			10.8032	0.0185944	0.00205041	5	0.0325649	0.00570332	5
	10.8643	0.035002	0.006003	5	0.035418	0.00370458	5			10.8643	0.025084	0.001165	5	0.0267449	0.00250246	5			10.8643	0.0183828	0.00203077	5	0.0323458	0.00569449	5
	10.9253	0.033873	0.00561	5	0.034083	0.0035682	5			10.9253	0.024826	0.000973	5	0.0263874	0.00230386	5			10.9253	0.0181244	0.00200555	5	0.0321187	0.00570445	5
	10.9863	0.032699	0.005256	5	0.03283	0.00332555	5			10.9863	0.024351	0.000806	5	0.0264717	0.00220642	5			10.9863	0.0178796	0.00198962	5	0.0318205	0.00566693	5
	11.0474	0.031562	0.005021	5	0.031726	0.00311647	5			11.0474	0.023756	0.000878	5	0.0267487	0.00219187	5			11.0474	0.0176763	0.00199478	5	0.0315063	0.0055955	5
	11.1084	0.03055	0.004838	5	0.030765	0.00305752	5			11.1084	0.023294	0.001054	5	0.0266897	0.0021494	5			11.1084	0.0174919	0.00201628	5	0.0312987	0.00558956	5
	11.1694	0.029587	0.004587	5	0.029873	0.00305256	5			11.1694	0.0231	0.001155	5	0.0261901	0.00209087	5			11.1694	0.0173062	0.0020373	5	0.0312091	0.00567836	5
	11.2305	0.028564	0.004242	5	0.028997	0.00294702	5			11.2305	0.023052	0.001172	5	0.0256794	0.002147	5			11.2305	0.0171297	0.00204408	5	0.0310996	0.00575529	5
	11.2915	0.027533	0.003879	5	0.028155	0.00276522	5			11.2915	0.022909	0.001137	5	0.0254493	0.0022771	5			11.2915	0.0169717	0.00203567	5	0.0308585	0.00571887	5
	11.3525	0.026635	0.00357	5	0.027381	0.00264976	5			11.3525	0.022545	0.001076	5	0.025252	0.00222528	5			11.3525	0.0168171	0.00201973	5	0.0305422	0.00561266	5
	11.4136	0.025892	0.003312	5	0.026681	0.00263393	5			11.4136	0.022039	0.000976	5	0.0248061	0.00192692	5			11.4136	0.0166527	0.00200257	5	0.0302825	0.00555391	5
	11.4746	0.025185	0.003082	5	0.026035	0.00260097	5			11.4746	0.021558	0.000902	5	0.0243611	0.00163499	5			11.4746	0.0164883	0.00198533	5	0.0300975	0.0055611	5
	11.5356	0.024439	0.002881	5	0.025423	0.00247366	5			11.5356	0.021215	0.000913	5	0.0243417	0.00152372	5			11.5356	0.0163281	0.00196613	5	0.0298812	0.00554779	5
	11.5967	0.023701	0.002688	5	0.024818	0.00233706	5			11.5967	0.021033	0.000916	5	0.0246103	0.00160166	5			11.5967	0.0161501	0.00194396	5	0.0295714	0.00547671	5
	11.6577	0.023033	0.002465	5	0.024188	0.00230256	5			11.6577	0.020977	0.000927	5	0.0245888	0.00169153	5			11.6577	0.015943	0.00192248	5	0.0292404	0.00541803	5
	11.7188	0.022418	0.002218	5	0.023545	0.00233301	5			11.7188	0.020965	0.000991	5	0.0241227	0.00160518	5			11.7188	0.0157427	0.0019115	5	0.0289835	0.00542525	5
	11.7798	0.021821	0.001998	5	0.022954	0.0022972	5			11.7798	0.020887	0.001164	5	0.023722	0.00147189	5			11.7798	0.0155906	0.00191357	5	0.028785	0.00543955	5
	11.8408	0.021255	0.001827	5	0.022468	0.00216918	5			11.8408	0.020689	0.001426	5	0.0237573	0.00138202	5			11.8408	0.0154686	0.00191472	5	0.0285571	0.00538162	5
	11.9019	0.020734	0.001682	5	0.022052	0.00205377	5			11.9019	0.020423	0.00154	5	0.0238656	0.00124269	5			11.9019	0.0153192	0.00189699	5	0.0282755	0.0052785	5
	11.9629	0.020219	0.001546	5	0.021615	0.00202007	5			11.9629	0.020179	0.00141	5	0.0235182	0.00106804	5			11.9629	0.0151321	0.00186137	5	0.0280042	0.0052193	5
	12.0239	0.019684	0.001445	5	0.021114	0.00201465	5			12.0239	0.019974	0.001204	5	0.0228785	0.000933273	5			12.0239	0.0149628	0.00182988	5	0.0277921	0.00521646	5
	12.085	0.019177	0.001396	5	0.020603	0.00194492	5			12.085	0.019739	0.001086	5	0.0226172	0.000905706	5			12.085	0.0148468	0.00181588	5	0.0276111	0.00519416	5
	12.146	0.018755	0.00135	5	0.020156	0.00181733	5			12.146	0.019416	0.00111	5	0.0229646	0.0010092	5			12.146	0.0147388	0.00180569	5	0.0274179	0.0051157	5
	12.207	0.018396	0.001257	5	0.01977	0.00172166	5			12.207	0.019049	0.001206	5	0.0234117	0.00117596	5			12.207	0.0145755	0.00177892	5	0.0272219	0.00504369	5
	12.2681	0.018028	0.001146	5	0.019393	0.00169952	5			12.2681	0.018753	0.001284	5	0.023437	0.00132519	5			12.2681	0.0143699	0.00173877	5	0.0270544	0.00504	5
	12.3291	0.017635	0.001088	5	0.019017	0.00170172	5			12.3291	0.018621	0.001362	5	0.0231424	0.00142053	5			12.3291	0.0141952	0.00170843	5	0.026904	0.00506647	5
	12.3901	0.017262	0.00109	5	0.0187	0.00166616	5			12.3901	0.018641	0.001372	5	0.022969	0.00147233	5			12.3901	0.0140822	0.0016964	5	0.0267244	0.00503718	5
	12.4512	0.016928	0.001091	5	0.018468	0.00159329	5			12.4512	0.018699	0.001326	5	0.0230715	0.00150898	5			12.4512	0.0139802	0.00168282	5	0.0264923	0.00493601	5
	12.5122	0.016609	0.00106	5	0.018248	0.0015216	5			12.5122	0.018675	0.001322	5	0.0232518	0.00151174	5			12.5122	0.0138308	0.0016484	5	0.0262232	0.00482555	5
	12.5732	0.0163	0.001021	5	0.017938	0.00146838	5			12.5732	0.018523	0.001355	5	0.0233559	0.00148774	5			12.5732	0.0136418	0.00160141	5	0.0259389	0.00475274	5
	12.6343	0.016039	0.001004	5	0.017552	0.00141972	5			12.6343	0.018267	0.001372	5	0.0234304	0.00148352	5			12.6343	0.0134647	0.00156427	5	0.0256508	0.00470141	5
	12.6953	0.015838	0.001005	5	0.017214	0.00137023	5			12.6953	0.017936	0.001337	5	0.0235034	0.00143583	5			12.6953	0.013323	0.00154387	5	0.0253739	0.00464332	5
	12.7563	0.015647	0.001004	5	0.017007	0.00133501	5			12.7563	0.017565	0.001284	5	0.023463	0.00132071	5			12.7563	0.0131955	0.00152996	5	0.0251286	0.00458871	5
	12.8174	0.015419	0.001003	5	0.016865	0.00131644	5			12.8174	0.017229	0.001295	5	0.023229	0.0012536	5			12.8174	0.0130581	0.00151664	5	0.0249242	0.00455979	5
	12.8784	0.015177	0.001016	5	0.016651	0.00129761	5			12.8784	0.017021	0.001367	5	0.0228977	0.00126249	5			12.8784	0.012913	0.00150856	5	0.0247595	0.00454418	5
	12.9395	0.014966	0.001026	5	0.016336	0.00126529	5			12.9395	0.016943	0.001363	5	0.022631	0.00127317	5			12.9395	0.0127733	0.00150599	5	0.024633	0.00450982	5
	13.0005	0.014785	0.001009	5	0.016018	0.00123159	5			13.0005	0.016893	0.001236	5	0.0224863	0.0012731	5			13.0005	0.0126438	0.00149996	5	0.0245267	0.00445254	5
	13.0615	0.014601	0.00098	5	0.015796	0.00121745	5			13.0615	0.016802	0.00107	5	0.0224113	0.00130846	5			13.0615	0.0125242	0.00148874	5	0.0243873	0.00439643	5
	13.1226	0.014406	0.000975	5	0.015647	0.00121733	5			13.1226	0.01671	0.000991	5	0.0223353	0.00141461	5			13.1226	0.0124134	0.00148157	5	0.0241659	0.00435413	5
	13.1836	0.01421	0.000992	5	0.015476	0.00121738	5			13.1836	0.016674	0.001032	5	0.0222132	0.00154712	5			13.1836	0.0122997	0.00148216	5	0.0238854	0.00430901	5
	13.2446	0.014	0.000996	5	0.015239	0.00121717	5			13.2446	0.016656	0.001063	5	0.0220333	0.00160959	5			13.2446	0.0121628	0.00147953	5	0.0236283	0.004243	5
	13.3057	0.013751	0.000978	5	0.014979	0.00122173	5			13.3057	0.016591	0.001073	5	0.0218416	0.0016039	5			13.3057	0.0119998	0.00146247	5	0.0234367	0.00416771	5
	13.3667	0.013486	0.000966	5	0.014762	0.00122748	5			13.3667	0.016496	0.001191	5	0.0217282	0.0016434	5			13.3667	0.0118403	0.00143803	5	0.0232633	0.00410952	5
	13.4277	0.013277	0.000988	5	0.014601	0.00122311	5			13.4277	0.016411	0.001379	5	0.0217329	0.00179496	5			13.4277	0.0117154	0.00142205	5	0.0230503	0.00407507	5
	13.4888	0.013152	0.001036	5	0.014465	0.00121026	5			13.4888	0.016291	0.001445	5	0.0217781	0.00197091	5			13.4888	0.0116169	0.0014174	5	0.0228196	0.00404437	5
	13.5498	0.01305	0.001068	5	0.014332	0.00120157	5			13.5498	0.016073	0.001353	5	0.0217346	0.00201621	5			13.5498	0.0115064	0.0014121	5	0.0226337	0.00399562	5
	13.6108	0.0129	0.001054	5	0.014203	0.00119856	5			13.6108	0.015821	0.00128	5	0.0215636	0.00189012	5			13.6108	0.0113659	0.00139884	5	0.0224916	0.00392721	5
	13.6719	0.012706	0.001015	5	0.014084	0.00118856	5			13.6719	0.015652	0.001278	5	0.0213706	0.00171492	5			13.6719	0.0112188	0.00138179	5	0.0223262	0.00385203	5
	13.7329	0.012527	0.000995	5	0.013963	0.00117197	5			13.7329	0.015526	0.001252	5	0.0212961	0.00166539	5			13.7329	0.0110909	0.00136602	5	0.022106	0.00378004	5
	13.794	0.012388	0.001015	5	0.013823	0.00116674	5			13.7939	0.0153	0.001117	5	0.0213439	0.00177875	5			13.7939	0.0109705	0.0013516	5	0.0218788	0.00371354	5
	13.855	0.012258	0.001051	5	0.013668	0.00117816	5			13.855	0.015013	0.001015	5	0.0213458	0.00190574	5			13.855	0.010829	0.00133757	5	0.0216941	0.00365473	5
	13.916	0.01211	0.001063	5	0.013527	0.00118397	5			13.916	0.014932	0.001191	5	0.0211522	0.00195302	5			13.916	0.0106683	0.00132549	5	0.0215349	0.00360812	5
	13.9771	0.011958	0.001042	5	0.01342	0.00116164	5			13.9771	0.015175	0.00155	5	0.020851	0.00199802	5			13.9771	0.010521	0.00131282	5	0.0213617	0.00357153	5
	14.0381	0.011819	0.001017	5	0.013327	0.00112216	5			14.0381	0.015456	0.001752	5	0.0206897	0.0021268	5			14.0381	0.0104031	0.00129169	5	0.0211798	0.00353206	5
	14.0991	0.011682	0.001014	5	0.01321	0.00109749	5			14.0991	0.015423	0.001654	5	0.0207202	0.00229138	5			14.0991	0.0102925	0.00125971	5	0.0210171	0.0034771	5
	14.1602	0.011536	0.001026	5	0.013065	0.00110231	5			14.1602	0.01514	0.001538	5	0.020661	0.00240997	5			14.1602	0.0101641	0.00122839	5	0.0208605	0.00340823	5
	14.2212	0.011397	0.001032	5	0.012932	0.00111395	5			14.2212	0.014999	0.001673	5	0.0202867	0.00244379	5			14.2212	0.010027	0.00121015	5	0.0206737	0.00333969	5
	14.2822	0.011283	0.001025	5	0.012848	0.00111173	5			14.2822	0.015152	0.001944	5	0.0198611	0.00241087	5			14.2822	0.0099068	0.00120226	5	0.0204673	0.00328301	5
	14.3433	0.011179	0.001015	5	0.012793	0.00110437	5			14.3433	0.015309	0.002042	5	0.0198949	0.00240403	5			14.3433	0.0098056	0.00119241	5	0.0202971	0.00323667	5
	14.4043	0.011052	0.000996	5	0.012714	0.00110262	5			14.4043	0.015175	0.001927	5	0.0204223	0.00242325	5			14.4043	0.00970126	0.00117394	5	0.0201813	0.00319326	5
	14.4653	0.010904	0.000957	5	0.012592	0.00110272	5			14.4653	0.014876	0.001895	5	0.0208366	0.00237222	5			14.4653	0.00958134	0.00115032	5	0.0200686	0.00315133	5
	14.5264	0.010774	0.000907	5	0.012453	0.00109418	5			14.5264	0.014749	0.002081	5	0.0206541	0.00224267	5			14.5264	0.00945699	0.00112477	5	0.0199117	0.00311128	5
	14.5874	0.01069	0.000875	5	0.012327	0.00108227	5			14.5874	0.014836	0.00225	5	0.0201814	0.00214955	5			14.5874	0.00934199	0.00109537	5	0.0197339	0.00306799	5
	14.6484	0.010636	0.000876	5	0.012214	0.00107479	5			14.6484	0.014824	0.002146	5	0.020072	0.00224563	5			14.6484	0.0092368	0.0010635	5	0.0195916	0.00301537	5
	14.7095	0.010582	0.000891	5	0.012109	0.00105937	5			14.7095	0.014508	0.001845	5	0.0203658	0.00243691	5			14.7095	0.00913847	0.00103825	5	0.0194958	0.00295925	5
	14.7705	0.010522	0.000895	5	0.012017	0.00102189	5			14.7705	0.014092	0.00163	5	0.0204408	0.00246698	5			14.7705	0.00904934	0.00102634	5	0.0194059	0.00291629	5
	14.8315	0.010455	0.000885	5	0.011937	0.000969623	5			14.8315	0.013927	0.001603	5	0.0199867	0.00228344	5			14.8315	0.00896665	0.00102131	5	0.0192876	0.00289197	5
	14.8926	0.010364	0.00088	5	0.011844	0.000934843	5			14.8926	0.014072	0.001658	5	0.0195403	0.00210346	5			14.8926	0.00887737	0.00100983	5	0.0191439	0.0028705	5
	14.9536	0.010235	0.00088	5	0.011728	0.000935879	5			14.9536	0.014263	0.001716	5	0.0197328	0.00215945	5			14.9536	0.00877598	0.000988108	5	0.0189937	0.00283344	5
	15.0146	0.010095	0.000868	5	0.011623	0.000952045	5			15.0146	0.014289	0.001764	5	0.0203342	0.0023495	5			15.0146	0.00867771	0.000966529	5	0.0188499	0.00278427	5
	15.0757	0.010002	0.000843	5	0.011565	0.000956875	5			15.0757	0.014224	0.001759	5	0.0205207	0.00241677	5			15.0757	0.00860092	0.000956322	5	0.0187204	0.00274237	5
	15.1367	0.00998	0.000823	5	0.011539	0.000945555	5			15.1367	0.014229	0.001661	5	0.019998	0.00232628	5			15.1367	0.00854217	0.000955905	5	0.0186034	0.00271578	5
	15.1977	0.009987	0.00082	5	0.011497	0.000932525	5			15.1978	0.014264	0.001544	5	0.0193727	0.00229145	5			15.1978	0.0084815	0.00095349	5	0.0184783	0.00269092	5
	15.2588	0.009954	0.000823	5	0.011431	0.000936126	5			15.2588	0.014143	0.001525	5	0.0192971	0.00243519	5			15.2588	0.00840821	0.000940917	5	0.018323	0.00265058	5
	15.3198	0.009863	0.00082	5	0.011381	0.000955173	5			15.3198	0.013849	0.001528	5	0.0196536	0.00259331	5			15.3198	0.0083275	0.000921241	5	0.0181491	0.00259681	5
	15.3809	0.009755	0.000818	5	0.011369	0.000964183	5			15.3809	0.013609	0.001428	5	0.0198606	0.00257475	5			15.3809	0.00824393	0.000902053	5	0.0179964	0.00254411	5
	15.4419	0.009679	0.000823	5	0.011358	0.000954509	5			15.4419	0.013602	0.001258	5	0.0197075	0.00242043	5			15.4419	0.00815441	0.000885559	5	0.0178824	0.0024963	5
	15.5029	0.009638	0.000824	5	0.011307	0.000939306	5			15.5029	0.013713	0.001156	5	0.0195027	0.00235985	5			15.5029	0.00806116	0.000868898	5	0.0177775	0.00244571	5
	15.564	0.0096	0.000802	5	0.011225	0.000931908	5			15.564	0.013692	0.001227	5	0.0194787	0.00247391	5			15.564	0.00797713	0.000851636	5	0.0176456	0.00239127	5
	15.625	0.009539	0.000768	5	0.011155	0.00093729	5			15.625	0.013481	0.001333	5	0.01945	0.00263299	5			15.625	0.0079105	0.000836633	5	0.0174915	0.00234468	5
	15.686	0.009461	0.000755	5	0.011114	0.000939447	5			15.686	0.013233	0.001329	5	0.0191777	0.00265684	5			15.686	0.00785265	0.000824715	5	0.0173472	0.00231421	5
	15.7471	0.009387	0.000768	5	0.011079	0.000929636	5			15.7471	0.01304	0.001224	5	0.0187818	0.00253068	5			15.7471	0.0077896	0.000813227	5	0.0172233	0.00229179	5
	15.8081	0.009326	0.000781	5	0.011032	0.000918167	5			15.8081	0.012825	0.001153	5	0.0185613	0.00242308	5			15.8081	0.00771793	0.000800836	5	0.0171025	0.00226517	5
	15.8691	0.009269	0.000766	5	0.010973	0.00091453	5			15.8691	0.012526	0.001132	5	0.018543	0.00241905	5			15.8691	0.00764184	0.000791767	5	0.0169752	0.00223334	5
	15.9302	0.009203	0.000735	5	0.010904	0.000913996	5			15.9302	0.012247	0.001069	5	0.0184643	0.00246711	5			15.9302	0.00756153	0.000789904	5	0.0168547	0.00220367	5
	15.9912	0.009128	0.000713	5	0.010821	0.000902578	5			15.9912	0.0121	0.001035	5	0.0181939	0.0024563	5			15.9912	0.00747547	0.000791164	5	0.0167481	0.00217871	5
	16.0523	0.009054	0.000697	5	0.010732	0.000883247	5			16.0522	0.012038	0.001079	5	0.0179381	0.0024259	5			16.0522	0.00739015	0.000786514	5	0.0166362	0.00215238	5
	16.1133	0.008983	0.000666	5	0.010664	0.000875076	5			16.1133	0.01195	0.001152	5	0.017931	0.00250966	5			16.1133	0.00731594	0.000773544	5	0.0164996	0.00212071	5
	16.1743	0.008915	0.000621	5	0.010629	0.000891186	5			16.1743	0.011855	0.0012	5	0.018072	0.00272522	5			16.1743	0.00725291	0.000759867	5	0.0163524	0.00208715	5
	16.2354	0.008858	0.00059	5	0.010605	0.000922366	5			16.2354	0.011844	0.00118	5	0.0180381	0.00292656	5			16.2354	0.00719013	0.000751313	5	0.0162291	0.00205475	5
	16.2964	0.008833	0.000588	5	0.010557	0.000944304	5			16.2964	0.011859	0.001145	5	0.0177076	0.00290378	5			16.2964	0.00712054	0.000744426	5	0.016141	0.00202206	5
	16.3574	0.008847	0.0006	5	0.010479	0.000943964	5			16.3574	0.011726	0.001192	5	0.0173037	0.00272475	5			16.3574	0.00704768	0.000732537	5	0.0160624	0.00199075	5
	16.4185	0.008866	0.000608	5	0.010392	0.000929547	5			16.4185	0.011417	0.001304	5	0.0170774	0.00262927	5			16.4185	0.00697536	0.000716943	5	0.0159689	0.00196664	5
	16.4795	0.008841	0.000611	5	0.010313	0.000909964	5			16.4795	0.011151	0.00136	5	0.0169866	0.00268019	5			16.4795	0.00689996	0.000706046	5	0.0158721	0.00194901	5
	16.5405	0.008758	0.000612	5	0.010235	0.000882645	5			16.5405	0.011119	0.001295	5	0.0167978	0.00275122	5			16.5405	0.00681926	0.000701691	5	0.0158028	0.00193035	5
	16.6016	0.008663	0.000609	5	0.01015	0.000849592	5			16.6016	0.011228	0.001213	5	0.0164341	0.00269423	5			16.6016	0.00674155	0.000695518	5	0.0157633	0.00190797	5
	16.6626	0.008612	0.000599	5	0.01006	0.000825017	5			16.6626	0.011223	0.001206	5	0.0160776	0.00256267	5			16.6626	0.00667761	0.000681233	5	0.0157153	0.00189129	5
	16.7236	0.008613	0.00059	5	0.009977	0.000820853	5			16.7236	0.011017	0.00124	5	0.015911	0.00252132	5			16.7236	0.00662648	0.000665385	5	0.0156263	0.00189186	5
	16.7847	0.00862	0.000588	5	0.00991	0.000827407	5			16.7847	0.010778	0.001266	5	0.0158871	0.00261731	5			16.7847	0.00657715	0.000660151	5	0.0155146	0.00190515	5
	16.8457	0.008593	0.000585	5	0.009858	0.000822975	5			16.8457	0.010687	0.001268	5	0.0158316	0.00272025	5			16.8457	0.00652268	0.000666791	5	0.0154252	0.00191318	5
	16.9067	0.008543	0.000569	5	0.009814	0.000802424	5			16.9067	0.010726	0.001274	5	0.015701	0.0027088	5			16.9067	0.00646539	0.000672955	5	0.0153659	0.00190302	5
	16.9678	0.008508	0.000547	5	0.009781	0.000783832	5			16.9678	0.010749	0.001301	5	0.0156219	0.00267052	5			16.9678	0.00640841	0.000668617	5	0.0152945	0.00187683	5
	17.0288	0.008501	0.000538	5	0.009765	0.000784772	5			17.0288	0.010686	0.001328	5	0.015676	0.00275697	5			17.0288	0.00635124	0.000658795	5	0.015184	0.00184403	5
	17.0898	0.008496	0.000543	5	0.009762	0.000800393	5			17.0898	0.010606	0.001325	5	0.0157526	0.00296998	5			17.0898	0.00629632	0.000655193	5	0.0150703	0.00180913	5
	17.1509	0.008463	0.000543	5	0.009745	0.000814095	5			17.1509	0.010589	0.001288	5	0.0156797	0.00312723	5			17.1509	0.00625166	0.000658898	5	0.0150052	0.00177359	5
	17.2119	0.008407	0.000525	5	0.009685	0.000816577	5			17.2119	0.010615	0.001235	5	0.0154502	0.00311739	5			17.2119	0.00621964	0.000658617	5	0.0149742	0.00174073	5
	17.273	0.008359	0.000503	5	0.009589	0.000808533	5			17.2729	0.010615	0.001196	5	0.0152328	0.0030503	5			17.2729	0.00618792	0.000646451	5	0.0149075	0.00171449	5
	17.334	0.00833	0.000494	5	0.009504	0.000791676	5			17.334	0.010566	0.0012	5	0.0151462	0.00305001	5			17.334	0.00614058	0.000629022	5	0.014778	0.00169584	5
	17.395	0.0083	0.000492	5	0.009463	0.000767776	5			17.395	0.010492	0.001242	5	0.015099	0.00307939	5			17.395	0.00607805	0.000618371	5	0.0146441	0.00168028	5
	17.4561	0.008246	0.000483	5	0.00945	0.000747631	5			17.4561	0.010383	0.001269	5	0.0149178	0.0030131	5			17.4561	0.00601832	0.000615794	5	0.0145652	0.00166073	5
	17.5171	0.008173	0.000467	5	0.009425	0.000746427	5			17.5171	0.010208	0.001242	5	0.0146013	0.00284146	5			17.5171	0.0059754	0.000611933	5	0.014514	0.00163451	5
	17.5781	0.008105	0.000456	5	0.009382	0.000766073	5			17.5781	0.010015	0.001181	5	0.0143522	0.00270517	5			17.5781	0.0059425	0.000602186	5	0.0144179	0.00160714	5
	17.6392	0.00805	0.000454	5	0.009347	0.000787181	5			17.6392	0.009938	0.001153	5	0.0143236	0.00271188	5			17.6392	0.00590148	0.000593938	5	0.0142689	0.00158807	5
	17.7002	0.007999	0.000453	5	0.009326	0.000789322	5			17.7002	0.010042	0.001182	5	0.0144181	0.00278672	5			17.7002	0.00584535	0.000594151	5	0.0141353	0.00158103	5
	17.7612	0.007944	0.000449	5	0.00929	0.000772761	5			17.7612	0.010193	0.001214	5	0.0144202	0.00277516	5			17.7612	0.00578522	0.000597444	5	0.0140592	0.00157587	5
	17.8223	0.0079	0.000446	5	0.009224	0.000755847	5			17.8223	0.010198	0.001201	5	0.0142838	0.00266914	5			17.8223	0.00573516	0.000593261	5	0.014	0.00155675	5
	17.8833	0.007875	0.000445	5	0.009155	0.000754827	5			17.8833	0.010032	0.001162	5	0.0141675	0.00259474	5			17.8833	0.00569547	0.000581556	5	0.0139051	0.00152148	5
	17.9443	0.007856	0.000444	5	0.009118	0.000763588	5			17.9443	0.009837	0.001156	5	0.0141789	0.00263303	5			17.9443	0.00565395	0.000573231	5	0.0137925	0.00148266	5
	18.0054	0.007819	0.000443	5	0.0091	0.000765038	5			18.0054	0.009709	0.001192	5	0.0142125	0.00271078	5			18.0054	0.00560068	0.000573459	5	0.0137159	0.00145014	5
	18.0664	0.007766	0.000442	5	0.009062	0.000752984	5			18.0664	0.009602	0.001215	5	0.0141162	0.00270571	5			18.0664	0.00553845	0.000573807	5	0.0136745	0.00142002	5
	18.1274	0.007719	0.000437	5	0.008998	0.000734361	5			18.1274	0.009466	0.001192	5	0.0139186	0.00262642	5			18.1274	0.00547887	0.000564583	5	0.0136137	0.00138338	5
	18.1885	0.007686	0.000427	5	0.008938	0.000714537	5			18.1885	0.00936	0.001158	5	0.0137727	0.00255982	5			18.1885	0.00543082	0.000549031	5	0.0135111	0.00134148	5
	18.2495	0.007649	0.000421	5	0.008891	0.000689334	5			18.2495	0.009339	0.001166	5	0.0137155	0.00253661	5			18.2495	0.00539371	0.000539344	5	0.01341	0.00130523	5
	18.3105	0.007599	0.000429	5	0.008833	0.00065872	5			18.3105	0.009335	0.001218	5	0.0136162	0.00251308	5			18.3105	0.00536018	0.000539254	5	0.0133494	0.00128294	5
	18.3716	0.007554	0.000449	5	0.008751	0.000634354	5			18.3716	0.009254	0.001266	5	0.0133784	0.00244856	5			18.3716	0.00532331	0.000538686	5	0.0133038	0.00127474	5
	18.4326	0.00753	0.000457	5	0.008676	0.000627931	5			18.4326	0.009133	0.001304	5	0.0130825	0.0023752	5			18.4326	0.005281	0.000528629	5	0.0132242	0.00127748	5
	18.4936	0.007512	0.000443	5	0.008642	0.000632542	5			18.4937	0.009061	0.001346	5	0.012879	0.00233766	5			18.4937	0.00523542	0.000513956	5	0.0131104	0.00128689	5
	18.5547	0.00748	0.000426	5	0.008631	0.000628176	5			18.5547	0.009008	0.001374	5	0.0128125	0.00232101	5			18.5547	0.00519041	0.000507486	5	0.0130076	0.00129283	5
	18.6157	0.00745	0.000426	5	0.008601	0.000609396	5			18.6157	0.008875	0.001367	5	0.0128121	0.00226953	5			18.6157	0.00514896	0.000512967	5	0.0129413	0.00128385	5
	18.6768	0.007456	0.00044	5	0.008548	0.00059607	5			18.6768	0.008705	0.001335	5	0.0128062	0.00218758	5			18.6768	0.00511071	0.000520176	5	0.0128907	0.00126071	5
	18.7378	0.007493	0.000448	5	0.008511	0.000608178	5			18.7378	0.008665	0.001336	5	0.0127828	0.00216579	5			18.7378	0.00507116	0.000519334	5	0.0128272	0.00123623	5
	18.7988	0.007515	0.000447	5	0.008498	0.000635741	5			18.7988	0.008785	0.001397	5	0.0127514	0.00227343	5			18.7988	0.00502539	0.000512923	5	0.0127513	0.00121709	5
	18.8599	0.007497	0.000445	5	0.008464	0.000650497	5			18.8599	0.008867	0.00145	5	0.0126997	0.002459	5			18.8599	0.00497433	0.000509949	5	0.0126817	0.00119464	5
	18.9209	0.007473	0.000449	5	0.008384	0.000639859	5			18.9209	0.008751	0.001416	5	0.0126057	0.00256771	5			18.9209	0.00492528	0.000511626	5	0.0126288	0.00116088	5
	18.9819	0.007479	0.000449	5	0.008299	0.000618416	5			18.9819	0.008549	0.001311	5	0.0124867	0.0025407	5			18.9819	0.00488386	0.000510287	5	0.01259	0.00112474	5
	19.043	0.007497	0.000441	5	0.00826	0.000604545	5			19.043	0.008477	0.001237	5	0.0124253	0.00250143	5			19.043	0.00484708	0.000502275	5	0.0125576	0.0011054	5
	19.104	0.00748	0.000432	5	0.008255	0.000598653	5			19.104	0.008555	0.001248	5	0.0125154	0.00258215	5			19.104	0.00480757	0.000493639	5	0.0125219	0.00110778	5
	19.165	0.00743	0.000431	5	0.008225	0.000593059	5			19.165	0.00861	0.001289	5	0.0127452	0.00276591	5			19.165	0.00476347	0.000491503	5	0.0124767	0.00111124	5
	19.2261	0.00739	0.000431	5	0.008151	0.000586448	5			19.2261	0.008561	0.0013	5	0.0129606	0.0029129	5			19.2261	0.00471986	0.000493514	5	0.012428	0.00109697	5
	19.2871	0.007379	0.000419	5	0.008079	0.000581553	5			19.2871	0.008514	0.001294	5	0.0130074	0.00293412	5			19.2871	0.00468062	0.000491409	5	0.0123883	0.00106987	5
	19.3481	0.007365	0.000403	5	0.008047	0.00057909	5			19.3481	0.008547	0.001314	5	0.012896	0.00289039	5			19.3481	0.00464372	0.000483764	5	0.0123568	0.00104614	5
	19.4092	0.007322	0.0004	5	0.008031	0.000576233	5			19.4092	0.008563	0.001341	5	0.0127472	0.00286594	5			19.4092	0.00460635	0.000477629	5	0.0123172	0.00103537	5
	19.4702	0.007278	0.000412	5	0.007993	0.000573739	5			19.4702	0.008448	0.001332	5	0.0125889	0.00285853	5			19.4702	0.00456944	0.000476991	5	0.012262	0.00103508	5
	19.5312	0.007268	0.000422	5	0.007941	0.000576479	5			19.5312	0.008274	0.001287	5	0.0123423	0.00281608	5			19.5312	0.00453374	0.000476984	5	0.0122058	0.00103985	5
	19.5923	0.007277	0.000419	5	0.007913	0.000584201	5			19.5923	0.008232	0.001271	5	0.0120399	0.00274029	5			19.5923	0.00449566	0.000471889	5	0.0121613	0.00104677	5
	19.6533	0.007253	0.000413	5	0.007904	0.000591839	5			19.6533	0.008373	0.001335	5	0.0118861	0.00268228	5			19.6533	0.00445224	0.000463934	5	0.0121177	0.00104971	5
	19.7144	0.00719	0.000414	5	0.007872	0.000594443	5			19.7144	0.008536	0.001447	5	0.0119707	0.00263348	5			19.7144	0.00440789	0.000460301	5	0.0120623	0.00104057	5
	19.7754	0.007133	0.000426	5	0.007799	0.000588159	5			19.7754	0.008541	0.001544	5	0.0120618	0.00254959	5			19.7754	0.00437035	0.000461755	5	0.012011	0.00102052	5
	19.8364	0.007119	0.000443	5	0.007728	0.000567768	5			19.8364	0.00839	0.001578	5	0.0118868	0.00244093	5			19.8364	0.0043404	0.000460814	5	0.0119908	0.00100284	5
	19.8975	0.00713	0.000461	5	0.007702	0.000536151	5			19.8975	0.008237	0.001554	5	0.011543	0.00239704	5			19.8975	0.00431092	0.000452767	5	0.0119923	0.000998364	5
	19.9585	0.007122	0.000473	5	0.007701	0.000512032	5			19.9585	0.0082	0.001521	5	0.0113847	0.00244869	5			19.9585	0.00427624	0.000441526	5	0.0119708	0.00100085	5
	20.0195	0.007082	0.00047	5	0.007677	0.000511571	5			20.0195	0.008239	0.001511	5	0.011495	0.00249685	5			20.0195	0.00423773	0.000433225	5	0.0119059	0.00099491	5
	20.0806	0.007032	0.00046	5	0.007614	0.000523132	5			20.0806	0.008238	0.001521	5	0.0115406	0.00243355	5			20.0806	0.00419939	0.000428284	5	0.0118347	0.00097848	5
	20.1416	0.006984	0.000453	5	0.00755	0.000515002	5			20.1416	0.008151	0.001523	5	0.0112666	0.00227729	5			20.1416	0.00416315	0.000423038	5	0.0118043	0.000967062	5
	20.2026	0.006936	0.00045	5	0.007511	0.00047931	5			20.2026	0.008037	0.001503	5	0.010895	0.00218763	5			20.2026	0.00412995	0.000416728	5	0.0118071	0.000972991	5
	20.2637	0.006886	0.000446	5	0.007491	0.000447636	5			20.2637	0.007972	0.001481	5	0.0108099	0.00225774	5			20.2637	0.0041005	0.00041196	5	0.0117905	0.000988272	5
	20.3247	0.006845	0.000438	5	0.007465	0.000450561	5			20.3247	0.007953	0.001501	5	0.0109985	0.00239038	5			20.3247	0.00407263	0.000409366	5	0.0117254	0.000995189	5
	20.3857	0.006822	0.000432	5	0.007424	0.000474933	5			20.3857	0.007927	0.00157	5	0.0110828	0.00241978	5			20.3857	0.00404256	0.000406046	5	0.0116376	0.000989385	5
	20.4468	0.006807	0.000434	5	0.007367	0.000481136	5			20.4468	0.007865	0.001621	5	0.0108759	0.00231114	5			20.4468	0.00401189	0.000399864	5	0.0115669	0.00098231	5
	20.5078	0.006786	0.000441	5	0.007295	0.000460701	5			20.5078	0.007788	0.001582	5	0.0106235	0.00219378	5			20.5078	0.0039877	0.000392506	5	0.0115196	0.000982317	5
	20.5689	0.006764	0.000447	5	0.007225	0.000445974	5			20.5688	0.007719	0.001478	5	0.0106083	0.00217478	5			20.5688	0.00397106	0.000386406	5	0.0114753	0.00098421	5
	20.6299	0.006753	0.000449	5	0.007193	0.000461647	5			20.6299	0.007655	0.001401	5	0.0107508	0.00222778	5			20.6299	0.00395113	0.000381242	5	0.0114234	0.000981056	5
	20.6909	0.006755	0.000442	5	0.007207	0.000490899	5			20.6909	0.00759	0.001393	5	0.0107774	0.00228066	5			20.6909	0.00391788	0.000375921	5	0.011371	0.000976747	5
	20.752	0.006744	0.00043	5	0.007225	0.000499879	5			20.752	0.007529	0.001402	5	0.0106456	0.002315	5			20.752	0.00387737	0.000370482	5	0.0113228	0.000978644	5
	20.813	0.006701	0.000418	5	0.0072	0.000482897	5			20.813	0.007479	0.001361	5	0.0105763	0.00234606	5			20.813	0.00384517	0.000365208	5	0.0112714	0.000981538	5
	20.874	0.006638	0.000415	5	0.007139	0.000462972	5			20.874	0.007436	0.001292	5	0.0106906	0.00236633	5			20.874	0.00382565	0.000360112	5	0.0112111	0.000971825	5
	20.9351	0.00659	0.000417	5	0.007092	0.000457966	5			20.9351	0.007396	0.001248	5	0.0108298	0.00235841	5			20.9351	0.0038076	0.000354721	5	0.0111466	0.000948092	5
	20.9961	0.006573	0.000418	5	0.007081	0.000467315	5			20.9961	0.007354	0.001203	5	0.0108144	0.00235785	5			20.9961	0.00378219	0.000349644	5	0.011084	0.000924979	5
	21.0571	0.006567	0.00041	5	0.007073	0.00048282	5			21.0571	0.007293	0.001094	5	0.0107227	0.0024374	5			21.0571	0.00375473	0.000346765	5	0.0110212	0.000914666	5
	21.1182	0.006541	0.000397	5	0.007041	0.000500953	5			21.1182	0.007203	0.000951	5	0.0107626	0.00259759	5			21.1182	0.00373284	0.000345488	5	0.0109551	0.000911784	5
	21.1792	0.006493	0.000388	5	0.007002	0.000521101	5			21.1792	0.007117	0.000873	5	0.010939	0.00273373	5			21.1792	0.00371202	0.000342526	5	0.0108907	0.000903355	5
	21.2402	0.006449	0.000389	5	0.006989	0.000537274	5			21.2402	0.007077	0.000877	5	0.0110347	0.00273671	5			21.2402	0.00368278	0.000337041	5	0.0108364	0.000889102	5
	21.3013	0.006422	0.0004	5	0.006984	0.000543249	5			21.3013	0.007067	0.00091	5	0.0109436	0.00263168	5			21.3013	0.00364749	0.000332439	5	0.010794	0.000881719	5
	21.3623	0.006401	0.000411	5	0.006941	0.000540847	5			21.3623	0.007007	0.000885	5	0.0108464	0.0025655	5			21.3623	0.00361874	0.000331583	5	0.010759	0.000886694	5
	21.4233	0.006368	0.000414	5	0.00686	0.000537379	5			21.4233	0.006869	0.000792	5	0.0109342	0.00262969	5			21.4233	0.00360086	0.000332367	5	0.0107272	0.000892571	5
	21.4844	0.006331	0.000412	5	0.006791	0.000538002	5			21.4844	0.006732	0.000717	5	0.0110873	0.00274066	5			21.4844	0.00358346	0.000330127	5	0.0106948	0.000884805	5
	21.5454	0.006307	0.000414	5	0.006765	0.000541557	5			21.5454	0.006684	0.000705	5	0.0110325	0.00273396	5			21.5454	0.00355694	0.000324005	5	0.0106553	0.000863557	5
	21.6064	0.006288	0.000423	5	0.006752	0.000543096	5			21.6064	0.006708	0.000732	5	0.0107832	0.00259586	5			21.6064	0.00352581	0.000317819	5	0.0106065	0.000843468	5
	21.6675	0.006255	0.000437	5	0.006723	0.000538074	5			21.6675	0.006709	0.000738	5	0.0106736	0.00250672	5			21.6675	0.00350019	0.000314258	5	0.0105585	0.000833791	5
	21.7285	0.006204	0.000448	5	0.006697	0.000527108	5			21.7285	0.00665	0.00073	5	0.010869	0.00259751	5			21.7285	0.00347981	0.000311494	5	0.0105252	0.000828717	5
	21.7895	0.00615	0.000454	5	0.006709	0.000518096	5			21.7896	0.006588	0.000738	5	0.0110683	0.0027622	5			21.7896	0.003455	0.000306634	5	0.0105015	0.000817659	5
	21.8506	0.006108	0.000457	5	0.006744	0.000518124	5			21.8506	0.006563	0.000742	5	0.0109	0.00279877	5			21.8506	0.00342206	0.000300427	5	0.010462	0.000799228	5
	21.9116	0.006069	0.000458	5	0.006745	0.000524695	5			21.9116	0.006538	0.000745	5	0.0104705	0.00268767	5			21.9116	0.00338951	0.000296388	5	0.0103915	0.000783301	5
	21.9727	0.006023	0.000459	5	0.006694	0.00052823	5			21.9727	0.006458	0.000748	5	0.0102385	0.0026138	5			21.9727	0.00336617	0.000295963	5	0.010309	0.000778769	5
	22.0337	0.005975	0.000465	5	0.006635	0.000524602	5			22.0337	0.006339	0.000748	5	0.0103744	0.00269088	5			22.0337	0.00334869	0.000296648	5	0.0102477	0.000785662	5
	22.0947	0.005936	0.00048	5	0.006615	0.000521342	5			22.0947	0.006243	0.000745	5	0.0105387	0.00279431	5			22.0947	0.00332551	0.000295013	5	0.0102164	0.000797856	5
	22.1558	0.005906	0.0005	5	0.006616	0.000529517	5			22.1558	0.006194	0.000738	5	0.0103881	0.00274326	5			22.1558	0.00329119	0.000290541	5	0.0101953	0.000808006	5
	22.2168	0.005874	0.000509	5	0.006596	0.000546969	5			22.2168	0.006147	0.00073	5	0.0100468	0.00255403	5			22.2168	0.00325234	0.000285598	5	0.010169	0.000809893	5
	22.2778	0.005841	0.000508	5	0.006543	0.000554166	5			22.2778	0.006054	0.000722	5	0.00988374	0.00241701	5			22.2778	0.00321915	0.00028247	5	0.010144	0.000801221	5
	22.3389	0.005817	0.000508	5	0.006489	0.000537228	5			22.3389	0.005922	0.000713	5	0.00999119	0.00244443	5			22.3389	0.00319435	0.000280947	5	0.0101249	0.000788643	5
	22.3999	0.005804	0.000522	5	0.006458	0.000505468	5			22.3999	0.005813	0.000706	5	0.0101257	0.002548	5			22.3999	0.00317237	0.000278689	5	0.0100959	0.000781813	5
	22.4609	0.005783	0.000537	5	0.00644	0.000481646	5			22.4609	0.005765	0.000697	5	0.0100954	0.0025848	5			22.4609	0.003147	0.000273664	5	0.010043	0.00078124	5
	22.522	0.00574	0.000538	5	0.006417	0.00047771	5			22.522	0.005758	0.000684	5	0.00996844	0.00253009	5			22.522	0.00311738	0.000266928	5	0.00998119	0.000777622	5
	22.583	0.00569	0.000527	5	0.006386	0.000483944	5			22.583	0.005735	0.000686	5	0.00988079	0.00247601	5			22.583	0.0030866	0.000262205	5	0.00993545	0.000762283	5
	22.644	0.005657	0.00052	5	0.006357	0.000487955	5			22.644	0.005684	0.00072	5	0.00983956	0.00250501	5			22.644	0.00305711	0.000261224	5	0.00990114	0.00074033	5
	22.7051	0.005645	0.000521	5	0.006337	0.000489933	5			22.7051	0.005648	0.000773	5	0.00979391	0.00260871	5			22.7051	0.00302902	0.000261751	5	0.00985131	0.000722894	5
	22.7661	0.005632	0.000519	5	0.006328	0.000492724	5			22.7661	0.005646	0.000803	5	0.00976043	0.00271358	5			22.7661	0.00300173	0.000260813	5	0.00978425	0.000712557	5
	22.8271	0.005601	0.00051	5	0.006326	0.000491486	5			22.8271	0.005625	0.000783	5	0.00978266	0.00276253	5			22.8271	0.00297518	0.000259191	5	0.00973255	0.000702158	5
	22.8882	0.005567	0.000506	5	0.006315	0.000480437	5			22.8882	0.005541	0.00074	5	0.00984619	0.00277911	5			22.8882	0.00294944	0.000260261	5	0.00971289	0.000688817	5
	22.9492	0.005553	0.000513	5	0.006283	0.000466778	5			22.9492	0.005454	0.000723	5	0.00990808	0.00283445	5			22.9492	0.00292442	0.000264145	5	0.00969627	0.000681614	5
	23.0102	0.005556	0.000517	5	0.006229	0.000464366	5			23.0103	0.005458	0.000755	5	0.00995462	0.00295308	5			23.0103	0.00290027	0.000266761	5	0.00965092	0.000683882	5
	23.0713	0.00555	0.000507	5	0.006176	0.000471812	5			23.0713	0.005525	0.000797	5	0.00998009	0.0030831	5			23.0713	0.00287719	0.000265073	5	0.00959147	0.000690047	5
	23.1323	0.005522	0.000492	5	0.006141	0.000474131	5			23.1323	0.005519	0.000789	5	0.00996602	0.00316469	5			23.1323	0.00285491	0.000261089	5	0.00955363	0.000696418	5
	23.1934	0.005494	0.000491	5	0.006123	0.000465354	5			23.1934	0.005394	0.000742	5	0.00992276	0.00319558	5			23.1934	0.00283351	0.000259001	5	0.00953508	0.000707941	5
	23.2544	0.005486	0.000502	5	0.006106	0.000460018	5			23.2544	0.005273	0.000709	5	0.00988766	0.00320307	5			23.2544	0.00281453	0.000259958	5	0.00949982	0.000728898	5
	23.3154	0.005486	0.000504	5	0.00608	0.000473556	5			23.3154	0.005267	0.000714	5	0.00984288	0.00317923	5			23.3154	0.00279972	0.000261744	5	0.00943793	0.000749628	5
	23.3765	0.005465	0.000494	5	0.006046	0.000496756	5			23.3765	0.005304	0.00073	5	0.00971575	0.00310451	5			23.3765	0.00278793	0.000262729	5	0.00938032	0.000754873	5
	23.4375	0.005425	0.000486	5	0.006019	0.000509432	5			23.4375	0.005258	0.000732	5	0.00951746	0.00302637	5			23.4375	0.00277522	0.000263513	5	0.00934511	0.0007425	5
	23.4985	0.005403	0.000487	5	0.006011	0.000505605	5			23.4985	0.005157	0.000735	5	0.00939004	0.00302913	5			23.4985	0.00275913	0.000264591	5	0.00930913	0.000725261	5
	23.5596	0.005416	0.000488	5	0.006023	0.000496564	5			23.5596	0.005136	0.000763	5	0.00942081	0.00311474	5			23.5596	0.00274115	0.000264528	5	0.00925346	0.000713275	5
	23.6206	0.005432	0.000479	5	0.006034	0.000493403	5			23.6206	0.005194	0.000795	5	0.00948488	0.00318872	5			23.6206	0.00272347	0.000261974	5	0.00920238	0.000706224	5
	23.6816	0.005414	0.000473	5	0.006016	0.000489944	5			23.6816	0.005172	0.00079	5	0.00939652	0.00319491	5			23.6816	0.00270484	0.000258584	5	0.00918384	0.000699109	5
	23.7427	0.005366	0.00048	5	0.005966	0.000479701	5			23.7427	0.005012	0.000762	5	0.00917603	0.00319214	5			23.7427	0.00268256	0.000257133	5	0.00917716	0.000691261	5
	23.8037	0.005328	0.000486	5	0.005915	0.000473138	5			23.8037	0.00486	0.000764	5	0.0090274	0.00325242	5			23.8037	0.00265779	0.000257786	5	0.00914098	0.000684593	5
	23.8648	0.00532	0.000476	5	0.005894	0.000482252	5			23.8647	0.004846	0.000802	5	0.00905749	0.00334271	5			23.8647	0.00263563	0.000258338	5	0.00908007	0.000680751	5
	23.9258	0.005325	0.000458	5	0.005899	0.000499873	5			23.9258	0.004881	0.000804	5	0.00916269	0.00338757	5			23.9258	0.00261933	0.000257359	5	0.00903895	0.000680987	5
	23.9868	0.005319	0.000461	5	0.0059	0.000509661	5			23.9868	0.004811	0.000724	5	0.00922632	0.00340492	5			23.9868	0.00260696	0.000255228	5	0.00902958	0.000684381	5
	24.0479	0.0053	0.000489	5	0.00588	0.000507645	5			24.0479	0.004666	0.000617	5	0.00927923	0.00347313	5			24.0479	0.0025949	0.000252174	5	0.00901168	0.000689483	5
	24.1089	0.005277	0.000516	5	0.005847	0.0005006	5			24.1089	0.004607	0.000575	5	0.00937378	0.00358307	5			24.1089	0.00258206	0.000247861	5	0.00895841	0.000691506	5
	24.1699	0.005257	0.000525	5	0.005817	0.000494863	5			24.1699	0.004656	0.000617	5	0.00941737	0.00361583	5			24.1699	0.00256905	0.000243138	5	0.00889888	0.000687528	5
	24.231	0.005237	0.000523	5	0.005807	0.000490112	5			24.231	0.004655	0.000653	5	0.00927672	0.00350373	5			24.231	0.00255537	0.000240121	5	0.00886854	0.000682583	5
	24.292	0.00522	0.000526	5	0.00582	0.000489587	5			24.292	0.00451	0.000615	5	0.00900302	0.00333856	5			24.292	0.00253985	0.000239678	5	0.00885097	0.000681104	5
	24.353	0.005206	0.000533	5	0.005844	0.0004995	5			24.353	0.004331	0.000544	5	0.00880751	0.00326395	5			24.353	0.00252261	0.000239483	5	0.00880672	0.000681513	5
	24.4141	0.005186	0.000531	5	0.005852	0.000514981	5			24.4141	0.004256	0.000517	5	0.00879478	0.00330541	5			24.4141	0.0025042	0.000236354	5	0.0087394	0.000680761	5
	24.4751	0.005153	0.000523	5	0.005821	0.000522477	5			24.4751	0.004269	0.00054	5	0.00883686	0.00335782	5			24.4751	0.00248379	0.00023032	5	0.0086909	0.00067656	5
	24.5361	0.005121	0.000522	5	0.005771	0.000517103	5			24.5361	0.00427	0.000566	5	0.00876343	0.00333635	5			24.5361	0.00246082	0.000224853	5	0.00867669	0.0006692	5
	24.5972	0.005107	0.000527	5	0.005745	0.000512358	5			24.5972	0.004251	0.000575	5	0.00858584	0.00327441	5			24.5972	0.0024378	0.000222697	5	0.00866626	0.000659349	5
	24.6582	0.005111	0.000531	5	0.005763	0.00051804	5			24.6582	0.004269	0.000586	5	0.00844948	0.00325411	5			24.6582	0.00241853	0.000222604	5	0.00863409	0.000647522	5
	24.7192	0.005113	0.00053	5	0.005791	0.000523854	5			24.7192	0.004319	0.000612	5	0.00841953	0.00328072	5			24.7192	0.00240326	0.000221513	5	0.00859465	0.000638222	5
	24.7803	0.005102	0.000535	5	0.005785	0.00051552	5			24.7803	0.004334	0.000629	5	0.00842161	0.00327265	5			24.7803	0.00238853	0.000218711	5	0.00857186	0.000635413	5
	24.8413	0.005086	0.000546	5	0.005741	0.000501672	5			24.8413	0.004311	0.000623	5	0.00839094	0.00318181	5			24.8413	0.0023724	0.000216507	5	0.00856202	0.000639363	5
	24.9023	0.005081	0.000553	5	0.005694	0.000505423	5			24.9023	0.004331	0.000618	5	0.00836899	0.00306736	5			24.9023	0.00235715	0.000216964	5	0.008548	0.000646171	5
	24.9634	0.005085	0.000554	5	0.005675	0.000528275	5			24.9634	0.00443	0.000649	5	0.0083971	0.00300943	5			24.9634	0.00234531	0.000219262	5	0.0085302	0.000651986	5
	25.0244	0.005083	0.000558	5	0.005683	0.000548736	5			25.0244	0.004539	0.000708	5	0.00839776	0.0029893	5			25.0244	0.00233567	0.000220968	5	0.00851962	0.000658703	5
	25.0855	0.005061	0.000575	5	0.0057	0.000551311	5			25.0854	0.004589	0.000752	5	0.00826245	0.00292233	5			25.0854	0.00232526	0.00022111	5	0.00851166	0.000669124	5
	25.1465	0.005023	0.000591	5	0.005711	0.000543747	5			25.1465	0.004602	0.000763	5	0.00802725	0.00279671	5			25.1465	0.00231334	0.000220118	5	0.00849011	0.000679325	5
	25.2075	0.004983	0.000591	5	0.005706	0.000539813	5			25.2075	0.004627	0.000764	5	0.00784772	0.00270886	5			25.2075	0.00230079	0.000217754	5	0.00845242	0.000679128	5
	25.2686	0.004952	0.00058	5	0.00568	0.000538623	5			25.2686	0.004646	0.000785	5	0.00778131	0.00271907	5			25.2686	0.00228715	0.000213512	5	0.00841099	0.00066483	5
	25.3296	0.004936	0.000575	5	0.005645	0.000532784	5			25.3296	0.004611	0.000818	5	0.00770383	0.00273437	5			25.3296	0.00227116	0.000208549	5	0.00837199	0.000645452	5
	25.3906	0.004933	0.000584	5	0.005618	0.000525097	5			25.3906	0.004543	0.000844	5	0.00750293	0.00262651	5			25.3906	0.00225369	0.000205735	5	0.00833208	0.000634254	5
	25.4517	0.00494	0.000592	5	0.005604	0.000524868	5			25.4517	0.004521	0.00086	5	0.00726006	0.00243179	5			25.4517	0.00223719	0.000206295	5	0.00829646	0.000636124	5
	25.5127	0.004956	0.00059	5	0.005592	0.000531754	5			25.5127	0.004563	0.00088	5	0.0071379	0.00230877	5			25.5127	0.00222245	0.000207678	5	0.00827938	0.000642218	5
	25.5737	0.004973	0.000582	5	0.005573	0.000534319	5			25.5737	0.004593	0.000913	5	0.00714834	0.00230686	5			25.5737	0.00220827	0.000206334	5	0.00827984	0.000640358	5
	25.6348	0.004982	0.000578	5	0.005548	0.00052456	5			25.6348	0.004536	0.000933	5	0.00716185	0.00230561	5			25.6348	0.00219438	0.000202438	5	0.00827303	0.000628356	5
	25.6958	0.004978	0.000579	5	0.005517	0.000508983	5			25.6958	0.004417	0.000915	5	0.00712678	0.00222139	5			25.6958	0.00218181	0.000199929	5	0.00823736	0.000615988	5
	25.7568	0.004971	0.000581	5	0.005479	0.000500663	5			25.7568	0.004324	0.000873	5	0.00713456	0.00213833	5			25.7568	0.00217016	0.000201018	5	0.00817977	0.000612384	5
	25.8179	0.004966	0.000582	5	0.005444	0.000503916	5			25.8179	0.004297	0.00084	5	0.00723944	0.00215003	5			25.8179	0.00215746	0.000203406	5	0.00812464	0.000614518	5
	25.8789	0.004958	0.000582	5	0.005426	0.000512975	5			25.8789	0.004299	0.000836	5	0.00735498	0.00220556	5			25.8789	0.00214377	0.000203673	5	0.00808529	0.000613024	5
	25.9399	0.004941	0.00058	5	0.005422	0.000520904	5			25.9399	0.004288	0.000846	5	0.00740633	0.00219181	5			25.9399	0.0021316	0.000201765	5	0.00805681	0.000606408	5
	26.001	0.004924	0.000577	5	0.005405	0.000525012	5			26.001	0.004275	0.000856	5	0.00746633	0.0021386	5			26.001	0.00212143	0.000200586	5	0.0080312	0.000603869	5
	26.062	0.004921	0.00058	5	0.005362	0.000525316	5			26.062	0.004286	0.000865	5	0.00762647	0.00218384	5			26.062	0.00210966	0.000201882	5	0.00800796	0.000609084	5
	26.123	0.004931	0.000591	5	0.005321	0.000519853	5			26.123	0.004309	0.000871	5	0.00781518	0.00234361	5			26.123	0.00209392	0.000204057	5	0.00799071	0.000612202	5
	26.1841	0.004927	0.000596	5	0.005314	0.000508146	5			26.1841	0.004297	0.000861	5	0.00788183	0.00247445	5			26.1841	0.00207743	0.000204643	5	0.00798114	0.000603104	5
	26.2451	0.004897	0.000586	5	0.005331	0.000496873	5			26.2451	0.00423	0.000834	5	0.00782201	0.00247784	5			26.2451	0.00206477	0.000203479	5	0.00797656	0.000585193	5
	26.3061	0.004861	0.000573	5	0.00533	0.000494986	5			26.3062	0.004132	0.000798	5	0.00778055	0.00244738	5			26.3062	0.00205504	0.000202001	5	0.00796854	0.000571199	5
	26.3672	0.004854	0.000572	5	0.005302	0.00050664	5			26.3672	0.004028	0.000764	5	0.00783622	0.00251584	5			26.3672	0.00204329	0.000201163	5	0.00794683	0.000565376	5
	26.4282	0.004881	0.000582	5	0.005279	0.000522597	5			26.4282	0.003909	0.000724	5	0.00791851	0.00266809	5			26.4282	0.00202791	0.00020111	5	0.00791028	0.000558988	5
	26.4893	0.004911	0.000581	5	0.005287	0.000524263	5			26.4893	0.003767	0.00067	5	0.00796021	0.00279251	5			26.4893	0.00201221	0.000202128	5	0.00787114	0.000545523	5
	26.5503	0.004917	0.000567	5	0.005301	0.000506198	5			26.5503	0.003637	0.000611	5	0.00799954	0.00284485	5			26.5503	0.00199829	0.000204363	5	0.00784139	0.000531583	5
	26.6113	0.004904	0.000558	5	0.005289	0.00048235	5			26.6113	0.003567	0.00057	5	0.0080714	0.00286055	5			26.6113	0.00198407	0.000206342	5	0.00781833	0.000526667	5
	26.6724	0.004895	0.000568	5	0.005255	0.000468866	5			26.6724	0.003554	0.000562	5	0.00810965	0.0028444	5			26.6724	0.00196784	0.000206155	5	0.00779268	0.00052969	5
	26.7334	0.004898	0.000583	5	0.005238	0.00046503	5			26.7334	0.003542	0.000565	5	0.00804445	0.00277384	5			26.7334	0.00195192	0.000204123	5	0.00776749	0.000533322	5
	26.7944	0.004898	0.000585	5	0.00525	0.000458214	5			26.7944	0.003493	0.000558	5	0.00791712	0.00268864	5			26.7944	0.00193894	0.000202696	5	0.00775456	0.000535288	5
	26.8555	0.004884	0.000576	5	0.005265	0.00044605	5			26.8555	0.003433	0.000538	5	0.00780777	0.00266061	5			26.8555	0.00192734	0.000203274	5	0.00775025	0.000537975	5
	26.9165	0.00486	0.000572	5	0.005259	0.000439464	5			26.9165	0.003411	0.000518	5	0.00771113	0.00267461	5			26.9165	0.00191388	0.00020405	5	0.00773131	0.000541093	5
	26.9775	0.00484	0.000577	5	0.005241	0.000447043	5			26.9775	0.003436	0.000509	5	0.00758362	0.00264534	5			26.9775	0.00189863	0.000202464	5	0.00768464	0.000540835	5
	27.0386	0.004828	0.000581	5	0.005238	0.000463495	5			27.0386	0.003476	0.000518	5	0.00746643	0.00256841	5			27.0386	0.00188411	0.000198747	5	0.0076287	0.00053551	5
	27.0996	0.004819	0.000577	5	0.005252	0.000476913	5			27.0996	0.0035	0.000539	5	0.0074437	0.00254607	5			27.0996	0.00187068	0.000195545	5	0.00759091	0.000527169	5
	27.1606	0.004808	0.000573	5	0.005262	0.000482024	5			27.1606	0.003508	0.000553	5	0.00748845	0.00261711	5			27.1606	0.00185638	0.000194259	5	0.00757192	0.00051779	5
	27.2217	0.004799	0.000573	5	0.005246	0.000480433	5			27.2217	0.003509	0.000546	5	0.00746563	0.00266594	5			27.2217	0.00184083	0.000193412	5	0.0075501	0.000510118	5
	27.2827	0.004794	0.000573	5	0.005211	0.00047537	5			27.2827	0.003503	0.000526	5	0.00731527	0.00257907	5			27.2827	0.00182593	0.000191342	5	0.00751786	0.000508482	5
	27.3438	0.004786	0.000565	5	0.005177	0.000470238	5			27.3438	0.003478	0.000508	5	0.00714108	0.00241791	5			27.3438	0.00181228	0.000188676	5	0.00749231	0.000513556	5
	27.4048	0.004771	0.000553	5	0.005157	0.000467899	5			27.4048	0.003431	0.000499	5	0.00707353	0.00234075	5			27.4048	0.00179825	0.000186994	5	0.00748417	0.000518103	5
	27.4658	0.004754	0.000543	5	0.005147	0.000466799	5			27.4658	0.003372	0.00049	5	0.00711291	0.00240008	5			27.4658	0.00178341	0.000186297	5	0.00747654	0.00051515	5
	27.5269	0.004747	0.000538	5	0.005136	0.00046263	5			27.5269	0.00333	0.000489	5	0.00715749	0.00249149	5			27.5269	0.00176965	0.000185347	5	0.00744916	0.000512458	5
	27.5879	0.004751	0.000534	5	0.005126	0.000454968	5			27.5879	0.003339	0.000514	5	0.00713713	0.00249835	5			27.5879	0.00175774	0.000184014	5	0.00740929	0.000525433	5
	27.6489	0.004757	0.000532	5	0.005123	0.000448201	5			27.6489	0.003393	0.000549	5	0.00706694	0.00242925	5			27.6489	0.00174526	0.000183394	5	0.0073794	0.000551939	5
	27.71	0.004756	0.000534	5	0.005127	0.000447122	5			27.71	0.003429	0.000564	5	0.00700042	0.00237095	5			27.71	0.00173025	0.000183563	5	0.00736231	0.000568697	5
	27.771	0.004756	0.000535	5	0.005121	0.000448696	5			27.771	0.003394	0.000545	5	0.00697868	0.00236743	5			27.771	0.00171446	0.000183037	5	0.0073413	0.000559415	5
	27.832	0.004759	0.000532	5	0.005096	0.000445969	5			27.832	0.003309	0.000511	5	0.00701475	0.00239493	5			27.832	0.00170087	0.000180979	5	0.00731414	0.000537828	5
	27.8931	0.004759	0.00053	5	0.005069	0.000443104	5			27.8931	0.003254	0.000495	5	0.00709623	0.00242428	5			27.8931	0.00168947	0.000178499	5	0.00730178	0.000530937	5
	27.9541	0.004751	0.000534	5	0.005069	0.000450919	5			27.9541	0.003271	0.000497	5	0.00720809	0.0024674	5			27.9541	0.00167861	0.000177107	5	0.00731292	0.000545347	5
	28.0151	0.004745	0.000541	5	0.005097	0.000468624	5			28.0151	0.00332	0.000492	5	0.00735755	0.00255772	5			28.0151	0.00166901	0.000176722	5	0.0073217	0.000562614	5
	28.0762	0.004754	0.000545	5	0.005126	0.000483224	5			28.0762	0.003327	0.000475	5	0.00754948	0.00269835	5			28.0762	0.00166312	0.000176212	5	0.00729981	0.0005666	5
	28.1372	0.004773	0.000544	5	0.005131	0.000488768	5			28.1372	0.003281	0.000467	5	0.00773412	0.00284192	5			28.1372	0.00166018	0.000175295	5	0.007258	0.000562454	5
	28.1982	0.004785	0.000542	5	0.005121	0.000493817	5			28.1982	0.003225	0.000479	5	0.00783001	0.00293016	5			28.1982	0.00165542	0.000174945	5	0.00723266	0.000562344	5
	28.2593	0.00478	0.000542	5	0.00511	0.000504443	5			28.2593	0.003199	0.000497	5	0.00782218	0.00295927	5			28.2593	0.00164557	0.00017593	5	0.00723567	0.000567292	5
	28.3203	0.004773	0.000539	5	0.005099	0.000511419	5			28.3203	0.003202	0.0005	5	0.00778224	0.00297678	5			28.3203	0.00163287	0.000177639	5	0.00724166	0.000570275	5
	28.3814	0.004774	0.000533	5	0.005078	0.000503917	5			28.3813	0.003201	0.000487	5	0.00775353	0.00299468	5			28.3813	0.00162176	0.000178554	5	0.00722787	0.000568293	5
	28.4424	0.004778	0.000528	5	0.005054	0.000488953	5			28.4424	0.003167	0.000468	5	0.00768315	0.00296253	5			28.4424	0.00161335	0.000177643	5	0.00720373	0.000564404	5
	28.5034	0.004776	0.000531	5	0.005045	0.000483127	5			28.5034	0.003093	0.000443	5	0.00753646	0.00286477	5			28.5034	0.00160546	0.000175313	5	0.00718903	0.000560519	5
	28.5645	0.00477	0.00054	5	0.005048	0.000487294	5			28.5645	0.003007	0.000416	5	0.00741434	0.00279577	5			28.5645	0.00159706	0.000173209	5	0.00718154	0.000554738	5
	28.6255	0.00477	0.000549	5	0.005043	0.00048694	5			28.6255	0.002957	0.000408	5	0.00743937	0.00285842	5			28.6255	0.00158976	0.000172627	5	0.007165	0.000547139	5
	28.6865	0.004774	0.000552	5	0.005024	0.000475627	5			28.6865	0.002959	0.00043	5	0.00754727	0.0029947	5			28.6865	0.00158436	0.000172704	5	0.00713869	0.00054161	5
	28.7476	0.004774	0.000552	5	0.005009	0.000462586	5			28.7476	0.002972	0.000458	5	0.00753137	0.00302892	5			28.7476	0.00157862	0.000171296	5	0.00711803	0.000539527	5
	28.8086	0.004772	0.00055	5	0.005008	0.000457462	5			28.8086	0.002951	0.000458	5	0.00733035	0.00291275	5			28.8086	0.00156998	0.00016796	5	0.00710779	0.000535923	5
	28.8696	0.004774	0.000547	5	0.005	0.000456549	5			28.8696	0.002909	0.000433	5	0.00713933	0.00281129	5			28.8696	0.00155946	0.000165042	5	0.00709409	0.00052796	5
	28.9307	0.004777	0.000544	5	0.004969	0.000452055	5			28.9307	0.002898	0.00042	5	0.00714599	0.00287708	5			28.9307	0.00155058	0.000164734	5	0.00706757	0.000521359	5
	28.9917	0.004769	0.000543	5	0.004928	0.000448001	5			28.9917	0.002929	0.000429	5	0.00726078	0.00303119	5			28.9917	0.00154453	0.000166017	5	0.00703883	0.000521244	5
	29.0527	0.004754	0.00055	5	0.004902	0.000453981	5			29.0527	0.002954	0.000441	5	0.00724724	0.0030698	5			29.0527	0.00153846	0.000166157	5	0.00702217	0.000524368	5
	29.1138	0.004743	0.000561	5	0.004895	0.000468148	5			29.1138	0.002939	0.000439	5	0.00707123	0.00295065	5			29.1138	0.00152972	0.000164497	5	0.00701497	0.000525163	5
	29.1748	0.004738	0.000572	5	0.004887	0.000476709	5			29.1748	0.00291	0.000435	5	0.0069545	0.00284233	5			29.1748	0.00152019	0.000163015	5	0.00700376	0.000525726	5
	29.2358	0.004726	0.000573	5	0.004871	0.000471841	5			29.2358	0.002903	0.000447	5	0.00704846	0.00287321	5			29.2358	0.00151405	0.000163114	5	0.00698408	0.000531304	5
	29.2969	0.004701	0.000564	5	0.004858	0.000459292	5			29.2969	0.002907	0.000467	5	0.00720014	0.00295426	5			29.2969	0.00151143	0.00016363	5	0.00696372	0.000538612	5
	29.3579	0.004679	0.000555	5	0.004853	0.000447665	5			29.3579	0.002899	0.00048	5	0.00714749	0.00292487	5			29.3579	0.00150704	0.000162718	5	0.00694928	0.000539632	5
	29.4189	0.004673	0.000555	5	0.004841	0.000440296	5			29.4189	0.002893	0.00049	5	0.00687128	0.00278737	5			29.4189	0.00149637	0.000160434	5	0.00693893	0.00053579	5
	29.48	0.004675	0.000562	5	0.004818	0.000435882	5			29.48	0.002909	0.000505	5	0.00662621	0.00268547	5			29.48	0.00148177	0.000158083	5	0.00692831	0.00053746	5
	29.541	0.004666	0.000566	5	0.004802	0.00043343	5			29.541	0.002924	0.000516	5	0.006629	0.00270019	5			29.541	0.00146996	0.00015616	5	0.00691513	0.000547886	5
	29.602	0.004644	0.00056	5	0.00481	0.000434301	5			29.6021	0.002897	0.000511	5	0.00682423	0.00277244	5			29.6021	0.00146396	0.000154168	5	0.00689667	0.000557171	5
	29.6631	0.004619	0.00055	5	0.004825	0.000438066	5			29.6631	0.00284	0.000493	5	0.00699853	0.00281882	5			29.6631	0.00146014	0.000152037	5	0.00686972	0.000557735	5
	29.7241	0.004603	0.000542	5	0.004823	0.000441109	5			29.7241	0.002811	0.000485	5	0.00704295	0.00283627	5			29.7241	0.00145382	0.000150482	5	0.00683662	0.000556412	5
	29.7852	0.004592	0.000541	5	0.004805	0.000440009	5			29.7852	0.002826	0.000501	5	0.00702222	0.00286141	5			29.7852	0.00144537	0.000149908	5	0.00680654	0.000563353	5
	29.8462	0.004591	0.000545	5	0.004795	0.000435363	5			29.8462	0.002839	0.000522	5	0.00702129	0.00288668	5			29.8462	0.00143878	0.00015022	5	0.00678645	0.000575464	5
	29.9072	0.004606	0.000554	5	0.004802	0.000431836	5			29.9072	0.002817	0.00053	5	0.00702633	0.00286814	5			29.9072	0.00143527	0.000151281	5	0.00677304	0.000579652	5
	29.9683	0.004633	0.000562	5	0.004807	0.000432347	5			29.9683	0.002798	0.000535	5	0.00699137	0.00281202	5			29.9683	0.00143129	0.000152779	5	0.00675754	0.000572134	5
