# Supplementary material for: Microglia facilitate and stabilize the response to general anesthesia via modulating the neuronal network in a brain region-specific manner
Source: eLife. 2023 Dec 22;12:RP92252. doi: 10.7554/eLife.92252 (PMC10746144; doi:10.7554/eLife.92252)
Supplement: Figure 5—source data 3. [file elife-92252-fig5-data3.xlsx]

## Sheet: Figure 5E
		RMS of EMG
		D7			D21
	Time after pentobarbital injection	Mean	SEM	N	Mean	SEM	N
	-1198.75	0.081765	0.008549	5	0.075654	0.008123	5
	-1197.5	0.079498	0.007346	5	0.074874	0.007618	5
	-1196.25	0.077872	0.006311	5	0.077534	0.008937	5
	-1195	0.076743	0.005998	5	0.079347	0.010115	5
	-1193.75	0.076524	0.006184	5	0.078701	0.009249	5
	-1192.5	0.077187	0.005875	5	0.077683	0.00878	5
	-1191.25	0.07733	0.005831	5	0.076624	0.007928	5
	-1190	0.079655	0.006926	5	0.077449	0.008418	5
	-1188.75	0.081145	0.00757	5	0.080085	0.009846	5
	-1187.5	0.081616	0.008075	5	0.081879	0.01004	5
	-1186.25	0.081899	0.00775	5	0.082352	0.010076	5
	-1185	0.087189	0.008624	5	0.082157	0.010559	5
	-1183.75	0.087597	0.009035	5	0.08253	0.011403	5
	-1182.5	0.086729	0.008874	5	0.084755	0.012912	5
	-1181.25	0.085013	0.00868	5	0.085783	0.013976	5
	-1180	0.085725	0.008539	5	0.087211	0.014159	5
	-1178.75	0.085582	0.008171	5	0.087268	0.01413	5
	-1177.5	0.086816	0.008597	5	0.086942	0.014251	5
	-1176.25	0.086527	0.009435	5	0.08423	0.012649	5
	-1175	0.08621	0.010302	5	0.082526	0.011344	5
	-1173.75	0.087689	0.010556	5	0.083127	0.012077	5
	-1172.5	0.088496	0.010424	5	0.082626	0.012764	5
	-1171.25	0.092282	0.010288	5	0.081857	0.013241	5
	-1170	0.092485	0.010477	5	0.080651	0.012314	5
	-1168.75	0.092494	0.010525	5	0.080944	0.012257	5
	-1167.5	0.099469	0.013962	5	0.081235	0.013126	5
	-1166.25	0.100756	0.012746	5	0.081665	0.013556	5
	-1165	0.09645	0.010087	5	0.082214	0.013087	5
	-1163.75	0.096423	0.009768	5	0.081704	0.012465	5
	-1162.5	0.099256	0.010491	5	0.081584	0.010772	5
	-1161.25	0.099998	0.011063	5	0.08022	0.00974	5
	-1160	0.101306	0.012438	5	0.079679	0.009384	5
	-1158.75	0.10134	0.013422	5	0.078958	0.009282	5
	-1157.5	0.101104	0.013165	5	0.078309	0.009288	5
	-1156.25	0.101785	0.013656	5	0.079003	0.009947	5
	-1155	0.10241	0.013417	5	0.080933	0.011275	5
	-1153.75	0.102557	0.01366	5	0.081037	0.010765	5
	-1152.5	0.101893	0.013123	5	0.080346	0.009406	5
	-1151.25	0.097873	0.013432	5	0.079468	0.008963	5
	-1150	0.09651	0.01305	5	0.079077	0.009145	5
	-1148.75	0.097547	0.014563	5	0.077268	0.008609	5
	-1147.5	0.093844	0.009961	5	0.078923	0.009383	5
	-1146.25	0.092101	0.010068	5	0.078972	0.009885	5
	-1145	0.090868	0.009712	5	0.08	0.010701	5
	-1143.75	0.08979	0.009945	5	0.080542	0.011364	5
	-1142.5	0.090094	0.010022	5	0.07995	0.012419	5
	-1141.25	0.090309	0.010284	5	0.081764	0.012375	5
	-1140	0.091059	0.011098	5	0.082603	0.011956	5
	-1138.75	0.091365	0.011868	5	0.084383	0.013504	5
	-1137.5	0.092893	0.012838	5	0.086798	0.014254	5
	-1136.25	0.092611	0.013178	5	0.087028	0.013676	5
	-1135	0.099009	0.018472	5	0.084581	0.012548	5
	-1133.75	0.097921	0.018804	5	0.082885	0.011592	5
	-1132.5	0.098231	0.018743	5	0.082586	0.011411	5
	-1131.25	0.098945	0.018368	5	0.083026	0.011629	5
	-1130	0.098403	0.01807	5	0.083714	0.011767	5
	-1128.75	0.096442	0.016814	5	0.08597	0.012286	5
	-1127.5	0.093577	0.016143	5	0.084842	0.011529	5
	-1126.25	0.095335	0.01629	5	0.085226	0.011202	5
	-1125	0.09639	0.01599	5	0.084484	0.010472	5
	-1123.75	0.0963	0.015907	5	0.084211	0.009843	5
	-1122.5	0.093378	0.014878	5	0.083334	0.009301	5
	-1121.25	0.098588	0.019561	5	0.08237	0.010104	5
	-1120	0.096082	0.018939	5	0.083603	0.0119	5
	-1118.75	0.095088	0.018238	5	0.084178	0.012242	5
	-1117.5	0.09379	0.017254	5	0.081916	0.013476	5
	-1116.25	0.094537	0.016652	5	0.081259	0.014342	5
	-1115	0.088241	0.011965	5	0.081646	0.014704	5
	-1113.75	0.088744	0.012213	5	0.083151	0.014408	5
	-1112.5	0.092758	0.013639	5	0.083643	0.014053	5
	-1111.25	0.094082	0.013988	5	0.085445	0.01451	5
	-1110	0.096045	0.014471	5	0.085998	0.015078	5
	-1108.75	0.097098	0.015138	5	0.083215	0.014244	5
	-1107.5	0.097753	0.015584	5	0.080592	0.01331	5
	-1106.25	0.097796	0.015691	5	0.079911	0.013448	5
	-1105	0.096551	0.015785	5	0.080739	0.013162	5
	-1103.75	0.096744	0.015983	5	0.08195	0.013337	5
	-1102.5	0.098115	0.016914	5	0.081492	0.013335	5
	-1101.25	0.090783	0.016352	5	0.08099	0.013106	5
	-1100	0.092928	0.01609	5	0.079041	0.011726	5
	-1098.75	0.092959	0.015525	5	0.07911	0.01119	5
	-1097.5	0.093088	0.015677	5	0.081134	0.010704	5
	-1096.25	0.09401	0.017026	5	0.081708	0.010288	5
	-1095	0.094651	0.017478	5	0.081641	0.01013	5
	-1093.75	0.095857	0.018146	5	0.080416	0.010866	5
	-1092.5	0.093417	0.017093	5	0.085437	0.011127	5
	-1091.25	0.092093	0.016896	5	0.0852	0.010335	5
	-1090	0.093118	0.018203	5	0.084305	0.009328	5
	-1088.75	0.093198	0.018273	5	0.084945	0.008496	5
	-1087.5	0.093614	0.018791	5	0.086393	0.009142	5
	-1086.25	0.092249	0.018813	5	0.08724	0.009075	5
	-1085	0.092523	0.019077	5	0.087072	0.00896	5
	-1083.75	0.092413	0.018871	5	0.086442	0.008592	5
	-1082.5	0.09627	0.019373	5	0.087345	0.008735	5
	-1081.25	0.095924	0.019393	5	0.087734	0.008915	5
	-1080	0.095682	0.019074	5	0.087872	0.00865	5
	-1078.75	0.095569	0.01951	5	0.086227	0.00877	5
	-1077.5	0.095355	0.019253	5	0.084729	0.009074	5
	-1076.25	0.093611	0.019631	5	0.085467	0.009401	5
	-1075	0.092526	0.019636	5	0.08625	0.010236	5
	-1073.75	0.089912	0.018416	5	0.086728	0.010088	5
	-1072.5	0.08881	0.018727	5	0.083823	0.008185	5
	-1071.25	0.089883	0.0198	5	0.082856	0.00715	5
	-1070	0.088567	0.018998	5	0.082913	0.006912	5
	-1068.75	0.087649	0.018746	5	0.083274	0.007117	5
	-1067.5	0.087762	0.019476	5	0.083391	0.007126	5
	-1066.25	0.087956	0.020318	5	0.082435	0.006565	5
	-1065	0.089369	0.02093	5	0.081708	0.006343	5
	-1063.75	0.089665	0.021022	5	0.081346	0.007087	5
	-1062.5	0.08443	0.021669	5	0.080373	0.007306	5
	-1061.25	0.084314	0.021397	5	0.079123	0.007096	5
	-1060	0.087436	0.023701	5	0.07867	0.00816	5
	-1058.75	0.087397	0.023277	5	0.078603	0.009297	5
	-1057.5	0.086971	0.023383	5	0.078418	0.009955	5
	-1056.25	0.087725	0.02236	5	0.07716	0.010362	5
	-1055	0.087661	0.02141	5	0.075963	0.010209	5
	-1053.75	0.087897	0.021123	5	0.074892	0.010516	5
	-1052.5	0.088292	0.020185	5	0.074335	0.010214	5
	-1051.25	0.087481	0.019432	5	0.074447	0.009846	5
	-1050	0.087466	0.017525	5	0.075666	0.010762	5
	-1048.75	0.087896	0.016728	5	0.074976	0.012014	5
	-1047.5	0.088391	0.015208	5	0.074276	0.01223	5
	-1046.25	0.091587	0.013418	5	0.073611	0.01361	5
	-1045	0.091256	0.011685	5	0.073118	0.013977	5
	-1043.75	0.091616	0.010964	5	0.071285	0.013956	5
	-1042.5	0.090782	0.010225	5	0.071624	0.014333	5
	-1041.25	0.090007	0.010913	5	0.072408	0.014639	5
	-1040	0.083116	0.010428	5	0.07272	0.013415	5
	-1038.75	0.084767	0.011551	5	0.073256	0.01123	5
	-1037.5	0.100131	0.01958	5	0.073609	0.009253	5
	-1036.25	0.101459	0.020852	5	0.073191	0.008692	5
	-1035	0.102888	0.020184	5	0.073268	0.00865	5
	-1033.75	0.104492	0.020432	5	0.074043	0.008986	5
	-1032.5	0.103684	0.020368	5	0.073946	0.00859	5
	-1031.25	0.104422	0.020149	5	0.075989	0.007958	5
	-1030	0.104682	0.020979	5	0.075836	0.007791	5
	-1028.75	0.104196	0.021308	5	0.076592	0.008084	5
	-1027.5	0.10444	0.022851	5	0.076539	0.007674	5
	-1026.25	0.102275	0.024015	5	0.075466	0.007404	5
	-1025	0.101588	0.024962	5	0.07492	0.007413	5
	-1023.75	0.101687	0.025948	5	0.076484	0.007085	5
	-1022.5	0.101109	0.026622	5	0.076332	0.006393	5
	-1021.25	0.101817	0.025951	5	0.075707	0.006512	5
	-1020	0.10197	0.025815	5	0.075869	0.006091	5
	-1018.75	0.100259	0.025037	5	0.075392	0.005663	5
	-1017.5	0.088303	0.015539	5	0.074126	0.00551	5
	-1016.25	0.08527	0.013174	5	0.074614	0.004731	5
	-1015	0.083694	0.01388	5	0.07409	0.004106	5
	-1013.75	0.0825	0.013838	5	0.072644	0.003473	5
	-1012.5	0.083625	0.013763	5	0.071645	0.00309	5
	-1011.25	0.085854	0.011879	5	0.069784	0.002632	5
	-1010	0.086167	0.010955	5	0.067902	0.002568	5
	-1008.75	0.085942	0.01073	5	0.066391	0.001641	5
	-1007.5	0.085824	0.009082	5	0.065869	0.001718	5
	-1006.25	0.085017	0.009111	5	0.066619	0.001884	5
	-1005	0.084826	0.00959	5	0.067617	0.002561	5
	-1003.75	0.082786	0.00993	5	0.066804	0.003124	5
	-1002.5	0.081984	0.010641	5	0.066388	0.003761	5
	-1001.25	0.080764	0.010542	5	0.066815	0.003085	5
	-1000	0.081849	0.010746	5	0.068403	0.001073	5
	-998.75	0.08316	0.011155	5	0.069396	0.001204	5
	-997.5	0.084769	0.009833	5	0.069433	0.000762	5
	-996.25	0.085741	0.009136	5	0.069648	0.00192	5
	-995	0.085298	0.008376	5	0.069387	0.002493	5
	-993.75	0.085564	0.007579	5	0.071623	0.004426	5
	-992.5	0.085919	0.006532	5	0.071936	0.005305	5
	-991.25	0.085306	0.008018	5	0.072013	0.006494	5
	-990	0.084501	0.007494	5	0.073142	0.006666	5
	-988.75	0.086373	0.006618	5	0.073891	0.006457	5
	-987.5	0.084352	0.005876	5	0.077802	0.005958	5
	-986.25	0.083498	0.005635	5	0.078403	0.006302	5
	-985	0.083656	0.006935	5	0.078381	0.006278	5
	-983.75	0.083839	0.007313	5	0.079231	0.0061	5
	-982.5	0.085075	0.008033	5	0.080921	0.007351	5
	-981.25	0.08661	0.008941	5	0.081511	0.007852	5
	-980	0.085361	0.009687	5	0.083616	0.007441	5
	-978.75	0.085541	0.009742	5	0.08323	0.007291	5
	-977.5	0.08437	0.009611	5	0.08419	0.007095	5
	-976.25	0.084899	0.010024	5	0.085123	0.007182	5
	-975	0.087201	0.010516	5	0.086341	0.007469	5
	-973.75	0.089714	0.011093	5	0.085655	0.007891	5
	-972.5	0.09042	0.011372	5	0.086106	0.008271	5
	-971.25	0.090281	0.011299	5	0.086066	0.009199	5
	-970	0.092198	0.011471	5	0.085059	0.009361	5
	-968.75	0.094223	0.012159	5	0.084531	0.009443	5
	-967.5	0.097515	0.012373	5	0.081539	0.009693	5
	-966.25	0.098878	0.012658	5	0.080593	0.009856	5
	-965	0.099565	0.01248	5	0.080398	0.009795	5
	-963.75	0.101604	0.013166	5	0.08175	0.010186	5
	-962.5	0.101273	0.013448	5	0.079816	0.009844	5
	-961.25	0.101336	0.013442	5	0.080364	0.010178	5
	-960	0.101493	0.01341	5	0.07861	0.01141	5
	-958.75	0.10068	0.013702	5	0.080154	0.012092	5
	-957.5	0.101276	0.013995	5	0.082702	0.014267	5
	-956.25	0.101925	0.013881	5	0.083132	0.014398	5
	-955	0.102088	0.014061	5	0.08378	0.014481	5
	-953.75	0.101932	0.014853	5	0.083712	0.014854	5
	-952.5	0.103496	0.015446	5	0.083554	0.014703	5
	-951.25	0.105982	0.014923	5	0.083714	0.014359	5
	-950	0.107922	0.014925	5	0.083733	0.014348	5
	-948.75	0.107104	0.015123	5	0.084911	0.015166	5
	-947.5	0.106227	0.014593	5	0.084948	0.016029	5
	-946.25	0.106695	0.01535	5	0.086129	0.016216	5
	-945	0.108694	0.016998	5	0.089569	0.017986	5
	-943.75	0.108942	0.017051	5	0.088804	0.018071	5
	-942.5	0.111843	0.018687	5	0.089363	0.017988	5
	-941.25	0.114309	0.02076	5	0.091447	0.016643	5
	-940	0.116355	0.022624	5	0.092788	0.015489	5
	-938.75	0.117326	0.023341	5	0.091535	0.014865	5
	-937.5	0.11667	0.023333	5	0.089107	0.013671	5
	-936.25	0.116843	0.023343	5	0.087356	0.012967	5
	-935	0.118031	0.026124	5	0.087261	0.011932	5
	-933.75	0.116654	0.025289	5	0.086084	0.010944	5
	-932.5	0.115196	0.024381	5	0.085553	0.01076	5
	-931.25	0.114079	0.025129	5	0.084855	0.01081	5
	-930	0.112534	0.025125	5	0.085475	0.011124	5
	-928.75	0.112003	0.026059	5	0.083776	0.010596	5
	-927.5	0.113662	0.026977	5	0.083575	0.009845	5
	-926.25	0.113363	0.027349	5	0.082695	0.008727	5
	-925	0.11139	0.025894	5	0.078108	0.006548	5
	-923.75	0.112601	0.026006	5	0.077003	0.006353	5
	-922.5	0.112384	0.02396	5	0.075824	0.006573	5
	-921.25	0.110013	0.022471	5	0.073827	0.007087	5
	-920	0.10708	0.02086	5	0.072616	0.007195	5
	-918.75	0.107616	0.021364	5	0.073822	0.008316	5
	-917.5	0.108773	0.022104	5	0.073694	0.008211	5
	-916.25	0.108267	0.021909	5	0.073165	0.008133	5
	-915	0.106909	0.020662	5	0.071712	0.008302	5
	-913.75	0.108293	0.020784	5	0.07188	0.008488	5
	-912.5	0.109461	0.020337	5	0.071929	0.008055	5
	-911.25	0.108864	0.018557	5	0.07199	0.008405	5
	-910	0.107751	0.01749	5	0.070801	0.007752	5
	-908.75	0.106382	0.016226	5	0.070483	0.00762	5
	-907.5	0.10384	0.014925	5	0.069773	0.007865	5
	-906.25	0.10207	0.013855	5	0.069898	0.008074	5
	-905	0.100528	0.013483	5	0.070273	0.007858	5
	-903.75	0.09688	0.011977	5	0.070213	0.007447	5
	-902.5	0.093636	0.012191	5	0.071401	0.00684	5
	-901.25	0.092152	0.011367	5	0.071592	0.007906	5
	-900	0.092948	0.011855	5	0.070859	0.00758	5
	-898.75	0.090956	0.01089	5	0.070065	0.006	5
	-897.5	0.088903	0.010018	5	0.075689	0.005357	5
	-896.25	0.087623	0.009487	5	0.077156	0.00568	5
	-895	0.083272	0.007156	5	0.078435	0.006217	5
	-893.75	0.080419	0.006708	5	0.079085	0.006906	5
	-892.5	0.079146	0.006775	5	0.078472	0.007664	5
	-891.25	0.079351	0.007513	5	0.078059	0.007525	5
	-890	0.079775	0.007943	5	0.077603	0.007377	5
	-888.75	0.082322	0.008889	5	0.077138	0.006966	5
	-887.5	0.081492	0.009121	5	0.077135	0.007851	5
	-886.25	0.083618	0.010824	5	0.077191	0.008378	5
	-885	0.084366	0.011617	5	0.075881	0.009026	5
	-883.75	0.084162	0.012059	5	0.074616	0.009298	5
	-882.5	0.085236	0.012918	5	0.073613	0.009196	5
	-881.25	0.085846	0.013972	5	0.071464	0.008881	5
	-880	0.085092	0.014702	5	0.070291	0.009786	5
	-878.75	0.083998	0.015481	5	0.069825	0.010945	5
	-877.5	0.086108	0.015585	5	0.063693	0.009679	5
	-876.25	0.087068	0.01575	5	0.062492	0.009494	5
	-875	0.088909	0.015623	5	0.061683	0.009882	5
	-873.75	0.090582	0.01559	5	0.063337	0.011109	5
	-872.5	0.090138	0.015044	5	0.066464	0.013462	5
	-871.25	0.088726	0.014268	5	0.068041	0.014196	5
	-870	0.088294	0.013708	5	0.068978	0.014625	5
	-868.75	0.087572	0.012327	5	0.069789	0.015424	5
	-867.5	0.088409	0.011187	5	0.070326	0.014895	5
	-866.25	0.087002	0.009804	5	0.069791	0.014324	5
	-865	0.089308	0.010823	5	0.070717	0.01415	5
	-863.75	0.088907	0.011131	5	0.072205	0.01416	5
	-862.5	0.087104	0.01038	5	0.072445	0.014085	5
	-861.25	0.085488	0.010748	5	0.07392	0.013929	5
	-860	0.085156	0.011123	5	0.07478	0.014102	5
	-858.75	0.084746	0.012136	5	0.075837	0.013947	5
	-857.5	0.084076	0.011314	5	0.076574	0.014129	5
	-856.25	0.085812	0.010915	5	0.077785	0.01347	5
	-855	0.086912	0.010907	5	0.078719	0.013003	5
	-853.75	0.088806	0.010636	5	0.078629	0.011927	5
	-852.5	0.090064	0.010491	5	0.076079	0.009603	5
	-851.25	0.091125	0.011095	5	0.074464	0.008777	5
	-850	0.091986	0.011374	5	0.07421	0.008804	5
	-848.75	0.093014	0.01047	5	0.075372	0.009428	5
	-847.5	0.092089	0.0111	5	0.075477	0.009276	5
	-846.25	0.091096	0.011708	5	0.076301	0.009075	5
	-845	0.086424	0.014937	5	0.078674	0.009193	5
	-843.75	0.087116	0.015296	5	0.079451	0.008897	5
	-842.5	0.088735	0.015613	5	0.081502	0.009111	5
	-841.25	0.09052	0.016322	5	0.080937	0.008929	5
	-840	0.090723	0.016519	5	0.081418	0.008464	5
	-838.75	0.093535	0.015708	5	0.080847	0.009148	5
	-837.5	0.095341	0.015786	5	0.080575	0.00953	5
	-836.25	0.096169	0.014563	5	0.080926	0.009824	5
	-835	0.095117	0.013904	5	0.082175	0.009961	5
	-833.75	0.092768	0.013072	5	0.08287	0.009213	5
	-832.5	0.093263	0.013149	5	0.084968	0.009686	5
	-831.25	0.094958	0.011119	5	0.085505	0.00994	5
	-830	0.095948	0.010154	5	0.08601	0.00907	5
	-828.75	0.093946	0.010421	5	0.084435	0.008453	5
	-827.5	0.09304	0.010134	5	0.084034	0.008495	5
	-826.25	0.092893	0.009669	5	0.083992	0.008318	5
	-825	0.091903	0.009037	5	0.081815	0.006938	5
	-823.75	0.093271	0.008858	5	0.080753	0.007271	5
	-822.5	0.093751	0.00917	5	0.080301	0.007829	5
	-821.25	0.094249	0.010334	5	0.080711	0.008862	5
	-820	0.094689	0.010314	5	0.08006	0.009027	5
	-818.75	0.092317	0.011581	5	0.079054	0.008651	5
	-817.5	0.099216	0.013054	5	0.080514	0.009165	5
	-816.25	0.098829	0.013425	5	0.080521	0.009491	5
	-815	0.09891	0.014107	5	0.078927	0.009425	5
	-813.75	0.099825	0.013897	5	0.076057	0.009926	5
	-812.5	0.099487	0.013935	5	0.074135	0.009677	5
	-811.25	0.098025	0.0138	5	0.073756	0.010273	5
	-810	0.097259	0.014965	5	0.073314	0.011705	5
	-808.75	0.098174	0.015276	5	0.073187	0.012236	5
	-807.5	0.099128	0.015803	5	0.073192	0.011597	5
	-806.25	0.099955	0.016291	5	0.072543	0.011623	5
	-805	0.101731	0.016786	5	0.07318	0.012033	5
	-803.75	0.101296	0.01701	5	0.073326	0.011694	5
	-802.5	0.100254	0.016611	5	0.072355	0.010851	5
	-801.25	0.099013	0.0166	5	0.072193	0.010742	5
	-800	0.098074	0.01733	5	0.071744	0.011255	5
	-798.75	0.100213	0.017066	5	0.071308	0.011665	5
	-797.5	0.095754	0.014332	5	0.068479	0.011784	5
	-796.25	0.100103	0.015619	5	0.067542	0.011753	5
	-795	0.101647	0.015355	5	0.06659	0.011448	5
	-793.75	0.100665	0.015409	5	0.067794	0.011074	5
	-792.5	0.100276	0.015994	5	0.068013	0.011015	5
	-791.25	0.101516	0.016422	5	0.068358	0.010894	5
	-790	0.102094	0.016841	5	0.069063	0.010868	5
	-788.75	0.100532	0.016981	5	0.067926	0.010838	5
	-787.5	0.102098	0.016351	5	0.067121	0.010811	5
	-786.25	0.104264	0.015498	5	0.066631	0.011235	5
	-785	0.10539	0.016123	5	0.065168	0.010861	5
	-783.75	0.106691	0.016642	5	0.064952	0.011343	5
	-782.5	0.107317	0.016839	5	0.064718	0.011775	5
	-781.25	0.108434	0.01697	5	0.064036	0.011284	5
	-780	0.110651	0.017217	5	0.06406	0.010366	5
	-778.75	0.110204	0.017219	5	0.063948	0.009855	5
	-777.5	0.110394	0.016461	5	0.064242	0.009995	5
	-776.25	0.106544	0.015446	5	0.064407	0.009231	5
	-775	0.107571	0.015385	5	0.065627	0.009528	5
	-773.75	0.109865	0.015968	5	0.066287	0.00892	5
	-772.5	0.110335	0.015919	5	0.064628	0.008993	5
	-771.25	0.109976	0.015443	5	0.064679	0.008201	5
	-770	0.109554	0.014271	5	0.063722	0.007167	5
	-768.75	0.112495	0.014891	5	0.064138	0.007391	5
	-767.5	0.116064	0.017181	5	0.06715	0.007691	5
	-766.25	0.114541	0.01833	5	0.068364	0.007786	5
	-765	0.1168	0.019974	5	0.068741	0.007726	5
	-763.75	0.11422	0.018897	5	0.068055	0.007311	5
	-762.5	0.112503	0.018468	5	0.06881	0.007403	5
	-761.25	0.109594	0.018348	5	0.068975	0.007499	5
	-760	0.106927	0.017586	5	0.068527	0.007744	5
	-758.75	0.105697	0.017524	5	0.06809	0.007562	5
	-757.5	0.102823	0.017476	5	0.0669	0.007282	5
	-756.25	0.101058	0.017557	5	0.065911	0.007411	5
	-755	0.097884	0.017103	5	0.064947	0.00833	5
	-753.75	0.095471	0.016326	5	0.063761	0.00933	5
	-752.5	0.096323	0.016262	5	0.064785	0.009639	5
	-751.25	0.098412	0.016593	5	0.064632	0.009232	5
	-750	0.098036	0.017036	5	0.066924	0.00982	5
	-748.75	0.095399	0.01672	5	0.070051	0.009472	5
	-747.5	0.089312	0.013212	5	0.069761	0.00834	5
	-746.25	0.086893	0.012309	5	0.07019	0.008376	5
	-745	0.08215	0.00825	5	0.071714	0.009339	5
	-743.75	0.08385	0.008357	5	0.072712	0.00964	5
	-742.5	0.085572	0.008577	5	0.074887	0.008829	5
	-741.25	0.088066	0.009281	5	0.077053	0.009498	5
	-740	0.088854	0.010501	5	0.077533	0.009537	5
	-738.75	0.089129	0.011562	5	0.078762	0.009518	5
	-737.5	0.088332	0.011649	5	0.07966	0.00963	5
	-736.25	0.088252	0.011728	5	0.081059	0.010108	5
	-735	0.088502	0.011876	5	0.081175	0.010651	5
	-733.75	0.087902	0.012485	5	0.080295	0.011274	5
	-732.5	0.087722	0.011432	5	0.079383	0.011309	5
	-731.25	0.084857	0.010175	5	0.078421	0.011292	5
	-730	0.085606	0.00978	5	0.075529	0.011113	5
	-728.75	0.086243	0.009172	5	0.072925	0.009933	5
	-727.5	0.088972	0.009987	5	0.071179	0.009753	5
	-726.25	0.091157	0.010977	5	0.069989	0.009528	5
	-725	0.090655	0.011424	5	0.06821	0.008884	5
	-723.75	0.093976	0.011823	5	0.067001	0.008297	5
	-722.5	0.096997	0.012442	5	0.06435	0.008936	5
	-721.25	0.098581	0.014276	5	0.061036	0.008383	5
	-720	0.097674	0.013712	5	0.059811	0.008388	5
	-718.75	0.096475	0.012167	5	0.05801	0.008994	5
	-717.5	0.09849	0.012072	5	0.056863	0.008856	5
	-716.25	0.099614	0.011763	5	0.056451	0.008821	5
	-715	0.100233	0.011782	5	0.055852	0.008495	5
	-713.75	0.100479	0.011738	5	0.057736	0.007659	5
	-712.5	0.098398	0.01222	5	0.059606	0.007228	5
	-711.25	0.0995	0.012593	5	0.061232	0.007628	5
	-710	0.099394	0.013136	5	0.063075	0.009372	5
	-708.75	0.101036	0.015353	5	0.063504	0.010651	5
	-707.5	0.098982	0.015626	5	0.064551	0.010497	5
	-706.25	0.100627	0.017218	5	0.065546	0.010231	5
	-705	0.100427	0.017547	5	0.066359	0.010876	5
	-703.75	0.099393	0.018828	5	0.067675	0.011761	5
	-702.5	0.095576	0.018531	5	0.067487	0.011658	5
	-701.25	0.092892	0.017892	5	0.067916	0.012117	5
	-700	0.093058	0.018202	5	0.06894	0.012465	5
	-698.75	0.09226	0.018571	5	0.069613	0.012792	5
	-697.5	0.090379	0.018004	5	0.069324	0.012783	5
	-696.25	0.089966	0.018112	5	0.069355	0.012066	5
	-695	0.090897	0.019779	5	0.069838	0.011474	5
	-693.75	0.090342	0.02049	5	0.070144	0.010749	5
	-692.5	0.090001	0.020378	5	0.07229	0.010009	5
	-691.25	0.087884	0.01926	5	0.074054	0.009665	5
	-690	0.087844	0.018682	5	0.073243	0.008523	5
	-688.75	0.084206	0.017127	5	0.074112	0.008106	5
	-687.5	0.084483	0.016824	5	0.07342	0.007758	5
	-686.25	0.081233	0.014971	5	0.073036	0.007931	5
	-685	0.081307	0.014705	5	0.073267	0.007595	5
	-683.75	0.077959	0.013701	5	0.073633	0.007143	5
	-682.5	0.079452	0.014449	5	0.073458	0.008154	5
	-681.25	0.078026	0.013691	5	0.073214	0.008	5
	-680	0.077113	0.013486	5	0.072378	0.007914	5
	-678.75	0.078088	0.014441	5	0.072375	0.008543	5
	-677.5	0.081937	0.015717	5	0.073808	0.009566	5
	-676.25	0.084604	0.015461	5	0.073966	0.011757	5
	-675	0.081855	0.01485	5	0.072921	0.012164	5
	-673.75	0.082056	0.015893	5	0.072786	0.012335	5
	-672.5	0.082346	0.016825	5	0.06983	0.01384	5
	-671.25	0.082942	0.01763	5	0.067331	0.014309	5
	-670	0.081762	0.017361	5	0.067329	0.014334	5
	-668.75	0.082681	0.017611	5	0.065531	0.013999	5
	-667.5	0.081809	0.018192	5	0.066352	0.0137	5
	-666.25	0.081384	0.017561	5	0.066161	0.01335	5
	-665	0.081614	0.017574	5	0.066018	0.012878	5
	-663.75	0.081825	0.017087	5	0.06453	0.012443	5
	-662.5	0.080532	0.016017	5	0.063884	0.01147	5
	-661.25	0.081111	0.016251	5	0.068399	0.014294	5
	-660	0.085084	0.017425	5	0.069939	0.014287	5
	-658.75	0.085493	0.017571	5	0.069621	0.013872	5
	-657.5	0.082915	0.017277	5	0.069611	0.013458	5
	-656.25	0.078971	0.017618	5	0.068806	0.012539	5
	-655	0.078854	0.01747	5	0.069199	0.011974	5
	-653.75	0.077996	0.016508	5	0.068573	0.012401	5
	-652.5	0.078428	0.01609	5	0.06793	0.012096	5
	-651.25	0.078982	0.015389	5	0.066943	0.011745	5
	-650	0.08136	0.015903	5	0.065946	0.011936	5
	-648.75	0.081527	0.016212	5	0.066678	0.012217	5
	-647.5	0.080159	0.015844	5	0.067771	0.011993	5
	-646.25	0.080571	0.015893	5	0.067605	0.011977	5
	-645	0.079253	0.015231	5	0.066991	0.012229	5
	-643.75	0.078015	0.015342	5	0.067169	0.012291	5
	-642.5	0.078084	0.015554	5	0.068682	0.012489	5
	-641.25	0.079135	0.015238	5	0.063634	0.008635	5
	-640	0.076477	0.01282	5	0.061727	0.008262	5
	-638.75	0.074952	0.012141	5	0.060804	0.007923	5
	-637.5	0.073513	0.011557	5	0.059273	0.007221	5
	-636.25	0.073912	0.011672	5	0.060009	0.00779	5
	-635	0.078469	0.016406	5	0.060516	0.008179	5
	-633.75	0.07782	0.01639	5	0.060279	0.008196	5
	-632.5	0.077377	0.016936	5	0.061542	0.008707	5
	-631.25	0.07699	0.016351	5	0.063415	0.008784	5
	-630	0.073912	0.014923	5	0.063727	0.008619	5
	-628.75	0.072921	0.014077	5	0.06411	0.008128	5
	-627.5	0.07356	0.013691	5	0.063735	0.008824	5
	-626.25	0.075018	0.015107	5	0.063508	0.009225	5
	-625	0.075239	0.016143	5	0.063779	0.00924	5
	-623.75	0.076848	0.018714	5	0.066484	0.009101	5
	-622.5	0.076578	0.018279	5	0.064485	0.008414	5
	-621.25	0.074353	0.017973	5	0.065743	0.008804	5
	-620	0.072871	0.018118	5	0.06656	0.008751	5
	-618.75	0.071918	0.018221	5	0.067244	0.008673	5
	-617.5	0.073504	0.017711	5	0.068188	0.008934	5
	-616.25	0.073041	0.01808	5	0.067212	0.008598	5
	-615	0.090098	0.034879	5	0.066617	0.008435	5
	-613.75	0.092335	0.036637	5	0.069758	0.009326	5
	-612.5	0.093676	0.036084	5	0.069924	0.009586	5
	-611.25	0.095117	0.036028	5	0.069385	0.010056	5
	-610	0.096723	0.035545	5	0.068956	0.010178	5
	-608.75	0.096671	0.035319	5	0.068293	0.010371	5
	-607.5	0.096954	0.035551	5	0.066744	0.010225	5
	-606.25	0.095254	0.035074	5	0.068245	0.010089	5
	-605	0.095014	0.034459	5	0.068115	0.010445	5
	-603.75	0.093924	0.032778	5	0.065513	0.010952	5
	-602.5	0.094543	0.032921	5	0.066213	0.01082	5
	-601.25	0.095291	0.032794	5	0.064811	0.010705	5
	-600	0.095419	0.03272	5	0.064162	0.010855	5
	-598.75	0.095947	0.032714	5	0.063692	0.011411	5
	-597.5	0.09484	0.032987	5	0.063606	0.011195	5
	-596.25	0.095052	0.032616	5	0.063484	0.010861	5
	-595	0.071732	0.012209	5	0.063212	0.010769	5
	-593.75	0.069242	0.0104	5	0.059128	0.010467	5
	-592.5	0.068687	0.01032	5	0.057916	0.010544	5
	-591.25	0.068689	0.010326	5	0.058147	0.010628	5
	-590	0.069979	0.011319	5	0.058481	0.010716	5
	-588.75	0.0728	0.012717	5	0.059353	0.010936	5
	-587.5	0.072598	0.012934	5	0.05934	0.010714	5
	-586.25	0.072492	0.013221	5	0.058142	0.010425	5
	-585	0.072119	0.013024	5	0.057895	0.010581	5
	-583.75	0.072502	0.012992	5	0.056814	0.010432	5
	-582.5	0.072006	0.012571	5	0.057323	0.010637	5
	-581.25	0.073607	0.012402	5	0.057957	0.010473	5
	-580	0.073904	0.01222	5	0.058638	0.010303	5
	-578.75	0.074559	0.011951	5	0.058948	0.010379	5
	-577.5	0.077382	0.012715	5	0.059387	0.010844	5
	-576.25	0.077744	0.013023	5	0.058451	0.010529	5
	-575	0.077568	0.012542	5	0.05908	0.010777	5
	-573.75	0.075989	0.012803	5	0.060109	0.010351	5
	-572.5	0.074902	0.012866	5	0.060154	0.010121	5
	-571.25	0.073145	0.012792	5	0.060146	0.009547	5
	-570	0.073358	0.012335	5	0.061888	0.010031	5
	-568.75	0.073146	0.013768	5	0.061234	0.010425	5
	-567.5	0.073498	0.014873	5	0.062108	0.010718	5
	-566.25	0.073486	0.016598	5	0.063214	0.010763	5
	-565	0.07362	0.017142	5	0.063869	0.010602	5
	-563.75	0.074806	0.018825	5	0.064616	0.010677	5
	-562.5	0.077192	0.018365	5	0.065206	0.010902	5
	-561.25	0.077038	0.018459	5	0.064685	0.011175	5
	-560	0.080385	0.017536	5	0.064734	0.011561	5
	-558.75	0.081604	0.01716	5	0.064619	0.011221	5
	-557.5	0.082229	0.016886	5	0.064499	0.011015	5
	-556.25	0.082185	0.016298	5	0.065358	0.01098	5
	-555	0.083495	0.017496	5	0.065683	0.010732	5
	-553.75	0.084549	0.018067	5	0.065213	0.01083	5
	-552.5	0.085056	0.019225	5	0.064783	0.010766	5
	-551.25	0.086699	0.01963	5	0.064343	0.010332	5
	-550	0.089234	0.019241	5	0.063324	0.009822	5
	-548.75	0.088912	0.018606	5	0.063375	0.009884	5
	-547.5	0.089954	0.0185	5	0.063988	0.010304	5
	-546.25	0.090917	0.018372	5	0.066502	0.009896	5
	-545	0.094488	0.019175	5	0.066646	0.010004	5
	-543.75	0.095732	0.018949	5	0.06764	0.010585	5
	-542.5	0.094838	0.019062	5	0.067471	0.010284	5
	-541.25	0.095014	0.018897	5	0.068105	0.010338	5
	-540	0.094886	0.018885	5	0.068154	0.010229	5
	-538.75	0.094592	0.018724	5	0.069379	0.010861	5
	-537.5	0.094563	0.018575	5	0.069898	0.011421	5
	-536.25	0.096773	0.019482	5	0.070452	0.011016	5
	-535	0.097842	0.019343	5	0.072276	0.011695	5
	-533.75	0.098155	0.019133	5	0.073049	0.012331	5
	-532.5	0.09838	0.018864	5	0.073547	0.011942	5
	-531.25	0.097927	0.018525	5	0.073379	0.012227	5
	-530	0.095737	0.018211	5	0.074125	0.012132	5
	-528.75	0.094439	0.017793	5	0.074686	0.011288	5
	-527.5	0.093256	0.017633	5	0.074584	0.010227	5
	-526.25	0.093199	0.018901	5	0.072204	0.009825	5
	-525	0.090018	0.018171	5	0.07218	0.008888	5
	-523.75	0.087561	0.017691	5	0.072269	0.008911	5
	-522.5	0.086997	0.01783	5	0.073231	0.009521	5
	-521.25	0.085932	0.017861	5	0.073274	0.009777	5
	-520	0.085663	0.018433	5	0.073758	0.010009	5
	-518.75	0.086097	0.018896	5	0.073995	0.009561	5
	-517.5	0.083673	0.018577	5	0.074451	0.009295	5
	-516.25	0.081272	0.01813	5	0.074442	0.009469	5
	-515	0.077932	0.017816	5	0.071967	0.00824	5
	-513.75	0.076098	0.017063	5	0.071053	0.007176	5
	-512.5	0.07461	0.016591	5	0.071664	0.007077	5
	-511.25	0.073328	0.017028	5	0.071953	0.006982	5
	-510	0.073677	0.016879	5	0.07179	0.006588	5
	-508.75	0.076088	0.01742	5	0.070759	0.006674	5
	-507.5	0.07773	0.019267	5	0.070743	0.007113	5
	-506.25	0.076252	0.017969	5	0.071205	0.007595	5
	-505	0.076298	0.017112	5	0.073375	0.008737	5
	-503.75	0.075376	0.016402	5	0.073629	0.008478	5
	-502.5	0.075137	0.015804	5	0.073671	0.007529	5
	-501.25	0.075156	0.015568	5	0.073862	0.006777	5
	-500	0.073488	0.014705	5	0.073474	0.006069	5
	-498.75	0.071645	0.013799	5	0.073129	0.005895	5
	-497.5	0.071562	0.013273	5	0.073543	0.006064	5
	-496.25	0.071362	0.012596	5	0.074619	0.006591	5
	-495	0.072327	0.012722	5	0.075327	0.006861	5
	-493.75	0.072834	0.012988	5	0.074976	0.007066	5
	-492.5	0.073017	0.013004	5	0.074963	0.007462	5
	-491.25	0.073076	0.012724	5	0.075666	0.007376	5
	-490	0.071953	0.012178	5	0.075265	0.007612	5
	-488.75	0.06863	0.010315	5	0.075949	0.007834	5
	-487.5	0.06401	0.008029	5	0.07565	0.007544	5
	-486.25	0.06391	0.008163	5	0.074731	0.0073	5
	-485	0.063959	0.008364	5	0.071474	0.008287	5
	-483.75	0.064477	0.008467	5	0.070737	0.008038	5
	-482.5	0.06456	0.008264	5	0.069311	0.008495	5
	-481.25	0.064166	0.007983	5	0.069204	0.008488	5
	-480	0.063886	0.007651	5	0.070538	0.008641	5
	-478.75	0.066601	0.008198	5	0.070829	0.008829	5
	-477.5	0.067294	0.008045	5	0.070289	0.00903	5
	-476.25	0.06772	0.007976	5	0.070037	0.008477	5
	-475	0.067852	0.007402	5	0.069883	0.008287	5
	-473.75	0.068698	0.007448	5	0.070635	0.008715	5
	-472.5	0.069281	0.007597	5	0.069509	0.009219	5
	-471.25	0.069357	0.007768	5	0.068772	0.009139	5
	-470	0.068573	0.007557	5	0.071177	0.009094	5
	-468.75	0.068423	0.007712	5	0.070527	0.009193	5
	-467.5	0.069526	0.008082	5	0.069863	0.009377	5
	-466.25	0.067931	0.008386	5	0.070181	0.008335	5
	-465	0.067955	0.008333	5	0.071506	0.008207	5
	-463.75	0.068683	0.008543	5	0.074032	0.008419	5
	-462.5	0.069673	0.008842	5	0.074774	0.008754	5
	-461.25	0.071692	0.009485	5	0.075829	0.009191	5
	-460	0.07214	0.009553	5	0.076763	0.009876	5
	-458.75	0.069947	0.010131	5	0.076802	0.010354	5
	-457.5	0.069013	0.010299	5	0.077513	0.009361	5
	-456.25	0.068511	0.0105	5	0.077705	0.008249	5
	-455	0.069233	0.010497	5	0.078006	0.007337	5
	-453.75	0.069958	0.010736	5	0.077543	0.006412	5
	-452.5	0.071097	0.010424	5	0.077371	0.006095	5
	-451.25	0.071945	0.010051	5	0.078813	0.0071	5
	-450	0.072943	0.010447	5	0.077238	0.006609	5
	-448.75	0.074103	0.01088	5	0.07776	0.006174	5
	-447.5	0.077023	0.011646	5	0.078539	0.005664	5
	-446.25	0.079361	0.012597	5	0.079379	0.004876	5
	-445	0.080165	0.012971	5	0.078042	0.004226	5
	-443.75	0.080403	0.012551	5	0.074753	0.002354	5
	-442.5	0.079239	0.012798	5	0.074502	0.002125	5
	-441.25	0.077458	0.012292	5	0.074529	0.002853	5
	-440	0.076611	0.012349	5	0.071993	0.003043	5
	-438.75	0.076324	0.012401	5	0.070359	0.002434	5
	-437.5	0.07627	0.012585	5	0.068017	0.003139	5
	-436.25	0.075809	0.012472	5	0.067206	0.00328	5
	-435	0.074699	0.012232	5	0.067011	0.003487	5
	-433.75	0.0743	0.012765	5	0.06777	0.002748	5
	-432.5	0.073039	0.013469	5	0.068335	0.002368	5
	-431.25	0.072215	0.014023	5	0.066863	0.001637	5
	-430	0.07281	0.014878	5	0.065442	0.001751	5
	-428.75	0.072369	0.014618	5	0.064756	0.002294	5
	-427.5	0.068646	0.014011	5	0.063839	0.002884	5
	-426.25	0.066729	0.012987	5	0.063045	0.004194	5
	-425	0.065488	0.012309	5	0.065206	0.005874	5
	-423.75	0.065977	0.013461	5	0.067098	0.006556	5
	-422.5	0.069417	0.015358	5	0.066838	0.006313	5
	-421.25	0.071013	0.016198	5	0.065728	0.006074	5
	-420	0.074421	0.016198	5	0.06546	0.006185	5
	-418.75	0.076942	0.016631	5	0.064918	0.006985	5
	-417.5	0.076861	0.016413	5	0.06532	0.007531	5
	-416.25	0.08019	0.017489	5	0.065088	0.008085	5
	-415	0.081975	0.017952	5	0.064532	0.007946	5
	-413.75	0.082056	0.017205	5	0.063624	0.009627	5
	-412.5	0.083389	0.017684	5	0.062793	0.010253	5
	-411.25	0.08522	0.01795	5	0.061427	0.010547	5
	-410	0.084023	0.017581	5	0.061307	0.011312	5
	-408.75	0.082987	0.017867	5	0.062347	0.011615	5
	-407.5	0.082902	0.017975	5	0.062715	0.011682	5
	-406.25	0.082642	0.018334	5	0.063011	0.011391	5
	-405	0.083782	0.019134	5	0.062008	0.010928	5
	-403.75	0.082805	0.018538	5	0.060967	0.010244	5
	-402.5	0.079974	0.017358	5	0.060262	0.00995	5
	-401.25	0.079092	0.016536	5	0.059745	0.009882	5
	-400	0.077641	0.014813	5	0.060075	0.009843	5
	-398.75	0.075723	0.013448	5	0.060145	0.009728	5
	-397.5	0.076965	0.013997	5	0.059927	0.009646	5
	-396.25	0.074732	0.012768	5	0.060211	0.009699	5
	-395	0.073725	0.012283	5	0.062319	0.009593	5
	-393.75	0.073215	0.012595	5	0.063196	0.008859	5
	-392.5	0.073145	0.012228	5	0.06367	0.008197	5
	-391.25	0.070069	0.01159	5	0.064293	0.00845	5
	-390	0.070248	0.011302	5	0.063829	0.008217	5
	-388.75	0.07186	0.012081	5	0.064144	0.008193	5
	-387.5	0.072955	0.013106	5	0.064762	0.008449	5
	-386.25	0.07496	0.013246	5	0.064421	0.008082	5
	-385	0.074429	0.012458	5	0.06362	0.008178	5
	-383.75	0.074161	0.012342	5	0.063148	0.008592	5
	-382.5	0.07386	0.012337	5	0.063433	0.008782	5
	-381.25	0.073775	0.012623	5	0.075831	0.015255	5
	-380	0.074458	0.012874	5	0.077164	0.01751	5
	-378.75	0.074664	0.012871	5	0.077599	0.017781	5
	-377.5	0.073663	0.012321	5	0.077689	0.01817	5
	-376.25	0.075888	0.013764	5	0.077734	0.018339	5
	-375	0.076768	0.013792	5	0.077077	0.018256	5
	-373.75	0.077001	0.014363	5	0.076064	0.01891	5
	-372.5	0.075353	0.013352	5	0.076318	0.019726	5
	-371.25	0.075038	0.013522	5	0.077791	0.020023	5
	-370	0.074638	0.014157	5	0.07957	0.020569	5
	-368.75	0.073923	0.013837	5	0.079512	0.020827	5
	-367.5	0.072007	0.012901	5	0.081674	0.019882	5
	-366.25	0.069079	0.01211	5	0.082405	0.019617	5
	-365	0.071119	0.014755	5	0.084308	0.019172	5
	-363.75	0.074331	0.017108	5	0.086879	0.018746	5
	-362.5	0.076023	0.01858	5	0.087874	0.018106	5
	-361.25	0.074564	0.018834	5	0.078296	0.011654	5
	-360	0.075029	0.018346	5	0.07601	0.009977	5
	-358.75	0.075839	0.019	5	0.076006	0.0095	5
	-357.5	0.075912	0.019338	5	0.076116	0.009345	5
	-356.25	0.075514	0.019394	5	0.075945	0.009103	5
	-355	0.078183	0.022215	5	0.075946	0.009196	5
	-353.75	0.080911	0.023728	5	0.074969	0.00893	5
	-352.5	0.085216	0.025433	5	0.073504	0.00888	5
	-351.25	0.087523	0.025971	5	0.071377	0.008387	5
	-350	0.089969	0.025541	5	0.069072	0.00696	5
	-348.75	0.092199	0.026121	5	0.068079	0.007013	5
	-347.5	0.095716	0.027909	5	0.065675	0.007887	5
	-346.25	0.099554	0.029271	5	0.06527	0.008856	5
	-345	0.101738	0.027798	5	0.066436	0.009674	5
	-343.75	0.102564	0.028064	5	0.064997	0.009953	5
	-342.5	0.103668	0.027539	5	0.06482	0.010324	5
	-341.25	0.107247	0.028674	5	0.065561	0.010584	5
	-340	0.108933	0.030424	5	0.065107	0.010626	5
	-338.75	0.111714	0.032669	5	0.065441	0.010664	5
	-337.5	0.114004	0.034109	5	0.065949	0.010256	5
	-336.25	0.114252	0.033801	5	0.066568	0.010019	5
	-335	0.112432	0.031407	5	0.066138	0.009496	5
	-333.75	0.110867	0.030139	5	0.067634	0.009566	5
	-332.5	0.108639	0.029457	5	0.070119	0.010591	5
	-331.25	0.10834	0.029742	5	0.070374	0.010671	5
	-330	0.107813	0.030415	5	0.070482	0.010931	5
	-328.75	0.108495	0.032188	5	0.070398	0.011244	5
	-327.5	0.106957	0.031603	5	0.070689	0.011332	5
	-326.25	0.105066	0.031057	5	0.071447	0.01167	5
	-325	0.102086	0.031426	5	0.068058	0.010997	5
	-323.75	0.100111	0.030992	5	0.066427	0.011301	5
	-322.5	0.100205	0.031143	5	0.064981	0.011355	5
	-321.25	0.099304	0.030027	5	0.063668	0.011516	5
	-320	0.097461	0.027989	5	0.062561	0.0113	5
	-318.75	0.094777	0.024289	5	0.063811	0.012652	5
	-317.5	0.093872	0.021801	5	0.062927	0.012492	5
	-316.25	0.093432	0.019987	5	0.062458	0.012692	5
	-315	0.09439	0.019415	5	0.06425	0.012777	5
	-313.75	0.094983	0.018509	5	0.065339	0.012248	5
	-312.5	0.095487	0.017703	5	0.063144	0.011563	5
	-311.25	0.097186	0.018315	5	0.063136	0.011192	5
	-310	0.097784	0.018992	5	0.063152	0.011184	5
	-308.75	0.096344	0.018227	5	0.063011	0.011749	5
	-307.5	0.095037	0.017694	5	0.063257	0.012095	5
	-306.25	0.094358	0.016582	5	0.062701	0.011456	5
	-305	0.094971	0.015942	5	0.063088	0.011438	5
	-303.75	0.094704	0.014843	5	0.064152	0.011889	5
	-302.5	0.093292	0.013596	5	0.064536	0.012308	5
	-301.25	0.094012	0.012931	5	0.06435	0.012561	5
	-300	0.093904	0.012956	5	0.06493	0.013034	5
	-298.75	0.094052	0.012864	5	0.06399	0.011396	5
	-297.5	0.09374	0.012772	5	0.064336	0.01103	5
	-296.25	0.094548	0.013294	5	0.063568	0.011036	5
	-295	0.09505	0.013337	5	0.062687	0.010757	5
	-293.75	0.095479	0.013676	5	0.060833	0.011659	5
	-292.5	0.094448	0.014127	5	0.0599	0.011986	5
	-291.25	0.092654	0.013714	5	0.059771	0.012063	5
	-290	0.089793	0.013485	5	0.060407	0.011624	5
	-288.75	0.088797	0.013405	5	0.059966	0.011712	5
	-287.5	0.092551	0.014192	5	0.058628	0.011385	5
	-286.25	0.095672	0.014531	5	0.057412	0.010947	5
	-285	0.097089	0.014492	5	0.05734	0.01151	5
	-283.75	0.096394	0.014451	5	0.056859	0.010881	5
	-282.5	0.095289	0.014607	5	0.057911	0.010369	5
	-281.25	0.0961	0.015467	5	0.058438	0.009604	5
	-280	0.097955	0.016373	5	0.05903	0.008937	5
	-278.75	0.101176	0.018755	5	0.059251	0.009605	5
	-277.5	0.104375	0.021162	5	0.058595	0.010146	5
	-276.25	0.105449	0.021821	5	0.058539	0.010228	5
	-275	0.105252	0.021904	5	0.057145	0.010388	5
	-273.75	0.108028	0.024123	5	0.057294	0.01038	5
	-272.5	0.111925	0.026986	5	0.058461	0.010309	5
	-271.25	0.113384	0.027656	5	0.059384	0.009848	5
	-270	0.114184	0.027892	5	0.06	0.009913	5
	-268.75	0.113175	0.02654	5	0.061054	0.010519	5
	-267.5	0.109699	0.025466	5	0.062846	0.011002	5
	-266.25	0.112479	0.02666	5	0.064512	0.011093	5
	-265	0.112652	0.028418	5	0.065605	0.010739	5
	-263.75	0.112457	0.028466	5	0.065757	0.010786	5
	-262.5	0.112978	0.028957	5	0.065154	0.010316	5
	-261.25	0.11045	0.02809	5	0.065592	0.010631	5
	-260	0.109092	0.027308	5	0.064969	0.011135	5
	-258.75	0.105461	0.025273	5	0.064234	0.01076	5
	-257.5	0.101016	0.023778	5	0.064808	0.010564	5
	-256.25	0.097328	0.023604	5	0.066542	0.009759	5
	-255	0.094772	0.023936	5	0.067852	0.009915	5
	-253.75	0.089193	0.021537	5	0.066691	0.009927	5
	-252.5	0.086144	0.017861	5	0.066523	0.010029	5
	-251.25	0.083262	0.016588	5	0.066459	0.010621	5
	-250	0.081025	0.016337	5	0.066218	0.010181	5
	-248.75	0.080148	0.016358	5	0.065604	0.009444	5
	-247.5	0.079955	0.016191	5	0.06667	0.008865	5
	-246.25	0.071269	0.012952	5	0.06673	0.008924	5
	-245	0.065963	0.009398	5	0.065597	0.00849	5
	-243.75	0.064545	0.009109	5	0.065406	0.009282	5
	-242.5	0.062661	0.008353	5	0.065427	0.009788	5
	-241.25	0.062905	0.008361	5	0.065833	0.009291	5
	-240	0.063465	0.008779	5	0.065595	0.008806	5
	-238.75	0.064236	0.008813	5	0.064583	0.009027	5
	-237.5	0.062876	0.008314	5	0.064708	0.010305	5
	-236.25	0.062238	0.008543	5	0.063759	0.010492	5
	-235	0.062348	0.008757	5	0.063245	0.010216	5
	-233.75	0.064888	0.008363	5	0.064318	0.010198	5
	-232.5	0.06333	0.008356	5	0.064435	0.009944	5
	-231.25	0.062314	0.007831	5	0.064242	0.009334	5
	-230	0.063882	0.007699	5	0.064433	0.010243	5
	-228.75	0.065803	0.007883	5	0.063363	0.01023	5
	-227.5	0.068155	0.008222	5	0.060983	0.009952	5
	-226.25	0.069861	0.007061	5	0.060005	0.010777	5
	-225	0.071855	0.006892	5	0.059152	0.011088	5
	-223.75	0.074056	0.007375	5	0.05796	0.010714	5
	-222.5	0.077085	0.008372	5	0.057135	0.010893	5
	-221.25	0.078603	0.008992	5	0.056415	0.011879	5
	-220	0.08061	0.010344	5	0.057492	0.012672	5
	-218.75	0.081811	0.011593	5	0.059318	0.014675	5
	-217.5	0.084814	0.01308	5	0.060375	0.013495	5
	-216.25	0.087051	0.014039	5	0.060919	0.013444	5
	-215	0.089122	0.01544	5	0.0614	0.01411	5
	-213.75	0.089669	0.016961	5	0.063729	0.01386	5
	-212.5	0.090779	0.020435	5	0.063719	0.013919	5
	-211.25	0.091801	0.021284	5	0.06448	0.014898	5
	-210	0.092837	0.023289	5	0.063985	0.015348	5
	-208.75	0.09225	0.024386	5	0.063987	0.015491	5
	-207.5	0.091298	0.025101	5	0.063828	0.015192	5
	-206.25	0.09208	0.028562	5	0.063101	0.014488	5
	-205	0.09117	0.029572	5	0.063036	0.01427	5
	-203.75	0.093886	0.032086	5	0.063273	0.013727	5
	-202.5	0.09375	0.033535	5	0.064052	0.013502	5
	-201.25	0.094235	0.033594	5	0.065102	0.012782	5
	-200	0.096278	0.031884	5	0.064741	0.012137	5
	-198.75	0.096261	0.031	5	0.063062	0.010359	5
	-197.5	0.094619	0.030273	5	0.06211	0.010648	5
	-196.25	0.093407	0.029724	5	0.061441	0.010704	5
	-195	0.091696	0.028626	5	0.061389	0.010048	5
	-193.75	0.090033	0.027879	5	0.062562	0.011195	5
	-192.5	0.086996	0.025249	5	0.062997	0.011351	5
	-191.25	0.085138	0.024501	5	0.061508	0.010925	5
	-190	0.082761	0.023164	5	0.06185	0.010362	5
	-188.75	0.081888	0.022415	5	0.061636	0.010548	5
	-187.5	0.081546	0.022172	5	0.062985	0.011295	5
	-186.25	0.078992	0.019075	5	0.064418	0.011506	5
	-185	0.079112	0.017704	5	0.065883	0.011934	5
	-183.75	0.075166	0.013039	5	0.067496	0.011991	5
	-182.5	0.073525	0.010417	5	0.067871	0.011605	5
	-181.25	0.0717	0.009567	5	0.067386	0.011264	5
	-180	0.067366	0.00924	5	0.06718	0.011063	5
	-178.75	0.066117	0.008967	5	0.067552	0.01092	5
	-177.5	0.065093	0.00888	5	0.067809	0.011264	5
	-176.25	0.064907	0.008592	5	0.068136	0.011008	5
	-175	0.065297	0.00878	5	0.067385	0.011109	5
	-173.75	0.065072	0.008801	5	0.065485	0.010296	5
	-172.5	0.066846	0.008991	5	0.065707	0.010121	5
	-171.25	0.067532	0.009	5	0.06621	0.010335	5
	-170	0.067487	0.008845	5	0.065277	0.01002	5
	-168.75	0.067993	0.008846	5	0.065664	0.009819	5
	-167.5	0.067677	0.008721	5	0.065331	0.009724	5
	-166.25	0.067403	0.008401	5	0.063935	0.009798	5
	-165	0.066595	0.00828	5	0.065882	0.010964	5
	-163.75	0.06521	0.007768	5	0.064622	0.011541	5
	-162.5	0.063092	0.007324	5	0.064271	0.012026	5
	-161.25	0.062507	0.007309	5	0.064338	0.013093	5
	-160	0.062523	0.007372	5	0.064214	0.013718	5
	-158.75	0.062248	0.00732	5	0.064413	0.013828	5
	-157.5	0.061508	0.007227	5	0.064153	0.014085	5
	-156.25	0.060238	0.006869	5	0.064105	0.014836	5
	-155	0.059426	0.006581	5	0.064939	0.015534	5
	-153.75	0.058529	0.006449	5	0.06403	0.014909	5
	-152.5	0.056274	0.006289	5	0.063529	0.014688	5
	-151.25	0.055169	0.00622	5	0.063358	0.014468	5
	-150	0.054304	0.00588	5	0.063372	0.014436	5
	-148.75	0.053409	0.005565	5	0.064	0.014561	5
	-147.5	0.052729	0.00595	5	0.064022	0.014149	5
	-146.25	0.052383	0.006358	5	0.06451	0.013926	5
	-145	0.051845	0.006602	5	0.061467	0.012398	5
	-143.75	0.052434	0.007266	5	0.06091	0.012116	5
	-142.5	0.051556	0.007898	5	0.061524	0.012599	5
	-141.25	0.051286	0.007963	5	0.060339	0.01221	5
	-140	0.05198	0.007963	5	0.060304	0.011957	5
	-138.75	0.053435	0.007917	5	0.061339	0.012135	5
	-137.5	0.055466	0.007466	5	0.062709	0.011287	5
	-136.25	0.056816	0.007611	5	0.063219	0.010822	5
	-135	0.057859	0.007565	5	0.063245	0.009725	5
	-133.75	0.057843	0.007444	5	0.063013	0.009272	5
	-132.5	0.058336	0.007239	5	0.06582	0.008062	5
	-131.25	0.058894	0.00737	5	0.066831	0.007471	5
	-130	0.059414	0.007357	5	0.067147	0.007344	5
	-128.75	0.060794	0.006593	5	0.066679	0.007979	5
	-127.5	0.062915	0.005553	5	0.067464	0.00863	5
	-126.25	0.067386	0.005727	5	0.067597	0.009519	5
	-125	0.069733	0.006847	5	0.069961	0.009632	5
	-123.75	0.070331	0.00794	5	0.071348	0.009528	5
	-122.5	0.072586	0.009068	5	0.070447	0.009486	5
	-121.25	0.075551	0.011073	5	0.071505	0.009849	5
	-120	0.076284	0.01211	5	0.071054	0.009889	5
	-118.75	0.076869	0.013088	5	0.069889	0.010911	5
	-117.5	0.079086	0.015506	5	0.069668	0.012213	5
	-116.25	0.082703	0.019319	5	0.06981	0.012701	5
	-115	0.082924	0.020449	5	0.070315	0.01252	5
	-113.75	0.084687	0.021545	5	0.071479	0.012638	5
	-112.5	0.085337	0.021694	5	0.069937	0.011554	5
	-111.25	0.085414	0.021578	5	0.068573	0.010982	5
	-110	0.086098	0.021432	5	0.067866	0.011274	5
	-108.75	0.086055	0.02132	5	0.068218	0.010964	5
	-107.5	0.084062	0.021811	5	0.067141	0.010574	5
	-106.25	0.080679	0.02136	5	0.066794	0.010529	5
	-105	0.079689	0.021124	5	0.065802	0.011281	5
	-103.75	0.08022	0.021156	5	0.064529	0.011588	5
	-102.5	0.080344	0.022187	5	0.0639	0.011279	5
	-101.25	0.080287	0.022991	5	0.062327	0.010497	5
	-100	0.080329	0.023117	5	0.062897	0.010284	5
	-98.75	0.080751	0.023994	5	0.062884	0.009524	5
	-97.5	0.083571	0.02539	5	0.065718	0.007946	5
	-96.25	0.081877	0.023014	5	0.06574	0.007527	5
	-95	0.081512	0.022138	5	0.064825	0.007714	5
	-93.75	0.082323	0.023196	5	0.063421	0.007537	5
	-92.5	0.083488	0.023337	5	0.065343	0.008416	5
	-91.25	0.084351	0.023655	5	0.066221	0.008915	5
	-90	0.083689	0.024367	5	0.070971	0.010375	5
	-88.75	0.083284	0.024921	5	0.074814	0.012741	5
	-87.5	0.084723	0.026226	5	0.075559	0.01332	5
	-86.25	0.086127	0.026723	5	0.076967	0.014126	5
	-85	0.086357	0.026444	5	0.07715	0.014537	5
	-83.75	0.084864	0.025865	5	0.076819	0.015011	5
	-82.5	0.083061	0.024363	5	0.076755	0.015475	5
	-81.25	0.08084	0.023198	5	0.076916	0.01564	5
	-80	0.079441	0.022773	5	0.082892	0.0188	5
	-78.75	0.078548	0.022545	5	0.082843	0.019562	5
	-77.5	0.074779	0.019359	5	0.081767	0.018547	5
	-76.25	0.074299	0.019676	5	0.081597	0.018815	5
	-75	0.075162	0.020267	5	0.081754	0.018885	5
	-73.75	0.072153	0.018044	5	0.082094	0.018587	5
	-72.5	0.069658	0.017703	5	0.080297	0.017743	5
	-71.25	0.069477	0.017859	5	0.080956	0.017885	5
	-70	0.070759	0.018219	5	0.07779	0.016878	5
	-68.75	0.071739	0.017734	5	0.07439	0.01468	5
	-67.5	0.071131	0.016112	5	0.073564	0.01519	5
	-66.25	0.070456	0.016783	5	0.072401	0.014897	5
	-65	0.069201	0.017189	5	0.070814	0.014481	5
	-63.75	0.070902	0.016972	5	0.071392	0.014315	5
	-62.5	0.071346	0.016926	5	0.071419	0.014129	5
	-61.25	0.071083	0.015982	5	0.072874	0.013874	5
	-60	0.072709	0.015642	5	0.06667	0.008977	5
	-58.75	0.072207	0.014252	5	0.066287	0.008722	5
	-57.5	0.071377	0.01395	5	0.06539	0.008483	5
	-56.25	0.072567	0.013808	5	0.064004	0.007839	5
	-55	0.072714	0.014309	5	0.063877	0.007758	5
	-53.75	0.073372	0.014107	5	0.063895	0.008277	5
	-52.5	0.073728	0.014367	5	0.099477	0.038064	5
	-51.25	0.073121	0.014081	5	0.10302	0.042723	5
	-50	0.071937	0.013309	5	0.102992	0.042799	5
	-48.75	0.070866	0.013728	5	0.103998	0.042492	5
	-47.5	0.07194	0.014886	5	0.104457	0.042592	5
	-46.25	0.072003	0.014805	5	0.104569	0.042595	5
	-45	0.073494	0.015579	5	0.105698	0.042728	5
	-43.75	0.073705	0.01675	5	0.10572	0.042676	5
	-42.5	0.073758	0.017535	5	0.106509	0.042511	5
	-41.25	0.074262	0.018099	5	0.105632	0.042573	5
	-40	0.073985	0.018681	5	0.125657	0.063448	5
	-38.75	0.077839	0.022919	5	0.129054	0.066351	5
	-37.5	0.078337	0.022974	5	0.129236	0.066468	5
	-36.25	0.076652	0.022415	5	0.130176	0.066305	5
	-35	0.077169	0.022296	5	0.131098	0.066143	5
	-33.75	0.07875	0.023473	5	0.131708	0.066321	5
	-32.5	0.07973	0.023602	5	0.117125	0.050518	5
	-31.25	0.080377	0.024817	5	0.12125	0.052584	5
	-30	0.081549	0.024659	5	0.126204	0.055911	5
	-28.75	0.081872	0.02429	5	0.128434	0.058624	5
	-27.5	0.08033	0.023522	5	0.127557	0.058608	5
	-26.25	0.080047	0.022666	5	0.127037	0.058802	5
	-25	0.079733	0.022234	5	0.126602	0.058681	5
	-23.75	0.07833	0.021621	5	0.125951	0.058895	5
	-22.5	0.077977	0.021466	5	0.125231	0.059083	5
	-21.25	0.077713	0.021856	5	0.125924	0.059157	5
	-20	0.077944	0.022045	5	0.104494	0.037446	5
	-18.75	0.076494	0.018189	5	0.101686	0.034877	5
	-17.5	0.081036	0.017906	5	0.102499	0.035355	5
	-16.25	0.081843	0.017734	5	0.104795	0.034907	5
	-15	0.081859	0.018245	5	0.104732	0.034554	5
	-13.75	0.081269	0.018242	5	0.104225	0.034205	5
	-12.5	0.080856	0.018305	5	0.103577	0.034009	5
	-11.25	0.080706	0.017791	5	0.116639	0.047938	5
	-10	0.079626	0.018052	5	0.118618	0.048947	5
	-8.75	0.07963	0.01834	5	0.115055	0.046115	5
	-7.5	0.079447	0.018303	5	0.115577	0.046295	5
	-6.25	0.079468	0.018986	5	0.116287	0.046085	5
	-5	0.081954	0.020651	5	0.116752	0.046015	5
	-3.75	0.085895	0.023714	5	0.118563	0.0457	5
	-2.5	0.087971	0.024135	5	0.119784	0.04542	5
	-1.25	0.089837	0.023897	5	0.120231	0.045025	5
	0	0.091787	0.024731	5	0.119197	0.044981	5
	1.25	0.091143	0.024667	5	0.11681	0.043249	5
	2.5	0.087407	0.025072	5	0.116617	0.043507	5
	3.75	0.086447	0.025687	5	0.114556	0.044091	5
	5	0.087688	0.026173	5	0.113998	0.044442	5
	6.25	0.092433	0.028764	5	0.114513	0.044212	5
	7.5	0.097241	0.030027	5	0.11595	0.044628	5
	8.75	0.098977	0.031173	5	0.091488	0.020886	5
	10	0.10102	0.032164	5	0.076515	0.012446	5
	11.25	0.101755	0.032648	5	0.077179	0.013147	5
	12.5	0.103945	0.033582	5	0.077904	0.013255	5
	13.75	0.104023	0.033842	5	0.077671	0.012767	5
	15	0.102619	0.032755	5	0.078873	0.012081	5
	16.25	0.09999	0.031226	5	0.082892	0.0157	5
	17.5	0.101294	0.030873	5	0.081859	0.016014	5
	18.75	0.100755	0.030263	5	0.08232	0.016634	5
	20	0.132142	0.054448	5	0.086178	0.016856	5
	21.25	0.134858	0.056994	5	0.087164	0.017692	5
	22.5	0.134593	0.056993	5	0.085868	0.016562	5
	23.75	0.134792	0.057047	5	0.085936	0.016841	5
	25	0.135732	0.055358	5	0.08589	0.016806	5
	26.25	0.13361	0.053892	5	0.085456	0.017125	5
	27.5	0.129409	0.054409	5	0.083361	0.016384	5
	28.75	0.127335	0.054572	5	0.081092	0.01656	5
	30	0.126402	0.054943	5	0.082271	0.016341	5
	31.25	0.12852	0.05717	5	0.081995	0.015378	5
	32.5	0.129149	0.056922	5	0.081479	0.014672	5
	33.75	0.129024	0.056987	5	0.081865	0.014283	5
	35	0.129217	0.05755	5	0.081117	0.013802	5
	36.25	0.129847	0.057894	5	0.07501	0.008763	5
	37.5	0.129021	0.057936	5	0.074914	0.008596	5
	38.75	0.129034	0.057974	5	0.073422	0.008285	5
	40	0.102873	0.031338	5	0.070365	0.007682	5
	41.25	0.107042	0.035821	5	0.069677	0.007166	5
	42.5	0.109381	0.037943	5	0.069411	0.007267	5
	43.75	0.110368	0.037814	5	0.070378	0.008434	5
	45	0.11079	0.037982	5	0.071147	0.008344	5
	46.25	0.110029	0.038218	5	0.072148	0.009367	5
	47.5	0.109618	0.037827	5	0.072824	0.009595	5
	48.75	0.109517	0.03765	5	0.073538	0.009729	5
	50	0.110134	0.037853	5	0.080323	0.010665	5
	51.25	0.109269	0.035569	5	0.084139	0.011859	5
	52.5	0.108852	0.036628	5	0.087557	0.013673	5
	53.75	0.109727	0.037152	5	0.09272	0.016638	5
	55	0.109314	0.03681	5	0.09497	0.018359	5
	56.25	0.110755	0.03669	5	0.107364	0.027987	5
	57.5	0.134377	0.058629	5	0.108359	0.028211	5
	58.75	0.139795	0.062578	5	0.148459	0.036127	5
	60	0.139969	0.062045	5	0.152225	0.038478	5
	61.25	0.137801	0.056461	5	0.157904	0.040513	5
	62.5	0.138987	0.056622	5	0.168725	0.046598	5
	63.75	0.142306	0.059958	5	0.174726	0.051302	5
	65	0.144366	0.061439	5	0.17891	0.055435	5
	66.25	0.155233	0.060854	5	0.181162	0.05872	5
	67.5	0.163903	0.0634	5	0.182524	0.060366	5
	68.75	0.168692	0.064348	5	0.183942	0.061535	5
	70	0.175911	0.066367	5	0.191427	0.069162	5
	71.25	0.208029	0.079614	5	0.192212	0.070864	5
	72.5	0.214254	0.081462	5	0.194151	0.071024	5
	73.75	0.223825	0.083025	5	0.193904	0.071342	5
	75	0.228629	0.083455	5	0.194608	0.072337	5
	76.25	0.233917	0.084313	5	0.191799	0.069982	5
	77.5	0.235132	0.069189	5	0.193702	0.071599	5
	78.75	0.238922	0.067051	5	0.168089	0.072518	5
	80	0.250709	0.068571	5	0.166862	0.076131	5
	81.25	0.260791	0.068231	5	0.175261	0.076207	5
	82.5	0.271665	0.068377	5	0.179614	0.074189	5
	83.75	0.272207	0.066644	5	0.182987	0.075058	5
	85	0.274622	0.066865	5	0.186765	0.078518	5
	86.25	0.27174	0.071399	5	0.185623	0.07796	5
	87.5	0.267796	0.071441	5	0.191523	0.080486	5
	88.75	0.267775	0.071904	5	0.196746	0.082503	5
	90	0.264599	0.070591	5	0.191764	0.078408	5
	91.25	0.237142	0.060777	5	0.203193	0.085302	5
	92.5	0.229752	0.062431	5	0.205177	0.08661	5
	93.75	0.223377	0.063166	5	0.211107	0.089173	5
	95	0.222281	0.064272	5	0.214419	0.090945	5
	96.25	0.220398	0.064678	5	0.229532	0.101052	5
	97.5	0.216797	0.062564	5	0.243352	0.111923	5
	98.75	0.215571	0.061497	5	0.247585	0.115794	5
	100	0.208647	0.05984	5	0.256419	0.124285	5
	101.25	0.202538	0.055701	5	0.260447	0.129651	5
	102.5	0.194428	0.050796	5	0.26165	0.135058	5
	103.75	0.199589	0.050139	5	0.263536	0.141182	5
	105	0.199928	0.048432	5	0.262759	0.150108	5
	106.25	0.194097	0.046507	5	0.270296	0.159954	5
	107.5	0.194021	0.045073	5	0.270316	0.170017	5
	108.75	0.190903	0.043295	5	0.276849	0.179412	5
	110	0.200836	0.04139	5	0.284266	0.190255	5
	111.25	0.203641	0.040922	5	0.291087	0.19667	5
	112.5	0.214831	0.0452	5	0.29481	0.20881	5
	113.75	0.211551	0.044227	5	0.330267	0.215693	5
	115	0.20809	0.042417	5	0.337257	0.225679	5
	116.25	0.203043	0.040698	5	0.342113	0.229186	5
	117.5	0.196547	0.039847	5	0.344508	0.231163	5
	118.75	0.190044	0.039895	5	0.350182	0.236316	5
	120	0.182787	0.040082	5	0.384673	0.223671	5
	121.25	0.179996	0.041467	5	0.38976	0.217849	5
	122.5	0.173694	0.043873	5	0.418314	0.211573	5
	123.75	0.163599	0.044038	5	0.488	0.222629	5
	125	0.160204	0.042396	5	0.493675	0.221662	5
	126.25	0.160702	0.040753	5	0.531211	0.239603	5
	127.5	0.161949	0.038906	5	0.560344	0.257605	5
	128.75	0.162279	0.038648	5	0.58078	0.274188	5
	130	0.171353	0.037857	5	0.590673	0.287292	5
	131.25	0.16835	0.036419	5	0.595758	0.299509	5
	132.5	0.151134	0.037813	5	0.596387	0.310381	5
	133.75	0.166994	0.059487	5	0.569286	0.326273	5
	135	0.173684	0.067259	5	0.56272	0.334375	5
	136.25	0.183797	0.075202	5	0.548618	0.341392	5
	137.5	0.188514	0.076238	5	0.531772	0.351222	5
	138.75	0.187986	0.077173	5	0.511827	0.365674	5
	140	0.188428	0.078355	5	0.506054	0.379725	5
	141.25	0.185227	0.079985	5	0.511045	0.393807	5
	142.5	0.181963	0.081504	5	0.5219	0.404033	5
	143.75	0.179102	0.082577	5	0.516908	0.399672	5
	145	0.17611	0.083454	5	0.53511	0.414061	5
	146.25	0.173403	0.084306	5	0.537478	0.41411	5
	147.5	0.170308	0.084584	5	0.537152	0.415915	5
	148.75	0.16824	0.085196	5	0.538831	0.418755	5
	150	0.159192	0.078228	5	0.546648	0.425087	5
	151.25	0.157118	0.077819	5	0.551962	0.430653	5
	152.5	0.151746	0.075857	5	0.556579	0.434531	5
	153.75	0.141343	0.066451	5	0.549698	0.429956	5
	155	0.134848	0.059477	5	0.541218	0.423067	5
	156.25	0.122639	0.051854	5	0.534387	0.416797	5
	157.5	0.123094	0.0539	5	0.52739	0.409701	5
	158.75	0.12332	0.054895	5	0.51741	0.403888	5
	160	0.127044	0.051912	5	0.50306	0.39867	5
	161.25	0.131052	0.049323	5	0.488115	0.386324	5
	162.5	0.131985	0.047668	5	0.469414	0.36991	5
	163.75	0.132975	0.046552	5	0.449731	0.349526	5
	165	0.133034	0.04602	5	0.420179	0.327016	5
	166.25	0.13222	0.045823	5	0.388915	0.300497	5
	167.5	0.131718	0.045709	5	0.357713	0.270639	5
	168.75	0.131631	0.045749	5	0.328179	0.239416	5
	170	0.131724	0.045351	5	0.289983	0.200594	5
	171.25	0.130548	0.045093	5	0.251474	0.161501	5
	172.5	0.130153	0.045465	5	0.214159	0.125206	5
	173.75	0.117436	0.035228	5	0.198856	0.109197	5
	175	0.114206	0.033431	5	0.192849	0.103653	5
	176.25	0.110877	0.030181	5	0.192772	0.103228	5
	177.5	0.100454	0.024364	5	0.191595	0.102752	5
	178.75	0.094734	0.022417	5	0.176051	0.092133	5
	180	0.090831	0.022258	5	0.152105	0.069172	5
	181.25	0.086698	0.023056	5	0.15046	0.067211	5
	182.5	0.084997	0.025091	5	0.150329	0.0669	5
	183.75	0.085397	0.0263	5	0.149908	0.06729	5
	185	0.086412	0.025205	5	0.149676	0.06762	5
	186.25	0.08702	0.024611	5	0.147834	0.068831	5
	187.5	0.086903	0.023627	5	0.146954	0.069	5
	188.75	0.086336	0.022386	5	0.136939	0.060967	5
	190	0.085633	0.021575	5	0.132217	0.058555	5
	191.25	0.084078	0.02041	5	0.12241	0.048758	5
	192.5	0.08507	0.01859	5	0.098614	0.025725	5
	193.75	0.086423	0.017311	5	0.088232	0.016279	5
	195	0.084741	0.016026	5	0.085225	0.0157	5
	196.25	0.082378	0.014387	5	0.084724	0.014805	5
	197.5	0.082261	0.013874	5	0.08618	0.014203	5
	198.75	0.083034	0.013869	5	0.086252	0.014692	5
	200	0.080848	0.013122	5	0.085166	0.013787	5
	201.25	0.07876	0.012767	5	0.099792	0.027826	5
	202.5	0.075866	0.01335	5	0.104017	0.031609	5
	203.75	0.07109	0.014368	5	0.105283	0.032095	5
	205	0.068821	0.01465	5	0.104866	0.032222	5
	206.25	0.066399	0.013851	5	0.109927	0.036001	5
	207.5	0.064438	0.014163	5	0.114585	0.040775	5
	208.75	0.063588	0.013728	5	0.113983	0.04173	5
	210	0.063704	0.0136	5	0.116288	0.042414	5
	211.25	0.06386	0.01358	5	0.116246	0.04256	5
	212.5	0.063464	0.013065	5	0.116203	0.042701	5
	213.75	0.061924	0.012643	5	0.11556	0.043108	5
	215	0.062184	0.012581	5	0.115234	0.043653	5
	216.25	0.061914	0.012665	5	0.114999	0.04404	5
	217.5	0.060001	0.012083	5	0.113154	0.044218	5
	218.75	0.058455	0.011729	5	0.11397	0.04375	5
	220	0.057818	0.011044	5	0.114448	0.043619	5
	221.25	0.057578	0.010879	5	0.113396	0.042338	5
	222.5	0.057769	0.011232	5	0.130609	0.058792	5
	223.75	0.057707	0.011372	5	0.134209	0.062804	5
	225	0.058998	0.012044	5	0.136377	0.06489	5
	226.25	0.059351	0.012326	5	0.133575	0.061658	5
	227.5	0.059331	0.012605	5	0.131895	0.057776	5
	228.75	0.057594	0.012956	5	0.132167	0.057013	5
	230	0.056678	0.013055	5	0.13059	0.056249	5
	231.25	0.055752	0.013615	5	0.129934	0.056053	5
	232.5	0.05323	0.013365	5	0.130388	0.05605	5
	233.75	0.05202	0.013669	5	0.131017	0.055732	5
	235	0.049807	0.015544	5	0.131406	0.055768	5
	236.25	0.04872	0.015483	5	0.140659	0.065032	5
	237.5	0.04838	0.015422	5	0.143442	0.068058	5
	238.75	0.047853	0.015024	5	0.145077	0.070035	5
	240	0.047634	0.015317	5	0.146904	0.072165	5
	241.25	0.047615	0.015454	5	0.144879	0.070297	5
	242.5	0.046363	0.014676	5	0.127358	0.053365	5
	243.75	0.045571	0.014377	5	0.121846	0.048145	5
	245	0.043311	0.013441	5	0.119351	0.045389	5
	246.25	0.042371	0.013084	5	0.118495	0.045482	5
	247.5	0.041438	0.012733	5	0.11723	0.046046	5
	248.75	0.040675	0.012342	5	0.116669	0.046775	5
	250	0.039303	0.012057	5	0.130372	0.06119	5
	251.25	0.038559	0.011924	5	0.139665	0.070682	5
	252.5	0.038476	0.011913	5	0.176657	0.10811	5
	253.75	0.037988	0.011508	5	0.184658	0.118168	5
	255	0.03608	0.01051	5	0.195901	0.129399	5
	256.25	0.035382	0.010061	5	0.191507	0.126323	5
	257.5	0.034745	0.009743	5	0.190531	0.12667	5
	258.75	0.034005	0.009421	5	0.189963	0.126778	5
	260	0.032999	0.009018	5	0.191034	0.127377	5
	261.25	0.032581	0.008805	5	0.193682	0.128384	5
	262.5	0.032157	0.008591	5	0.196626	0.131328	5
	263.75	0.031456	0.008359	5	0.236659	0.147578	5
	265	0.031507	0.008308	5	0.244451	0.155	5
	266.25	0.031116	0.008128	5	0.24753	0.157942	5
	267.5	0.031002	0.008055	5	0.260537	0.170605	5
	268.75	0.030599	0.007898	5	0.281297	0.190628	5
	270	0.03038	0.007818	5	0.282653	0.192829	5
	271.25	0.030139	0.007787	5	0.293767	0.20451	5
	272.5	0.029593	0.007564	5	0.289293	0.19833	5
	273.75	0.029178	0.007539	5	0.288181	0.194333	5
	275	0.029285	0.007658	5	0.287167	0.193794	5
	276.25	0.028745	0.007451	5	0.286543	0.193507	5
	277.5	0.028513	0.00745	5	0.285898	0.192609	5
	278.75	0.028386	0.007576	5	0.285928	0.193915	5
	280	0.02906	0.007798	5	0.283784	0.193839	5
	281.25	0.029105	0.007822	5	0.283977	0.196742	5
	282.5	0.028864	0.007888	5	0.281626	0.196117	5
	283.75	0.028952	0.007829	5	0.256918	0.194745	5
	285	0.028657	0.007813	5	0.253788	0.193878	5
	286.25	0.02857	0.007784	5	0.253782	0.195122	5
	287.5	0.028063	0.00783	5	0.244421	0.187019	5
	288.75	0.028185	0.007819	5	0.224614	0.16775	5
	290	0.028043	0.007701	5	0.218922	0.162395	5
	291.25	0.027952	0.007672	5	0.211695	0.154557	5
	292.5	0.027829	0.00769	5	0.225424	0.170583	5
	293.75	0.027925	0.007627	5	0.22697	0.176295	5
	295	0.027224	0.007323	5	0.222119	0.171977	5
	296.25	0.027223	0.007388	5	0.22402	0.174494	5
	297.5	0.027084	0.007377	5	0.223127	0.175794	5
	298.75	0.027352	0.007383	5	0.221081	0.174167	5
	300	0.026613	0.007162	5	0.220683	0.174119	5
	301.25	0.026318	0.007027	5	0.218771	0.172172	5
	302.5	0.026248	0.006898	5	0.217612	0.171328	5
	303.75	0.026176	0.00692	5	0.21218	0.166696	5
	305	0.025976	0.00683	5	0.20689	0.161793	5
	306.25	0.025941	0.006796	5	0.20543	0.16026	5
	307.5	0.025909	0.00675	5	0.201022	0.156468	5
	308.75	0.025958	0.006752	5	0.197847	0.154345	5
	310	0.025621	0.00658	5	0.194214	0.151863	5
	311.25	0.025174	0.006462	5	0.180695	0.139282	5
	312.5	0.02517	0.006388	5	0.13813	0.097544	5
	313.75	0.02477	0.006375	5	0.123148	0.083544	5
	315	0.025184	0.006543	5	0.115722	0.076429	5
	316.25	0.024832	0.00634	5	0.107737	0.068882	5
	317.5	0.024946	0.00632	5	0.104379	0.065875	5
	318.75	0.024707	0.006216	5	0.102815	0.065215	5
	320	0.024914	0.006213	5	0.100611	0.063229	5
	321.25	0.024642	0.00624	5	0.090802	0.05412	5
	322.5	0.02427	0.006217	5	0.089518	0.053169	5
	323.75	0.023903	0.006017	5	0.065242	0.029125	5
	325	0.023519	0.005765	5	0.060948	0.02484	5
	326.25	0.023305	0.005767	5	0.03388	0.007089	5
	327.5	0.022865	0.005522	5	0.033709	0.007004	5
	328.75	0.022291	0.005365	5	0.033997	0.006767	5
	330	0.022213	0.00528	5	0.03427	0.006818	5
	331.25	0.022083	0.005151	5	0.034091	0.006742	5
	332.5	0.02235	0.005239	5	0.034283	0.006793	5
	333.75	0.022256	0.005085	5	0.034442	0.007057	5
	335	0.021794	0.004823	5	0.034402	0.006964	5
	336.25	0.022049	0.004931	5	0.034439	0.007008	5
	337.5	0.02214	0.004974	5	0.034485	0.007046	5
	338.75	0.021857	0.004937	5	0.034072	0.007088	5
	340	0.021425	0.00478	5	0.034105	0.006753	5
	341.25	0.021112	0.004639	5	0.034264	0.006694	5
	342.5	0.020825	0.004529	5	0.034268	0.006698	5
	343.75	0.020744	0.004626	5	0.035029	0.006485	5
	345	0.020978	0.004761	5	0.034758	0.006325	5
	346.25	0.020876	0.00474	5	0.034769	0.006441	5
	347.5	0.021377	0.004889	5	0.039994	0.007948	5
	348.75	0.021213	0.004862	5	0.045667	0.012007	5
	350	0.020938	0.004798	5	0.0457	0.012288	5
	351.25	0.020716	0.004729	5	0.050468	0.016897	5
	352.5	0.020172	0.004648	5	0.058838	0.024607	5
	353.75	0.020022	0.004635	5	0.058673	0.024625	5
	355	0.019936	0.004622	5	0.063276	0.029492	5
	356.25	0.01963	0.004514	5	0.064984	0.031687	5
	357.5	0.019131	0.004369	5	0.064768	0.031786	5
	358.75	0.018641	0.004099	5	0.064704	0.031897	5
	360	0.01852	0.004087	5	0.067471	0.034157	5
	361.25	0.018726	0.004149	5	0.087198	0.053285	5
	362.5	0.018676	0.004123	5	0.090665	0.056591	5
	363.75	0.018369	0.00401	5	0.090989	0.056707	5
	365	0.017939	0.003928	5	0.090978	0.056832	5
	366.25	0.018009	0.003883	5	0.093233	0.059218	5
	367.5	0.016978	0.003711	5	0.097324	0.063471	5
	368.75	0.016686	0.003538	5	0.096077	0.062878	5
	370	0.017012	0.003685	5	0.099413	0.066451	5
	371.25	0.016935	0.003692	5	0.100868	0.067517	5
	372.5	0.016864	0.003602	5	0.097335	0.064698	5
	373.75	0.016799	0.003698	5	0.09974	0.067246	5
	375	0.016893	0.003664	5	0.098958	0.0667	5
	376.25	0.016717	0.003662	5	0.098103	0.065599	5
	377.5	0.016622	0.003656	5	0.099799	0.067152	5
	378.75	0.016686	0.003756	5	0.100674	0.068235	5
	380	0.016599	0.003668	5	0.09906	0.067207	5
	381.25	0.016525	0.003736	5	0.086396	0.055189	5
	382.5	0.016773	0.003726	5	0.082786	0.052011	5
	383.75	0.016663	0.003642	5	0.08229	0.051876	5
	385	0.01681	0.003726	5	0.083477	0.052908	5
	386.25	0.016609	0.003744	5	0.08055	0.050346	5
	387.5	0.01673	0.003728	5	0.074703	0.044673	5
	388.75	0.016642	0.003719	5	0.0766	0.046347	5
	390	0.016149	0.003618	5	0.071371	0.041241	5
	391.25	0.016348	0.003681	5	0.067206	0.037464	5
	392.5	0.016105	0.003601	5	0.069768	0.03989	5
	393.75	0.01628	0.00338	5	0.06587	0.036244	5
	395	0.01602	0.00341	5	0.063553	0.033949	5
	396.25	0.016146	0.003486	5	0.065039	0.035587	5
	397.5	0.016178	0.003357	5	0.061948	0.032812	5
	398.75	0.015801	0.003327	5	0.05993	0.030657	5
	400	0.016333	0.003452	5	0.060647	0.03156	5
	401.25	0.016149	0.003251	5	0.057977	0.029049	5
	402.5	0.015962	0.003219	5	0.057516	0.028686	5
	403.75	0.016002	0.003295	5	0.05889	0.030145	5
	405	0.015815	0.003182	5	0.057454	0.029138	5
	406.25	0.015674	0.003191	5	0.057451	0.029001	5
	407.5	0.015514	0.003152	5	0.057581	0.029349	5
	408.75	0.015502	0.003167	5	0.0557	0.027832	5
	410	0.015241	0.003196	5	0.055673	0.027763	5
	411.25	0.015042	0.002968	5	0.055022	0.02749	5
	412.5	0.015098	0.002886	5	0.052601	0.025129	5
	413.75	0.015075	0.003028	5	0.053744	0.0263	5
	415	0.015372	0.00314	5	0.053104	0.025701	5
	416.25	0.015512	0.003107	5	0.050644	0.023569	5
	417.5	0.015548	0.003304	5	0.052316	0.025197	5
	418.75	0.015694	0.003201	5	0.053324	0.02589	5
	420	0.014876	0.003049	5	0.052052	0.024492	5
	421.25	0.014582	0.00302	5	0.049764	0.022529	5
	422.5	0.014419	0.003022	5	0.050664	0.023495	5
	423.75	0.014357	0.002892	5	0.048949	0.021864	5
	425	0.014487	0.002777	5	0.047898	0.020672	5
	426.25	0.014319	0.002583	5	0.048047	0.020781	5
	427.5	0.014358	0.002591	5	0.047208	0.019864	5
	428.75	0.014857	0.002776	5	0.044742	0.017553	5
	430	0.015196	0.002788	5	0.044592	0.017612	5
	431.25	0.015039	0.002789	5	0.044574	0.017595	5
	432.5	0.014918	0.002791	5	0.042827	0.016126	5
	433.75	0.014324	0.002623	5	0.040597	0.013872	5
	435	0.013727	0.002411	5	0.040385	0.013686	5
	436.25	0.013398	0.002303	5	0.040525	0.013526	5
	437.5	0.013286	0.002167	5	0.037114	0.010606	5
	438.75	0.013461	0.002418	5	0.068546	0.041855	5
	440	0.013565	0.002426	5	0.096245	0.069767	5
	441.25	0.013895	0.002534	5	0.098924	0.072365	5
	442.5	0.013916	0.002433	5	0.101929	0.075047	5
	443.75	0.014205	0.002396	5	0.102012	0.075127	5
	445	0.014205	0.00245	5	0.101717	0.075241	5
	446.25	0.014382	0.002552	5	0.101609	0.07523	5
	447.5	0.014343	0.002549	5	0.101334	0.075034	5
	448.75	0.01433	0.002362	5	0.101447	0.074884	5
	450	0.013941	0.00224	5	0.101542	0.074857	5
	451.25	0.013785	0.002229	5	0.101568	0.07485	5
	452.5	0.013892	0.002245	5	0.101443	0.074826	5
	453.75	0.014199	0.002452	5	0.101252	0.074686	5
	455	0.014481	0.002537	5	0.101221	0.074641	5
	456.25	0.01437	0.002495	5	0.100924	0.074708	5
	457.5	0.014133	0.002333	5	0.101063	0.074678	5
	458.75	0.013675	0.002051	5	0.087307	0.060736	5
	460	0.013687	0.002098	5	0.051782	0.025681	5
	461.25	0.013394	0.002061	5	0.044412	0.018239	5
	462.5	0.013685	0.002221	5	0.027341	0.004688	5
	463.75	0.01382	0.002301	5	0.024301	0.004845	5
	465	0.013504	0.002231	5	0.023517	0.005156	5
	466.25	0.013326	0.002182	5	0.023396	0.005257	5
	467.5	0.013413	0.002189	5	0.023633	0.005247	5
	468.75	0.012938	0.002277	5	0.023411	0.005014	5
	470	0.012742	0.002235	5	0.023159	0.004863	5
	471.25	0.012827	0.002191	5	0.023343	0.004961	5
	472.5	0.012855	0.002251	5	0.023216	0.005036	5
	473.75	0.013228	0.002168	5	0.023014	0.005036	5
	475	0.0131	0.002126	5	0.023028	0.005097	5
	476.25	0.013227	0.002133	5	0.023245	0.005131	5
	477.5	0.013361	0.002161	5	0.022986	0.004994	5
	478.75	0.013462	0.002194	5	0.022949	0.004949	5
	480	0.013391	0.002111	5	0.023019	0.005028	5
	481.25	0.013401	0.002028	5	0.022884	0.0049	5
	482.5	0.012891	0.001903	5	0.022846	0.004776	5
	483.75	0.0123	0.001797	5	0.022098	0.005125	5
	485	0.01253	0.00197	5	0.02225	0.005129	5
	486.25	0.012643	0.001958	5	0.022172	0.005009	5
	487.5	0.012581	0.001903	5	0.021521	0.004857	5
	488.75	0.012505	0.001837	5	0.021435	0.004914	5
	490	0.012584	0.001822	5	0.021704	0.005069	5
	491.25	0.012561	0.001871	5	0.021428	0.005053	5
	492.5	0.012379	0.001783	5	0.021363	0.005012	5
	493.75	0.012023	0.001596	5	0.021243	0.004969	5
	495	0.012427	0.001422	5	0.021405	0.004901	5
	496.25	0.012337	0.001418	5	0.021246	0.004808	5
	497.5	0.012334	0.00147	5	0.021655	0.005061	5
	498.75	0.012534	0.001563	5	0.02177	0.005217	5
	500	0.012698	0.00172	5	0.022023	0.005222	5
	501.25	0.012586	0.001756	5	0.021705	0.005136	5
	502.5	0.012938	0.001782	5	0.022115	0.005114	5
	503.75	0.013353	0.001907	5	0.022219	0.005267	5
	505	0.013081	0.001746	5	0.021957	0.00531	5
	506.25	0.012997	0.00172	5	0.022113	0.005296	5
	507.5	0.013401	0.001876	5	0.022408	0.005398	5
	508.75	0.013339	0.001841	5	0.022697	0.00552	5
	510	0.013299	0.001893	5	0.022444	0.005367	5
	511.25	0.013194	0.001893	5	0.022722	0.005525	5
	512.5	0.01325	0.001896	5	0.023081	0.005608	5
	513.75	0.013189	0.001902	5	0.023192	0.005741	5
	515	0.01275	0.001851	5	0.022873	0.005786	5
	516.25	0.012873	0.001905	5	0.02297	0.005838	5
	517.5	0.013064	0.001855	5	0.022804	0.005624	5
	518.75	0.012917	0.001707	5	0.022606	0.005456	5
	520	0.012851	0.001621	5	0.022518	0.005532	5
	521.25	0.012931	0.001612	5	0.02271	0.005674	5
	522.5	0.012808	0.001629	5	0.022419	0.005733	5
	523.75	0.012335	0.001425	5	0.022365	0.005761	5
	525	0.012457	0.001563	5	0.022912	0.0058	5
	526.25	0.012371	0.001598	5	0.022815	0.005721	5
	527.5	0.012102	0.001598	5	0.022618	0.005634	5
	528.75	0.012379	0.001675	5	0.022491	0.005515	5
	530	0.012449	0.001688	5	0.02275	0.005647	5
	531.25	0.012478	0.001717	5	0.022467	0.005483	5
	532.5	0.012381	0.001721	5	0.022066	0.005416	5
	533.75	0.012227	0.00158	5	0.022384	0.005549	5
	535	0.012137	0.001542	5	0.022535	0.005558	5
	536.25	0.011991	0.00147	5	0.022593	0.005627	5
	537.5	0.011745	0.001458	5	0.022439	0.005651	5
	538.75	0.011654	0.001493	5	0.022608	0.005798	5
	540	0.011619	0.001465	5	0.022505	0.005687	5
	541.25	0.011528	0.001413	5	0.022366	0.005532	5
	542.5	0.011293	0.001647	5	0.022309	0.005598	5
	543.75	0.01193	0.001693	5	0.022365	0.00559	5
	545	0.012116	0.001515	5	0.022035	0.005618	5
	546.25	0.012125	0.001467	5	0.021961	0.005795	5
	547.5	0.011989	0.001324	5	0.022186	0.005856	5
	548.75	0.011825	0.001327	5	0.022329	0.005994	5
	550	0.011753	0.001364	5	0.022369	0.00602	5
	551.25	0.012029	0.001461	5	0.022711	0.006025	5
	552.5	0.012137	0.001536	5	0.02291	0.006015	5
	553.75	0.012082	0.001536	5	0.022509	0.005867	5
	555	0.012195	0.001545	5	0.022409	0.005884	5
	556.25	0.012458	0.001588	5	0.022251	0.005893	5
	557.5	0.012446	0.001572	5	0.022198	0.005872	5
	558.75	0.012371	0.001582	5	0.022182	0.005887	5
	560	0.012342	0.001593	5	0.022292	0.006021	5
	561.25	0.012264	0.001592	5	0.022292	0.006165	5
	562.5	0.012043	0.001499	5	0.022224	0.00606	5
	563.75	0.011504	0.001339	5	0.022187	0.006052	5
	565	0.011352	0.001676	5	0.02202	0.005966	5
	566.25	0.01156	0.001845	5	0.021955	0.005994	5
	567.5	0.0114	0.001929	5	0.022084	0.006104	5
	568.75	0.011289	0.00184	5	0.021835	0.005964	5
	570	0.011858	0.001764	5	0.021861	0.005823	5
	571.25	0.011761	0.001675	5	0.021479	0.005716	5
	572.5	0.011815	0.001684	5	0.021371	0.005712	5
	573.75	0.011815	0.001708	5	0.021563	0.005714	5
	575	0.011766	0.001693	5	0.021795	0.00584	5
	576.25	0.011386	0.001631	5	0.021752	0.00575	5
	577.5	0.011226	0.001566	5	0.022008	0.005852	5
	578.75	0.01156	0.001486	5	0.021666	0.00567	5
	580	0.011651	0.00147	5	0.02156	0.005524	5
	581.25	0.011845	0.001502	5	0.02174	0.005617	5
	582.5	0.012359	0.001598	5	0.022014	0.005752	5
	583.75	0.012351	0.001659	5	0.022131	0.005877	5
	585	0.012216	0.001473	5	0.022191	0.005956	5
	586.25	0.012045	0.001362	5	0.022203	0.005758	5
	587.5	0.011994	0.001329	5	0.022105	0.00564	5
	588.75	0.012137	0.001407	5	0.022232	0.005714	5
	590	0.01168	0.001386	5	0.021903	0.005795	5
	591.25	0.011887	0.001364	5	0.022176	0.005972	5
	592.5	0.011774	0.001255	5	0.022389	0.00605	5
	593.75	0.011983	0.001296	5	0.022625	0.006112	5
	595	0.011961	0.001306	5	0.022826	0.006147	5
	596.25	0.012003	0.001334	5	0.022728	0.006198	5
	597.5	0.012113	0.001405	5	0.022544	0.006152	5
	598.75	0.011861	0.001384	5	0.022777	0.006224	5
	600	0.011846	0.001419	5	0.022688	0.006201	5
	601.25	0.011668	0.001434	5	0.022553	0.006095	5
	602.5	0.011364	0.001322	5	0.022189	0.005994	5
	603.75	0.011528	0.001464	5	0.022264	0.005887	5
	605	0.011575	0.001533	5	0.022585	0.005874	5
	606.25	0.011589	0.001533	5	0.022367	0.005879	5
	607.5	0.011665	0.001502	5	0.02216	0.005775	5
	608.75	0.011377	0.001494	5	0.022132	0.005713	5
	610	0.011499	0.001428	5	0.022378	0.005815	5
	611.25	0.011445	0.001956	5	0.02221	0.005683	5
	612.5	0.011414	0.001938	5	0.021872	0.005574	5
	613.75	0.011119	0.001866	5	0.02175	0.005562	5
	615	0.011174	0.001851	5	0.021422	0.005384	5
	616.25	0.011272	0.001897	5	0.021689	0.005489	5
	617.5	0.011202	0.001825	5	0.021733	0.00548	5
	618.75	0.011146	0.001844	5	0.021654	0.005457	5
	620	0.011271	0.001907	5	0.022047	0.005644	5
	621.25	0.011782	0.002091	5	0.02236	0.005902	5
	622.5	0.011852	0.002002	5	0.022565	0.005874	5
	623.75	0.011643	0.001902	5	0.022229	0.00578	5
	625	0.011531	0.001788	5	0.021934	0.005867	5
	626.25	0.011421	0.001697	5	0.022226	0.005958	5
	627.5	0.011548	0.001629	5	0.022496	0.006094	5
	628.75	0.01161	0.001658	5	0.022634	0.006237	5
	630	0.011573	0.001698	5	0.022625	0.006281	5
	631.25	0.011109	0.001388	5	0.022738	0.006264	5
	632.5	0.011238	0.001324	5	0.022913	0.006256	5
	633.75	0.011404	0.001445	5	0.022789	0.006283	5
	635	0.011365	0.001479	5	0.022676	0.006369	5
	636.25	0.011412	0.00139	5	0.022647	0.006386	5
	637.5	0.011392	0.001382	5	0.022745	0.006389	5
	638.75	0.011494	0.001389	5	0.022868	0.006454	5
	640	0.011238	0.001272	5	0.022656	0.00641	5
	641.25	0.010738	0.001115	5	0.022587	0.00635	5
	642.5	0.010544	0.001143	5	0.022696	0.00636	5
	643.75	0.010551	0.001111	5	0.022788	0.006493	5
	645	0.010533	0.001117	5	0.02277	0.006467	5
	646.25	0.010678	0.001125	5	0.022868	0.006606	5
	647.5	0.010841	0.0011	5	0.022776	0.006636	5
	648.75	0.01152	0.001216	5	0.022767	0.006556	5
	650	0.011337	0.001256	5	0.02288	0.006528	5
	651.25	0.011171	0.001254	5	0.022878	0.006577	5
	652.5	0.010985	0.001229	5	0.023054	0.006718	5
	653.75	0.011001	0.001065	5	0.023008	0.006635	5
	655	0.01101	0.001141	5	0.022867	0.006575	5
	656.25	0.010958	0.001187	5	0.022723	0.006517	5
	657.5	0.011476	0.001285	5	0.02257	0.006478	5
	658.75	0.011591	0.001314	5	0.022783	0.006576	5
	660	0.011516	0.001288	5	0.022796	0.006577	5
	661.25	0.011411	0.00123	5	0.022827	0.006516	5
	662.5	0.011559	0.001322	5	0.022791	0.006647	5
	663.75	0.011504	0.001291	5	0.022664	0.006571	5
	665	0.011643	0.001371	5	0.022697	0.006514	5
	666.25	0.011829	0.001443	5	0.022506	0.006383	5
	667.5	0.011786	0.001422	5	0.022411	0.006334	5
	668.75	0.011347	0.001388	5	0.022981	0.006212	5
	670	0.01135	0.001336	5	0.022754	0.005955	5
	671.25	0.011413	0.001318	5	0.023174	0.006242	5
	672.5	0.011438	0.001279	5	0.023101	0.006151	5
	673.75	0.011341	0.001361	5	0.023442	0.006218	5
	675	0.011234	0.001285	5	0.023445	0.006207	5
	676.25	0.011108	0.001235	5	0.023461	0.006107	5
	677.5	0.010771	0.001116	5	0.023554	0.006216	5
	678.75	0.010594	0.001056	5	0.023362	0.006127	5
	680	0.010706	0.001087	5	0.023368	0.00607	5
	681.25	0.01076	0.001079	5	0.023218	0.006083	5
	682.5	0.01067	0.001017	5	0.023271	0.006115	5
	683.75	0.010808	0.001003	5	0.023592	0.006187	5
	685	0.010814	0.001019	5	0.023488	0.006191	5
	686.25	0.010617	0.001137	5	0.023625	0.006332	5
	687.5	0.010345	0.001214	5	0.023688	0.006446	5
	688.75	0.010136	0.001081	5	0.023375	0.006709	5
	690	0.010106	0.001033	5	0.023452	0.006932	5
	691.25	0.010175	0.00095	5	0.023013	0.006693	5
	692.5	0.010281	0.001053	5	0.022889	0.006635	5
	693.75	0.010241	0.001024	5	0.022992	0.006627	5
	695	0.010336	0.001022	5	0.023118	0.00673	5
	696.25	0.010606	0.001048	5	0.023189	0.006881	5
	697.5	0.01098	0.000904	5	0.023365	0.006923	5
	698.75	0.010982	0.000899	5	0.023423	0.006962	5
	700	0.011013	0.001034	5	0.023451	0.007075	5
	701.25	0.010955	0.000997	5	0.023514	0.007064	5
	702.5	0.010855	0.000971	5	0.023313	0.006991	5
	703.75	0.010898	0.001071	5	0.023056	0.0069	5
	705	0.010733	0.001018	5	0.022987	0.006886	5
	706.25	0.010524	0.001039	5	0.023089	0.006883	5
	707.5	0.010811	0.001067	5	0.022915	0.006746	5
	708.75	0.010808	0.001124	5	0.02264	0.006624	5
	710	0.010913	0.001178	5	0.022609	0.006687	5
	711.25	0.010859	0.001228	5	0.022781	0.006733	5
	712.5	0.011058	0.001306	5	0.022986	0.00673	5
	713.75	0.011059	0.001336	5	0.022888	0.006686	5
	715	0.010976	0.001367	5	0.023141	0.006649	5
	716.25	0.010749	0.00126	5	0.023222	0.006674	5
	717.5	0.010278	0.001263	5	0.023077	0.006555	5
	718.75	0.010212	0.001262	5	0.023061	0.006477	5
	720	0.010023	0.001099	5	0.023048	0.006393	5
	721.25	0.010462	0.001368	5	0.022827	0.006213	5
	722.5	0.010599	0.001413	5	0.022857	0.006096	5
	723.75	0.010615	0.001432	5	0.023073	0.006191	5
	725	0.010982	0.001387	5	0.023295	0.006244	5
	726.25	0.011167	0.001372	5	0.023046	0.00611	5
	727.5	0.010896	0.001247	5	0.02324	0.006142	5
	728.75	0.010793	0.001175	5	0.023516	0.006098	5
	730	0.010661	0.00114	5	0.023452	0.006098	5
	731.25	0.010728	0.001191	5	0.023172	0.005922	5
	732.5	0.010407	0.001115	5	0.023156	0.006032	5
	733.75	0.010434	0.00113	5	0.023062	0.006057	5
	735	0.010371	0.001099	5	0.022947	0.006058	5
	736.25	0.010481	0.001154	5	0.022919	0.005975	5
	737.5	0.010581	0.001191	5	0.023001	0.006089	5
	738.75	0.010614	0.001189	5	0.022844	0.006041	5
	740	0.010716	0.001267	5	0.022865	0.006102	5
	741.25	0.010253	0.001042	5	0.022882	0.006114	5
	742.5	0.010025	0.00099	5	0.023092	0.006309	5
	743.75	0.009931	0.000946	5	0.023038	0.006292	5
	745	0.009626	0.001069	5	0.022965	0.006309	5
	746.25	0.009699	0.001211	5	0.022844	0.00623	5
	747.5	0.009768	0.001335	5	0.022794	0.006255	5
	748.75	0.009756	0.001356	5	0.022611	0.006386	5
	750	0.009732	0.001369	5	0.022575	0.006325	5
	751.25	0.009734	0.001308	5	0.02257	0.006491	5
	752.5	0.009911	0.001141	5	0.022473	0.006493	5
	753.75	0.010019	0.001063	5	0.022321	0.006391	5
	755	0.010542	0.001117	5	0.022361	0.006431	5
	756.25	0.010569	0.001162	5	0.022115	0.006333	5
	757.5	0.0105	0.001159	5	0.022111	0.006329	5
	758.75	0.010459	0.001143	5	0.022151	0.006283	5
	760	0.010368	0.001113	5	0.022016	0.006196	5
	761.25	0.010376	0.001079	5	0.022044	0.006296	5
	762.5	0.010572	0.001175	5	0.022213	0.006121	5
	763.75	0.010642	0.001188	5	0.022272	0.006242	5
	765	0.010603	0.001149	5	0.022328	0.006306	5
	766.25	0.010407	0.001071	5	0.022583	0.00649	5
	767.5	0.010317	0.001022	5	0.022537	0.006488	5
	768.75	0.010509	0.001082	5	0.022201	0.006308	5
	770	0.010568	0.001063	5	0.022164	0.006328	5
	771.25	0.010455	0.001038	5	0.022272	0.006369	5
	772.5	0.010238	0.001126	5	0.022126	0.006322	5
	773.75	0.010025	0.001123	5	0.022052	0.006441	5
	775	0.009529	0.001117	5	0.021895	0.006382	5
	776.25	0.009569	0.001084	5	0.022068	0.006484	5
	777.5	0.009598	0.00111	5	0.022071	0.006419	5
	778.75	0.009788	0.001246	5	0.021886	0.006494	5
	780	0.009903	0.001323	5	0.021825	0.006547	5
	781.25	0.009866	0.001327	5	0.022043	0.006577	5
	782.5	0.009911	0.00133	5	0.021614	0.006798	5
	783.75	0.009704	0.001334	5	0.021514	0.00668	5
	785	0.009823	0.001308	5	0.021361	0.00649	5
	786.25	0.009705	0.001265	5	0.021673	0.006315	5
	787.5	0.009826	0.001163	5	0.021949	0.006252	5
	788.75	0.009651	0.001212	5	0.022234	0.006345	5
	790	0.009743	0.001239	5	0.022404	0.006338	5
	791.25	0.009755	0.001247	5	0.022587	0.006388	5
	792.5	0.009974	0.00107	5	0.022548	0.006385	5
	793.75	0.009966	0.001112	5	0.022626	0.006387	5
	795	0.010083	0.001062	5	0.022646	0.00644	5
	796.25	0.010019	0.000984	5	0.022567	0.006397	5
	797.5	0.009933	0.000976	5	0.022513	0.006409	5
	798.75	0.009952	0.000913	5	0.02279	0.006461	5
	800	0.009953	0.000974	5	0.02302	0.006518	5
	801.25	0.009976	0.000962	5	0.023152	0.006569	5
	802.5	0.00966	0.000875	5	0.022911	0.006396	5
	803.75	0.009701	0.000836	5	0.022862	0.006434	5
	805	0.009523	0.000846	5	0.023034	0.006551	5
	806.25	0.009568	0.000811	5	0.022842	0.006717	5
	807.5	0.00954	0.000857	5	0.022603	0.006785	5
	808.75	0.009646	0.000831	5	0.022607	0.006859	5
	810	0.009581	0.000817	5	0.022504	0.006817	5
	811.25	0.009666	0.000839	5	0.02213	0.006539	5
	812.5	0.009543	0.000949	5	0.022246	0.006581	5
	813.75	0.00982	0.000909	5	0.02246	0.006686	5
	815	0.009896	0.001002	5	0.022421	0.006555	5
	816.25	0.009824	0.000986	5	0.022383	0.006536	5
	817.5	0.009939	0.001047	5	0.02242	0.00651	5
	818.75	0.010052	0.001092	5	0.022235	0.006368	5
	820	0.009881	0.001047	5	0.022024	0.006299	5
	821.25	0.009911	0.00109	5	0.021797	0.006341	5
	822.5	0.010108	0.001178	5	0.021992	0.006383	5
	823.75	0.010306	0.001111	5	0.02206	0.00636	5
	825	0.010443	0.001078	5	0.021879	0.006295	5
	826.25	0.010552	0.001052	5	0.021849	0.006212	5
	827.5	0.010709	0.001118	5	0.022068	0.006222	5
	828.75	0.010646	0.001094	5	0.022128	0.006184	5
	830	0.010797	0.001191	5	0.022081	0.006195	5
	831.25	0.010885	0.001125	5	0.02216	0.006245	5
	832.5	0.010936	0.001135	5	0.022201	0.006305	5
	833.75	0.010685	0.001131	5	0.022011	0.00624	5
	835	0.010531	0.001107	5	0.021934	0.006228	5
	836.25	0.010488	0.001136	5	0.022115	0.006356	5
	837.5	0.01047	0.001068	5	0.022266	0.00645	5
	838.75	0.010305	0.000985	5	0.022475	0.00662	5
	840	0.010361	0.00101	5	0.022501	0.006618	5
	841.25	0.010475	0.001006	5	0.022399	0.006483	5
	842.5	0.01034	0.000939	5	0.022705	0.006598	5
	843.75	0.010435	0.001027	5	0.022706	0.006587	5
	845	0.010437	0.001122	5	0.022793	0.006609	5
	846.25	0.010275	0.001131	5	0.022702	0.006635	5
	847.5	0.009988	0.001084	5	0.02251	0.006646	5
	848.75	0.010034	0.001176	5	0.0225	0.006779	5
	850	0.009987	0.001102	5	0.022456	0.006806	5
	851.25	0.009933	0.001197	5	0.022705	0.006865	5
	852.5	0.010216	0.001247	5	0.022689	0.006711	5
	853.75	0.010316	0.001305	5	0.022742	0.006634	5
	855	0.010242	0.001284	5	0.022933	0.00677	5
	856.25	0.010336	0.001254	5	0.023161	0.006763	5
	857.5	0.010229	0.001338	5	0.022938	0.006714	5
	858.75	0.010104	0.001421	5	0.022927	0.006726	5
	860	0.009985	0.00139	5	0.022802	0.006675	5
	861.25	0.010066	0.001363	5	0.022848	0.006742	5
	862.5	0.010082	0.001383	5	0.022595	0.006684	5
	863.75	0.009811	0.001265	5	0.022347	0.006596	5
	865	0.00976	0.001306	5	0.022178	0.006521	5
	866.25	0.009944	0.001283	5	0.022377	0.00642	5
	867.5	0.009978	0.001303	5	0.022433	0.006405	5
	868.75	0.00987	0.00119	5	0.022268	0.006241	5
	870	0.009785	0.001161	5	0.022224	0.006243	5
	871.25	0.009907	0.001245	5	0.021918	0.006145	5
	872.5	0.009656	0.001209	5	0.021974	0.006174	5
	873.75	0.009639	0.001182	5	0.021918	0.006165	5
	875	0.01006	0.001136	5	0.02204	0.006154	5
	876.25	0.010071	0.001253	5	0.021795	0.00606	5
	877.5	0.010205	0.001176	5	0.021985	0.006189	5
	878.75	0.010202	0.001123	5	0.021948	0.006204	5
	880	0.010169	0.001133	5	0.021945	0.006179	5
	881.25	0.010061	0.001065	5	0.022134	0.006264	5
	882.5	0.01017	0.001013	5	0.022108	0.00632	5
	883.75	0.010173	0.001007	5	0.022318	0.006465	5
	885	0.010209	0.000885	5	0.022608	0.006592	5
	886.25	0.010096	0.00091	5	0.02242	0.006556	5
	887.5	0.01037	0.000918	5	0.022485	0.006582	5
	888.75	0.010548	0.001033	5	0.022318	0.006561	5
	890	0.010707	0.001078	5	0.022542	0.006728	5
	891.25	0.010643	0.001066	5	0.022902	0.006877	5
	892.5	0.010571	0.001046	5	0.022888	0.006897	5
	893.75	0.010578	0.001069	5	0.022927	0.006959	5
	895	0.010361	0.001012	5	0.022768	0.006897	5
	896.25	0.010268	0.000899	5	0.022597	0.006931	5
	897.5	0.01034	0.000999	5	0.022472	0.006838	5
	898.75	0.010408	0.001028	5	0.022267	0.006684	5
	900	0.010706	0.00093	5	0.022599	0.006853	5
	901.25	0.010663	0.000921	5	0.022423	0.006752	5
	902.5	0.010639	0.000922	5	0.022396	0.006667	5
	903.75	0.010632	0.00097	5	0.022569	0.006695	5
	905	0.010631	0.001042	5	0.022518	0.006542	5
	906.25	0.01065	0.001019	5	0.022417	0.00659	5
	907.5	0.01039	0.000972	5	0.022169	0.006486	5
	908.75	0.010226	0.000961	5	0.022275	0.006507	5
	910	0.010152	0.000889	5	0.022113	0.006277	5
	911.25	0.010126	0.000793	5	0.021797	0.006142	5
	912.5	0.010305	0.000839	5	0.021653	0.006156	5
	913.75	0.010263	0.000808	5	0.021685	0.006167	5
	915	0.010451	0.000961	5	0.021653	0.006152	5
	916.25	0.010478	0.000954	5	0.021706	0.006165	5
	917.5	0.01021	0.000876	5	0.021943	0.006279	5
	918.75	0.010321	0.000852	5	0.021994	0.006316	5
	920	0.010084	0.000948	5	0.021857	0.006239	5
	921.25	0.010257	0.000873	5	0.021856	0.006227	5
	922.5	0.010207	0.000875	5	0.022048	0.006255	5
	923.75	0.010242	0.000934	5	0.021838	0.006181	5
	925	0.010119	0.000908	5	0.022045	0.006226	5
	926.25	0.010507	0.001091	5	0.022031	0.006198	5
	927.5	0.010649	0.001201	5	0.022349	0.006409	5
	928.75	0.010717	0.001213	5	0.022261	0.00636	5
	930	0.010637	0.001254	5	0.022209	0.006357	5
	931.25	0.010648	0.001236	5	0.022428	0.006429	5
	932.5	0.010483	0.001166	5	0.022599	0.006484	5
	933.75	0.010462	0.001237	5	0.022541	0.006399	5
	935	0.010364	0.001162	5	0.022592	0.006469	5
	936.25	0.010694	0.001352	5	0.022587	0.006439	5
	937.5	0.010877	0.001306	5	0.022457	0.006414	5
	938.75	0.010756	0.001386	5	0.022393	0.006418	5
	940	0.010915	0.001399	5	0.02249	0.006461	5
	941.25	0.010728	0.001527	5	0.022663	0.006641	5
	942.5	0.010739	0.001561	5	0.022705	0.006625	5
	943.75	0.010824	0.001589	5	0.022683	0.006647	5
	945	0.010806	0.001559	5	0.022256	0.006664	5
	946.25	0.010404	0.001446	5	0.022379	0.006749	5
	947.5	0.010334	0.0013	5	0.022404	0.006519	5
	948.75	0.010312	0.001177	5	0.022577	0.006565	5
	950	0.010478	0.001106	5	0.022686	0.006635	5
	951.25	0.010436	0.001163	5	0.022603	0.006629	5
	952.5	0.010397	0.001162	5	0.022543	0.006631	5
	953.75	0.010391	0.001136	5	0.022646	0.00674	5
	955	0.010436	0.0011	5	0.022547	0.006703	5
	956.25	0.010107	0.000987	5	0.022622	0.006747	5
	957.5	0.009964	0.000985	5	0.022515	0.006598	5
	958.75	0.010109	0.001048	5	0.022552	0.006575	5
	960	0.010095	0.001124	5	0.022325	0.006519	5
	961.25	0.010178	0.00115	5	0.022384	0.006326	5
	962.5	0.010044	0.001183	5	0.022044	0.006243	5
	963.75	0.009914	0.00116	5	0.022045	0.006238	5
	965	0.009822	0.00118	5	0.02225	0.006251	5
	966.25	0.010158	0.001097	5	0.022203	0.006232	5
	967.5	0.010265	0.001089	5	0.022315	0.006071	5
	968.75	0.010288	0.00113	5	0.022223	0.006049	5
	970	0.010099	0.001106	5	0.022352	0.005963	5
	971.25	0.010079	0.00108	5	0.022383	0.006002	5
	972.5	0.010197	0.001137	5	0.0224	0.005981	5
	973.75	0.01052	0.001333	5	0.022329	0.005879	5
	975	0.010443	0.001333	5	0.022698	0.006024	5
	976.25	0.010458	0.001333	5	0.02286	0.006175	5
	977.5	0.010574	0.001364	5	0.022798	0.006176	5
	978.75	0.010364	0.001176	5	0.022938	0.006172	5
	980	0.010242	0.001018	5	0.023218	0.006265	5
	981.25	0.010186	0.001008	5	0.022866	0.006284	5
	982.5	0.010366	0.001132	5	0.02307	0.006337	5
	983.75	0.01055	0.001149	5	0.023127	0.006353	5
	985	0.011085	0.001255	5	0.023041	0.006472	5
	986.25	0.010883	0.0013	5	0.023073	0.006491	5
	987.5	0.010791	0.001327	5	0.023053	0.006632	5
	988.75	0.01072	0.001275	5	0.023329	0.006696	5
	990	0.010801	0.001358	5	0.023211	0.006761	5
	991.25	0.010842	0.001344	5	0.02329	0.006795	5
	992.5	0.010714	0.001329	5	0.023394	0.006865	5
	993.75	0.010475	0.001066	5	0.023212	0.006881	5
	995	0.010414	0.001081	5	0.02304	0.006748	5
	996.25	0.010412	0.001163	5	0.022907	0.006582	5
	997.5	0.010514	0.001201	5	0.022979	0.00657	5
	998.75	0.010575	0.001226	5	0.023016	0.006682	5
	1000	0.010685	0.001249	5	0.022753	0.006544	5
	1001.25	0.01074	0.001181	5	0.023038	0.006578	5
	1002.5	0.01059	0.001036	5	0.023005	0.006605	5
	1003.75	0.010389	0.001101	5	0.023075	0.006575	5
	1005	0.01009	0.001091	5	0.023188	0.006421	5
	1006.25	0.009967	0.00109	5	0.023347	0.006448	5
	1007.5	0.009877	0.001077	5	0.02301	0.006477	5
	1008.75	0.009923	0.001109	5	0.022733	0.006421	5
	1010	0.009784	0.001066	5	0.022795	0.006435	5
	1011.25	0.009705	0.00107	5	0.022645	0.006436	5
	1012.5	0.009827	0.00112	5	0.022395	0.006277	5
	1013.75	0.010019	0.001151	5	0.022634	0.006389	5
	1015	0.010073	0.001155	5	0.022668	0.006442	5
	1016.25	0.009966	0.001125	5	0.02246	0.006402	5
	1017.5	0.009908	0.001099	5	0.022496	0.0065	5
	1018.75	0.00997	0.001067	5	0.022423	0.006504	5
	1020	0.010249	0.001143	5	0.022514	0.006518	5
	1021.25	0.010398	0.001274	5	0.022349	0.006536	5
	1022.5	0.010539	0.001356	5	0.022208	0.006471	5
	1023.75	0.010559	0.001325	5	0.022078	0.0065	5
	1025	0.010295	0.001271	5	0.021822	0.006573	5
	1026.25	0.010332	0.001293	5	0.021554	0.006608	5
	1027.5	0.010397	0.001239	5	0.021698	0.006584	5
	1028.75	0.010374	0.001193	5	0.021636	0.006587	5
	1030	0.010447	0.001172	5	0.021561	0.006483	5
	1031.25	0.010477	0.001206	5	0.021486	0.00635	5
	1032.5	0.01042	0.001182	5	0.021588	0.006415	5
	1033.75	0.010291	0.001128	5	0.021314	0.006277	5
	1035	0.010165	0.001094	5	0.021095	0.006199	5
	1036.25	0.010302	0.001051	5	0.021082	0.006127	5
	1037.5	0.010288	0.000931	5	0.020901	0.005965	5
	1038.75	0.010325	0.000893	5	0.020913	0.006	5
	1040	0.010197	0.000805	5	0.020681	0.005946	5
	1041.25	0.010102	0.000817	5	0.020849	0.005962	5
	1042.5	0.009992	0.000741	5	0.021051	0.006109	5
	1043.75	0.01006	0.000833	5	0.021053	0.006147	5
	1045	0.010302	0.000929	5	0.02124	0.006028	5
	1046.25	0.010418	0.001011	5	0.02136	0.005984	5
	1047.5	0.010492	0.001062	5	0.021347	0.005968	5
	1048.75	0.010567	0.001167	5	0.021611	0.006021	5
	1050	0.010566	0.001121	5	0.02158	0.006073	5
	1051.25	0.010659	0.001034	5	0.021837	0.006265	5
	1052.5	0.010794	0.001157	5	0.021741	0.006244	5
	1053.75	0.010828	0.001128	5	0.021848	0.00629	5
	1055	0.010946	0.001205	5	0.021884	0.006314	5
	1056.25	0.010861	0.00126	5	0.022003	0.00643	5
	1057.5	0.010921	0.001375	5	0.022247	0.006529	5
	1058.75	0.010795	0.001406	5	0.022385	0.006632	5
	1060	0.010603	0.001391	5	0.022559	0.006747	5
	1061.25	0.010468	0.001357	5	0.022358	0.006664	5
	1062.5	0.010441	0.001359	5	0.022275	0.006585	5
	1063.75	0.010422	0.001377	5	0.022283	0.006527	5
	1065	0.010332	0.001423	5	0.022239	0.006664	5
	1066.25	0.010319	0.001377	5	0.022237	0.006675	5
	1067.5	0.010485	0.001538	5	0.0223	0.006759	5
	1068.75	0.010799	0.001462	5	0.022009	0.006699	5
	1070	0.010832	0.001505	5	0.022206	0.006829	5
	1071.25	0.010755	0.00152	5	0.022292	0.00667	5
	1072.5	0.010666	0.001347	5	0.022315	0.006629	5
	1073.75	0.010656	0.001393	5	0.0225	0.006778	5
	1075	0.010959	0.001358	5	0.022578	0.006723	5
	1076.25	0.011024	0.001325	5	0.022581	0.006643	5
	1077.5	0.010897	0.001277	5	0.022429	0.006656	5
	1078.75	0.010917	0.001246	5	0.022217	0.006518	5
	1080	0.010894	0.001304	5	0.022486	0.006473	5
	1081.25	0.010849	0.001334	5	0.022445	0.00645	5
	1082.5	0.010928	0.001382	5	0.022315	0.006386	5
	1083.75	0.011166	0.001488	5	0.022354	0.006414	5
	1085	0.011289	0.001501	5	0.022377	0.006437	5
	1086.25	0.0113	0.001519	5	0.022265	0.006419	5
	1087.5	0.011156	0.001359	5	0.022143	0.006351	5
	1088.75	0.01079	0.001359	5	0.022288	0.006305	5
	1090	0.01062	0.001359	5	0.022068	0.006209	5
	1091.25	0.010665	0.001395	5	0.021804	0.00621	5
	1092.5	0.01061	0.001496	5	0.022112	0.006188	5
	1093.75	0.010711	0.001556	5	0.02204	0.00598	5
	1095	0.010698	0.001545	5	0.021955	0.0059	5
	1096.25	0.010905	0.001496	5	0.022025	0.005976	5
	1097.5	0.011204	0.001363	5	0.021906	0.005878	5
	1098.75	0.011227	0.001437	5	0.021812	0.005763	5
	1100	0.011189	0.001404	5	0.02163	0.005845	5
	1101.25	0.01119	0.001363	5	0.021679	0.005876	5
	1102.5	0.011357	0.001377	5	0.021915	0.006022	5
	1103.75	0.011161	0.00123	5	0.021856	0.006051	5
	1105	0.011032	0.001202	5	0.02177	0.006003	5
	1106.25	0.011191	0.001328	5	0.02195	0.005962	5
	1107.5	0.011294	0.001428	5	0.022213	0.005938	5
	1108.75	0.011312	0.001511	5	0.022112	0.005953	5
	1110	0.011349	0.001531	5	0.022198	0.005958	5
	1111.25	0.011331	0.001449	5	0.02216	0.005862	5
	1112.5	0.011733	0.00147	5	0.021697	0.005845	5
	1113.75	0.01166	0.001489	5	0.021513	0.005882	5
	1115	0.011619	0.001481	5	0.021657	0.006094	5
	1116.25	0.011427	0.001474	5	0.021776	0.006154	5
	1117.5	0.011424	0.001595	5	0.02195	0.006241	5
	1118.75	0.011344	0.001535	5	0.022158	0.006303	5
	1120	0.011558	0.001556	5	0.02196	0.006203	5
	1121.25	0.011692	0.001613	5	0.022031	0.006279	5
	1122.5	0.011543	0.001617	5	0.021931	0.006217	5
	1123.75	0.01166	0.001651	5	0.021976	0.006154	5
	1125	0.011586	0.001638	5	0.022061	0.00613	5
	1126.25	0.011349	0.001471	5	0.022095	0.006134	5
	1127.5	0.011165	0.001398	5	0.021974	0.006275	5
	1128.75	0.011292	0.001422	5	0.022059	0.006423	5
	1130	0.01139	0.001468	5	0.022172	0.006473	5
	1131.25	0.01146	0.001553	5	0.022143	0.006599	5
	1132.5	0.011138	0.00148	5	0.022355	0.006737	5
	1133.75	0.011144	0.001461	5	0.022536	0.006833	5
	1135	0.010911	0.001517	5	0.022424	0.006661	5
	1136.25	0.011007	0.001462	5	0.022227	0.006571	5
	1137.5	0.010895	0.001397	5	0.02205	0.006526	5
	1138.75	0.011084	0.001434	5	0.021929	0.006485	5
	1140	0.010836	0.001464	5	0.022027	0.006479	5
	1141.25	0.010816	0.001555	5	0.022041	0.006505	5
	1142.5	0.010844	0.00147	5	0.022038	0.006427	5
	1143.75	0.010952	0.001398	5	0.022048	0.006425	5
	1145	0.011083	0.001361	5	0.02173	0.006352	5
	1146.25	0.011484	0.001508	5	0.021555	0.006415	5
	1147.5	0.011641	0.001472	5	0.021437	0.006287	5
	1148.75	0.011477	0.001445	5	0.021519	0.006198	5
	1150	0.011392	0.001401	5	0.02146	0.006242	5
	1151.25	0.011472	0.001365	5	0.021505	0.006177	5
	1152.5	0.011805	0.001537	5	0.021573	0.006177	5
	1153.75	0.011992	0.001557	5	0.021605	0.006185	5
	1155	0.012031	0.001556	5	0.021748	0.006397	5
	1156.25	0.011895	0.001625	5	0.022035	0.006412	5
	1157.5	0.01179	0.001556	5	0.022156	0.006445	5
	1158.75	0.011727	0.001502	5	0.022114	0.006401	5
	1160	0.011886	0.00142	5	0.022289	0.006432	5
	1161.25	0.01183	0.001322	5	0.022463	0.006468	5
	1162.5	0.011905	0.001397	5	0.022448	0.006526	5
	1163.75	0.011839	0.00137	5	0.022432	0.006546	5
	1165	0.011718	0.001353	5	0.022771	0.006707	5
	1166.25	0.011415	0.001289	5	0.022639	0.006579	5
	1167.5	0.011413	0.001255	5	0.022765	0.006667	5
	1168.75	0.011363	0.001228	5	0.022531	0.006614	5
	1170	0.011488	0.001288	5	0.022417	0.006566	5
	1171.25	0.011343	0.00127	5	0.022486	0.006655	5
	1172.5	0.010953	0.001164	5	0.022458	0.006623	5
	1173.75	0.010732	0.00117	5	0.022482	0.006526	5
	1175	0.01064	0.001153	5	0.022195	0.006284	5
	1176.25	0.011009	0.00131	5	0.021926	0.006218	5
	1177.5	0.011091	0.00131	5	0.021786	0.006176	5
	1178.75	0.011041	0.001374	5	0.021839	0.006163	5
	1180	0.01087	0.001426	5	0.02152	0.006072	5
	1181.25	0.010808	0.001496	5	0.021438	0.006134	5
	1182.5	0.010759	0.001464	5	0.021642	0.006184	5
	1183.75	0.01049	0.001613	5	0.021568	0.006194	5
	1185	0.010544	0.001718	5	0.021311	0.006037	5
	1186.25	0.010464	0.001724	5	0.021516	0.006173	5
	1187.5	0.010354	0.00173	5	0.02147	0.006121	5
	1188.75	0.010574	0.001805	5	0.021689	0.006216	5
	1190	0.010479	0.001756	5	0.021676	0.006226	5
	1191.25	0.010537	0.00165	5	0.021952	0.006349	5
	1192.5	0.010626	0.001632	5	0.021821	0.006317	5
	1193.75	0.010578	0.001632	5	0.021615	0.006354	5
	1195	0.01058	0.001537	5	0.021672	0.006464	5
	1196.25	0.010203	0.00143	5	0.022006	0.006577	5
	1197.5	0.010161	0.001468	5	0.022264	0.006659	5
	1198.75	0.010197	0.001438	5	0.022208	0.006752	5
	1200	0.010461	0.001468	5	0.022514	0.006861	5
	1201.25	0.010483	0.001402	5	0.022268	0.006611	5
	1202.5	0.010569	0.001475	5	0.021974	0.00656	5
	1203.75	0.010657	0.001548	5	0.022105	0.006592	5
	1205	0.011305	0.001487	5	0.022393	0.006633	5
	1206.25	0.01146	0.001609	5	0.022296	0.006545	5
	1207.5	0.011521	0.001624	5	0.022159	0.006536	5
	1208.75	0.011451	0.00164	5	0.022085	0.006483	5
	1210	0.011493	0.001684	5	0.021995	0.006433	5
	1211.25	0.011551	0.00171	5	0.021681	0.006215	5
	1212.5	0.011488	0.001706	5	0.021787	0.006267	5
	1213.75	0.011441	0.001698	5	0.022069	0.006289	5
	1215	0.011658	0.001748	5	0.02234	0.006363	5
	1216.25	0.011642	0.001698	5	0.021961	0.00625	5
	1217.5	0.011677	0.00171	5	0.021754	0.006184	5
	1218.75	0.011757	0.001729	5	0.021852	0.006239	5
	1220	0.01186	0.001826	5	0.021622	0.006193	5
	1221.25	0.01196	0.001898	5	0.021604	0.00621	5
	1222.5	0.012036	0.001834	5	0.02188	0.006253	5
	1223.75	0.012008	0.00179	5	0.021763	0.006194	5
	1225	0.011299	0.001789	5	0.021665	0.006299	5
	1226.25	0.011104	0.001735	5	0.021874	0.00651	5
	1227.5	0.011009	0.001678	5	0.021886	0.006473	5
	1228.75	0.010857	0.001609	5	0.022064	0.00657	5
	1230	0.010883	0.001583	5	0.022162	0.006625	5
	1231.25	0.010977	0.001684	5	0.022454	0.006695	5
	1232.5	0.011112	0.001732	5	0.022514	0.006644	5
	1233.75	0.011437	0.001983	5	0.022236	0.006605	5
	1235	0.011413	0.001922	5	0.021994	0.006544	5
	1236.25	0.011553	0.001887	5	0.022206	0.006626	5
	1237.5	0.011532	0.00188	5	0.02225	0.00663	5
	1238.75	0.01174	0.002022	5	0.022137	0.006567	5
	1240	0.011784	0.001867	5	0.022119	0.006558	5
	1241.25	0.011811	0.001841	5	0.022261	0.006654	5
	1242.5	0.011589	0.001867	5	0.022173	0.006653	5
	1243.75	0.011534	0.001895	5	0.022081	0.006605	5
	1245	0.01174	0.001949	5	0.022029	0.00644	5
	1246.25	0.011782	0.001939	5	0.021613	0.006229	5
	1247.5	0.012044	0.001833	5	0.021484	0.006238	5
	1248.75	0.012194	0.001777	5	0.021375	0.006175	5
	1250	0.012308	0.001752	5	0.021477	0.006106	5
	1251.25	0.012281	0.00167	5	0.021121	0.006046	5
	1252.5	0.012209	0.001645	5	0.02092	0.00602	5
	1253.75	0.011975	0.001479	5	0.02097	0.006025	5
	1255	0.011835	0.001541	5	0.020928	0.006065	5
	1256.25	0.012313	0.001625	5	0.020837	0.006075	5
	1257.5	0.012275	0.001582	5	0.020834	0.006111	5
	1258.75	0.012086	0.001425	5	0.021288	0.006222	5
	1260	0.011738	0.001353	5	0.021386	0.006275	5
	1261.25	0.011576	0.001344	5	0.021268	0.006143	5
	1262.5	0.011611	0.001377	5	0.021246	0.006031	5
	1263.75	0.01168	0.001272	5	0.021402	0.006123	5
	1265	0.011545	0.001284	5	0.021421	0.00624	5
	1266.25	0.011846	0.001364	5	0.021718	0.006268	5
	1267.5	0.011745	0.001498	5	0.022127	0.006323	5
	1268.75	0.011899	0.001661	5	0.022127	0.006302	5
	1270	0.011812	0.001721	5	0.022164	0.006354	5
	1271.25	0.01173	0.001731	5	0.022053	0.006243	5
	1272.5	0.011642	0.001683	5	0.022135	0.006297	5
	1273.75	0.011668	0.001608	5	0.022015	0.006244	5
	1275	0.011636	0.001509	5	0.022167	0.006279	5
	1276.25	0.011044	0.001514	5	0.022121	0.006296	5
	1277.5	0.011298	0.001594	5	0.022159	0.006311	5
	1278.75	0.011298	0.001644	5	0.021631	0.00615	5
	1280	0.01147	0.001733	5	0.021608	0.006141	5
	1281.25	0.011564	0.001728	5	0.021878	0.006323	5
	1282.5	0.011658	0.00169	5	0.021723	0.006442	5
	1283.75	0.011777	0.001871	5	0.021787	0.00652	5
	1285	0.011768	0.001739	5	0.021877	0.006366	5
	1286.25	0.011376	0.001592	5	0.021896	0.006465	5
	1287.5	0.011588	0.001605	5	0.021847	0.006444	5
	1288.75	0.01148	0.001564	5	0.021929	0.006438	5
	1290	0.011453	0.001606	5	0.021782	0.006414	5
	1291.25	0.011652	0.001607	5	0.022027	0.006617	5
	1292.5	0.011784	0.001603	5	0.022139	0.006624	5
	1293.75	0.011616	0.001597	5	0.022274	0.006577	5
	1295	0.011641	0.001639	5	0.022352	0.006603	5
	1296.25	0.011711	0.001674	5	0.022625	0.006726	5
[truncated: 7,603 more rows]
