# Supplementary material for: Microglia facilitate and stabilize the response to general anesthesia via modulating the neuronal network in a brain region-specific manner
Source: eLife. 2023 Dec 22;12:RP92252. doi: 10.7554/eLife.92252 (PMC10746144; doi:10.7554/eLife.92252)
Supplement: Figure 5—source data 4. [file elife-92252-fig5-data4.xlsx]

## Sheet: Figure 5F
		Consciousness (%)
		D7			D21
	Time after pentobarbital injection	Mean	SEM	N	Mean	SEM	N
	-1200	100	0	5	100	0	5
	-1196	100	0	5	100	0	5
	-1192	100	0	5	100	0	5
	-1188	100	0	5	100	0	5
	-1184	100	0	5	100	0	5
	-1180	100	0	5	100	0	5
	-1176	100	0	5	100	0	5
	-1172	100	0	5	100	0	5
	-1168	100	0	5	100	0	5
	-1164	100	0	5	100	0	5
	-1160	100	0	5	100	0	5
	-1156	100	0	5	100	0	5
	-1152	100	0	5	100	0	5
	-1148	100	0	5	100	0	5
	-1144	100	0	5	100	0	5
	-1140	100	0	5	100	0	5
	-1136	100	0	5	100	0	5
	-1132	100	0	5	100	0	5
	-1128	100	0	5	100	0	5
	-1124	100	0	5	100	0	5
	-1120	100	0	5	100	0	5
	-1116	100	0	5	100	0	5
	-1112	100	0	5	100	0	5
	-1108	100	0	5	100	0	5
	-1104	100	0	5	100	0	5
	-1100	100	0	5	100	0	5
	-1096	100	0	5	100	0	5
	-1092	100	0	5	100	0	5
	-1088	100	0	5	100	0	5
	-1084	100	0	5	100	0	5
	-1080	100	0	5	100	0	5
	-1076	100	0	5	100	0	5
	-1072	100	0	5	100	0	5
	-1068	100	0	5	100	0	5
	-1064	100	0	5	100	0	5
	-1060	100	0	5	100	0	5
	-1056	100	0	5	100	0	5
	-1052	100	0	5	100	0	5
	-1048	100	0	5	100	0	5
	-1044	100	0	5	100	0	5
	-1040	100	0	5	100	0	5
	-1036	100	0	5	100	0	5
	-1032	100	0	5	100	0	5
	-1028	100	0	5	100	0	5
	-1024	100	0	5	100	0	5
	-1020	100	0	5	100	0	5
	-1016	100	0	5	100	0	5
	-1012	100	0	5	100	0	5
	-1008	100	0	5	100	0	5
	-1004	100	0	5	100	0	5
	-1000	100	0	5	100	0	5
	-996	100	0	5	100	0	5
	-992	100	0	5	100	0	5
	-988	100	0	5	100	0	5
	-984	100	0	5	100	0	5
	-980	100	0	5	100	0	5
	-976	100	0	5	100	0	5
	-972	100	0	5	100	0	5
	-968	100	0	5	100	0	5
	-964	100	0	5	100	0	5
	-960	100	0	5	100	0	5
	-956	100	0	5	100	0	5
	-952	100	0	5	100	0	5
	-948	100	0	5	100	0	5
	-944	100	0	5	100	0	5
	-940	100	0	5	100	0	5
	-936	100	0	5	100	0	5
	-932	100	0	5	100	0	5
	-928	100	0	5	100	0	5
	-924	100	0	5	100	0	5
	-920	100	0	5	100	0	5
	-916	100	0	5	100	0	5
	-912	100	0	5	100	0	5
	-908	100	0	5	100	0	5
	-904	100	0	5	100	0	5
	-900	100	0	5	100	0	5
	-896	100	0	5	100	0	5
	-892	100	0	5	100	0	5
	-888	100	0	5	100	0	5
	-884	100	0	5	100	0	5
	-880	100	0	5	100	0	5
	-876	100	0	5	100	0	5
	-872	100	0	5	100	0	5
	-868	100	0	5	100	0	5
	-864	100	0	5	100	0	5
	-860	100	0	5	100	0	5
	-856	100	0	5	100	0	5
	-852	100	0	5	99.3417	0.339593	5
	-848	100	0	5	98.6833	0.679187	5
	-844	100	0	5	98.025	1.01878	5
	-840	100	0	5	97.3667	1.35837	5
	-836	100	0	5	96.7083	1.69797	5
	-832	100	0	5	96.7083	1.69797	5
	-828	100	0	5	96.7083	1.69797	5
	-824	100	0	5	96.7083	1.69797	5
	-820	100	0	5	96.7083	1.69797	5
	-816	100	0	5	96.7083	1.69797	5
	-812	100	0	5	96.7083	1.69797	5
	-808	100	0	5	96.7083	1.69797	5
	-804	100	0	5	96.7083	1.69797	5
	-800	100	0	5	96.05	2.03756	5
	-796	100	0	5	95.3917	2.37715	5
	-792	100	0	5	94.7333	2.71675	5
	-788	100	0	5	94.075	3.05634	5
	-784	100	0	5	93.4167	3.39593	5
	-780	100	0	5	92.7583	3.73553	5
	-776	100	0	5	92.1	4.07512	5
	-772	100	0	5	91.4417	4.41471	5
	-768	100	0	5	90.7833	4.75431	5
	-764	100	0	5	90.125	5.0939	5
	-760	100	0	5	89.4667	5.43349	5
	-756	100	0	5	88.8083	5.77309	5
	-752	100	0	5	88.15	6.11268	5
	-748	100	0	5	87.4917	6.45227	5
	-744	100	0	5	86.8333	6.79187	5
	-740	100	0	5	86.175	7.13146	5
	-736	100	0	5	85.5167	7.47105	5
	-732	100	0	5	85.5167	7.47105	5
	-728	100	0	5	85.5167	7.47105	5
	-724	100	0	5	85.5167	7.47105	5
	-720	100	0	5	85.5167	7.47105	5
	-716	100	0	5	85.5167	7.47105	5
	-712	100	0	5	84.8583	7.81065	5
	-708	100	0	5	84.2	8.15024	5
	-704	100	0	5	83.5417	8.48983	5
	-700	100	0	5	83.5417	8.48983	5
	-696	100	0	5	83.5417	8.48983	5
	-692	100	0	5	83.5417	8.48983	5
	-688	100	0	5	83.5417	8.48983	5
	-684	100	0	5	83.5417	8.48983	5
	-680	100	0	5	84.2	8.15024	5
	-676	100	0	5	84.8583	7.81065	5
	-672	100	0	5	85.5167	7.47105	5
	-668	100	0	5	86.175	7.13146	5
	-664	100	0	5	86.8333	6.79187	5
	-660	100	0	5	87.4917	6.45227	5
	-656	100	0	5	88.15	6.11268	5
	-652	100	0	5	88.8083	5.77309	5
	-648	100	0	5	89.4667	5.43349	5
	-644	100	0	5	90.125	5.0939	5
	-640	100	0	5	90.7833	4.75431	5
	-636	100	0	5	91.4417	4.41471	5
	-632	100	0	5	92.1	4.07512	5
	-628	100	0	5	92.7583	3.73553	5
	-624	100	0	5	93.4167	3.39593	5
	-620	100	0	5	94.075	3.05634	5
	-616	100	0	5	94.7333	2.71675	5
	-612	100	0	5	95.3917	2.37715	5
	-608	100	0	5	96.05	2.03756	5
	-604	100	0	5	96.7083	1.69797	5
	-600	100	0	5	97.3667	1.35837	5
	-596	100	0	5	98.025	1.01878	5
	-592	100	0	5	98.6833	0.679187	5
	-588	100	0	5	99.3417	0.339593	5
	-584	100	0	5	100	0	5
	-580	100	0	5	100	0	5
	-576	100	0	5	100	0	5
	-572	100	0	5	100	0	5
	-568	100	0	5	100	0	5
	-564	100	0	5	100	0	5
	-560	100	0	5	100	0	5
	-556	100	0	5	100	0	5
	-552	100	0	5	100	0	5
	-548	100	0	5	100	0	5
	-544	100	0	5	100	0	5
	-540	100	0	5	100	0	5
	-536	100	0	5	100	0	5
	-532	100	0	5	100	0	5
	-528	100	0	5	100	0	5
	-524	100	0	5	99.3417	0.339593	5
	-520	100	0	5	98.6833	0.679187	5
	-516	100	0	5	98.025	1.01878	5
	-512	100	0	5	97.3667	1.35837	5
	-508	100	0	5	96.7083	1.69797	5
	-504	100	0	5	96.05	2.03756	5
	-500	100	0	5	96.05	2.03756	5
	-496	100	0	5	96.05	2.03756	5
	-492	100	0	5	95.3917	2.37715	5
	-488	100	0	5	94.7333	2.71675	5
	-484	100	0	5	94.075	3.05634	5
	-480	100	0	5	93.4167	3.39593	5
	-476	100	0	5	92.7583	3.73553	5
	-472	100	0	5	92.1	4.07512	5
	-468	100	0	5	91.4417	4.41471	5
	-464	100	0	5	90.7833	4.75431	5
	-460	100	0	5	90.125	5.0939	5
	-456	100	0	5	89.4667	5.43349	5
	-452	100	0	5	88.8083	5.77309	5
	-448	100	0	5	88.15	6.11268	5
	-444	100	0	5	87.4917	6.45227	5
	-440	100	0	5	86.8333	6.79187	5
	-436	100	0	5	86.175	7.13146	5
	-432	100	0	5	85.5167	7.47105	5
	-428	100	0	5	84.8583	7.81065	5
	-424	100	0	5	84.2	8.15024	5
	-420	100	0	5	83.5417	8.48983	5
	-416	100	0	5	82.8833	8.82943	5
	-412	100	0	5	82.225	9.16902	5
	-408	100	0	5	81.5667	9.50861	5
	-404	100	0	5	81.5667	9.50861	5
	-400	100	0	5	81.5667	9.50861	5
	-396	100	0	5	81.5667	9.50861	5
	-392	100	0	5	81.5667	9.50861	5
	-388	100	0	5	81.5667	9.50861	5
	-384	100	0	5	82.225	9.16902	5
	-380	100	0	5	82.225	9.16902	5
	-376	100	0	5	81.5667	9.50861	5
	-372	100	0	5	81.5667	9.50861	5
	-368	100	0	5	81.5667	9.50861	5
	-364	100	0	5	81.5667	9.50861	5
	-360	100	0	5	81.5667	9.50861	5
	-356	100	0	5	81.5667	9.50861	5
	-352	99.3258	0.327738	5	81.5667	9.50861	5
	-348	98.6517	0.655476	5	81.5667	9.50861	5
	-344	97.9775	0.983214	5	81.5667	9.50861	5
	-340	97.3033	1.31095	5	81.5667	9.50861	5
	-336	96.6292	1.63869	5	81.5667	9.50861	5
	-332	95.955	1.96643	5	81.5667	9.50861	5
	-328	95.2808	2.29417	5	81.5667	9.50861	5
	-324	94.6067	2.6219	5	81.5667	9.50861	5
	-320	93.9325	2.94964	5	81.5667	9.50861	5
	-316	93.2583	3.27738	5	81.5667	9.50861	5
	-312	92.5842	3.60512	5	81.5667	9.50861	5
	-308	91.91	3.93286	5	81.5667	9.50861	5
	-304	91.2358	4.2606	5	81.5667	9.50861	5
	-300	90.5617	4.58833	5	81.5667	9.50861	5
	-296	89.8875	4.91607	5	81.5667	9.50861	5
	-292	89.2133	5.24381	5	81.5667	9.50861	5
	-288	88.5392	5.57155	5	81.5667	9.50861	5
	-284	87.865	5.89929	5	81.5667	9.50861	5
	-280	87.1908	6.22702	5	81.5667	9.50861	5
	-276	86.5167	6.55476	5	81.5667	9.50861	5
	-272	85.8425	6.8825	5	81.5667	9.50861	5
	-268	85.1683	7.21024	5	81.5667	9.50861	5
	-264	84.4942	7.53798	5	80.9083	9.84821	5
	-260	83.82	7.86571	5	80.25	10.1878	5
	-256	83.1458	8.19345	5	80.25	10.1878	5
	-252	82.4717	8.52119	5	80.25	10.1878	5
	-248	81.7975	8.84893	5	80.25	10.1878	5
	-244	81.1233	9.17667	5	80.25	10.1878	5
	-240	80.4492	9.50441	5	80.25	10.1878	5
	-236	79.775	9.83214	5	80.25	10.1878	5
	-232	79.775	9.83214	5	80.25	10.1878	5
	-228	79.775	9.83214	5	80.25	10.1878	5
	-224	79.775	9.83214	5	80.25	10.1878	5
	-220	79.775	9.83214	5	80.25	10.1878	5
	-216	79.775	9.83214	5	80.25	10.1878	5
	-212	79.775	9.83214	5	80.25	10.1878	5
	-208	79.775	9.83214	5	80.25	10.1878	5
	-204	79.775	9.83214	5	80.25	10.1878	5
	-200	79.775	9.83214	5	80.25	10.1878	5
	-196	79.775	9.83214	5	80.25	10.1878	5
	-192	79.775	9.83214	5	80.25	10.1878	5
	-188	79.775	9.83214	5	80.25	10.1878	5
	-184	79.775	9.83214	5	80.25	10.1878	5
	-180	79.775	9.83214	5	80.25	10.1878	5
	-176	79.775	9.83214	5	80.25	10.1878	5
	-172	79.775	9.83214	5	80.25	10.1878	5
	-168	79.775	9.83214	5	80.25	10.1878	5
	-164	79.775	9.83214	5	80.25	10.1878	5
	-160	79.775	9.83214	5	80.25	10.1878	5
	-156	79.775	9.83214	5	80.25	10.1878	5
	-152	79.775	9.83214	5	80.25	10.1878	5
	-148	79.775	9.83214	5	80.25	10.1878	5
	-144	80.4492	9.50441	5	80.25	10.1878	5
	-140	81.1233	9.17667	5	80.25	10.1878	5
	-136	81.7975	8.84893	5	80.9083	9.84821	5
	-132	82.4717	8.52119	5	81.5667	9.50861	5
	-128	83.1458	8.19345	5	82.225	9.16902	5
	-124	83.82	7.86571	5	82.8833	8.82943	5
	-120	84.4942	7.53798	5	83.5417	8.48983	5
	-116	85.1683	7.21024	5	84.2	8.15024	5
	-112	85.8425	6.8825	5	84.8583	7.81065	5
	-108	86.5167	6.55476	5	85.5167	7.47105	5
	-104	87.1908	6.22702	5	86.175	7.13146	5
	-100	87.865	5.89929	5	86.8333	6.79187	5
	-96	88.5392	5.57155	5	87.4917	6.45227	5
	-92	89.2133	5.24381	5	88.15	6.11268	5
	-88	89.8875	4.91607	5	88.8083	5.77309	5
	-84	90.5617	4.58833	5	89.4667	5.43349	5
	-80	91.2358	4.2606	5	90.125	5.0939	5
	-76	91.91	3.93286	5	90.7833	4.75431	5
	-72	92.5842	3.60512	5	91.4417	4.41471	5
	-68	93.2583	3.27738	5	92.1	4.07512	5
	-64	93.9325	2.94964	5	92.7583	3.73553	5
	-60	94.6067	2.6219	5	93.4167	3.39593	5
	-56	95.2808	2.29417	5	94.075	3.05634	5
	-52	95.955	1.96643	5	94.7333	2.71675	5
	-48	96.6292	1.63869	5	95.3917	2.37715	5
	-44	97.3033	1.31095	5	96.05	2.03756	5
	-40	97.3133	0.957842	5	96.7083	1.69797	5
	-36	97.3233	0.814799	5	97.3667	1.35837	5
	-32	97.3333	0.978725	5	98.025	1.01878	5
	-28	98.0075	1.00608	5	98.6833	0.679187	5
	-24	98.0075	1.00608	5	99.3417	0.339593	5
	-20	98.0075	1.00608	5	100	0	5
	-16	98.0075	1.00608	5	100	0	5
	-12	98.0075	1.00608	5	100	0	5
	-8	98.0075	1.00608	5	100	0	5
	-4	100	0	5	94.64	2.64778	5
	0	100	0	5	95.31	2.31681	5
	4	100	0	5	95.98	1.98584	5
	8	100	0	5	96.65	1.65486	5
	12	100	0	5	97.32	1.32389	5
	16	100	0	5	97.99	0.992918	5
	20	100	0	5	98.66	0.661945	5
	24	99.3267	0.328392	5	99.33	0.330973	5
	28	98.6533	0.656784	5	100	0	5
	32	97.98	0.985175	5	100	0	5
	36	97.3067	1.31357	5	100	0	5
	40	96.6333	1.64196	5	100	0	5
	44	95.96	1.97035	5	100	0	5
	48	95.2867	2.29874	5	100	0	5
	52	93.9283	2.5736	5	100	0	5
	56	92.57	2.87867	5	100	0	5
	60	91.2117	3.20532	5	100	0	5
	64	89.8533	3.54761	5	100	0	5
	68	88.495	3.90141	5	100	0	5
	72	87.1367	4.26387	5	100	0	5
	76	85.7783	4.63295	5	100	0	5
	80	84.42	5.0072	5	100	0	5
	84	83.0617	5.38552	5	100	0	5
	88	81.7033	5.76712	5	100	0	5
	92	80.345	6.15139	5	100	0	5
	96	78.9867	6.53787	5	98.67	0.409119	5
	100	77.6283	6.92617	5	97.34	0.818238	5
	104	76.27	7.31601	5	96.01	1.22736	5
	108	74.9117	7.70715	5	94.68	1.63648	5
	112	73.5533	8.09942	5	93.35	2.0456	5
	116	72.195	8.49264	5	92.02	2.45472	5
	120	70.8367	8.8867	5	90.69	2.86383	5
	124	69.4783	9.28148	5	89.36	3.27295	5
	128	68.12	9.67691	5	88.03	3.68207	5
	132	66.7617	10.0729	5	87.37	3.90171	5
	136	65.4033	10.4694	5	86.71	4.13739	5
	140	64.045	10.8663	5	86.05	4.38654	5
	144	63.36	11.0196	5	85.39	4.64699	5
	148	62.675	11.1799	5	84.73	4.91694	5
	152	61.99	11.3469	5	84.07	5.19491	5
	156	61.305	11.5203	5	83.41	5.47968	5
	160	60.62	11.6998	5	82.75	5.77025	5
	164	59.935	11.8852	5	82.09	6.06578	5
	168	59.25	12.0762	5	81.43	6.36558	5
	172	59.25	12.0762	5	80.77	6.66908	5
	176	59.25	12.0762	5	80.11	6.97578	5
	180	59.25	12.0762	5	79.45	7.2853	5
	184	59.25	12.0762	5	78.79	7.59728	5
	188	59.25	12.0762	5	78.13	7.91143	5
	192	59.25	12.0762	5	77.47	8.2275	5
	196	59.25	12.0762	5	76.81	8.54529	5
	200	59.25	12.0762	5	76.15	8.8646	5
	204	59.25	12.0762	5	75.49	9.18528	5
	208	59.25	12.0762	5	74.83	9.50718	5
	212	59.25	12.0762	5	74.17	9.83019	5
	216	59.25	12.0762	5	74.84	9.82196	5
	220	59.25	12.0762	5	75.51	9.82487	5
	224	59.25	12.0762	5	76.18	9.83892	5
	228	59.25	12.0762	5	76.18	9.83892	5
	232	59.25	12.0762	5	76.18	9.83892	5
	236	59.25	12.0762	5	75.5158	9.73775	5
	240	58.5925	11.9454	5	74.8517	9.64719	5
	244	57.935	11.823	5	74.1875	9.56753	5
	248	57.2775	11.7092	5	73.5233	9.49905	5
	252	56.62	11.6043	5	72.1892	9.41266	5
	256	55.9625	11.5085	5	70.855	9.34334	5
	260	55.305	11.422	5	69.5208	9.29145	5
	264	54.6475	11.3451	5	68.1867	9.25729	5
	268	53.99	11.2779	5	66.8525	9.24107	5
	272	53.3325	11.2206	5	65.5183	9.24287	5
	276	52.675	11.1734	5	64.1842	9.26268	5
	280	51.3433	10.9801	5	62.85	9.30039	5
	284	50.0117	10.7988	5	61.5158	9.35579	5
	288	48.68	10.6301	5	60.1817	9.42855	5
	292	47.3483	10.4747	5	58.8475	9.51829	5
	296	46.0167	10.3332	5	57.5133	9.62452	5
	300	44.685	10.206	5	56.1792	9.74671	5
	304	43.3533	10.0939	5	54.845	9.88426	5
	308	42.0217	9.99717	5	53.5108	10.0366	5
	312	40.69	9.91639	5	52.1767	10.2029	5
	316	39.3583	9.85192	5	50.8425	10.3827	5
	320	38.0267	9.80409	5	49.5083	10.5752	5
	324	36.695	9.77313	5	48.1742	10.7797	5
	328	35.3633	9.75922	5	46.84	10.9955	5
	332	34.0317	9.76242	5	45.5058	11.2221	5
	336	32.0567	9.47233	5	44.8358	11.3524	5
	340	30.0817	9.19073	5	44.1658	11.4908	5
	344	28.1067	8.9184	5	43.4958	11.6369	5
	348	26.1317	8.65623	5	43.4958	11.6369	5
	352	24.1567	8.40517	5	43.4958	11.6369	5
	356	22.1817	8.16625	5	44.16	11.5468	5
	360	20.8642	7.80346	5	44.8242	11.4657	5
	364	19.5467	7.44573	5	45.4883	11.3939	5
	368	18.2292	7.09381	5	46.1525	11.3316	5
	372	16.9117	6.74862	5	46.8167	11.279	5
	376	15.5942	6.41124	5	47.4808	11.2361	5
	380	14.2767	6.08298	5	47.4808	11.2361	5
	384	12.9592	5.76539	5	47.4808	11.2361	5
	388	11.6417	5.46034	5	47.4808	11.2361	5
	392	10.3242	5.17004	5	47.4808	11.2361	5
	396	9.00667	4.89711	5	47.4808	11.2361	5
	400	8.36333	4.54732	5	47.4808	11.2361	5
	404	7.72	4.19752	5	47.4808	11.2361	5
	408	7.07667	3.84773	5	47.4808	11.2361	5
	412	6.43333	3.49794	5	47.4808	11.2361	5
	416	5.79	3.14814	5	47.4808	11.2361	5
	420	5.14667	2.79835	5	47.4808	11.2361	5
	424	4.50333	2.44856	5	47.4808	11.2361	5
	428	3.86	2.09876	5	47.4808	11.2361	5
	432	3.21667	1.74897	5	47.4808	11.2361	5
	436	2.57333	1.39918	5	47.4808	11.2361	5
	440	1.93	1.04938	5	47.4808	11.2361	5
	444	1.28667	0.699588	5	47.4808	11.2361	5
	448	0.643333	0.349794	5	47.4808	11.2361	5
	452	0	0	5	47.4808	11.2361	5
	456	0	0	5	46.8167	11.279	5
	460	0	0	5	46.1525	11.3316	5
	464	0	0	5	45.4883	11.3939	5
	468	0	0	5	44.8242	11.4657	5
	472	0	0	5	44.16	11.5468	5
	476	0	0	5	43.4958	11.6369	5
	480	0	0	5	42.8317	11.736	5
	484	0	0	5	42.1675	11.8437	5
	488	0	0	5	41.5033	11.9599	5
	492	0	0	5	40.8392	12.0842	5
	496	0	0	5	40.175	12.2165	5
	500	0	0	5	40.175	12.2165	5
	504	0	0	5	40.175	12.2165	5
	508	0	0	5	40.175	12.2165	5
	512	0	0	5	40.175	12.2165	5
	516	0	0	5	40.175	12.2165	5
	520	0	0	5	40.175	12.2165	5
	524	0	0	5	40.175	12.2165	5
	528	0	0	5	40.175	12.2165	5
	532	0	0	5	40.175	12.2165	5
	536	0	0	5	40.175	12.2165	5
	540	0	0	5	40.175	12.2165	5
	544	0	0	5	40.175	12.2165	5
	548	0	0	5	40.175	12.2165	5
	552	0	0	5	40.175	12.2165	5
	556	0	0	5	40.175	12.2165	5
	560	0	0	5	40.175	12.2165	5
	564	0	0	5	40.175	12.2165	5
	568	0	0	5	40.175	12.2165	5
	572	0	0	5	40.175	12.2165	5
	576	0	0	5	40.175	12.2165	5
	580	0	0	5	40.175	12.2165	5
	584	0	0	5	40.175	12.2165	5
	588	0	0	5	40.175	12.2165	5
	592	0	0	5	40.175	12.2165	5
	596	0	0	5	40.175	12.2165	5
	600	0	0	5	40.175	12.2165	5
	604	0	0	5	40.175	12.2165	5
	608	0	0	5	40.175	12.2165	5
	612	0	0	5	40.175	12.2165	5
	616	0	0	5	40.175	12.2165	5
	620	0	0	5	40.175	12.2165	5
	624	0	0	5	40.175	12.2165	5
	628	0	0	5	40.175	12.2165	5
	632	0	0	5	40.175	12.2165	5
	636	0	0	5	40.175	12.2165	5
	640	0	0	5	40.175	12.2165	5
	644	0	0	5	40.175	12.2165	5
	648	0	0	5	40.175	12.2165	5
	652	0	0	5	40.175	12.2165	5
	656	0	0	5	40.175	12.2165	5
	660	0	0	5	40.175	12.2165	5
	664	0	0	5	40.175	12.2165	5
	668	0	0	5	40.175	12.2165	5
	672	0	0	5	40.175	12.2165	5
	676	0	0	5	40.175	12.2165	5
	680	0	0	5	40.175	12.2165	5
	684	0	0	5	40.175	12.2165	5
	688	0	0	5	40.175	12.2165	5
	692	0	0	5	40.175	12.2165	5
	696	0	0	5	40.175	12.2165	5
	700	0	0	5	40.175	12.2165	5
	704	0	0	5	40.175	12.2165	5
	708	0	0	5	40.175	12.2165	5
	712	0	0	5	40.175	12.2165	5
	716	0	0	5	40.175	12.2165	5
	720	0	0	5	40.175	12.2165	5
	724	0	0	5	40.175	12.2165	5
	728	0	0	5	40.175	12.2165	5
	732	0	0	5	40.175	12.2165	5
	736	0	0	5	40.175	12.2165	5
	740	0	0	5	40.175	12.2165	5
	744	0	0	5	40.175	12.2165	5
	748	0	0	5	40.175	12.2165	5
	752	0	0	5	40.175	12.2165	5
	756	0	0	5	40.175	12.2165	5
	760	0	0	5	40.175	12.2165	5
	764	0	0	5	40.175	12.2165	5
	768	0	0	5	40.175	12.2165	5
	772	0	0	5	40.175	12.2165	5
	776	0	0	5	40.175	12.2165	5
	780	0	0	5	40.175	12.2165	5
	784	0	0	5	40.175	12.2165	5
	788	0	0	5	40.175	12.2165	5
	792	0	0	5	40.175	12.2165	5
	796	0	0	5	40.175	12.2165	5
	800	0	0	5	40.175	12.2165	5
	804	0	0	5	40.175	12.2165	5
	808	0	0	5	40.175	12.2165	5
	812	0	0	5	40.175	12.2165	5
	816	0	0	5	40.175	12.2165	5
	820	0	0	5	40.175	12.2165	5
	824	0	0	5	40.175	12.2165	5
	828	0	0	5	40.175	12.2165	5
	832	0	0	5	40.175	12.2165	5
	836	0	0	5	40.175	12.2165	5
	840	0	0	5	40.175	12.2165	5
	844	0	0	5	40.175	12.2165	5
	848	0	0	5	40.175	12.2165	5
	852	0	0	5	40.175	12.2165	5
	856	0	0	5	40.175	12.2165	5
	860	0	0	5	40.175	12.2165	5
	864	0	0	5	40.175	12.2165	5
	868	0	0	5	40.175	12.2165	5
	872	0	0	5	40.175	12.2165	5
	876	0	0	5	40.175	12.2165	5
	880	0	0	5	40.175	12.2165	5
	884	0	0	5	40.175	12.2165	5
	888	0	0	5	40.175	12.2165	5
	892	0	0	5	40.175	12.2165	5
	896	0	0	5	40.175	12.2165	5
	900	0	0	5	40.175	12.2165	5
	904	0	0	5	40.175	12.2165	5
	908	0	0	5	40.175	12.2165	5
	912	0	0	5	40.175	12.2165	5
	916	0	0	5	40.175	12.2165	5
	920	0	0	5	40.175	12.2165	5
	924	0	0	5	40.175	12.2165	5
	928	0	0	5	40.175	12.2165	5
	932	0	0	5	40.175	12.2165	5
	936	0	0	5	40.175	12.2165	5
	940	0	0	5	40.175	12.2165	5
	944	0	0	5	40.175	12.2165	5
	948	0	0	5	40.175	12.2165	5
	952	0	0	5	40.175	12.2165	5
	956	0	0	5	40.175	12.2165	5
	960	0	0	5	40.175	12.2165	5
	964	0	0	5	40.175	12.2165	5
	968	0	0	5	40.175	12.2165	5
	972	0	0	5	40.175	12.2165	5
	976	0	0	5	40.175	12.2165	5
	980	0	0	5	40.175	12.2165	5
	984	0	0	5	40.175	12.2165	5
	988	0	0	5	40.175	12.2165	5
	992	0	0	5	40.175	12.2165	5
	996	0	0	5	40.175	12.2165	5
	1000	0	0	5	40.175	12.2165	5
	1004	0	0	5	40.175	12.2165	5
	1008	0	0	5	40.175	12.2165	5
	1012	0	0	5	40.175	12.2165	5
	1016	0	0	5	40.175	12.2165	5
	1020	0	0	5	40.175	12.2165	5
	1024	0	0	5	40.175	12.2165	5
	1028	0	0	5	40.175	12.2165	5
	1032	0	0	5	40.175	12.2165	5
	1036	0	0	5	40.175	12.2165	5
	1040	0	0	5	40.175	12.2165	5
	1044	0	0	5	40.175	12.2165	5
	1048	0	0	5	40.175	12.2165	5
	1052	0	0	5	40.175	12.2165	5
	1056	0	0	5	40.175	12.2165	5
	1060	0	0	5	40.175	12.2165	5
	1064	0	0	5	40.175	12.2165	5
	1068	0	0	5	40.175	12.2165	5
	1072	0	0	5	40.175	12.2165	5
	1076	0	0	5	40.175	12.2165	5
	1080	0	0	5	40.175	12.2165	5
	1084	0	0	5	40.175	12.2165	5
	1088	0	0	5	40.175	12.2165	5
	1092	0	0	5	40.175	12.2165	5
	1096	0	0	5	40.175	12.2165	5
	1100	0	0	5	40.175	12.2165	5
	1104	0	0	5	40.175	12.2165	5
	1108	0	0	5	40.175	12.2165	5
	1112	0	0	5	40.175	12.2165	5
	1116	0	0	5	40.175	12.2165	5
	1120	0	0	5	40.175	12.2165	5
	1124	0	0	5	40.175	12.2165	5
	1128	0	0	5	40.175	12.2165	5
	1132	0	0	5	40.175	12.2165	5
	1136	0	0	5	40.175	12.2165	5
	1140	0	0	5	40.175	12.2165	5
	1144	0	0	5	40.175	12.2165	5
	1148	0	0	5	40.175	12.2165	5
	1152	0	0	5	40.175	12.2165	5
	1156	0	0	5	40.175	12.2165	5
	1160	0	0	5	40.175	12.2165	5
	1164	0	0	5	40.175	12.2165	5
	1168	0	0	5	40.175	12.2165	5
	1172	0	0	5	40.175	12.2165	5
	1176	0	0	5	40.175	12.2165	5
	1180	0	0	5	40.175	12.2165	5
	1184	0	0	5	40.175	12.2165	5
	1188	0	0	5	40.175	12.2165	5
	1192	0	0	5	40.175	12.2165	5
	1196	0	0	5	40.175	12.2165	5
	1200	10.0425	2.57768	5	33.6717	10.6333	5
	1204	9.37083	2.32181	5	33.01	10.3879	5
	1208	8.69917	2.08676	5	32.3483	10.1478	5
	1212	8.69917	2.08676	5	31.6867	9.91341	5
	1216	8.69917	2.08676	5	31.025	9.68505	5
	1220	8.69917	2.08676	5	30.3633	9.46319	5
	1224	8.035	1.94388	5	30.36	9.45185	5
	1228	7.37083	1.85141	5	30.3567	9.47108	5
	1232	7.37083	1.85141	5	30.3533	9.52069	5
	1236	7.37083	1.85141	5	29.6917	9.35337	5
	1240	6.70667	1.81706	5	29.03	9.19537	5
	1244	6.0425	1.84408	5	28.3683	9.04718	5
	1248	5.37833	1.92989	5	27.7067	8.9093	5
	1252	5.37833	1.92989	5	27.045	8.7822	5
	1256	4.70667	1.6223	5	26.3833	8.66637	5
	1260	4.035	1.32538	5	25.7217	8.56226	5
	1264	3.36333	1.04824	5	25.06	8.4703	5
	1268	2.69167	0.811398	5	24.3983	8.39089	5
	1272	2.69167	0.811398	5	23.7367	8.32439	5
	1276	2.69167	0.811398	5	23.075	8.27112	5
	1280	2.69167	0.811398	5	23.0717	8.54956	5
	1284	2.69167	0.811398	5	23.0683	8.85193	5
	1288	3.35583	0.743989	5	23.065	9.17589	5
	1292	4.02	0.820736	5	23.0617	9.51921	5
	1296	4.0125	0.97971	5	23.0583	9.87989	5
	1300	4.005	1.34085	5	22.3967	9.91934	5
	1304	4.66917	1.64386	5	21.735	9.97004	5
	1308	5.33333	1.95745	5	21.0733	10.0318	5
	1312	5.9975	2.27725	5	20.4117	10.1045	5
	1316	5.9875	2.62185	5	19.75	10.1878	5
	1320	5.31333	2.68289	5	19.75	10.1878	5
	1324	5.31333	2.68289	5	19.75	10.1878	5
	1328	5.9775	3.01825	5	19.75	10.1878	5
	1332	6.64167	3.35362	5	19.75	10.1878	5
	1336	7.30583	3.68898	5	19.75	10.1878	5
	1340	7.30583	3.68898	5	19.75	10.1878	5
	1344	7.30583	3.68898	5	19.75	10.1878	5
	1348	7.30583	3.68898	5	19.75	10.1878	5
	1352	7.30583	3.68898	5	19.75	10.1878	5
	1356	7.30583	3.68898	5	19.75	10.1878	5
	1360	7.30583	3.68898	5	19.75	10.1878	5
	1364	7.30583	3.68898	5	19.75	10.1878	5
	1368	7.30583	3.68898	5	19.75	10.1878	5
	1372	7.30583	3.68898	5	19.0917	9.84821	5
	1376	7.30583	3.68898	5	19.095	9.42568	5
	1380	7.30583	3.68898	5	19.0983	9.01543	5
	1384	7.30583	3.68898	5	19.0983	9.01543	5
	1388	7.30583	3.68898	5	19.0983	9.01543	5
	1392	7.30583	3.68898	5	19.0983	9.01543	5
	1396	7.30583	3.68898	5	19.0983	9.01543	5
	1400	7.30583	3.68898	5	19.0983	9.01543	5
	1404	7.30583	3.68898	5	19.0983	9.01543	5
	1408	7.31583	3.28863	5	19.0983	9.01543	5
	1412	7.32583	2.92732	5	19.0983	9.01543	5
	1416	7.33583	2.62124	5	19.0983	9.01543	5
	1420	7.335	2.212	5	19.76	8.95671	5
	1424	7.33417	1.8657	5	20.4217	8.91037	5
	1428	7.33333	1.62314	5	21.0833	8.8766	5
	1432	7.3325	1.53433	5	21.745	8.85556	5
	1436	7.33167	1.62468	5	23.0733	8.74121	5
	1440	7.995	1.88309	5	24.4017	8.64477	5
	1444	8.65833	2.16292	5	25.0683	8.55881	5
	1448	8.6575	2.46904	5	25.735	8.48511	5
	1452	8.65667	2.84252	5	26.4017	8.42397	5
	1456	8.65583	3.2603	5	27.0683	8.37567	5
	1460	9.31917	3.58295	5	28.3967	8.33493	5
	1464	9.9825	3.90784	5	29.725	8.31417	5
	1468	11.3058	4.13674	5	31.0533	8.31355	5
	1472	12.6292	4.39213	5	31.72	8.30793	5
	1476	13.9525	4.66967	5	32.3867	8.31569	5
	1480	15.2758	4.96564	5	33.0533	8.3368	5
	1484	16.5992	5.27695	5	33.72	8.37115	5
	1488	17.9225	5.60104	5	34.3867	8.41858	5
	1492	19.2458	5.93581	5	35.7117	8.75766	5
	1496	20.5692	6.27956	5	36.375	9.11757	5
	1500	21.8925	6.63089	5	36.3717	9.4318	5
	1504	23.2158	6.98865	5	36.3717	9.4318	5
	1508	24.5392	7.35192	5	37.0383	9.50589	5
	1512	25.8625	7.7199	5	37.705	9.59101	5
	1516	27.1858	8.09197	5	38.3717	9.68687	5
	1520	28.5092	8.46757	5	39.0383	9.79315	5
	1524	29.1725	8.75751	5	39.705	9.90952	5
	1528	29.1617	9.14696	5	40.3717	10.0356	5
	1532	29.1508	9.54929	5	41.0383	10.1711	5
	1536	29.14	9.96291	5	41.705	10.3156	5
	1540	29.14	9.96291	5	41.71	10.5308	5
	1544	29.14	9.96291	5	41.715	10.7679	5
	1548	29.14	9.96291	5	41.72	11.0256	5
	1552	29.14	9.96291	5	41.725	11.3023	5
	1556	29.14	9.96291	5	40.405	11.1892	5
	1560	29.14	9.96291	5	39.085	11.0902	5
	1564	29.14	9.96291	5	38.4267	10.8842	5
	1568	29.14	9.96291	5	38.4267	10.8842	5
	1572	29.14	9.96291	5	37.76	10.6816	5
	1576	29.14	9.96291	5	37.0933	10.4857	5
	1580	29.14	9.96291	5	36.4317	10.6064	5
	1584	29.14	9.96291	5	35.77	10.7362	5
	1588	28.48	9.89634	5	35.1083	10.875	5
	1592	27.82	9.84096	5	35.1083	10.875	5
	1596	27.16	9.79696	5	35.1083	10.875	5
	1600	26.5	9.76449	5	35.1083	10.875	5
	1604	25.84	9.74368	5	35.1083	10.875	5
	1608	25.18	9.7346	5	35.1083	10.875	5
	1612	24.52	9.73727	5	35.1083	10.875	5
	1616	23.86	9.75169	5	35.1083	10.875	5
	1620	23.2	9.77781	5	36.44	10.9356	5
	1624	22.54	9.81554	5	37.7717	11.011	5
	1628	21.88	9.86473	5	37.7717	11.011	5
	1632	21.22	9.92523	5	37.7717	11.011	5
	1636	20.56	9.99682	5	37.7717	11.011	5
	1640	19.9	10.0793	5	37.1133	10.8113	5
	1644	19.9	10.0793	5	36.455	10.6186	5
	1648	19.9	10.0793	5	36.4617	10.3165	5
	1652	19.9	10.0793	5	37.1267	10.2091	5
	1656	19.9	10.0793	5	37.7917	10.1117	5
	1660	19.9	10.0793	5	38.4567	10.0245	5
	1664	19.9	10.0793	5	37.7983	9.85187	5
	1668	19.9	10.0793	5	37.14	9.68807	5
	1672	19.9	10.0793	5	36.4817	9.53355	5
	1676	19.9	10.0793	5	36.4817	9.53355	5
	1680	19.9	10.0793	5	37.14	9.68807	5
	1684	19.9	10.0793	5	37.7983	9.85187	5
	1688	19.9	10.0793	5	37.7983	9.85187	5
	1692	20.5742	10.0037	5	38.465	10.0856	5
	1696	21.2483	9.93836	5	39.1317	10.3248	5
	1700	21.2483	9.93836	5	39.1317	10.3248	5
	1704	21.2483	9.93836	5	39.1317	10.3248	5
	1708	21.2483	9.93836	5	39.1317	10.3248	5
	1712	21.2483	9.93836	5	39.1317	10.3248	5
	1716	21.2483	9.93836	5	39.1317	10.3248	5
	1720	21.2483	9.93836	5	39.1317	10.3248	5
	1724	21.2483	9.93836	5	39.1317	10.3248	5
	1728	21.2483	9.93836	5	39.1317	10.3248	5
	1732	21.2483	9.93836	5	38.4733	10.1743	5
	1736	21.2483	9.93836	5	37.815	10.0331	5
	1740	21.2483	9.93836	5	36.4917	9.98365	5
	1744	21.2483	9.93836	5	35.1683	9.95084	5
	1748	21.2483	9.93836	5	35.1683	9.95084	5
	1752	21.2483	9.93836	5	35.1683	9.95084	5
	1756	21.2483	9.93836	5	35.1683	9.95084	5
	1760	21.2483	9.93836	5	35.8267	10.0762	5
	1764	21.2483	9.93836	5	35.8267	10.0762	5
	1768	21.2483	9.93836	5	35.1617	10.1789	5
	1772	21.2483	9.93836	5	33.8383	10.163	5
	1776	21.2483	9.93836	5	32.515	10.1636	5
	1780	21.2483	9.93836	5	31.1917	10.1808	5
	1784	21.2483	9.93836	5	31.1917	10.1808	5
	1788	21.2483	9.93836	5	31.1917	10.1808	5
	1792	21.2483	9.93836	5	31.1917	10.1808	5
	1796	21.2483	9.93836	5	31.85	10.2924	5
	1800	21.2483	9.93836	5	31.85	10.2924	5
	1804	21.2483	9.93836	5	31.85	10.2924	5
	1808	21.2483	9.93836	5	31.1917	10.1808	5
	1812	20.5742	10.0037	5	30.5333	10.0794	5
	1816	19.9	10.0793	5	29.875	9.98858	5
	1820	19.9	10.0793	5	29.2167	9.90853	5
	1824	19.9	10.0793	5	28.5583	9.83956	5
	1828	19.9	10.0793	5	27.9	9.78191	5
	1832	19.9	10.0793	5	27.2417	9.73576	5
	1836	19.9	10.0793	5	27.2417	9.73576	5
	1840	19.9	10.0793	5	27.2417	9.73576	5
	1844	19.9	10.0793	5	27.2417	9.73576	5
	1848	19.9	10.0793	5	27.2417	9.73576	5
	1852	19.9	10.0793	5	27.9	9.78191	5
	1856	19.9	10.0793	5	28.5583	9.83956	5
	1860	19.9	10.0793	5	29.2167	9.90853	5
	1864	19.9	10.0793	5	29.875	9.98858	5
	1868	19.2367	9.74329	5	29.875	9.98858	5
	1872	18.5733	9.40731	5	29.875	9.98858	5
	1876	18.5733	9.40731	5	29.875	9.98858	5
	1880	18.5733	9.40731	5	29.875	9.98858	5
	1884	18.5733	9.40731	5	30.5333	10.0794	5
	1888	18.5733	9.40731	5	31.1917	10.1808	5
	1892	18.5733	9.40731	5	31.85	10.2924	5
	1896	18.5733	9.40731	5	32.5083	10.4139	5
	1900	18.5733	9.40731	5	33.1667	10.5449	5
	1904	18.5733	9.40731	5	33.825	10.6851	5
	1908	18.5733	9.40731	5	34.4833	10.8341	5
	1912	18.5733	9.40731	5	35.1417	10.9916	5
	1916	18.5733	9.40731	5	35.1417	10.9916	5
	1920	18.5733	9.40731	5	35.1417	10.9916	5
	1924	18.5733	9.40731	5	34.4833	10.8341	5
	1928	18.5733	9.40731	5	34.4833	10.8341	5
	1932	18.5733	9.40731	5	34.4833	10.8341	5
	1936	18.5733	9.40731	5	34.4833	10.8341	5
	1940	18.5733	9.40731	5	34.4833	10.8341	5
	1944	18.5733	9.40731	5	34.4833	10.8341	5
	1948	18.5733	9.40731	5	34.4833	10.8341	5
	1952	18.5733	9.40731	5	34.4833	10.8341	5
	1956	18.5733	9.40731	5	33.825	10.6851	5
	1960	18.5733	9.40731	5	33.1667	10.5449	5
	1964	18.5733	9.40731	5	32.5083	10.4139	5
	1968	18.5733	9.40731	5	32.5083	10.4139	5
	1972	18.5733	9.40731	5	32.5083	10.4139	5
	1976	18.5733	9.40731	5	32.5083	10.4139	5
	1980	18.5733	9.40731	5	32.5083	10.4139	5
	1984	18.5733	9.40731	5	32.5083	10.4139	5
	1988	19.2367	9.74329	5	32.5083	10.4139	5
	1992	19.9	10.0793	5	32.5083	10.4139	5
	1996	19.9	10.0793	5	32.5083	10.4139	5
	2000	19.9	10.0793	5	32.5083	10.4139	5
	2004	19.9	10.0793	5	32.5083	10.4139	5
	2008	19.9	10.0793	5	32.5083	10.4139	5
	2012	19.9	10.0793	5	32.5083	10.4139	5
	2016	19.9	10.0793	5	32.5083	10.4139	5
	2020	19.9	10.0793	5	32.5083	10.4139	5
	2024	19.9	10.0793	5	32.5083	10.4139	5
	2028	19.9	10.0793	5	32.5083	10.4139	5
	2032	19.9	10.0793	5	32.5083	10.4139	5
	2036	19.9	10.0793	5	31.85	10.2924	5
	2040	19.9	10.0793	5	31.1917	10.1808	5
	2044	19.9	10.0793	5	31.1917	10.1808	5
	2048	19.9	10.0793	5	31.85	10.2924	5
	2052	19.9	10.0793	5	32.5083	10.4139	5
	2056	19.9	10.0793	5	33.1667	10.5449	5
	2060	19.9	10.0793	5	33.825	10.6851	5
	2064	19.9	10.0793	5	34.4833	10.8341	5
	2068	20.56	9.99682	5	35.1417	10.9916	5
	2072	21.22	9.92523	5	35.8	11.1573	5
	2076	21.88	9.86473	5	36.4583	11.3307	5
	2080	21.88	9.86473	5	36.4583	11.3307	5
	2084	21.88	9.86473	5	36.4583	11.3307	5
	2088	21.88	9.86473	5	35.8	11.1573	5
	2092	21.88	9.86473	5	35.8	11.1573	5
	2096	21.88	9.86473	5	35.8	11.1573	5
	2100	21.88	9.86473	5	35.8	11.1573	5
	2104	21.88	9.86473	5	35.1417	10.9916	5
	2108	21.88	9.86473	5	34.4833	10.8341	5
	2112	21.88	9.86473	5	33.825	10.6851	5
	2116	21.88	9.86473	5	33.1667	10.5449	5
	2120	21.88	9.86473	5	32.5083	10.4139	5
	2124	21.88	9.86473	5	31.85	10.2924	5
	2128	21.88	9.86473	5	31.1917	10.1808	5
	2132	22.5517	9.77766	5	30.5333	10.0794	5
	2136	23.2233	9.70102	5	29.875	9.98858	5
	2140	24.5692	9.5392	5	29.875	9.98858	5
	2144	26.5792	9.27871	5	29.875	9.98858	5
	2148	27.9175	9.09033	5	29.875	9.98858	5
	2152	29.2558	8.91659	5	30.5367	9.86229	5
	2156	29.92	8.82921	5	31.8567	9.83302	5
	2160	30.5842	8.75381	5	33.1767	9.82088	5
	2164	31.2483	8.6907	5	34.4967	9.82592	5
	2168	31.9125	8.64016	5	35.1583	9.73504	5
	2172	32.5767	8.60241	5	35.1617	9.55495	5
	2176	33.2408	8.57761	5	35.165	9.40221	5
	2180	33.2408	8.57761	5	35.1683	9.27815	5
	2184	33.2408	8.57761	5	35.1717	9.18396	5
	2188	32.5808	8.70323	5	35.175	9.12055	5
	2192	31.9208	8.84003	5	35.1783	9.08858	5
	2196	31.2608	8.9875	5	35.1817	9.08836	5
	2200	31.2608	8.9875	5	35.8433	9.11377	5
	2204	31.2608	8.9875	5	36.505	9.15154	5
	2208	31.2608	8.9875	5	37.1667	9.20152	5
	2212	31.2608	8.9875	5	37.17	9.27928	5
	2216	31.2608	8.9875	5	37.8317	9.35614	5
	2220	31.2608	8.9875	5	38.4933	9.44441	5
	2224	31.2608	8.9875	5	39.155	9.54379	5
	2228	31.2608	8.9875	5	39.8167	9.65394	5
	2232	31.2608	8.9875	5	40.4783	9.77447	5
	2236	31.2608	8.9875	5	41.14	9.90503	5
	2240	31.2608	8.9875	5	41.8017	10.0452	5
	2244	31.2608	8.9875	5	42.4633	10.1946	5
	2248	31.2608	8.9875	5	43.125	10.3529	5
	2252	30.5892	9.07545	5	44.445	10.477	5
	2256	29.9175	9.17441	5	45.765	10.6156	5
	2260	28.5717	9.35965	5	46.4267	10.7937	5
	2264	26.5617	9.55451	5	47.0883	10.9793	5
	2268	25.2233	9.64971	5	47.75	11.1719	5
	2272	23.885	9.761	5	47.75	11.1719	5
	2276	23.2208	9.78607	5	47.75	11.1719	5
	2280	22.5567	9.82253	5	47.75	11.1719	5
	2284	21.8925	9.87026	5	47.75	11.1719	5
	2288	21.2283	9.9291	5	47.75	11.1719	5
	2292	20.5642	9.99884	5	48.4083	11.1418	5
	2296	19.9	10.0793	5	49.0667	11.1219	5
	2300	19.9	10.0793	5	49.0633	10.9269	5
	2304	19.9	10.0793	5	49.06	10.7553	5
	2308	19.9	10.0793	5	49.0567	10.6082	5
	2312	19.9	10.0793	5	49.0567	10.6082	5
	2316	19.9	10.0793	5	49.0567	10.6082	5
	2320	19.9	10.0793	5	48.395	10.4522	5
	2324	19.9	10.0793	5	47.7333	10.3049	5
	2328	19.9	10.0793	5	47.7333	10.3049	5
	2332	19.9	10.0793	5	47.7333	10.3049	5
	2336	20.5642	9.99884	5	46.4133	10.1365	5
	2340	21.2283	9.9291	5	45.0933	9.98231	5
	2344	21.2283	9.9291	5	44.4317	9.8565	5
	2348	21.9025	9.8469	5	43.77	9.74074	5
	2352	22.5767	9.77501	5	42.4417	9.39682	5
	2356	23.2508	9.71365	5	41.1133	9.05835	5
	2360	23.925	9.66301	5	39.785	8.72596	5
	2364	23.925	9.66301	5	38.4567	8.40038	5
	2368	23.925	9.66301	5	37.1283	8.08244	5
	2372	23.925	9.66301	5	35.1417	7.70582	5
	2376	23.925	9.66301	5	33.155	7.33227	5
	2380	23.925	9.66301	5	31.1683	6.96231	5
	2384	23.925	9.66301	5	29.1817	6.59652	5
	2388	23.925	9.66301	5	27.8617	6.49842	5
	2392	23.925	9.66301	5	26.5417	6.42515	5
	2396	23.925	9.66301	5	25.2217	6.37758	5
	2400	23.925	9.66301	5	23.9017	6.35627	5
	2404	23.925	9.66301	5	22.5817	6.36149	5
	2408	23.925	9.66301	5	21.2617	6.39318	5
	2412	23.925	9.66301	5	19.9417	6.45094	5
	2416	23.925	9.66301	5	18.6217	6.53409	5
	2420	23.925	9.66301	5	17.9633	6.60185	5
	2424	23.925	9.66301	5	17.305	6.6862	5
	2428	23.925	9.66301	5	16.6467	6.78651	5
	2432	23.925	9.66301	5	15.3183	6.48656	5
	2436	23.925	9.66301	5	13.99	6.19915	5
	2440	23.925	9.66301	5	13.3233	5.8676	5
	2444	23.925	9.66301	5	12.6567	5.53629	5
	2448	23.925	9.66301	5	11.3283	5.26024	5
	2452	23.925	9.66301	5	10	5.0025	5
	2456	23.2608	9.74573	5	9.995	4.59471	5
	2460	22.5967	9.83919	5	9.99	4.21451	5
	2464	22.5967	9.83919	5	9.32333	3.88537	5
	2468	21.9225	9.88347	5	8.65667	3.55704	5
	2472	21.2483	9.93836	5	8.65667	3.55704	5
	2476	20.5742	10.0037	5	8.65667	3.55704	5
	2480	19.9	10.0793	5	8.65667	3.55704	5
	2484	19.9	10.0793	5	8.65667	3.55704	5
	2488	19.9	10.0793	5	8.65667	3.55704	5
	2492	19.9	10.0793	5	8.65667	3.55704	5
	2496	19.9	10.0793	5	9.315	3.46486	5
	2500	19.9	10.0793	5	9.97333	3.40421	5
	2504	19.9	10.0793	5	9.97333	3.40421	5
	2508	19.9	10.0793	5	9.30667	3.07966	5
	2512	19.9	10.0793	5	8.64	2.75725	5
	2516	19.9	10.0793	5	8.63167	2.43561	5
	2520	19.9	10.0793	5	8.62333	2.19814	5
	2524	19.9	10.0793	5	7.95667	1.93238	5
	2528	19.9	10.0793	5	7.29	1.69079	5
	2532	19.9	10.0793	5	6.62333	1.48522	5
	2536	19.9	10.0793	5	5.95667	1.33246	5
	2540	19.9	10.0793	5	5.29	1.25198	5
	2544	19.9	10.0793	5	5.28167	1.56242	5
	2548	19.9	10.0793	5	5.94	1.87911	5
	2552	19.9	10.0793	5	7.265	2.15915	5
	2556	19.9	10.0793	5	8.59	2.47571	5
	2560	19.9	10.0793	5	9.915	2.8165	5
	2564	20.5742	10.0037	5	10.5733	3.12569	5
	2568	21.2483	9.93836	5	11.2317	3.44062	5
	2572	21.9225	9.88347	5	11.89	3.75985	5
	2576	22.5967	9.83919	5	11.8867	4.1636	5
	2580	22.5967	9.83919	5	11.8833	4.5949	5
	2584	22.5967	9.83919	5	12.5417	4.92178	5
	2588	22.5967	9.83919	5	13.2	5.25027	5
	2592	22.5967	9.83919	5	13.8583	5.5801	5
	2596	22.5967	9.83919	5	14.5167	5.91103	5
	2600	22.5967	9.83919	5	15.175	6.24289	5
	2604	22.5967	9.83919	5	15.8333	6.57554	5
	2608	22.5967	9.83919	5	16.4917	6.90886	5
	2612	22.5967	9.83919	5	17.15	7.24277	5
	2616	22.5967	9.83919	5	17.15	7.24277	5
	2620	22.5967	9.83919	5	17.15	7.24277	5
	2624	22.5967	9.83919	5	17.8083	7.57719	5
	2628	22.5967	9.83919	5	17.8083	7.57719	5
	2632	22.5967	9.83919	5	17.8083	7.57719	5
	2636	22.5967	9.83919	5	17.15	7.24277	5
	2640	22.5967	9.83919	5	16.4917	6.90886	5
	2644	22.5967	9.83919	5	16.4917	6.90886	5
	2648	22.5967	9.83919	5	16.4917	6.90886	5
	2652	22.5967	9.83919	5	16.4917	6.90886	5
	2656	23.2683	9.74996	5	16.4917	6.90886	5
	2660	23.94	9.67114	5	17.1733	6.82038	5
	2664	23.94	9.67114	5	17.1967	6.41259	5
	2668	23.94	9.67114	5	16.5533	6.06232	5
	2672	23.94	9.67114	5	15.91	5.75611	5
	2676	23.94	9.67114	5	15.2667	5.50134	5
	2680	23.94	9.67114	5	14.6233	5.30541	5
	2684	23.2658	9.72149	5	14.6467	5.04376	5
	2688	22.5917	9.78256	5	14.67	4.82447	5
	2692	21.9175	9.85415	5	14.6933	4.65353	5
	2696	21.2433	9.93605	5	14.6933	4.65353	5
	2700	21.9033	9.84671	5	14.6933	4.65353	5
	2704	22.5633	9.76827	5	15.375	4.78862	5
	2708	23.2233	9.70102	5	16.0567	4.94099	5
	2712	23.2233	9.70102	5	16.0567	4.94099	5
	2716	23.2233	9.70102	5	16.0567	4.94099	5
	2720	23.2233	9.70102	5	15.3983	4.70264	5
	2724	23.2233	9.70102	5	14.74	4.47738	5
	2728	23.2233	9.70102	5	14.0817	4.26727	5
	2732	23.2233	9.70102	5	13.4233	4.07467	5
	2736	23.2233	9.70102	5	12.765	3.90217	5
	2740	23.2233	9.70102	5	12.1067	3.75255	5
	2744	23.2233	9.70102	5	11.4483	3.62862	5
	2748	23.2233	9.70102	5	11.4483	3.62862	5
	2752	23.2233	9.70102	5	12.115	3.51726	5
	2756	23.2233	9.70102	5	13.44	3.54904	5
	2760	23.2233	9.70102	5	14.765	3.62719	5
	2764	23.2233	9.70102	5	16.09	3.74883	5
	2768	23.2233	9.70102	5	17.415	3.90989	5
	2772	23.2233	9.70102	5	18.0733	4.10275	5
	2776	22.5517	9.77766	5	18.7317	4.31376	5
	2780	21.88	9.86473	5	18.7083	4.40292	5
	2784	21.88	9.86473	5	18.685	4.55047	5
	2788	21.88	9.86473	5	18.6617	4.75097	5
	2792	21.88	9.86473	5	17.98	4.69781	5
	2796	21.88	9.86473	5	17.2983	4.66628	5
	2800	21.88	9.86473	5	17.2833	4.66695	5
	2804	21.88	9.86473	5	17.2683	4.72412	5
	2808	22.54	9.81554	5	16.5867	4.76908	5
	2812	23.2	9.77781	5	16.5633	5.14179	5
	2816	23.86	9.75169	5	16.5633	5.14179	5
	2820	23.2	9.77781	5	16.5633	5.14179	5
	2824	22.54	9.81554	5	15.2233	4.92126	5
	2828	21.88	9.86473	5	13.8833	4.72556	5
	2832	21.88	9.86473	5	13.225	4.43012	5
	2836	21.88	9.86473	5	12.5667	4.14145	5
	2840	22.5542	9.77903	5	12.5667	4.14145	5
	2844	23.2283	9.70365	5	13.2333	4.25667	5
	2848	23.2283	9.70365	5	13.9	4.39424	5
	2852	23.2283	9.70365	5	13.9	4.39424	5
	2856	23.2283	9.70365	5	13.9	4.39424	5
	2860	23.2283	9.70365	5	13.9	4.39424	5
	2864	23.2283	9.70365	5	13.9	4.39424	5
	2868	23.2283	9.70365	5	13.9	4.39424	5
	2872	23.2283	9.70365	5	13.2333	4.25667	5
	2876	23.2283	9.70365	5	11.9083	3.86107	5
	2880	23.2283	9.70365	5	10.5833	3.46884	5
	2884	23.2283	9.70365	5	9.25833	3.08126	5
	2888	23.2283	9.70365	5	7.93333	2.70032	5
	2892	23.2283	9.70365	5	7.275	2.40737	5
	2896	23.2283	9.70365	5	6.61667	2.12833	5
	2900	23.2283	9.70365	5	5.95833	1.86944	5
	2904	23.8883	9.64792	5	5.3	1.64027	5
	2908	24.5483	9.60378	5	4.64167	1.45491	5
	2912	25.2083	9.57142	5	4.64167	1.45491	5
	2916	25.8683	9.55095	5	4.64167	1.45491	5
	2920	26.5283	9.54243	5	3.975	1.2302	5
	2924	26.5283	9.54243	5	3.96667	1.35016	5
	2928	25.8683	9.55095	5	4.625	1.65652	5
	2932	25.8683	9.55095	5	4.625	1.65652	5
	2936	25.8683	9.55095	5	3.96667	1.35016	5
	2940	26.5283	9.54243	5	3.30833	1.06417	5
	2944	27.1883	9.54592	5	3.30833	1.06417	5
	2948	28.5225	9.47522	5	3.30833	1.06417	5
	2952	29.8567	9.42169	5	3.30833	1.06417	5
	2956	31.1908	9.38564	5	3.30833	1.06417	5
	2960	30.5167	9.45576	5	3.30833	1.06417	5
	2964	29.8425	9.53663	5	2.64167	0.986894	5
	2968	29.8425	9.53663	5	1.975	1.01878	5
	2972	29.8425	9.53663	5	1.975	1.01878	5
	2976	29.8425	9.53663	5	1.975	1.01878	5
	2980	29.8425	9.53663	5	1.975	1.01878	5
	2984	29.8425	9.53663	5	1.975	1.01878	5
	2988	29.8425	9.53663	5	1.975	1.01878	5
	2992	29.8425	9.53663	5	1.975	1.01878	5
	2996	29.8425	9.53663	5	1.975	1.01878	5
	3000	29.8425	9.53663	5	1.975	1.01878	5
	3004	30.5142	9.41157	5	1.975	1.01878	5
	3008	31.1858	9.29652	5	1.975	1.01878	5
	3012	31.1858	9.29652	5	1.975	1.01878	5
	3016	31.1858	9.29652	5	2.64167	0.986894	5
	3020	31.1858	9.29652	5	3.30833	1.06417	5
	3024	30.5258	9.26495	5	3.96667	1.35016	5
	3028	29.8658	9.24565	5	4.625	1.65652	5
	3032	29.2058	9.23872	5	5.28333	1.97379	5
	3036	28.5458	9.24418	5	5.94167	2.29745	5
	3040	27.8858	9.26201	5	6.6	2.62514	5
	3044	27.8858	9.26201	5	5.94167	2.29745	5
	3048	27.8858	9.26201	5	5.28333	1.97379	5
	3052	27.2258	9.29214	5	4.625	1.65652	5
	3056	26.5658	9.33444	5	4.625	1.65652	5
	3060	25.9058	9.38876	5	4.625	1.65652	5
	3064	25.2458	9.45489	5	4.625	1.65652	5
	3068	23.9117	9.6006	5	4.625	1.65652	5
	3072	22.5775	9.76123	5	4.625	1.65652	5
	3076	21.2433	9.93605	5	4.625	1.65652	5
	3080	21.2433	9.93605	5	5.30667	1.57501	5
	3084	21.2433	9.93605	5	5.98833	1.55699	5
	3088	21.2433	9.93605	5	5.98833	1.55699	5
	3092	21.2433	9.93605	5	5.98833	1.55699	5
	3096	21.2433	9.93605	5	5.98833	1.55699	5
	3100	21.2433	9.93605	5	5.98833	1.55699	5
	3104	21.2433	9.93605	5	5.98833	1.55699	5
	3108	21.2433	9.93605	5	5.98833	1.55699	5
	3112	21.2433	9.93605	5	6.64667	1.86272	5
	3116	21.2433	9.93605	5	7.305	2.17851	5
	3120	21.2433	9.93605	5	7.96333	2.50054	5
	3124	20.5717	10.0025	5	8.62167	2.82668	5
	3128	19.9	10.0793	5	9.28	3.15567	5
	3132	19.9	10.0793	5	9.93833	3.48668	5
	3136	19.9	10.0793	5	9.93	3.88003	5
	3140	19.9	10.0793	5	9.92167	4.30373	5
	3144	19.9	10.0793	5	9.92167	4.30373	5
	3148	19.9	10.0793	5	9.92167	4.30373	5
	3152	19.9	10.0793	5	9.92167	4.30373	5
	3156	19.9	10.0793	5	9.92167	4.30373	5
	3160	19.9	10.0793	5	9.92167	4.30373	5
	3164	19.9	10.0793	5	10.58	4.64	5
	3168	19.9	10.0793	5	11.2383	4.97671	5
	3172	19.9	10.0793	5	11.8967	5.3138	5
	3176	19.9	10.0793	5	12.555	5.65118	5
	3180	19.9	10.0793	5	13.2133	5.98881	5
	3184	19.9	10.0793	5	13.8717	6.32666	5
	3188	19.9	10.0793	5	14.53	6.66468	5
	3192	19.9	10.0793	5	15.1883	7.00285	5
	3196	19.9	10.0793	5	15.8467	7.34116	5
	3200	19.9	10.0793	5	15.8233	7.73871	5
	3204	19.9	10.0793	5	15.8	8.15024	5
	3208	19.9	10.0793	5	16.4583	8.48983	5
	3212	19.9	10.0793	5	17.1167	8.82943	5
	3216	19.9	10.0793	5	17.775	9.16902	5
	3220	19.9	10.0793	5	18.4333	9.50861	5
	3224	19.9	10.0793	5	19.0917	9.84821	5
	3228	19.9	10.0793	5	19.75	10.1878	5
	3232	19.9	10.0793	5	19.75	10.1878	5
	3236	19.9	10.0793	5	19.75	10.1878	5
	3240	19.9	10.0793	5	19.75	10.1878	5
	3244	19.9	10.0793	5	19.75	10.1878	5
	3248	19.9	10.0793	5	19.75	10.1878	5
	3252	19.9	10.0793	5	19.75	10.1878	5
	3256	19.9	10.0793	5	19.75	10.1878	5
	3260	19.9	10.0793	5	19.75	10.1878	5
	3264	19.9	10.0793	5	19.75	10.1878	5
	3268	19.9	10.0793	5	20.4167	10.107	5
	3272	19.9	10.0793	5	21.0833	10.0366	5
	3276	19.9	10.0793	5	21.0833	10.0366	5
	3280	19.9	10.0793	5	21.0833	10.0366	5
	3284	19.9	10.0793	5	21.0833	10.0366	5
	3288	19.9	10.0793	5	21.0833	10.0366	5
	3292	19.9	10.0793	5	21.0833	10.0366	5
	3296	20.56	9.99682	5	21.0833	10.0366	5
	3300	21.22	9.92523	5	21.0833	10.0366	5
	3304	21.88	9.86473	5	21.0833	10.0366	5
	3308	22.54	9.81554	5	20.425	9.6977	5
	3312	23.2	9.77781	5	19.7667	9.35888	5
	3316	23.86	9.75169	5	19.1083	9.02013	5
	3320	24.52	9.73727	5	18.45	8.68144	5
	3324	25.8442	9.62694	5	17.7917	8.34282	5
	3328	27.1683	9.533	5	17.1333	8.00428	5
	3332	28.4925	9.45594	5	16.475	7.66584	5
	3336	29.1525	9.48017	5	15.8167	7.3275	5
	3340	29.8125	9.51639	5	15.1583	6.98929	5
	3344	30.4725	9.56445	5	15.1617	6.5601	5
	3348	31.7967	9.5322	5	15.165	6.14801	5
	3352	33.1208	9.51754	5	14.5067	5.81104	5
	3356	33.7808	9.59533	5	13.8483	5.47439	5
	3360	34.4408	9.68432	5	13.19	5.13812	5
	3364	35.1008	9.78421	5	12.5317	4.80233	5
	3368	35.7608	9.89467	5	11.8733	4.4671	5
	3372	36.4208	10.0153	5	11.88	4.02439	5
	3376	37.0808	10.1459	5	11.8867	3.60681	5
	3380	37.7408	10.2859	5	11.2283	3.27286	5
	3384	38.4008	10.435	5	10.57	2.94021	5
	3388	39.0608	10.5929	5	9.91	2.66178	5
	3392	39.7208	10.759	5	9.25	2.51317	5
	3396	40.3808	10.9331	5	9.25667	2.32859	5
	3400	41.0408	11.1148	5	9.26333	2.25861	5
	3404	41.7008	11.3037	5	8.605	2.07531	5
	3408	42.3608	11.4995	5	7.94667	1.93471	5
	3412	43.0208	11.7018	5	7.28833	1.84662	5
	3416	43.0208	11.7018	5	6.63	1.81866	5
	3420	43.0208	11.7018	5	5.97167	1.85356	5
	3424	43.0208	11.7018	5	5.98	1.85854	5
	3428	43.0208	11.7018	5	7.305	1.69135	5
	3432	43.0208	11.7018	5	7.96333	1.61732	5
	3436	43.0208	11.7018	5	8.62167	1.61289	5
	3440	43.0208	11.7018	5	9.28	1.67862	5
	3444	42.3567	11.8071	5	9.93833	1.80686	5
	3448	41.6925	11.9209	5	10.5967	1.98554	5
	3452	41.0283	12.043	5	11.255	2.20242	5
	3456	41.0283	12.043	5	11.9133	2.44736	5
	3460	41.0283	12.043	5	12.5717	2.71278	5
	3464	41.0283	12.043	5	12.5683	3.1115	5
	3468	39.7008	11.973	5	12.565	3.54711	5
	3472	38.3733	11.9167	5	13.2233	3.84237	5
	3476	38.3733	11.9167	5	13.8817	4.14442	5
	3480	38.3733	11.9167	5	14.54	4.45189	5
	3484	39.0375	11.7791	5	15.1983	4.76372	5
	3488	39.7017	11.6495	5	15.8567	5.07912	5
	3492	39.7017	11.6495	5	15.85	5.38654	5
	3496	39.7017	11.6495	5	15.8433	5.72756	5
	3500	39.7133	11.294	5	16.5017	6.05964	5
	3504	39.725	10.9525	5	17.16	6.39251	5
	3508	39.065	10.749	5	17.1533	6.76803	5
	3512	38.405	10.5524	5	17.1467	7.16386	5
	3516	37.745	10.3631	5	17.14	7.57683	5
	3520	37.085	10.1816	5	17.1333	8.00428	5
	3524	36.425	10.0082	5	17.7917	8.34282	5
	3528	35.765	9.84338	5	18.45	8.68144	5
	3532	35.105	9.68759	5	19.1083	9.02013	5
	3536	34.445	9.54127	5	19.7667	9.35888	5
	3540	33.785	9.40484	5	20.425	9.6977	5
	3544	33.125	9.27876	5	19.7583	9.76755	5
	3548	32.465	9.16345	5	19.095	9.42568	5
	3552	31.805	9.05932	5	19.0983	9.01543	5
	3556	31.145	8.96676	5	19.1017	8.61922	5
	3560	30.485	8.88612	5	18.4433	8.2819	5
	3564	29.825	8.81775	5	17.785	7.94477	5
	3568	29.165	8.76192	5	17.1267	7.60787	5
	3572	28.505	8.71887	5	16.4683	7.27121	5
	3576	27.845	8.68881	5	15.81	6.93484	5
	3580	27.185	8.67185	5	15.1517	6.5988	5
	3584	26.525	8.66808	5	14.4933	6.26314	5
	3588	26.5283	9.00529	5	13.835	5.92793	5
	3592	26.5317	9.36097	5	13.1767	5.59326	5
	3596	25.8717	9.4004	5	12.5183	5.25921	5
	3600	25.2117	9.45178	5	11.86	4.92592	5
	3604	23.8875	9.60257	5	11.2017	4.59355	5
	3608	22.5633	9.76827	5	10.5433	4.26232	5
	3612	21.9033	9.84671	5	9.885	3.93252	5
	3616	21.9033	9.84671	5	9.22667	3.60454	5
	3620	21.8917	9.84154	5	8.56833	3.27893	5
	3624	21.88	9.86473	5	7.91	2.95646	5
	3628	22.54	9.81554	5	7.25167	2.63829	5
	3632	23.2	9.77781	5	6.59333	2.32619	5
	3636	23.86	9.75169	5	5.935	2.02296	5
	3640	24.52	9.73727	5	5.27667	1.73327	5
	3644	25.18	9.7346	5	4.61833	1.46518	5
	3648	25.84	9.74368	5	3.96	1.23285	5
	3652	26.5	9.76449	5	3.30167	1.06006	5
	3656	27.16	9.79696	5	2.64333	0.978873	5
	3660	27.82	9.84096	5	1.985	1.01158	5
	3664	28.48	9.89634	5	1.985	1.01158	5
	3668	29.14	9.96291	5	1.32333	0.674388	5
	3672	29.8	10.0405	5	0.661667	0.337194	5
	3676	30.46	10.1287	5	0	0	5
	3680	31.12	10.2274	5	0	0	5
	3684	31.78	10.3363	5	0	0	5
	3688	33.1042	10.3235	5	0	0	5
	3692	34.4283	10.3271	5	0	0	5
	3696	35.0883	10.4622	5	0	0	5
	3700	35.7483	10.6063	5	0	0	5
	3704	36.4083	10.7592	5	0	0	5
	3708	37.0683	10.9204	5	0	0	5
	3712	37.7283	11.0896	5	0	0	5
	3716	38.3883	11.2664	5	0.658333	0.339593	5
	3720	39.0483	11.4505	5	1.31667	0.679187	5
	3724	39.7083	11.6415	5	1.975	1.01878	5
	3728	40.3683	11.8392	5	2.63333	1.35837	5
	3732	41.0283	12.043	5	3.29167	1.69797	5
	3736	41.0283	12.043	5	3.95	2.03756	5
	3740	41.0283	12.043	5	4.60833	2.37715	5
	3744	41.0283	12.043	5	5.26667	2.71675	5
	3748	41.0283	12.043	5	5.925	3.05634	5
	3752	41.0283	12.043	5	6.58333	3.39593	5
	3756	40.3683	11.8392	5	7.24167	3.73553	5
	3760	39.7083	11.6415	5	7.9	4.07512	5
	3764	39.7083	11.6415	5	8.55833	4.41471	5
	3768	39.7083	11.6415	5	9.21667	4.75431	5
	3772	39.7083	11.6415	5	9.875	5.0939	5
	3776	39.7083	11.6415	5	10.5333	5.43349	5
	3780	39.7083	11.6415	5	11.1917	5.77309	5
	3784	39.7083	11.6415	5	11.85	6.11268	5
	3788	39.7083	11.6415	5	12.5083	6.45227	5
	3792	39.7083	11.6415	5	13.1667	6.79187	5
	3796	39.7083	11.6415	5	13.825	7.13146	5
	3800	39.7083	11.6415	5	14.4833	7.47105	5
	3804	39.7083	11.6415	5	15.1417	7.81065	5
	3808	39.0442	11.7711	5	15.8	8.15024	5
	3812	38.38	11.9087	5	16.4583	8.48983	5
	3816	38.38	11.9087	5	17.1167	8.82943	5
	3820	38.38	11.9087	5	17.775	9.16902	5
	3824	38.38	11.9087	5	18.4333	9.50861	5
	3828	38.38	11.9087	5	19.0917	9.84821	5
	3832	38.38	11.9087	5	19.75	10.1878	5
	3836	38.38	11.9087	5	19.75	10.1878	5
	3840	38.38	11.9087	5	19.75	10.1878	5
	3844	38.38	11.9087	5	19.75	10.1878	5
	3848	38.38	11.9087	5	19.75	10.1878	5
	3852	38.38	11.9087	5	19.75	10.1878	5
	3856	38.38	11.9087	5	19.75	10.1878	5
	3860	38.38	11.9087	5	19.75	10.1878	5
	3864	38.38	11.9087	5	19.75	10.1878	5
	3868	38.38	11.9087	5	19.75	10.1878	5
	3872	38.38	11.9087	5	19.75	10.1878	5
	3876	39.04	12.1068	5	19.75	10.1878	5
	3880	39.7	12.311	5	19.75	10.1878	5
	3884	39.04	12.1068	5	19.75	10.1878	5
	3888	38.38	11.9087	5	19.75	10.1878	5
	3892	37.72	11.717	5	19.75	10.1878	5
	3896	37.06	11.5321	5	19.75	10.1878	5
	3900	36.4	11.3543	5	19.75	10.1878	5
	3904	35.74	11.1838	5	19.75	10.1878	5
	3908	35.7442	10.8858	5	19.75	10.1878	5
	3912	35.7483	10.6063	5	19.75	10.1878	5
	3916	35.0883	10.4622	5	19.75	10.1878	5
	3920	34.4283	10.3271	5	19.75	10.1878	5
	3924	33.7683	10.2015	5	19.75	10.1878	5
	3928	33.1083	10.0857	5	19.75	10.1878	5
	3932	32.4483	9.97996	5	19.75	10.1878	5
	3936	31.7883	9.88473	5	19.75	10.1878	5
	3940	31.1283	9.80026	5	19.75	10.1878	5
	3944	31.1283	9.80026	5	19.75	10.1878	5
	3948	31.1283	9.80026	5	19.75	10.1878	5
	3952	31.1283	9.80026	5	19.75	10.1878	5
	3956	31.1283	9.80026	5	19.75	10.1878	5
	3960	31.8	9.67224	5	19.75	10.1878	5
	3964	32.4717	9.55388	5	19.75	10.1878	5
	3968	32.4717	9.55388	5	19.75	10.1878	5
	3972	32.4717	9.55388	5	19.0917	9.84821	5
	3976	32.4717	9.55388	5	18.4333	9.50861	5
	3980	32.4717	9.55388	5	17.775	9.16902	5
	3984	32.4717	9.55388	5	17.1167	8.82943	5
	3988	32.4717	9.55388	5	16.4583	8.48983	5
	3992	32.4717	9.55388	5	15.8	8.15024	5
	3996	31.8117	9.48446	5	15.1417	7.81065	5
	4000	31.1517	9.42669	5	14.4833	7.47105	5
	4004	31.1517	9.42669	5	13.825	7.13146	5
	4008	31.1517	9.42669	5	13.8317	6.71282	5
	4012	31.1517	9.42669	5	13.8383	6.31181	5
	4016	31.1517	9.42669	5	13.845	5.932	5
	4020	31.1517	9.42669	5	13.8517	5.57773	5
	4024	31.1517	9.42669	5	13.8583	5.25415	5
	4028	30.4875	9.54594	5	13.865	4.96729	5
	4032	29.8233	9.67535	5	13.8717	4.72382	5
	4036	29.8233	9.67535	5	13.8783	4.53075	5
	4040	30.4875	9.54594	5	14.5433	4.65466	5
	4044	31.1517	9.42669	5	15.2083	4.79877	5
	4048	31.1517	9.42669	5	15.8733	4.96132	5
	4052	31.1517	9.42669	5	16.5383	5.14055	5
	4056	31.1517	9.42669	5	17.2033	5.33478	5
	4060	31.1517	9.42669	5	17.21	5.35362	5
	4064	30.4917	9.38078	5	17.2167	5.42543	5
	4068	29.8317	9.3469	5	16.5583	5.28187	5
	4072	29.1717	9.32519	5	15.9	5.1567	5
	4076	28.5117	9.31573	5	15.2417	5.05131	5
	4080	27.18	9.41904	5	14.5833	4.96694	5
	4084	25.8483	9.53876	5	13.925	4.90468	5
	4088	25.1883	9.55963	5	13.2667	4.86539	5
	4092	24.5283	9.59239	5	13.2667	4.86539	5
	4096	23.8683	9.63694	5	13.2667	4.86539	5
	4100	23.2083	9.6931	5	13.2667	4.86539	5
	4104	22.5483	9.76067	5	13.925	4.90468	5
	4108	21.8883	9.83943	5	14.5833	4.96694	5
	4112	21.2283	9.9291	5	15.2417	5.05131	5
	4116	21.2283	9.9291	5	15.9	5.1567	5
	4120	21.2283	9.9291	5	16.5583	5.28187	5
	4124	21.2283	9.9291	5	17.2167	5.42543	5
	4128	21.2283	9.9291	5	17.8917	5.2356	5
	4132	21.2283	9.9291	5	18.5667	5.11502	5
	4136	21.2283	9.9291	5	19.2417	5.06862	5
	4140	21.8925	9.87026	5	19.9167	5.09844	5
	4144	22.5567	9.82253	5	20.5917	5.20316	5
	4148	23.2208	9.78607	5	21.2667	5.37841	5
	4152	23.885	9.761	5	21.9417	5.61759	5
	4156	23.885	9.761	5	22.6167	5.91295	5
	4160	23.2208	9.78607	5	22.6333	5.95641	5
	4164	22.5567	9.82253	5	21.9917	5.75215	5
	4168	22.5567	9.82253	5	21.35	5.60784	5
	4172	22.5567	9.82253	5	20.7083	5.52818	5
	4176	22.5567	9.82253	5	20.0667	5.51598	5
	4180	22.5567	9.82253	5	20.0833	5.79525	5
	4184	22.5567	9.82253	5	20.1	6.10551	5
	4188	22.5567	9.82253	5	20.7817	6.29987	5
	4192	22.5567	9.82253	5	22.13	6.37821	5
	4196	22.5567	9.82253	5	23.4783	6.48097	5
	4200	22.5567	9.82253	5	24.8267	6.607	5
	4204	22.5567	9.82253	5	25.5083	6.83665	5
	4208	22.5567	9.82253	5	26.19	7.07347	5
	4212	22.5567	9.82253	5	26.8717	7.31677	5
	4216	22.5567	9.82253	5	27.5533	7.56593	5
	4220	22.5567	9.82253	5	27.5533	7.56593	5
	4224	22.5567	9.82253	5	26.895	7.43614	5
	4228	22.5567	9.82253	5	26.2367	7.31982	5
	4232	22.5567	9.82253	5	25.5783	7.21762	5
	4236	22.5567	9.82253	5	24.92	7.13014	5
	4240	22.5567	9.82253	5	24.2617	7.05793	5
	4244	22.5567	9.82253	5	23.6033	7.00147	5
	4248	22.5567	9.82253	5	22.2633	6.66163	5
	4252	22.5567	9.82253	5	20.9233	6.32972	5
	4256	22.5567	9.82253	5	19.5833	6.00705	5
	4260	21.8925	9.87026	5	18.2433	5.69521	5
	4264	21.2283	9.9291	5	16.9033	5.39607	5
	4268	20.5642	9.99884	5	15.5633	5.11185	5
	4272	19.9	10.0793	5	14.2233	4.84518	5
	4276	19.9	10.0793	5	12.8833	4.59913	5
	4280	19.9	10.0793	5	11.5433	4.37716	5
	4284	19.9	10.0793	5	10.8617	4.06412	5
	4288	19.9	10.0793	5	10.18	3.75256	5
	4292	19.9	10.0793	5	9.49833	3.44285	5
	4296	19.9	10.0793	5	8.81667	3.13557	5
	4300	19.9	10.0793	5	8.135	2.83148	5
	4304	19.9	10.0793	5	7.45333	2.53176	5
	4308	19.9	10.0793	5	6.77167	2.23814	5
	4312	19.9	10.0793	5	5.42333	1.88766	5
	4316	19.9	10.0793	5	4.075	1.56379	5
	4320	19.9	10.0793	5	2.72667	1.28679	5
	4324	19.9	10.0793	5	2.045	0.965094	5
	4328	19.9	10.0793	5	1.36333	0.643396	5
	4332	19.9	10.0793	5	0.681667	0.321698	5
	4336	19.9	10.0793	5	0	0	5
	4340	19.9	10.0793	5	0	0	5
	4344	19.9	10.0793	5	0.666667	0.3335	5
	4348	19.2367	9.74329	5	1.33333	0.667	5
	4352	18.5733	9.40731	5	2	1.0005	5
	4356	18.5733	9.40731	5	2	1.0005	5
	4360	18.5733	9.40731	5	2	1.0005	5
	4364	18.5733	9.40731	5	2.66667	1.334	5
	4368	18.5733	9.40731	5	3.33333	1.6675	5
	4372	18.5733	9.40731	5	4	2.001	5
	4376	18.5733	9.40731	5	4.66667	2.3345	5
	4380	18.5733	9.40731	5	5.33333	2.668	5
	4384	18.5733	9.40731	5	6	3.0015	5
	4388	18.5733	9.40731	5	6.66667	3.335	5
	4392	18.5733	9.40731	5	7.33333	3.6685	5
	4396	18.5733	9.40731	5	8	4.002	5
	4400	18.5733	9.40731	5	8.66667	4.3355	5
	4404	18.5733	9.40731	5	9.33333	4.669	5
	4408	18.5733	9.40731	5	10	5.0025	5
	4412	18.5733	9.40731	5	10.6667	5.336	5
	4416	18.5733	9.40731	5	11.3333	5.6695	5
	4420	18.5733	9.40731	5	12	6.003	5
	4424	18.5733	9.40731	5	13.325	6.25757	5
	4428	18.5733	9.40731	5	14.65	6.52798	5
	4432	18.5733	9.40731	5	15.975	6.81236	5
	4436	18.5733	9.40731	5	17.3	7.10903	5
	4440	18.5733	9.40731	5	18.625	7.41651	5
	4444	18.5733	9.40731	5	19.2833	7.41149	5
	4448	18.5733	9.40731	5	19.9417	7.42202	5
	4452	18.5733	9.40731	5	20.6	7.44804	5
	4456	18.5733	9.40731	5	21.925	7.79697	5
	4460	18.5733	9.40731	5	23.25	8.15159	5
	4464	18.5733	9.40731	5	23.2417	7.91219	5
	4468	19.2367	9.74329	5	23.2333	7.70241	5
	4472	19.9	10.0793	5	23.225	7.52471	5
	4476	19.9	10.0793	5	23.8833	7.64529	5
	4480	19.9	10.0793	5	24.5417	7.77883	5
	4484	19.9	10.0793	5	24.5333	7.67804	5
	4488	19.9	10.0793	5	24.525	7.61343	5
	4492	19.9	10.0793	5	24.5167	7.58592	5
	4496	19.9	10.0793	5	24.5083	7.59591	5
	4500	19.9	10.0793	5	24.5	7.64327	5
	4504	19.9	10.0793	5	24.4917	7.72729	5
	4508	19.2367	9.74329	5	24.4833	7.84681	5
	4512	18.5733	9.40731	5	24.475	8.00023	5
	4516	17.91	9.07134	5	24.4667	8.18564	5
	4520	17.2467	8.73536	5	24.4583	8.40094	5
	4524	16.5833	8.39939	5	24.45	8.64388	5
	4528	15.92	8.06341	5	24.4417	8.91221	5
	4532	15.2567	7.72744	5	23.775	8.88205	5
	4536	14.5933	7.39146	5	23.1083	8.86434	5
	4540	13.93	7.05549	5	22.4417	8.85917	5
	4544	13.2667	6.71951	5	21.1167	8.53544	5
	4548	12.6033	6.38354	5	19.7917	8.21942	5
	4552	11.94	6.04756	5	18.4667	7.91204	5
	4556	11.2767	5.71158	5	17.1417	7.61434	5
	4560	10.6133	5.37561	5	15.8167	7.3275	5
	4564	10.6133	5.37561	5	15.1583	6.98929	5
	4568	10.6133	5.37561	5	14.5	6.65122	5
	4572	10.6133	5.37561	5	13.8417	6.31331	5
	4576	10.6133	5.37561	5	12.5167	6.03532	5
	4580	9.95	5.03963	5	11.1917	5.77309	5
	4584	9.28667	4.70366	5	10.5333	5.43349	5
	4588	9.28667	4.70366	5	9.875	5.0939	5
	4592	9.28667	4.70366	5	9.21667	4.75431	5
	4596	9.28667	4.70366	5	9.21667	4.75431	5
	4600	9.28667	4.70366	5	9.21667	4.75431	5
	4604	9.28667	4.70366	5	9.21667	4.75431	5
	4608	9.28667	4.70366	5	9.21667	4.75431	5
	4612	9.28667	4.70366	5	9.21667	4.75431	5
	4616	9.28667	4.70366	5	9.21667	4.75431	5
	4620	9.28667	4.70366	5	9.21667	4.75431	5
	4624	9.28667	4.70366	5	9.21667	4.75431	5
	4628	9.95	5.03963	5	9.21667	4.75431	5
	4632	10.6133	5.37561	5	9.21667	4.75431	5
	4636	11.2767	5.71158	5	9.21667	4.75431	5
	4640	11.94	6.04756	5	9.21667	4.75431	5
	4644	12.6033	6.38354	5	9.21667	4.75431	5
	4648	13.2667	6.71951	5	9.21667	4.75431	5
	4652	13.93	7.05549	5	9.875	5.0939	5
	4656	14.5933	7.39146	5	10.5333	5.43349	5
	4660	15.2567	7.72744	5	11.1917	5.77309	5
	4664	15.2567	7.72744	5	11.85	6.11268	5
	4668	15.2567	7.72744	5	12.5083	6.45227	5
	4672	15.2567	7.72744	5	13.1667	6.79187	5
	4676	15.92	8.06341	5	13.825	7.13146	5
	4680	16.5833	8.39939	5	14.4833	7.47105	5
	4684	16.5833	8.39939	5	15.1417	7.81065	5
	4688	16.5833	8.39939	5	15.8	8.15024	5
	4692	16.5833	8.39939	5	16.4583	8.48983	5
	4696	16.5833	8.39939	5	16.4583	8.48983	5
	4700	16.5833	8.39939	5	16.4583	8.48983	5
	4704	16.5833	8.39939	5	16.4583	8.48983	5
	4708	15.92	8.06341	5	16.4583	8.48983	5
	4712	15.92	8.06341	5	17.1167	8.82943	5
	4716	15.92	8.06341	5	17.1167	8.82943	5
	4720	15.92	8.06341	5	17.1167	8.82943	5
	4724	15.92	8.06341	5	17.1167	8.82943	5
	4728	15.92	8.06341	5	17.1167	8.82943	5
	4732	15.92	8.06341	5	17.1167	8.82943	5
	4736	15.92	8.06341	5	17.1167	8.82943	5
	4740	15.92	8.06341	5	17.1167	8.82943	5
	4744	15.92	8.06341	5	17.1167	8.82943	5
	4748	15.92	8.06341	5	17.1167	8.82943	5
	4752	15.92	8.06341	5	17.1167	8.82943	5
	4756	15.92	8.06341	5	17.1167	8.82943	5
	4760	15.92	8.06341	5	17.1167	8.82943	5
	4764	15.92	8.06341	5	17.1167	8.82943	5
	4768	15.92	8.06341	5	17.1167	8.82943	5
	4772	15.92	8.06341	5	17.7817	8.74857	5
	4776	15.2567	7.72744	5	18.4467	8.67988	5
	4780	14.5933	7.39146	5	19.1117	8.62364	5
	4784	14.5933	7.39146	5	19.7767	8.5801	5
	4788	14.5933	7.39146	5	20.4417	8.54946	5
	4792	14.5933	7.39146	5	21.1067	8.53185	5
	4796	13.93	7.05549	5	21.7717	8.52736	5
	4800	13.2667	6.71951	5	22.4367	8.536	5
	4804	13.2667	6.71951	5	23.1017	8.55774	5
	4808	13.2667	6.71951	5	23.7667	8.59247	5
	4812	13.2667	6.71951	5	24.4317	8.64004	5
	4816	13.2667	6.71951	5	25.755	9.00548	5
	4820	13.93	7.05549	5	27.0783	9.37463	5
	4824	14.5933	7.39146	5	28.4017	9.74708	5
	4828	15.2567	7.72744	5	29.725	10.1225	5
	4832	14.5933	7.39146	5	30.39	10.2063	5
	4836	13.93	7.05549	5	31.055	10.3003	5
	4840	13.2667	6.71951	5	31.72	10.4043	5
	4844	12.6033	6.38354	5	32.385	10.5179	5
	4848	11.94	6.04756	5	33.05	10.6408	5
	4852	11.2767	5.71158	5	33.715	10.7728	5
	4856	10.6133	5.37561	5	34.38	10.9134	5
	4860	10.6133	5.37561	5	35.045	11.0623	5
	4864	10.6133	5.37561	5	35.71	11.2193	5
	4868	10.6133	5.37561	5	36.375	11.3839	5
	4872	10.6133	5.37561	5	37.04	11.5559	5
	4876	10.6133	5.37561	5	37.705	11.7349	5
	4880	10.6133	5.37561	5	38.37	11.9207	5
	4884	10.6133	5.37561	5	39.035	12.1128	5
	4888	10.6133	5.37561	5	39.7	12.311	5
	4892	10.6133	5.37561	5	39.7	12.311	5
	4896	11.2767	5.71158	5	39.035	12.1128	5
	4900	11.94	6.04756	5	38.37	11.9207	5
	4904	12.6033	6.38354	5	37.705	11.7349	5
	4908	13.2667	6.71951	5	37.04	11.5559	5
	4912	13.2667	6.71951	5	36.375	11.3839	5
	4916	13.2667	6.71951	5	35.71	11.2193	5
	4920	13.2667	6.71951	5	35.045	11.0623	5
	4924	12.6033	6.38354	5	34.38	10.9134	5
	4928	11.94	6.04756	5	33.715	10.7728	5
	4932	11.94	6.04756	5	33.05	10.6408	5
	4936	11.94	6.04756	5	32.385	10.5179	5
	4940	11.94	6.04756	5	31.72	10.4043	5
	4944	11.94	6.04756	5	31.055	10.3003	5
	4948	11.94	6.04756	5	29.7317	9.91505	5
	4952	12.6033	6.38354	5	28.4083	9.53185	5
	4956	13.2667	6.71951	5	27.085	9.15099	5
	4960	13.93	7.05549	5	26.42	9.07235	5
	4964	14.5933	7.39146	5	25.755	9.00548	5
	4968	15.2567	7.72744	5	25.09	8.95063	5
	4972	15.92	8.06341	5	25.0867	8.79001	5
	4976	16.5833	8.39939	5	25.0833	8.65921	5
	4980	16.5833	8.39939	5	24.4217	8.2345	5
	4984	16.5833	8.39939	5	23.76	7.83787	5
	4988	16.5833	8.39939	5	23.0983	7.47379	5
	4992	16.5833	8.39939	5	22.4367	7.14725	5
	4996	16.5833	8.39939	5	21.775	6.8636	5
	5000	16.5833	8.39939	5	21.7717	6.9452	5
	5004	16.5833	8.39939	5	21.7683	7.06611	5
	5008	16.5833	8.39939	5	21.765	7.22434	5
	5012	16.5833	8.39939	5	21.7617	7.41752	5
	5016	16.5833	8.39939	5	22.4233	7.5041	5
	5020	16.5833	8.39939	5	23.085	7.60466	5
	5024	16.5833	8.39939	5	23.7467	7.71865	5
	5028	16.5833	8.39939	5	24.4083	7.84549	5
	5032	17.2467	8.73536	5	25.07	7.98457	5
	5036	17.91	9.07134	5	25.7317	8.13525	5
	5040	18.5733	9.40731	5	26.3933	8.2969	5
	5044	19.2367	9.74329	5	27.055	8.4689	5
	5048	19.9	10.0793	5	27.7167	8.65063	5
	5052	19.9	10.0793	5	28.3783	8.84149	5
	5056	19.2367	9.74329	5	28.3817	8.83754	5
	5060	18.5733	9.40731	5	28.385	8.86627	5
	5064	18.5733	9.40731	5	28.3883	8.92735	5
	5068	18.5733	9.40731	5	29.05	9.17203	5
	5072	18.5733	9.40731	5	29.7117	9.42242	5
	5076	18.5733	9.40731	5	30.3733	9.67809	5
	5080	18.5733	9.40731	5	30.3767	9.80781	5
	5084	18.5733	9.40731	5	30.38	9.96491	5
	5088	18.5733	9.40731	5	30.3833	10.1481	5
	5092	18.5733	9.40731	5	29.725	10.0605	5
	5096	18.5733	9.40731	5	29.0667	9.98364	5
	5100	18.5733	9.40731	5	29.0667	9.98364	5
	5104	18.5733	9.40731	5	29.0667	9.98364	5
	5108	18.5733	9.40731	5	29.0667	9.98364	5
	5112	18.5733	9.40731	5	29.0667	9.98364	5
	5116	18.5733	9.40731	5	29.7483	9.87263	5
	5120	18.5733	9.40731	5	29.7717	9.7092	5
	5124	18.5733	9.40731	5	29.1133	9.65899	5
	5128	18.5733	9.40731	5	28.455	9.62051	5
	5132	18.5733	9.40731	5	27.7967	9.5939	5
	5136	18.5733	9.40731	5	27.1383	9.57927	5
	5140	18.5733	9.40731	5	26.48	9.57666	5
	5144	18.5733	9.40731	5	25.8217	9.58609	5
	5148	18.5733	9.40731	5	24.5017	9.27693	5
	5152	18.5733	9.40731	5	23.1817	8.97593	5
	5156	18.5733	9.40731	5	21.8617	8.68395	5
	5160	18.5733	9.40731	5	20.5417	8.40193	5
	5164	18.5733	9.40731	5	19.2217	8.13091	5
	5168	18.5733	9.40731	5	17.9017	7.87202	5
	5172	18.5733	9.40731	5	16.5817	7.6265	5
	5176	19.2367	9.74329	5	15.92	7.29049	5
	5180	19.9	10.0793	5	15.2583	6.95459	5
	5184	19.9	10.0793	5	14.5967	6.61883	5
	5188	19.9	10.0793	5	14.6	6.19593	5
	5192	19.9	10.0793	5	14.6033	5.79114	5
	5196	19.9	10.0793	5	14.6067	5.40854	5
	5200	19.9	10.0793	5	14.61	5.05317	5
	5204	19.9	10.0793	5	14.6133	4.73117	5
	5208	19.9	10.0793	5	14.6167	4.44979	5
	5212	19.9	10.0793	5	14.62	4.21717	5
	5216	19.9	10.0793	5	14.6233	4.04173	5
	5220	19.9	10.0793	5	14.6267	3.93114	5
	5224	19.9	10.0793	5	14.63	3.89093	5
	5228	19.9	10.0793	5	14.6333	3.92327	5
	5232	19.9	10.0793	5	14.6367	4.02641	5
	5236	19.9	10.0793	5	13.9583	4.27995	5
	5240	19.9	10.0793	5	13.28	4.60393	5
	5244	19.9	10.0793	5	13.2833	4.86987	5
	5248	19.9	10.0793	5	13.2867	5.1771	5
	5252	19.9	10.0793	5	13.29	5.51873	5
	5256	19.9	10.0793	5	13.2933	5.88876	5
	5260	19.9	10.0793	5	13.2967	6.28219	5
	5264	19.9	10.0793	5	13.3	6.69489	5
	5268	19.9	10.0793	5	14.6317	6.95323	5
	5272	19.9	10.0793	5	15.9633	7.22548	5
	5276	19.9	10.0793	5	17.295	7.51012	5
	5280	19.9	10.0793	5	18.6267	7.80579	5
	5284	19.9	10.0793	5	19.9583	8.1113	5
	5288	19.9	10.0793	5	21.29	8.42557	5
	5292	19.9	10.0793	5	22.6217	8.74765	5
	5296	19.9	10.0793	5	23.9533	9.07672	5
	5300	19.9	10.0793	5	25.285	9.41204	5
	5304	19.9	10.0793	5	26.6167	9.75297	5
	5308	19.9	10.0793	5	27.2833	9.78627	5
	5312	19.9	10.0793	5	27.95	9.83077	5
	5316	19.9	10.0793	5	28.6167	9.88634	5
	5320	19.9	10.0793	5	29.2833	9.95277	5
	5324	19.9	10.0793	5	29.95	10.0299	5
	5328	19.9	10.0793	5	30.6167	10.1174	5
	5332	19.9	10.0793	5	31.2833	10.215	5
	5336	19.9	10.0793	5	31.95	10.3225	5
	5340	19.9	10.0793	5	32.6167	10.4396	5
	5344	19.9	10.0793	5	32.6183	10.3029	5
	5348	19.9	10.0793	5	33.2783	10.0554	5
	5352	19.9	10.0793	5	33.9383	9.84189	5
	5356	19.9	10.0793	5	34.605	10.0117	5
	5360	19.9	10.0793	5	35.2717	10.1896	5
	5364	19.9	10.0793	5	35.9383	10.3752	5
	5368	19.9	10.0793	5	36.605	10.5681	5
	5372	19.9	10.0793	5	37.2717	10.7678	5
	5376	19.2367	9.74329	5	37.9383	10.9741	5
	5380	18.5733	9.40731	5	37.9383	10.9741	5
	5384	17.91	9.07134	5	37.9383	10.9741	5
	5388	17.2467	8.73536	5	37.2717	10.7678	5
	5392	16.5833	8.39939	5	36.605	10.5681	5
	5396	15.92	8.06341	5	35.2733	10.1601	5
	5400	15.2567	7.72744	5	33.9417	9.75228	5
	5404	14.5933	7.39146	5	32.61	9.3445	5
	5408	14.5933	7.39146	5	31.2783	8.93681	5
	5412	14.5933	7.39146	5	29.9467	8.52923	5
	5416	14.5933	7.39146	5	28.615	8.12176	5
	5420	14.5933	7.39146	5	27.2833	7.71444	5
	5424	14.5933	7.39146	5	26.6183	7.50517	5
	5428	14.5933	7.39146	5	25.9533	7.30525	5
	5432	14.5933	7.39146	5	24.6217	6.89829	5
	5436	14.5933	7.39146	5	23.29	6.49155	5
	5440	14.5933	7.39146	5	21.9583	6.08509	5
	5444	14.5933	7.39146	5	20.6267	5.67897	5
	5448	14.5933	7.39146	5	19.295	5.27325	5
	5452	14.5933	7.39146	5	17.9633	4.86805	5
	5456	14.5933	7.39146	5	16.6317	4.4635	5
	5460	14.5933	7.39146	5	15.3	4.05981	5
	5464	14.5933	7.39146	5	14.6333	3.8503	5
	5468	14.5933	7.39146	5	13.3083	3.76289	5
	5472	14.5933	7.39146	5	11.9833	3.7189	5
	5476	14.5933	7.39146	5	10.6517	3.31477	5
	5480	14.5933	7.39146	5	9.32	2.91194	5
	5484	14.5933	7.39146	5	7.98833	2.51104	5
	5488	14.5933	7.39146	5	6.65667	2.11317	5
	5492	14.5933	7.39146	5	5.325	1.72042	5
	5496	15.2567	7.72744	5	3.99333	1.33732	5
	5500	15.92	8.06341	5	3.32833	1.05658	5
	5504	16.5833	8.39939	5	2.66333	0.817579	5
	5508	17.2467	8.73536	5	1.99833	0.66679	5
	5512	17.91	9.07134	5	1.33333	0.667	5
	5516	18.5733	9.40731	5	1.33333	0.667	5
	5520	19.2367	9.74329	5	1.33333	0.667	5
	5524	19.9	10.0793	5	1.33333	0.667	5
	5528	19.9	10.0793	5	1.33333	0.667	5
	5532	19.9	10.0793	5	1.33333	0.667	5
	5536	19.9	10.0793	5	1.99167	0.665905	5
	5540	19.9	10.0793	5	2.65	0.820132	5
	5544	19.2367	9.74329	5	2.64167	0.986894	5
	5548	18.5733	9.40731	5	2.63333	1.35837	5
	5552	17.91	9.07134	5	3.29167	1.69797	5
	5556	17.91	9.07134	5	3.95	2.03756	5
	5560	17.91	9.07134	5	4.60833	2.37715	5
	5564	17.91	9.07134	5	5.26667	2.71675	5
	5568	17.91	9.07134	5	5.925	3.05634	5
	5572	17.91	9.07134	5	6.58333	3.39593	5
	5576	17.91	9.07134	5	7.24167	3.73553	5
	5580	17.91	9.07134	5	7.9	4.07512	5
	5584	17.2467	8.73536	5	8.55833	4.41471	5
	5588	16.5833	8.39939	5	9.21667	4.75431	5
	5592	15.92	8.06341	5	9.875	5.0939	5
	5596	15.2567	7.72744	5	11.1983	5.35643	5
	5600	15.2567	7.72744	5	12.5217	5.63663	5
	5604	15.2567	7.72744	5	13.845	5.932	5
	5608	15.2567	7.72744	5	15.1683	6.2404	5
	5612	15.2567	7.72744	5	16.4917	6.55997	5
	5616	15.2567	7.72744	5	17.815	6.88917	5
	5620	15.2567	7.72744	5	19.1383	7.22669	5
	5624	15.2567	7.72744	5	20.4617	7.5714	5
	5628	15.2567	7.72744	5	21.785	7.92238	5
	5632	15.2567	7.72744	5	23.1083	8.27881	5
	5636	15.2567	7.72744	5	24.4317	8.64004	5
	5640	15.2567	7.72744	5	25.755	9.00548	5
	5644	15.2567	7.72744	5	27.0783	9.37463	5
	5648	15.2567	7.72744	5	28.4017	9.74708	5
	5652	15.2567	7.72744	5	29.0667	9.82573	5
	5656	15.2567	7.72744	5	29.0733	9.62696	5
	5660	15.2567	7.72744	5	29.08	9.45435	5
	5664	15.92	8.06341	5	29.0867	9.30933	5
	5668	15.92	8.06341	5	29.0933	9.19322	5
	5672	15.92	8.06341	5	29.1	9.10712	5
	5676	15.2567	7.72744	5	29.1067	9.05189	5
	5680	14.5933	7.39146	5	29.1133	9.02809	5
	5684	13.93	7.05549	5	29.12	9.03598	5
	5688	13.2667	6.71951	5	29.8083	8.95423	5
	5692	12.6033	6.38354	5	30.4967	8.91578	5
	5696	11.94	6.04756	5	31.185	8.9212	5
	5700	11.2767	5.71158	5	31.8733	8.97041	5
	5704	11.2767	5.71158	5	32.5617	9.0627	5
	5708	11.94	6.04756	5	33.25	9.19676	5
	5712	12.6033	6.38354	5	33.9383	9.37081	5
	5716	13.2667	6.71951	5	33.9617	9.28266	5
	5720	13.2667	6.71951	5	33.985	9.2232	5
	5724	13.2667	6.71951	5	34.0083	9.19298	5
	5728	13.2667	6.71951	5	34.0317	9.19229	5
	5732	13.2667	6.71951	5	34.055	9.22114	5
	5736	13.2667	6.71951	5	34.0783	9.27926	5
	5740	13.2667	6.71951	5	34.1017	9.3661	5
	5744	13.2667	6.71951	5	34.125	9.48086	5
	5748	13.2667	6.71951	5	34.815	9.48252	5
	5752	13.2667	6.71951	5	35.505	9.52531	5
	5756	13.2667	6.71951	5	35.5283	9.72326	5
	5760	13.2667	6.71951	5	35.5517	9.94464	5
	5764	13.2667	6.71951	5	35.575	10.1879	5
	5768	13.2667	6.71951	5	36.265	10.3462	5
	5772	13.2667	6.71951	5	37.6133	10.3822	5
	5776	13.2667	6.71951	5	38.295	10.5219	5
	5780	13.2667	6.71951	5	38.9767	10.6695	5
	5784	13.2667	6.71951	5	39.6583	10.8247	5
	5788	13.93	7.05549	5	40.34	10.9871	5
	5792	14.5933	7.39146	5	41.0217	11.1564	5
	5796	15.2567	7.72744	5	41.7033	11.3323	5
	5800	15.92	8.06341	5	43.0433	11.3647	5
	5804	16.5833	8.39939	5	44.3833	11.4115	5
	5808	17.2467	8.73536	5	45.7033	11.1179	5
	5812	17.2467	8.73536	5	47.0233	10.8318	5
	5816	17.2467	8.73536	5	48.3433	10.5541	5
	5820	17.91	9.07134	5	49.6633	10.2853	5
	5824	18.5733	9.40731	5	50.9833	10.0261	5
	5828	18.5733	9.40731	5	52.3033	9.77731	5
	5832	18.5733	9.40731	5	53.6233	9.53975	5
	5836	18.5733	9.40731	5	54.9433	9.31428	5
	5840	18.5733	9.40731	5	56.2633	9.10178	5
	5844	18.5733	9.40731	5	57.5833	8.90319	5
	5848	18.5733	9.40731	5	58.9033	8.71946	5
	5852	18.5733	9.40731	5	60.2233	8.55154	5
	5856	18.5733	9.40731	5	61.5433	8.40038	5
	5860	18.5733	9.40731	5	62.8633	8.26691	5
	5864	18.5733	9.40731	5	63.525	8.19442	5
	5868	18.5733	9.40731	5	63.52	8.39392	5
	5872	18.5733	9.40731	5	63.515	8.62158	5
	5876	18.5733	9.40731	5	64.835	8.55441	5
	5880	18.5733	9.40731	5	66.155	8.50658	5
	5884	18.5733	9.40731	5	67.475	8.47843	5
	5888	18.5733	9.40731	5	67.47	8.78469	5
	5892	18.5733	9.40731	5	67.465	9.11164	5
	5896	18.5733	9.40731	5	68.1267	9.14858	5
	5900	18.5733	9.40731	5	68.7883	9.19774	5
	5904	18.5733	9.40731	5	69.45	9.25892	5
	5908	18.5733	9.40731	5	70.1117	9.3319	5
	5912	18.5733	9.40731	5	70.7733	9.41639	5
	5916	18.5733	9.40731	5	71.435	9.51209	5
	5920	18.5733	9.40731	5	71.4383	9.66226	5
	5924	18.5733	9.40731	5	71.4417	9.83956	5
	5928	18.5733	9.40731	5	70.7833	9.90853	5
	5932	19.2367	9.74329	5	70.125	9.98858	5
	5936	19.9	10.0793	5	69.4667	10.0794	5
	5940	19.9	10.0793	5	68.8083	10.1808	5
	5944	19.9	10.0793	5	68.15	10.2924	5
	5948	19.9	10.0793	5	67.4917	10.4139	5
	5952	19.9	10.0793	5	66.8333	10.5449	5
	5956	19.9	10.0793	5	66.175	10.6851	5
	5960	19.9	10.0793	5	65.5167	10.8341	5
	5964	19.9	10.0793	5	64.8583	10.9916	5
	5968	19.9	10.0793	5	64.2	11.1573	5
	5972	19.9	10.0793	5	63.5417	11.3307	5
	5976	19.9	10.0793	5	62.8833	11.5114	5
	5980	19.9	10.0793	5	62.225	11.6993	5
	5984	19.9	10.0793	5	62.225	11.6993	5
	5988	19.9	10.0793	5	62.225	11.6993	5
	5992	19.9	10.0793	5	61.5633	11.5605	5
	5996	19.9	10.0793	5	60.2433	11.6239	5
	6000	19.9	10.0793	5	58.9233	11.7014	5
	6004	19.9	10.0793	5	57.6033	11.7927	5
	6008	19.9	10.0793	5	56.9417	11.6862	5
	6012	19.9	10.0793	5	56.28	11.5886	5
	6016	19.9	10.0793	5	55.6183	11.5001	5
	6020	19.9	10.0793	5	54.9567	11.4208	5
	6024	19.9	10.0793	5	54.295	11.351	5
	6028	19.2367	9.74329	5	53.6333	11.2908	5
	6032	18.5733	9.40731	5	52.9717	11.2404	5
	6036	18.5733	9.40731	5	52.31	11.2	5
	6040	18.5733	9.40731	5	51.6483	11.1696	5
	6044	18.5733	9.40731	5	50.9867	11.1493	5
	6048	18.5733	9.40731	5	50.325	11.1392	5
	6052	18.5733	9.40731	5	49.6633	11.1393	5
	6056	18.5733	9.40731	5	49.0017	11.1495	5
	6060	18.5733	9.40731	5	48.34	11.17	5
	6064	18.5733	9.40731	5	47.6783	11.2006	5
	6068	18.5733	9.40731	5	47.675	11.0687	5
	6072	18.5733	9.40731	5	47.6717	10.9616	5
	6076	18.5733	9.40731	5	47.6683	10.88	5
	6080	18.5733	9.40731	5	47.665	10.8246	5
	6084	18.5733	9.40731	5	47.6617	10.7957	5
	6088	18.5733	9.40731	5	47.6583	10.7936	5
	6092	18.5733	9.40731	5	47.655	10.8182	5
	6096	18.5733	9.40731	5	47.6517	10.8694	5
	6100	18.5733	9.40731	5	47.6483	10.9468	5
	6104	18.5733	9.40731	5	47.645	11.0499	5
	6108	18.5733	9.40731	5	47.6417	11.1779	5
	6112	18.5733	9.40731	5	48.3	11.146	5
	6116	18.5733	9.40731	5	48.9583	11.1245	5
	6120	18.5733	9.40731	5	48.9583	11.1245	5
	6124	18.5733	9.40731	5	48.9583	11.1245	5
	6128	18.5733	9.40731	5	48.9583	11.1245	5
	6132	18.5733	9.40731	5	48.9583	11.1245	5
	6136	18.5733	9.40731	5	48.9583	11.1245	5
	6140	18.5733	9.40731	5	48.935	10.9396	5
	6144	18.5733	9.40731	5	48.9117	10.7769	5
	6148	19.2367	9.74329	5	48.23	10.6198	5
	6152	19.9	10.0793	5	47.5483	10.4702	5
	6156	19.9	10.0793	5	47.5483	10.4702	5
	6160	19.9	10.0793	5	47.5483	10.4702	5
	6164	19.9	10.0793	5	47.5483	10.4702	5
	6168	19.9	10.0793	5	47.5483	10.4702	5
	6172	19.9	10.0793	5	47.5483	10.4702	5
	6176	19.9	10.0793	5	47.5483	10.4702	5
	6180	19.9	10.0793	5	47.5483	10.4702	5
	6184	19.9	10.0793	5	47.5483	10.4702	5
	6188	19.9	10.0793	5	46.89	10.461	5
	6192	19.9	10.0793	5	46.2317	10.4627	5
	6196	19.9	10.0793	5	45.5733	10.4755	5
	6200	19.9	10.0793	5	44.915	10.4993	5
	6204	19.9	10.0793	5	44.2567	10.5339	5
	6208	19.9	10.0793	5	43.5983	10.5794	5
	6212	19.2367	9.74329	5	42.94	10.6355	5
	6216	18.5733	9.40731	5	42.2817	10.7021	5
	6220	17.91	9.07134	5	41.6233	10.779	5
	6224	17.2467	8.73536	5	40.965	10.8659	5
	6228	16.5833	8.39939	5	40.3067	10.9627	5
	6232	15.92	8.06341	5	39.6483	11.0691	5
	6236	15.2567	7.72744	5	38.99	11.1848	5
	6240	14.5933	7.39146	5	38.99	11.1848	5
	6244	13.93	7.05549	5	38.99	11.1848	5
	6248	13.2667	6.71951	5	38.99	11.1848	5
	6252	12.6033	6.38354	5	38.99	11.1848	5
	6256	11.94	6.04756	5	38.99	11.1848	5
	6260	11.2767	5.71158	5	39.0133	11.4805	5
	6264	10.6133	5.37561	5	39.0367	11.7919	5
	6268	9.95	5.03963	5	39.7183	11.9756	5
	6272	9.95	5.03963	5	40.4	12.165	5
	6276	9.95	5.03963	5	40.4	12.165	5
	6280	9.95	5.03963	5	40.4	12.165	5
	6284	9.95	5.03963	5	40.4	12.165	5
	6288	9.95	5.03963	5	40.4	12.165	5
	6292	9.95	5.03963	5	40.4	12.165	5
	6296	9.95	5.03963	5	40.4	12.165	5
	6300	9.95	5.03963	5	40.4	12.165	5
	6304	9.95	5.03963	5	40.4	12.165	5
	6308	9.95	5.03963	5	40.4	12.165	5
	6312	9.95	5.03963	5	40.4	12.165	5
	6316	9.95	5.03963	5	40.4	12.165	5
	6320	9.95	5.03963	5	40.4	12.165	5
	6324	9.28667	4.70366	5	40.4	12.165	5
	6328	8.62333	4.36768	5	40.4	12.165	5
	6332	9.28667	4.70366	5	40.4	12.165	5
	6336	9.95	5.03963	5	40.4	12.165	5
	6340	10.6133	5.37561	5	40.4	12.165	5
	6344	11.2767	5.71158	5	40.4	12.165	5
	6348	11.2767	5.71158	5	40.4	12.165	5
	6352	11.2767	5.71158	5	40.4	12.165	5
	6356	11.94	6.04756	5	40.4	12.165	5
	6360	12.6033	6.38354	5	40.4	12.165	5
	6364	13.2667	6.71951	5	40.4	12.165	5
	6368	13.93	7.05549	5	40.4	12.165	5
	6372	14.5933	7.39146	5	40.4	12.165	5
	6376	15.2567	7.72744	5	40.4	12.165	5
	6380	15.92	8.06341	5	40.4	12.165	5
	6384	16.5833	8.39939	5	40.4	12.165	5
	6388	17.2467	8.73536	5	40.4	12.165	5
	6392	17.2467	8.73536	5	40.4	12.165	5
	6396	17.2467	8.73536	5	39.7183	11.9756	5
	6400	16.5833	8.39939	5	39.0367	11.7919	5
	6404	15.92	8.06341	5	38.355	11.6143	5
	6408	15.92	8.06341	5	38.355	11.6143	5
	6412	15.92	8.06341	5	38.355	11.6143	5
	6416	15.92	8.06341	5	37.6733	11.4429	5
	6420	15.92	8.06341	5	36.9917	11.2781	5
	6424	15.92	8.06341	5	36.31	11.1201	5
	6428	15.92	8.06341	5	35.6283	10.9694	5
	6432	15.92	8.06341	5	34.2817	10.5696	5
	6436	15.92	8.06341	5	32.935	10.1703	5
	6440	15.92	8.06341	5	31.5883	9.77151	5
	6444	16.5833	8.39939	5	30.2417	9.37329	5
	6448	17.2467	8.73536	5	29.56	9.23896	5
	6452	17.2467	8.73536	5	28.8783	9.11401	5
	6456	17.2467	8.73536	5	28.1967	8.99883	5
	6460	17.2467	8.73536	5	28.1733	8.76839	5
	6464	17.2467	8.73536	5	28.15	8.56354	5
	6468	17.91	9.07134	5	28.1267	8.38616	5
	6472	18.5733	9.40731	5	28.1033	8.23802	5
	6476	18.5733	9.40731	5	28.08	8.12073	5
	6480	18.5733	9.40731	5	28.0567	8.03563	5
	6484	18.5733	9.40731	5	28.0333	7.98376	5
	6488	18.5733	9.40731	5	28.01	7.96576	5
	6492	18.5733	9.40731	5	27.9867	7.98187	5
	6496	18.5733	9.40731	5	27.9633	8.03187	5
	6500	18.5733	9.40731	5	27.94	8.11515	5
	6504	18.5733	9.40731	5	27.9167	8.23068	5
	6508	18.5733	9.40731	5	27.8933	8.37715	5
	6512	18.5733	9.40731	5	27.87	8.55295	5
	6516	18.5733	9.40731	5	28.5283	8.65203	5
	6520	19.2367	9.74329	5	29.1867	8.76317	5
	6524	19.9	10.0793	5	29.845	8.88589	5
	6528	19.9	10.0793	5	29.8217	9.12857	5
	6532	19.9	10.0793	5	29.7983	9.39394	5
	6536	19.9	10.0793	5	30.4567	9.55042	5
	6540	19.9	10.0793	5	31.115	9.71624	5
	6544	19.9	10.0793	5	31.7733	9.89095	5
	6548	19.9	10.0793	5	31.7733	9.89095	5
	6552	19.9	10.0793	5	32.4383	10.1229	5
	6556	19.9	10.0793	5	33.1033	10.3604	5
	6560	19.9	10.0793	5	33.7683	10.6032	5
	6564	19.9	10.0793	5	34.4333	10.8509	5
	6568	19.9	10.0793	5	34.4333	10.8509	5
	6572	19.9	10.0793	5	34.4333	10.8509	5
	6576	20.5642	9.99884	5	34.4333	10.8509	5
	6580	21.2283	9.9291	5	34.4417	10.5712	5
	6584	21.8925	9.87026	5	34.45	10.3117	5
	6588	22.5567	9.82253	5	34.4583	10.0738	5
	6592	23.2208	9.78607	5	34.4667	9.85909	5
	6596	23.885	9.761	5	33.8083	9.75542	5
	6600	24.5492	9.74741	5	33.15	9.66257	5
	6604	25.2133	9.74534	5	33.1583	9.49912	5
	6608	25.8775	9.75481	5	33.1667	9.36328	5
	6612	26.5417	9.77579	5	33.175	9.25628	5
	6616	27.2058	9.80819	5	33.1833	9.17912	5
	6620	27.87	9.85191	5	33.1917	9.13256	5
	6624	28.5342	9.9068	5	33.2	9.11707	5
	6628	29.1983	9.97266	5	33.2083	9.1328	5
	6632	29.8625	10.0493	5	33.2167	9.1796	5
	6636	30.5267	10.1364	5	33.2183	8.9154	5
	6640	30.5275	9.95242	5	33.22	8.67539	5
	6644	30.5283	9.79385	5	33.2217	8.46164	5
	6648	29.865	9.52615	5	33.2233	8.27619	5
	6652	29.865	9.52615	5	33.225	8.12096	5
	6656	29.865	9.52615	5	33.2267	7.99773	5
	6660	29.865	9.52615	5	33.2283	7.90799	5
	6664	29.865	9.52615	5	33.23	7.85288	5
	6668	29.865	9.52615	5	33.89	7.80088	5
	6672	29.865	9.52615	5	34.55	7.79939	5
	6676	29.865	9.52615	5	35.21	7.84844	5
	6680	29.865	9.52615	5	36.5317	7.7545	5
	6684	29.865	9.52615	5	37.8533	7.71785	5
	6688	29.865	9.52615	5	39.175	7.73934	5
	6692	29.865	9.52615	5	39.8383	7.77726	5
	6696	29.2008	9.4003	5	40.5017	7.86521	5
	6700	28.5367	9.28487	5	40.4983	7.71858	5
	6704	27.8725	9.18024	5	40.495	7.60649	5
	6708	27.2083	9.08679	5	40.4917	7.53047	5
	6712	26.5442	9.00487	5	41.17	7.28608	5
	6716	25.88	8.93479	5	42.515	7.38788	5
	6720	25.2158	8.87683	5	43.1783	7.7261	5
	6724	24.5517	8.83124	5	43.175	7.79786	5
	6728	23.8875	8.79821	5	43.1717	7.90492	5
	6732	23.2233	8.77787	5	43.1683	8.04588	5
	6736	22.5592	8.77032	5	43.83	8.06719	5
	6740	21.895	8.77559	5	43.825	7.82331	5
	6744	21.2308	8.79365	5	43.82	7.60876	5
	6748	20.5667	8.82443	5	43.815	7.42609	5
	6752	19.9025	8.8678	5	43.81	7.27768	5
	6756	19.2383	8.92357	5	43.8117	7.0071	5
	6760	19.2375	9.32727	5	43.8133	6.80966	5
	6764	19.2367	9.74329	5	43.815	6.69185	5
	6768	19.9	10.0793	5	43.8167	6.65788	5
	6772	19.9	10.0793	5	43.8183	6.70904	5
	6776	19.9	10.0793	5	43.82	6.84341	5
	6780	19.9	10.0793	5	43.8217	7.05624	5
	6784	19.9	10.0793	5	43.8233	7.34071	5
[truncated: 1,004 more rows]
