# Supplementary material for: Microglia facilitate and stabilize the response to general anesthesia via modulating the neuronal network in a brain region-specific manner
Source: eLife. 2023 Dec 22;12:RP92252. doi: 10.7554/eLife.92252 (PMC10746144; doi:10.7554/eLife.92252)
Supplement: Figure 6—source data 1. [file elife-92252-fig6-data1.xlsx]

## Sheet: Figure 6C
	Induction time				Emergence time
	D7	D21	Statistical test		D7	D21	Statistical test
	104	104	paired t test		40	37	paired t test
	72	84			40	40
	72	80			44	36
	86	92			43	37
	76	88			45	33
	72	120			32	32
	80	112			45	33
	60	84			60	40
	96	80			40	31
	64	64			50	40
	44	52			50	43
	60	83			61	51
