# Supplementary material for: Microglia facilitate and stabilize the response to general anesthesia via modulating the neuronal network in a brain region-specific manner
Source: eLife. 2023 Dec 22;12:RP92252. doi: 10.7554/eLife.92252 (PMC10746144; doi:10.7554/eLife.92252)
Supplement: Figure 6—source data 2. [file elife-92252-fig6-data2.xlsx]

## Sheet: Figure 6D
		Normalized power during consciousness									Normalized power during induction									Normalized power during emergence
		D7			D21			Statistical test			D7			D21			Statistical test			D7			D21			Statistical test
	Frequency	Mean	SEM	N	Mean	SEM	N	paired t test		Frequency	Mean	SEM	N	Mean	SEM	N	paired t test		Frequency	Mean	SEM	N	Mean	SEM	N	paired t test
	0	0.048182	0.005678	12	0.057943	0.006673	12			0	0.036435	0.006316	12	0.014029	0.002271	12			0	0.054088	0.006497	12	0.063006	0.011882	12
	0.061035	0.048484	0.005651	12	0.058189	0.006636	12			0.061035	0.037317	0.006573	12	0.015023	0.002711	12			0.061035	0.054645	0.00645	12	0.063216	0.011878	12
	0.12207	0.049259	0.005574	12	0.058807	0.006551	12			0.12207	0.04011	0.007469	12	0.017752	0.003965	12			0.12207	0.056681	0.006435	12	0.063763	0.011791	12
	0.183105	0.050323	0.005478	12	0.059579	0.00645	12			0.183105	0.045651	0.009335	12	0.021516	0.005433	12			0.183105	0.060792	0.006659	12	0.064601	0.011513	12
	0.244141	0.051731	0.005426	12	0.060452	0.006328	12			0.244141	0.05542	0.012212	12	0.025919	0.006455	12			0.244141	0.067034	0.00716	12	0.065948	0.011078	12
	0.305176	0.053691	0.005467	12	0.061585	0.006162	12			0.305176	0.069961	0.015612	12	0.032023	0.007092	12			0.305176	0.074903	0.007717	12	0.068068	0.010589	12
	0.366211	0.05625	0.005584	12	0.063191	0.005974	12			0.366211	0.087696	0.01902	12	0.041764	0.008228	12			0.366211	0.084001	0.008104	12	0.070898	0.010052	12
	0.427246	0.059274	0.005693	12	0.065405	0.005823	12			0.427246	0.106333	0.021854	12	0.055426	0.010187	12			0.427246	0.094303	0.00834	12	0.074127	0.009383	12
	0.488281	0.062741	0.005739	12	0.068283	0.005743	12			0.488281	0.125233	0.023853	12	0.070805	0.012285	12			0.488281	0.105606	0.008519	12	0.077635	0.008625	12
	0.549316	0.066847	0.005777	12	0.0718	0.005722	12			0.549316	0.145265	0.025176	12	0.086074	0.013949	12			0.549316	0.117086	0.008641	12	0.081622	0.007981	12
	0.610352	0.071696	0.005898	12	0.075794	0.005739	12			0.610352	0.16641	0.025645	12	0.102288	0.015324	12			0.610352	0.127826	0.008625	12	0.086225	0.00756	12
	0.671387	0.077026	0.006102	12	0.079979	0.005792	12			0.671387	0.187033	0.024936	12	0.121102	0.017009	12			0.671387	0.137665	0.008479	12	0.091187	0.007254	12
	0.732422	0.08237	0.006273	12	0.084123	0.00586	12			0.732422	0.206009	0.02347	12	0.140805	0.019005	12			0.732422	0.147092	0.0084	12	0.095979	0.006899	12
	0.793457	0.087414	0.006295	12	0.088131	0.005891	12			0.793457	0.224096	0.022143	12	0.157308	0.020258	12			0.793457	0.156269	0.008551	12	0.100168	0.006465	12
	0.854492	0.092079	0.006166	12	0.091895	0.005839	12			0.854492	0.241969	0.021445	12	0.169401	0.020311	12			0.854492	0.164618	0.008816	12	0.103604	0.006053	12
	0.915527	0.096314	0.005968	12	0.095152	0.005715	12			0.915527	0.257996	0.021113	12	0.180404	0.020068	12			0.915527	0.171599	0.00892	12	0.106404	0.005759	12
	0.976563	0.100014	0.00574	12	0.097685	0.005582	12			0.976563	0.269704	0.020581	12	0.193318	0.020318	12			0.976563	0.177471	0.008829	12	0.10884	0.005601	12
	1.0376	0.103171	0.005454	12	0.099628	0.005505	12			1.0376	0.277127	0.019953	12	0.206601	0.020949	12			1.0376	0.182833	0.008778	12	0.111114	0.005514	12
	1.09863	0.105967	0.005112	12	0.10135	0.005468	12			1.09863	0.282931	0.019721	12	0.216772	0.021395	12			1.09863	0.187675	0.008885	12	0.113132	0.005421	12
	1.15967	0.108601	0.004773	12	0.102961	0.005384	12			1.15967	0.289006	0.01965	12	0.223569	0.021612	12			1.15967	0.191474	0.008987	12	0.1146	0.005302	12
	1.2207	0.111113	0.004503	12	0.104155	0.005231	12			1.2207	0.294643	0.018801	12	0.22981	0.021989	12			1.2207	0.194193	0.008911	12	0.115431	0.005211	12
	1.28174	0.113434	0.004274	12	0.104704	0.0051	12			1.28174	0.298755	0.017271	12	0.236791	0.022393	12			1.28174	0.196532	0.008742	12	0.115963	0.005187	12
	1.34277	0.115541	0.004058	12	0.104899	0.005085	12			1.34277	0.302104	0.016124	12	0.242811	0.022238	12			1.34277	0.1989	0.008653	12	0.116607	0.005183	12
	1.40381	0.117488	0.003916	12	0.105242	0.005155	12			1.40381	0.305752	0.015863	12	0.246693	0.021442	12			1.40381	0.200657	0.008578	12	0.117373	0.005149	12
	1.46484	0.119302	0.003898	12	0.105815	0.005202	12			1.46484	0.308369	0.016115	12	0.249965	0.020871	12			1.46484	0.200844	0.008266	12	0.117958	0.005099	12
	1.52588	0.120965	0.003972	12	0.106271	0.005182	12			1.52588	0.307128	0.016046	12	0.253879	0.02103	12			1.52588	0.19937	0.007718	12	0.118224	0.005068	12
	1.58691	0.122468	0.004093	12	0.106459	0.005154	12			1.58691	0.301172	0.01534	12	0.256259	0.02128	12			1.58691	0.196915	0.00729	12	0.118345	0.005023	12
	1.64795	0.123837	0.004304	12	0.106656	0.00519	12			1.64795	0.292433	0.013898	12	0.253719	0.020846	12			1.64795	0.193822	0.007195	12	0.118435	0.004894	12
	1.70898	0.125107	0.004642	12	0.107051	0.005301	12			1.70898	0.28268	0.012348	12	0.246334	0.01997	12			1.70898	0.189725	0.007239	12	0.118307	0.004668	12
	1.77002	0.126318	0.005076	12	0.107361	0.005435	12			1.77002	0.271466	0.01206	12	0.237779	0.019303	12			1.77002	0.184457	0.007135	12	0.117769	0.004385	12
	1.83106	0.127495	0.005563	12	0.107257	0.005533	12			1.83106	0.25785	0.013396	12	0.230557	0.018866	12			1.83106	0.178769	0.006823	12	0.116973	0.004122	12
	1.89209	0.128557	0.006039	12	0.106941	0.005586	12			1.89209	0.242722	0.015009	12	0.223022	0.018106	12			1.89209	0.173708	0.006433	12	0.116257	0.003953	12
	1.95312	0.129293	0.006434	12	0.106886	0.00566	12			1.95312	0.227974	0.015536	12	0.212153	0.016349	12			1.95312	0.169565	0.006086	12	0.115716	0.00388	12
	2.01416	0.129583	0.006734	12	0.107124	0.005833	12			2.01416	0.2141	0.014962	12	0.197993	0.014093	12			2.01416	0.165881	0.005784	12	0.115165	0.003858	12
	2.07519	0.129664	0.007031	12	0.107205	0.006073	12			2.07519	0.200137	0.013937	12	0.183887	0.012392	12			2.07519	0.162377	0.005481	12	0.114493	0.003836	12
	2.13623	0.12999	0.007423	12	0.106916	0.006274	12			2.13623	0.18582	0.012602	12	0.172729	0.011264	12			2.13623	0.159397	0.005207	12	0.11388	0.003831	12
	2.19727	0.130726	0.007907	12	0.106594	0.00637	12			2.19727	0.172471	0.010396	12	0.164294	0.010344	12			2.19727	0.157329	0.004997	12	0.113568	0.003893	12
	2.2583	0.131542	0.008366	12	0.106525	0.006425	12			2.2583	0.161576	0.008079	12	0.156492	0.009413	12			2.2583	0.155956	0.004833	12	0.113567	0.00401	12
	2.31934	0.132047	0.008712	12	0.106421	0.006543	12			2.31934	0.153553	0.006732	12	0.148205	0.008722	12			2.31934	0.154662	0.004686	12	0.113668	0.004133	12
	2.38037	0.132295	0.008983	12	0.105841	0.00672	12			2.38037	0.148119	0.006155	12	0.140139	0.008491	12			2.38037	0.153106	0.00456	12	0.113676	0.004214	12
	2.44141	0.132637	0.00924	12	0.104897	0.00689	12			2.44141	0.144658	0.006589	12	0.133356	0.008304	12			2.44141	0.151463	0.00449	12	0.113549	0.004241	12
	2.50244	0.133116	0.009505	12	0.104143	0.007002	12			2.50244	0.141727	0.007029	12	0.127951	0.008014	12			2.50244	0.150034	0.004489	12	0.113327	0.004259	12
	2.56348	0.133334	0.009718	12	0.103835	0.007131	12			2.56348	0.137415	0.007182	12	0.123358	0.008027	12			2.56348	0.148849	0.004508	12	0.113014	0.004298	12
	2.62451	0.133011	0.009847	12	0.103701	0.007369	12			2.62451	0.131322	0.007153	12	0.119343	0.008428	12			2.62451	0.147713	0.004506	12	0.112554	0.004339	12
	2.68555	0.132386	0.009936	12	0.103485	0.0077	12			2.68555	0.125495	0.006809	12	0.11607	0.008653	12			2.68555	0.146477	0.004545	12	0.111948	0.004361	12
	2.74658	0.131847	0.009993	12	0.103298	0.008037	12			2.74658	0.122127	0.006699	12	0.113324	0.008498	12			2.74658	0.145147	0.004685	12	0.111329	0.004382	12
	2.80762	0.131382	0.009994	12	0.103276	0.008304	12			2.80762	0.120582	0.007015	12	0.110271	0.00824	12			2.80762	0.143785	0.004851	12	0.110857	0.004433	12
	2.86865	0.130718	0.009911	12	0.103237	0.008534	12			2.86865	0.117937	0.007264	12	0.106362	0.008095	12			2.86865	0.142413	0.00491	12	0.110474	0.0045	12
	2.92969	0.129887	0.009798	12	0.102971	0.008827	12			2.92969	0.112563	0.007005	12	0.102229	0.008101	12			2.92969	0.141004	0.004847	12	0.109891	0.004553	12
	2.99072	0.129236	0.009746	12	0.102677	0.009241	12			2.99072	0.105915	0.006453	12	0.099232	0.008196	12			2.99072	0.139497	0.004774	12	0.108952	0.004575	12
	3.05176	0.128812	0.009738	12	0.102763	0.009768	12			3.05176	0.100316	0.006335	12	0.097956	0.008244	12			3.05176	0.137832	0.004745	12	0.107935	0.004612	12
	3.11279	0.128137	0.009682	12	0.103277	0.01037	12			3.11279	0.096178	0.00667	12	0.097389	0.008146	12			3.11279	0.136022	0.004688	12	0.107274	0.004728	12
	3.17383	0.126877	0.009523	12	0.103834	0.011025	12			3.17383	0.092417	0.006758	12	0.095898	0.008035	12			3.17383	0.134212	0.004538	12	0.106972	0.004923	12
	3.23486	0.12544	0.009352	12	0.104143	0.011704	12			3.23486	0.088793	0.006496	12	0.093069	0.007966	12			3.23486	0.132572	0.004366	12	0.106531	0.00512	12
	3.2959	0.124508	0.009291	12	0.10432	0.012351	12			3.2959	0.086351	0.0062	12	0.090284	0.008075	12			3.2959	0.131091	0.004276	12	0.105598	0.005248	12
	3.35693	0.124074	0.0093	12	0.104589	0.01293	12			3.35693	0.085565	0.006235	12	0.08923	0.008583	12			3.35693	0.129566	0.004257	12	0.104438	0.005343	12
	3.41797	0.12339	0.009201	12	0.104911	0.013492	12			3.41797	0.085392	0.006707	12	0.089914	0.009192	12			3.41797	0.127873	0.004205	12	0.103554	0.005469	12
	3.479	0.121945	0.0089	12	0.10509	0.014106	12			3.479	0.084734	0.007162	12	0.09059	0.009547	12			3.479	0.126161	0.004084	12	0.102993	0.00563	12
	3.54004	0.120094	0.008527	12	0.105119	0.014744	12			3.54004	0.083851	0.00726	12	0.089871	0.009564	12			3.54004	0.124648	0.003982	12	0.102357	0.005765	12
	3.60107	0.118497	0.008266	12	0.105217	0.015284	12			3.60107	0.083486	0.006954	12	0.08853	0.009524	12			3.60107	0.123247	0.003966	12	0.101435	0.00585	12
	3.66211	0.11724	0.00813	12	0.105537	0.015675	12			3.66211	0.083278	0.006479	12	0.08863	0.009983	12			3.66211	0.121631	0.00402	12	0.100478	0.005937	12
	3.72315	0.11587	0.007969	12	0.105975	0.016001	12			3.72315	0.082218	0.006096	12	0.090901	0.010992	12			3.72315	0.119714	0.004088	12	0.099774	0.006067	12
	3.78418	0.114142	0.007689	12	0.10627	0.016321	12			3.78418	0.08056	0.00598	12	0.093735	0.011905	12			3.78418	0.117841	0.004138	12	0.099259	0.006225	12
	3.84522	0.112322	0.00735	12	0.106218	0.016542	12			3.84522	0.079979	0.006385	12	0.095257	0.012308	12			3.84522	0.116308	0.004219	12	0.098736	0.006388	12
	3.90625	0.110731	0.007049	12	0.105785	0.016509	12			3.90625	0.08133	0.007322	12	0.095882	0.012429	12			3.90625	0.114892	0.004371	12	0.098225	0.006554	12
	3.96728	0.109362	0.006799	12	0.105106	0.016218	12			3.96728	0.083164	0.008497	12	0.09796	0.012586	12			3.96728	0.113148	0.004595	12	0.097845	0.006729	12
	4.02832	0.108083	0.006546	12	0.104378	0.015845	12			4.02832	0.083405	0.009298	12	0.102825	0.01302	12			4.02832	0.111087	0.004848	12	0.097498	0.006877	12
	4.08936	0.106932	0.006302	12	0.103706	0.015553	12			4.08936	0.082031	0.009519	12	0.109047	0.01434	12			4.08936	0.109209	0.005046	12	0.09698	0.006957	12
	4.15039	0.105966	0.006132	12	0.103036	0.015316	12			4.15039	0.081	0.009581	12	0.11408	0.016829	12			4.15039	0.107779	0.005138	12	0.096353	0.006988	12
	4.21143	0.105012	0.006023	12	0.102268	0.014981	12			4.21143	0.08152	0.00986	12	0.117014	0.019274	12			4.21143	0.106459	0.005149	12	0.095898	0.007039	12
	4.27246	0.103847	0.005877	12	0.101378	0.014443	12			4.27246	0.082513	0.010265	12	0.118877	0.020736	12			4.27246	0.104871	0.005178	12	0.095688	0.007152	12
	4.3335	0.102559	0.005633	12	0.100366	0.013725	12			4.3335	0.082317	0.010376	12	0.120494	0.021721	12			4.3335	0.103234	0.005293	12	0.095474	0.007315	12
	4.39453	0.101449	0.005379	12	0.099146	0.012914	12			4.39453	0.081039	0.010177	12	0.121269	0.02277	12			4.39453	0.102053	0.005457	12	0.095065	0.007488	12
	4.45557	0.100582	0.005237	12	0.097629	0.012074	12			4.45557	0.080237	0.010071	12	0.120616	0.023671	12			4.45557	0.101327	0.005591	12	0.094586	0.007633	12
	4.5166	0.099685	0.005212	12	0.095898	0.011225	12			4.5166	0.080589	0.010166	12	0.119586	0.023926	12			4.5166	0.100499	0.005675	12	0.094199	0.007723	12
	4.57764	0.098551	0.005203	12	0.094194	0.010345	12			4.57764	0.081029	0.010185	12	0.119805	0.023647	12			4.57764	0.099246	0.00578	12	0.093813	0.007764	12
	4.63867	0.097324	0.005136	12	0.092647	0.009414	12			4.63867	0.08041	0.009966	12	0.120981	0.023528	12			4.63867	0.097878	0.005965	12	0.093256	0.007782	12
	4.69971	0.096263	0.005059	12	0.091149	0.008456	12			4.69971	0.079083	0.009724	12	0.120869	0.023768	12			4.69971	0.096806	0.006194	12	0.092622	0.007798	12
	4.76074	0.095384	0.005052	12	0.089556	0.007554	12			4.76074	0.07818	0.009769	12	0.118271	0.024031	12			4.76074	0.095948	0.00639	12	0.092174	0.007813	12
	4.82178	0.094503	0.005097	12	0.087908	0.006794	12			4.82178	0.077955	0.010022	12	0.114953	0.023948	12			4.82178	0.094971	0.006516	12	0.091966	0.007819	12
	4.88281	0.093527	0.005085	12	0.086371	0.006155	12			4.88281	0.077704	0.009992	12	0.113396	0.023529	12			4.88281	0.093851	0.006609	12	0.091777	0.007803	12
	4.94385	0.092524	0.00495	12	0.085011	0.005554	12			4.94385	0.077143	0.009547	12	0.113342	0.023076	12			4.94385	0.092825	0.006714	12	0.091435	0.00776	12
	5.00488	0.091559	0.004753	12	0.083748	0.004962	12			5.00488	0.07687	0.009127	12	0.112143	0.022638	12			5.00488	0.091875	0.006809	12	0.091003	0.007693	12
	5.06592	0.090598	0.004602	12	0.082501	0.004443	12			5.06592	0.077194	0.009005	12	0.108574	0.022124	12			5.06592	0.090693	0.006825	12	0.090598	0.007631	12
	5.12695	0.089583	0.00451	12	0.08127	0.004077	12			5.12695	0.077285	0.009011	12	0.104571	0.021649	12			5.12695	0.089208	0.006751	12	0.090213	0.007586	12
	5.18799	0.088482	0.004384	12	0.080089	0.003869	12			5.18799	0.076185	0.008797	12	0.102265	0.021366	12			5.18799	0.087755	0.00665	12	0.089797	0.007519	12
	5.24902	0.087286	0.00418	12	0.079013	0.003766	12			5.24902	0.07425	0.008526	12	0.100662	0.021038	12			5.24902	0.086551	0.006582	12	0.089376	0.007386	12
	5.31006	0.086062	0.003979	12	0.078144	0.003732	12			5.31006	0.072821	0.008686	12	0.096872	0.019928	12			5.31006	0.085315	0.006523	12	0.088986	0.007206	12
	5.37109	0.08498	0.003865	12	0.077541	0.003738	12			5.37109	0.072486	0.008934	12	0.090057	0.01741	12			5.37109	0.083686	0.006418	12	0.0886	0.007049	12
	5.43213	0.084129	0.003811	12	0.0771	0.003761	12			5.43213	0.072399	0.008815	12	0.082412	0.013911	12			5.43213	0.081813	0.006267	12	0.088223	0.006939	12
	5.49316	0.083336	0.003724	12	0.076607	0.003788	12			5.49316	0.071571	0.008535	12	0.076157	0.010841	12			5.49316	0.080159	0.006139	12	0.087948	0.006831	12
	5.5542	0.082319	0.003585	12	0.075963	0.003819	12			5.5542	0.070213	0.008551	12	0.071239	0.008987	12			5.5542	0.078811	0.006052	12	0.087791	0.006676	12
	5.61523	0.081062	0.003448	12	0.075269	0.003857	12			5.61523	0.069254	0.00887	12	0.066692	0.007889	12			5.61523	0.077341	0.005906	12	0.087577	0.006494	12
	5.67627	0.079825	0.003319	12	0.074639	0.003871	12			5.67627	0.068912	0.008964	12	0.062791	0.00722	12			5.67627	0.075432	0.005609	12	0.087119	0.006335	12
	5.73731	0.078742	0.003147	12	0.074048	0.003831	12			5.73731	0.068483	0.008526	12	0.060477	0.006977	12			5.73731	0.073309	0.005228	12	0.086483	0.00621	12
	5.79834	0.077627	0.002921	12	0.073443	0.003761	12			5.79834	0.067506	0.007913	12	0.05941	0.006851	12			5.79834	0.071368	0.004928	12	0.085888	0.006091	12
	5.85938	0.076326	0.002699	12	0.072873	0.00371	12			5.85938	0.066431	0.00775	12	0.058075	0.006413	12			5.85938	0.06962	0.004769	12	0.085403	0.005961	12
	5.92041	0.075052	0.00255	12	0.072372	0.003699	12			5.92041	0.065817	0.008105	12	0.055806	0.005708	12			5.92041	0.067764	0.004637	12	0.084892	0.005837	12
	5.98144	0.074103	0.00245	12	0.071818	0.003706	12			5.98144	0.065431	0.008462	12	0.05352	0.00516	12			5.98144	0.065698	0.004408	12	0.084273	0.005731	12
	6.04248	0.07337	0.002324	12	0.071086	0.00371	12			6.04248	0.064633	0.008429	12	0.052266	0.004927	12			6.04248	0.063669	0.004115	12	0.083623	0.005646	12
	6.10352	0.072467	0.002175	12	0.070335	0.003719	12			6.10352	0.063354	0.008211	12	0.05197	0.004863	12			6.10352	0.061916	0.003885	12	0.082972	0.005588	12
	6.16455	0.071325	0.002093	12	0.069908	0.003736	12			6.16455	0.062091	0.008203	12	0.051942	0.004923	12			6.16455	0.060383	0.003757	12	0.082204	0.005541	12
	6.22559	0.07032	0.002131	12	0.06988	0.003754	12			6.22559	0.061044	0.008356	12	0.051839	0.005086	12			6.22559	0.058882	0.003653	12	0.081261	0.005458	12
	6.28662	0.069701	0.002233	12	0.069885	0.003767	12			6.28662	0.059861	0.008265	12	0.051639	0.005222	12			6.28662	0.057348	0.003509	12	0.080308	0.005316	12
	6.34766	0.069203	0.002313	12	0.069546	0.003766	12			6.34766	0.058368	0.007843	12	0.051249	0.005175	12			6.34766	0.055823	0.00335	12	0.079518	0.005153	12
	6.40869	0.068464	0.002346	12	0.068955	0.00375	12			6.40869	0.056974	0.007595	12	0.050694	0.005016	12			6.40869	0.05432	0.003214	12	0.078822	0.005023	12
	6.46973	0.067573	0.002389	12	0.068541	0.003731	12			6.46973	0.055991	0.007879	12	0.050328	0.005073	12			6.46973	0.052838	0.003109	12	0.078041	0.004944	12
	6.53076	0.0669	0.002486	12	0.068512	0.003714	12			6.53076	0.054973	0.008213	12	0.050355	0.005457	12			6.53076	0.051434	0.00301	12	0.077207	0.0049	12
	6.5918	0.066482	0.002591	12	0.068623	0.003688	12			6.5918	0.053233	0.007799	12	0.050428	0.005877	12			6.5918	0.050158	0.002907	12	0.076509	0.004882	12
	6.65283	0.065952	0.002626	12	0.068535	0.003648	12			6.65283	0.050836	0.006651	12	0.050123	0.006029	12			6.65283	0.048936	0.002823	12	0.075946	0.004889	12
	6.71387	0.065098	0.002581	12	0.068219	0.00362	12			6.71387	0.048588	0.005692	12	0.049611	0.005964	12			6.71387	0.047667	0.002764	12	0.075281	0.004894	12
	6.7749	0.064178	0.002539	12	0.067904	0.003634	12			6.7749	0.047046	0.005566	12	0.049396	0.005989	12			6.7749	0.046384	0.002705	12	0.074393	0.004854	12
	6.83594	0.063523	0.002567	12	0.067753	0.003686	12			6.83594	0.04597	0.005925	12	0.049558	0.006258	12			6.83594	0.045214	0.002615	12	0.073468	0.004772	12
	6.89697	0.063088	0.002648	12	0.067727	0.003757	12			6.89697	0.044868	0.006041	12	0.049724	0.006554	12			6.89697	0.044159	0.002501	12	0.072691	0.004705	12
	6.95801	0.062596	0.002717	12	0.067733	0.003842	12			6.95801	0.043684	0.00566	12	0.049677	0.00656	12			6.95801	0.043075	0.002409	12	0.071956	0.004678	12
	7.01904	0.061976	0.002743	12	0.067735	0.003935	12			7.01904	0.042692	0.005248	12	0.049591	0.006387	12			7.01904	0.041906	0.002368	12	0.071103	0.004662	12
	7.08008	0.061402	0.002751	12	0.067712	0.004018	12			7.08008	0.041951	0.00524	12	0.049656	0.00643	12			7.08008	0.040806	0.002359	12	0.070288	0.004644	12
	7.14111	0.060965	0.002773	12	0.06763	0.004069	12			7.14111	0.041193	0.005432	12	0.049873	0.006955	12			7.14111	0.039932	0.002334	12	0.069846	0.00467	12
	7.20215	0.060547	0.002803	12	0.067517	0.004088	12			7.20215	0.040154	0.005414	12	0.050201	0.007727	12			7.20215	0.039231	0.002291	12	0.069792	0.004778	12
	7.26318	0.060054	0.002821	12	0.067498	0.004116	12			7.26318	0.038807	0.005095	12	0.050545	0.008196	12			7.26318	0.038534	0.002264	12	0.06975	0.004928	12
	7.32422	0.059576	0.002837	12	0.067645	0.004198	12			7.32422	0.03727	0.004768	12	0.050587	0.008222	12			7.32422	0.037804	0.00227	12	0.069453	0.005044	12
	7.38525	0.05921	0.002863	12	0.067848	0.00432	12			7.38525	0.035702	0.004574	12	0.050022	0.008044	12			7.38525	0.037141	0.002285	12	0.069072	0.005131	12
	7.44629	0.058881	0.002897	12	0.067937	0.004447	12			7.44629	0.034266	0.004338	12	0.049013	0.007893	12			7.44629	0.036576	0.002286	12	0.068916	0.005255	12
	7.50732	0.058451	0.002924	12	0.067911	0.004562	12			7.50732	0.033057	0.00393	12	0.048061	0.007788	12			7.50732	0.036008	0.002276	12	0.068979	0.00542	12
	7.56836	0.057939	0.002944	12	0.067934	0.004674	12			7.56836	0.032015	0.003428	12	0.047354	0.007618	12			7.56836	0.035381	0.002279	12	0.069021	0.005544	12
	7.62939	0.057485	0.002975	12	0.068103	0.004804	12			7.62939	0.030994	0.003047	12	0.046634	0.007405	12			7.62939	0.034782	0.002302	12	0.068954	0.005566	12
	7.69043	0.057143	0.003012	12	0.068302	0.004952	12			7.69043	0.029932	0.002796	12	0.045779	0.007278	12			7.69043	0.034296	0.002319	12	0.068911	0.005543	12
	7.75146	0.05681	0.00303	12	0.068384	0.005117	12			7.75146	0.028872	0.002538	12	0.045027	0.007229	12			7.75146	0.033862	0.002314	12	0.068946	0.005588	12
	7.8125	0.05638	0.003033	12	0.068386	0.005294	12			7.8125	0.027843	0.002196	12	0.044388	0.007061	12			7.8125	0.033376	0.002306	12	0.068917	0.005741	12
	7.87354	0.055874	0.003062	12	0.068451	0.005453	12			7.87354	0.026814	0.001833	12	0.043359	0.006664	12			7.87354	0.032859	0.002313	12	0.068742	0.005935	12
	7.93457	0.055375	0.00313	12	0.06859	0.005571	12			7.93457	0.02579	0.001586	12	0.041658	0.006204	12			7.93457	0.032423	0.002338	12	0.068542	0.006078	12
	7.99561	0.054925	0.0032	12	0.068665	0.00567	12			7.99561	0.024831	0.00144	12	0.039892	0.00592	12			7.99561	0.032081	0.002372	12	0.068406	0.006137	12
	8.05664	0.05451	0.003244	12	0.068629	0.005796	12			8.05664	0.023979	0.001305	12	0.038904	0.005852	12			8.05664	0.031722	0.00241	12	0.068187	0.006155	12
	8.11768	0.054126	0.003303	12	0.068604	0.005948	12			8.11768	0.023226	0.001134	12	0.038619	0.005843	12			8.11768	0.031266	0.00244	12	0.067711	0.006196	12
	8.17871	0.05378	0.003425	12	0.068652	0.006058	12			8.17871	0.022591	0.000996	12	0.038144	0.005755	12			8.17871	0.03077	0.002439	12	0.067075	0.006278	12
	8.23975	0.053436	0.003573	12	0.068604	0.006081	12			8.23975	0.022117	0.001006	12	0.037007	0.005557	12			8.23975	0.030335	0.002408	12	0.066539	0.006364	12
	8.30078	0.053014	0.003659	12	0.068297	0.006064	12			8.30078	0.021757	0.001099	12	0.035701	0.005293	12			8.30078	0.029981	0.002384	12	0.066146	0.006404	12
	8.36182	0.052471	0.003669	12	0.067874	0.006081	12			8.36182	0.021356	0.001092	12	0.034815	0.005022	12			8.36182	0.029657	0.002403	12	0.065654	0.0064	12
	8.42285	0.051855	0.003677	12	0.067639	0.006154	12			8.42285	0.0208	0.000944	12	0.034149	0.004703	12			8.42285	0.029325	0.002461	12	0.064875	0.006401	12
	8.48389	0.051256	0.003736	12	0.06763	0.006251	12			8.48389	0.02014	0.00079	12	0.033085	0.00423	12			8.48389	0.028979	0.002497	12	0.063901	0.006437	12
	8.54492	0.050701	0.003808	12	0.067521	0.006334	12			8.54492	0.019537	0.000757	12	0.031511	0.003552	12			8.54492	0.028617	0.002472	12	0.062917	0.006475	12
	8.60596	0.050129	0.003833	12	0.067044	0.006403	12			8.60596	0.019115	0.000755	12	0.029922	0.002795	12			8.60596	0.028254	0.002419	12	0.061936	0.006464	12
	8.66699	0.049462	0.00382	12	0.066319	0.006462	12			8.66699	0.01889	0.000735	12	0.028748	0.002231	12			8.66699	0.027929	0.002403	12	0.060851	0.006402	12
	8.72803	0.048701	0.003823	12	0.065637	0.006509	12			8.72803	0.018774	0.00074	12	0.027976	0.001977	12			8.72803	0.027659	0.002433	12	0.059641	0.006328	12
	8.78906	0.047933	0.003853	12	0.065064	0.006549	12			8.78906	0.018604	0.000774	12	0.02743	0.001928	12			8.78906	0.027393	0.002451	12	0.058389	0.006252	12
	8.8501	0.047247	0.003882	12	0.064441	0.006595	12			8.8501	0.018243	0.000838	12	0.027041	0.001896	12			8.8501	0.027054	0.002408	12	0.057128	0.006154	12
	8.91113	0.046649	0.003911	12	0.063698	0.006635	12			8.91113	0.017734	0.000858	12	0.026717	0.001828	12			8.91113	0.026635	0.002328	12	0.055807	0.006035	12
	8.97217	0.046054	0.003973	12	0.062942	0.006639	12			8.97217	0.017297	0.000823	12	0.026227	0.001777	12			8.97217	0.026197	0.002266	12	0.05439	0.005939	12
	9.0332	0.045365	0.004053	12	0.062208	0.006597	12			9.0332	0.017087	0.000824	12	0.025425	0.001687	12			9.0332	0.025786	0.002231	12	0.052885	0.005877	12
	9.09424	0.044562	0.004083	12	0.061348	0.006529	12			9.09424	0.016983	0.000866	12	0.024489	0.001554	12			9.09424	0.025386	0.002184	12	0.051266	0.005786	12
	9.15527	0.043714	0.004033	12	0.060256	0.006462	12			9.15527	0.016707	0.000852	12	0.023747	0.001498	12			9.15527	0.02498	0.002104	12	0.049497	0.0056	12
	9.21631	0.042906	0.003968	12	0.05906	0.006405	12			9.21631	0.01616	0.000751	12	0.023293	0.001579	12			9.21631	0.024588	0.002022	12	0.047668	0.00535	12
	9.27734	0.042156	0.003959	12	0.057948	0.006363	12			9.27734	0.015534	0.000636	12	0.022926	0.001662	12			9.27734	0.024232	0.001966	12	0.045987	0.005127	12
	9.33838	0.041406	0.003982	12	0.056912	0.006349	12			9.33838	0.015079	0.000619	12	0.022456	0.001673	12			9.33838	0.023889	0.001921	12	0.044553	0.004976	12
	9.39941	0.040605	0.003949	12	0.055811	0.006356	12			9.39941	0.014834	0.000706	12	0.021937	0.001702	12			9.39941	0.023511	0.001858	12	0.043229	0.004856	12
	9.46045	0.039773	0.003828	12	0.054638	0.006341	12			9.46045	0.014628	0.000755	12	0.021538	0.001813	12			9.46045	0.023097	0.001785	12	0.041815	0.004711	12
	9.52148	0.038958	0.003687	12	0.053551	0.006265	12			9.52148	0.014316	0.000737	12	0.021285	0.001974	12			9.52148	0.022683	0.001728	12	0.040297	0.004543	12
	9.58252	0.038166	0.003601	12	0.052637	0.006165	12			9.58252	0.01393	0.000738	12	0.021049	0.002061	12			9.58252	0.022284	0.001685	12	0.038834	0.004385	12
	9.64355	0.037376	0.003571	12	0.051762	0.00611	12			9.64355	0.013603	0.000781	12	0.020748	0.002072	12			9.64355	0.021874	0.00163	12	0.037521	0.004246	12
	9.70459	0.036599	0.003542	12	0.05073	0.006103	12			9.70459	0.013379	0.00081	12	0.020436	0.002136	12			9.70459	0.021439	0.001548	12	0.036296	0.004103	12
	9.76562	0.035885	0.003482	12	0.049488	0.006073	12			9.76562	0.01316	0.000783	12	0.020179	0.002254	12			9.76562	0.021015	0.001461	12	0.035072	0.003944	12
	9.82666	0.035234	0.003411	12	0.048155	0.005958	12			9.82666	0.012854	0.000725	12	0.019933	0.002333	12			9.82666	0.020643	0.001393	12	0.033868	0.003782	12
	9.8877	0.034575	0.003359	12	0.046895	0.005784	12			9.8877	0.012521	0.000685	12	0.01962	0.002342	12			9.8877	0.020308	0.00134	12	0.032743	0.003631	12
	9.94873	0.033859	0.003325	12	0.045816	0.005638	12			9.94873	0.0123	0.000666	12	0.019263	0.002335	12			9.94873	0.019948	0.001279	12	0.031687	0.003491	12
	10.0098	0.03314	0.003289	12	0.044921	0.005563	12			10.0098	0.01221	0.000645	12	0.018937	0.002372	12			10.0098	0.019533	0.001202	12	0.030631	0.003353	12
	10.0708	0.032496	0.003236	12	0.044099	0.005514	12			10.0708	0.012103	0.000616	12	0.018636	0.002403	12			10.0708	0.019097	0.001128	12	0.029548	0.003218	12
	10.1318	0.031917	0.003172	12	0.0432	0.005432	12			10.1318	0.011877	0.000589	12	0.018285	0.002383	12			10.1318	0.018693	0.00107	12	0.028476	0.003081	12
	10.1929	0.031321	0.003116	12	0.04218	0.005315	12			10.1929	0.011619	0.000588	12	0.017874	0.002376	12			10.1929	0.018334	0.001029	12	0.027461	0.002933	12
	10.2539	0.030675	0.003069	12	0.041133	0.005212	12			10.2539	0.011478	0.000613	12	0.017497	0.002462	12			10.2539	0.017986	0.000996	12	0.026513	0.002778	12
	10.3149	0.030023	0.003015	12	0.040147	0.00514	12			10.3149	0.011442	0.000635	12	0.0172	0.002628	12			10.3149	0.017621	0.000964	12	0.025636	0.002635	12
	10.376	0.029386	0.002934	12	0.039171	0.005067	12			10.376	0.011372	0.00063	12	0.016904	0.002795	12			10.376	0.017242	0.000932	12	0.024837	0.002522	12
	10.437	0.028718	0.002832	12	0.038103	0.004965	12			10.437	0.011211	0.000609	12	0.016513	0.002891	12			10.437	0.016863	0.000902	12	0.024116	0.002425	12
	10.498	0.027999	0.002737	12	0.036972	0.004855	12			10.498	0.011047	0.000594	12	0.016047	0.002878	12			10.498	0.016487	0.000868	12	0.023445	0.002319	12
	10.5591	0.0273	0.002672	12	0.035936	0.004776	12			10.5591	0.010945	0.000583	12	0.0156	0.002765	12			10.5591	0.016115	0.000831	12	0.022795	0.002197	12
	10.6201	0.026694	0.002633	12	0.035083	0.004714	12			10.6201	0.010844	0.000577	12	0.015237	0.002601	12			10.6201	0.015758	0.000797	12	0.022153	0.002078	12
	10.6812	0.026149	0.002599	12	0.034317	0.004613	12			10.6812	0.010684	0.000562	12	0.014969	0.002474	12			10.6812	0.015432	0.000779	12	0.021521	0.001981	12
	10.7422	0.025578	0.002556	12	0.033478	0.00445	12			10.7422	0.010506	0.000546	12	0.014774	0.002463	12			10.7422	0.015132	0.000773	12	0.020903	0.001903	12
	10.8032	0.024966	0.002507	12	0.032516	0.004263	12			10.8032	0.010364	0.000548	12	0.014583	0.002532	12			10.8032	0.014837	0.000764	12	0.020299	0.00183	12
	10.8643	0.024381	0.002452	12	0.031493	0.004099	12			10.8643	0.010222	0.000578	12	0.014291	0.002538	12			10.8643	0.014543	0.00075	12	0.01972	0.001753	12
	10.9253	0.023863	0.002388	12	0.030483	0.003951	12			10.9253	0.010033	0.000601	12	0.013869	0.002402	12			10.9253	0.014264	0.000738	12	0.01919	0.001677	12
	10.9863	0.023377	0.002312	12	0.029514	0.003781	12			10.9863	0.009867	0.000583	12	0.013433	0.002191	12			10.9863	0.014008	0.000736	12	0.018732	0.001615	12
	11.0474	0.022881	0.002233	12	0.028606	0.003592	12			11.0474	0.009827	0.000548	12	0.01312	0.002022	12			11.0474	0.013756	0.000741	12	0.018335	0.00157	12
	11.1084	0.022389	0.002163	12	0.02778	0.003437	12			11.1084	0.00988	0.000533	12	0.012926	0.001972	12			11.1084	0.013485	0.000746	12	0.017959	0.001532	12
	11.1694	0.021922	0.002102	12	0.027028	0.003346	12			11.1694	0.009881	0.000547	12	0.012727	0.002013	12			11.1694	0.013206	0.000752	12	0.017567	0.00149	12
	11.2305	0.021465	0.002043	12	0.026311	0.00329	12			11.2305	0.009759	0.000573	12	0.012464	0.002094	12			11.2305	0.012953	0.000764	12	0.017174	0.001443	12
	11.2915	0.020988	0.001987	12	0.025604	0.003215	12			11.2915	0.009595	0.000617	12	0.012216	0.002176	12			11.2915	0.012739	0.000782	12	0.016822	0.001407	12
	11.3525	0.020509	0.001935	12	0.024912	0.003105	12			11.3525	0.009485	0.000658	12	0.012086	0.002224	12			11.3525	0.01254	0.000799	12	0.016519	0.001393	12
	11.4136	0.020057	0.001881	12	0.024229	0.002982	12			11.4136	0.009418	0.000675	12	0.012062	0.00226	12			11.4136	0.012327	0.000805	12	0.016227	0.001391	12
	11.4746	0.019621	0.00181	12	0.023527	0.002861	12			11.4746	0.009326	0.000681	12	0.012026	0.002307	12			11.4746	0.012107	0.000803	12	0.015915	0.001381	12
	11.5356	0.019159	0.001714	12	0.02279	0.002732	12			11.5356	0.00918	0.000675	12	0.011862	0.002321	12			11.5356	0.011908	0.000801	12	0.015604	0.001358	12
	11.5967	0.018672	0.00161	12	0.022054	0.002589	12			11.5967	0.009005	0.000666	12	0.011573	0.002233	12			11.5967	0.011742	0.000801	12	0.015332	0.001334	12
	11.6577	0.018218	0.001525	12	0.021373	0.002442	12			11.6577	0.008817	0.000664	12	0.011302	0.002081	12			11.6577	0.011592	0.000797	12	0.015097	0.001319	12
	11.7188	0.017846	0.001477	12	0.020759	0.002298	12			11.7188	0.008617	0.00066	12	0.011218	0.001999	12			11.7188	0.011437	0.000788	12	0.014868	0.001308	12
	11.7798	0.01754	0.001455	12	0.020175	0.002158	12			11.7798	0.008408	0.000651	12	0.011329	0.002057	12			11.7798	0.01127	0.00078	12	0.014634	0.001293	12
	11.8408	0.017243	0.001427	12	0.019593	0.002028	12			11.8408	0.008201	0.000625	12	0.011447	0.002186	12			11.8408	0.0111	0.000779	12	0.014408	0.001273	12
	11.9019	0.016919	0.001366	12	0.019022	0.001923	12			11.9019	0.008017	0.00058	12	0.011404	0.002248	12			11.9019	0.010928	0.000779	12	0.014189	0.001253	12
	11.9629	0.016579	0.001278	12	0.018488	0.001842	12			11.9629	0.007887	0.000551	12	0.011255	0.002196	12			11.9629	0.010749	0.000772	12	0.013954	0.001241	12
	12.0239	0.016254	0.001195	12	0.017993	0.00176	12			12.0239	0.007811	0.000547	12	0.011164	0.002089	12			12.0239	0.010564	0.000758	12	0.013706	0.001234	12
	12.085	0.01596	0.001148	12	0.017522	0.001659	12			12.085	0.007735	0.000535	12	0.011132	0.001984	12			12.085	0.010378	0.000744	12	0.013481	0.001225	12
	12.146	0.015688	0.00113	12	0.01707	0.001548	12			12.146	0.007596	0.000504	12	0.010998	0.001891	12			12.146	0.010196	0.000733	12	0.013296	0.00121	12
	12.207	0.015426	0.001111	12	0.016659	0.00145	12			12.207	0.007422	0.000485	12	0.010714	0.001811	12			12.207	0.010015	0.000719	12	0.013122	0.001188	12
	12.2681	0.015178	0.001078	12	0.016305	0.001372	12			12.2681	0.00731	0.000506	12	0.010443	0.00177	12			12.2681	0.009834	0.000699	12	0.012936	0.001166	12
	12.3291	0.014952	0.001043	12	0.015985	0.001305	12			12.3291	0.00728	0.000554	12	0.010307	0.001771	12			12.3291	0.009663	0.000678	12	0.012756	0.001146	12
	12.3901	0.014745	0.001017	12	0.015658	0.001241	12			12.3901	0.007219	0.00057	12	0.010206	0.001755	12			12.3901	0.009508	0.000662	12	0.012604	0.001126	12
	12.4512	0.014531	0.000988	12	0.015298	0.001177	12			12.4512	0.00704	0.000527	12	0.010008	0.001673	12			12.4512	0.009366	0.000649	12	0.012456	0.001104	12
	12.5122	0.014295	0.000946	12	0.014922	0.001108	12			12.5122	0.006811	0.000468	12	0.009802	0.001574	12			12.5122	0.009226	0.000631	12	0.012286	0.001086	12
	12.5732	0.014055	0.000904	12	0.014559	0.001028	12			12.5732	0.006658	0.000448	12	0.009783	0.001538	12			12.5732	0.009081	0.00061	12	0.012112	0.001077	12
	12.6343	0.013838	0.000881	12	0.014221	0.000948	12			12.6343	0.006566	0.000451	12	0.009934	0.001572	12			12.6343	0.008935	0.000591	12	0.011966	0.001072	12
	12.6953	0.01364	0.000873	12	0.0139	0.000878	12			12.6953	0.006416	0.000421	12	0.010025	0.0016	12			12.6953	0.008789	0.000577	12	0.01183	0.001058	12
	12.7563	0.013443	0.000856	12	0.01359	0.00082	12			12.7563	0.006195	0.00036	12	0.009932	0.001568	12			12.7563	0.008637	0.000566	12	0.01166	0.001031	12
	12.8174	0.01325	0.000824	12	0.013297	0.000767	12			12.8174	0.006041	0.000328	12	0.009783	0.001514	12			12.8174	0.008478	0.000553	12	0.011471	0.001008	12
	12.8784	0.013082	0.000795	12	0.013031	0.000718	12			12.8784	0.006029	0.000355	12	0.00974	0.001496	12			12.8784	0.008326	0.000541	12	0.011327	0.000999	12
	12.9395	0.012938	0.000786	12	0.01279	0.000679	12			12.9395	0.006041	0.000402	12	0.00977	0.001521	12			12.9395	0.008193	0.000536	12	0.011242	0.001001	12
	13.0005	0.012791	0.000783	12	0.012579	0.000655	12			13.0005	0.005934	0.000411	12	0.009713	0.00153	12			13.0005	0.008074	0.000535	12	0.011152	0.000998	12
	13.0615	0.012625	0.000767	12	0.012401	0.000642	12			13.0615	0.005749	0.000382	12	0.009494	0.00147	12			13.0615	0.007951	0.000534	12	0.011008	0.000989	12
	13.1226	0.012455	0.000744	12	0.012245	0.000633	12			13.1226	0.00564	0.000362	12	0.009192	0.001351	12			13.1226	0.007819	0.000529	12	0.010854	0.000984	12
	13.1836	0.012305	0.000735	12	0.012081	0.000621	12			13.1836	0.00564	0.000366	12	0.008936	0.00123	12			13.1836	0.007694	0.000524	12	0.01075	0.000984	12
	13.2446	0.012172	0.000748	12	0.011892	0.0006	12			13.2446	0.005609	0.000361	12	0.008795	0.001156	12			13.2446	0.007593	0.000524	12	0.010683	0.000979	12
	13.3057	0.012042	0.000762	12	0.011693	0.000568	12			13.3057	0.005453	0.000341	12	0.008741	0.00114	12			13.3057	0.007516	0.000525	12	0.010591	0.000962	12
	13.3667	0.011916	0.000759	12	0.011516	0.000539	12			13.3667	0.005254	0.000339	12	0.008687	0.001147	12			13.3667	0.007448	0.000523	12	0.010461	0.000946	12
	13.4277	0.011799	0.000742	12	0.01137	0.000522	12			13.4277	0.005146	0.000371	12	0.008581	0.001135	12			13.4277	0.00738	0.000519	12	0.010341	0.00094	12
	13.4888	0.011677	0.000726	12	0.01123	0.000515	12			13.4888	0.005128	0.000407	12	0.008473	0.001104	12			13.4888	0.007311	0.000515	12	0.010255	0.000941	12
	13.5498	0.011534	0.000714	12	0.01108	0.000507	12			13.5498	0.005091	0.000406	12	0.008444	0.001081	12			13.5498	0.007235	0.000514	12	0.010173	0.000938	12
	13.6108	0.011383	0.000703	12	0.010931	0.000494	12			13.6108	0.004984	0.000367	12	0.00846	0.001066	12			13.6108	0.007147	0.000517	12	0.010068	0.000932	12
	13.6719	0.011257	0.000695	12	0.010803	0.000485	12			13.6719	0.004864	0.000333	12	0.008391	0.001032	12			13.6719	0.007048	0.000519	12	0.00996	0.000929	12
	13.7329	0.011161	0.000698	12	0.010688	0.000484	12			13.7329	0.004787	0.000328	12	0.008205	0.000975	12			13.7329	0.006948	0.000516	12	0.009868	0.000931	12
	13.794	0.011065	0.000711	12	0.010567	0.000483	12			13.794	0.004723	0.000331	12	0.008035	0.000934	12			13.794	0.006859	0.000507	12	0.009776	0.000926	12
	13.855	0.010945	0.000723	12	0.01044	0.000476	12			13.855	0.00462	0.000323	12	0.007994	0.000941	12			13.855	0.006781	0.000496	12	0.009668	0.000915	12
	13.916	0.010815	0.000725	12	0.010333	0.000468	12			13.916	0.004492	0.000308	12	0.008001	0.000963	12			13.916	0.006706	0.000486	12	0.00957	0.000907	12
	13.9771	0.010701	0.000721	12	0.01026	0.000466	12			13.9771	0.004402	0.000309	12	0.007909	0.000945	12			13.9771	0.00663	0.00048	12	0.009513	0.000911	12
	14.0381	0.010609	0.000718	12	0.010205	0.000473	12			14.0381	0.004368	0.000336	12	0.007724	0.000897	12			14.0381	0.006559	0.000476	12	0.009477	0.000918	12
	14.0991	0.010522	0.000718	12	0.010143	0.00048	12			14.0991	0.004351	0.000371	12	0.007587	0.000872	12			14.0991	0.006499	0.000469	12	0.009411	0.000915	12
	14.1602	0.010427	0.000719	12	0.010068	0.00048	12			14.1602	0.004316	0.00038	12	0.007542	0.000892	12			14.1602	0.00645	0.000465	12	0.009306	0.000901	12
	14.2212	0.010328	0.000715	12	0.009991	0.000475	12			14.2212	0.004283	0.000361	12	0.007485	0.000914	12			14.2212	0.006401	0.000465	12	0.0092	0.000889	12
	14.2822	0.01023	0.000709	12	0.009914	0.000471	12			14.2822	0.004284	0.000339	12	0.007358	0.00089	12			14.2822	0.006339	0.000462	12	0.009121	0.000886	12
	14.3433	0.010136	0.000704	12	0.009831	0.000471	12			14.3433	0.004299	0.000335	12	0.00726	0.000845	12			14.3433	0.006266	0.000453	12	0.009055	0.000885	12
	14.4043	0.010051	0.000705	12	0.009744	0.000469	12			14.4043	0.00427	0.00034	12	0.007286	0.000836	12			14.4043	0.006195	0.000439	12	0.008981	0.000877	12
	14.4653	0.009978	0.000713	12	0.009667	0.000461	12			14.4653	0.004179	0.000341	12	0.007369	0.000863	12			14.4653	0.00613	0.000428	12	0.008898	0.000859	12
	14.5264	0.009907	0.000722	12	0.009608	0.000455	12			14.5264	0.004079	0.000335	12	0.007359	0.000865	12			14.5264	0.006062	0.00042	12	0.008823	0.000843	12
	14.5874	0.009826	0.000726	12	0.009555	0.000455	12			14.5874	0.004036	0.000334	12	0.007219	0.000812	12			14.5874	0.005982	0.000412	12	0.008756	0.000836	12
	14.6484	0.009733	0.00072	12	0.009499	0.00046	12			14.6484	0.004046	0.000342	12	0.007058	0.000753	12			14.6484	0.005908	0.000402	12	0.008689	0.000835	12
	14.7095	0.009647	0.00071	12	0.009441	0.000462	12			14.7095	0.004049	0.000341	12	0.006974	0.000744	12			14.7095	0.005861	0.000395	12	0.008622	0.000831	12
	14.7705	0.009581	0.000707	12	0.009388	0.000459	12			14.7705	0.004007	0.000326	12	0.006953	0.000776	12			14.7705	0.005835	0.000392	12	0.008559	0.00082	12
	14.8315	0.009527	0.000713	12	0.009337	0.000458	12			14.8315	0.003954	0.000309	12	0.006917	0.00079	12			14.8315	0.0058	0.000391	12	0.008498	0.000808	12
	14.8926	0.009461	0.00072	12	0.009286	0.000463	12			14.8926	0.003934	0.000308	12	0.006826	0.000753	12			14.8926	0.005742	0.000383	12	0.008431	0.0008	12
	14.9536	0.009377	0.000719	12	0.009241	0.000465	12			14.9536	0.003934	0.000322	12	0.006711	0.000712	12			14.9536	0.005685	0.000371	12	0.008363	0.000794	12
	15.0146	0.009295	0.000712	12	0.009211	0.00046	12			15.0146	0.0039	0.000324	12	0.006634	0.000705	12			15.0146	0.005653	0.000363	12	0.008308	0.000785	12
	15.0757	0.009243	0.000708	12	0.009191	0.000451	12			15.0757	0.00382	0.000304	12	0.006619	0.000714	12			15.0757	0.005638	0.000362	12	0.008269	0.000776	12
	15.1367	0.009218	0.00071	12	0.009162	0.000445	12			15.1367	0.003751	0.000282	12	0.00661	0.000703	12			15.1367	0.005613	0.000364	12	0.008233	0.000772	12
	15.1977	0.009185	0.000713	12	0.009116	0.000443	12			15.1977	0.003741	0.000276	12	0.006522	0.000672	12			15.1977	0.005571	0.000365	12	0.008186	0.00077	12
	15.2588	0.009125	0.000713	12	0.009062	0.00044	12			15.2588	0.003755	0.000278	12	0.006336	0.000649	12			15.2588	0.005529	0.000362	12	0.00812	0.000762	12
	15.3198	0.009061	0.000712	12	0.009007	0.000435	12			15.3198	0.00373	0.000262	12	0.006135	0.000628	12			15.3198	0.005494	0.000357	12	0.008048	0.000747	12
	15.3809	0.009024	0.000715	12	0.008949	0.000431	12			15.3809	0.003665	0.000238	12	0.006007	0.00061	12			15.3809	0.00545	0.000353	12	0.007986	0.000738	12
	15.4419	0.008999	0.000719	12	0.008887	0.000428	12			15.4419	0.003625	0.000227	12	0.005942	0.0006	12			15.4419	0.005393	0.000354	12	0.007951	0.000743	12
	15.5029	0.008948	0.00072	12	0.008832	0.000425	12			15.5029	0.003642	0.000225	12	0.005855	0.000584	12			15.5029	0.00534	0.000359	12	0.007939	0.000756	12
	15.564	0.008866	0.000716	12	0.00879	0.000421	12			15.564	0.003653	0.000218	12	0.005697	0.000556	12			15.564	0.005311	0.000362	12	0.007927	0.000762	12
	15.625	0.008791	0.000711	12	0.00875	0.000418	12			15.625	0.003593	0.000201	12	0.005515	0.000529	12			15.625	0.005298	0.000359	12	0.007894	0.000757	12
	15.686	0.008744	0.00071	12	0.008694	0.000416	12			15.686	0.003491	0.000185	12	0.005381	0.000523	12			15.686	0.005277	0.000353	12	0.007845	0.000749	12
	15.7471	0.00869	0.000709	12	0.008629	0.000411	12			15.7471	0.003451	0.000186	12	0.005313	0.00053	12			15.7471	0.005238	0.000348	12	0.007798	0.000743	12
	15.8081	0.008598	0.000702	12	0.008576	0.000404	12			15.8081	0.003514	0.000207	12	0.005274	0.000527	12			15.8081	0.005195	0.000346	12	0.007766	0.00074	12
	15.8691	0.008497	0.000689	12	0.008537	0.0004	12			15.8691	0.003604	0.000228	12	0.005217	0.0005	12			15.8691	0.005157	0.000345	12	0.007741	0.000737	12
	15.9302	0.008439	0.00068	12	0.008492	0.000399	12			15.9302	0.003627	0.000231	12	0.005134	0.00047	12			15.9302	0.005122	0.000345	12	0.007706	0.000736	12
	15.9912	0.008415	0.000683	12	0.008429	0.0004	12			15.9912	0.003574	0.000226	12	0.005054	0.000474	12			15.9912	0.00508	0.000345	12	0.00766	0.000735	12
	16.0523	0.008364	0.000689	12	0.008363	0.000399	12			16.0523	0.003521	0.00023	12	0.005004	0.000491	12			16.0523	0.005035	0.000343	12	0.007613	0.000731	12
	16.1133	0.00826	0.000689	12	0.008318	0.000399	12			16.1133	0.003521	0.000257	12	0.004979	0.000483	12			16.1133	0.004994	0.000339	12	0.007575	0.000725	12
	16.1743	0.008153	0.000679	12	0.008287	0.000403	12			16.1743	0.003555	0.000284	12	0.004938	0.000446	12			16.1743	0.004959	0.000336	12	0.007546	0.00072	12
	16.2354	0.008093	0.000671	12	0.008245	0.000408	12			16.2354	0.00357	0.000292	12	0.004867	0.000427	12			16.2354	0.004925	0.000335	12	0.007514	0.000722	12
	16.2964	0.008058	0.000675	12	0.008184	0.00041	12			16.2964	0.003548	0.000289	12	0.004804	0.000452	12			16.2964	0.004889	0.000335	12	0.007476	0.000727	12
	16.3574	0.007997	0.000684	12	0.008121	0.000411	12			16.3574	0.003522	0.000298	12	0.004788	0.000501	12			16.3574	0.004854	0.000334	12	0.007433	0.000725	12
	16.4185	0.007915	0.000682	12	0.008076	0.000413	12			16.4185	0.003526	0.000319	12	0.004786	0.000528	12			16.4185	0.004821	0.000332	12	0.007388	0.000716	12
	16.4795	0.007857	0.000672	12	0.008042	0.000417	12			16.4795	0.003559	0.000335	12	0.004736	0.000514	12			16.4795	0.004793	0.000332	12	0.007343	0.000708	12
	16.5405	0.007837	0.000668	12	0.008007	0.000425	12			16.5405	0.003586	0.000341	12	0.004643	0.000489	12			16.5405	0.004766	0.000336	12	0.007298	0.000706	12
	16.6016	0.007817	0.000675	12	0.007971	0.000435	12			16.6016	0.003585	0.00035	12	0.004589	0.000477	12			16.6016	0.00474	0.00034	12	0.007258	0.000707	12
	16.6626	0.007767	0.000683	12	0.007939	0.000444	12			16.6626	0.003565	0.000371	12	0.004605	0.000473	12			16.6626	0.004712	0.00034	12	0.007223	0.000704	12
	16.7236	0.007704	0.000682	12	0.007908	0.000449	12			16.7236	0.00355	0.000392	12	0.004618	0.000461	12			16.7236	0.004681	0.000336	12	0.007183	0.000696	12
	16.7847	0.007658	0.000676	12	0.007866	0.000447	12			16.7847	0.003542	0.000398	12	0.004552	0.000447	12			16.7847	0.004645	0.000331	12	0.007125	0.000689	12
	16.8457	0.007624	0.000677	12	0.00782	0.000442	12			16.8457	0.003527	0.000393	12	0.00445	0.000449	12			16.8457	0.004606	0.000325	12	0.007058	0.000687	12
	16.9067	0.007583	0.000684	12	0.00779	0.000445	12			16.9067	0.003504	0.000389	12	0.004425	0.000471	12			16.9067	0.004571	0.000321	12	0.007013	0.00069	12
	16.9678	0.007538	0.000687	12	0.007786	0.000455	12			16.9678	0.003494	0.000393	12	0.0045	0.000497	12			16.9678	0.004544	0.00032	12	0.007008	0.000695	12
	17.0288	0.007505	0.000681	12	0.007788	0.000464	12			17.0288	0.003496	0.000398	12	0.004577	0.000511	12			17.0288	0.004522	0.00032	12	0.007016	0.000699	12
	17.0898	0.007481	0.000673	12	0.007766	0.000465	12			17.0898	0.00347	0.000387	12	0.004574	0.000517	12			17.0898	0.004499	0.00032	12	0.007001	0.000699	12
	17.1509	0.007449	0.000673	12	0.007718	0.000464	12			17.1509	0.003389	0.000362	12	0.004523	0.000528	12			17.1509	0.004474	0.000318	12	0.006954	0.000697	12
	17.2119	0.007407	0.000678	12	0.007665	0.000465	12			17.2119	0.003298	0.000337	12	0.004507	0.000545	12			17.2119	0.004459	0.000315	12	0.006905	0.000697	12
	17.273	0.007372	0.00068	12	0.007623	0.000467	12			17.273	0.003275	0.000324	12	0.004532	0.000558	12			17.273	0.004458	0.000314	12	0.006873	0.000697	12
	17.334	0.007348	0.00068	12	0.007588	0.000462	12			17.334	0.003324	0.000323	12	0.00454	0.000556	12			17.334	0.004455	0.000313	12	0.006842	0.000694	12
	17.395	0.007323	0.000682	12	0.007547	0.000452	12			17.395	0.003362	0.00032	12	0.0045	0.000542	12			17.395	0.004431	0.00031	12	0.006794	0.000686	12
	17.4561	0.007291	0.000687	12	0.007501	0.000446	12			17.4561	0.003319	0.000304	12	0.004448	0.000536	12			17.4561	0.004391	0.000304	12	0.006743	0.000678	12
	17.5171	0.007264	0.000686	12	0.00746	0.000446	12			17.5171	0.003227	0.00028	12	0.004417	0.000545	12			17.5171	0.004361	0.0003	12	0.006715	0.000677	12
	17.5781	0.007245	0.000679	12	0.007428	0.000445	12			17.5781	0.00317	0.000259	12	0.00439	0.000553	12			17.5781	0.004351	0.000299	12	0.006703	0.000678	12
	17.6392	0.00722	0.000669	12	0.007394	0.00044	12			17.6392	0.00317	0.00025	12	0.004335	0.000544	12			17.6392	0.004346	0.000297	12	0.006674	0.000674	12
	17.7002	0.007181	0.000663	12	0.007355	0.000434	12			17.7002	0.003167	0.000247	12	0.004269	0.000526	12			17.7002	0.004327	0.000292	12	0.006619	0.000666	12
	17.7612	0.007138	0.00066	12	0.007323	0.000434	12			17.7612	0.003117	0.000244	12	0.004239	0.000518	12			17.7612	0.004298	0.000287	12	0.006571	0.00066	12
	17.8223	0.007103	0.000656	12	0.007313	0.000438	12			17.8223	0.003047	0.000238	12	0.004256	0.000525	12			17.8223	0.004273	0.000285	12	0.006565	0.000663	12
	17.8833	0.007069	0.00065	12	0.007317	0.000436	12			17.8833	0.00301	0.000234	12	0.004276	0.00053	12			17.8833	0.004254	0.000282	12	0.006579	0.00067	12
	17.9443	0.00702	0.000642	12	0.007305	0.000429	12			17.9443	0.003006	0.000231	12	0.00426	0.000519	12			17.9443	0.004228	0.000275	12	0.006568	0.000674	12
	18.0054	0.006964	0.000633	12	0.007262	0.000428	12			18.0054	0.002997	0.00022	12	0.004225	0.00051	12			18.0054	0.004192	0.000265	12	0.006521	0.000672	12
	18.0664	0.006923	0.000625	12	0.007205	0.000436	12			18.0664	0.002973	0.000198	12	0.004218	0.00052	12			18.0664	0.004162	0.00026	12	0.006476	0.000669	12
	18.1274	0.006905	0.000621	12	0.00717	0.000445	12			18.1274	0.002964	0.000185	12	0.004241	0.000545	12			18.1274	0.004148	0.000262	12	0.006459	0.000669	12
	18.1885	0.006884	0.00062	12	0.00716	0.000444	12			18.1885	0.002982	0.000197	12	0.004236	0.000556	12			18.1885	0.004143	0.000263	12	0.006456	0.00067	12
	18.2495	0.006836	0.000618	12	0.007145	0.000435	12			18.2495	0.002994	0.000212	12	0.004166	0.000536	12			18.2495	0.004135	0.000258	12	0.006434	0.000668	12
	18.3105	0.006766	0.000612	12	0.007096	0.00043	12			18.3105	0.002968	0.000212	12	0.004075	0.0005	12			18.3105	0.004123	0.000252	12	0.006388	0.000663	12
	18.3716	0.006704	0.000603	12	0.007027	0.000433	12			18.3716	0.002927	0.000199	12	0.00404	0.000474	12			18.3716	0.004111	0.000251	12	0.00634	0.000659	12
	18.4326	0.006666	0.000596	12	0.006978	0.000435	12			18.4326	0.002914	0.000191	12	0.004066	0.000459	12			18.4326	0.004097	0.000254	12	0.006307	0.000656	12
	18.4936	0.00664	0.000591	12	0.006962	0.000432	12			18.4936	0.002929	0.000201	12	0.004068	0.000439	12			18.4936	0.004074	0.000254	12	0.006282	0.000651	12
	18.5547	0.006607	0.000587	12	0.006955	0.000429	12			18.5547	0.002924	0.000213	12	0.003982	0.000413	12			18.5547	0.004046	0.000249	12	0.006255	0.000647	12
	18.6157	0.006564	0.00058	12	0.006929	0.000432	12			18.6157	0.002871	0.000209	12	0.003857	0.000395	12			18.6157	0.004023	0.000244	12	0.006235	0.000649	12
	18.6768	0.006525	0.000574	12	0.006883	0.000441	12			18.6768	0.002806	0.000199	12	0.003797	0.000402	12			18.6768	0.004009	0.000245	12	0.006225	0.00066	12
	18.7378	0.006495	0.000571	12	0.006841	0.000445	12			18.7378	0.002781	0.000206	12	0.003825	0.00043	12			18.7378	0.003998	0.000247	12	0.006217	0.00067	12
	18.7988	0.00646	0.000569	12	0.006815	0.000443	12			18.7988	0.002796	0.000233	12	0.003861	0.000447	12			18.7988	0.003983	0.000246	12	0.006196	0.000671	12
	18.8599	0.006405	0.000567	12	0.006799	0.000438	12			18.8599	0.002798	0.000256	12	0.003831	0.000434	12			18.8599	0.003963	0.000242	12	0.006167	0.000663	12
	18.9209	0.006334	0.000563	12	0.006782	0.000437	12			18.9209	0.002755	0.000256	12	0.003756	0.000411	12			18.9209	0.003939	0.000239	12	0.006144	0.000656	12
	18.9819	0.006273	0.000559	12	0.006763	0.000437	12			18.9819	0.002698	0.000241	12	0.003712	0.000401	12			18.9819	0.003911	0.000238	12	0.006131	0.000653	12
	19.043	0.006236	0.000558	12	0.006738	0.000435	12			19.043	0.002675	0.000238	12	0.003712	0.000402	12			19.043	0.003884	0.000237	12	0.006119	0.000654	12
	19.104	0.006207	0.000557	12	0.006698	0.00043	12			19.104	0.002683	0.000253	12	0.003706	0.000395	12			19.104	0.003865	0.000234	12	0.006099	0.000654	12
	19.165	0.006165	0.000557	12	0.006644	0.000429	12			19.165	0.002671	0.000262	12	0.003651	0.000372	12			19.165	0.003855	0.000232	12	0.006078	0.000655	12
	19.2261	0.006111	0.000556	12	0.006594	0.000433	12			19.2261	0.002614	0.000249	12	0.003569	0.000355	12			19.2261	0.003846	0.000232	12	0.006062	0.000658	12
	19.2871	0.006067	0.000554	12	0.006558	0.000437	12			19.2871	0.002545	0.000227	12	0.003505	0.000361	12			19.2871	0.003829	0.000234	12	0.00605	0.000661	12
	19.3481	0.006043	0.000553	12	0.006526	0.000435	12			19.3481	0.002506	0.000216	12	0.00348	0.000379	12			19.3481	0.003806	0.000234	12	0.006038	0.000662	12
	19.4092	0.006019	0.000557	12	0.006487	0.000428	12			19.4092	0.002491	0.000219	12	0.00349	0.000384	12			19.4092	0.003783	0.000233	12	0.006026	0.000663	12
	19.4702	0.005979	0.000563	12	0.006447	0.000425	12			19.4702	0.002455	0.000219	12	0.003519	0.000377	12			19.4702	0.003758	0.00023	12	0.006015	0.000664	12
	19.5312	0.005936	0.000567	12	0.006422	0.00043	12			19.5312	0.002387	0.000211	12	0.003543	0.000376	12			19.5312	0.003725	0.000227	12	0.005998	0.000663	12
	19.5923	0.005915	0.000568	12	0.006407	0.000437	12			19.5923	0.002328	0.000202	12	0.003531	0.000385	12			19.5923	0.003691	0.000225	12	0.00597	0.00066	12
	19.6533	0.00591	0.000567	12	0.006381	0.000438	12			19.6533	0.002317	0.000206	12	0.003476	0.000385	12			19.6533	0.003665	0.000223	12	0.005945	0.000658	12
	19.7144	0.00589	0.00057	12	0.006339	0.000431	12			19.7144	0.002338	0.000217	12	0.003411	0.000367	12			19.7144	0.003651	0.00022	12	0.005933	0.00066	12
	19.7754	0.00584	0.000575	12	0.0063	0.000422	12			19.7754	0.00234	0.000219	12	0.003372	0.000359	12			19.7754	0.00364	0.000215	12	0.005929	0.000661	12
	19.8364	0.00578	0.000579	12	0.006276	0.00042	12			19.8364	0.00231	0.000211	12	0.003349	0.000381	12			19.8364	0.003624	0.00021	12	0.005912	0.000657	12
	19.8975	0.005739	0.00058	12	0.006256	0.000421	12			19.8975	0.00229	0.000206	12	0.003313	0.00041	12			19.8975	0.003605	0.00021	12	0.005876	0.000648	12
	19.9585	0.005716	0.000583	12	0.006229	0.000421	12			19.9585	0.002311	0.000217	12	0.003257	0.000406	12			19.9585	0.003592	0.000214	12	0.005838	0.000638	12
	20.0195	0.005693	0.00059	12	0.006201	0.000419	12			20.0195	0.002347	0.000233	12	0.003207	0.00037	12			20.0195	0.003584	0.000217	12	0.005811	0.000631	12
	20.0806	0.005663	0.000595	12	0.006183	0.00042	12			20.0806	0.002344	0.000238	12	0.00318	0.000339	12			20.0806	0.003571	0.000214	12	0.005791	0.000623	12
	20.1416	0.005639	0.000594	12	0.006167	0.000426	12			20.1416	0.0023	0.000233	12	0.003161	0.000331	12			20.1416	0.003549	0.000208	12	0.005764	0.000613	12
	20.2026	0.005628	0.00059	12	0.006136	0.000432	12			20.2026	0.002264	0.00023	12	0.003141	0.000331	12			20.2026	0.003525	0.000204	12	0.005735	0.000606	12
	20.2637	0.005617	0.00059	12	0.006092	0.000435	12			20.2637	0.002269	0.000231	12	0.003127	0.000322	12			20.2637	0.003508	0.000205	12	0.005716	0.000607	12
	20.3247	0.005592	0.000596	12	0.006057	0.000436	12			20.3247	0.002283	0.00023	12	0.003118	0.000312	12			20.3247	0.003496	0.000207	12	0.005708	0.000609	12
	20.3857	0.005556	0.0006	12	0.006037	0.000437	12			20.3857	0.002271	0.000225	12	0.003092	0.000308	12			20.3857	0.003484	0.000205	12	0.005695	0.000606	12
	20.4468	0.005523	0.000593	12	0.006017	0.000438	12			20.4468	0.002251	0.00022	12	0.003042	0.000303	12			20.4468	0.00347	0.000202	12	0.005666	0.000598	12
	20.5078	0.005496	0.00058	12	0.005984	0.000437	12			20.5078	0.002269	0.000224	12	0.003001	0.000295	12			20.5078	0.003458	0.0002	12	0.005627	0.000593	12
	20.5689	0.005474	0.000573	12	0.005947	0.000433	12			20.5689	0.002326	0.000239	12	0.003001	0.000291	12			20.5689	0.003449	0.000201	12	0.005593	0.000591	12
	20.6299	0.005457	0.000576	12	0.005916	0.000431	12			20.6299	0.002367	0.000249	12	0.00303	0.000301	12			20.6299	0.003437	0.0002	12	0.005572	0.00059	12
	20.6909	0.005441	0.00058	12	0.005891	0.000432	12			20.6909	0.002355	0.000245	12	0.003052	0.000314	12			20.6909	0.00342	0.000197	12	0.005558	0.000586	12
	20.752	0.005422	0.000576	12	0.005864	0.00043	12			20.752	0.002322	0.000235	12	0.003054	0.00032	12			20.752	0.003402	0.000195	12	0.005544	0.000583	12
	20.813	0.005393	0.000569	12	0.005838	0.000428	12			20.813	0.002316	0.000231	12	0.003052	0.000321	12			20.813	0.003389	0.000196	12	0.005526	0.000582	12
	20.874	0.00536	0.000566	12	0.005818	0.000426	12			20.874	0.002335	0.00023	12	0.003049	0.000328	12			20.874	0.003383	0.000196	12	0.005508	0.000581	12
	20.9351	0.00533	0.00057	12	0.005794	0.000426	12			20.9351	0.002337	0.000225	12	0.003041	0.000334	12			20.9351	0.003376	0.000192	12	0.005492	0.000575	12
	20.9961	0.005302	0.000573	12	0.005754	0.000427	12			20.9961	0.002309	0.000219	12	0.003036	0.00033	12			20.9961	0.003361	0.000186	12	0.005479	0.000569	12
	21.0571	0.005271	0.000569	12	0.005701	0.000425	12			21.0571	0.002284	0.000224	12	0.003051	0.000315	12			21.0571	0.003343	0.000185	12	0.005465	0.00057	12
	21.1182	0.005242	0.000561	12	0.005657	0.000421	12			21.1182	0.002291	0.000234	12	0.00307	0.000299	12			21.1182	0.00333	0.000188	12	0.005449	0.000577	12
	21.1792	0.005224	0.000558	12	0.005628	0.000418	12			21.1792	0.002309	0.000237	12	0.003045	0.000288	12			21.1792	0.003323	0.000189	12	0.005431	0.000583	12
	21.2402	0.005213	0.00056	12	0.0056	0.000418	12			21.2402	0.002305	0.00023	12	0.002968	0.00028	12			21.2402	0.003317	0.000184	12	0.005416	0.000583	12
	21.3013	0.005195	0.000561	12	0.005563	0.00042	12			21.3013	0.002278	0.000223	12	0.002895	0.000273	12			21.3013	0.003309	0.000179	12	0.005405	0.00058	12
	21.3623	0.00516	0.000557	12	0.005525	0.000423	12			21.3623	0.002262	0.000225	12	0.002879	0.000273	12			21.3623	0.003299	0.000179	12	0.005401	0.000583	12
	21.4233	0.005124	0.000553	12	0.0055	0.000426	12			21.4233	0.002276	0.000232	12	0.002909	0.000282	12			21.4233	0.00329	0.000183	12	0.0054	0.000591	12
	21.4844	0.005098	0.000552	12	0.005485	0.000427	12			21.4844	0.002305	0.000239	12	0.002926	0.000293	12			21.4844	0.003282	0.000185	12	0.005391	0.000596	12
	21.5454	0.005072	0.000552	12	0.005468	0.000423	12			21.5454	0.002327	0.00025	12	0.00291	0.000301	12			21.5454	0.003275	0.000183	12	0.005369	0.000593	12
	21.6064	0.00503	0.000547	12	0.005444	0.000417	12			21.6064	0.002339	0.000263	12	0.00289	0.000304	12			21.6064	0.003271	0.00018	12	0.005337	0.000587	12
	21.6675	0.004979	0.000536	12	0.005415	0.000413	12			21.6675	0.002347	0.000271	12	0.002896	0.000305	12			21.6675	0.003268	0.00018	12	0.005314	0.000586	12
	21.7285	0.004936	0.000528	12	0.005386	0.000414	12			21.7285	0.002355	0.000271	12	0.00292	0.000313	12			21.7285	0.00326	0.000181	12	0.005312	0.000593	12
	21.7895	0.004909	0.000527	12	0.005353	0.000416	12			21.7895	0.002359	0.00027	12	0.00294	0.000329	12			21.7895	0.003244	0.000179	12	0.005316	0.000598	12
	21.8506	0.004883	0.00053	12	0.005322	0.000416	12			21.8506	0.002354	0.000273	12	0.002947	0.000346	12			21.8506	0.003228	0.000177	12	0.005302	0.000594	12
	21.9116	0.004849	0.000532	12	0.005305	0.000415	12			21.9116	0.002339	0.000277	12	0.002948	0.000351	12			21.9116	0.003217	0.000177	12	0.005265	0.000588	12
	21.9727	0.004819	0.00053	12	0.005303	0.000416	12			21.9727	0.002318	0.000275	12	0.002947	0.000347	12			21.9727	0.003215	0.000178	12	0.00523	0.000589	12
	22.0337	0.004806	0.000527	12	0.005299	0.000419	12			22.0337	0.0023	0.000272	12	0.002943	0.00035	12			22.0337	0.003215	0.000179	12	0.005216	0.000595	12
	22.0947	0.004796	0.000526	12	0.005276	0.00042	12			22.0947	0.002298	0.000279	12	0.002939	0.000364	12			22.0947	0.00321	0.00018	12	0.005215	0.000597	12
	22.1558	0.004769	0.000523	12	0.005238	0.000419	12			22.1558	0.002308	0.000296	12	0.002935	0.000369	12			22.1558	0.003201	0.00018	12	0.005204	0.000593	12
	22.2168	0.004729	0.000516	12	0.005207	0.000417	12			22.2168	0.002314	0.000306	12	0.002925	0.000351	12			22.2168	0.003192	0.000182	12	0.00518	0.000592	12
	22.2778	0.004698	0.000509	12	0.005193	0.000417	12			22.2778	0.002305	0.000299	12	0.002906	0.000327	12			22.2778	0.003184	0.000184	12	0.005159	0.0006	12
	22.3389	0.004689	0.000508	12	0.005184	0.000418	12			22.3389	0.002291	0.000287	12	0.002886	0.000327	12			22.3389	0.003176	0.000186	12	0.005153	0.000612	12
	22.3999	0.004689	0.000514	12	0.005165	0.000418	12			22.3999	0.002287	0.000285	12	0.00287	0.000352	12			22.3999	0.003172	0.000188	12	0.005154	0.000618	12
	22.4609	0.004679	0.00052	12	0.005138	0.000419	12			22.4609	0.002291	0.000293	12	0.002865	0.000375	12			22.4609	0.00317	0.000191	12	0.005151	0.000621	12
	22.522	0.004657	0.000523	12	0.005117	0.000422	12			22.522	0.002292	0.000298	12	0.002876	0.000376	12			22.522	0.003168	0.000193	12	0.005145	0.000627	12
	22.583	0.004637	0.000523	12	0.005109	0.000426	12			22.583	0.002292	0.000299	12	0.002907	0.000372	12			22.583	0.003164	0.000194	12	0.005142	0.000636	12
	22.644	0.004622	0.000524	12	0.005106	0.000427	12			22.644	0.002304	0.000307	12	0.00295	0.000377	12			22.644	0.003159	0.000196	12	0.005134	0.000637	12
	22.7051	0.004606	0.000527	12	0.005098	0.000426	12			22.7051	0.002329	0.000323	12	0.002996	0.000386	12			22.7051	0.003154	0.000198	12	0.005112	0.000627	12
	22.7661	0.004582	0.000529	12	0.005081	0.000426	12			22.7661	0.002346	0.00033	12	0.00304	0.000392	12			22.7661	0.003149	0.000198	12	0.005081	0.000616	12
	22.8271	0.004555	0.000528	12	0.00506	0.000427	12			22.8271	0.002336	0.000318	12	0.003075	0.000399	12			22.8271	0.003141	0.000197	12	0.005055	0.000612	12
	22.8882	0.004534	0.000526	12	0.005037	0.00043	12			22.8882	0.002308	0.000299	12	0.003086	0.000412	12			22.8882	0.00313	0.000194	12	0.005045	0.000616	12
	22.9492	0.004522	0.000526	12	0.005015	0.000433	12			22.9492	0.00228	0.000291	12	0.003064	0.000422	12			22.9492	0.00312	0.000193	12	0.00504	0.000621	12
	23.0102	0.004517	0.000529	12	0.004998	0.000436	12			23.0102	0.002258	0.000294	12	0.00304	0.000422	12			23.0102	0.003109	0.000193	12	0.005029	0.000622	12
	23.0713	0.004513	0.000531	12	0.004988	0.000438	12			23.0713	0.002233	0.000294	12	0.003059	0.000425	12			23.0713	0.003096	0.000193	12	0.005009	0.00062	12
	23.1323	0.004507	0.000533	12	0.00498	0.000436	12			23.1323	0.002208	0.000285	12	0.003117	0.000439	12			23.1323	0.00308	0.000191	12	0.00499	0.000616	12
	23.1934	0.004497	0.000535	12	0.004967	0.000432	12			23.1934	0.002195	0.000277	12	0.003151	0.000455	12			23.1934	0.003066	0.000191	12	0.004985	0.000613	12
	23.2544	0.004487	0.000538	12	0.004948	0.00043	12			23.2544	0.002186	0.000277	12	0.003121	0.00045	12			23.2544	0.003062	0.000193	12	0.004991	0.000612	12
	23.3154	0.004478	0.000542	12	0.004928	0.00043	12			23.3154	0.002158	0.000272	12	0.003066	0.000427	12			23.3154	0.003064	0.000194	12	0.004994	0.000613	12
	23.3765	0.004465	0.000545	12	0.004913	0.000432	12			23.3765	0.002113	0.000255	12	0.003054	0.000417	12			23.3765	0.003065	0.000193	12	0.004981	0.000612	12
	23.4375	0.004444	0.000546	12	0.004902	0.000433	12			23.4375	0.002086	0.00024	12	0.003078	0.000428	12			23.4375	0.003057	0.000192	12	0.004957	0.000607	12
	23.4985	0.004419	0.000546	12	0.004895	0.000434	12			23.4985	0.002097	0.000247	12	0.003071	0.000431	12			23.4985	0.003044	0.000191	12	0.004938	0.000604	12
	23.5596	0.004398	0.000546	12	0.004894	0.000438	12			23.5596	0.002118	0.000261	12	0.003009	0.000412	12			23.5596	0.00303	0.000189	12	0.004933	0.000606	12
	23.6206	0.004382	0.000546	12	0.004892	0.000441	12			23.6206	0.002104	0.00026	12	0.002952	0.000393	12			23.6206	0.00302	0.000183	12	0.004931	0.000606	12
	23.6816	0.004361	0.000543	12	0.004879	0.000439	12			23.6816	0.002058	0.000242	12	0.002958	0.000405	12			23.6816	0.003014	0.000176	12	0.004919	0.000601	12
	23.7427	0.004334	0.000538	12	0.00485	0.00043	12			23.7427	0.002027	0.00023	12	0.002998	0.000432	12			23.7427	0.003011	0.000172	12	0.004898	0.000593	12
	23.8037	0.00431	0.000532	12	0.004819	0.000423	12			23.8037	0.002033	0.000241	12	0.002995	0.000436	12			23.8037	0.00301	0.000173	12	0.004883	0.000592	12
	23.8648	0.004299	0.000528	12	0.0048	0.000422	12			23.8648	0.002044	0.000257	12	0.002938	0.00041	12			23.8648	0.003009	0.000173	12	0.004884	0.000597	12
	23.9258	0.004293	0.000527	12	0.004791	0.000424	12			23.9258	0.002021	0.000254	12	0.002883	0.000389	12			23.9258	0.003007	0.000173	12	0.004888	0.000601	12
	23.9868	0.004277	0.000526	12	0.004779	0.000424	12			23.9868	0.001978	0.000238	12	0.002867	0.000397	12			23.9868	0.003005	0.000173	12	0.004882	0.000599	12
	24.0479	0.004251	0.000524	12	0.004758	0.000421	12			24.0479	0.001954	0.000228	12	0.002861	0.000413	12			24.0479	0.003004	0.000176	12	0.004867	0.000597	12
	24.1089	0.004231	0.000522	12	0.004741	0.000419	12			24.1089	0.00196	0.000234	12	0.002826	0.000413	12			24.1089	0.003001	0.000179	12	0.004857	0.000602	12
	24.1699	0.004224	0.000522	12	0.004736	0.000419	12			24.1699	0.001969	0.000241	12	0.002776	0.000403	12			24.1699	0.002993	0.000179	12	0.004861	0.000608	12
	24.231	0.004217	0.000526	12	0.004738	0.000418	12			24.231	0.00197	0.000239	12	0.002752	0.000406	12			24.231	0.002982	0.000176	12	0.004867	0.000609	12
	24.292	0.004196	0.00053	12	0.004731	0.000414	12			24.292	0.001979	0.000237	12	0.002753	0.000417	12			24.292	0.00297	0.000172	12	0.004863	0.000605	12
	24.353	0.004164	0.00053	12	0.004706	0.000411	12			24.353	0.001999	0.000244	12	0.002732	0.00041	12			24.353	0.002963	0.00017	12	0.004848	0.000606	12
	24.4141	0.004138	0.000528	12	0.004674	0.000409	12			24.4141	0.002003	0.000253	12	0.002666	0.000383	12			24.4141	0.002957	0.000171	12	0.004835	0.000612	12
	24.4751	0.004122	0.000525	12	0.004648	0.000409	12			24.4751	0.001978	0.00025	12	0.002596	0.000365	12			24.4751	0.002954	0.000172	12	0.004831	0.000619	12
	24.5361	0.00411	0.000526	12	0.004636	0.000408	12			24.5361	0.001951	0.000238	12	0.00257	0.000376	12			24.5361	0.002951	0.000174	12	0.004833	0.00062	12
	24.5972	0.0041	0.00053	12	0.004634	0.000409	12			24.5972	0.001954	0.000233	12	0.002578	0.000393	12			24.5972	0.002947	0.000174	12	0.004832	0.000619	12
	24.6582	0.004097	0.000537	12	0.004634	0.000415	12			24.6582	0.001983	0.000241	12	0.00256	0.000383	12			24.6582	0.002938	0.000174	12	0.004824	0.000621	12
	24.7192	0.004097	0.000542	12	0.004631	0.000422	12			24.7192	0.001998	0.000248	12	0.002493	0.000352	12			24.7192	0.002926	0.000173	12	0.004815	0.000627	12
	24.7803	0.004087	0.000543	12	0.004621	0.000427	12			24.7803	0.001984	0.000244	12	0.002427	0.000335	12			24.7803	0.002915	0.000172	12	0.004812	0.000629	12
	24.8413	0.004069	0.000542	12	0.004603	0.000425	12			24.8413	0.001961	0.000235	12	0.002415	0.000355	12			24.8413	0.002908	0.000171	12	0.004807	0.000624	12
	24.9023	0.004059	0.000544	12	0.004581	0.00042	12			24.9023	0.001949	0.000233	12	0.002447	0.000389	12			24.9023	0.002901	0.00017	12	0.004794	0.000617	12
	24.9634	0.004067	0.000549	12	0.004563	0.000417	12			24.9634	0.00194	0.000239	12	0.002462	0.000399	12			24.9634	0.002889	0.000172	12	0.004778	0.000614	12
	25.0244	0.004077	0.000554	12	0.00455	0.000416	12			25.0244	0.001919	0.000246	12	0.002436	0.000381	12			25.0244	0.002876	0.000176	12	0.00477	0.000619	12
	25.0855	0.004067	0.000556	12	0.004539	0.000416	12			25.0855	0.001895	0.000246	12	0.002403	0.000365	12			25.0855	0.002864	0.000179	12	0.004771	0.000624	12
	25.1465	0.004038	0.000554	12	0.004528	0.000415	12			25.1465	0.001886	0.000241	12	0.002399	0.000369	12			25.1465	0.002855	0.000181	12	0.004757	0.000621	12
	25.2075	0.004015	0.000552	12	0.00452	0.000415	12			25.2075	0.001891	0.000241	12	0.0024	0.000381	12			25.2075	0.002843	0.00018	12	0.004718	0.000609	12
	25.2686	0.00401	0.000553	12	0.004516	0.000417	12			25.2686	0.001893	0.000243	12	0.002371	0.000378	12			25.2686	0.002826	0.000179	12	0.004671	0.000595	12
	25.3296	0.004007	0.000556	12	0.004511	0.00042	12			25.3296	0.001888	0.00024	12	0.002324	0.000361	12			25.3296	0.002811	0.000183	12	0.004646	0.000587	12
	25.3906	0.003993	0.000557	12	0.004497	0.000422	12			25.3906	0.001887	0.000234	12	0.002303	0.000348	12			25.3906	0.002802	0.000187	12	0.004643	0.000585	12
	25.4517	0.003973	0.000556	12	0.004475	0.000421	12			25.4517	0.001893	0.000228	12	0.002317	0.000346	12			25.4517	0.002794	0.000188	12	0.004635	0.000585	12
	25.5127	0.003961	0.000555	12	0.004455	0.000422	12			25.5127	0.001896	0.000225	12	0.002325	0.000346	12			25.5127	0.002781	0.000186	12	0.00461	0.000583	12
	25.5737	0.003958	0.000556	12	0.004443	0.000426	12			25.5737	0.001889	0.000221	12	0.002295	0.000336	12			25.5737	0.002763	0.000183	12	0.004585	0.000584	12
	25.6348	0.003952	0.000561	12	0.004435	0.000431	12			25.6348	0.00188	0.000212	12	0.002251	0.000318	12			25.6348	0.002749	0.000183	12	0.004583	0.000591	12
	25.6958	0.003938	0.000566	12	0.004427	0.000434	12			25.6958	0.001887	0.000208	12	0.002229	0.000306	12			25.6958	0.002744	0.000185	12	0.004593	0.0006	12
	25.7568	0.003928	0.000569	12	0.004421	0.000434	12			25.7568	0.001911	0.000218	12	0.00223	0.000304	12			25.7568	0.002739	0.000185	12	0.004595	0.000605	12
	25.8179	0.003925	0.000568	12	0.004426	0.000436	12			25.8179	0.001941	0.000238	12	0.002226	0.000306	12			25.8179	0.002727	0.000183	12	0.004583	0.000605	12
	25.8789	0.003918	0.000563	12	0.00444	0.000443	12			25.8789	0.001962	0.000254	12	0.002205	0.000299	12			25.8789	0.002713	0.000181	12	0.004568	0.000602	12
	25.9399	0.003897	0.000555	12	0.004446	0.000449	12			25.9399	0.00197	0.000252	12	0.002186	0.000287	12			25.9399	0.002705	0.000181	12	0.004556	0.000602	12
	26.001	0.003869	0.000546	12	0.004434	0.000449	12			26.001	0.001966	0.000244	12	0.002184	0.000278	12			26.001	0.002705	0.000182	12	0.004543	0.000604	12
	26.062	0.003852	0.000539	12	0.004413	0.000444	12			26.062	0.001953	0.000242	12	0.002197	0.000278	12			26.062	0.002705	0.000182	12	0.004532	0.000607	12
	26.123	0.003846	0.000534	12	0.0044	0.000443	12			26.123	0.001931	0.000244	12	0.002213	0.000282	12			26.123	0.002698	0.000181	12	0.004529	0.000609	12
	26.1841	0.003839	0.000531	12	0.004399	0.000446	12			26.1841	0.001902	0.000238	12	0.002227	0.000285	12			26.1841	0.002687	0.00018	12	0.004533	0.000609	12
	26.2451	0.00382	0.000527	12	0.004399	0.000451	12			26.2451	0.001875	0.000224	12	0.00223	0.000281	12			26.2451	0.002677	0.000181	12	0.004527	0.000607	12
	26.3061	0.003794	0.000524	12	0.004392	0.000453	12			26.3061	0.001867	0.000216	12	0.002223	0.000278	12			26.3061	0.00267	0.000181	12	0.004506	0.000604	12
	26.3672	0.003779	0.000524	12	0.004383	0.000454	12			26.3672	0.001881	0.000223	12	0.002221	0.000289	12			26.3672	0.002665	0.00018	12	0.004486	0.000604	12
	26.4282	0.003777	0.000527	12	0.004379	0.000456	12			26.4282	0.001902	0.000233	12	0.002239	0.000312	12			26.4282	0.002661	0.000178	12	0.004484	0.000606	12
	26.4893	0.003776	0.000529	12	0.004376	0.000457	12			26.4893	0.001907	0.000232	12	0.00227	0.000332	12			26.4893	0.00266	0.000176	12	0.004484	0.000608	12
	26.5503	0.003765	0.000529	12	0.00437	0.000457	12			26.5503	0.001891	0.000221	12	0.002286	0.000333	12			26.5503	0.002659	0.000174	12	0.004467	0.000605	12
	26.6113	0.003748	0.000526	12	0.00436	0.000456	12			26.6113	0.001869	0.000212	12	0.002277	0.000321	12			26.6113	0.002657	0.000171	12	0.004435	0.000599	12
	26.6724	0.003735	0.000523	12	0.004352	0.000458	12			26.6724	0.001858	0.000212	12	0.002257	0.00031	12			26.6724	0.002653	0.000169	12	0.004417	0.000597	12
	26.7334	0.003732	0.000524	12	0.004346	0.000461	12			26.7334	0.001859	0.000215	12	0.00225	0.000303	12			26.7334	0.00265	0.000168	12	0.004421	0.000598	12
	26.7944	0.003729	0.000527	12	0.004342	0.000463	12			26.7944	0.001862	0.000213	12	0.002254	0.000302	12			26.7944	0.002647	0.00017	12	0.004426	0.000599	12
	26.8555	0.003721	0.000531	12	0.004339	0.000463	12			26.8555	0.00186	0.000209	12	0.002265	0.000307	12			26.8555	0.002642	0.000171	12	0.004413	0.000595	12
	26.9165	0.003715	0.000533	12	0.004336	0.000465	12			26.9165	0.001849	0.000207	12	0.002282	0.000317	12			26.9165	0.002634	0.00017	12	0.004392	0.000588	12
	26.9775	0.003719	0.000533	12	0.004329	0.000466	12			26.9775	0.001827	0.000204	12	0.002304	0.000328	12			26.9775	0.002628	0.000168	12	0.00438	0.00058	12
	27.0386	0.003725	0.000532	12	0.004316	0.000465	12			27.0386	0.001798	0.000195	12	0.002307	0.000329	12			27.0386	0.002627	0.000169	12	0.004373	0.000572	12
	27.0996	0.00372	0.000531	12	0.004302	0.000462	12			27.0996	0.001772	0.000181	12	0.002273	0.000317	12			27.0996	0.002627	0.000172	12	0.004351	0.000564	12
	27.1606	0.0037	0.000529	12	0.004293	0.000462	12			27.1606	0.001751	0.000171	12	0.002223	0.0003	12			27.1606	0.002625	0.000173	12	0.004317	0.000558	12
	27.2217	0.003682	0.000528	12	0.004288	0.000463	12			27.2217	0.001731	0.000168	12	0.002198	0.000291	12			27.2217	0.002621	0.000172	12	0.004298	0.000557	12
	27.2827	0.003679	0.000532	12	0.004281	0.000463	12			27.2827	0.001715	0.00017	12	0.002213	0.00029	12			27.2827	0.002619	0.00017	12	0.004303	0.000562	12
	27.3438	0.003684	0.000537	12	0.004272	0.000461	12			27.3438	0.001717	0.000174	12	0.002238	0.000292	12			27.3438	0.002619	0.000169	12	0.004316	0.000568	12
	27.4048	0.00368	0.000539	12	0.004263	0.000459	12			27.4048	0.001751	0.000179	12	0.00224	0.000296	12			27.4048	0.002616	0.00017	12	0.004315	0.000569	12
	27.4658	0.003661	0.000539	12	0.004256	0.000459	12			27.4658	0.001795	0.000185	12	0.002221	0.000302	12			27.4658	0.002607	0.000172	12	0.004308	0.000565	12
	27.5269	0.003645	0.000539	12	0.004247	0.00046	12			27.5269	0.001818	0.000189	12	0.002207	0.000307	12			27.5269	0.002599	0.000173	12	0.004308	0.000561	12
	27.5879	0.003644	0.000542	12	0.004234	0.000461	12			27.5879	0.00181	0.000192	12	0.002203	0.000307	12			27.5879	0.002597	0.000172	12	0.004316	0.000559	12
	27.6489	0.003654	0.000546	12	0.00422	0.000463	12			27.6489	0.001789	0.000194	12	0.002193	0.000299	12			27.6489	0.002597	0.000171	12	0.004315	0.000558	12
	27.71	0.003659	0.000548	12	0.004209	0.000464	12			27.71	0.001771	0.00019	12	0.002165	0.000287	12			27.71	0.002592	0.000169	12	0.004298	0.000554	12
	27.771	0.003655	0.000548	12	0.004198	0.000462	12			27.771	0.00175	0.000178	12	0.00213	0.000277	12			27.771	0.002577	0.000167	12	0.004278	0.00055	12
	27.832	0.003645	0.000549	12	0.004185	0.00046	12			27.832	0.001725	0.000166	12	0.002109	0.000271	12			27.832	0.00256	0.000167	12	0.004267	0.000548	12
	27.8931	0.003636	0.000552	12	0.004176	0.000461	12			27.8931	0.001713	0.000163	12	0.002111	0.000267	12			27.8931	0.002553	0.000169	12	0.004262	0.000552	12
	27.9541	0.003628	0.000557	12	0.004178	0.000468	12			27.9541	0.001733	0.000174	12	0.002126	0.00026	12			27.9541	0.002556	0.000171	12	0.004258	0.000558	12
	28.0151	0.003619	0.000561	12	0.004188	0.000476	12			28.0151	0.001766	0.000183	12	0.002132	0.000249	12			28.0151	0.002561	0.000172	12	0.00426	0.000562	12
	28.0762	0.00361	0.000563	12	0.004196	0.00048	12			28.0762	0.001774	0.000186	12	0.002115	0.000238	12			28.0762	0.002559	0.000172	12	0.004269	0.000562	12
	28.1372	0.0036	0.000561	12	0.004195	0.000479	12			28.1372	0.001748	0.000182	12	0.002076	0.00023	12			28.1372	0.00255	0.000171	12	0.004281	0.000562	12
	28.1982	0.003586	0.000558	12	0.004187	0.000476	12			28.1982	0.00172	0.000177	12	0.002032	0.000222	12			28.1982	0.002543	0.00017	12	0.004284	0.000567	12
	28.2593	0.00357	0.000554	12	0.00418	0.000475	12			28.2593	0.001722	0.000182	12	0.001997	0.000213	12			28.2593	0.002542	0.000168	12	0.004277	0.000574	12
	28.3203	0.003558	0.000551	12	0.004178	0.000478	12			28.3203	0.001749	0.000192	12	0.001977	0.000208	12			28.3203	0.002545	0.000165	12	0.004269	0.000578	12
	28.3814	0.003553	0.000552	12	0.00418	0.000483	12			28.3814	0.001774	0.0002	12	0.001976	0.000213	12			28.3814	0.002544	0.000165	12	0.004266	0.000577	12
	28.4424	0.003549	0.000554	12	0.004178	0.000486	12			28.4424	0.00178	0.000201	12	0.001991	0.000227	12			28.4424	0.002535	0.000167	12	0.004266	0.000575	12
	28.5034	0.003543	0.000554	12	0.004169	0.000486	12			28.5034	0.001774	0.000198	12	0.002017	0.000241	12			28.5034	0.002524	0.00017	12	0.004265	0.000575	12
	28.5645	0.003535	0.000552	12	0.004155	0.000483	12			28.5645	0.001773	0.0002	12	0.002032	0.000243	12			28.5645	0.002518	0.000169	12	0.00426	0.000578	12
	28.6255	0.003531	0.00055	12	0.004143	0.00048	12			28.6255	0.001781	0.000207	12	0.002024	0.000234	12			28.6255	0.002519	0.000167	12	0.004253	0.000577	12
	28.6865	0.003531	0.000551	12	0.004139	0.000481	12			28.6865	0.001788	0.000207	12	0.002006	0.000225	12			28.6865	0.002519	0.000166	12	0.004245	0.000571	12
	28.7476	0.003528	0.000553	12	0.004137	0.000485	12			28.7476	0.001777	0.000193	12	0.002003	0.000218	12			28.7476	0.002512	0.000166	12	0.004237	0.000565	12
	28.8086	0.003518	0.000553	12	0.00413	0.000489	12			28.8086	0.00175	0.00018	12	0.002012	0.000215	12			28.8086	0.0025	0.000165	12	0.004233	0.000563	12
	28.8696	0.003503	0.00055	12	0.004122	0.000491	12			28.8696	0.001727	0.000183	12	0.002008	0.000213	12			28.8696	0.002491	0.000162	12	0.004231	0.000564	12
	28.9307	0.00349	0.000545	12	0.004124	0.000492	12			28.9307	0.001727	0.000194	12	0.00198	0.000215	12			28.9307	0.002488	0.00016	12	0.004227	0.000564	12
	28.9917	0.003482	0.000543	12	0.004143	0.000494	12			28.9917	0.001741	0.000195	12	0.001953	0.000219	12			28.9917	0.002485	0.000161	12	0.004221	0.000563	12
	29.0527	0.003477	0.000546	12	0.004166	0.000498	12			29.0527	0.001748	0.000184	12	0.001954	0.000223	12			29.0527	0.002481	0.000163	12	0.004219	0.000563	12
	29.1138	0.003468	0.000552	12	0.004177	0.000501	12			29.1138	0.001737	0.000178	12	0.001976	0.000219	12			29.1138	0.002476	0.000163	12	0.004223	0.000568	12
	29.1748	0.00346	0.000553	12	0.004174	0.000502	12			29.1748	0.001723	0.000182	12	0.001984	0.000211	12			29.1748	0.002472	0.000161	12	0.00423	0.000572	12
	29.2358	0.003458	0.000551	12	0.004167	0.000501	12			29.2358	0.001716	0.00019	12	0.001972	0.000206	12			29.2358	0.002465	0.000159	12	0.004235	0.000573	12
	29.2969	0.003463	0.000549	12	0.004168	0.000499	12			29.2969	0.001711	0.000187	12	0.001962	0.000211	12			29.2969	0.002452	0.000157	12	0.004236	0.000574	12
	29.3579	0.003464	0.000552	12	0.004175	0.000501	12			29.3579	0.001702	0.000178	12	0.00197	0.000219	12			29.3579	0.002435	0.000156	12	0.004234	0.000576	12
	29.4189	0.003454	0.000556	12	0.004179	0.000505	12			29.4189	0.001699	0.000178	12	0.001983	0.00022	12			29.4189	0.002427	0.000155	12	0.004229	0.000579	12
	29.48	0.003438	0.000556	12	0.004176	0.000509	12			29.48	0.001713	0.000189	12	0.001983	0.000215	12			29.48	0.002429	0.000155	12	0.004222	0.000578	12
	29.541	0.003425	0.000551	12	0.004168	0.000509	12			29.541	0.001731	0.000199	12	0.001976	0.000212	12			29.541	0.002436	0.000155	12	0.004216	0.000575	12
	29.602	0.003417	0.000546	12	0.004162	0.000506	12			29.602	0.00173	0.000199	12	0.001975	0.000215	12			29.602	0.002436	0.000156	12	0.004217	0.000572	12
	29.6631	0.003409	0.000544	12	0.00416	0.000506	12			29.6631	0.001713	0.000195	12	0.001971	0.000218	12			29.6631	0.002429	0.000158	12	0.004221	0.000571	12
	29.7241	0.003396	0.000542	12	0.004158	0.000509	12			29.7241	0.001709	0.000198	12	0.00195	0.000217	12			29.7241	0.002424	0.000161	12	0.004223	0.00057	12
	29.7852	0.003385	0.000542	12	0.004155	0.000512	12			29.7852	0.00173	0.000208	12	0.001918	0.000218	12			29.7852	0.002429	0.000163	12	0.004221	0.000567	12
	29.8462	0.003381	0.000544	12	0.004152	0.000511	12			29.8462	0.001754	0.000214	12	0.001906	0.000231	12			29.8462	0.002436	0.000163	12	0.004219	0.000564	12
	29.9072	0.003379	0.000549	12	0.004153	0.000511	12			29.9072	0.001757	0.00021	12	0.001925	0.000252	12			29.9072	0.002437	0.000163	12	0.004221	0.000564	12
	29.9683	0.00337	0.000551	12	0.00416	0.000515	12			29.9683	0.001744	0.000202	12	0.001953	0.000264	12			29.9683	0.002429	0.000164	12	0.004228	0.000567	12
