# Supplementary material for: Microglia facilitate and stabilize the response to general anesthesia via modulating the neuronal network in a brain region-specific manner
Source: eLife. 2023 Dec 22;12:RP92252. doi: 10.7554/eLife.92252 (PMC10746144; doi:10.7554/eLife.92252)
Supplement: Figure 6—source data 3. [file elife-92252-fig6-data3.xlsx]

## Sheet: Figure 6E
		RMS of EMG
		D7			D21
	Time after pentobarbital injection	Mean	SEM	N	Mean	SEM	N
	-1198.75	0.051118	0.008116	12	0.066321	0.017593	12
	-1197.5	0.050782	0.00836	12	0.066179	0.017714	12
	-1196.25	0.04944	0.00815	12	0.067163	0.017811	12
	-1195	0.04709	0.008187	12	0.067016	0.017665	12
	-1193.75	0.046837	0.008629	12	0.067223	0.017578	12
	-1192.5	0.047039	0.008857	12	0.067813	0.017371	12
	-1191.25	0.049543	0.008877	12	0.067956	0.017229	12
	-1190	0.051785	0.009269	12	0.067455	0.016969	12
	-1188.75	0.052035	0.009349	12	0.067972	0.016558	12
	-1187.5	0.052301	0.009475	12	0.069119	0.016761	12
	-1186.25	0.051441	0.008887	12	0.069254	0.016274	12
	-1185	0.050924	0.008501	12	0.070477	0.016496	12
	-1183.75	0.050182	0.008109	12	0.071749	0.016727	12
	-1182.5	0.050634	0.00809	12	0.072519	0.016748	12
	-1181.25	0.050783	0.007934	12	0.072441	0.0167	12
	-1180	0.050435	0.008166	12	0.072641	0.016634	12
	-1178.75	0.05022	0.008473	12	0.073375	0.017088	12
	-1177.5	0.052052	0.008415	12	0.073477	0.016865	12
	-1176.25	0.052885	0.008405	12	0.073345	0.01684	12
	-1175	0.052743	0.008312	12	0.073468	0.01659	12
	-1173.75	0.051668	0.008111	12	0.072989	0.016365	12
	-1172.5	0.050888	0.007986	12	0.072327	0.016474	12
	-1171.25	0.049285	0.007805	12	0.07214	0.01668	12
	-1170	0.046621	0.007481	12	0.071465	0.016424	12
	-1168.75	0.046302	0.007752	12	0.070858	0.016525	12
	-1167.5	0.045687	0.008047	12	0.070589	0.01634	12
	-1166.25	0.045586	0.0082	12	0.069892	0.016573	12
	-1165	0.046781	0.008515	12	0.069114	0.016737	12
	-1163.75	0.047686	0.009395	12	0.068316	0.016304	12
	-1162.5	0.047539	0.009358	12	0.068376	0.016086	12
	-1161.25	0.047475	0.009147	12	0.06858	0.015716	12
	-1160	0.047401	0.009009	12	0.06842	0.015824	12
	-1158.75	0.047276	0.008834	12	0.068081	0.015301	12
	-1157.5	0.046037	0.00863	12	0.068278	0.015593	12
	-1156.25	0.045083	0.008838	12	0.068917	0.015543	12
	-1155	0.045262	0.008928	12	0.069836	0.015137	12
	-1153.75	0.045153	0.008976	12	0.070415	0.015127	12
	-1152.5	0.045685	0.009302	12	0.071914	0.015555	12
	-1151.25	0.045853	0.009316	12	0.071902	0.015492	12
	-1150	0.046596	0.009445	12	0.07277	0.015667	12
	-1148.75	0.046945	0.009413	12	0.072627	0.015656	12
	-1147.5	0.046765	0.009497	12	0.071808	0.015587	12
	-1146.25	0.046888	0.009613	12	0.071912	0.015693	12
	-1145	0.046089	0.009376	12	0.071864	0.015558	12
	-1143.75	0.045779	0.008911	12	0.071181	0.015495	12
	-1142.5	0.045561	0.008947	12	0.070262	0.015541	12
	-1141.25	0.045869	0.009024	12	0.069709	0.015848	12
	-1140	0.045863	0.008852	12	0.06782	0.015389	12
	-1138.75	0.046231	0.008753	12	0.065073	0.015832	12
	-1137.5	0.046157	0.008655	12	0.065049	0.016569	12
	-1136.25	0.045915	0.00871	12	0.063679	0.017127	12
	-1135	0.045133	0.008657	12	0.063042	0.017554	12
	-1133.75	0.045127	0.008428	12	0.062505	0.017883	12
	-1132.5	0.044363	0.008062	12	0.060154	0.017442	12
	-1131.25	0.043962	0.007998	12	0.06035	0.017562	12
	-1130	0.043183	0.00801	12	0.061394	0.017905	12
	-1128.75	0.042058	0.00797	12	0.061066	0.017735	12
	-1127.5	0.041369	0.007914	12	0.059822	0.017269	12
	-1126.25	0.040651	0.007586	12	0.060895	0.017058	12
	-1125	0.040427	0.007228	12	0.061482	0.017147	12
	-1123.75	0.039421	0.00658	12	0.062159	0.017233	12
	-1122.5	0.040135	0.006346	12	0.061898	0.016983	12
	-1121.25	0.039658	0.006178	12	0.060925	0.01646	12
	-1120	0.03971	0.006248	12	0.061744	0.016264	12
	-1118.75	0.039508	0.006295	12	0.062738	0.015948	12
	-1117.5	0.038744	0.006163	12	0.062279	0.015995	12
	-1116.25	0.038444	0.005897	12	0.065271	0.017355	12
	-1115	0.037595	0.005592	12	0.066643	0.017737	12
	-1113.75	0.037234	0.005476	12	0.069297	0.018234	12
	-1112.5	0.037084	0.005426	12	0.070834	0.018409	12
	-1111.25	0.037226	0.00536	12	0.071438	0.018279	12
	-1110	0.038008	0.005557	12	0.071291	0.017962	12
	-1108.75	0.038183	0.005475	12	0.071563	0.018174	12
	-1107.5	0.038773	0.005652	12	0.072318	0.018636	12
	-1106.25	0.039069	0.005849	12	0.0723	0.018615	12
	-1105	0.039182	0.005978	12	0.072549	0.018467	12
	-1103.75	0.039281	0.006009	12	0.073339	0.018541	12
	-1102.5	0.038414	0.00622	12	0.074284	0.018841	12
	-1101.25	0.038716	0.006528	12	0.074926	0.019187	12
	-1100	0.039031	0.006554	12	0.074883	0.019455	12
	-1098.75	0.039064	0.006452	12	0.074775	0.019637	12
	-1097.5	0.03993	0.006871	12	0.074903	0.019435	12
	-1096.25	0.039613	0.006888	12	0.073218	0.018457	12
	-1095	0.040428	0.006972	12	0.072304	0.018153	12
	-1093.75	0.040856	0.007265	12	0.072109	0.017853	12
	-1092.5	0.040919	0.007268	12	0.072268	0.018174	12
	-1091.25	0.040529	0.007198	12	0.074111	0.018285	12
	-1090	0.039934	0.006809	12	0.076528	0.019589	12
	-1088.75	0.039956	0.006715	12	0.078122	0.019861	12
	-1087.5	0.039684	0.006474	12	0.078613	0.020087	12
	-1086.25	0.039638	0.00635	12	0.078908	0.020114	12
	-1085	0.039738	0.006337	12	0.079948	0.020469	12
	-1083.75	0.039318	0.006322	12	0.079335	0.020704	12
	-1082.5	0.039802	0.006148	12	0.079313	0.021005	12
	-1081.25	0.039428	0.006102	12	0.080566	0.021308	12
	-1080	0.03887	0.006197	12	0.081784	0.021408	12
	-1078.75	0.039035	0.006454	12	0.081876	0.021739	12
	-1077.5	0.038015	0.00596	12	0.081087	0.021556	12
	-1076.25	0.038226	0.00621	12	0.080712	0.021136	12
	-1075	0.037681	0.006254	12	0.080864	0.021107	12
	-1073.75	0.038134	0.006625	12	0.07949	0.020835	12
	-1072.5	0.038196	0.006636	12	0.078383	0.020883	12
	-1071.25	0.038096	0.006731	12	0.076814	0.021092	12
	-1070	0.037862	0.00668	12	0.074151	0.020013	12
	-1068.75	0.037951	0.006653	12	0.073087	0.020045	12
	-1067.5	0.037352	0.006656	12	0.073101	0.019735	12
	-1066.25	0.037201	0.006726	12	0.073486	0.020103	12
	-1065	0.037102	0.006943	12	0.071763	0.020045	12
	-1063.75	0.038123	0.007255	12	0.071717	0.020327	12
	-1062.5	0.038062	0.007583	12	0.071777	0.019944	12
	-1061.25	0.040362	0.007348	12	0.069618	0.019512	12
	-1060	0.040869	0.007277	12	0.068933	0.020057	12
	-1058.75	0.042601	0.007524	12	0.070953	0.020778	12
	-1057.5	0.042977	0.007784	12	0.071512	0.020947	12
	-1056.25	0.04372	0.00796	12	0.071803	0.020699	12
	-1055	0.044316	0.007949	12	0.071834	0.020821	12
	-1053.75	0.043905	0.007627	12	0.072897	0.020892	12
	-1052.5	0.043854	0.007884	12	0.073121	0.020556	12
	-1051.25	0.044787	0.008606	12	0.073245	0.020355	12
	-1050	0.045699	0.009041	12	0.072629	0.020464	12
	-1048.75	0.045539	0.009301	12	0.072243	0.020367	12
	-1047.5	0.045948	0.009473	12	0.073489	0.0217	12
	-1046.25	0.046377	0.009556	12	0.073513	0.021406	12
	-1045	0.047226	0.010065	12	0.073914	0.021674	12
	-1043.75	0.047509	0.010196	12	0.074634	0.021631	12
	-1042.5	0.047525	0.010191	12	0.074967	0.022313	12
	-1041.25	0.046675	0.009964	12	0.076121	0.022937	12
	-1040	0.047098	0.009836	12	0.076952	0.022294	12
	-1038.75	0.045948	0.009108	12	0.076012	0.021004	12
	-1037.5	0.046383	0.008987	12	0.075584	0.020588	12
	-1036.25	0.045628	0.008657	12	0.076784	0.02103	12
	-1035	0.044735	0.008615	12	0.0777	0.021111	12
	-1033.75	0.044339	0.008528	12	0.077177	0.020873	12
	-1032.5	0.04459	0.008386	12	0.077086	0.020989	12
	-1031.25	0.043726	0.007613	12	0.076668	0.020736	12
	-1030	0.043773	0.007449	12	0.076656	0.020697	12
	-1028.75	0.045192	0.008392	12	0.077109	0.02057	12
	-1027.5	0.045345	0.008771	12	0.07717	0.019403	12
	-1026.25	0.046054	0.009197	12	0.076193	0.019301	12
	-1025	0.045954	0.009124	12	0.075764	0.018994	12
	-1023.75	0.059343	0.021053	12	0.075557	0.018444	12
	-1022.5	0.06166	0.023366	12	0.075019	0.017326	12
	-1021.25	0.061687	0.023521	12	0.075027	0.016924	12
	-1020	0.062205	0.023489	12	0.075532	0.017209	12
	-1018.75	0.062745	0.023481	12	0.074621	0.017179	12
	-1017.5	0.062213	0.023495	12	0.075394	0.017835	12
	-1016.25	0.062417	0.023517	12	0.074146	0.017595	12
	-1015	0.062955	0.023473	12	0.073533	0.017304	12
	-1013.75	0.062772	0.023492	12	0.074218	0.017025	12
	-1012.5	0.06287	0.02349	12	0.07391	0.016982	12
	-1011.25	0.063261	0.023719	12	0.074468	0.017086	12
	-1010	0.063471	0.02388	12	0.074665	0.017191	12
	-1008.75	0.064479	0.023501	12	0.074732	0.01749	12
	-1007.5	0.064582	0.02328	12	0.073341	0.018296	12
	-1006.25	0.06423	0.023169	12	0.0726	0.018695	12
	-1005	0.063539	0.023288	12	0.071768	0.018602	12
	-1003.75	0.055167	0.015544	12	0.071267	0.018719	12
	-1002.5	0.057484	0.018042	12	0.070294	0.019086	12
	-1001.25	0.056915	0.017823	12	0.069149	0.018665	12
	-1000	0.055264	0.017864	12	0.067704	0.018061	12
	-998.75	0.055001	0.017908	12	0.06716	0.017804	12
	-997.5	0.055393	0.018411	12	0.065926	0.016889	12
	-996.25	0.058695	0.021582	12	0.06482	0.016402	12
	-995	0.059608	0.022117	12	0.06459	0.015998	12
	-993.75	0.06157	0.022719	12	0.064036	0.015826	12
	-992.5	0.061978	0.023298	12	0.06411	0.016071	12
	-991.25	0.061807	0.023443	12	0.063696	0.01654	12
	-990	0.061865	0.023479	12	0.062307	0.016085	12
	-988.75	0.06131	0.023753	12	0.060595	0.015651	12
	-987.5	0.06386	0.025293	12	0.058079	0.014326	12
	-986.25	0.069125	0.030991	12	0.057532	0.013892	12
	-985	0.068975	0.030903	12	0.058409	0.01388	12
	-983.75	0.067659	0.029508	12	0.058464	0.014099	12
	-982.5	0.06467	0.025937	12	0.05917	0.014267	12
	-981.25	0.065334	0.026046	12	0.061268	0.014115	12
	-980	0.06667	0.025958	12	0.062458	0.014404	12
	-978.75	0.067303	0.025854	12	0.063937	0.014719	12
	-977.5	0.067496	0.025501	12	0.069046	0.015221	12
	-976.25	0.065012	0.022761	12	0.072366	0.015783	12
	-975	0.064595	0.022257	12	0.074778	0.016374	12
	-973.75	0.064175	0.021604	12	0.074667	0.016819	12
	-972.5	0.065302	0.021801	12	0.074799	0.016886	12
	-971.25	0.065828	0.021782	12	0.076314	0.017023	12
	-970	0.065682	0.021801	12	0.077994	0.017565	12
	-968.75	0.064998	0.021413	12	0.079204	0.017836	12
	-967.5	0.063236	0.019521	12	0.080113	0.018149	12
	-966.25	0.052836	0.010474	12	0.08117	0.018454	12
	-965	0.052792	0.010523	12	0.080608	0.018317	12
	-963.75	0.052837	0.010731	12	0.080367	0.018324	12
	-962.5	0.053369	0.011448	12	0.080125	0.018547	12
	-961.25	0.054687	0.012616	12	0.079465	0.018595	12
	-960	0.054246	0.013171	12	0.079061	0.018743	12
	-958.75	0.054205	0.013919	12	0.079182	0.018674	12
	-957.5	0.053701	0.014079	12	0.077748	0.017819	12
	-956.25	0.053448	0.014093	12	0.075881	0.017296	12
	-955	0.052598	0.014012	12	0.072852	0.016755	12
	-953.75	0.051457	0.014158	12	0.073324	0.016537	12
	-952.5	0.049295	0.013198	12	0.0736	0.017036	12
	-951.25	0.04888	0.012682	12	0.071504	0.016619	12
	-950	0.050088	0.012352	12	0.069964	0.016385	12
	-948.75	0.051718	0.012753	12	0.06857	0.016463	12
	-947.5	0.052318	0.012873	12	0.067255	0.016372	12
	-946.25	0.052437	0.013259	12	0.066218	0.016175	12
	-945	0.052453	0.013044	12	0.06592	0.016161	12
	-943.75	0.051759	0.01264	12	0.065736	0.016143	12
	-942.5	0.050805	0.011956	12	0.065364	0.015753	12
	-941.25	0.049718	0.01076	12	0.06596	0.01611	12
	-940	0.049715	0.010428	12	0.06574	0.016739	12
	-938.75	0.049341	0.00992	12	0.065783	0.017296	12
	-937.5	0.049736	0.009837	12	0.06533	0.01776	12
	-936.25	0.051207	0.010136	12	0.066021	0.01784	12
	-935	0.052771	0.011228	12	0.066906	0.018275	12
	-933.75	0.054179	0.012098	12	0.066339	0.018339	12
	-932.5	0.054295	0.011821	12	0.066526	0.018054	12
	-931.25	0.055564	0.012125	12	0.068273	0.017929	12
	-930	0.054656	0.011948	12	0.068664	0.017809	12
	-928.75	0.053862	0.011587	12	0.068409	0.017751	12
	-927.5	0.05349	0.011578	12	0.06836	0.017689	12
	-926.25	0.053117	0.010887	12	0.068814	0.017787	12
	-925	0.053399	0.011089	12	0.069352	0.018219	12
	-923.75	0.054652	0.01126	12	0.069827	0.017972	12
	-922.5	0.054709	0.01128	12	0.070486	0.017615	12
	-921.25	0.054263	0.010942	12	0.070332	0.017523	12
	-920	0.054668	0.010735	12	0.068899	0.016899	12
	-918.75	0.054363	0.01043	12	0.068857	0.016621	12
	-917.5	0.054258	0.010242	12	0.068054	0.016162	12
	-916.25	0.054031	0.010062	12	0.067732	0.016251	12
	-915	0.053989	0.009066	12	0.067639	0.016022	12
	-913.75	0.051971	0.008339	12	0.066864	0.015591	12
	-912.5	0.052046	0.008275	12	0.064524	0.014923	12
	-911.25	0.05026	0.007763	12	0.08002	0.019728	12
	-910	0.049921	0.00768	12	0.079136	0.019993	12
	-908.75	0.049398	0.007352	12	0.082452	0.02281	12
	-907.5	0.048295	0.007208	12	0.082162	0.023144	12
	-906.25	0.04775	0.007109	12	0.081159	0.023184	12
	-905	0.046889	0.006922	12	0.080935	0.022891	12
	-903.75	0.045422	0.006809	12	0.080115	0.023037	12
	-902.5	0.045314	0.006752	12	0.079904	0.023136	12
	-901.25	0.045531	0.006774	12	0.079282	0.02273	12
	-900	0.045529	0.006524	12	0.078671	0.022581	12
	-898.75	0.046749	0.006369	12	0.076641	0.022325	12
	-897.5	0.047306	0.006679	12	0.076204	0.022356	12
	-896.25	0.046396	0.006429	12	0.075229	0.022228	12
	-895	0.045071	0.006446	12	0.074428	0.022343	12
	-893.75	0.044464	0.006338	12	0.074955	0.022439	12
	-892.5	0.045324	0.006509	12	0.076129	0.022603	12
	-891.25	0.045709	0.006713	12	0.067784	0.015236	12
	-890	0.045503	0.006954	12	0.069164	0.015922	12
	-888.75	0.046223	0.007618	12	0.064469	0.01314	12
	-887.5	0.046387	0.007698	12	0.065803	0.013479	12
	-886.25	0.046635	0.007789	12	0.066767	0.013771	12
	-885	0.046851	0.007986	12	0.066902	0.014088	12
	-883.75	0.047538	0.008399	12	0.066084	0.01386	12
	-882.5	0.047454	0.008486	12	0.0669	0.01471	12
	-881.25	0.04711	0.008449	12	0.065983	0.014545	12
	-880	0.046725	0.008391	12	0.065529	0.014516	12
	-878.75	0.046096	0.008449	12	0.067603	0.014624	12
	-877.5	0.045969	0.008158	12	0.068354	0.014591	12
	-876.25	0.045711	0.008012	12	0.071271	0.014694	12
	-875	0.045367	0.007876	12	0.072499	0.014718	12
	-873.75	0.045533	0.007745	12	0.07268	0.014673	12
	-872.5	0.043941	0.007582	12	0.071689	0.014425	12
	-871.25	0.043814	0.007611	12	0.070951	0.014243	12
	-870	0.043885	0.007433	12	0.067924	0.013408	12
	-868.75	0.043261	0.006662	12	0.064235	0.013155	12
	-867.5	0.043049	0.006595	12	0.062169	0.013096	12
	-866.25	0.044314	0.006923	12	0.063096	0.013655	12
	-865	0.044603	0.007072	12	0.064446	0.014227	12
	-863.75	0.044154	0.006958	12	0.066203	0.01527	12
	-862.5	0.044467	0.007111	12	0.065189	0.015768	12
	-861.25	0.04427	0.007173	12	0.067708	0.016821	12
	-860	0.044597	0.007391	12	0.068126	0.017125	12
	-858.75	0.044961	0.007708	12	0.067698	0.016996	12
	-857.5	0.045073	0.007873	12	0.067502	0.016801	12
	-856.25	0.046008	0.008193	12	0.066087	0.016001	12
	-855	0.046905	0.008284	12	0.065332	0.015785	12
	-853.75	0.046554	0.008244	12	0.065476	0.015941	12
	-852.5	0.046778	0.008274	12	0.064886	0.015769	12
	-851.25	0.04606	0.008107	12	0.063981	0.015751	12
	-850	0.045664	0.007981	12	0.0659	0.015562	12
	-848.75	0.04594	0.007997	12	0.065837	0.015576	12
	-847.5	0.045704	0.008043	12	0.065619	0.015798	12
	-846.25	0.04585	0.007928	12	0.064124	0.014701	12
	-845	0.045868	0.007697	12	0.062808	0.014178	12
	-843.75	0.046731	0.007719	12	0.062832	0.013948	12
	-842.5	0.046719	0.007633	12	0.063337	0.013687	12
	-841.25	0.047484	0.007908	12	0.062355	0.013008	12
	-840	0.04782	0.00818	12	0.063909	0.013809	12
	-838.75	0.04752	0.008111	12	0.064033	0.014099	12
	-837.5	0.047663	0.008039	12	0.063602	0.014155	12
	-836.25	0.04797	0.008201	12	0.06496	0.013694	12
	-835	0.047592	0.008344	12	0.064784	0.013619	12
	-833.75	0.047798	0.008352	12	0.064082	0.013492	12
	-832.5	0.047644	0.008259	12	0.065179	0.013911	12
	-831.25	0.047827	0.008312	12	0.066774	0.014144	12
	-830	0.048551	0.008533	12	0.066919	0.014818	12
	-828.75	0.048682	0.008451	12	0.067835	0.015353	12
	-827.5	0.049123	0.008491	12	0.06648	0.015495	12
	-826.25	0.047966	0.00844	12	0.06605	0.015905	12
	-825	0.047832	0.008614	12	0.064671	0.01584	12
	-823.75	0.046747	0.008625	12	0.06486	0.015252	12
	-822.5	0.046617	0.00874	12	0.06356	0.014662	12
	-821.25	0.048413	0.010036	12	0.062349	0.014141	12
	-820	0.048573	0.009704	12	0.060368	0.013442	12
	-818.75	0.048279	0.009478	12	0.059371	0.01261	12
	-817.5	0.047814	0.00942	12	0.059519	0.01246	12
	-816.25	0.046965	0.009019	12	0.058271	0.01301	12
	-815	0.046377	0.008787	12	0.057699	0.012835	12
	-813.75	0.046386	0.009007	12	0.057667	0.012714	12
	-812.5	0.047097	0.009592	12	0.056562	0.012337	12
	-811.25	0.046653	0.009593	12	0.056248	0.012188	12
	-810	0.04618	0.009413	12	0.056289	0.012483	12
	-808.75	0.046638	0.009658	12	0.056246	0.012094	12
	-807.5	0.046759	0.00956	12	0.057371	0.012587	12
	-806.25	0.046414	0.00941	12	0.057869	0.013665	12
	-805	0.0459	0.00916	12	0.057995	0.014085	12
	-803.75	0.045703	0.009042	12	0.05696	0.013557	12
	-802.5	0.046007	0.008901	12	0.056571	0.013544	12
	-801.25	0.04413	0.006993	12	0.056213	0.013416	12
	-800	0.043855	0.006953	12	0.055825	0.013147	12
	-798.75	0.043778	0.006871	12	0.055481	0.013092	12
	-797.5	0.043629	0.006668	12	0.055752	0.012841	12
	-796.25	0.045374	0.00674	12	0.055957	0.012547	12
	-795	0.057537	0.014075	12	0.055979	0.012533	12
	-793.75	0.058798	0.015314	12	0.056104	0.012508	12
	-792.5	0.058251	0.015262	12	0.057876	0.012464	12
	-791.25	0.058656	0.015261	12	0.057217	0.011994	12
	-790	0.059328	0.015209	12	0.055405	0.010878	12
	-788.75	0.058634	0.015139	12	0.05546	0.010983	12
	-787.5	0.05885	0.015182	12	0.055049	0.010266	12
	-786.25	0.059727	0.01524	12	0.053045	0.008992	12
	-785	0.059548	0.015328	12	0.052019	0.008246	12
	-783.75	0.059442	0.015429	12	0.052792	0.008487	12
	-782.5	0.058654	0.015649	12	0.053396	0.008937	12
	-781.25	0.058895	0.015644	12	0.054875	0.009776	12
	-780	0.058067	0.015717	12	0.056051	0.010507	12
	-778.75	0.057873	0.015717	12	0.057585	0.010968	12
	-777.5	0.058094	0.015712	12	0.057962	0.011252	12
	-776.25	0.058142	0.015725	12	0.058798	0.011292	12
	-775	0.048363	0.008516	12	0.061476	0.011112	12
	-773.75	0.045034	0.007083	12	0.063214	0.011491	12
	-772.5	0.044472	0.00679	12	0.064157	0.011852	12
	-771.25	0.045088	0.006883	12	0.064776	0.012102	12
	-770	0.045254	0.006905	12	0.066243	0.013132	12
	-768.75	0.045466	0.006869	12	0.068028	0.013925	12
	-767.5	0.046234	0.007128	12	0.068367	0.014077	12
	-766.25	0.045674	0.007196	12	0.069163	0.014263	12
	-765	0.04561	0.007166	12	0.06994	0.014523	12
	-763.75	0.04559	0.007029	12	0.069706	0.014538	12
	-762.5	0.045032	0.007231	12	0.068984	0.014184	12
	-761.25	0.043947	0.00731	12	0.068879	0.014321	12
	-760	0.043839	0.007233	12	0.071698	0.016275	12
	-758.75	0.043784	0.007115	12	0.076566	0.018344	12
	-757.5	0.043224	0.00691	12	0.078612	0.019573	12
	-756.25	0.042069	0.006219	12	0.078816	0.019936	12
	-755	0.043786	0.006925	12	0.078837	0.020031	12
	-753.75	0.045009	0.00787	12	0.078246	0.020083	12
	-752.5	0.045363	0.008282	12	0.077383	0.020377	12
	-751.25	0.044892	0.00826	12	0.077762	0.020698	12
	-750	0.044629	0.008105	12	0.076262	0.020513	12
	-748.75	0.045164	0.008005	12	0.076581	0.020247	12
	-747.5	0.044236	0.007336	12	0.07598	0.020136	12
	-746.25	0.043534	0.007068	12	0.076228	0.02038	12
	-745	0.043236	0.007039	12	0.076086	0.02046	12
	-743.75	0.04276	0.00719	12	0.076391	0.020544	12
	-742.5	0.04205	0.006966	12	0.076585	0.020409	12
	-741.25	0.041801	0.007125	12	0.076455	0.020382	12
	-740	0.041892	0.007215	12	0.072958	0.018787	12
	-738.75	0.041507	0.007377	12	0.068505	0.016339	12
	-737.5	0.04137	0.00756	12	0.068387	0.015608	12
	-736.25	0.0409	0.007542	12	0.069014	0.015439	12
	-735	0.039562	0.006917	12	0.068816	0.015647	12
	-733.75	0.038879	0.005865	12	0.068042	0.015475	12
	-732.5	0.040068	0.006619	12	0.067037	0.015494	12
	-731.25	0.041187	0.006694	12	0.065507	0.015145	12
	-730	0.040968	0.006847	12	0.064906	0.015119	12
	-728.75	0.039724	0.006901	12	0.062159	0.01524	12
	-727.5	0.041153	0.008204	12	0.063391	0.016002	12
	-726.25	0.041098	0.008269	12	0.062684	0.015815	12
	-725	0.041102	0.008259	12	0.062601	0.015797	12
	-723.75	0.041035	0.008182	12	0.061696	0.015706	12
	-722.5	0.041624	0.008249	12	0.061653	0.015961	12
	-721.25	0.041382	0.00822	12	0.060879	0.015769	12
	-720	0.041012	0.008175	12	0.060458	0.015672	12
	-718.75	0.04149	0.008277	12	0.059972	0.01549	12
	-717.5	0.042543	0.008638	12	0.058358	0.01452	12
	-716.25	0.043094	0.008785	12	0.05727	0.014086	12
	-715	0.043226	0.008739	12	0.056118	0.013634	12
	-713.75	0.042263	0.008614	12	0.056779	0.013928	12
	-712.5	0.040683	0.007602	12	0.056402	0.0139	12
	-711.25	0.039363	0.007265	12	0.057633	0.013762	12
	-710	0.039058	0.007043	12	0.059741	0.013688	12
	-708.75	0.039914	0.007463	12	0.060174	0.013694	12
	-707.5	0.037726	0.006722	12	0.058472	0.013018	12
	-706.25	0.038121	0.007118	12	0.059689	0.013232	12
	-705	0.0385	0.007312	12	0.060279	0.013362	12
	-703.75	0.03916	0.007499	12	0.06078	0.013292	12
	-702.5	0.03891	0.0074	12	0.061231	0.013273	12
	-701.25	0.038724	0.007357	12	0.061522	0.013203	12
	-700	0.039174	0.007443	12	0.063503	0.014024	12
	-698.75	0.038871	0.007246	12	0.064917	0.014632	12
	-697.5	0.038086	0.006943	12	0.065875	0.014908	12
	-696.25	0.037801	0.006809	12	0.067269	0.015367	12
	-695	0.037912	0.006783	12	0.068093	0.015588	12
	-693.75	0.037498	0.006811	12	0.068367	0.015767	12
	-692.5	0.03781	0.006888	12	0.068408	0.01586	12
	-691.25	0.038369	0.006926	12	0.068463	0.016138	12
	-690	0.039931	0.007665	12	0.067297	0.016158	12
	-688.75	0.041034	0.008429	12	0.066832	0.015951	12
	-687.5	0.040787	0.008362	12	0.067313	0.016002	12
	-686.25	0.040903	0.008184	12	0.06642	0.015785	12
	-685	0.041826	0.008364	12	0.067443	0.015784	12
	-683.75	0.042813	0.008667	12	0.067718	0.01632	12
	-682.5	0.043843	0.009081	12	0.067842	0.016698	12
	-681.25	0.044313	0.009312	12	0.069575	0.016844	12
	-680	0.044095	0.00935	12	0.06944	0.016108	12
	-678.75	0.044248	0.009377	12	0.070841	0.015746	12
	-677.5	0.044285	0.009141	12	0.070938	0.0159	12
	-676.25	0.044457	0.009032	12	0.070506	0.016184	12
	-675	0.044809	0.009041	12	0.071725	0.017382	12
	-673.75	0.045517	0.009116	12	0.071426	0.017878	12
	-672.5	0.045567	0.009239	12	0.071956	0.018003	12
	-671.25	0.045723	0.009189	12	0.071835	0.018172	12
	-670	0.04677	0.008613	12	0.072484	0.018899	12
	-668.75	0.044431	0.008134	12	0.073659	0.019751	12
	-667.5	0.04574	0.00805	12	0.074561	0.020508	12
	-666.25	0.046475	0.007894	12	0.075119	0.020868	12
	-665	0.045576	0.00755	12	0.074222	0.021679	12
	-663.75	0.044259	0.006785	12	0.074832	0.02191	12
	-662.5	0.043529	0.006289	12	0.075552	0.022223	12
	-661.25	0.043214	0.006002	12	0.075909	0.022207	12
	-660	0.042954	0.005858	12	0.077087	0.023148	12
	-658.75	0.042997	0.005839	12	0.075062	0.024213	12
	-657.5	0.043132	0.005944	12	0.074373	0.02462	12
	-656.25	0.043082	0.005936	12	0.07353	0.024376	12
	-655	0.04263	0.005814	12	0.073361	0.023823	12
	-653.75	0.041768	0.005648	12	0.073603	0.023626	12
	-652.5	0.041053	0.005402	12	0.073169	0.023285	12
	-651.25	0.040387	0.005254	12	0.073212	0.02331	12
	-650	0.038001	0.004987	12	0.07306	0.022863	12
	-648.75	0.037015	0.005053	12	0.072921	0.021917	12
	-647.5	0.03579	0.004737	12	0.071849	0.021036	12
	-646.25	0.034874	0.004724	12	0.071839	0.020506	12
	-645	0.034851	0.004772	12	0.072053	0.019925	12
	-643.75	0.035074	0.004772	12	0.071232	0.019207	12
	-642.5	0.034744	0.004785	12	0.071543	0.018729	12
	-641.25	0.034973	0.004953	12	0.071479	0.019095	12
	-640	0.03533	0.004927	12	0.070508	0.018633	12
	-638.75	0.03544	0.004898	12	0.070036	0.018151	12
	-637.5	0.037894	0.006331	12	0.070082	0.018082	12
	-636.25	0.038677	0.006681	12	0.070731	0.018273	12
	-635	0.03934	0.006939	12	0.069747	0.017572	12
	-633.75	0.043216	0.008343	12	0.068761	0.017247	12
	-632.5	0.043979	0.008483	12	0.069127	0.017705	12
	-631.25	0.044624	0.008753	12	0.070195	0.017965	12
	-630	0.044749	0.008844	12	0.070323	0.018185	12
	-628.75	0.045105	0.008972	12	0.07088	0.018883	12
	-627.5	0.045539	0.009079	12	0.072523	0.019059	12
	-626.25	0.045908	0.009474	12	0.074051	0.019484	12
	-625	0.046184	0.00963	12	0.073993	0.019667	12
	-623.75	0.046578	0.009972	12	0.074056	0.01962	12
	-622.5	0.047009	0.010243	12	0.072361	0.019153	12
	-621.25	0.047064	0.010292	12	0.07109	0.018228	12
	-620	0.047433	0.010549	12	0.069948	0.017406	12
	-618.75	0.048161	0.010847	12	0.069762	0.017347	12
	-617.5	0.047449	0.009855	12	0.068642	0.016265	12
	-616.25	0.047067	0.009656	12	0.06778	0.016034	12
	-615	0.047543	0.009527	12	0.067549	0.016225	12
	-613.75	0.044895	0.008324	12	0.068421	0.016024	12
	-612.5	0.044884	0.008278	12	0.068874	0.015994	12
	-611.25	0.04463	0.008008	12	0.067733	0.015753	12
	-610	0.044232	0.007816	12	0.067356	0.015326	12
	-608.75	0.043665	0.0076	12	0.065834	0.014515	12
	-607.5	0.043224	0.007678	12	0.06464	0.014477	12
	-606.25	0.043161	0.007615	12	0.064032	0.01423	12
	-605	0.04274	0.007475	12	0.063771	0.014625	12
	-603.75	0.042378	0.007092	12	0.063736	0.015172	12
	-602.5	0.042151	0.006915	12	0.063817	0.015305	12
	-601.25	0.042461	0.007154	12	0.06497	0.016052	12
	-600	0.042537	0.007383	12	0.064984	0.01642	12
	-598.75	0.042129	0.007442	12	0.065545	0.016107	12
	-597.5	0.041845	0.007496	12	0.066222	0.016451	12
	-596.25	0.041383	0.007585	12	0.066704	0.016593	12
	-595	0.039761	0.007591	12	0.066698	0.016879	12
	-593.75	0.039284	0.00781	12	0.066096	0.017148	12
	-592.5	0.039114	0.008035	12	0.065549	0.016902	12
	-591.25	0.039092	0.00814	12	0.06516	0.016782	12
	-590	0.039173	0.008181	12	0.064327	0.01687	12
	-588.75	0.039689	0.008204	12	0.06418	0.016905	12
	-587.5	0.039596	0.00801	12	0.064718	0.017143	12
	-586.25	0.038927	0.007519	12	0.064212	0.017293	12
	-585	0.039239	0.007329	12	0.06385	0.016796	12
	-583.75	0.039351	0.007278	12	0.063248	0.01648	12
	-582.5	0.039379	0.007112	12	0.065306	0.01677	12
	-581.25	0.038803	0.006685	12	0.064281	0.01624	12
	-580	0.038171	0.006045	12	0.064771	0.016155	12
	-578.75	0.037406	0.005531	12	0.06446	0.016204	12
	-577.5	0.036895	0.005339	12	0.066084	0.016316	12
	-576.25	0.03767	0.005354	12	0.069284	0.016006	12
	-575	0.038691	0.005199	12	0.075534	0.0166	12
	-573.75	0.03863	0.005073	12	0.075437	0.016647	12
	-572.5	0.037735	0.004835	12	0.074935	0.016776	12
	-571.25	0.037212	0.004614	12	0.076314	0.017062	12
	-570	0.037385	0.004629	12	0.077381	0.017484	12
	-568.75	0.036877	0.004554	12	0.077548	0.017549	12
	-567.5	0.03699	0.00464	12	0.076394	0.016949	12
	-566.25	0.037252	0.004665	12	0.076104	0.016621	12
	-565	0.03719	0.004754	12	0.076628	0.016897	12
	-563.75	0.036862	0.004802	12	0.079226	0.017155	12
	-562.5	0.036867	0.004862	12	0.078467	0.017474	12
	-561.25	0.036998	0.004911	12	0.080878	0.018172	12
	-560	0.036653	0.004856	12	0.081216	0.018703	12
	-558.75	0.036401	0.004846	12	0.081989	0.018482	12
	-557.5	0.036266	0.004818	12	0.082229	0.018133	12
	-556.25	0.035695	0.004727	12	0.081013	0.017555	12
	-555	0.034927	0.004649	12	0.075375	0.017149	12
	-553.75	0.034715	0.004741	12	0.075477	0.017271	12
	-552.5	0.034636	0.004824	12	0.077184	0.017844	12
	-551.25	0.035057	0.005097	12	0.077268	0.017843	12
	-550	0.034984	0.005034	12	0.076921	0.017719	12
	-548.75	0.035895	0.005204	12	0.076961	0.017741	12
	-547.5	0.036456	0.005482	12	0.077689	0.018574	12
	-546.25	0.036768	0.005786	12	0.077585	0.018607	12
	-545	0.037321	0.006182	12	0.077612	0.018641	12
	-543.75	0.037673	0.006433	12	0.075957	0.018923	12
	-542.5	0.037626	0.006403	12	0.076364	0.01904	12
	-541.25	0.037984	0.006525	12	0.074555	0.018739	12
	-540	0.039077	0.007037	12	0.073731	0.018033	12
	-538.75	0.039257	0.007221	12	0.073125	0.018027	12
	-537.5	0.039477	0.007275	12	0.071877	0.017716	12
	-536.25	0.039838	0.007171	12	0.071889	0.018041	12
	-535	0.039624	0.007193	12	0.07155	0.01787	12
	-533.75	0.039126	0.006947	12	0.070856	0.01774	12
	-532.5	0.039105	0.006809	12	0.069737	0.017406	12
	-531.25	0.038896	0.006573	12	0.069062	0.017375	12
	-530	0.03871	0.00652	12	0.06939	0.017466	12
	-528.75	0.037915	0.006297	12	0.07083	0.017562	12
	-527.5	0.037012	0.006016	12	0.071947	0.017171	12
	-526.25	0.036368	0.005684	12	0.072667	0.017234	12
	-525	0.036133	0.005596	12	0.072045	0.016923	12
	-523.75	0.035808	0.005515	12	0.071497	0.016472	12
	-522.5	0.035682	0.005454	12	0.070617	0.016126	12
	-521.25	0.035118	0.005177	12	0.071152	0.016209	12
	-520	0.033879	0.004603	12	0.07313	0.017335	12
	-518.75	0.034194	0.004462	12	0.0732	0.017455	12
	-517.5	0.034514	0.004421	12	0.073782	0.017684	12
	-516.25	0.03472	0.004502	12	0.074424	0.017461	12
	-515	0.035142	0.004716	12	0.073878	0.017307	12
	-513.75	0.035656	0.004837	12	0.073768	0.017184	12
	-512.5	0.036127	0.004947	12	0.07388	0.017515	12
	-511.25	0.036089	0.00496	12	0.07284	0.017479	12
	-510	0.036557	0.00513	12	0.071789	0.017061	12
	-508.75	0.036965	0.005272	12	0.069615	0.016613	12
	-507.5	0.037361	0.005432	12	0.06731	0.016644	12
	-506.25	0.03856	0.006061	12	0.067397	0.016889	12
	-505	0.038818	0.006018	12	0.066186	0.016619	12
	-503.75	0.0392	0.005898	12	0.065174	0.016568	12
	-502.5	0.038962	0.005896	12	0.064736	0.016601	12
	-501.25	0.039875	0.006097	12	0.063985	0.016011	12
	-500	0.040525	0.006527	12	0.061524	0.015022	12
	-498.75	0.04066	0.007088	12	0.061331	0.014531	12
	-497.5	0.040286	0.007135	12	0.06248	0.014494	12
	-496.25	0.040055	0.007001	12	0.061399	0.014235	12
	-495	0.040079	0.006984	12	0.061529	0.014361	12
	-493.75	0.039724	0.006984	12	0.061613	0.014529	12
	-492.5	0.039428	0.007001	12	0.06142	0.013955	12
	-491.25	0.039375	0.007068	12	0.061474	0.013824	12
	-490	0.039597	0.006951	12	0.061962	0.014124	12
	-488.75	0.039321	0.006867	12	0.061641	0.014132	12
	-487.5	0.039764	0.007129	12	0.061064	0.013734	12
	-486.25	0.039328	0.00695	12	0.057567	0.013697	12
	-485	0.038552	0.006672	12	0.057582	0.013585	12
	-483.75	0.038683	0.006636	12	0.058869	0.013377	12
	-482.5	0.039429	0.006726	12	0.061678	0.01325	12
	-481.25	0.03928	0.006676	12	0.062067	0.013371	12
	-480	0.03899	0.00634	12	0.062459	0.013333	12
	-478.75	0.038451	0.005821	12	0.062956	0.013796	12
	-477.5	0.038981	0.005839	12	0.062921	0.014078	12
	-476.25	0.039403	0.005936	12	0.063325	0.014362	12
	-475	0.041486	0.006783	12	0.063359	0.014333	12
	-473.75	0.043486	0.007553	12	0.063961	0.014356	12
	-472.5	0.043716	0.007589	12	0.063293	0.01403	12
	-471.25	0.044481	0.007926	12	0.063885	0.014157	12
	-470	0.045229	0.008473	12	0.06287	0.013886	12
	-468.75	0.045848	0.008764	12	0.063066	0.013916	12
	-467.5	0.046173	0.008904	12	0.063328	0.013936	12
	-466.25	0.046132	0.008801	12	0.063071	0.013738	12
	-465	0.04639	0.008799	12	0.06397	0.01408	12
	-463.75	0.045879	0.008853	12	0.06442	0.014783	12
	-462.5	0.045785	0.00925	12	0.061653	0.014714	12
	-461.25	0.045568	0.009404	12	0.06126	0.014531	12
	-460	0.045167	0.009509	12	0.061048	0.014478	12
	-458.75	0.045099	0.009947	12	0.060833	0.014148	12
	-457.5	0.044621	0.010067	12	0.05974	0.013306	12
	-456.25	0.044054	0.010143	12	0.058867	0.012863	12
	-455	0.04224	0.00958	12	0.072567	0.018937	12
	-453.75	0.039756	0.009348	12	0.072961	0.019864	12
	-452.5	0.039546	0.009367	12	0.074865	0.021238	12
	-451.25	0.039747	0.008833	12	0.074657	0.021366	12
	-450	0.039025	0.008202	12	0.075355	0.021713	12
	-448.75	0.038831	0.007934	12	0.076032	0.021816	12
	-447.5	0.037835	0.007304	12	0.077026	0.022134	12
	-446.25	0.037354	0.006929	12	0.077628	0.022414	12
	-445	0.037367	0.006947	12	0.076836	0.022468	12
	-443.75	0.037661	0.007039	12	0.076372	0.022337	12
	-442.5	0.036852	0.006644	12	0.076382	0.022459	12
	-441.25	0.036694	0.006997	12	0.076391	0.022503	12
	-440	0.037301	0.007358	12	0.078019	0.022464	12
	-438.75	0.037353	0.007173	12	0.078635	0.022352	12
	-437.5	0.037344	0.007125	12	0.07935	0.022452	12
	-436.25	0.037412	0.007009	12	0.079954	0.022506	12
	-435	0.037461	0.00702	12	0.069642	0.016881	12
	-433.75	0.03719	0.006878	12	0.067665	0.016196	12
	-432.5	0.036983	0.006876	12	0.063441	0.015951	12
	-431.25	0.037347	0.007824	12	0.062725	0.015836	12
	-430	0.036988	0.008101	12	0.062099	0.015827	12
	-428.75	0.037087	0.008487	12	0.062531	0.016222	12
	-427.5	0.037819	0.009301	12	0.062851	0.016058	12
	-426.25	0.037988	0.009768	12	0.062981	0.015692	12
	-425	0.038215	0.009967	12	0.062871	0.015449	12
	-423.75	0.03849	0.010592	12	0.062979	0.015125	12
	-422.5	0.038946	0.010998	12	0.06291	0.015057	12
	-421.25	0.038764	0.010627	12	0.062943	0.015117	12
	-420	0.038263	0.010397	12	0.061647	0.015065	12
	-418.75	0.037833	0.010157	12	0.060438	0.015343	12
	-417.5	0.038396	0.010009	12	0.060989	0.015673	12
	-416.25	0.03914	0.010371	12	0.060989	0.015759	12
	-415	0.039078	0.010415	12	0.060594	0.015908	12
	-413.75	0.039444	0.010969	12	0.060099	0.015728	12
	-412.5	0.039847	0.011222	12	0.059334	0.014867	12
	-411.25	0.03941	0.010858	12	0.058708	0.014206	12
	-410	0.039371	0.010874	12	0.057566	0.013613	12
	-408.75	0.039237	0.011402	12	0.05651	0.01285	12
	-407.5	0.038664	0.011036	12	0.05526	0.01213	12
	-406.25	0.038316	0.010655	12	0.054506	0.011814	12
	-405	0.038353	0.010467	12	0.05387	0.011463	12
	-403.75	0.037795	0.009734	12	0.053158	0.011502	12
	-402.5	0.038081	0.009969	12	0.053789	0.011652	12
	-401.25	0.038301	0.009969	12	0.054656	0.011549	12
	-400	0.038651	0.009915	12	0.054928	0.011397	12
	-398.75	0.0389	0.0101	12	0.054414	0.011231	12
	-397.5	0.039104	0.010428	12	0.053393	0.010509	12
	-396.25	0.039608	0.010284	12	0.05283	0.010119	12
	-395	0.040222	0.010278	12	0.052185	0.009719	12
	-393.75	0.040551	0.010046	12	0.052154	0.009891	12
	-392.5	0.040314	0.009793	12	0.053599	0.011054	12
	-391.25	0.03989	0.00952	12	0.056364	0.012537	12
	-390	0.039683	0.009267	12	0.057836	0.01354	12
	-388.75	0.038812	0.008382	12	0.059605	0.014362	12
	-387.5	0.039044	0.008113	12	0.060257	0.015067	12
	-386.25	0.039431	0.008107	12	0.061082	0.015725	12
	-385	0.039304	0.008118	12	0.062206	0.016108	12
	-383.75	0.039352	0.008186	12	0.062656	0.015729	12
	-382.5	0.038694	0.007563	12	0.063229	0.016119	12
	-381.25	0.038184	0.007502	12	0.063078	0.016193	12
	-380	0.037513	0.007392	12	0.067258	0.016124	12
	-378.75	0.037026	0.007117	12	0.067783	0.016169	12
	-377.5	0.03601	0.006542	12	0.068375	0.0169	12
	-376.25	0.034334	0.005912	12	0.070015	0.017704	12
	-375	0.033142	0.005578	12	0.072076	0.018312	12
	-373.75	0.031892	0.005051	12	0.073299	0.01886	12
	-372.5	0.031973	0.005155	12	0.072614	0.018579	12
	-371.25	0.032965	0.005457	12	0.07122	0.018109	12
	-370	0.033455	0.005789	12	0.07062	0.017883	12
	-368.75	0.034656	0.006639	12	0.070272	0.017015	12
	-367.5	0.034565	0.006972	12	0.070368	0.016874	12
	-366.25	0.034586	0.007292	12	0.071708	0.017165	12
	-365	0.034088	0.007752	12	0.0722	0.017919	12
	-363.75	0.034166	0.007915	12	0.072546	0.018813	12
	-362.5	0.034045	0.007923	12	0.072356	0.019134	12
	-361.25	0.034592	0.008132	12	0.072629	0.019444	12
	-360	0.034808	0.008222	12	0.06906	0.020376	12
	-358.75	0.034775	0.008225	12	0.069499	0.020741	12
	-357.5	0.03455	0.008365	12	0.07018	0.020714	12
	-356.25	0.034676	0.008446	12	0.069845	0.02021	12
	-355	0.03443	0.008493	12	0.069164	0.020046	12
	-353.75	0.034302	0.008514	12	0.06819	0.019935	12
	-352.5	0.033885	0.008238	12	0.067972	0.019766	12
	-351.25	0.033169	0.008054	12	0.067509	0.019377	12
	-350	0.03304	0.007921	12	0.06733	0.019033	12
	-348.75	0.031939	0.007114	12	0.066906	0.019001	12
	-347.5	0.031611	0.006823	12	0.066053	0.018721	12
	-346.25	0.031017	0.006431	12	0.064554	0.018246	12
	-345	0.030458	0.005909	12	0.063983	0.017637	12
	-343.75	0.030046	0.005578	12	0.063641	0.017201	12
	-342.5	0.029835	0.005438	12	0.062602	0.016526	12
	-341.25	0.02943	0.005322	12	0.063033	0.016045	12
	-340	0.029376	0.005367	12	0.06196	0.015366	12
	-338.75	0.029836	0.005626	12	0.062136	0.014892	12
	-337.5	0.030369	0.005961	12	0.061395	0.014672	12
	-336.25	0.030734	0.006251	12	0.060975	0.01449	12
	-335	0.032188	0.00723	12	0.060146	0.014011	12
	-333.75	0.033431	0.00826	12	0.05885	0.013527	12
	-332.5	0.034188	0.00887	12	0.058488	0.013295	12
	-331.25	0.034063	0.008887	12	0.059504	0.013512	12
	-330	0.034182	0.008782	12	0.05954	0.013502	12
	-328.75	0.034299	0.008773	12	0.059771	0.01368	12
	-327.5	0.03437	0.008681	12	0.060172	0.014069	12
	-326.25	0.034995	0.008758	12	0.060927	0.014419	12
	-325	0.035253	0.0088	12	0.060571	0.014149	12
	-323.75	0.035556	0.00891	12	0.059685	0.013709	12
	-322.5	0.035541	0.008837	12	0.060048	0.013318	12
	-321.25	0.035051	0.00876	12	0.058571	0.013297	12
	-320	0.03481	0.008874	12	0.059434	0.013337	12
	-318.75	0.035368	0.009611	12	0.059717	0.013072	12
	-317.5	0.035437	0.009889	12	0.059089	0.012825	12
	-316.25	0.036455	0.010287	12	0.059313	0.013263	12
	-315	0.03615	0.009921	12	0.060305	0.013294	12
	-313.75	0.035488	0.009313	12	0.060638	0.013384	12
	-312.5	0.035233	0.009293	12	0.061285	0.013681	12
	-311.25	0.036169	0.010163	12	0.060778	0.013985	12
	-310	0.036964	0.010442	12	0.061665	0.015054	12
	-308.75	0.037091	0.010639	12	0.061353	0.015292	12
	-307.5	0.037013	0.01065	12	0.061386	0.015396	12
	-306.25	0.036577	0.01056	12	0.061488	0.015635	12
	-305	0.036396	0.010523	12	0.063244	0.016589	12
	-303.75	0.035613	0.010414	12	0.064477	0.017266	12
	-302.5	0.03519	0.010323	12	0.066034	0.017967	12
	-301.25	0.035281	0.01025	12	0.067675	0.018169	12
	-300	0.035327	0.010078	12	0.067885	0.018125	12
	-298.75	0.034392	0.009244	12	0.066637	0.018502	12
	-297.5	0.033812	0.008698	12	0.06597	0.018192	12
	-296.25	0.03222	0.007891	12	0.065	0.017783	12
	-295	0.031173	0.007355	12	0.064814	0.017967	12
	-293.75	0.030697	0.006991	12	0.064857	0.018249	12
	-292.5	0.029747	0.006373	12	0.064337	0.018457	12
	-291.25	0.02768	0.005076	12	0.064429	0.018569	12
	-290	0.026009	0.004702	12	0.063815	0.01812	12
	-288.75	0.025421	0.004392	12	0.063374	0.018049	12
	-287.5	0.025196	0.004266	12	0.062549	0.017613	12
	-286.25	0.025001	0.004222	12	0.061163	0.016862	12
	-285	0.024857	0.004172	12	0.060274	0.015553	12
	-283.75	0.024825	0.004212	12	0.059546	0.014848	12
	-282.5	0.024976	0.004331	12	0.057547	0.013927	12
	-281.25	0.025136	0.004402	12	0.055954	0.013454	12
	-280	0.025011	0.004419	12	0.054984	0.012984	12
	-278.75	0.024807	0.004344	12	0.055951	0.012716	12
	-277.5	0.024864	0.004339	12	0.057943	0.013177	12
	-276.25	0.025215	0.004433	12	0.059776	0.01359	12
	-275	0.025649	0.004581	12	0.060491	0.013211	12
	-273.75	0.02579	0.004676	12	0.060888	0.013812	12
	-272.5	0.026099	0.004787	12	0.061709	0.01381	12
	-271.25	0.02631	0.004803	12	0.061546	0.013427	12
	-270	0.026077	0.004769	12	0.061337	0.013499	12
	-268.75	0.025792	0.004845	12	0.06347	0.014654	12
	-267.5	0.02592	0.004886	12	0.066241	0.015647	12
	-266.25	0.026055	0.004925	12	0.066464	0.015894	12
	-265	0.026497	0.005176	12	0.06577	0.016075	12
	-263.75	0.026535	0.00519	12	0.064974	0.015999	12
	-262.5	0.026613	0.005204	12	0.066116	0.016557	12
	-261.25	0.026599	0.005023	12	0.0662	0.0165	12
	-260	0.026579	0.004977	12	0.065648	0.016282	12
	-258.75	0.026734	0.005024	12	0.06485	0.016839	12
	-257.5	0.028902	0.005929	12	0.064761	0.016935	12
	-256.25	0.028913	0.005917	12	0.063431	0.016906	12
	-255	0.029005	0.005967	12	0.06248	0.017111	12
	-253.75	0.028831	0.005913	12	0.065432	0.017172	12
	-252.5	0.028638	0.005892	12	0.066172	0.017821	12
	-251.25	0.028723	0.006013	12	0.075319	0.024689	12
	-250	0.028947	0.006254	12	0.077827	0.026454	12
	-248.75	0.028844	0.006257	12	0.077727	0.026087	12
	-247.5	0.028546	0.006187	12	0.0761	0.02584	12
	-246.25	0.028592	0.006136	12	0.076567	0.025976	12
	-245	0.028241	0.005952	12	0.077497	0.026133	12
	-243.75	0.028735	0.005885	12	0.077717	0.026103	12
	-242.5	0.028521	0.00581	12	0.076259	0.025592	12
	-241.25	0.028235	0.005877	12	0.075388	0.025477	12
	-240	0.028432	0.005938	12	0.07499	0.025622	12
	-238.75	0.028466	0.005878	12	0.073967	0.025137	12
	-237.5	0.026341	0.004855	12	0.072854	0.024707	12
	-236.25	0.026088	0.004789	12	0.072554	0.024355	12
	-235	0.025903	0.004647	12	0.072273	0.023994	12
	-233.75	0.025948	0.004631	12	0.067792	0.023469	12
	-232.5	0.026125	0.004635	12	0.066316	0.022503	12
	-231.25	0.025573	0.004462	12	0.055516	0.014654	12
	-230	0.024952	0.004209	12	0.050752	0.012331	12
	-228.75	0.025304	0.004104	12	0.051215	0.012526	12
	-227.5	0.02562	0.004228	12	0.05141	0.012519	12
	-226.25	0.02803	0.005796	12	0.050793	0.012469	12
	-225	0.028685	0.006322	12	0.050532	0.013045	12
	-223.75	0.028733	0.006421	12	0.052071	0.01411	12
	-222.5	0.029139	0.006459	12	0.0539	0.015056	12
	-221.25	0.029621	0.006495	12	0.055469	0.015788	12
	-220	0.029495	0.006462	12	0.057469	0.016513	12
	-218.75	0.029412	0.006433	12	0.060545	0.01758	12
	-217.5	0.029643	0.006459	12	0.061259	0.017993	12
	-216.25	0.029777	0.006485	12	0.061494	0.018553	12
	-215	0.029856	0.006477	12	0.061657	0.019336	12
	-213.75	0.029872	0.006429	12	0.062177	0.019886	12
	-212.5	0.02987	0.006373	12	0.06444	0.019984	12
	-211.25	0.029976	0.006402	12	0.064324	0.02	12
	-210	0.030108	0.006602	12	0.064597	0.020151	12
	-208.75	0.030052	0.006788	12	0.064436	0.019515	12
	-207.5	0.030033	0.006699	12	0.064903	0.019136	12
	-206.25	0.028566	0.005642	12	0.065077	0.018891	12
	-205	0.028473	0.005563	12	0.066384	0.018328	12
	-203.75	0.028981	0.00588	12	0.066392	0.017734	12
	-202.5	0.028875	0.005997	12	0.065616	0.017293	12
	-201.25	0.028565	0.006036	12	0.065	0.016963	12
	-200	0.028487	0.00601	12	0.063357	0.016258	12
	-198.75	0.028552	0.006043	12	0.060706	0.015236	12
	-197.5	0.028197	0.00603	12	0.060185	0.015035	12
	-196.25	0.027935	0.005997	12	0.059592	0.014822	12
	-195	0.027943	0.006067	12	0.058273	0.014829	12
	-193.75	0.028408	0.006367	12	0.058626	0.014719	12
	-192.5	0.028338	0.006428	12	0.057718	0.014916	12
	-191.25	0.028183	0.0064	12	0.058933	0.01511	12
	-190	0.027808	0.006236	12	0.058212	0.014042	12
	-188.75	0.027494	0.006089	12	0.058201	0.013345	12
	-187.5	0.027429	0.006078	12	0.057786	0.012999	12
	-186.25	0.02691	0.005774	12	0.060838	0.013609	12
	-185	0.026124	0.005286	12	0.060309	0.014351	12
	-183.75	0.024972	0.004749	12	0.059109	0.014546	12
	-182.5	0.024979	0.004723	12	0.060004	0.014132	12
	-181.25	0.024773	0.004662	12	0.059469	0.013735	12
	-180	0.025214	0.004733	12	0.059435	0.013575	12
	-178.75	0.025973	0.004522	12	0.059157	0.013452	12
	-177.5	0.026248	0.004372	12	0.058735	0.01306	12
	-176.25	0.026511	0.004328	12	0.059061	0.012869	12
	-175	0.026975	0.004157	12	0.059964	0.012329	12
	-173.75	0.02653	0.003952	12	0.059446	0.01173	12
	-172.5	0.026344	0.003914	12	0.059069	0.011172	12
	-171.25	0.026363	0.003934	12	0.058374	0.010539	12
	-170	0.026732	0.004111	12	0.05788	0.010524	12
	-168.75	0.026899	0.004262	12	0.057458	0.01079	12
	-167.5	0.027176	0.00442	12	0.060601	0.011862	12
	-166.25	0.027116	0.004517	12	0.059149	0.011557	12
	-165	0.027145	0.004581	12	0.057589	0.010838	12
	-163.75	0.027262	0.004648	12	0.05849	0.011127	12
	-162.5	0.026944	0.004528	12	0.057732	0.01154	12
	-161.25	0.026826	0.004508	12	0.057236	0.011919	12
	-160	0.026394	0.00449	12	0.057935	0.012146	12
	-158.75	0.026179	0.004483	12	0.058657	0.01225	12
	-157.5	0.026173	0.004501	12	0.059831	0.012291	12
	-156.25	0.026206	0.004556	12	0.059976	0.012719	12
	-155	0.025662	0.004504	12	0.059852	0.012631	12
	-153.75	0.025364	0.004394	12	0.059887	0.012668	12
	-152.5	0.026156	0.004782	12	0.060086	0.013026	12
	-151.25	0.026146	0.004838	12	0.059188	0.013137	12
	-150	0.025883	0.004712	12	0.059994	0.013322	12
	-148.75	0.025566	0.004639	12	0.060112	0.01345	12
	-147.5	0.024989	0.004578	12	0.056527	0.012655	12
	-146.25	0.024828	0.004485	12	0.056096	0.012389	12
	-145	0.02464	0.00444	12	0.057104	0.01276	12
	-143.75	0.024639	0.004445	12	0.058376	0.012542	12
	-142.5	0.024728	0.004466	12	0.059449	0.012713	12
	-141.25	0.025063	0.004548	12	0.060069	0.012951	12
	-140	0.025031	0.004471	12	0.060883	0.013002	12
	-138.75	0.024937	0.004408	12	0.061221	0.013298	12
	-137.5	0.024714	0.004425	12	0.061187	0.013366	12
	-136.25	0.024683	0.004414	12	0.060585	0.013043	12
	-135	0.024769	0.004496	12	0.061365	0.013481	12
	-133.75	0.025028	0.004542	12	0.061344	0.013723	12
	-132.5	0.024465	0.004216	12	0.061319	0.013484	12
	-131.25	0.024409	0.004204	12	0.061402	0.013431	12
	-130	0.024315	0.004174	12	0.060607	0.013397	12
	-128.75	0.024361	0.004167	12	0.060523	0.013226	12
	-127.5	0.024482	0.004254	12	0.063992	0.014667	12
	-126.25	0.024653	0.004352	12	0.063878	0.01454	12
	-125	0.024738	0.004364	12	0.063701	0.014351	12
	-123.75	0.024702	0.004357	12	0.062265	0.014651	12
	-122.5	0.024831	0.004464	12	0.061268	0.014351	12
	-121.25	0.024781	0.004526	12	0.061895	0.014533	12
	-120	0.024918	0.004636	12	0.061687	0.014985	12
	-118.75	0.024818	0.004653	12	0.061652	0.014772	12
	-117.5	0.02493	0.004648	12	0.063303	0.014822	12
	-116.25	0.024821	0.004633	12	0.065774	0.014875	12
	-115	0.025072	0.004644	12	0.065318	0.014797	12
	-113.75	0.02596	0.005022	12	0.064981	0.01458	12
	-112.5	0.026091	0.005035	12	0.064766	0.014919	12
	-111.25	0.026091	0.004976	12	0.067016	0.015922	12
	-110	0.026094	0.005011	12	0.073419	0.020817	12
	-108.75	0.025947	0.00499	12	0.074422	0.021502	12
	-107.5	0.026015	0.004931	12	0.072962	0.020398	12
	-106.25	0.02643	0.005043	12	0.073712	0.02052	12
	-105	0.026664	0.005098	12	0.073779	0.020274	12
	-103.75	0.027126	0.005243	12	0.074296	0.019686	12
	-102.5	0.027147	0.005219	12	0.076654	0.019908	12
	-101.25	0.027131	0.005172	12	0.077544	0.020139	12
	-100	0.026942	0.005047	12	0.077774	0.019872	12
	-98.75	0.027092	0.004959	12	0.077831	0.020299	12
	-97.5	0.027305	0.004837	12	0.076909	0.020701	12
	-96.25	0.027276	0.004779	12	0.074808	0.021147	12
	-95	0.027379	0.004533	12	0.074612	0.021489	12
	-93.75	0.0265	0.004128	12	0.074462	0.021793	12
	-92.5	0.026123	0.004	12	0.073227	0.021728	12
	-91.25	0.026099	0.003975	12	0.071395	0.020811	12
	-90	0.026388	0.003995	12	0.064027	0.015811	12
	-88.75	0.026544	0.003998	12	0.062162	0.014974	12
	-87.5	0.0264	0.003963	12	0.061923	0.014827	12
	-86.25	0.025888	0.003818	12	0.062184	0.014678	12
	-85	0.026144	0.003762	12	0.062923	0.01507	12
	-83.75	0.026021	0.003577	12	0.063015	0.01538	12
	-82.5	0.025861	0.003526	12	0.061577	0.0153	12
	-81.25	0.025876	0.003535	12	0.060897	0.01522	12
	-80	0.025902	0.003558	12	0.059852	0.015094	12
	-78.75	0.026011	0.00358	12	0.058455	0.014743	12
	-77.5	0.026221	0.003642	12	0.062192	0.015057	12
	-76.25	0.026203	0.003647	12	0.062431	0.014717	12
	-75	0.026373	0.003712	12	0.06162	0.01407	12
	-73.75	0.026242	0.003759	12	0.061688	0.013627	12
	-72.5	0.026454	0.003799	12	0.062183	0.013712	12
	-71.25	0.026538	0.003852	12	0.062882	0.01422	12
	-70	0.026163	0.003837	12	0.064057	0.014535	12
	-68.75	0.026116	0.003911	12	0.064492	0.014615	12
	-67.5	0.026431	0.003901	12	0.06462	0.014888	12
	-66.25	0.026903	0.004003	12	0.062921	0.014621	12
	-65	0.026722	0.004028	12	0.061937	0.014227	12
	-63.75	0.026594	0.003954	12	0.061056	0.013967	12
	-62.5	0.026551	0.00392	12	0.059836	0.013291	12
	-61.25	0.026571	0.003866	12	0.057488	0.012456	12
	-60	0.026722	0.003927	12	0.056494	0.012171	12
	-58.75	0.026592	0.003938	12	0.055836	0.011989	12
	-57.5	0.026236	0.003955	12	0.050158	0.010421	12
	-56.25	0.026489	0.004071	12	0.048154	0.010122	12
	-55	0.026451	0.003979	12	0.047162	0.009988	12
	-53.75	0.026237	0.003975	12	0.048507	0.010774	12
	-52.5	0.026203	0.003955	12	0.048505	0.010437	12
	-51.25	0.026474	0.004016	12	0.048693	0.010187	12
	-50	0.026594	0.004042	12	0.047605	0.010104	12
	-48.75	0.026519	0.003966	12	0.047347	0.010501	12
	-47.5	0.02627	0.003948	12	0.047675	0.010712	12
	-46.25	0.02576	0.0038	12	0.048456	0.011021	12
	-45	0.025959	0.003833	12	0.047601	0.010673	12
	-43.75	0.02589	0.003879	12	0.046819	0.010633	12
	-42.5	0.025802	0.003944	12	0.05028	0.010962	12
	-41.25	0.026797	0.004669	12	0.052128	0.01165	12
	-40	0.026882	0.004864	12	0.055332	0.013088	12
	-38.75	0.027795	0.005227	12	0.057842	0.014045	12
	-37.5	0.028259	0.005302	12	0.059111	0.014431	12
	-36.25	0.028447	0.005315	12	0.059684	0.01478	12
	-35	0.028528	0.005313	12	0.060469	0.015063	12
	-33.75	0.028713	0.00531	12	0.059227	0.014648	12
	-32.5	0.028849	0.0053	12	0.05908	0.014752	12
	-31.25	0.028498	0.005243	12	0.058981	0.014889	12
	-30	0.028382	0.005246	12	0.059453	0.015362	12
	-28.75	0.02858	0.005352	12	0.059812	0.015484	12
	-27.5	0.028866	0.005427	12	0.060134	0.015501	12
	-26.25	0.028822	0.005449	12	0.059356	0.015284	12
	-25	0.028558	0.005485	12	0.059642	0.015389	12
	-23.75	0.02849	0.005526	12	0.061564	0.015625	12
	-22.5	0.028764	0.005465	12	0.06202	0.015302	12
	-21.25	0.027744	0.004942	12	0.062903	0.015493	12
	-20	0.027659	0.004903	12	0.062631	0.01527	12
	-18.75	0.026747	0.004691	12	0.062759	0.015388	12
	-17.5	0.02729	0.004924	12	0.063573	0.016145	12
	-16.25	0.028156	0.00516	12	0.065252	0.016849	12
	-15	0.029361	0.005165	12	0.065628	0.01706	12
	-13.75	0.030089	0.005156	12	0.066505	0.017356	12
	-12.5	0.030206	0.00521	12	0.067653	0.017678	12
	-11.25	0.030676	0.005341	12	0.066995	0.01795	12
	-10	0.030718	0.005359	12	0.065866	0.017697	12
	-8.75	0.030817	0.005338	12	0.065414	0.017872	12
	-7.5	0.030884	0.005385	12	0.064297	0.017812	12
	-6.25	0.031496	0.005511	12	0.063866	0.017886	12
	-5	0.031874	0.00554	12	0.064052	0.018039	12
	-3.75	0.0323	0.005624	12	0.063587	0.017606	12
	-2.5	0.03314	0.005922	12	0.062992	0.01744	12
	-1.25	0.03392	0.006214	12	0.062629	0.017395	12
	0	0.035103	0.006771	12	0.061591	0.016975	12
	1.25	0.035595	0.007055	12	0.060372	0.016553	12
	2.5	0.035179	0.006776	12	0.058564	0.015773	12
	3.75	0.034488	0.006626	12	0.05611	0.014968	12
	5	0.03372	0.006509	12	0.056271	0.015538	12
	6.25	0.033282	0.006408	12	0.055664	0.015467	12
	7.5	0.033453	0.006291	12	0.054855	0.015839	12
	8.75	0.033676	0.006157	12	0.055138	0.0165	12
	10	0.034642	0.006131	12	0.056194	0.017002	12
	11.25	0.035	0.006089	12	0.05631	0.017025	12
	12.5	0.034789	0.006013	12	0.056883	0.017176	12
	13.75	0.034476	0.005864	12	0.059743	0.017453	12
	15	0.034486	0.005749	12	0.060349	0.017691	12
	16.25	0.034118	0.005769	12	0.061523	0.018205	12
	17.5	0.033564	0.00557	12	0.062598	0.017961	12
	18.75	0.032853	0.005191	12	0.061374	0.017456	12
	20	0.032323	0.004754	12	0.060834	0.017061	12
	21.25	0.03235	0.004802	12	0.062227	0.016223	12
	22.5	0.033412	0.00532	12	0.073005	0.019106	12
	23.75	0.03398	0.005584	12	0.086315	0.02832	12
	25	0.035006	0.006108	12	0.089112	0.030061	12
	26.25	0.040521	0.009526	12	0.090629	0.030306	12
	27.5	0.045847	0.014284	12	0.09144	0.030304	12
	28.75	0.046897	0.015268	12	0.092787	0.030437	12
	30	0.047028	0.015719	12	0.093634	0.030665	12
	31.25	0.04671	0.015869	12	0.094549	0.030822	12
	32.5	0.047124	0.015939	12	0.096231	0.030919	12
	33.75	0.046954	0.015967	12	0.096295	0.031242	12
	35	0.046314	0.016004	12	0.098213	0.03152	12
	36.25	0.046896	0.016874	12	0.099388	0.031659	12
	37.5	0.048016	0.018727	12	0.100309	0.03193	12
	38.75	0.049746	0.020281	12	0.102291	0.032261	12
	40	0.049841	0.021204	12	0.103802	0.032571	12
	41.25	0.050167	0.021587	12	0.10515	0.032608	12
	42.5	0.050633	0.021838	12	0.102639	0.030339	12
	43.75	0.052235	0.021927	12	0.091893	0.022672	12
	45	0.052882	0.022086	12	0.088415	0.020615	12
	46.25	0.056204	0.0217	12	0.08949	0.021164	12
	47.5	0.056411	0.020348	12	0.090317	0.021555	12
	48.75	0.124955	0.080091	12	0.09107	0.021785	12
	50	0.152546	0.107125	12	0.09383	0.022266	12
	51.25	0.160735	0.115267	12	0.095166	0.022694	12
	52.5	0.195875	0.145449	12	0.095018	0.022792	12
	53.75	0.214379	0.163118	12	0.095635	0.022824	12
	55	0.222374	0.1703	12	0.099541	0.024574	12
	56.25	0.233638	0.181186	12	0.108133	0.028461	12
	57.5	0.235484	0.182949	12	0.112709	0.030032	12
	58.75	0.25869	0.184279	12	0.119104	0.032328	12
	60	0.263053	0.1857	12	0.131247	0.032276	12
	61.25	0.266394	0.188584	12	0.167592	0.038588	12
	62.5	0.270583	0.192736	12	0.221774	0.065301	12
	63.75	0.275138	0.196388	12	0.268616	0.092653	12
	65	0.276989	0.197202	12	0.303433	0.111912	12
	66.25	0.29808	0.197667	12	0.339547	0.131621	12
	67.5	0.309808	0.19957	12	0.355353	0.14544	12
	68.75	0.296977	0.18349	12	0.373084	0.161866	12
	70	0.294364	0.169174	12	0.388854	0.174464	12
	71.25	0.312793	0.164494	12	0.404955	0.186772	12
	72.5	0.288327	0.143855	12	0.42645	0.197763	12
	73.75	0.275393	0.127483	12	0.441485	0.208006	12
	75	0.329892	0.132895	12	0.459003	0.216855	12
	76.25	0.39878	0.134135	12	0.470349	0.224476	12
	77.5	0.433904	0.147395	12	0.477787	0.232315	12
	78.75	0.44941	0.158431	12	0.482323	0.241244	12
	80	0.462317	0.165013	12	0.492729	0.249635	12
	81.25	0.467306	0.167131	12	0.509521	0.254958	12
	82.5	0.470955	0.165476	12	0.529149	0.25573	12
	83.75	0.475553	0.163854	12	0.546011	0.251449	12
	85	0.485647	0.163214	12	0.533727	0.247319	12
	86.25	0.490443	0.164049	12	0.515521	0.240827	12
	87.5	0.484273	0.164569	12	0.529926	0.239234	12
	88.75	0.486559	0.166513	12	0.531912	0.235959	12
	90	0.505815	0.168972	12	0.523935	0.230107	12
	91.25	0.524887	0.176119	12	0.511266	0.220759	12
	92.5	0.544498	0.180013	12	0.499117	0.212607	12
	93.75	0.556867	0.181139	12	0.503571	0.206327	12
	95	0.547706	0.168449	12	0.503825	0.200767	12
	96.25	0.547221	0.149989	12	0.478482	0.1953	12
	97.5	0.537279	0.138212	12	0.455964	0.188835	12
	98.75	0.514534	0.128536	12	0.443391	0.178261	12
	100	0.492546	0.123323	12	0.429764	0.166688	12
	101.25	0.481155	0.12088	12	0.411343	0.153752	12
	102.5	0.490445	0.123511	12	0.390369	0.139262	12
	103.75	0.487173	0.12328	12	0.371852	0.138339	12
	105	0.473866	0.127298	12	0.36271	0.134102	12
	106.25	0.459534	0.137962	12	0.351142	0.129224	12
	107.5	0.454214	0.147939	12	0.318843	0.114924	12
	108.75	0.443197	0.157376	12	0.277534	0.102626	12
	110	0.432188	0.15203	12	0.241262	0.101551	12
	111.25	0.40216	0.141427	12	0.236649	0.101341	12
	112.5	0.385479	0.135967	12	0.253877	0.095818	12
	113.75	0.377734	0.133454	12	0.233331	0.083231	12
	115	0.378663	0.134995	12	0.208399	0.069037	12
	116.25	0.353038	0.13375	12	0.204432	0.068004	12
	117.5	0.330132	0.129078	12	0.203118	0.068289	12
	118.75	0.31987	0.126223	12	0.201014	0.068627	12
	120	0.329092	0.122845	12	0.198648	0.067597	12
	121.25	0.327327	0.120816	12	0.201181	0.068074	12
	122.5	0.313302	0.112278	12	0.195342	0.06399	12
	123.75	0.31024	0.111747	12	0.139175	0.038435	12
	125	0.319842	0.115657	12	0.118071	0.034835	12
	126.25	0.299537	0.105493	12	0.115213	0.034847	12
	127.5	0.276338	0.094183	12	0.113234	0.03485	12
	128.75	0.245864	0.085323	12	0.117505	0.039507	12
	130	0.238483	0.083728	12	0.121377	0.043747	12
	131.25	0.23237	0.083172	12	0.120055	0.043703	12
	132.5	0.206222	0.077918	12	0.109223	0.034683	12
	133.75	0.177581	0.074899	12	0.108463	0.034657	12
	135	0.146803	0.065452	12	0.107809	0.034577	12
	136.25	0.119646	0.060726	12	0.106042	0.034583	12
	137.5	0.116326	0.059958	12	0.103966	0.034448	12
	138.75	0.114643	0.059133	12	0.103767	0.034442	12
	140	0.105816	0.057625	12	0.100526	0.034491	12
	141.25	0.100172	0.056926	12	0.094786	0.031683	12
	142.5	0.09538	0.055644	12	0.082801	0.027109	12
	143.75	0.08763	0.048285	12	0.07967	0.02696	12
	145	0.05695	0.018482	12	0.079285	0.027031	12
	146.25	0.047911	0.010739	12	0.079539	0.027161	12
	147.5	0.045173	0.008647	12	0.079389	0.02714	12
	148.75	0.039221	0.005336	12	0.070569	0.019491	12
	150	0.036364	0.004855	12	0.055348	0.009306	12
	151.25	0.034997	0.004618	12	0.054435	0.009018	12
	152.5	0.03434	0.004412	12	0.053437	0.008731	12
	153.75	0.034124	0.004428	12	0.05258	0.008439	12
	155	0.051136	0.019251	12	0.051762	0.008242	12
	156.25	0.053615	0.021407	12	0.05112	0.008031	12
	157.5	0.053816	0.021687	12	0.050529	0.007996	12
	158.75	0.053618	0.021711	12	0.048578	0.007632	12
	160	0.053929	0.021714	12	0.047646	0.00729	12
	161.25	0.0539	0.021743	12	0.047204	0.007257	12
	162.5	0.05388	0.021773	12	0.046431	0.007091	12
	163.75	0.053742	0.021809	12	0.045769	0.007062	12
	165	0.053446	0.021837	12	0.044953	0.007113	12
	166.25	0.053387	0.021858	12	0.043217	0.006852	12
	167.5	0.053113	0.021902	12	0.042598	0.006875	12
	168.75	0.053054	0.021938	12	0.04198	0.006715	12
	170	0.052957	0.021984	12	0.041124	0.006626	12
	171.25	0.052699	0.021992	12	0.040367	0.006477	12
	172.5	0.052556	0.021998	12	0.040065	0.006495	12
	173.75	0.052129	0.021981	12	0.039582	0.006288	12
	175	0.039157	0.010098	12	0.03956	0.006223	12
	176.25	0.032719	0.005566	12	0.039052	0.006103	12
	177.5	0.030985	0.004974	12	0.038222	0.005818	12
	178.75	0.030664	0.004897	12	0.038293	0.005885	12
	180	0.029882	0.004714	12	0.038218	0.005796	12
	181.25	0.029526	0.004593	12	0.037464	0.005565	12
	182.5	0.029184	0.004502	12	0.037289	0.005472	12
	183.75	0.029427	0.004472	12	0.037057	0.005437	12
	185	0.029371	0.004484	12	0.036616	0.005256	12
	186.25	0.028994	0.004484	12	0.036301	0.005084	12
	187.5	0.028553	0.004462	12	0.035525	0.004832	12
	188.75	0.028152	0.004391	12	0.035347	0.004802	12
	190	0.027696	0.004338	12	0.035104	0.004758	12
	191.25	0.027399	0.004351	12	0.034919	0.004773	12
	192.5	0.02697	0.00432	12	0.034612	0.004755	12
	193.75	0.026748	0.004302	12	0.034266	0.004676	12
	195	0.02666	0.004297	12	0.033493	0.004457	12
	196.25	0.026601	0.004297	12	0.033332	0.0044	12
	197.5	0.026327	0.004242	12	0.032931	0.004366	12
	198.75	0.026329	0.004296	12	0.032442	0.004283	12
	200	0.026105	0.004326	12	0.031871	0.004247	12
	201.25	0.025885	0.004358	12	0.031933	0.004239	12
	202.5	0.025449	0.004389	12	0.031432	0.004253	12
	203.75	0.02481	0.004371	12	0.031174	0.004224	12
	205	0.024641	0.004392	12	0.031343	0.004498	12
	206.25	0.024467	0.004419	12	0.031841	0.004766	12
	207.5	0.024315	0.004401	12	0.031926	0.004789	12
	208.75	0.02411	0.004337	12	0.031713	0.004791	12
	210	0.023944	0.004283	12	0.03161	0.004825	12
	211.25	0.024166	0.004324	12	0.03119	0.004721	12
	212.5	0.02452	0.00435	12	0.031252	0.00473	12
	213.75	0.024855	0.004438	12	0.031319	0.004765	12
	215	0.025125	0.004493	12	0.031234	0.004782	12
	216.25	0.025038	0.004427	12	0.031045	0.004826	12
	217.5	0.02497	0.004429	12	0.031388	0.004913	12
	218.75	0.024962	0.004439	12	0.031781	0.005085	12
	220	0.024937	0.004468	12	0.032444	0.005369	12
	221.25	0.024936	0.004468	12	0.03272	0.005496	12
	222.5	0.025041	0.004515	12	0.032655	0.005547	12
	223.75	0.025029	0.004522	12	0.032618	0.005533	12
	225	0.024948	0.00449	12	0.032097	0.00535	12
	226.25	0.025074	0.004481	12	0.031683	0.005255	12
	227.5	0.025018	0.004433	12	0.031889	0.00524	12
	228.75	0.025063	0.0045	12	0.031814	0.005203	12
	230	0.025148	0.004556	12	0.031759	0.005196	12
	231.25	0.024912	0.004602	12	0.031582	0.005189	12
	232.5	0.02461	0.004641	12	0.031257	0.005147	12
	233.75	0.024372	0.004611	12	0.031042	0.005103	12
	235	0.024222	0.004591	12	0.031338	0.005287	12
	236.25	0.024079	0.004663	12	0.031505	0.005312	12
	237.5	0.024128	0.004718	12	0.031318	0.005329	12
	238.75	0.024351	0.00472	12	0.030971	0.005279	12
	240	0.024463	0.004762	12	0.030331	0.005057	12
	241.25	0.024254	0.004776	12	0.029718	0.004899	12
	242.5	0.023953	0.00474	12	0.029295	0.004868	12
	243.75	0.023773	0.004739	12	0.028876	0.004838	12
	245	0.023744	0.004802	12	0.028705	0.00486	12
	246.25	0.023607	0.00484	12	0.028027	0.004599	12
	247.5	0.023573	0.004867	12	0.027555	0.004485	12
	248.75	0.023587	0.004826	12	0.027574	0.004557	12
	250	0.02348	0.004844	12	0.027541	0.00452	12
	251.25	0.023408	0.00481	12	0.027838	0.004484	12
	252.5	0.023371	0.004787	12	0.027866	0.004502	12
	253.75	0.023119	0.004791	12	0.027741	0.004511	12
	255	0.022914	0.004777	12	0.027059	0.004344	12
	256.25	0.022837	0.004816	12	0.026682	0.004402	12
	257.5	0.022651	0.004775	12	0.026606	0.004352	12
	258.75	0.022188	0.00489	12	0.026277	0.004285	12
	260	0.021799	0.004964	12	0.026037	0.004248	12
	261.25	0.021856	0.005026	12	0.026717	0.004451	12
	262.5	0.021945	0.005051	12	0.027119	0.004611	12
	263.75	0.021921	0.005074	12	0.027247	0.004692	12
	265	0.021901	0.005048	12	0.027146	0.004646	12
	266.25	0.021925	0.005044	12	0.027466	0.004591	12
	267.5	0.022037	0.005059	12	0.027479	0.004565	12
	268.75	0.021925	0.005124	12	0.027121	0.004422	12
	270	0.021726	0.005085	12	0.02717	0.00458	12
	271.25	0.021653	0.005107	12	0.029322	0.005127	12
	272.5	0.021388	0.005068	12	0.029224	0.005223	12
	273.75	0.021296	0.005011	12	0.029357	0.005335	12
	275	0.021397	0.005051	12	0.029944	0.00573	12
	276.25	0.021345	0.004993	12	0.030445	0.006109	12
	277.5	0.021512	0.005053	12	0.030101	0.006167	12
	278.75	0.021325	0.004958	12	0.030175	0.006196	12
	280	0.02137	0.004887	12	0.030576	0.006434	12
	281.25	0.021541	0.004863	12	0.030492	0.006284	12
	282.5	0.021417	0.004868	12	0.030172	0.006133	12
	283.75	0.021499	0.00489	12	0.029896	0.006075	12
	285	0.021374	0.004859	12	0.029861	0.006082	12
	286.25	0.021294	0.004864	12	0.029776	0.006368	12
	287.5	0.021123	0.004872	12	0.030078	0.006774	12
	288.75	0.021029	0.004814	12	0.030119	0.00689	12
	290	0.021022	0.004804	12	0.030124	0.006758	12
	291.25	0.020995	0.004788	12	0.027787	0.006365	12
	292.5	0.021102	0.004795	12	0.027695	0.006357	12
	293.75	0.021146	0.00487	12	0.027506	0.00638	12
	295	0.020988	0.004868	12	0.026943	0.006074	12
	296.25	0.020888	0.004878	12	0.025829	0.005557	12
	297.5	0.020755	0.004869	12	0.02614	0.005683	12
	298.75	0.020691	0.004881	12	0.025745	0.005569	12
	300	0.020616	0.00497	12	0.025051	0.005239	12
	301.25	0.02025	0.004967	12	0.024699	0.00511	12
	302.5	0.020177	0.004934	12	0.024785	0.005141	12
	303.75	0.019936	0.00489	12	0.024933	0.005212	12
	305	0.019909	0.004901	12	0.025706	0.005508	12
	306.25	0.019829	0.004834	12	0.025361	0.005364	12
	307.5	0.019866	0.004827	12	0.024456	0.005082	12
	308.75	0.019882	0.004837	12	0.024229	0.005033	12
	310	0.020017	0.004911	12	0.024191	0.005146	12
	311.25	0.020125	0.004931	12	0.024293	0.005221	12
	312.5	0.020043	0.004905	12	0.024152	0.005334	12
	313.75	0.019966	0.004882	12	0.023743	0.005266	12
	315	0.019861	0.004828	12	0.023485	0.005173	12
	316.25	0.019936	0.00487	12	0.023638	0.005231	12
	317.5	0.019963	0.004872	12	0.023533	0.005136	12
	318.75	0.020048	0.004893	12	0.023662	0.005317	12
	320	0.019987	0.004874	12	0.023809	0.005433	12
	321.25	0.020029	0.004871	12	0.023772	0.005441	12
	322.5	0.02004	0.0049	12	0.023453	0.005441	12
	323.75	0.020074	0.004914	12	0.023207	0.005482	12
	325	0.020065	0.004923	12	0.02276	0.005364	12
	326.25	0.020192	0.00501	12	0.022519	0.005334	12
	327.5	0.020131	0.005	12	0.022447	0.005346	12
	328.75	0.020111	0.005016	12	0.022485	0.005321	12
	330	0.020015	0.004953	12	0.022272	0.005128	12
	331.25	0.01995	0.004945	12	0.022043	0.005023	12
	332.5	0.020109	0.005034	12	0.022107	0.004799	12
	333.75	0.020163	0.005053	12	0.022198	0.004838	12
	335	0.020209	0.005087	12	0.022219	0.004813	12
	336.25	0.020111	0.005037	12	0.022073	0.004743	12
	337.5	0.0201	0.005017	12	0.021524	0.004426	12
	338.75	0.020147	0.005044	12	0.02112	0.004245	12
	340	0.020175	0.005042	12	0.020814	0.004127	12
	341.25	0.019984	0.004978	12	0.020798	0.00414	12
	342.5	0.020116	0.005042	12	0.020781	0.004101	12
	343.75	0.020016	0.005033	12	0.020782	0.004034	12
	345	0.020004	0.004986	12	0.020775	0.003651	12
	346.25	0.019941	0.004955	12	0.020765	0.003618	12
	347.5	0.019996	0.004984	12	0.020526	0.003621	12
	348.75	0.020005	0.004959	12	0.020568	0.003657	12
	350	0.019998	0.004957	12	0.020739	0.003682	12
	351.25	0.019933	0.004926	12	0.021134	0.003656	12
	352.5	0.019753	0.004868	12	0.021089	0.003695	12
	353.75	0.019665	0.004825	12	0.020953	0.003621	12
	355	0.01968	0.004824	12	0.020961	0.003636	12
	356.25	0.019715	0.004856	12	0.020976	0.003675	12
	357.5	0.019617	0.004826	12	0.021208	0.003767	12
	358.75	0.019633	0.004832	12	0.021495	0.003855	12
	360	0.01973	0.004882	12	0.021536	0.003867	12
	361.25	0.0199	0.004972	12	0.021448	0.003829	12
	362.5	0.019836	0.004919	12	0.021585	0.00391	12
	363.75	0.01988	0.004945	12	0.021458	0.003926	12
	365	0.019853	0.004964	12	0.020975	0.003969	12
	366.25	0.019862	0.005001	12	0.020777	0.004036	12
	367.5	0.019761	0.004946	12	0.02078	0.004037	12
	368.75	0.019652	0.004907	12	0.02075	0.004025	12
	370	0.01966	0.00494	12	0.020366	0.0039	12
	371.25	0.019619	0.004956	12	0.019807	0.003855	12
	372.5	0.019641	0.004946	12	0.019537	0.003836	12
	373.75	0.019712	0.004992	12	0.019468	0.003832	12
	375	0.019644	0.004997	12	0.019395	0.003827	12
	376.25	0.019742	0.005041	12	0.019376	0.003799	12
	377.5	0.019732	0.005035	12	0.019334	0.003767	12
	378.75	0.019671	0.005003	12	0.01914	0.003671	12
	380	0.019589	0.004952	12	0.019139	0.003661	12
	381.25	0.019578	0.004919	12	0.019448	0.0037	12
	382.5	0.019523	0.004875	12	0.019294	0.003619	12
	383.75	0.019637	0.004901	12	0.0194	0.003569	12
	385	0.019619	0.004887	12	0.019502	0.003578	12
	386.25	0.019563	0.004843	12	0.019446	0.00354	12
	387.5	0.019659	0.004896	12	0.019483	0.003586	12
	388.75	0.019692	0.004942	12	0.019321	0.003566	12
	390	0.019544	0.004875	12	0.019262	0.00358	12
	391.25	0.01962	0.004884	12	0.019213	0.003586	12
	392.5	0.0197	0.00493	12	0.019316	0.003579	12
	393.75	0.019662	0.004918	12	0.019396	0.003586	12
	395	0.019625	0.004881	12	0.019387	0.00357	12
	396.25	0.0195	0.004817	12	0.019512	0.0036	12
	397.5	0.019551	0.004835	12	0.019508	0.003635	12
	398.75	0.019622	0.004838	12	0.019391	0.003688	12
	400	0.019601	0.004789	12	0.019336	0.003679	12
	401.25	0.019583	0.004788	12	0.019159	0.003652	12
	402.5	0.019573	0.004803	12	0.019315	0.003725	12
	403.75	0.019563	0.004801	12	0.020957	0.003918	12
	405	0.01968	0.004868	12	0.022756	0.004236	12
	406.25	0.019606	0.004861	12	0.023344	0.004327	12
	407.5	0.019527	0.004842	12	0.023263	0.004297	12
	408.75	0.019623	0.004849	12	0.023328	0.004307	12
	410	0.019782	0.0049	12	0.023415	0.004346	12
	411.25	0.019703	0.004863	12	0.023512	0.004372	12
	412.5	0.019643	0.004818	12	0.023468	0.004379	12
	413.75	0.019764	0.004871	12	0.023439	0.004369	12
	415	0.019816	0.004879	12	0.023469	0.00436	12
	416.25	0.019839	0.004894	12	0.023465	0.004362	12
	417.5	0.019887	0.004938	12	0.023401	0.004345	12
	418.75	0.019828	0.004963	12	0.024141	0.004668	12
	420	0.019681	0.004952	12	0.026508	0.005548	12
	421.25	0.019668	0.004973	12	0.027434	0.006076	12
	422.5	0.019739	0.004993	12	0.027878	0.006324	12
	423.75	0.019718	0.005004	12	0.028516	0.006692	12
	425	0.01972	0.004979	12	0.028256	0.006638	12
	426.25	0.019763	0.004948	12	0.028019	0.006603	12
	427.5	0.019955	0.004954	12	0.027992	0.00662	12
	428.75	0.020004	0.005025	12	0.027949	0.00662	12
	430	0.019959	0.005011	12	0.027962	0.006678	12
	431.25	0.01998	0.005005	12	0.027877	0.006664	12
	432.5	0.019961	0.005005	12	0.027864	0.006654	12
	433.75	0.019764	0.004896	12	0.027932	0.006666	12
	435	0.019907	0.004954	12	0.028053	0.006663	12
	436.25	0.020039	0.005013	12	0.028193	0.006793	12
	437.5	0.020018	0.004986	12	0.028371	0.007022	12
	438.75	0.019876	0.004913	12	0.027812	0.006887	12
	440	0.019972	0.004909	12	0.026429	0.006026	12
	441.25	0.020077	0.004867	12	0.025557	0.005454	12
	442.5	0.020111	0.004876	12	0.025005	0.005175	12
	443.75	0.020205	0.0049	12	0.023022	0.004464	12
	445	0.020255	0.004967	12	0.022905	0.004277	12
	446.25	0.020374	0.00505	12	0.02403	0.004534	12
	447.5	0.020148	0.004996	12	0.024282	0.004515	12
	448.75	0.020104	0.004929	12	0.024406	0.004457	12
	450	0.020087	0.004908	12	0.024427	0.004434	12
	451.25	0.020341	0.005023	12	0.024623	0.004515	12
	452.5	0.020441	0.005038	12	0.024949	0.004643	12
	453.75	0.020412	0.005022	12	0.02752	0.00606	12
	455	0.020396	0.005057	12	0.028207	0.006597	12
	456.25	0.020373	0.005032	12	0.028845	0.006832	12
	457.5	0.020397	0.00503	12	0.029166	0.00685	12
	458.75	0.020484	0.005087	12	0.029938	0.007021	12
	460	0.02042	0.005103	12	0.031068	0.007399	12
	461.25	0.020398	0.005168	12	0.031413	0.007521	12
	462.5	0.020272	0.005125	12	0.032757	0.008234	12
	463.75	0.02026	0.005074	12	0.032997	0.008351	12
	465	0.02016	0.005007	12	0.033555	0.008503	12
	466.25	0.020203	0.005031	12	0.034579	0.009257	12
	467.5	0.020328	0.005104	12	0.035555	0.00985	12
	468.75	0.020279	0.005094	12	0.035944	0.010102	12
	470	0.020312	0.00514	12	0.03615	0.010283	12
	471.25	0.020167	0.005057	12	0.036498	0.010566	12
	472.5	0.02016	0.005065	12	0.036878	0.010763	12
	473.75	0.020244	0.005104	12	0.035641	0.009937	12
	475	0.020138	0.005052	12	0.035607	0.009889	12
	476.25	0.020028	0.005038	12	0.035107	0.009776	12
	477.5	0.020099	0.005038	12	0.034806	0.009692	12
	478.75	0.020188	0.005065	12	0.034321	0.009498	12
	480	0.020455	0.00516	12	0.033908	0.009326	12
	481.25	0.020349	0.005082	12	0.034162	0.009635	12
	482.5	0.020555	0.005191	12	0.033141	0.009305	12
	483.75	0.020386	0.005192	12	0.033075	0.009254	12
	485	0.020408	0.005183	12	0.033369	0.009436	12
	486.25	0.020398	0.005189	12	0.032561	0.00871	12
	487.5	0.020428	0.005205	12	0.031376	0.008256	12
	488.75	0.020592	0.005274	12	0.031355	0.008134	12
	490	0.020573	0.005254	12	0.032005	0.008302	12
	491.25	0.020457	0.00524	12	0.032138	0.008219	12
	492.5	0.020444	0.005276	12	0.03297	0.008644	12
	493.75	0.020558	0.005303	12	0.033341	0.008868	12
	495	0.020557	0.005251	12	0.033545	0.008975	12
	496.25	0.020605	0.005216	12	0.034407	0.009342	12
	497.5	0.020495	0.005202	12	0.034925	0.00977	12
	498.75	0.020453	0.005169	12	0.035686	0.010124	12
	500	0.020327	0.005106	12	0.035747	0.010044	12
	501.25	0.020404	0.005185	12	0.035867	0.01019	12
	502.5	0.020218	0.005094	12	0.036144	0.010301	12
	503.75	0.020399	0.005163	12	0.036834	0.01079	12
	505	0.020314	0.005132	12	0.036059	0.010477	12
	506.25	0.020197	0.005074	12	0.035579	0.010345	12
	507.5	0.02013	0.005015	12	0.035918	0.010535	12
	508.75	0.020371	0.005189	12	0.03652	0.010817	12
	510	0.020348	0.005172	12	0.036289	0.010708	12
	511.25	0.020476	0.005227	12	0.035862	0.010682	12
	512.5	0.020639	0.005244	12	0.036562	0.010145	12
	513.75	0.02054	0.005201	12	0.037363	0.01035	12
	515	0.020725	0.005318	12	0.037496	0.010207	12
	516.25	0.020789	0.005381	12	0.036898	0.009872	12
	517.5	0.020855	0.005404	12	0.036459	0.009574	12
	518.75	0.020858	0.005398	12	0.035755	0.009212	12
	520	0.020796	0.005392	12	0.03539	0.009031	12
	521.25	0.02077	0.005343	12	0.03523	0.008721	12
	522.5	0.020909	0.005363	12	0.034948	0.008596	12
	523.75	0.020945	0.005369	12	0.034931	0.008602	12
	525	0.021108	0.005417	12	0.034992	0.008715	12
	526.25	0.02098	0.005341	12	0.035571	0.009069	12
	527.5	0.021131	0.005397	12	0.035554	0.009053	12
	528.75	0.020953	0.005229	12	0.035341	0.00896	12
	530	0.02103	0.00526	12	0.035328	0.008873	12
	531.25	0.02116	0.005189	12	0.035443	0.008813	12
	532.5	0.021107	0.005104	12	0.034322	0.008956	12
	533.75	0.021109	0.005104	12	0.033495	0.008639	12
	535	0.020897	0.004987	12	0.032761	0.008492	12
	536.25	0.020948	0.004949	12	0.033382	0.008759	12
	537.5	0.021055	0.004956	12	0.034778	0.009217	12
	538.75	0.021171	0.004953	12	0.035464	0.00941	12
	540	0.021039	0.004895	12	0.035881	0.009484	12
	541.25	0.021414	0.005077	12	0.036141	0.009514	12
	542.5	0.021783	0.005199	12	0.036258	0.009448	12
	543.75	0.021657	0.005093	12	0.035667	0.009092	12
	545	0.021613	0.005086	12	0.036093	0.00936	12
	546.25	0.021906	0.005167	12	0.035578	0.009107	12
	547.5	0.02195	0.005227	12	0.035955	0.009051	12
	548.75	0.021698	0.005127	12	0.036105	0.009151	12
	550	0.021649	0.005084	12	0.036713	0.009378	12
	551.25	0.021566	0.005132	12	0.036737	0.009476	12
	552.5	0.021368	0.005118	12	0.037381	0.009456	12
	553.75	0.021354	0.005123	12	0.037275	0.009296	12
	555	0.021444	0.005179	12	0.038654	0.009604	12
	556.25	0.021393	0.005199	12	0.039313	0.009859	12
	557.5	0.02122	0.005146	12	0.039035	0.009748	12
	558.75	0.021134	0.005134	12	0.038674	0.00985	12
	560	0.02145	0.005144	12	0.039839	0.010728	12
	561.25	0.021136	0.00499	12	0.040111	0.010874	12
	562.5	0.020693	0.004819	12	0.04042	0.010916	12
	563.75	0.021072	0.004935	12	0.040399	0.010894	12
	565	0.021178	0.004906	12	0.040044	0.010694	12
	566.25	0.021187	0.004898	12	0.040069	0.010701	12
	567.5	0.02118	0.004854	12	0.040268	0.010913	12
	568.75	0.021431	0.004974	12	0.040137	0.010799	12
	570	0.02147	0.005003	12	0.040008	0.010877	12
	571.25	0.021495	0.005035	12	0.040497	0.010997	12
	572.5	0.02175	0.005193	12	0.039735	0.010808	12
	573.75	0.021934	0.005247	12	0.039875	0.010907	12
	575	0.022383	0.005304	12	0.039413	0.010515	12
	576.25	0.022281	0.00527	12	0.038524	0.010028	12
	577.5	0.022281	0.005258	12	0.038005	0.009822	12
	578.75	0.022264	0.005253	12	0.038227	0.009765	12
	580	0.022233	0.005302	12	0.038129	0.009374	12
	581.25	0.022335	0.005252	12	0.039581	0.009497	12
	582.5	0.022493	0.005282	12	0.040152	0.009853	12
	583.75	0.022227	0.00518	12	0.040228	0.009859	12
	585	0.022117	0.005181	12	0.040528	0.009806	12
	586.25	0.021944	0.005202	12	0.040569	0.009736	12
	587.5	0.022052	0.005255	12	0.040149	0.009457	12
	588.75	0.022041	0.005223	12	0.039784	0.009476	12
	590	0.022239	0.005311	12	0.039835	0.00934	12
	591.25	0.022173	0.005249	12	0.039638	0.009368	12
	592.5	0.022119	0.005105	12	0.040561	0.009884	12
	593.75	0.02206	0.005	12	0.041364	0.010232	12
	595	0.021669	0.004917	12	0.041812	0.010604	12
	596.25	0.022008	0.004996	12	0.042533	0.010669	12
	597.5	0.022132	0.005059	12	0.042468	0.010634	12
	598.75	0.022275	0.005081	12	0.04248	0.01066	12
	600	0.02246	0.005145	12	0.042422	0.010649	12
	601.25	0.022547	0.005103	12	0.040466	0.010284	12
	602.5	0.022325	0.005061	12	0.03976	0.009916	12
	603.75	0.022278	0.00502	12	0.040244	0.010156	12
	605	0.022402	0.005114	12	0.0403	0.010218	12
	606.25	0.022417	0.005037	12	0.040318	0.01023	12
	607.5	0.022308	0.004975	12	0.040536	0.010267	12
	608.75	0.022519	0.005058	12	0.040413	0.010149	12
	610	0.022302	0.004923	12	0.040216	0.009954	12
	611.25	0.022295	0.004898	12	0.040238	0.009819	12
	612.5	0.022274	0.00492	12	0.040192	0.009422	12
	613.75	0.022296	0.004952	12	0.039146	0.009088	12
	615	0.022172	0.004912	12	0.038341	0.008669	12
	616.25	0.02186	0.004838	12	0.037671	0.008924	12
	617.5	0.021786	0.00476	12	0.037704	0.008876	12
	618.75	0.02173	0.004748	12	0.038446	0.009221	12
	620	0.021474	0.004621	12	0.038461	0.009259	12
	621.25	0.021645	0.00475	12	0.03894	0.00947	12
	622.5	0.022092	0.004799	12	0.038984	0.009588	12
	623.75	0.022322	0.004881	12	0.039154	0.009569	12
	625	0.022345	0.004874	12	0.038946	0.009395	12
	626.25	0.022499	0.004961	12	0.040033	0.009396	12
	627.5	0.022415	0.004867	12	0.040547	0.009448	12
	628.75	0.022027	0.004695	12	0.041003	0.009672	12
	630	0.022261	0.004718	12	0.04204	0.010208	12
	631.25	0.022166	0.00467	12	0.042005	0.010343	12
	632.5	0.022079	0.004635	12	0.041649	0.010436	12
	633.75	0.022337	0.00471	12	0.04163	0.010376	12
	635	0.022617	0.004872	12	0.042186	0.010539	12
	636.25	0.02275	0.004917	12	0.041888	0.010286	12
	637.5	0.022812	0.004941	12	0.041474	0.010208	12
	638.75	0.022807	0.004895	12	0.040707	0.009936	12
	640	0.022802	0.004905	12	0.040478	0.009974	12
	641.25	0.022585	0.004857	12	0.040729	0.010176	12
	642.5	0.022269	0.004861	12	0.040771	0.010135	12
	643.75	0.022129	0.004789	12	0.040112	0.009965	12
	645	0.022193	0.004685	12	0.040617	0.010336	12
	646.25	0.022441	0.004822	12	0.040365	0.010248	12
	647.5	0.022612	0.004983	12	0.039707	0.010203	12
	648.75	0.022711	0.004978	12	0.040206	0.010016	12
	650	0.022471	0.004961	12	0.039653	0.009616	12
	651.25	0.02289	0.00507	12	0.039932	0.009712	12
	652.5	0.022952	0.005073	12	0.039769	0.009577	12
	653.75	0.022908	0.005086	12	0.039962	0.009634	12
	655	0.022593	0.004904	12	0.039412	0.009361	12
	656.25	0.022714	0.004864	12	0.039916	0.00946	12
	657.5	0.023011	0.004882	12	0.040342	0.009697	12
	658.75	0.023013	0.004846	12	0.040576	0.009789	12
	660	0.022969	0.004834	12	0.040004	0.00949	12
	661.25	0.023121	0.004833	12	0.039991	0.009345	12
	662.5	0.023261	0.004899	12	0.040099	0.00931	12
	663.75	0.023281	0.004961	12	0.039786	0.00916	12
	665	0.023136	0.004979	12	0.038991	0.008818	12
	666.25	0.022701	0.004767	12	0.038923	0.008789	12
	667.5	0.022616	0.004614	12	0.038626	0.00875	12
	668.75	0.022685	0.004631	12	0.038522	0.008905	12
	670	0.02271	0.004611	12	0.038948	0.009007	12
	671.25	0.022483	0.004535	12	0.039723	0.008957	12
	672.5	0.022747	0.004654	12	0.040096	0.009051	12
	673.75	0.022811	0.004591	12	0.040228	0.009144	12
	675	0.023027	0.004695	12	0.040556	0.009281	12
	676.25	0.022932	0.004692	12	0.040757	0.009434	12
	677.5	0.022729	0.004639	12	0.040792	0.009433	12
	678.75	0.022743	0.004734	12	0.04187	0.009637	12
	680	0.022995	0.004804	12	0.041747	0.009496	12
	681.25	0.022945	0.004817	12	0.041271	0.009283	12
	682.5	0.022822	0.004762	12	0.040935	0.009275	12
	683.75	0.022857	0.004806	12	0.041644	0.009548	12
	685	0.022772	0.004801	12	0.042375	0.009744	12
	686.25	0.023065	0.004818	12	0.042572	0.009935	12
	687.5	0.023052	0.004833	12	0.042921	0.010034	12
	688.75	0.022949	0.004816	12	0.042355	0.009798	12
	690	0.023137	0.004878	12	0.041853	0.009611	12
	691.25	0.023147	0.004964	12	0.041004	0.00931	12
	692.5	0.022987	0.004859	12	0.040746	0.009172	12
	693.75	0.022966	0.004913	12	0.040769	0.009136	12
	695	0.02305	0.004837	12	0.042319	0.009652	12
	696.25	0.023096	0.004798	12	0.042533	0.009572	12
	697.5	0.02311	0.004838	12	0.043187	0.009697	12
	698.75	0.02314	0.004825	12	0.04205	0.009419	12
	700	0.023177	0.004776	12	0.043119	0.00981	12
	701.25	0.023355	0.00471	12	0.043581	0.010023	12
	702.5	0.023473	0.004669	12	0.043873	0.01004	12
	703.75	0.023815	0.004843	12	0.044499	0.010107	12
	705	0.024064	0.004851	12	0.044604	0.010226	12
	706.25	0.024114	0.004877	12	0.044639	0.010063	12
	707.5	0.024188	0.004898	12	0.045067	0.010072	12
	708.75	0.024849	0.005005	12	0.045095	0.010058	12
	710	0.024727	0.004932	12	0.044581	0.009898	12
	711.25	0.024677	0.004907	12	0.044331	0.009966	12
	712.5	0.024822	0.004919	12	0.044967	0.010299	12
	713.75	0.0247	0.004844	12	0.04551	0.010621	12
	715	0.024707	0.004971	12	0.044456	0.010248	12
	716.25	0.024615	0.005024	12	0.044843	0.01033	12
	717.5	0.024969	0.005194	12	0.044176	0.010105	12
	718.75	0.024929	0.005164	12	0.044361	0.010033	12
	720	0.024842	0.00515	12	0.043002	0.009515	12
	721.25	0.024466	0.005151	12	0.043027	0.009513	12
	722.5	0.024581	0.005202	12	0.043073	0.009543	12
	723.75	0.024222	0.004928	12	0.042337	0.009286	12
	725	0.02419	0.004992	12	0.042326	0.009094	12
	726.25	0.024135	0.00502	12	0.042688	0.009315	12
	727.5	0.024266	0.004961	12	0.042088	0.009275	12
	728.75	0.023717	0.004934	12	0.042782	0.009503	12
	730	0.023656	0.004973	12	0.043092	0.009748	12
	731.25	0.023867	0.004983	12	0.04398	0.009924	12
	732.5	0.023739	0.004904	12	0.044147	0.009892	12
	733.75	0.023776	0.004919	12	0.043472	0.00963	12
	735	0.023656	0.004833	12	0.04385	0.009706	12
	736.25	0.024057	0.004907	12	0.043554	0.009635	12
	737.5	0.023725	0.004749	12	0.043661	0.009672	12
	738.75	0.023859	0.004781	12	0.044177	0.009769	12
	740	0.024245	0.004866	12	0.045212	0.010127	12
	741.25	0.024686	0.004885	12	0.044914	0.009945	12
	742.5	0.024432	0.004796	12	0.044845	0.00992	12
	743.75	0.024349	0.004793	12	0.045243	0.010147	12
	745	0.024107	0.004699	12	0.044931	0.010152	12
	746.25	0.023952	0.004709	12	0.044596	0.01	12
	747.5	0.023796	0.004739	12	0.044774	0.010029	12
	748.75	0.023691	0.004717	12	0.044671	0.010061	12
	750	0.024202	0.00476	12	0.045337	0.010322	12
	751.25	0.024047	0.00466	12	0.045326	0.01024	12
	752.5	0.023948	0.004676	12	0.044948	0.010096	12
	753.75	0.023828	0.004629	12	0.045329	0.010274	12
	755	0.02415	0.004685	12	0.045033	0.010313	12
	756.25	0.023943	0.004654	12	0.044652	0.010216	12
	757.5	0.023924	0.004626	12	0.044626	0.010242	12
	758.75	0.023795	0.00456	12	0.044234	0.010246	12
	760	0.023569	0.00448	12	0.044061	0.010247	12
	761.25	0.023167	0.004481	12	0.04375	0.010317	12
	762.5	0.023385	0.004505	12	0.04397	0.010441	12
	763.75	0.023829	0.004559	12	0.043635	0.010314	12
	765	0.024198	0.004682	12	0.043699	0.01037	12
	766.25	0.024196	0.004639	12	0.043304	0.010331	12
	767.5	0.024057	0.004597	12	0.043296	0.01043	12
	768.75	0.024153	0.004543	12	0.042628	0.010211	12
	770	0.023617	0.004467	12	0.041618	0.009815	12
	771.25	0.023654	0.004482	12	0.041401	0.010039	12
	772.5	0.023816	0.004559	12	0.041068	0.009904	12
	773.75	0.024284	0.004673	12	0.040419	0.009623	12
	775	0.024	0.00462	12	0.039838	0.009413	12
	776.25	0.023872	0.004497	12	0.039348	0.009274	12
	777.5	0.023758	0.004508	12	0.039438	0.009318	12
	778.75	0.024129	0.004559	12	0.038799	0.00938	12
	780	0.024126	0.004531	12	0.03825	0.009219	12
	781.25	0.024177	0.004507	12	0.038221	0.009199	12
	782.5	0.024457	0.004602	12	0.037841	0.009028	12
	783.75	0.024049	0.004561	12	0.037938	0.009138	12
	785	0.024401	0.004545	12	0.038104	0.009287	12
	786.25	0.02434	0.004472	12	0.038196	0.009492	12
	787.5	0.024392	0.004476	12	0.037773	0.009319	12
	788.75	0.024306	0.004476	12	0.038279	0.009497	12
	790	0.02457	0.004467	12	0.038586	0.009591	12
	791.25	0.024569	0.004556	12	0.038259	0.009121	12
	792.5	0.024517	0.004524	12	0.037898	0.008934	12
	793.75	0.024111	0.004377	12	0.037821	0.008848	12
	795	0.024094	0.004306	12	0.037654	0.008714	12
	796.25	0.024057	0.004303	12	0.037725	0.008879	12
	797.5	0.024707	0.004395	12	0.037804	0.009016	12
	798.75	0.024433	0.004418	12	0.037833	0.008928	12
	800	0.024368	0.004459	12	0.038274	0.008882	12
	801.25	0.024458	0.004454	12	0.038683	0.008993	12
	802.5	0.024289	0.004378	12	0.039067	0.009243	12
	803.75	0.024548	0.004394	12	0.038955	0.009185	12
	805	0.023934	0.004287	12	0.038524	0.009035	12
	806.25	0.024089	0.004335	12	0.038474	0.008898	12
	807.5	0.024239	0.004371	12	0.03889	0.009002	12
	808.75	0.02416	0.004367	12	0.038362	0.008838	12
	810	0.024229	0.004452	12	0.038535	0.00881	12
	811.25	0.024093	0.004399	12	0.038347	0.008836	12
	812.5	0.024473	0.004322	12	0.038546	0.008974	12
	813.75	0.024519	0.004405	12	0.03946	0.009114	12
	815	0.024646	0.004409	12	0.039563	0.00925	12
	816.25	0.024798	0.004505	12	0.039824	0.009152	12
	817.5	0.024117	0.004384	12	0.039421	0.008842	12
	818.75	0.024188	0.004427	12	0.039321	0.008662	12
	820	0.024141	0.004398	12	0.038726	0.008487	12
	821.25	0.024167	0.004564	12	0.038542	0.008247	12
	822.5	0.024112	0.004572	12	0.038618	0.008216	12
	823.75	0.024256	0.004576	12	0.038637	0.008111	12
	825	0.024191	0.004579	12	0.038615	0.008007	12
	826.25	0.024219	0.004667	12	0.038818	0.008021	12
	827.5	0.024296	0.004765	12	0.038568	0.007855	12
	828.75	0.024422	0.004809	12	0.039043	0.007942	12
	830	0.02425	0.004736	12	0.038527	0.007841	12
	831.25	0.024602	0.004754	12	0.038685	0.007755	12
	832.5	0.024679	0.004816	12	0.038664	0.007755	12
	833.75	0.024867	0.004705	12	0.037838	0.007563	12
	835	0.024716	0.004721	12	0.038545	0.007956	12
	836.25	0.024513	0.004643	12	0.03885	0.008168	12
	837.5	0.024599	0.00465	12	0.038912	0.00823	12
	838.75	0.024424	0.004553	12	0.039257	0.008502	12
	840	0.024454	0.00451	12	0.039794	0.008836	12
	841.25	0.024874	0.004636	12	0.039627	0.008786	12
	842.5	0.02487	0.004709	12	0.039007	0.008419	12
	843.75	0.024449	0.0047	12	0.038749	0.008379	12
	845	0.024637	0.004761	12	0.038742	0.008523	12
	846.25	0.024534	0.004627	12	0.038196	0.008362	12
	847.5	0.024427	0.00447	12	0.037869	0.008342	12
	848.75	0.024571	0.004582	12	0.037709	0.008453	12
	850	0.024833	0.004703	12	0.03775	0.008604	12
	851.25	0.024915	0.004763	12	0.037908	0.008922	12
	852.5	0.024516	0.004748	12	0.037797	0.008973	12
	853.75	0.024337	0.004764	12	0.038139	0.009076	12
	855	0.024452	0.004829	12	0.037589	0.008652	12
	856.25	0.024495	0.00481	12	0.036915	0.008394	12
	857.5	0.024481	0.004799	12	0.036942	0.008295	12
	858.75	0.024603	0.00484	12	0.036264	0.007982	12
	860	0.024606	0.004932	12	0.035484	0.007651	12
	861.25	0.024054	0.004689	12	0.03511	0.007539	12
	862.5	0.023883	0.004643	12	0.035074	0.007541	12
	863.75	0.024284	0.004765	12	0.03476	0.007433	12
	865	0.024585	0.004903	12	0.035048	0.007302	12
	866.25	0.025101	0.005137	12	0.035172	0.007356	12
	867.5	0.025298	0.005263	12	0.035472	0.007484	12
	868.75	0.025201	0.005115	12	0.035275	0.00744	12
	870	0.024919	0.004995	12	0.035239	0.007415	12
	871.25	0.024559	0.004959	12	0.035626	0.007628	12
	872.5	0.024695	0.005046	12	0.036458	0.008119	12
	873.75	0.024763	0.005095	12	0.036863	0.008432	12
	875	0.024711	0.005031	12	0.036908	0.008477	12
	876.25	0.025196	0.005002	12	0.036802	0.008503	12
	877.5	0.025164	0.004981	12	0.037534	0.008907	12
	878.75	0.025132	0.004942	12	0.037924	0.009205	12
	880	0.024949	0.004879	12	0.037835	0.009233	12
	881.25	0.024938	0.004848	12	0.038166	0.009335	12
	882.5	0.025073	0.004878	12	0.038391	0.009358	12
	883.75	0.025361	0.004939	12	0.03852	0.009419	12
	885	0.025694	0.004864	12	0.037776	0.009351	12
	886.25	0.025613	0.004768	12	0.03788	0.009513	12
	887.5	0.025556	0.004707	12	0.037707	0.009608	12
	888.75	0.025496	0.004772	12	0.037319	0.009549	12
	890	0.02566	0.004822	12	0.036967	0.009478	12
	891.25	0.025418	0.00477	12	0.03609	0.009032	12
	892.5	0.025187	0.004696	12	0.035519	0.008606	12
	893.75	0.025251	0.004726	12	0.035138	0.008235	12
	895	0.025268	0.004699	12	0.03533	0.008289	12
	896.25	0.025071	0.004776	12	0.036761	0.008369	12
	897.5	0.025428	0.004831	12	0.037186	0.008152	12
	898.75	0.025597	0.004965	12	0.036992	0.007946	12
	900	0.025889	0.00497	12	0.037987	0.008407	12
	901.25	0.025973	0.005057	12	0.038696	0.008617	12
	902.5	0.025832	0.004974	12	0.039239	0.008783	12
	903.75	0.025271	0.004783	12	0.039853	0.008966	12
	905	0.02437	0.004702	12	0.040323	0.009059	12
	906.25	0.023746	0.004612	12	0.040568	0.009123	12
	907.5	0.023438	0.004624	12	0.041124	0.009345	12
	908.75	0.023416	0.00467	12	0.04165	0.009425	12
	910	0.023519	0.004678	12	0.042298	0.009503	12
	911.25	0.024056	0.004728	12	0.042776	0.009529	12
	912.5	0.024686	0.004779	12	0.042952	0.009567	12
	913.75	0.024732	0.004764	12	0.042978	0.00964	12
	915	0.024721	0.004838	12	0.042886	0.009595	12
	916.25	0.024424	0.004834	12	0.042316	0.009497	12
	917.5	0.024278	0.00501	12	0.041186	0.00927	12
	918.75	0.0241	0.004972	12	0.041264	0.009211	12
	920	0.023753	0.004971	12	0.040747	0.008846	12
	921.25	0.023923	0.004928	12	0.040435	0.008673	12
	922.5	0.024669	0.004992	12	0.04032	0.008518	12
	923.75	0.024821	0.005079	12	0.040609	0.008637	12
	925	0.025159	0.00521	12	0.041747	0.009038	12
	926.25	0.02553	0.005317	12	0.042404	0.009306	12
	927.5	0.025628	0.00532	12	0.042022	0.008968	12
	928.75	0.025596	0.005221	12	0.041955	0.008978	12
	930	0.025522	0.005116	12	0.041515	0.008872	12
	931.25	0.025316	0.005142	12	0.041481	0.008882	12
	932.5	0.024861	0.005003	12	0.041351	0.008755	12
	933.75	0.024645	0.004933	12	0.041539	0.008743	12
	935	0.024816	0.004967	12	0.041559	0.008698	12
	936.25	0.02503	0.004891	12	0.041288	0.00865	12
	937.5	0.024806	0.004709	12	0.041655	0.008639	12
	938.75	0.02488	0.004638	12	0.041836	0.008646	12
	940	0.02522	0.004699	12	0.04198	0.008657	12
	941.25	0.02509	0.004631	12	0.04179	0.008578	12
	942.5	0.024474	0.004566	12	0.04131	0.008535	12
	943.75	0.024446	0.004567	12	0.041058	0.008453	12
	945	0.024063	0.00446	12	0.039693	0.008073	12
	946.25	0.023833	0.004412	12	0.037969	0.007624	12
	947.5	0.023948	0.004457	12	0.037895	0.00767	12
	948.75	0.024217	0.004474	12	0.037681	0.007684	12
	950	0.024178	0.004537	12	0.038168	0.00768	12
	951.25	0.024035	0.004478	12	0.038152	0.007638	12
	952.5	0.024577	0.004723	12	0.037805	0.007531	12
	953.75	0.024742	0.004847	12	0.03742	0.00735	12
	955	0.024848	0.00485	12	0.037416	0.007323	12
	956.25	0.025086	0.004884	12	0.037961	0.007254	12
	957.5	0.025451	0.004962	12	0.038075	0.007319	12
	958.75	0.025384	0.004982	12	0.038124	0.007423	12
	960	0.025213	0.004919	12	0.038436	0.007456	12
	961.25	0.025456	0.004959	12	0.039259	0.007721	12
	962.5	0.025476	0.004947	12	0.040717	0.008261	12
	963.75	0.025154	0.004871	12	0.041994	0.009106	12
	965	0.025153	0.004858	12	0.04186	0.009182	12
	966.25	0.025075	0.004784	12	0.042348	0.009378	12
	967.5	0.025174	0.004737	12	0.042161	0.009393	12
	968.75	0.025176	0.004725	12	0.041898	0.009271	12
	970	0.025321	0.004711	12	0.041381	0.00917	12
	971.25	0.025085	0.004751	12	0.040864	0.009097	12
	972.5	0.024579	0.004611	12	0.041309	0.009168	12
	973.75	0.024612	0.004488	12	0.041311	0.009177	12
	975	0.024196	0.00441	12	0.041789	0.009239	12
	976.25	0.023663	0.004385	12	0.041506	0.009227	12
	977.5	0.023238	0.004264	12	0.041258	0.009052	12
	978.75	0.023479	0.004404	12	0.041184	0.008927	12
	980	0.023527	0.004406	12	0.040493	0.008825	12
	981.25	0.023144	0.004386	12	0.040053	0.00874	12
	982.5	0.023013	0.004338	12	0.039619	0.008589	12
	983.75	0.023281	0.004364	12	0.038406	0.007665	12
	985	0.023159	0.004359	12	0.038602	0.007587	12
	986.25	0.023365	0.004523	12	0.038491	0.007591	12
	987.5	0.023255	0.004433	12	0.038361	0.007599	12
	988.75	0.023023	0.004381	12	0.038929	0.007755	12
	990	0.022736	0.004376	12	0.039138	0.007875	12
	991.25	0.022915	0.004388	12	0.039499	0.008017	12
	992.5	0.02264	0.004283	12	0.039483	0.008126	12
	993.75	0.022511	0.004275	12	0.039534	0.008141	12
	995	0.022686	0.004283	12	0.03978	0.008324	12
	996.25	0.022844	0.004303	12	0.04002	0.008455	12
	997.5	0.022916	0.004313	12	0.041096	0.008837	12
	998.75	0.022633	0.00418	12	0.041422	0.009061	12
	1000	0.022594	0.004194	12	0.042137	0.009314	12
	1001.25	0.022943	0.004306	12	0.042134	0.009322	12
	1002.5	0.022988	0.004354	12	0.041634	0.009052	12
	1003.75	0.022788	0.004367	12	0.041056	0.008965	12
	1005	0.022869	0.004416	12	0.040512	0.00892	12
	1006.25	0.022683	0.004271	12	0.040109	0.008798	12
	1007.5	0.023112	0.004251	12	0.040046	0.008817	12
	1008.75	0.023371	0.004397	12	0.039384	0.008747	12
	1010	0.023378	0.004396	12	0.038887	0.008647	12
	1011.25	0.023308	0.004363	12	0.038673	0.008472	12
	1012.5	0.023625	0.00444	12	0.038632	0.008474	12
	1013.75	0.023508	0.004435	12	0.038874	0.008545	12
	1015	0.023438	0.004416	12	0.039069	0.008524	12
	1016.25	0.023807	0.004623	12	0.039651	0.008846	12
	1017.5	0.023694	0.00461	12	0.039064	0.008683	12
	1018.75	0.023624	0.004644	12	0.038867	0.008736	12
	1020	0.023635	0.004636	12	0.038139	0.008468	12
	1021.25	0.023167	0.004537	12	0.037882	0.008542	12
	1022.5	0.023083	0.004542	12	0.037935	0.008748	12
	1023.75	0.023179	0.004518	12	0.038419	0.008926	12
	1025	0.023475	0.004572	12	0.039362	0.009263	12
	1026.25	0.023375	0.004561	12	0.039879	0.009517	12
	1027.5	0.023041	0.004804	12	0.040881	0.009761	12
	1028.75	0.022931	0.004733	12	0.041863	0.009949	12
	1030	0.023329	0.004782	12	0.04292	0.010169	12
	1031.25	0.023674	0.004735	12	0.043272	0.010365	12
	1032.5	0.023595	0.004682	12	0.04362	0.010504	12
	1033.75	0.023655	0.004675	12	0.044252	0.010698	12
	1035	0.023579	0.004647	12	0.044009	0.010659	12
	1036.25	0.023418	0.004435	12	0.043949	0.010522	12
	1037.5	0.023541	0.004472	12	0.044292	0.010642	12
	1038.75	0.023671	0.004401	12	0.044742	0.010866	12
	1040	0.023592	0.004411	12	0.045344	0.011256	12
	1041.25	0.02403	0.004589	12	0.045733	0.011296	12
	1042.5	0.024202	0.004599	12	0.045972	0.0112	12
	1043.75	0.024284	0.004566	12	0.045907	0.011051	12
	1045	0.023952	0.004477	12	0.045649	0.010805	12
	1046.25	0.023814	0.004441	12	0.045595	0.010673	12
	1047.5	0.023521	0.004309	12	0.045421	0.010554	12
	1048.75	0.023449	0.004245	12	0.044784	0.01038	12
	1050	0.02364	0.004328	12	0.044909	0.010579	12
	1051.25	0.0236	0.00442	12	0.045649	0.01081	12
	1052.5	0.023547	0.004431	12	0.045829	0.010764	12
	1053.75	0.023368	0.004423	12	0.046208	0.01108	12
	1055	0.02334	0.004426	12	0.046031	0.010958	12
	1056.25	0.023104	0.004405	12	0.045958	0.010878	12
	1057.5	0.023213	0.004388	12	0.045382	0.010617	12
	1058.75	0.02312	0.004382	12	0.044429	0.010184	12
	1060	0.023275	0.004437	12	0.043602	0.009705	12
	1061.25	0.023143	0.004367	12	0.043046	0.009427	12
	1062.5	0.023126	0.004408	12	0.042698	0.009152	12
	1063.75	0.022867	0.004499	12	0.042562	0.00922	12
	1065	0.022916	0.00448	12	0.042636	0.009355	12
	1066.25	0.023142	0.004516	12	0.042589	0.009342	12
	1067.5	0.023478	0.00449	12	0.042427	0.009458	12
	1068.75	0.02369	0.004488	12	0.04281	0.009588	12
	1070	0.023314	0.004347	12	0.042766	0.009475	12
	1071.25	0.023118	0.004338	12	0.04224	0.009444	12
	1072.5	0.023109	0.00435	12	0.042155	0.009484	12
	1073.75	0.023516	0.004469	12	0.041224	0.008896	12
	1075	0.023641	0.004519	12	0.040996	0.008773	12
	1076.25	0.0237	0.004573	12	0.040847	0.008953	12
	1077.5	0.023735	0.004521	12	0.041366	0.009237	12
	1078.75	0.023816	0.004608	12	0.041909	0.009447	12
	1080	0.024021	0.004706	12	0.042949	0.009884	12
	1081.25	0.024056	0.004803	12	0.043764	0.01032	12
	1082.5	0.024025	0.004856	12	0.043834	0.010611	12
	1083.75	0.024403	0.005015	12	0.043668	0.010534	12
	1085	0.024929	0.005221	12	0.043103	0.010285	12
	1086.25	0.025156	0.005367	12	0.042836	0.01019	12
	1087.5	0.024926	0.005444	12	0.042484	0.010046	12
	1088.75	0.024791	0.005575	12	0.042324	0.010326	12
	1090	0.024672	0.005709	12	0.042	0.010415	12
	1091.25	0.025013	0.005844	12	0.04163	0.01023	12
	1092.5	0.025083	0.005888	12	0.04133	0.009951	12
	1093.75	0.024817	0.005848	12	0.041926	0.010027	12
	1095	0.024713	0.005801	12	0.042066	0.01022	12
	1096.25	0.024587	0.005735	12	0.042276	0.009993	12
	1097.5	0.024677	0.005811	12	0.042998	0.009866	12
	1098.75	0.024581	0.005775	12	0.043092	0.009833	12
	1100	0.024252	0.005627	12	0.042936	0.009853	12
	1101.25	0.024098	0.005465	12	0.042517	0.009555	12
	1102.5	0.024218	0.005346	12	0.043977	0.009329	12
	1103.75	0.024097	0.00513	12	0.044903	0.009433	12
	1105	0.023737	0.004889	12	0.04614	0.009869	12
	1106.25	0.023576	0.004724	12	0.046991	0.010233	12
	1107.5	0.023473	0.004666	12	0.04694	0.010192	12
	1108.75	0.023504	0.004685	12	0.047129	0.010062	12
	1110	0.023305	0.004541	12	0.047326	0.009874	12
	1111.25	0.022959	0.00437	12	0.048617	0.010099	12
	1112.5	0.0227	0.00429	12	0.04884	0.010255	12
	1113.75	0.022929	0.004345	12	0.048482	0.010273	12
	1115	0.023276	0.00444	12	0.048764	0.010333	12
	1116.25	0.023538	0.004492	12	0.048656	0.010261	12
	1117.5	0.023333	0.004395	12	0.048285	0.01027	12
	1118.75	0.02346	0.004316	12	0.048012	0.010402	12
	1120	0.023551	0.004271	12	0.047691	0.010377	12
	1121.25	0.023487	0.004273	12	0.047877	0.01073	12
	1122.5	0.023229	0.004228	12	0.046825	0.010999	12
	1123.75	0.023434	0.004315	12	0.045946	0.011206	12
	1125	0.023323	0.004298	12	0.045445	0.011223	12
	1126.25	0.023212	0.004289	12	0.04525	0.011251	12
	1127.5	0.023101	0.00425	12	0.046003	0.011418	12
	1128.75	0.022782	0.004122	12	0.045965	0.011372	12
	1130	0.022952	0.004187	12	0.045938	0.011439	12
	1131.25	0.023145	0.004152	12	0.045186	0.011212	12
	1132.5	0.023645	0.004334	12	0.045216	0.011129	12
	1133.75	0.023413	0.004244	12	0.045485	0.011045	12
	1135	0.023162	0.004177	12	0.045658	0.01108	12
	1136.25	0.023137	0.004203	12	0.045953	0.01134	12
	1137.5	0.023166	0.004235	12	0.046101	0.011614	12
	1138.75	0.023148	0.004297	12	0.046173	0.011503	12
	1140	0.023336	0.004365	12	0.04612	0.011383	12
	1141.25	0.023191	0.004311	12	0.04573	0.011269	12
	1142.5	0.023259	0.004324	12	0.045737	0.01118	12
	1143.75	0.0228	0.0042	12	0.045707	0.011365	12
	1145	0.022876	0.004182	12	0.04527	0.01119	12
	1146.25	0.022864	0.004166	12	0.045213	0.011148	12
	1147.5	0.022928	0.004169	12	0.045166	0.011187	12
	1148.75	0.023015	0.004196	12	0.045341	0.011238	12
	1150	0.023035	0.004161	12	0.045264	0.011253	12
	1151.25	0.023004	0.004207	12	0.044962	0.011194	12
	1152.5	0.02265	0.004038	12	0.044808	0.011296	12
	1153.75	0.023291	0.00421	12	0.045056	0.011419	12
	1155	0.023323	0.004162	12	0.044907	0.011366	12
	1156.25	0.02306	0.004063	12	0.044966	0.011292	12
	1157.5	0.022985	0.004071	12	0.044526	0.01108	12
	1158.75	0.022868	0.004068	12	0.044905	0.011585	12
	1160	0.022644	0.004044	12	0.04472	0.011622	12
	1161.25	0.02287	0.004097	12	0.045154	0.011738	12
	1162.5	0.022974	0.004113	12	0.045325	0.011766	12
	1163.75	0.023007	0.004191	12	0.045693	0.011797	12
	1165	0.023385	0.00426	12	0.046378	0.012241	12
	1166.25	0.023606	0.004301	12	0.046618	0.01235	12
	1167.5	0.023773	0.004427	12	0.046732	0.012256	12
	1168.75	0.023733	0.00442	12	0.046551	0.012184	12
	1170	0.023727	0.004393	12	0.047101	0.012208	12
	1171.25	0.023576	0.004305	12	0.0477	0.012413	12
	1172.5	0.023578	0.004289	12	0.047826	0.012425	12
	1173.75	0.023118	0.004104	12	0.048067	0.012512	12
	1175	0.023432	0.004318	12	0.04829	0.012669	12
	1176.25	0.023539	0.004359	12	0.048282	0.012612	12
	1177.5	0.023601	0.004388	12	0.049046	0.012795	12
	1178.75	0.023582	0.004374	12	0.04929	0.012654	12
	1180	0.023615	0.004335	12	0.049704	0.012751	12
	1181.25	0.02361	0.004304	12	0.049496	0.012636	12
	1182.5	0.023406	0.004306	12	0.049506	0.01248	12
	1183.75	0.023527	0.004333	12	0.049361	0.012235	12
	1185	0.023589	0.004315	12	0.049348	0.012139	12
	1186.25	0.023691	0.004304	12	0.049416	0.012269	12
	1187.5	0.023608	0.004161	12	0.049453	0.012293	12
	1188.75	0.023715	0.004156	12	0.049684	0.012295	12
	1190	0.023774	0.004196	12	0.04927	0.012157	12
	1191.25	0.023732	0.004255	12	0.048877	0.011813	12
	1192.5	0.023609	0.004344	12	0.049122	0.011939	12
	1193.75	0.023441	0.00439	12	0.048921	0.012005	12
	1195	0.022993	0.00426	12	0.048972	0.011846	12
	1196.25	0.023032	0.004246	12	0.049561	0.011973	12
	1197.5	0.023192	0.004154	12	0.049087	0.011917	12
	1198.75	0.023449	0.004138	12	0.0485	0.011649	12
	1200	0.023379	0.004134	12	0.048078	0.01141	12
	1201.25	0.023318	0.004154	12	0.048386	0.011696	12
	1202.5	0.023519	0.004204	12	0.048447	0.012043	12
	1203.75	0.02347	0.004195	12	0.048548	0.012254	12
	1205	0.023228	0.004243	12	0.0483	0.012121	12
	1206.25	0.023024	0.004316	12	0.047974	0.012046	12
	1207.5	0.023203	0.004283	12	0.047781	0.012162	12
	1208.75	0.023336	0.004293	12	0.047561	0.012135	12
	1210	0.023402	0.004327	12	0.047705	0.012333	12
	1211.25	0.023443	0.004336	12	0.047812	0.012661	12
	1212.5	0.023545	0.004329	12	0.047721	0.012412	12
	1213.75	0.023598	0.004332	12	0.047648	0.012082	12
	1215	0.023779	0.004368	12	0.048019	0.012455	12
	1216.25	0.023885	0.004395	12	0.047501	0.012489	12
	1217.5	0.02384	0.004438	12	0.047816	0.012359	12
	1218.75	0.024055	0.004597	12	0.047927	0.012526	12
	1220	0.024059	0.004579	12	0.048109	0.01285	12
	1221.25	0.02398	0.004579	12	0.047775	0.012657	12
	1222.5	0.023872	0.004564	12	0.047478	0.012345	12
	1223.75	0.024222	0.004589	12	0.047066	0.012368	12
	1225	0.024267	0.004555	12	0.046574	0.012318	12
	1226.25	0.024094	0.0045	12	0.046688	0.012494	12
	1227.5	0.024227	0.004562	12	0.046521	0.012399	12
	1228.75	0.024308	0.004508	12	0.046536	0.01256	12
	1230	0.024307	0.004416	12	0.046368	0.012567	12
	1231.25	0.024382	0.004369	12	0.046674	0.012614	12
	1232.5	0.024531	0.004447	12	0.04725	0.012779	12
	1233.75	0.024518	0.004452	12	0.047576	0.013158	12
	1235	0.024768	0.004561	12	0.047381	0.012915	12
	1236.25	0.025135	0.00471	12	0.047657	0.012735	12
	1237.5	0.02516	0.004752	12	0.047528	0.0126	12
	1238.75	0.024889	0.004654	12	0.047704	0.012825	12
	1240	0.024978	0.004725	12	0.047822	0.012778	12
	1241.25	0.025155	0.004789	12	0.048283	0.012825	12
	1242.5	0.025367	0.004866	12	0.048698	0.012915	12
	1243.75	0.025059	0.004865	12	0.049282	0.012875	12
	1245	0.025151	0.004948	12	0.049937	0.012916	12
	1246.25	0.025333	0.005005	12	0.05019	0.012729	12
	1247.5	0.025287	0.004962	12	0.050635	0.012859	12
	1248.75	0.02546	0.004986	12	0.050811	0.012756	12
	1250	0.025555	0.005044	12	0.052129	0.012711	12
	1251.25	0.026109	0.005119	12	0.052458	0.012701	12
	1252.5	0.026063	0.005035	12	0.052317	0.012698	12
	1253.75	0.026048	0.005013	12	0.051708	0.012313	12
	1255	0.025687	0.004879	12	0.051273	0.012131	12
	1256.25	0.02578	0.004807	12	0.050885	0.011978	12
	1257.5	0.026251	0.004887	12	0.051096	0.012013	12
	1258.75	0.026467	0.004955	12	0.051077	0.011964	12
	1260	0.026702	0.005075	12	0.051197	0.012108	12
	1261.25	0.026779	0.005126	12	0.051099	0.012205	12
	1262.5	0.026767	0.005118	12	0.051354	0.012263	12
	1263.75	0.026853	0.005143	12	0.051567	0.012234	12
	1265	0.02672	0.005178	12	0.051506	0.012032	12
	1266.25	0.026592	0.005173	12	0.051616	0.011912	12
	1267.5	0.026431	0.005168	12	0.051514	0.011626	12
	1268.75	0.026483	0.005186	12	0.051839	0.011614	12
	1270	0.026681	0.005196	12	0.051688	0.011959	12
	1271.25	0.026365	0.005186	12	0.051458	0.012057	12
	1272.5	0.026455	0.00518	12	0.051536	0.012282	12
	1273.75	0.026639	0.005161	12	0.051852	0.012545	12
	1275	0.026904	0.005224	12	0.052292	0.012694	12
	1276.25	0.02666	0.005133	12	0.052749	0.012967	12
	1277.5	0.02621	0.005005	12	0.052163	0.013046	12
	1278.75	0.026082	0.004922	12	0.052309	0.012974	12
	1280	0.02602	0.004814	12	0.053368	0.012919	12
	1281.25	0.026092	0.004767	12	0.053923	0.013301	12
	1282.5	0.025823	0.004707	12	0.053845	0.013534	12
	1283.75	0.025591	0.004657	12	0.053464	0.013537	12
	1285	0.025287	0.004524	12	0.053135	0.013716	12
	1286.25	0.025193	0.004505	12	0.053054	0.013708	12
	1287.5	0.025004	0.004462	12	0.052991	0.013854	12
	1288.75	0.024626	0.004375	12	0.052722	0.013875	12
	1290	0.024204	0.004305	12	0.052713	0.01355	12
	1291.25	0.024081	0.004255	12	0.053107	0.013548	12
	1292.5	0.024227	0.004341	12	0.053419	0.013345	12
	1293.75	0.024117	0.004399	12	0.053525	0.013266	12
	1295	0.024278	0.004438	12	0.053847	0.013369	12
	1296.25	0.024211	0.004487	12	0.053281	0.013064	12
[truncated: 1,843 more rows]
