# Supplementary material for: Microglia facilitate and stabilize the response to general anesthesia via modulating the neuronal network in a brain region-specific manner
Source: eLife. 2023 Dec 22;12:RP92252. doi: 10.7554/eLife.92252 (PMC10746144; doi:10.7554/eLife.92252)
Supplement: Figure 6—source data 4. [file elife-92252-fig6-data4.xlsx]

## Sheet: Figure 6F
		Consciousness (%)
		D7			D21
	Time after pentobarbital injection	Mean	SEM	N	Mean	SEM	N
	-1200	78.3407	6.07029	12	94.4059	2.57831	12
	-1196	78.1347	6.13413	12	94.7556	2.41717	12
	-1192	77.9529	6.19567	12	95.0641	2.27498	12
	-1188	78.2426	6.18109	12	94.8722	2.40693	12
	-1184	78.5018	6.172	12	94.7006	2.52634	12
	-1180	78.735	6.16701	12	94.5461	2.63476	12
	-1176	79.3476	6.02419	12	94.4063	2.73354	12
	-1172	79.5354	5.94501	12	94.2793	2.82383	12
	-1168	79.7053	5.86068	12	94.1633	2.90665	12
	-1164	79.8611	5.7923	12	94.0569	2.98286	12
	-1160	80.0044	5.7372	12	93.9591	3.0532	12
	-1156	80.1368	5.69318	12	93.8688	3.11831	12
	-1152	80.2593	5.6584	12	94.0959	3.00281	12
	-1148	80.073	5.72392	12	94.3067	2.89557	12
	-1144	79.3307	5.75697	12	94.5031	2.79572	12
	-1140	78.9178	5.70891	12	94.6863	2.70253	12
	-1136	78.0959	5.78464	12	94.6863	2.70253	12
	-1132	77.2741	5.88022	12	94.6863	2.70253	12
	-1128	76.9967	5.97042	12	94.4022	2.68373	12
	-1124	77.2781	5.97733	12	93.8385	2.83148	12
	-1120	77.2874	5.99974	12	93.2748	2.98634	12
	-1116	77.0189	6.02333	12	92.7111	3.14727	12
	-1112	77.3022	5.86222	12	92.4274	3.31806	12
	-1108	77.8633	5.70959	12	92.4233	3.3491	12
	-1104	78.4156	5.66534	12	92.1393	3.37502	12
	-1100	78.697	5.72531	12	91.8544	3.23894	12
	-1096	78.9785	5.79887	12	91.5696	3.12309	12
	-1092	79.2585	5.77076	12	91.2848	3.0298	12
	-1088	79.5385	5.74682	12	91	2.9612	12
	-1084	79.5396	5.69727	12	90.7152	2.91903	12
	-1080	79.5407	5.65675	12	90.4304	2.90445	12
	-1076	79.5419	5.62548	12	89.8704	3.04256	12
	-1072	79.2652	5.57385	12	89.3104	3.18882	12
	-1068	78.7178	5.6457	12	89.3096	3.11825	12
	-1064	78.1704	5.73453	12	89.3089	3.06448	12
	-1060	77.9019	5.84406	12	89.5885	2.96654	12
	-1056	77.3522	6.06628	12	89.8681	2.87412	12
	-1052	77.3511	6.18963	12	90.1478	2.78775	12
	-1048	77.3511	6.18963	12	90.4274	2.70801	12
	-1044	77.3511	6.18963	12	90.423	2.73449	12
	-1040	77.3511	6.18963	12	90.1389	2.83867	12
	-1036	77.0711	6.16964	12	89.8548	2.9475	12
	-1032	76.7911	6.15361	12	89.2911	3.11872	12
	-1028	76.7911	6.01803	12	89.007	3.23224	12
	-1024	77.3411	5.90478	12	88.723	3.34924	12
	-1020	77.33	5.8941	12	88.4389	3.46937	12
	-1016	77.3189	5.90209	12	88.1548	3.59232	12
	-1012	77.3078	5.92867	12	87.8707	3.7178	12
	-1008	77.0244	5.94434	12	87.8707	3.7178	12
	-1004	76.7433	5.9406	12	88.1504	3.67377	12
	-1000	76.4622	5.94125	12	88.43	3.6362	12
	-996	76.1789	5.97883	12	88.7096	3.60529	12
	-992	75.6144	6.12599	12	88.9893	3.58122	12
	-988	74.7722	6.24847	12	89.2689	3.56411	12
	-984	74.4922	6.18151	12	89.2689	3.56411	12
	-980	74.2122	6.12714	12	89.5537	3.40151	12
	-976	74.2122	6.0629	12	89.8385	3.25587	12
	-972	74.2122	6.00789	12	90.1233	3.12956	12
	-968	74.2122	5.96237	12	90.4081	3.02501	12
	-964	74.21	6.01823	12	90.693	2.94452	12
	-960	74.2078	6.08301	12	90.9778	2.89011	12
	-956	74.2056	6.15644	12	91.2581	2.88842	12
	-952	74.4811	6.25408	12	91.5385	2.89547	12
	-948	74.7567	6.36309	12	91.5393	2.99902	12
	-944	74.7552	6.45008	12	91.54	3.11723	12
	-940	74.4748	6.51346	12	90.9837	3.19933	12
	-936	74.4715	6.61274	12	90.423	3.29753	12
	-932	74.1904	6.684	12	89.8622	3.40588	12
	-928	73.9093	6.75839	12	89.5781	3.51934	12
	-924	73.6281	6.83579	12	89.2985	3.61049	12
	-920	73.347	6.9161	12	89.2985	3.61049	12
	-916	73.3459	6.98577	12	89.2985	3.61049	12
	-912	73.3448	7.06275	12	89.2985	3.61049	12
	-908	73.6248	7.03694	12	89.0189	3.70626	12
	-904	73.9048	7.02265	12	88.7393	3.80629	12
	-900	74.4659	6.94319	12	88.4596	3.91026	12
	-896	75.027	6.8694	12	88.18	4.01787	12
	-892	75.5881	6.80147	12	87.9004	4.12882	12
	-888	75.8704	6.7058	12	87.6207	4.24286	12
	-884	75.8726	6.60671	12	87.3411	4.35974	12
	-880	75.8748	6.51493	12	87.3456	4.39772	12
	-876	76.157	6.44498	12	87.35	4.44817	12
	-872	76.4393	6.38682	12	87.0704	4.57797	12
	-868	77.0004	6.35349	12	86.7907	4.7096	12
	-864	77.2804	6.41515	12	86.7907	4.7096	12
	-860	77.5604	6.48881	12	86.5067	4.77852	12
	-856	77.2793	6.58356	12	86.2226	4.85153	12
	-852	76.9981	6.68099	12	85.9385	4.92843	12
	-848	76.717	6.78099	12	85.9341	4.88832	12
	-844	76.437	6.75319	12	85.9296	4.85959	12
	-840	75.8848	6.70537	12	85.6456	4.95265	12
	-836	75.6126	6.6855	12	85.3615	5.04886	12
	-832	75.3404	6.66938	12	85.0774	5.14804	12
	-828	75.0681	6.65703	12	84.7933	5.25001	12
	-824	75.073	6.67827	12	84.5093	5.35463	12
	-820	75.0778	6.70818	12	84.5019	5.47103	12
	-816	74.8056	6.70823	12	84.4989	5.58443	12
	-812	74.5333	6.71206	12	84.4959	5.70497	12
	-808	73.9833	6.68621	12	84.2163	5.80954	12
	-804	73.7144	6.5679	12	84.2163	5.80954	12
	-800	73.4433	6.46072	12	84.2163	5.80954	12
	-796	72.8911	6.45687	12	84.2163	5.80954	12
	-792	72.3411	6.45074	12	84.5004	5.70911	12
	-788	71.51	6.48898	12	84.7844	5.61126	12
	-784	70.6711	6.48733	12	85.0685	5.51613	12
	-780	69.8322	6.49524	12	85.0685	5.51613	12
	-776	68.9944	6.50678	12	85.0685	5.51613	12
	-772	68.1567	6.52783	12	85.0685	5.51613	12
	-768	67.5978	6.57293	12	85.0685	5.51613	12
	-764	67.0389	6.62477	12	85.0685	5.51613	12
	-760	66.7578	6.6847	12	84.7844	5.61126	12
	-756	66.7578	6.66829	12	84.5004	5.70911	12
	-752	66.4778	6.64251	12	84.5004	5.70911	12
	-748	65.6378	6.68311	12	84.5004	5.70911	12
	-744	64.7978	6.73252	12	84.5004	5.70911	12
	-740	64.2285	6.70263	12	84.5004	5.70911	12
	-736	63.6604	6.56208	12	84.5004	5.70911	12
	-732	62.8215	6.5157	12	84.5004	5.70911	12
	-728	62.2615	6.47889	12	84.2207	5.81856	12
	-724	62.2522	6.36352	12	83.9411	5.93028	12
	-720	62.5174	6.26827	12	84.2207	5.81856	12
	-716	62.2237	6.19262	12	84.5004	5.70911	12
	-712	61.93	6.13971	12	84.5004	5.70911	12
	-708	61.6444	6.16482	12	84.5004	5.70911	12
	-704	61.3589	6.20325	12	84.5004	5.70911	12
	-700	60.7944	6.26268	12	84.5004	5.70911	12
	-696	60.23	6.33816	12	84.2237	5.69107	12
	-692	59.6656	6.42912	12	84.2311	5.58028	12
	-688	59.3789	6.50909	12	84.5152	5.48576	12
	-684	59.09	6.64277	12	84.7993	5.39413	12
	-680	59.0811	6.74616	12	85.0833	5.30554	12
	-676	59.0744	6.80644	12	85.3674	5.22015	12
	-672	59.0656	6.89301	12	85.3674	5.22015	12
	-668	59.06	6.94463	12	85.3674	5.22015	12
	-664	59.333	6.86329	12	85.3674	5.22015	12
	-660	59.6059	6.79372	12	85.6515	5.13812	12
	-656	59.607	6.78778	12	85.9356	5.05962	12
	-652	59.6081	6.79017	12	86.2196	4.9848	12
	-648	59.6093	6.80088	12	86.5037	4.91383	12
	-644	59.8811	6.77639	12	86.7878	4.84689	12
	-640	59.8752	6.78787	12	87.0719	4.78415	12
	-636	59.5881	6.88904	12	87.3559	4.72576	12
	-632	59.5811	6.9368	12	87.3559	4.72576	12
	-628	60.1363	6.84479	12	87.3559	4.72576	12
	-624	60.6915	6.76749	12	87.64	4.67191	12
	-620	60.6948	6.79405	12	87.9241	4.62273	12
	-616	60.9781	6.86671	12	87.9241	4.62273	12
	-612	61.2511	6.9431	12	87.9241	4.62273	12
	-608	61.2452	7.07648	12	87.9241	4.62273	12
	-604	61.2496	7.16525	12	88.2081	4.57839	12
	-600	61.2519	7.15488	12	88.2126	4.68725	12
	-596	61.2519	7.15488	12	88.217	4.80549	12
	-592	61.2519	7.15488	12	88.5011	4.77972	12
	-588	61.2437	7.20306	12	88.7852	4.75897	12
	-584	61.2356	7.25886	12	88.7852	4.75897	12
	-580	61.5063	7.25871	12	88.7852	4.75897	12
	-576	62.0581	7.20371	12	89.0619	4.763	12
	-572	62.617	7.08714	12	89.0544	4.79447	12
	-568	63.1759	6.97536	12	88.7704	4.82146	12
	-564	63.7267	6.94443	12	88.4863	4.85337	12
	-560	63.7196	6.93658	12	88.2022	4.89008	12
	-556	63.9915	6.86751	12	87.9181	4.9315	12
	-552	64.2667	6.85529	12	87.35	4.95912	12
	-548	64.5385	6.81111	12	86.7819	4.99547	12
	-544	64.2585	6.76691	12	86.2137	5.04036	12
	-540	63.6974	6.75994	12	85.6456	5.09357	12
	-536	63.407	6.78819	12	85.357	5.02207	12
	-532	63.6778	6.82258	12	85.0685	4.96594	12
	-528	63.9485	6.86946	12	84.5004	5.04865	12
	-524	63.6778	6.85352	12	83.9322	5.13866	12
	-520	63.407	6.85018	12	83.3641	5.2356	12
	-516	63.1363	6.85946	12	82.7959	5.33908	12
	-512	62.5933	6.83624	12	82.5119	5.36475	12
	-508	61.7693	6.82353	12	82.5074	5.28414	12
	-504	60.9452	6.82043	12	82.503	5.21278	12
	-500	60.4022	6.83355	12	82.7826	5.10854	12
	-496	59.5815	6.81415	12	83.0622	5.0072	12
	-492	59.0419	6.74952	12	83.0622	5.0072	12
	-488	58.5022	6.69993	12	83.0622	5.0072	12
	-484	57.1204	6.59381	12	83.0578	5.00308	12
	-480	55.7385	6.49966	12	83.0533	5.01032	12
	-476	54.9189	6.45988	12	82.7693	5.11288	12
	-472	54.0993	6.43961	12	82.4852	5.21813	12
	-468	53.2796	6.439	12	82.2011	5.3259	12
	-464	52.46	6.45808	12	82.2011	5.3259	12
	-460	51.6404	6.49667	12	82.2011	5.3259	12
	-456	50.8174	6.52156	12	82.4807	5.24661	12
	-452	49.9874	6.57415	12	82.7604	5.17102	12
	-448	49.1574	6.63568	12	83.04	5.09929	12
	-444	48.0567	6.73011	12	83.3196	5.03159	12
	-440	47.2359	6.8201	12	83.5993	4.96808	12
	-436	46.4152	6.91801	12	83.8789	4.90892	12
	-432	45.5911	7.0145	12	84.163	4.86745	12
	-428	44.4893	7.0966	12	84.447	4.8307	12
	-424	44.2204	7.05078	12	84.4567	4.77232	12
	-420	44.2326	7.07059	12	84.4663	4.72466	12
	-416	43.693	7.18441	12	84.4707	4.7659	12
	-412	42.5922	7.25929	12	84.4752	4.81814	12
	-408	41.7622	7.30128	12	84.7593	4.80823	12
	-404	41.4807	7.31563	12	85.0433	4.80341	12
	-400	41.197	7.23611	12	85.3274	4.8037	12
	-396	40.6356	7.17195	12	85.6115	4.8091	12
	-392	40.0674	7.11777	12	85.8956	4.81958	12
	-388	39.4993	7.07707	12	85.62	4.89012	12
	-384	39.21	7.01355	12	85.0604	5.09917	12
	-380	39.2019	7.014	12	84.2167	5.29162	12
	-376	39.1926	7.04499	12	83.657	5.36685	12
	-372	39.1833	7.00452	12	83.1074	5.34235	12
	-368	39.453	6.95044	12	82.5578	5.32651	12
	-364	40.2837	6.8981	12	81.7285	5.40155	12
	-360	40.8356	6.879	12	80.8993	5.48714	12
	-356	41.1063	6.83168	12	80.3496	5.49567	12
	-352	41.377	6.79677	12	79.8	5.51265	12
	-348	41.9278	6.72918	12	79.2504	5.53801	12
	-344	42.4785	6.60122	12	78.9807	5.54536	12
	-340	42.7493	6.53548	12	78.7111	5.55759	12
	-336	42.4644	6.50733	12	77.8815	5.632	12
	-332	41.9089	6.46502	12	77.3215	5.69695	12
	-328	41.9033	6.43109	12	76.7615	5.76926	12
	-324	42.1685	6.44904	12	76.2015	5.84866	12
	-320	42.1615	6.535	12	75.9219	5.94375	12
	-316	41.8837	6.59408	12	75.6422	6.04155	12
	-312	41.8781	6.61879	12	75.6422	6.04155	12
	-308	42.1504	6.62339	12	75.6422	6.04155	12
	-304	41.8707	6.56718	12	75.9167	6.07597	12
	-300	41.5911	6.52323	12	76.1911	6.1145	12
	-296	41.8633	6.55811	12	76.1911	6.1145	12
	-292	42.1356	6.60527	12	75.9111	6.13449	12
	-288	42.137	6.53569	12	75.6311	6.15852	12
	-284	41.8607	6.52714	12	75.0707	6.17661	12
	-280	41.8596	6.519	12	74.5104	6.20174	12
	-276	42.143	6.56423	12	73.95	6.23381	12
	-272	42.4344	6.56855	12	73.3859	6.241	12
	-268	42.447	6.52545	12	73.1019	6.21375	12
	-264	42.4596	6.499	12	73.1019	6.21375	12
	-260	41.6289	6.46456	12	73.1019	6.21375	12
	-256	41.077	6.41274	12	73.1019	6.21375	12
	-252	40.5252	6.26823	12	73.3715	6.20778	12
	-248	39.6933	6.12857	12	73.6411	6.20619	12
	-244	38.8615	6.00552	12	73.9107	6.20898	12
	-240	38.3085	5.86965	12	74.1804	6.21614	12
	-236	37.7556	5.7487	12	74.45	6.22766	12
	-232	36.9248	5.67408	12	74.9996	6.20302	12
	-228	36.0919	5.61259	12	75.5493	6.18582	12
	-224	35.2589	5.67797	12	75.5419	6.18885	12
	-220	34.4281	5.75157	12	75.5344	6.20118	12
	-216	34.1474	5.80486	12	75.8074	6.22032	12
	-212	34.6952	5.83425	12	75.8107	6.21534	12
	-208	34.693	5.78357	12	76.0911	6.22146	12
	-204	34.6907	5.74244	12	76.3715	6.23164	12
	-200	34.9607	5.71947	12	76.6511	6.13478	12
	-196	35.5015	5.67336	12	76.9307	6.04057	12
	-192	35.77	5.62849	12	76.93	5.93948	12
	-188	36.3196	5.5714	12	76.6496	5.93408	12
	-184	36.8693	5.53309	12	76.6496	5.93408	12
	-180	37.1378	5.53157	12	76.6496	5.93408	12
	-176	37.6841	5.51346	12	76.9337	5.8348	12
	-172	38.5115	5.4976	12	77.4978	5.69932	12
	-168	39.3389	5.47886	12	77.4974	5.54736	12
	-164	40.1663	5.47171	12	77.4933	5.49993	12
	-160	40.1607	5.52416	12	77.4893	5.46207	12
	-156	39.8778	5.58658	12	77.4852	5.39837	12
	-152	40.4222	5.64503	12	77.4848	5.35203	12
	-148	41.5163	5.74843	12	77.4844	5.31518	12
	-144	42.3315	5.85027	12	77.4804	5.30599	12
	-140	43.9889	5.8248	12	77.4763	5.30707	12
	-136	45.6463	5.81307	12	77.4722	5.3184	12
	-132	46.7459	5.89433	12	77.4681	5.33993	12
	-128	47.2981	5.93109	12	77.7437	5.27309	12
	-124	47.8515	5.90281	12	78.0193	5.22085	12
	-120	48.9637	5.80982	12	78.0152	5.27399	12
	-116	50.3548	5.76494	12	78.2952	5.23994	12
	-112	52.0237	5.7492	12	78.2952	5.18618	12
	-108	53.137	5.80657	12	78.2952	5.14234	12
	-104	54.2533	5.75575	12	78.5722	5.11826	12
	-100	55.6452	5.76728	12	78.8493	5.11049	12
	-96	56.7659	5.74542	12	79.1263	5.11912	12
	-92	57.3289	5.62705	12	79.683	5.04829	12
	-88	57.8815	5.58161	12	79.9626	4.96562	12
	-84	58.4411	5.51611	12	80.2467	4.90259	12
	-80	59.5619	5.32211	12	80.2511	4.94	12
	-76	61.2396	5.11195	12	80.5352	4.88739	12
	-72	62.9174	4.9089	12	81.0996	4.83816	12
	-68	64.3141	4.78356	12	81.9437	4.69628	12
	-64	65.7107	4.672	12	82.5074	4.55508	12
	-60	67.3885	4.49614	12	83.0711	4.41911	12
	-56	68.7885	4.26604	12	83.3507	4.32403	12
	-52	69.6296	4.0723	12	83.3585	4.2086	12
	-48	70.4707	3.88507	12	83.9307	4.00963	12
	-44	71.5896	3.67187	12	85.0589	3.79285	12
	-40	72.9978	3.53945	12	86.187	3.58349	12
	-36	74.1256	3.28212	12	87.3152	3.37049	12
	-32	74.6863	2.97245	12	88.4433	3.16425	12
	-28	74.6974	2.65682	12	89.5715	2.96617	12
	-24	74.9807	2.41137	12	90.4193	2.74087	12
	-20	75.263	2.22282	12	90.9904	2.4981	12
	-16	75.8241	2.11372	12	91.2844	2.24573	12
	-12	76.123	2.01618	12	91.2981	1.99316	12
	-8	76.9704	1.91624	12	90.7519	1.85733	12
	-4	78.0889	1.92003	12	90.2056	1.79805	12
	0	78.3707	2.06627	12	89.9389	1.73212	12
	4	77.5404	2.22836	12	89.1137	1.6695	12
	8	76.4311	2.41241	12	88.0044	1.65757	12
	12	75.603	2.50142	12	86.8952	1.75591	12
	16	74.7719	2.5141	12	85.7859	1.94791	12
	20	73.943	2.46874	12	84.6767	2.20927	12
	24	73.113	2.49579	12	83.2874	2.47227	12
	28	71.723	2.54702	12	81.3467	2.71118	12
	32	70.3433	2.68792	12	79.1219	2.92268	12
	36	69.2359	2.82898	12	76.8926	3.14007	12
	40	67.5674	2.91818	12	74.6633	3.38299	12
	44	65.0641	3.07816	12	72.1544	3.58141	12
	48	62.2807	3.15684	12	69.6456	3.78688	12
	52	59.4974	3.2475	12	66.867	3.92559	12
	56	56.7141	3.34917	12	64.0885	4.07118	12
	60	53.9396	3.41268	12	61.31	4.22295	12
	64	51.1652	3.48844	12	58.5315	4.38024	12
	68	48.6685	3.55961	12	56.0248	4.54592	12
	72	46.173	3.49709	12	53.5181	4.7194	12
	76	43.3996	3.45608	12	50.7396	4.88773	12
	80	40.8904	3.37369	12	47.9611	5.05979	12
	84	38.9322	3.29517	12	45.4626	5.2394	12
	88	36.9844	3.31686	12	42.6844	5.34072	12
	92	34.7622	3.34725	12	39.6311	5.35391	12
	96	32.2678	3.36962	12	36.2978	5.35391	12
	100	29.4944	3.40879	12	33.2411	5.30701	12
	104	26.4422	3.43862	12	30.4615	5.21852	12
	108	24.21	3.3745	12	28.2422	5.10057	12
	112	22.2567	3.3262	12	26.3033	4.94378	12
	116	20.0311	3.26547	12	24.3644	4.79888	12
	120	17.8044	3.19114	12	22.4256	4.66697	12
	124	16.4111	3.06474	12	20.7611	4.49727	12
	128	15.2967	2.95365	12	19.3807	4.29714	12
	132	14.1789	2.75313	12	18.0004	4.10762	12
	136	13.0611	2.56624	12	16.62	3.93023	12
	140	11.9433	2.39617	12	15.2396	3.7667	12
	144	11.1044	2.26243	12	14.1393	3.68298	12
	148	10.8256	2.18517	12	13.3107	3.59728	12
	152	10.5467	2.14251	12	12.7663	3.51061	12
	156	9.71778	2.08319	12	12.2219	3.4524	12
	160	8.88074	1.97208	12	11.6774	3.42409	12
	164	8.32148	1.8763	12	10.853	3.30828	12
	168	7.77148	1.78512	12	10.0285	3.20892	12
	172	7.22148	1.71547	12	9.4737	3.09577	12
	176	6.67148	1.67005	12	8.91889	2.99414	12
	180	6.11259	1.56408	12	8.64407	3.04537	12
	184	5.5537	1.48222	12	8.36926	3.12171	12
	188	4.99481	1.42863	12	8.09444	3.22136	12
	192	4.43481	1.24327	12	7.53963	3.18754	12
	196	3.87481	1.0682	12	6.98481	3.16831	12
	200	3.32148	0.992646	12	6.43	3.16392	12
	204	3.03889	1.00879	12	5.59519	3.0155	12
	208	2.7563	1.10079	12	5.04	2.86472	12
	212	3.02704	1.19315	12	4.76	2.70557	12
	216	3.29778	1.2999	12	4.76	2.70557	12
	220	3.56852	1.41779	12	4.76	2.70557	12
	224	3.83926	1.54427	12	5.04	2.86472	12
	228	4.38889	1.75861	12	5.04	2.86472	12
	232	4.38889	1.75861	12	5.04	2.86472	12
	236	4.38889	1.75861	12	4.76	2.70557	12
	240	4.66778	1.8499	12	4.48	2.54642	12
	244	4.94667	1.94985	12	4.2	2.38726	12
	248	5.22556	2.05721	12	3.92	2.22811	12
	252	5.22556	2.05721	12	3.64	2.06896	12
	256	5.22556	2.05721	12	3.36	1.90981	12
	260	5.22556	2.05721	12	3.08	1.75066	12
	264	4.94667	1.94985	12	2.8	1.59151	12
	268	4.66778	1.8499	12	2.52	1.43236	12
	272	4.65963	1.88957	12	2.52	1.43236	12
	276	4.65148	1.95812	12	2.52	1.43236	12
	280	4.93037	2.02546	12	2.52	1.43236	12
	284	5.20926	2.10266	12	2.8	1.59151	12
	288	5.76111	2.22371	12	2.8	1.59151	12
	292	6.31296	2.36015	12	2.8	1.59151	12
	296	6.86481	2.50948	12	2.8	1.59151	12
	300	7.13556	2.65171	12	2.52	1.43236	12
	304	7.68407	2.77931	12	2.51444	1.25915	12
	308	8.23259	2.91773	12	2.78889	1.26593	12
	312	8.50333	3.06628	12	3.34333	1.44214	12
	316	9.05296	3.26258	12	3.61778	1.4814	12
	320	9.8837	3.46931	12	3.89222	1.53689	12
	324	10.4437	3.53957	12	4.16667	1.60693	12
	328	10.4519	3.46301	12	4.44111	1.68971	12
	332	10.46	3.40173	12	4.71556	1.78345	12
	336	10.4681	3.35655	12	4.99	1.88654	12
	340	10.1974	3.2358	12	5.26444	1.99751	12
	344	9.92667	3.11908	12	5.25889	2.03183	12
	348	9.37704	2.91113	12	5.25333	2.09415	12
	352	9.92889	3.05444	12	4.97333	2.03694	12
	356	10.4807	3.20722	12	4.97333	2.03694	12
	360	10.7515	3.32885	12	5.52778	2.23385	12
	364	10.4726	3.25465	12	6.08222	2.43289	12
	368	10.1937	3.18663	12	6.9137	2.62002	12
	372	10.7433	3.3834	12	7.47074	2.68359	12
	376	11.293	3.58246	12	7.75074	2.75843	12
	380	11.5719	3.65543	12	8.30519	2.96362	12
	384	11.8507	3.73372	12	8.85963	3.16938	12
	388	11.8507	3.73372	12	9.41407	3.37562	12
	392	11.58	3.61219	12	9.41407	3.37562	12
	396	12.1311	3.68027	12	9.41407	3.37562	12
	400	12.4033	3.66844	12	9.69444	3.35516	12
	404	12.4048	3.54977	12	9.97481	3.34214	12
	408	12.1319	3.51233	12	10.2548	3.42684	12
	412	11.58	3.39051	12	10.5348	3.51671	12
	416	11.2989	3.37909	12	10.8093	3.63373	12
	420	11.2989	3.37909	12	11.0837	3.75412	12
	424	10.7504	3.29433	12	11.0837	3.75412	12
	428	10.7552	3.2436	12	11.0756	3.65167	12
	432	11.0378	3.19567	12	10.793	3.43406	12
	436	11.0415	3.06002	12	10.7904	3.30456	12
	440	10.7641	2.91117	12	10.5159	3.18347	12
	444	10.4844	2.85365	12	10.5215	3.15881	12
	448	11.0274	2.97318	12	10.8015	3.25657	12
	452	11.5793	3.07845	12	11.0815	3.35903	12
	456	11.8604	3.12025	12	11.087	3.37081	12
	460	11.8604	3.12025	12	11.0926	3.40007	12
	464	11.8604	3.12025	12	11.0981	3.44636	12
	468	11.8604	3.12025	12	11.1037	3.50902	12
	472	11.3004	2.98009	12	11.3837	3.64353	12
	476	10.7404	2.84934	12	11.6637	3.77996	12
	480	10.7404	2.84934	12	11.3893	3.72671	12
	484	11.5622	3.08584	12	11.3893	3.72671	12
	488	12.3841	3.32482	12	11.1122	3.73947	12
	492	11.8344	3.15185	12	10.8352	3.75909	12
	496	11.2848	2.9846	12	10.8352	3.75909	12
	500	11.0059	2.90083	12	10.5607	3.71159	12
	504	11.0059	2.90083	12	10.5633	3.65165	12
	508	11.5556	3.06532	12	10.5659	3.60631	12
	512	12.1052	3.23595	12	10.843	3.6019	12
	516	11.5622	3.08584	12	11.12	3.60468	12
	520	11.297	2.91924	12	11.1167	3.63437	12
	524	11.3026	2.84858	12	11.3878	3.71065	12
	528	11.3026	2.84858	12	11.9393	3.77255	12
	532	12.1244	3.08111	12	12.4907	3.84603	12
	536	12.9567	3.26487	12	12.7733	3.97566	12
	540	13.2459	3.3332	12	13.0559	4.12187	12
	544	13.8059	3.48125	12	13.3385	4.28295	12
	548	14.0833	3.60646	12	13.6259	4.44744	12
	552	14.3607	3.74899	12	14.1878	4.64401	12
	556	14.3674	3.83549	12	14.7496	4.85469	12
	560	14.3741	3.93397	12	15.0296	4.99398	12
	564	14.383	3.96064	12	15.0296	4.99398	12
	568	13.84	3.88954	12	15.0322	5.0474	12
	572	13.0093	3.66122	12	15.0348	5.11127	12
	576	12.4493	3.49602	12	15.3119	5.17791	12
	580	12.72	3.56204	12	15.3119	5.17791	12
	584	13.5419	3.76355	12	15.8704	5.15677	12
	588	14.093	3.90046	12	16.4289	5.14445	12
	592	14.0944	3.8573	12	16.7033	5.15151	12
	596	14.0959	3.8285	12	16.9778	5.16367	12
	600	14.0974	3.8144	12	17.5241	5.15315	12
	604	13.8267	3.77148	12	18.073	5.19814	12
	608	13.5559	3.73533	12	18.6219	5.25143	12
	612	14.107	3.90947	12	19.1733	5.34583	12
	616	14.3859	4.04104	12	19.4504	5.4241	12
	620	14.6648	4.1745	12	19.7274	5.50597	12
	624	14.6648	4.1745	12	19.7274	5.50597	12
	628	14.6719	4.13859	12	19.4504	5.4241	12
	632	14.6789	4.11593	12	19.4452	5.3316	12
	636	14.9567	4.11601	12	19.717	5.32238	12
	640	14.9567	4.11601	12	19.9889	5.31818	12
	644	14.6789	4.11593	12	19.9863	5.30145	12
	648	14.9559	4.08172	12	20.5422	5.29434	12
	652	14.69	4.00606	12	21.0981	5.29651	12
	656	13.8659	3.9453	12	21.9285	5.32276	12
	660	13.857	3.9625	12	22.7589	5.36118	12
	664	13.8481	3.99342	12	23.0281	5.34275	12
	668	13.567	3.98995	12	23.0207	5.36523	12
	672	13.2859	3.99323	12	23.0256	5.37615	12
	676	13.0048	4.00324	12	22.7559	5.36793	12
	680	12.7237	4.01993	12	23.04	5.38134	12
	684	12.4426	4.04322	12	23.3119	5.41814	12
	688	12.4426	4.04322	12	23.3067	5.41479	12
	692	12.7215	4.18806	12	23.5759	5.46019	12
	696	13.0004	4.33387	12	24.1293	5.53713	12
	700	13.2793	4.48055	12	24.9596	5.65777	12
	704	13.2848	4.44745	12	25.5207	5.65361	12
	708	13.5611	4.42863	12	26.077	5.57062	12
	712	13.8456	4.56773	12	26.9174	5.52778	12
	716	13.8522	4.7001	12	27.4737	5.53106	12
	720	13.58	4.6886	12	28.0326	5.52964	12
	724	13.3078	4.68251	12	28.3144	5.4956	12
	728	12.7567	4.52971	12	28.5963	5.47661	12
	732	12.2056	4.38224	12	29.4219	5.54186	12
	736	12.1974	4.24304	12	30.2474	5.54389	12
	740	12.4681	4.26163	12	30.8011	5.5132	12
	744	12.4681	4.26163	12	31.6293	5.5173	12
	748	11.9115	4.09461	12	33.0063	5.61943	12
	752	11.6359	3.9074	12	34.1211	5.70055	12
	756	11.3604	3.73274	12	34.6819	5.69823	12
	760	11.0815	3.58311	12	35.2426	5.7141	12
	764	11.637	3.57044	12	35.5193	5.69681	12
	768	11.6378	3.579	12	35.2374	5.6226	12
	772	11.363	3.43488	12	34.9556	5.57313	12
	776	11.3652	3.26946	12	34.9578	5.58789	12
	780	11.093	3.28132	12	34.9504	5.61313	12
	784	11.1019	3.2909	12	35.5041	5.70003	12
	788	11.1122	3.2599	12	36.0604	5.79819	12
	792	10.8415	3.23903	12	36.6044	5.9014	12
	796	10.8415	3.23903	12	37.1459	5.99693	12
	800	10.8415	3.23903	12	37.9619	6.07531	12
	804	11.1122	3.2599	12	38.79	6.1615	12
	808	11.383	3.28889	12	39.3437	6.24865	12
	812	11.383	3.28889	12	39.623	6.33851	12
	816	11.6552	3.26764	12	39.6181	6.40995	12
	820	11.6567	3.22608	12	39.6133	6.48955	12
	824	11.1015	3.0444	12	39.5963	6.59183	12
	828	10.5463	2.88574	12	39.3	6.5831	12
	832	9.98963	2.74262	12	39.0011	6.56711	12
	836	9.71074	2.59425	12	39.2615	6.54125	12
	840	9.71074	2.59425	12	39.8085	6.55772	12
	844	9.71074	2.59425	12	39.8085	6.55772	12
	848	9.98963	2.74262	12	39.8085	6.55772	12
	852	10.2685	2.89208	12	40.0926	6.57527	12
	856	10.2767	3.03797	12	40.6511	6.59614	12
	860	10.0059	2.87329	12	40.9263	6.56712	12
	864	10.0059	2.71351	12	41.2067	6.50088	12
	868	10.2848	2.71537	12	41.2126	6.38917	12
	872	10.5615	2.87922	12	41.4807	6.31114	12
	876	10.5593	3.04285	12	41.7463	6.28753	12
	880	10.5604	3.21086	12	42.0119	6.27651	12
	884	10.0048	3.24389	12	42.5704	6.32082	12
	888	9.72704	3.26234	12	42.8448	6.33175	12
	892	9.72481	3.42938	12	43.1193	6.34681	12
	896	9.72259	3.60474	12	43.3937	6.36597	12
	900	9.4437	3.45095	12	43.6778	6.35903	12
	904	8.8837	3.31212	12	44.23	6.29624	12
	908	8.60148	3.16639	12	44.7796	6.27424	12
	912	8.87259	3.02602	12	45.3293	6.26839	12
	916	9.7037	3.02629	12	46.44	6.29277	12
	920	10.5348	3.04662	12	46.7152	6.30639	12
	924	10.2641	3.06331	12	46.9904	6.33278	12
	928	9.71444	2.94484	12	47.2681	6.35773	12
	932	9.70778	2.84875	12	47.5459	6.4035	12
	936	9.70778	2.84875	12	47.5396	6.38638	12
	940	9.70778	2.84875	12	47.8052	6.418	12
	944	9.97852	2.82235	12	48.0778	6.49143	12
	948	9.97704	2.76004	12	48.6344	6.60323	12
	952	10.2559	2.90253	12	49.1863	6.57197	12
	956	10.5348	3.04662	12	49.463	6.51657	12
	960	10.5348	3.04662	12	49.7422	6.4267	12
	964	10.5348	3.04662	12	50.5685	6.41214	12
	968	10.2559	2.90253	12	51.3948	6.41679	12
	972	9.97704	2.76004	12	51.6652	6.41845	12
	976	9.97037	2.6679	12	51.3748	6.45581	12
	980	9.9637	2.71328	12	51.6396	6.53239	12
	984	9.95704	2.77829	12	51.6248	6.65922	12
	988	10.2293	2.98947	12	51.6148	6.61105	12
	992	10.5037	3.07494	12	51.6178	6.50427	12
	996	10.7848	3.0732	12	52.1748	6.41853	12
	1000	10.7848	3.0732	12	52.7319	6.33887	12
	1004	10.7848	3.0732	12	53.28	6.33658	12
	1008	10.5059	2.95126	12	53.8281	6.35	12
	1012	10.4993	2.92379	12	54.3763	6.37903	12
	1016	10.4926	2.91483	12	54.6404	6.4243	12
	1020	11.0437	3.12198	12	54.9048	6.44456	12
	1024	11.5948	3.33026	12	55.1852	6.4554	12
	1028	11.317	3.33064	12	55.1904	6.42108	12
	1032	10.767	3.23475	12	54.6396	6.35696	12
	1036	9.92926	3.14306	12	53.8048	6.30917	12
	1040	9.09148	3.06894	12	53.2456	6.2663	12
	1044	9.3637	3.18301	12	53.2456	6.2663	12
	1048	9.9237	3.27464	12	54.0711	6.25857	12
	1052	9.93259	3.16608	12	54.8967	6.26016	12
	1056	9.93481	3.07413	12	55.7344	6.21703	12
	1060	9.65593	2.97825	12	56.58	6.10013	12
	1064	9.66407	2.97152	12	56.5807	5.99673	12
	1068	9.94444	3.09971	12	56.3044	5.93988	12
	1072	9.93778	3.13538	12	56.0356	5.87602	12
	1076	9.93111	3.1878	12	56.0359	5.84606	12
	1080	9.92444	3.25616	12	55.4726	5.86584	12
	1084	9.91778	3.33947	12	54.9163	5.84885	12
	1088	10.4689	3.53304	12	54.6441	5.8298	12
	1092	11.5789	3.71754	12	54.0878	5.8847	12
	1096	12.4167	3.77706	12	54.0852	5.91339	12
	1100	12.6978	3.801	12	54.3667	5.89169	12
	1104	12.9789	3.83162	12	54.3711	5.88996	12
	1108	12.9811	3.81404	12	54.3733	5.97061	12
	1112	12.9811	3.81404	12	54.3748	6.02759	12
	1116	12.9722	3.90955	12	54.3789	6.03532	12
	1120	13.2444	4.04539	12	54.383	6.06135	12
	1124	13.7956	4.17465	12	54.387	6.10544	12
	1128	14.6256	4.3577	12	54.6752	6.15701	12
	1132	15.1833	4.41269	12	54.9633	6.23078	12
	1136	15.19	4.28898	12	55.2515	6.32597	12
	1140	14.9178	4.12006	12	55.8196	6.31302	12
	1144	14.6456	3.96418	12	56.1037	6.30136	12
	1148	14.9244	3.99618	12	56.663	6.33893	12
	1152	15.7593	4.0492	12	57.7781	6.41249	12
	1156	16.8719	4.09959	12	59.4504	6.35874	12
	1160	17.9844	4.16841	12	60.847	6.22367	12
	1164	18.5393	4.14258	12	61.4041	6.11647	12
	1168	18.8081	4.24227	12	61.1307	6.12431	12
	1172	19.637	4.38439	12	61.4141	6.09017	12
	1176	20.1937	4.43098	12	62.53	6.03165	12
	1180	20.4781	4.39919	12	63.0893	6.04802	12
	1184	20.2048	4.26918	12	63.65	5.96949	12
	1188	19.9315	4.15479	12	64.4878	5.90496	12
	1192	19.937	4.08859	12	65.6007	5.89867	12
	1196	19.9426	4.03535	12	66.4444	5.80468	12
	1200	20.2204	4.08604	12	67.2881	5.73024	12
	1204	20.4981	4.14226	12	67.8444	5.62151	12
	1208	20.2248	4.04359	12	68.1167	5.54381	12
	1212	19.1148	3.82687	12	68.673	5.52259	12
	1216	18.0048	3.61722	12	69.5133	5.48409	12
	1220	17.4515	3.55248	12	70.0696	5.40758	12
	1224	17.4581	3.55686	12	70.3493	5.36569	12
	1228	18.0159	3.70865	12	70.913	5.29242	12
	1232	17.7348	3.72577	12	71.473	5.1531	12
	1236	17.7348	3.71453	12	72.313	5.00317	12
	1240	17.4626	3.64983	12	73.153	4.87376	12
	1244	16.9115	3.52503	12	73.1519	4.93273	12
	1248	16.3604	3.40936	12	73.1507	5.01372	12
	1252	16.0863	3.30026	12	73.4337	5.06092	12
	1256	16.3633	3.30485	12	73.4363	5.12556	12
	1260	16.9126	3.36849	12	73.1585	5.20732	12
	1264	17.1848	3.42613	12	72.3293	5.25598	12
	1268	17.737	3.44842	12	71.5	5.31604	12
	1272	17.4611	3.36609	12	70.9444	5.30482	12
	1276	16.9141	3.20012	12	70.1085	5.39238	12
	1280	16.6393	3.12476	12	69.5567	5.44841	12
	1284	16.6456	3.12627	12	69.2852	5.42544	12
	1288	16.6489	3.15523	12	69.57	5.41774	12
	1292	16.3711	3.20318	12	69.5733	5.50869	12
	1296	16.0911	3.27906	12	69.2967	5.51275	12
	1300	16.3644	3.447	12	69.297	5.44237	12
	1304	16.9167	3.64726	12	69.8567	5.37353	12
	1308	17.4689	3.86411	12	70.693	5.3017	12
	1312	18.2919	4.05788	12	71.2574	5.19036	12
	1316	18.8426	4.19297	12	71.5378	5.0959	12
	1320	18.8422	4.15479	12	71.8181	5.00471	12
	1324	18.8433	4.22593	12	72.6559	4.78823	12
	1328	19.1167	4.37895	12	73.7778	4.56193	12
	1332	20.2267	4.47213	12	74.3459	4.45418	12
	1336	21.3456	4.4625	12	74.637	4.44935	12
	1340	22.1833	4.46146	12	74.6485	4.47605	12
	1344	22.74	4.52004	12	75.2063	4.29064	12
	1348	22.7456	4.42073	12	75.48	4.11968	12
	1352	23.5819	4.37236	12	75.4733	4.04022	12
	1356	24.4181	4.35117	12	74.9096	4.03655	12
	1360	25.2559	4.41654	12	74.3459	4.04407	12
	1364	25.8148	4.41776	12	74.6233	3.98387	12
	1368	26.6459	4.47644	12	74.9007	3.95684	12
	1372	27.2	4.58701	12	75.4507	3.77157	12
	1376	28.033	4.78628	12	76.2811	3.58826	12
	1380	28.3159	4.92386	12	77.1115	3.42924	12
	1384	28.8759	5.0183	12	78.497	3.25989	12
	1388	29.437	5.12462	12	79.8826	3.10725	12
	1392	30.2704	5.29827	12	80.9978	3.1173	12
	1396	30.8248	5.40783	12	81.8363	3.16512	12
	1400	30.8281	5.40276	12	82.6678	3.11019	12
	1404	30.8293	5.4876	12	83.4993	3.09247	12
	1408	31.1104	5.53038	12	84.3352	3.13346	12
	1412	31.3904	5.53374	12	84.8959	3.15271	12
	1416	31.6693	5.37717	12	85.1759	3.28632	12
	1420	31.9481	5.23111	12	85.4559	3.43932	12
	1424	31.9504	5.16429	12	85.7359	3.60925	12
	1428	32.2326	5.05587	12	85.7393	3.77545	12
	1432	32.2441	4.99038	12	85.7393	3.77545	12
	1436	32.5278	5.01009	12	86.0233	3.77123	12
	1440	33.3693	5.21833	12	86.3074	3.77351	12
	1444	34.487	5.34346	12	86.3144	3.92409	12
	1448	35.6048	5.4791	12	86.0374	4.06732	12
	1452	36.1637	5.60261	12	86.5911	3.94029	12
	1456	36.7137	5.73258	12	87.1448	3.82076	12
	1460	37.5448	5.86887	12	87.9781	3.6764	12
	1464	37.8248	5.85906	12	88.8189	3.46756	12
	1468	37.8248	5.85906	12	89.6596	3.26427	12
	1472	37.273	5.85307	12	90.2233	3.21691	12
	1476	36.9933	5.91713	12	90.787	3.1831	12
	1480	36.7067	5.92557	12	91.3507	3.16326	12
	1484	36.6989	5.98351	12	91.9144	3.15766	12
	1488	36.4211	5.98025	12	92.4781	3.16637	12
	1492	36.4141	5.92999	12	92.4852	3.32972	12
	1496	36.4059	5.84712	12	92.7693	3.34206	12
	1500	36.3944	5.73394	12	93.0533	3.36167	12
	1504	36.1122	5.67647	12	93.3337	3.36617	12
	1508	35.5489	5.63526	12	93.6141	3.37815	12
	1512	35.8185	5.59164	12	93.8911	3.21799	12
	1516	36.647	5.53207	12	93.8911	3.21799	12
	1520	37.4733	5.51231	12	94.1752	3.21399	12
	1524	38.2996	5.51514	12	94.4593	3.21762	12
	1528	39.1363	5.53861	12	94.4593	3.21762	12
	1532	39.9707	5.49438	12	94.4596	3.03895	12
	1536	40.5363	5.4734	12	94.46	2.8697	12
	1540	40.2641	5.50961	12	94.1833	2.87012	12
	1544	39.9885	5.51326	12	93.6226	2.86018	12
	1548	39.7141	5.5706	12	93.0619	2.86624	12
	1552	40.273	5.65155	12	92.5011	2.8882	12
	1556	40.8319	5.7491	12	91.6607	2.91512	12
	1560	40.8319	5.79149	12	90.8204	2.96358	12
	1564	40.5541	5.78448	12	90.2596	3.02827	12
	1568	40.2763	5.79161	12	89.6989	3.1064	12
	1572	39.7207	5.74862	12	88.8611	3.32303	12
	1576	39.1652	5.72371	12	88.0233	3.54282	12
	1580	38.3285	5.68606	12	87.7463	3.66925	12
	1584	37.7641	5.72928	12	87.4693	3.79828	12
	1588	37.4796	5.73931	12	87.1922	3.92966	12
	1592	37.4763	5.79171	12	87.4693	3.79828	12
	1596	37.2007	5.78996	12	87.7463	3.66925	12
	1600	37.4896	5.74125	12	87.7463	3.66925	12
	1604	37.7785	5.70572	12	87.7463	3.66925	12
	1608	37.5063	5.66985	12	87.7463	3.66925	12
	1612	37.2411	5.70701	12	87.7463	3.66925	12
	1616	37.5281	5.65765	12	87.4693	3.79828	12
	1620	38.0963	5.63426	12	87.1922	3.92966	12
	1624	38.9363	5.68964	12	86.9152	4.06317	12
	1628	39.7752	5.70898	12	86.6381	4.1986	12
	1632	39.7811	5.72385	12	86.6381	4.1986	12
	1636	38.9504	5.77523	12	86.6385	4.11608	12
	1640	38.4007	5.89597	12	86.6389	4.04645	12
	1644	38.6889	5.97746	12	86.3622	4.11307	12
	1648	38.6867	5.93714	12	86.0856	4.18484	12
	1652	38.41	5.94537	12	86.0852	4.23831	12
	1656	38.4056	6.02106	12	86.3619	4.17453	12
	1660	39.5189	6.13635	12	86.9156	3.98523	12
	1664	40.9122	6.26176	12	87.7533	3.77071	12
	1668	41.7433	6.39658	12	88.5911	3.5596	12
	1672	42.0211	6.3612	12	89.1519	3.4907	12
	1676	41.4589	6.25775	12	89.9922	3.438	12
	1680	40.8967	6.20597	12	90.8326	3.40344	12
	1684	40.6133	6.1724	12	91.3933	3.37029	12
	1688	40.0522	6.12007	12	91.9541	3.35052	12
	1692	39.49	6.0912	12	92.2404	3.33213	12
	1696	38.9278	6.06988	12	92.5267	3.33764	12
	1700	38.6467	6.02178	12	91.9681	3.32129	12
	1704	38.9256	6.04517	12	91.4096	3.31928	12
	1708	39.2044	6.07261	12	91.1256	3.31248	12
	1712	39.4833	6.10406	12	90.5644	3.46689	12
	1716	39.7622	6.13944	12	90.0033	3.62685	12
	1720	39.7544	6.20493	12	89.7193	3.6391	12
	1724	40.0267	6.2768	12	89.7122	3.508	12
	1728	40.8578	6.391	12	89.7052	3.38864	12
	1732	41.4111	6.48852	12	89.6981	3.28231	12
	1736	41.4122	6.51809	12	89.6911	3.19032	12
	1740	41.4133	6.56429	12	89.6841	3.11393	12
	1744	40.5767	6.50705	12	89.677	3.05432	12
	1748	40.0211	6.47883	12	89.393	3.13059	12
	1752	39.4656	6.46596	12	88.8319	3.33048	12
	1756	38.6267	6.41812	12	88.5474	3.53724	12
	1760	37.5156	6.29642	12	88.263	3.75437	12
	1764	36.4033	6.20545	12	88.5326	3.74673	12
	1768	35.5711	6.12094	12	88.8022	3.76053	12
	1772	35.2889	6.12178	12	88.8022	3.76053	12
	1776	34.7278	6.08988	12	88.5252	3.86864	12
	1780	34.1644	6.0392	12	88.2481	3.98031	12
	1784	34.1611	5.99335	12	87.9711	4.09526	12
	1788	34.7159	5.85983	12	87.6941	4.21322	12
	1792	34.4407	5.70984	12	87.6941	4.21322	12
	1796	34.7285	5.69335	12	87.6941	4.21322	12
	1800	35.5774	5.667	12	87.6941	4.21322	12
	1804	36.4196	5.67388	12	87.6941	4.21322	12
	1808	37.2585	5.66164	12	87.6941	4.21322	12
	1812	38.3763	5.63517	12	87.9685	4.20821	12
	1816	39.7648	5.54748	12	88.243	4.20946	12
	1820	40.8733	5.51613	12	88.8015	4.13163	12
	1824	41.1511	5.47963	12	89.36	4.06407	12
	1828	41.71	5.46188	12	89.6441	3.98738	12
	1832	42.2689	5.45255	12	89.9281	3.91547	12
	1836	42.8267	5.47607	12	90.2122	3.84859	12
	1840	43.3844	5.50797	12	90.4963	3.78701	12
	1844	43.3811	5.44638	12	90.7804	3.73099	12
	1848	43.6578	5.34596	12	91.0644	3.6808	12
	1852	44.2122	5.24988	12	91.0715	3.78569	12
	1856	44.2089	5.14165	12	91.0785	3.90236	12
	1860	43.9256	5.10016	12	91.0856	4.0298	12
	1864	45.0296	5.11892	12	91.3696	4.01038	12
	1868	46.1348	5.16881	12	91.9307	3.83932	12
	1872	47.24	5.24281	12	92.4919	3.67224	12
	1876	48.6356	5.29529	12	93.053	3.50973	12
	1880	50.3033	5.41319	12	93.6141	3.35244	12
	1884	51.1344	5.45362	12	93.8981	3.36185	12
	1888	51.6844	5.54001	12	94.1822	3.3785	12
	1892	52.233	5.47172	12	94.4593	3.21762	12
	1896	53.0604	5.48111	12	94.7363	3.05674	12
	1900	53.0581	5.44397	12	95.0133	2.89586	12
	1904	53.057	5.28197	12	95.2904	2.73498	12
	1908	52.5033	5.25514	12	95.2904	2.73498	12
	1912	52.2093	5.31182	12	95.2904	2.73498	12
	1916	52.47	5.28359	12	95.2904	2.73498	12
	1920	52.1822	5.31007	12	95.5674	2.57409	12
	1924	51.6222	5.28149	12	95.8444	2.41321	12
	1928	51.0622	5.27201	12	96.1215	2.25233	12
	1932	51.0578	5.37061	12	96.3985	2.09145	12
	1936	51.0637	5.52347	12	96.6756	1.93057	12
	1940	51.3496	5.65562	12	96.6756	1.93057	12
	1944	51.9063	5.77248	12	96.6756	1.93057	12
	1948	52.1819	5.91047	12	96.6756	1.93057	12
	1952	52.1785	5.99966	12	96.6756	1.93057	12
	1956	52.1763	5.98111	12	96.6756	1.93057	12
	1960	52.1741	5.97201	12	96.9526	1.76969	12
	1964	52.4541	5.89103	12	96.9526	1.76969	12
	1968	52.7319	5.89145	12	96.9526	1.76969	12
	1972	52.1741	5.91259	12	97.2296	1.60881	12
	1976	51.8996	5.95656	12	97.5067	1.44793	12
	1980	52.4607	5.99022	12	97.7837	1.28705	12
	1984	52.4711	6.03937	12	97.7837	1.28705	12
	1988	52.4711	6.04243	12	97.5067	1.44793	12
	1992	52.4711	6.05437	12	97.2296	1.60881	12
	1996	52.47	6.06682	12	97.2296	1.60881	12
	2000	52.4711	6.01995	12	97.2296	1.60881	12
	2004	52.4722	5.99091	12	97.2296	1.60881	12
	2008	53.0252	5.95331	12	96.9526	1.76969	12
	2012	53.3044	5.94777	12	96.6756	1.93057	12
	2016	53.5848	5.95141	12	96.3985	2.09145	12
	2020	53.5811	5.91422	12	96.1215	2.25233	12
	2024	53.3033	5.90432	12	96.1215	2.25233	12
	2028	53.3011	5.88229	12	96.3985	2.09145	12
	2032	53.5893	5.88387	12	96.6756	1.93057	12
	2036	53.8726	5.83093	12	96.6756	1.93057	12
	2040	54.7004	5.64797	12	96.3985	2.09145	12
	2044	54.9763	5.50092	12	96.1215	2.25233	12
	2048	54.9763	5.4827	12	95.8444	2.41321	12
	2052	54.4207	5.48588	12	95.5674	2.57409	12
	2056	54.1337	5.44778	12	95.5674	2.57409	12
	2060	54.1237	5.37033	12	95.8444	2.41321	12
	2064	54.123	5.32671	12	96.1215	2.25233	12
	2068	54.1263	5.36974	12	96.3985	2.09145	12
	2072	54.4085	5.47194	12	96.6756	1.93057	12
	2076	54.4107	5.53521	12	96.9526	1.76969	12
	2080	54.6907	5.60134	12	96.9526	1.76969	12
	2084	54.6896	5.58231	12	96.9526	1.76969	12
	2088	54.6815	5.52298	12	96.9526	1.76969	12
	2092	55.5111	5.50063	12	96.9526	1.76969	12
	2096	56.8944	5.42333	12	96.9526	1.76969	12
	2100	57.7222	5.43264	12	96.9526	1.76969	12
	2104	58.55	5.46317	12	96.9526	1.76969	12
	2108	58.827	5.53077	12	97.2296	1.60881	12
	2112	59.1041	5.61178	12	97.5067	1.44793	12
	2116	59.653	5.66674	12	97.5067	1.44793	12
	2120	60.4796	5.64889	12	97.5067	1.44793	12
	2124	60.7585	5.67449	12	97.5067	1.44793	12
	2128	60.7667	5.71585	12	97.7837	1.28705	12
	2132	60.5	5.80778	12	98.0607	1.12617	12
	2136	60.787	5.80724	12	98.3378	0.965286	12
	2140	62.1878	5.76707	12	98.6148	0.804405	12
	2144	63.5722	5.62824	12	98.6148	0.804405	12
	2148	64.1196	5.47646	12	98.6148	0.804405	12
	2152	64.667	5.33951	12	98.6148	0.804405	12
	2156	65.4974	5.24344	12	98.8919	0.643524	12
	2160	66.3319	5.20043	12	99.1689	0.482643	12
	2164	67.7181	5.15435	12	99.4459	0.321762	12
	2168	69.1119	5.07812	12	99.723	0.160881	12
	2172	70.5056	5.01765	12	100	0	12
	2176	71.0726	5.0004	12	100	0	12
	2180	71.3626	5.04182	12	100	0	12
	2184	71.9204	5.02558	12	100	0	12
	2188	72.753	4.97389	12	100	0	12
	2192	73.3085	4.95916	12	100	0	12
	2196	74.4148	4.93351	12	100	0	12
	2200	75.5204	4.86125	12	100	0	12
	2204	76.9059	4.81404	12	100	0	12
	2208	77.7396	4.79492	12	100	0	12
	2212	78.0226	4.80176	12	100	0	12
	2216	78.0296	4.83184	12	100	0	12
	2220	78.3074	4.82162	12	100	0	12
	2224	78.5852	4.81666	12	100	0	12
	2228	78.8652	4.84135	12	100	0	12
	2232	79.1452	4.871	12	100	0	12
	2236	79.4252	4.90552	12	100	0	12
	2240	79.4252	4.90552	12	100	0	12
	2244	79.973	4.84507	12	100	0	12
	2248	80.5207	4.79375	12	100	0	12
	2252	81.3463	4.77629	12	100	0	12
	2256	81.617	4.7812	12	100	0	12
	2260	81.333	4.77211	12	100	0	12
	2264	80.7781	4.80219	12	100	0	12
	2268	81.3374	4.83245	12	100	0	12
	2272	81.8967	4.88346	12	100	0	12
	2276	81.9	4.94384	12	100	0	12
	2280	81.3422	4.95796	12	100	0	12
	2284	80.7844	4.98135	12	100	0	12
	2288	80.7793	5.0295	12	100	0	12
	2292	80.7741	5.09997	12	100	0	12
	2296	81.323	5.167	12	100	0	12
	2300	81.5907	5.23171	12	99.4415	0.218576	12
	2304	81.5815	5.32118	12	98.883	0.437153	12
	2308	81.5744	5.40522	12	98.3244	0.655729	12
	2312	81.8444	5.4979	12	97.7659	0.874305	12
	2316	81.8437	5.58688	12	97.2074	1.09288	12
	2320	81.5659	5.67475	12	96.6489	1.31146	12
	2324	81.2881	5.7657	12	96.3648	1.42135	12
	2328	81.2915	5.87449	12	96.3648	1.42135	12
	2332	81.2948	5.99094	12	96.3648	1.42135	12
	2336	81.0211	5.973	12	96.0807	1.53936	12
	2340	80.7474	5.969	12	95.5222	1.75574	12
	2344	80.4737	5.97898	12	94.9637	1.97261	12
	2348	80.4759	5.85324	12	94.6796	2.09322	12
	2352	80.4781	5.73475	12	94.3956	2.21834	12
	2356	80.4781	5.49077	12	94.1115	2.34725	12
	2360	80.48	5.28034	12	93.8274	2.47936	12
	2364	80.4819	5.08373	12	93.5433	2.61418	12
	2368	80.7637	4.90291	12	93.2593	2.75131	12
	2372	81.3226	4.70195	12	92.9752	2.89043	12
	2376	81.8815	4.50239	12	92.9752	2.89043	12
	2380	82.1626	4.41998	12	92.9752	2.89043	12
	2384	82.4437	4.34203	12	92.6981	2.87026	12
	2388	82.4541	4.24983	12	92.4211	2.85902	12
	2392	82.7422	4.04592	12	92.4211	2.85902	12
	2396	83.3011	3.85728	12	92.4211	2.85902	12
	2400	84.14	3.67194	12	92.4211	2.85902	12
	2404	84.9789	3.49455	12	92.4211	2.85902	12
	2408	85.8148	3.26792	12	92.4211	2.85902	12
	2412	86.6507	3.04539	12	92.4211	2.85902	12
	2416	87.2096	2.8657	12	92.4211	2.85902	12
	2420	88.0496	2.71529	12	92.9796	2.65792	12
	2424	88.8896	2.5801	12	93.5381	2.45981	12
	2428	89.4485	2.41889	12	94.0967	2.26546	12
	2432	90.0074	2.26684	12	94.6552	2.07595	12
	2436	90.5663	2.1259	12	95.2137	1.8927	12
	2440	90.8544	2.02072	12	95.7722	1.71775	12
	2444	90.8648	2.06034	12	96.0563	1.56671	12
	2448	91.1459	2.07728	12	96.0563	1.56671	12
	2452	91.6978	2.06966	12	96.0563	1.56671	12
	2456	92.2456	1.9716	12	96.3404	1.4169	12
	2460	92.5226	1.90901	12	96.8989	1.25036	12
	2464	92.7996	1.85878	12	97.4574	1.10216	12
	2468	93.0785	1.85265	12	97.7415	0.953301	12
	2472	93.3574	1.86008	12	98.0256	0.80739	12
	2476	93.6363	1.88093	12	98.3096	0.666372	12
	2480	93.9133	1.83952	12	98.5937	0.534139	12
	2484	94.4704	1.79903	12	98.8778	0.419088	12
	2488	94.7474	1.78514	12	99.1619	0.339181	12
	2492	94.7474	1.78514	12	99.4459	0.321762	12
	2496	94.7474	1.78514	12	99.4459	0.321762	12
	2500	95.3022	1.64002	12	99.4459	0.321762	12
	2504	95.857	1.51248	12	99.723	0.160881	12
	2508	96.4056	1.32185	12	100	0	12
	2512	96.6763	1.29043	12	100	0	12
	2516	96.6763	1.29043	12	100	0	12
	2520	96.6763	1.29043	12	100	0	12
	2524	96.6763	1.29043	12	100	0	12
	2528	96.6763	1.29043	12	100	0	12
	2532	96.6763	1.29043	12	100	0	12
	2536	96.6763	1.29043	12	100	0	12
	2540	96.6763	1.29043	12	99.3907	0.232727	12
	2544	96.6763	1.29043	12	98.7815	0.465453	12
	2548	96.6763	1.29043	12	98.4713	0.592005	12
	2552	96.6763	1.29043	12	98.4713	0.592005	12
	2556	96.6763	1.29043	12	98.4713	0.592005	12
	2560	96.67	1.27042	12	98.4713	0.592005	12
	2564	96.9415	1.14884	12	98.1722	0.69818	12
	2568	96.9422	1.05191	12	97.5678	0.809869	12
	2572	96.943	1.00351	12	96.9633	0.964837	12
	2576	96.9437	1.01064	12	96.6643	1.11344	12
	2580	97.2215	0.935287	12	96.3652	1.26957	12
	2584	97.4993	0.882571	12	96.3652	1.26957	12
	2588	97.777	0.85668	12	96.3652	1.26957	12
	2592	98.0548	0.86004	12	96.3652	1.26957	12
	2596	98.3348	0.824738	12	96.3652	1.26957	12
	2600	98.3441	0.815037	12	96.3652	1.26957	12
	2604	98.0733	0.844153	12	96.0627	1.25959	12
	2608	98.0733	0.844153	12	95.7602	1.27424	12
	2612	98.0733	0.844153	12	95.7602	1.27424	12
	2616	98.0733	0.844153	12	95.7602	1.27424	12
	2620	98.0733	0.844153	12	95.7602	1.27424	12
	2624	98.0733	0.844153	12	95.4611	1.4311	12
	2628	98.0733	0.844153	12	95.162	1.59237	12
	2632	97.8026	0.90286	12	94.863	1.75684	12
	2636	97.5319	0.985887	12	94.5639	1.92368	12
	2640	97.5319	0.985887	12	94.5639	1.92368	12
	2644	97.5319	0.985887	12	94.2537	1.95086	12
	2648	97.5319	0.985887	12	93.9435	1.99256	12
	2652	97.5319	0.985887	12	93.6333	2.04791	12
	2656	97.5319	0.985887	12	93.3231	2.11582	12
	2660	97.5319	0.985887	12	93.6222	1.97251	12
	2664	97.5319	0.985887	12	93.9213	1.83523	12
	2668	97.5319	0.985887	12	93.9213	1.83523	12
	2672	97.2541	0.976519	12	93.3057	1.92804	12
	2676	96.9763	0.992978	12	92.6902	2.04186	12
	2680	96.9756	0.931954	12	92.0746	2.17339	12
	2684	97.2526	0.849398	12	91.7581	2.23271	12
	2688	97.5296	0.792487	12	91.747	2.28554	12
	2692	97.8067	0.76695	12	92.0461	2.22745	12
	2696	98.0837	0.775891	12	92.0398	2.23627	12
	2700	98.0837	0.775891	12	92.0335	2.27651	12
	2704	98.0837	0.775891	12	91.7233	2.41166	12
	2708	98.0837	0.775891	12	91.4131	2.55124	12
	2712	98.0837	0.775891	12	91.103	2.69456	12
	2716	98.0837	0.775891	12	90.7928	2.84107	12
	2720	98.3544	0.65366	12	90.4826	2.9903	12
	2724	98.6252	0.553887	12	90.4749	3.14513	12
	2728	98.6252	0.553887	12	90.4672	3.31207	12
	2732	98.6252	0.553887	12	89.858	3.47801	12
	2736	98.3474	0.688827	12	89.2487	3.65124	12
	2740	98.0696	0.832449	12	88.9385	3.80658	12
	2744	97.7919	0.980948	12	88.6251	3.92219	12
	2748	97.7919	0.980948	12	88.3117	4.05869	12
	2752	98.0626	0.954562	12	87.9982	4.21403	12
	2756	98.0626	0.954562	12	87.6848	4.38623	12
	2760	97.7919	0.980948	12	86.7698	4.5357	12
	2764	97.7919	0.980948	12	86.165	4.5347	12
	2768	97.7919	0.980948	12	85.8704	4.387	12
	2772	97.7919	0.980948	12	85.8782	4.25376	12
	2776	97.7919	0.980948	12	85.8861	4.13291	12
	2780	97.7919	0.980948	12	85.894	4.02557	12
	2784	97.7919	0.980948	12	85.5917	4.07614	12
	2788	97.5211	1.03324	12	85.2894	4.13367	12
	2792	97.5281	0.98386	12	85.2924	4.17579	12
	2796	97.8059	0.871547	12	85.2955	4.23285	12
	2800	98.0837	0.775891	12	84.9931	4.31081	12
	2804	97.8067	0.76695	12	84.6908	4.39452	12
	2808	97.5296	0.792487	12	84.6908	4.39452	12
	2812	97.2526	0.849398	12	84.3806	4.52728	12
	2816	96.9756	0.931954	12	83.7714	4.64217	12
	2820	96.6985	1.03403	12	83.1621	4.76566	12
	2824	96.6985	1.03403	12	82.8568	4.77301	12
	2828	96.4278	1.12478	12	82.5514	4.78674	12
	2832	96.157	1.23098	12	81.9469	4.79666	12
	2836	96.157	1.23098	12	81.3425	4.81764	12
	2840	96.157	1.23098	12	81.0371	4.84837	12
	2844	96.157	1.23098	12	81.0419	4.75854	12
	2848	96.157	1.23098	12	80.7477	4.68255	12
	2852	96.157	1.23098	12	80.7525	4.61928	12
	2856	96.4348	1.20091	12	80.7573	4.57027	12
	2860	96.7126	1.19159	12	80.7621	4.53598	12
	2864	96.9904	1.20348	12	80.7591	4.53823	12
	2868	96.7196	1.32964	12	80.756	4.55476	12
	2872	96.4489	1.46348	12	81.0631	4.4884	12
	2876	96.7196	1.32964	12	81.3703	4.44256	12
	2880	96.9904	1.20348	12	81.6808	4.44069	12
	2884	96.9904	1.20348	12	81.9914	4.4748	12
	2888	96.9904	1.20348	12	82.5962	4.46552	12
	2892	96.9904	1.20348	12	82.8985	4.43502	12
	2896	96.9904	1.20348	12	82.9018	4.43854	12
	2900	96.9904	1.20348	12	82.905	4.45762	12
	2904	96.9904	1.20348	12	83.2184	4.41848	12
	2908	97.2611	1.08768	12	83.5319	4.40128	12
	2912	97.5319	0.985887	12	84.1444	4.34463	12
	2916	97.5319	0.985887	12	84.7569	4.29954	12
	2920	97.5319	0.985887	12	85.0655	4.25833	12
	2924	97.8089	0.870143	12	85.3741	4.24173	12
	2928	98.0859	0.771973	12	85.3804	4.21513	12
	2932	98.363	0.698824	12	85.3867	4.20531	12
	2936	98.64	0.659079	12	85.6857	4.11015	12
	2940	98.917	0.658813	12	85.9848	4.02061	12
	2944	98.917	0.658813	12	85.6857	4.11015	12
	2948	99.1878	0.494109	12	85.3867	4.20531	12
	2952	99.4585	0.329406	12	85.6857	4.11015	12
	2956	99.4585	0.329406	12	85.9848	4.02061	12
	2960	99.4585	0.329406	12	85.6857	4.11015	12
	2964	99.4585	0.329406	12	85.0765	4.26656	12
	2968	99.4585	0.329406	12	84.7629	4.2219	12
	2972	99.4585	0.329406	12	84.4493	4.20102	12
	2976	99.4585	0.329406	12	84.1356	4.20426	12
	2980	99.4585	0.329406	12	83.523	4.29543	12
	2984	99.4585	0.329406	12	83.5258	4.21376	12
	2988	99.7293	0.164703	12	83.5287	4.1464	12
	2992	100	0	12	82.916	4.26926	12
	2996	100	0	12	82.6058	4.37222	12
	3000	100	0	12	82.5947	4.42044	12
	3004	100	0	12	82.5836	4.48338	12
	3008	100	0	12	81.9681	4.67454	12
	3012	99.7293	0.164703	12	81.2928	4.88124	12
	3016	99.4585	0.329406	12	81.2516	4.97542	12
	3020	99.1878	0.494109	12	80.8698	5.0408	12
	3024	99.1878	0.494109	12	80.4879	5.12685	12
	3028	99.1878	0.494109	12	79.778	5.24164	12
	3032	99.1878	0.494109	12	78.4372	5.39895	12
	3036	99.1878	0.494109	12	77.0964	5.57017	12
	3040	99.1878	0.494109	12	77.0374	5.58106	12
	3044	99.1878	0.494109	12	77.3064	5.57293	12
	3048	99.1878	0.494109	12	77.5754	5.57087	12
	3052	99.1878	0.494109	12	77.5126	5.60411	12
	3056	99.1878	0.494109	12	77.4561	5.59659	12
	3060	99.1878	0.494109	12	77.3996	5.60261	12
	3064	99.1878	0.494109	12	77.6421	5.62002	12
	3068	99.1878	0.494109	12	77.5566	5.65083	12
	3072	99.1878	0.494109	12	77.1721	5.69847	12
	3076	99.1878	0.494109	12	77.1194	5.69595	12
	3080	99.1878	0.494109	12	77.6937	5.68025	12
	3084	99.1878	0.494109	12	78.2681	5.6746	12
	3088	98.917	0.658813	12	79.1862	5.45683	12
	3092	98.6463	0.823516	12	80.1042	5.24434	12
	3096	98.6463	0.823516	12	80.6943	5.05152	12
	3100	98.6463	0.823516	12	81.2843	4.87967	12
	3104	98.3756	0.988219	12	81.569	4.72006	12
	3108	98.1048	1.15292	12	81.8536	4.57921	12
	3112	98.1048	1.15292	12	82.7717	4.41046	12
	3116	98.1048	1.15292	12	83.3872	4.28558	12
	3120	98.1048	1.15292	12	84.0028	4.16927	12
	3124	98.1048	1.15292	12	84.6184	4.06226	12
	3128	97.8341	1.31763	12	84.9059	4.04084	12
	3132	97.8341	1.31763	12	85.2531	4.03738	12
	3136	98.1048	1.15292	12	85.5934	3.90379	12
	3140	98.3756	0.988219	12	85.9425	3.82734	12
	3144	98.3756	0.988219	12	85.9635	3.88566	12
	3148	98.3756	0.988219	12	86.6445	3.79234	12
	3152	98.3756	0.988219	12	87.6573	3.63999	12
	3156	98.3756	0.988219	12	88.67	3.50577	12
	3160	98.3756	0.988219	12	89.0103	3.41051	12
	3164	98.3756	0.988219	12	89.3505	3.32338	12
	3168	98.1048	1.15292	12	89.6908	3.24505	12
	3172	97.8341	1.31763	12	90.3629	3.10819	12
	3176	97.5541	1.30701	12	91.0349	2.98829	12
	3180	97.2741	1.31526	12	91.707	2.88745	12
	3184	97.0033	1.47577	12	92.3791	2.80772	12
	3188	96.7326	1.63712	12	93.3792	2.56671	12
	3192	96.1896	1.79001	12	94.3793	2.33975	12
	3196	95.6467	1.95568	12	94.7069	2.12052	12
	3200	95.1037	2.13117	12	94.7064	2.12647	12
	3204	94.5607	2.31422	12	94.706	2.16975	12
	3208	94.8315	2.15714	12	94.3653	2.20735	12
	3212	95.1022	2.00129	12	93.6896	2.22872	12
	3216	95.1022	2.00129	12	93.3419	2.11166	12
	3220	95.1022	2.00129	12	92.9942	2.04807	12
	3224	95.093	1.85468	12	92.9816	2.02009	12
	3228	95.0837	1.72959	12	92.9689	2.03188	12
	3232	94.8115	1.77621	12	92.6282	2.17431	12
	3236	94.2685	1.97159	12	92.2875	2.32359	12
	3240	93.7256	2.17163	12	91.9468	2.47847	12
	3244	93.1826	2.37516	12	91.6061	2.63798	12
	3248	92.9104	2.44854	12	91.5934	2.7353	12
	3252	92.9089	2.40635	12	91.5808	2.85769	12
	3256	92.6367	2.50006	12	91.2401	3.03507	12
	3260	92.0833	2.58967	12	91.2312	3.23302	12
	3264	91.53	2.69479	12	91.5504	3.41483	12
	3268	90.7059	2.91544	12	91.5377	3.58219	12
	3272	90.163	3.12789	12	91.525	3.7636	12
	3276	89.8907	3.23745	12	91.5124	3.95712	12
	3280	89.6185	3.351	12	91.4997	4.16107	12
	3284	89.3463	3.46817	12	91.159	4.34948	12
	3288	89.3448	3.50167	12	90.8183	4.53804	12
	3292	89.3433	3.55088	12	90.4776	4.72673	12
	3296	89.3511	3.68819	12	90.1369	4.91554	12
	3300	89.0881	3.9078	12	89.4644	5.07799	12
	3304	88.8159	4.04221	12	88.1195	5.20526	12
	3308	88.5437	4.17838	12	86.7747	5.34759	12
	3312	88.5437	4.17838	12	85.4298	5.50381	12
	3316	88.5437	4.17838	12	84.4257	5.48753	12
	3320	88.4848	4.10551	12	83.7618	5.48994	12
	3324	88.4258	4.04722	12	83.0978	5.50422	12
	3328	87.8239	4.1996	12	82.0937	5.52468	12
	3332	87.216	4.17427	12	81.7566	5.5618	12
	3336	86.608	4.16211	12	81.4195	5.62079	12
	3340	86.0076	4.30516	12	81.0824	5.70099	12
	3344	85.9904	4.48542	12	80.0758	5.72296	12
	3348	85.9732	4.67198	12	79.2888	5.75507	12
	3352	85.645	4.67969	12	78.873	5.82425	12
	3356	85.2919	4.69889	12	78.4571	5.90041	12
	3360	85.2419	4.71881	12	78.4198	5.92667	12
	3364	85.1919	4.73894	12	78.3825	5.95302	12
	3368	85.142	4.7593	12	78.3452	5.97946	12
	3372	84.8213	4.82693	12	77.9294	6.06167	12
	3376	84.5006	4.9003	12	77.5136	6.15024	12
	3380	84.461	4.96784	12	76.7294	6.25179	12
	3384	84.1182	5.04748	12	75.9451	6.36401	12
	3388	84.0461	5.07398	12	75.1609	6.48635	12
	3392	83.6929	5.10744	12	74.3767	6.61824	12
	3396	83.069	5.21234	12	73.5925	6.75913	12
	3400	82.445	5.32573	12	72.8083	6.90846	12
	3404	81.8211	5.4471	12	72.3925	7.0255	12
	3408	81.1972	5.57592	12	72.3552	7.04838	12
	3412	80.5732	5.71168	12	72.3179	7.07135	12
	3416	79.6438	5.81757	12	71.9161	7.05038	12
	3420	78.9851	5.85056	12	71.4677	7.08946	12
	3424	78.3264	5.89262	12	71.6916	7.03392	12
	3428	77.9732	5.96568	12	72.28	7.01774	12
	3432	77.62	6.04294	12	72.8683	7.00958	12
	3436	77.5625	6.04119	12	73.0922	6.98662	12
	3440	77.564	6.1187	12	72.9758	7.0723	12
	3444	77.5655	6.20584	12	73.2239	7.18841	12
	3448	77.567	6.30221	12	73.4398	7.16285	12
	3452	77.269	6.41961	12	73.4818	7.25024	12
	3456	76.9711	6.54909	12	73.5239	7.3424	12
	3460	76.6656	6.5373	12	73.566	7.43916	12
	3464	76.0568	6.60569	12	74.4273	7.43413	12
	3468	75.7536	6.68503	12	75.069	7.41869	12
	3472	76.354	6.4927	12	74.8548	7.49302	12
	3476	76.9446	6.22787	12	74.1664	7.54859	12
	3480	77.232	6.05174	12	73.0994	7.71861	12
	3484	77.2223	5.99704	12	72.0324	7.9009	12
	3488	77.2223	5.99704	12	70.489	8.01779	12
	3492	77.2223	5.99704	12	69.3242	8.03962	12
	3496	77.518	5.93712	12	68.6358	8.13892	12
	3500	77.8137	5.88212	12	67.8361	8.12551	12
	3504	77.8136	5.76842	12	67.0364	8.12256	12
	3508	77.8135	5.66423	12	66.2368	8.13009	12
	3512	78.1091	5.517	12	65.4371	8.14806	12
	3516	78.4025	5.41797	12	64.1611	8.10173	12
	3520	78.4003	5.37819	12	62.8851	8.07041	12
	3524	78.398	5.35029	12	61.2407	8.07226	12
	3528	78.091	5.30098	12	59.6941	8.24396	12
	3532	78.0895	5.22471	12	58.1476	8.42873	12
	3536	78.3936	5.12016	12	56.9654	8.60722	12
	3540	78.6976	5.03237	12	56.1618	8.70004	12
	3544			12			12
	3548			12			12
	3552			12			12
	3556			12			12
	3560			12			12
	3564			12			12
	3568			12			12
	3572			12			12
	3576			12			12
	3580			12			12
	3584			12			12
	3588			12			12
	3592			12			12
	3596			12			12
	3600			12			12
