# Supplementary material for: Microglia facilitate and stabilize the response to general anesthesia via modulating the neuronal network in a brain region-specific manner
Source: eLife. 2023 Dec 22;12:RP92252. doi: 10.7554/eLife.92252 (PMC10746144; doi:10.7554/eLife.92252)
Supplement: Figure 7—source data 1. [file elife-92252-fig7-data1.xlsx]

## Sheet: Figure 7B
	c-Fos+ cell density in LHb (normalized to CD)				c-Fos+ cell density in SON (normalized to CD)				c-Fos+ cell density in VLPO (normalized to CD)				c-Fos+ cell density in TRN (normalized to CD)
	CD	PLX5622	Statistical test		CD	PLX5622	Statistical test		CD	PLX5622	Statistical test		CD	PLX5622	Statistical test
	0.35852	0.34592	unpaired t test		0.894201	0	unpaired t test		1	0.93184	unpaired t test		0.77771	0.69881	unpaired t test
	1.64148	0.14669			1.1058	0.295421			1.03467	1.50662			1.22229	0.64457
	1.37081	1.4637			1.32783	0			0.965329	1.09579			1	1.92133
	0.629189	0.662461			0.67217	0.929067			0.647917	1.17496			2.06964	0.330555
	0.884776	0.443965			0.53826	0.554297			0.930185	0.698564			0.647485	0.421285
	1.11522	0.469428			1.46174				1.4219	0.468316			0.282874	0.704323
	1.17664	0.49629							0.645732	0.503774			1.24938	2.03404
	0.823363	0.670409							1.35427	0.390428			0.750617	1.24639
	1.63124	0.674036							1	0.496024			0.686291	0.812807
	0.388127									0.496024			0.919855	1.18762
	0.817762												1.41064
	1.16287												0.983211

## Sheet: Figure 7C
	c-Fos+ cell density in PVT (normalized to CD)				c-Fos+ cell density in LC (normalized to CD)				c-Fos+ cell density in LH (normalized to CD)				c-Fos+ cell density in VTA (normalized to CD)
	CD	PLX5622	Statistical test		CD	PLX5622	Statistical test		CD	PLX5622	Statistical test		CD	PLX5622	Statistical test
	1.10614	0.70989	unpaired t test		1.31203	2.72319	unpaired t test		0.83354	0.98371	unpaired t test		0.55214	0.271547	unpaired t test
	0.89386	1.37542			0.780717	1.56058			1.16646	4.85113			1.44786	4.95611
	0.993006	2.56017			0.90725	2.73516			1	7.94272			1.39553	4.11101
	1.00699	1.50341			0.64854	5.06202			1.19447	1.90132			0.379509	1.55726
	0.790146	1.22461			0.507788	4.93723			1.1086	2.22571			1.22496	0.577363
	1.18955	1.17177			1.84367				0.696932	0.671536			1.21653	0.836458
	1.0203	0.872163							0.990951	1.01482			0.78347	0.605382
	1	2.02807							1.00905	1.99229			0.882795	1.71735
	0.513897	1.51263							0.67207	0.893929			1.1172	1.17517
	0.940746								1.06241	0.962798			0.881282	0.920148
	0.856578								0.517722				1.13463	1.68457
	1.68878								1.7478				0.984085
