# Supplementary material for: Microglia facilitate and stabilize the response to general anesthesia via modulating the neuronal network in a brain region-specific manner
Source: eLife. 2023 Dec 22;12:RP92252. doi: 10.7554/eLife.92252 (PMC10746144; doi:10.7554/eLife.92252)
Supplement: Figure 8—source data 1. [file elife-92252-fig8-data1.xlsx]

## Sheet: Figure 8B
	c-Fos+ cell density in LHb (normalized to CD)				c-Fos+ cell density in SON (normalized to CD)				c-Fos+ cell density in VLPO (normalized to CD)				c-Fos+ cell density in TRN (normalized to CD)
	w/o saline	w/ saline	Statistical test		w/o saline	w/ saline	Statistical test		w/o saline	w/ saline	Statistical test		w/o saline	w/ saline	Statistical test
	0.606686	0.726405	unpaired t test		1.13109	1.14783	unpaired t test		0.468131	1.051	unpaired t test		1.37979	0.479777	unpaired t test
	1.86522	0.600006			0.85792	0.344087			1.62462	1.16271			0.9298	0.438663
	0.528089	0.818956			0.721599	1.01443			1.04763	1.04225			0.69041	1.22597
	1.06042	1.41431			1.28939	1.4312			0.946115	0.820382			1	1.02927
	0.939576	0.813892							1.05389	0.959501

## Sheet: Figure 8C
	c-Fos+ cell density in PVT (normalized to CD)				c-Fos+ cell density in LC (normalized to CD)				c-Fos+ cell density in LH (normalized to CD)				c-Fos+ cell density in VTA (normalized to CD)
	w/o saline	w/ saline	Statistical test		w/o saline	w/ saline	Statistical test		w/o saline	w/ saline	Statistical test		w/o saline	w/ saline	Statistical test
	1.12257	1.0916	unpaired t test		0.703825	1.87888	unpaired t test		0.860086	1.68973	unpaired t test		0.65506	1.00311	unpaired t test
	1.00182	1.28903			1.29617	1.16965			0.970381	1.29084			0.742539	1.10118
	0.875616	1.43272			1.09525	1.01789			1.16953	0.80881			1.6024	1.12479
	0.952895	1.20073			0.904749	1.17707			1.37664	0.76908			1.07035	1.11986
	1.04711	0.829391				1.58914			0.623356	0.69164			0.929652	2.20832
