# Supplementary material for: Microglia facilitate and stabilize the response to general anesthesia via modulating the neuronal network in a brain region-specific manner
Source: eLife. 2023 Dec 22;12:RP92252. doi: 10.7554/eLife.92252 (PMC10746144; doi:10.7554/eLife.92252)
Supplement: Figure 9—source data 1. [file elife-92252-fig9-data1.xlsx]

## Sheet: Figure 9B
	c-Fos+ cell in LHb (normalized to CD)				Fos+ cell in LHb (normalized to CD)				c-Fos+ Fos+ cell in LHb (normalized to CD)				c-Fos+ Fos- cell in LHb (normalized to CD)				c-Fos- Fos+ cell in LHb (normalized to CD)
	CD	PLX5622	Statistical test		CD	PLX5622	Statistical test		CD	PLX5622	Statistical test		CD	PLX5622	Statistical test		CD	PLX5622	Statistical test
	0.942059	0.265645	unpaired t test		1.48282	0.810885	unpaired t test		1.42976	0.45033	unpaired t test		0.70302	0.150502	unpaired t test		1.37026	0.785971	unpaired t test
	0.70979	0.035135			0.936842	0.083708			0.392219	0.006094			1.22309	0.074027			0.965795	0.091963
	1.20609	0.137317			1.07695	0.110891			0.664807	0			1.63106	0.313429			1.13821	0.123408
	0.670203	0.385541			0.557579	0.828799			0.934591	0.477722			0.583732	0.396441			0.63085	0.881832
	1.47186	0.442482			0.94581	0.835189			1.57862	1.11203			0.85909	1.04853			0.894885	1.00206
		0.076093				0.102583				0.12869				0.043421				0.088966
	c-Fos+ cell in SON (normalized to CD)				Fos+ cell in SON (normalized to CD)				c-Fos+ Fos+ cell in SON (normalized to CD)				c-Fos+ Fos- cell in SON (normalized to CD)				c-Fos- Fos+ cell in SON (normalized to CD)
	CD	PLX5622	Statistical test		CD	PLX5622	Statistical test		CD	PLX5622	Statistical test		CD	PLX5622	Statistical test		CD	PLX5622	Statistical test
	0.984226	0.197934	unpaired t test		0.36001	0.650224	unpaired t test		0.945917	0.386418	unpaired t test		0.983439	0.279554	unpaired t test		0.123915	0.80753	unpaired t test
	0.753293	0.406773			1.21323	0.255067			0.412331	0.398209			0.932139	0.54193			1.58935	0.351175
	1.38624	0.188431			1.21694	0.620318			1.07045	0			1.1081	0.25104			0.837736	0.854051
	1.1138	0.223652			1.83333	0.135012			0.439655	0.211331			1.11291	0.232397			2.10343	0.11153
	0.762433	0.17264			0.376492	0.113667			2.13165	0.263037			0.863401	0.0920011			0.345568	0
		0.0604771				0.331819				0.232493				0				0.366126

## Sheet: Figure 9C
	c-Fos+ cell in PVT (normalized to CD)				Fos+ cell in PVT (normalized to CD)				c-Fos+ Fos+ cell in PVT (normalized to CD)				c-Fos+ Fos- cell in PVT (normalized to CD)				c-Fos- Fos+ cell in PVT (normalized to CD)
	CD	PLX5622	Statistical test		CD	PLX5622	Statistical test		CD	PLX5622	Statistical test		CD	PLX5622	Statistical test		CD	PLX5622	Statistical test
	0.767056	1.38374	unpaired t test		1.42443	1.12173	unpaired t test		1.40271	1.25846	unpaired t test		0.107129	1.41835	unpaired t test		1.6026	0	unpaired t test
	1.03129	1.92636			0.729907	0.968285			0.700602	0.870305			1.28565	2.74493			0.970331	1.10126
	1.0537	1.66834			0.844807	0.756594			0.845682	0.630849			1.28531	2.39061			0.837618	0.312581
	1.42169	1.242			0.993797	0.49935			1.01745	0.439579			1.37693	1.80167			0.799726	0.634658
	0.726264	1.65094			1.00706	0.694936			1.03355	0.741312			0.944987	2.05158			0.789722	0.209628
		1.56652				0.684974				0.759518				2.37707				1.18679
	c-Fos+ cell in LC (normalized to CD)				Fos+ cell in LC (normalized to CD)				c-Fos+ Fos+ cell in LC (normalized to CD)				c-Fos+ Fos- cell in LC (normalized to CD)				c-Fos- Fos+ cell in LC (normalized to CD)
	CD	PLX5622	Statistical test		CD	PLX5622	Statistical test		CD	PLX5622	Statistical test		CD	PLX5622	Statistical test		CD	PLX5622	Statistical test
	0.460868	3.50532	unpaired t test		1.24431	3.4007	unpaired t test		1.46151	3.99431	unpaired t test		0.126359	2.50041	unpaired t test		0	0	unpaired t test
	1.50841	4.29342			0.558981	2.95355			0.525244	3.46273			2.58801	3.3702			0.564684	0
	1.26921	4.19417			0.856633	2.63746			0.932054	2.67412			1.04509	3.44464			1.56541	1.77947
	1.05945	2.83956			1.14355	1.81665			1.06854	1.06688			0.785708	2.45239			1.18096	4.58797
	0.702063	2.29674			1.19653	0.90517			1.01265	1.06317			0.45483	2.03163			1.68894	0
