# Supplementary material for: Microglia facilitate and stabilize the response to general anesthesia via modulating the neuronal network in a brain region-specific manner
Source: eLife. 2023 Dec 22;12:RP92252. doi: 10.7554/eLife.92252 (PMC10746144; doi:10.7554/eLife.92252)
Supplement: Figure 10—source data 1. [file elife-92252-fig10-data1.xlsx]

## Sheet: Figure 10C
	Stimulation current	eEPSC amplitude
		CD																					PLX5622																			Statistical test
	30	80.389	239.994	0	114.469	0	0	263.812	97.3746	195.112	80.2501	156.137	191.532	0	0	82.0538	0	34.8087	0	57.151	63.7941	0	51.8873	0	0	72.8828	123.952	42.6378	94.4278	87.4639	82.1742	0	0	353.217	96.6204	156.798	185.484	330.846	221.027	24.9599	0	Two-Way ANOVA
	40	118.179	389.847	253.679	228.991	121.311	93.8043	441.928	122.094	249.566	127.188	251.751	384.987	116.351	73.36	99.9885	86.9788	99.8681	45.6858	62.566	66.5606	0	118.09	42.9111	66.3293	106.446	40.2596	149.012		152.564	157.154	66.5492	282.209	291.72	150.966	188.457	277.972	203.509	219.898	48.6569	59.74
	50	153.532	456.103	472.534	215.183	109.001	102.697	582.407	141.83	191.626	157.975	224.929	434.833	150.559	142.788	63.1838	119.899	167.281	105.072	112.956	100.364	167.561	194.305	89.945	83.9413	180.353	64.2093	108.785	67.8855	154.513	194.945	69.6384	273.215	419.686	213.07	198.71	296.065	450.139	111.772	120.634	175.955
	60	215.07	429.936	575.227	473.532	125.313		539.795	185.75	369.036	175.685	246.845	458.4	312.449	176.965	89.9214	121.265	228.759	135.644	89.5635	108.066	174.487	192.432	159.394	135.182	197.285	169.299	153.654	80.1173	139.482	239.934	80.8716	359.558	428.044	257.943	171.001	331.405	499.476	402.63	117.631	348.116
	70	274.454	398.811	573.884	524.673	154.698	302.303	633.72	186.326	477.472	223.163	169.066	558.248	349.253	247.042	100.476	139.079	182.929	149.717	148.578	132.182	309.6	243.92	220.973	158.043	238.855	231.816	164.142	75.1303	179.059	275.792	121.8	314.362	461.319	258.106	139.886	286.878	523.194	335.197	182.744	442.221
	80	214.805	503.053	693.026	592.269	132.671	414.707	634.665	251.972	518.295	299.669	366.288	615.696	276.613	326.748	106.984	117.305	241.196	227.28	103.652	197.786	402.608	215.921	287.242	205.355	290.159	326.203	183.464	252.274	287.487	257.541	131.629	310.26	520.688	290.769	155.802	355.862	562.887	441.434	168.983	414.116
	90	258.361	391.299	698.938	599.287	156.088	488.424	600.739	240.393	587.128	292.012	382.942	665.453	357.178	376.02	183.756	140.108	69.4188	282.938	175.554	242.756	395.779	248.408	287.508	212.628	328.301	326.583	203.529	272.166	337.26	209.451	235.184	395.481	589.982	291.349	160.99	253.891	523.494	376.005	189.548	491.166
	100	243.983	513.486	632.946	601.036	148.245	446.955	620.653	238.92	566.669	321.681	385.557	765.519	287.204	316.042	128.7	125.58	176.597	276.626	163.691	279.598	393.703	256.379	264.365	259.533	298.44	443.884	229.506	251.769	379.039	212.586	236.86	414.352	612.427	297.443	166.527	254.838	520.563	324.024	200.102	582.495
	110	281.435	572.85	547.589	585.719	179.923	390.031	638.821	271.654	548.746	313.525	403.374	684.497	283.649	336.46	95.5808	145.577	192.886	252.469	143.173	300.267	363.221	247.742	252.058	227.579	270.93	492.051	282.811	234.807	412.523	215.893	245.219	409.715	645.685	284.934	190.747	286.337	501.734	374.879	271.461	645.034
	120	334.29	624.053	662.554	598.682	123.738	412.518	618.202	303.598	588.976	313.237	416.497	702.149	357.356	341.51	128.643	174.784	275.76	336.465	196.168	331.92	381.914		260.628	233.402	286.127	465.605	280.404	128.515	466.815	261.996	291.947	427.967	691.513	307.553	251.335	268.507	460.301	334.387	226.939	680.846
	130	310.076	708.7	972.613	535.449	89.682	363.147	599.916	301.49	606.702	269.009	430.811	768.374	378.929	343.35	178.702	166.685	295.32	322.546	159.064	323.576	364.483		259.004	182.971	307.827	408.759	320.969	145.002	415.667	228.15	290.787	437.735	703.348	319.586	291.396	256.227	418.004	293.092	206.368	761.687
	140	300.204	716.256	998.159	546.963	92.6357	360.662	587.504	358.445	580.515	272.5	423.233	662.903	336.758	352.976	110.312	180.179	293.39	361.153	215.687		399.133		272.426	188.893		347.691	320.303	119.86	425.132		370.289	414.389	743.136	331.647	196.307	275.932	412.159	287.497	201.268	692.043
	150	302.527	731.162	956.359	495.679	112.548	374.525	553.764	332.603	538.54	223.506	437.063	655.477	412.373	345.445	131.09	151.051	271.897	364.894			342.753		242.188	151.249		291.897	265.421		409.703		301.249	314.203	659.583	384.008	244.866	252.334	424.875	320.122	212.708	691.271
	Stimulation current	eIPSC amplitude
		CD																					PLX5622																			Statistical test
	30	0	273.417	0	100.537	0	0	573.88	48.2761	110.662	183.613	0	113.199	0	154.579	0	0	39.3974	0	41.1305	0	0	186.469	0	0	0	0	216.461	285.556	140.306	0	12.4266	0	160.05	65.8981	215.691	0	155.843	185.748	0	0	Two-Way ANOVA
	40	63.9219	396.8	98.7281	96.9677	216.821	13.1573	526.701	193.672	233.834	193.876	0	160.985	12.7919	123.674	0	0	11.5409	0	74.577	9.33515	69.497	113.816	85.2094	36.0442	142.499	0	151.886	640.511	180.131	31.8437	87.4639	72.2634	328.14	133.537	247.695	114.83	155.42	135.177	57.7043	97.8126
	50	111.142	346.253	56.6089	258.035	157.804	158.841	416.52	219.854	173.123	227.912	0	350.403	76.1809	312.297	0	63.3798	37.1136	0	296.571		25.2254	294.615	91.2724	232.908	148.24	79.5591	324.442	445.387	224.735	71.2734	50.4543	140.741	383.999	136.988	198.642	238.574	272.233	214.683	87.6959	238.384
	60	112.64	424.507	444.232	588.146	103.699	165.251	516.422	207.171	208.338	230.008	52.8038	526.096	143.433	349.791	40.2435	35.3768	32.9367	36.5405	241.339	10.4306	270.418	213.204	105.715	320.456	208.662	200.207	324.485	385.925	330.37	92.833	74.9417	99.9873	580.867	230.071	167.049	271.795	167.547	464.154	148.997	251.091
	70	264.018	231.245	463.535	491.469	205.648	173.024	529.355	232.778	361.54	344.251	67.9392	751.483	77.3633	435.088	31.0361	193.226	26.6111	100.405	276.84	95.6053	437.653	288.389	247.882	349.791	200.399	236.607	317.257	397.478	363.618	92.7602	79.7526	71.7858	602.225	250.444	198.337	259.799	224.555	493.035	169.638	285.468
	80	145.914	236.433	545.393	539.064	204.871	420.404	507.352	192.288	452.991	394.659	319.715	854.26	98.444	403.689	12.1487	124.603	58.8983	197.321	313.464	90.1174	646.071	229.13	166.363	313.85	256.705	235.34	301.337	805.974	356.226	147.566	102.644	83.3899	631.301	331.443	176.619	288.885	291.522	519.865	233.365	330.039
	90	289.38	268.443	369.934	449.03	28.8776	361.125	591.514	128.25	349.626	440.104	306.317	804.843	206.259	415.3	83.0239	187.762	34.578	273.007	395.93	177.981	735.9	415.651	185.791	328.793	238.693	193.624	329.35	682.312	371.382	140.299	118.535	313.108	729.44	361.453	256.119	351.275	407.81	454.785	283.33	399.754
	100	273.122	307.816	509.616	203.031	58.9994	237.537	643.095	161.888	359.652	341.044	310.508	962.49	260.375	362.715	65.65	283.82	151.107	320.325	325.734	192.145	642.2	422.549	144.694	292.511	300.451	209.873	225.219	721.057	362.508	136.369	64.696	262.301	722.639	403.105	141.857	407.514	426.468	351.562	227.145	564.274
	110	220.817	1013.41	539.042	215.637	88.7181	439.719	724.534	128.271	382.131	306.901	330.199	861.395	252.296	411.611	107.981	266.041	233.07	240.657	301.2	194.84	651.777	331.73	213.117	331.356	315.635	210.586	288.411	337.874	314.35	195.135	104.03	278.291	788.924	516.365	633.258	171.679	323.516	413.067	246.062	703.021
	120	294.043	949.321	614.319	174.101	74.479	432.365	525.586	153.228	424.937	177.398	359.622	897.512	238.757	374.845	130.283	242.419	258.877	341.323	396.166	175.706	725.63	287.522	267.99	285.924	313.724	122.209	262.15	158.402	267.109	195.59	158.876	297.065	693.454	400.84	536.115	537.618	349.081	364.879	201.84	683.317
	130	365.463	929.177	444.671	128.298	108.425	540.962	600.891	154.809	259.6	294.211	412.531	840.63	299.212	476.811	249.639	257.493	288.796	342.586	218.594	153.851	516.651	306.039	317.749	290.233	242.236	92.4732	339.121	288.174	322.607	192.528	188.628	220.025	798.956	475.257	539.612	472.485	228.141	338.937	213.315	817.18
	140	352.291	919.506	391.351	148.071	101.044	492.308	504.53	144.851	398.579	313.447	465.899	925.854	361.967	503.093	254.292	203.582	288.283	321.339	378.542	172.769	324.295	380.139	266.695	265.973	257.081	127.263	432.345	238.903	319.074	193.625	164.574	119.254	722.561	446.078	514.253	376.287	253.512	263.385	283.024	828.968
	150	379.816	1001.34	435.501	165.373	94.7639	489.383	607.918	178.363	331.482	299.598	398.799	954.256	349.217	586.244	247.777	210.765	351.771	329.876	331.588	126.789	305.574	329.999	251.315	254.765	349.251	92.5278	358.611		312.34	217.567	170.061	245.717	664.876	462.84	383.682	272.09	375.953	367.772	287.024	762.349

## Sheet: Figure 10D
	Stimulation current	E/I ratio
		CD																					PLX5622																			Statistical test
	30		0.877757		1.13858			0.4597	2.01704	1.76313	0.437061		1.692					0.883525		1.3895			0.278263					0.196977	0.330681	0.623378				2.20692	1.46621	0.72696		2.12295	1.18993			Two-Way ANOVA
	40	1.8488	0.982478	2.56947	2.36152	0.559498	7.12946	0.839049	0.630415	1.06728	0.656026		2.39145	9.09567	0.593173			8.65344		0.838945	7.1301		1.03755	0.503595	1.84022	0.746994		0.981078		0.846965	4.93515	0.760877	3.90529	0.889011	1.13052	0.760844	2.42072	1.30941	1.62674	0.843212	0.61076
	50	1.3814	1.31725	8.34734	0.833929	0.690741	0.646541	1.39827	0.645108	1.10688	0.693137		1.24095	1.97633	0.45722		1.89176	4.50727		0.380875		6.64257	0.659522	0.985457	0.360406	1.21663	0.807065	0.3353	0.152419	0.687534	2.73517	1.38023	1.94125	1.09293	1.55539	1.00034	1.24098	1.65351	0.520638	1.37559	0.738115
	60	1.90936	1.01279	1.29488	0.805128	1.20843		1.04526	0.896604	1.77133	0.763818	4.67476	0.871324	2.17837	0.505916	2.23443	3.42781	6.94542	3.71217	0.37111	10.3605	0.645248	0.902573	1.50777	0.421842	0.945476	0.845624	0.47353	0.207598	0.422198	2.58458	1.07913	3.59604	0.736904	1.12114	1.02366	1.21932	2.98112	0.867449	0.789488	1.38641
	70	1.03953	1.72463	1.23806	1.06756	0.752249	1.74718	1.19715	0.800443	1.32066	0.648257	2.48849	0.742862	4.51445	0.567799	3.23739	0.719777	6.87418	1.49113	0.536694	1.38258	0.707409	0.845802	0.891445	0.45182	1.1919	0.979751	0.517379	0.189018	0.492436	2.97317	1.52722	4.37917	0.766025	1.03059	0.705294	1.10423	2.32992	0.679865	1.07726	1.54911
	80	1.47214	2.12767	1.27069	1.0987	0.647582	0.986447	1.25094	1.31039	1.14416	0.759311	1.14567	0.720736	2.80985	0.809404	8.80619	0.941432	4.09512	1.15183	0.330666	2.19476	0.623163	0.94235	1.7266	0.654309	1.13032	1.38609	0.608832	0.313005	0.807035	1.74526	1.28238	3.72059	0.824786	0.877282	0.882139	1.23185	1.93085	0.849133	0.724114	1.25475
	90	0.89281	1.45766	1.88936	1.33462	5.40515	1.35251	1.0156	1.87442	1.6793	0.663507	1.25015	0.826811	1.7317	0.905419	2.21329	0.746198	2.0076	1.03638	0.443398	1.36395	0.537817	0.597637	1.54748	0.646692	1.37541	1.68668	0.61797	0.398888	0.908123	1.49289	1.98409	1.26308	0.808815	0.806047	0.628575	0.722772	1.28367	0.826775	0.669003	1.22867
	100	0.89331	1.66816	1.24201	2.96032	2.51265	1.88162	0.965104	1.47584	1.5756	0.943226	1.2417	0.795352	1.10304	0.871322	1.96039	0.442463	1.16869	0.863577	0.502529	1.45514	0.613053	0.606743	1.82706	0.88726	0.993305	2.11502	1.01904	0.349166	1.0456	1.5589	3.66112	1.57968	0.847487	0.737881	1.1739	0.625348	1.22064	0.921667	0.880945	1.03229
	110	1.27452	0.56527	1.01585	2.71623	2.02804	0.887001	0.881699	2.11782	1.43602	1.02158	1.22161	0.794638	1.12427	0.817421	0.88516	0.547199	0.827588	1.04908	0.475343	1.5411	0.557278	0.746818	1.18272	0.686811	0.858366	2.33658	0.980584	0.694953	1.31231	1.10638	2.35719	1.47226	0.818437	0.551807	0.301216	1.66786	1.55088	0.90755	1.10322	0.917517
	120	1.13688	0.657368	1.07852	3.43869	1.66138	0.954098	1.17622	1.98135	1.38603	1.76573	1.15815	0.782328	1.49674	0.91107	0.987412	0.721	1.06522	0.985767	0.495167	1.88907	0.52632		0.972526	0.81631	0.912033	3.8099	1.06963	0.811323	1.74765	1.33951	1.83757	1.44065	0.997202	0.767271	0.468808	0.499439	1.31861	0.916434	1.12435	0.996384
	130	0.848447	0.762718	2.18726	4.17349	0.82713	0.671297	0.998377	1.9475	2.33706	0.914341	1.04431	0.914046	1.26642	0.720097	0.71584	0.647341	1.02259	0.941504	0.727667	2.10318	0.705471		0.815121	0.630429	1.27077	4.4203	0.946474	0.503175	1.28846	1.18502	1.54158	1.98947	0.880334	0.672449	0.54001	0.542297	1.83222	0.864737	0.967433	0.932091
	140	0.852148	0.778958	2.55055	3.69392	0.916784	0.732594	1.16446	2.47458	1.45646	0.869366	0.908422	0.715991	0.930355	0.70161	0.433802	0.885044	1.01772	1.1239	0.569784		1.23077		1.02149	0.710195		2.73206	0.740851	0.501708	1.33239		2.24998	3.47484	1.02848	0.743473	0.381733	0.733303	1.6258	1.09154	0.711134	0.834825
	150	0.79651	0.730183	2.196	2.99734	1.18767	0.765301	0.910919	1.86476	1.62464	0.746021	1.09595	0.686898	1.18085	0.589252	0.529067	0.71668	0.772937	1.10615			1.12167		0.963684	0.593682		3.15469	0.740136		1.31172		1.77142	1.27872	0.992038	0.829677	0.638202	0.927393	1.13013	0.870435	0.741079	0.906765
