# Supplementary material for: Microglia facilitate and stabilize the response to general anesthesia via modulating the neuronal network in a brain region-specific manner
Source: eLife. 2023 Dec 22;12:RP92252. doi: 10.7554/eLife.92252 (PMC10746144; doi:10.7554/eLife.92252)
Supplement: Figure 10—source data 2. [file elife-92252-fig10-data2.xlsx]

## Sheet: Figure 10E
	eEPSC PPR
	CD	PLX5622	Statistical test
	1.05573	1.04767	Unpaired t test
	0.976373	1.25596
	0.667527	0.821715
	0.81762	0.968289
	0.842608	0.905118
	1.10775	0.82759
	0.579065	0.757252
	0.895579	0.851681
	0.898149	0.805826
	0.81788	0.712267
	0.911011	0.745809
	0.842582	1.19146
	0.763729	1.11164
	0.760729	1.38238
	1.04672	0.929532
	0.603426	1.4626
	0.909071	0.774283
	0.748448	0.551929
	0.829135	1.0121
	0.890309	1.07939
	0.941063	0.888185
	0.943617	1.05341
	0.961246	1.25917
	0.930302	0.868306
		0.663075
		0.948042
		0.920225
		1.17142
		1.08866
		1.07683

## Sheet: Figure 10F
	eIPSC PPR
	CD	PLX5622	Statistical test
	0.571242	0.680859	Unpaired t test
	0.416381	1.00343
	0.787304	0.555197
	1.2982	0.962478
	1.13509	1.99695
	1.10562	0.443968
	0.647359	0.875626
	1.03792	1.01047
	1.18701	0.394576
	0.648897	1.84057
	1.40565	0.715633
	1.11318	1.68337
	0.865974	1.74129
	2.05572	1.08106
	1.91198	0.825802
	1.002	0.915039
	0.93958	1.0272
	1.30023	0.812831
	0.63836	1.37583
	1.14287	1.43546
	0.754574	0.429206
	1.44487	0.940839
	0.841068	0.975139
	1.16539	0.887022
	1.64173	0.765976
	0.958485	1.46239
	1.92561	1.20304
	1.39996	1.46929
	1.02037	0.931009
		0.902969
