# Supplementary material for: Microglia facilitate and stabilize the response to general anesthesia via modulating the neuronal network in a brain region-specific manner
Source: eLife. 2023 Dec 22;12:RP92252. doi: 10.7554/eLife.92252 (PMC10746144; doi:10.7554/eLife.92252)
Supplement: Figure 10—source data 3. [file elife-92252-fig10-data3.xlsx]

## Sheet: Figure 10H
	Stimulation current	eEPSC amplitude
		CD															PLX5622																		Statistical test
	50	49.6	137.8	138.1								14.625					82.3			61.1	87.6	35.8		89.4	55.8			88.3882	25.1798	121.735	52.3373		85.6408	44.8645	Two-Way ANOVA
	60	187.8	145.5	211.6	123.5		27.4			9.3		54.875	12.75			17.625	94.1	29.5		70.4	56.5	58		285.4	94.7		197.487	132.859	30.7352	171.147	113.682	50.824	127.434	77.9534
	70	193.4	211.6	246	175.5		48.6		13.4	53.8		143.875	12.375		85.625	18.125	89.5	45.9		71.5	49.9	160.6		383.9	142.5		218.703	161.611	39.6705	314.615	146.528	72.0361	205.612	117.384
	80	233.3	267.9	247.5	153.4		93.4	22.9	45.8	80.1	170.5	148.25	31.375	257.5	103.5	15.375	113.8	60		92.4	43.4	132		380.3	183.4		279.817	161.723	42.2346	326.909	168.436	143.202	219.583	151.155
	90	276.1	328.9	259.5	138.9	105.3	104	20.5	47	72.6	103.3	125.75	32.125	265.375	143.25	13.25	141.6	60.6		108.4	39.8	128.8		392.5	169.5		349.224	168.601	33.0994	272.58	189.714	132.456	265.156	159.933
	100	423.3	319.4	220.3	149.3	151.3	145.9	18.5	52.9	88.4	64.8	264.75	79.375	391.5	162.375	14.625	143.1	72	49.4	125	56	160.4	312.4	529.9	174	539.65	412.255	163.078	29.2525	302.725	202.037	117.485	269.344	173.225
	110	411.8	299.1	238.4	189.1	160.9	205.3	27.1	71.8	102.4	81.3	277.5	42	453.875	250.625	21.875	192.9	59.1	38.3	136.1	55.8	157.6	323	702.3	203.7	626.29	478.423	151.757	23.4208	323.173	230.874	132.471	279.556	185.156
	120	419	304.6	217.8	237.3	163.9	228	56.3	73.3	141.9	52	436.625	94.25	408	281.25	13.375	197.4	65	35.6	128.9	55.9	142.1	325.3	774.6	220.3	753.02	468.87	147.665	34.5759	344.134	245.489	140.994	323.45	205.116
	130	399.8		231.1	241.9	161	234.1	40.1	71.6	118.6	43.3	451	84.75	470.125	246.875	12.75	159.3	60.1	30		51.3	139.5	322.9	787.1	197.8	774.24	462.66	147.424	39.2204			129.646		221.908
	140				233.1	143.4	228.6	33.4	62.4	152.8	251.6	419.125	76.75	511.625	258.625	11	194	58.5	24			139	362	801.6	212.1	745.75	468.948	166.728	60.2094			134.906
	150				238	140.6	243.6	53.3	78.1	151.8	14.8		87.5	475	268.625	5.625		53.4	25				370			738.44	434.135					112.353
	Stimulation current	eIPSC amplitude
		CD															PLX5622																		Statistical test
	50	34.625	19	108.125								41.25					110.625			93.625	107.875	46.625		80.375	22.1905			44.2306	18.2195	19.1363	15.2203		35.1859	23.3592	Two-Way ANOVA
	60	213.625	50.375	161.125	235		30.125			90.375		100	39.375			21.625	106.25	59.75		97.125	78.125	78.125		215.125	21.6359		27.9046	28.6651	22.7107	27.588	9.77551	49.8319	29.9499	31.6493
	70	232.5	91.625	163.25	273.5		39.5		46	114.75		107.375	67.625		79.75	45	157.75	97		113	94.25	107.875		327.875	23.6963		23.2419	26.0977	20.9305	38.1404	17.6234	65.8849	48.0502	32.8422
	80	316.375	126.875	227.75	371.5		25.125	17.125	33.625	45.5	48	177.375	93.5	108.75	40.5	58.125	145.75	150		128.5	145.75	75.75		454.625	23.5145		27.2298	29.0019	28.1865	41.119	12.0197	63.1754	57.5069	40.2268
	90	244.75	85.75	370.375	375.875	6.75	39.625	49.875	31.625	37.25	37.75	251.125	100.25	105.125	23.5	32.25	105.25	215.75		131.5	156.375	220.875		884.625	28.524		29.2272	35.3254	26.6309	59.93	15.2531	62.8991	46.3579	40.5177
	100	237.875	78.625	451.25	921.5	15	45.625	60.25	41.375	36.625	32.5	225.75	106.75	88.875	46.75	23.375	139.625	189	37.25	152	138	164.875	21.8	1452.38	30.3701	533.668	36.9134	43.7074	37.734	59.2285	9.37055	72.9	61.0136	40.9145
	110	205.25	160.125	527.375	393.125	36.125	33.375	37.125	45.875	101.375	26.25	285.875	124.75	73.625	48	45.125	164.125	213.125	20.75	162.375	129.75	93.375	34.6	1315.12	30.9779	623.782	22.9304	61.2323	34.7787	64.2702	19.1163	93.4344	66.1542	53.2683
	120	241	114.5	513.875	439.875	22.875	34	92	25.75	139.25	26.75	303.75	93.25	55.625	58.375	39.5	152.125	257.875	28	173.125	126.25	75.625	36.9	1054.75	39.2608	665.417	20.9136	100.775	35.8671	71.57	13.5557	98.2966	75.2413	60.2598
	130	221.5		499.75	434.25	37.125	71.125	97	27.75	137	29.375	271.625	88	69.75	67.875	37.375	174.875	253	16.375		128	62.875	31.6	1403.25	39.0385	681.694	22.0941	59.918	41.6326			100.73		65.6296
	140				402.375	21.875	64.5	87.625	38	68.625	15	224.375	39.875	77.125	40	27.125	131.375	195.125	13.625			71.375	62	1155.5	43.465	691.323	32.1306	80.9217	35.2044			97.8061
	150				400.125	15.625	64.375	148.125	27.375	101.5	14.5		61.375	46.125	64.625	12.5		298	13.5				27.5			673.262	21.1012					107.688

## Sheet: Figure 10I
	Stimulation current	E/I ratio
		CD															PLX5622																		Statistical test
	50	1.43249	7.25263	1.27723								0.354545					0.743955			0.652603	0.812051	0.767828		1.11229	2.51459			1.99835	1.38203	6.36147	3.43864		2.43395	1.92063	Two-Way ANOVA
	60	0.879111	2.88834	1.31327	0.525532		0.909544			0.102905		0.54875	0.32381			0.815029	0.885647	0.493724		0.724839	0.7232	0.7424		1.32667	4.37698		7.0772	4.63486	1.35334	6.20368	11.6293	1.01991	4.25492	2.46304
	70	0.831828	2.30941	1.50689	0.641682		1.23038		0.291304	0.468845		1.33993	0.182994		1.07367	0.402778	0.567353	0.473196		0.632743	0.529443	1.48876		1.17087	6.01359		9.40985	6.19255	1.89535	8.24887	8.31438	1.09336	4.27911	3.57419
	80	0.737416	2.11153	1.08672	0.412921		3.71741	1.33723	1.36208	1.76044	3.55208	0.8358	0.335562	2.36782	2.55556	0.264516	0.780789	0.4		0.719066	0.29777	1.74257		0.836514	7.79944		10.2761	5.57629	1.4984	7.95031	14.0133	2.26673	3.81838	3.75757
	90	1.12809	3.83557	0.700641	0.369538	15.6	2.62461	0.411028	1.48617	1.94899	2.73642	0.500747	0.320449	2.52438	6.09574	0.410853	1.34537	0.280881		0.824335	0.254516	0.583135		0.443691	5.94236		11.9486	4.77281	1.24289	4.54831	12.4378	2.10586	5.71977	3.94723
	100	1.77951	4.06232	0.488199	0.162018	10.0867	3.19781	0.307054	1.27855	2.41365	1.99385	1.17276	0.74356	4.40506	3.47326	0.625668	1.02489	0.380952	1.32617	0.822368	0.405797	0.972858	14.3303	0.364851	5.72931	1.01121	11.1682	3.73112	0.77523	5.11115	21.5608	1.61159	4.41449	4.23382
	110	2.00633	1.86792	0.45205	0.481017	4.45398	6.15131	0.729966	1.56512	1.01011	3.09714	0.970704	0.336673	6.16469	5.22135	0.484765	1.17532	0.277302	1.84578	0.838183	0.430058	1.68782	9.33526	0.534018	6.57565	1.00402	20.8642	2.47837	0.673424	5.02836	12.0774	1.41779	4.22583	3.47592
	120	1.73859	2.66026	0.423838	0.539471	7.16503	6.70588	0.611957	2.8466	1.01903	1.94393	1.43745	1.01072	7.33483	4.81799	0.338608	1.29762	0.25206	1.27143	0.744549	0.442772	1.87901	8.81572	0.734392	5.61119	1.13165	22.4193	1.4653	0.964001	4.80835	18.1096	1.43437	4.29884	3.40385
	130	1.80497		0.462431	0.557052	4.3367	3.29139	0.413402	2.58018	0.865693	1.47404	1.66038	0.963068	6.74014	3.6372	0.341137	0.910936	0.237549	1.83206		0.400781	2.21869	10.2184	0.560912	5.0668	1.13576	20.9404	2.46042	0.942059			1.28706		3.38122
	140				0.57931	6.55543	3.54419	0.38117	1.64211	2.22659	16.7733	1.86797	1.92476	6.63371	6.46563	0.40553	1.47669	0.299808	1.76147			1.94746	5.83871	0.693726	4.87979	1.07873	14.5951	2.06036	1.71028			1.37932
	150				0.594814	8.9984	3.78408	0.359831	2.85297	1.49557	1.02069		1.42566	10.2981	4.15667	0.45		0.179195	1.85185				13.4545			1.09681	20.574					1.04332
