# Supplementary material for: Microglia facilitate and stabilize the response to general anesthesia via modulating the neuronal network in a brain region-specific manner
Source: eLife. 2023 Dec 22;12:RP92252. doi: 10.7554/eLife.92252 (PMC10746144; doi:10.7554/eLife.92252)
Supplement: Figure 10—source data 4. [file elife-92252-fig10-data4.xlsx]

## Sheet: Figure 10J
	eEPSC PPR
	CD	PLX5622	Statistical test
	0.947115	1.13143	Unpaired t test
	0.899522	1.11851
	0.743041	0.920424
	1.07759	0.909091
	0.868421	0.980952
	0.960784	0.594595
	0.964286	1.10364
	1.21875	1.15961
	0.884058	0.892857
	1.11392	0.972093
	1.09829	0.930233
	0.777778	0.794118
	1.12766	1.43518
	0.918919	1.61194
		0.464373
		1.23077

## Sheet: Figure 10K
	eIPSC PPR
	CD	PLX5622	Statistical test
	1.10309	0.596078	Unpaired t test
	1.25	1.81356
	1.25806	1.2526
	1.34466	1.25
	1.52632	1.01219
	1.47619	2.7551
	2.33333	1.27801
	1.58333	1.08861
	0.434783	1.17172
	1.33333	0.929348
	1.12121	1
	1.69231	1.26087
	2.75758	0.921569
		1.21818
