# Supplementary material for: Microglia facilitate and stabilize the response to general anesthesia via modulating the neuronal network in a brain region-specific manner
Source: eLife. 2023 Dec 22;12:RP92252. doi: 10.7554/eLife.92252 (PMC10746144; doi:10.7554/eLife.92252)
Supplement: Figure 11—source data 1. [file elife-92252-fig11-data1.xlsx]

## Sheet: Figure 11B
	Spine number per μm (apical dendrite)				Spine subtype propotion (apical dendrite)
	CD	PLX5622	Statistical test		Stubby			Mushroom			Thin			Filopodia
	1.4	1	Unpaired t test		CD	PLX5622	Statistical test	CD	PLX5622	Statistical test	CD	PLX5622	Statistical test	CD	PLX5622	Statistical test
	0.85	0.98			8.99	8.15	Unpaired t test	41.57	55.16	Unpaired t test	37.08	33.15	Unpaired t test	12.36	3.53	Unpaired t test
	0.67	1.9			10.22	6.5		35.04	48		37.96	44		16.79	1.5
	0.9	0.56			8.97	3.06		47.44	59.18		35.9	33.67		7.69	4.08
	0.86	0.53			10.09	28		45.87	48		33.94	20		10.09	4
	1.53	1.9			10.38	16.67		40.44	57.47		42.08	25.86		7.1	0
	1.52	0.56			7.25	3.06		49.28	59.18		40.58	33.67		2.9	4.08
	1.2	0.53			10.45	28		47.76	48		39.55	20		2.24	4
	1.28	0.9			9.9	16.67		50.5	57.47		37.62	25.86		1.98	0
	1.02	0.73			7.32	14.89		35.12	56.74		47.8	42.55		9.76	0.71
	1.52	0.69			13.45	16.36		42.86	52.27		36.97	47.27		6.72	0.45
	1.58	1.08			8.26	18.71		41.28	45.81		45.87	50.97		4.59	3.23
	0.99	0.82			5.56	6.38		43.43	45.74		47.47	53.72		3.54	0.53
	1.38				0	13.64		34.21	48.48		63.16	51.52		2.63	0
	1.35				2.04			46.94			46.94			4.08
	1				16.41			39.31			43.51			0.76
	0.77				30			50.63			19.38			0
	0.97				19.26			54.81			25.93			0
					12.44			39.3			47.76			0.5
	Spine number per μm (basal dendrite)				Spine subtype propotion (basal dendrite)
	CD	PLX5622	Statistical test		Stubby			Mushroom			Thin			Filopodia
	1.1027	1.6708	Unpaired t test		CD	PLX5622	Statistical test	CD	PLX5622	Statistical test	CD	PLX5622	Statistical test	CD	PLX5622	Statistical test
	1.3637	1.5315			11.3971	11.5789	Unpaired t test	37.5	44.2105	Unpaired t test	42.2794	43.1579	Unpaired t test	8.8235	1.0526	Unpaired t test
	0.8124	1.3051			7.8125	9.7561		42.7083	45.122		39.5833	45.122		9.8958	0
	0.9971	1.0873			11.1111	4.3038		37.7778	53.9241		37.7778	40.7595		13.3333	1.0127
	1.0919	1.0789			15.7895	14.1732		38.5965	59.8425		43.8596	23.622		1.7544	2.3622
	0.8178	1.3467			15.2542	8.1301		47.4576	53.6585		28.8136	36.5854		8.4746	1.626
	1.2275	1.0459			15.9091	10.7937		40.9091	43.8095		36.3636	44.127		6.8182	1.2698
	1.3219	1.1291			8.4034	16.0256		42.8571	44.2308		41.1765	37.8205		7.563	1.9231
	1.7934	1.0303			9.4183	9.3548		38.5042	47.7419		45.1524	40.9677		6.9252	1.9355
	0.9773	0.8698			9.2025	7.4074		41.1043	53.7037		46.0123	37.037		3.681	1.8519
	1.0612	1.3737			6.1224	2.7397		45.9184	47.9452		41.3265	45.2055		6.6327	4.1096
	0.8303	1.0484			11.1111	4.6154		34.3434	53.8462		46.4646	38.4615		8.0808	3.0769
	1.0464	1.0272			7.3171	10		36.5854	56.5		48.7805	31		7.3171	2.5
	1.4427	1.1589			7.8125	11.5183		45.3125	55.4974		40.625	32.4607		6.25	0.5236
	1.338	1.128			6.4257	6.2837		45.3815	51.8851		44.9799	40.2154		3.2129	1.6158
	1.1544	0.7501			6.7599	13.6667		45.6876	40		46.62	45.3333		0.9324	1
	1.1288	0.347			5.3571	31.2849		49.7449	40.2235		44.3878	27.933		0.5102	0.5587
	1.3092	0.9649			8.0863	17.6471		47.4394	47.0588		44.2049	35.2941		0.2695	0
	1.4128	0.9641			6.4103	12.2302		43.5897	38.8489		48.7179	48.9209		1.2821	0
	1.4286				4.8426	29.2453		38.7409	38.6792		55.9322	30.1887		0.4843	1.8868
	0.949				12.6761			26.0563			59.8592			1.4085
	0.683				21.1921			43.0464			35.7616			0
	0.9703				13.1429			33.7143			53.1429			0
	1.2422				15.0289			52.6012			32.3699			0
					38.2759			14.4828			46.5517			0.6897
