# Supplementary material for: Microglia facilitate and stabilize the response to general anesthesia via modulating the neuronal network in a brain region-specific manner
Source: eLife. 2023 Dec 22;12:RP92252. doi: 10.7554/eLife.92252 (PMC10746144; doi:10.7554/eLife.92252)
Supplement: Figure 11—source data 2. [file elife-92252-fig11-data2.xlsx]

## Sheet: Figure 11D
	Pentobarbital LORR				Pentobarbital RORR				Propofol LORR				Propofol RORR				Ketamine LORR				Ketamine RORR
	WT	C1qa-/-	Statistical test		WT	C1qa-/-	Statistical test		WT	C1qa-/-	Statistical test		WT	C1qa-/-	Statistical test		WT	C1qa-/-	Statistical test		WT	C1qa-/-	Statistical test
	95	130	Unpaired t test		74	72	Unpaired t test		100	180	Unpaired t test		55	0	Unpaired t test		92	125	Unpaired t test		15	7	Unpaired t test
	97	115			147	89			93	96			70	49			89	116			26	22
	133	105			70	160			80	80			65	110			105	100			25	22
	132	115			70	110			90	180			die	0			109	85			26	28
	120	102			95	105			110	180			75	0			90	105			20	27
	120	160			77	48				105				90			102	100			24	29
		300				70				95				84			94	117			19	34
		125				95				115				81			75	80			29	21
		100				97				115				52			110				22
