# Supplementary material for: Microglia facilitate and stabilize the response to general anesthesia via modulating the neuronal network in a brain region-specific manner
Source: eLife. 2023 Dec 22;12:RP92252. doi: 10.7554/eLife.92252 (PMC10746144; doi:10.7554/eLife.92252)
Supplement: Figure 12—source data 1. [file elife-92252-fig12-data1.xlsx]

## Sheet: Figure 12B
	Mean soma area
	vehicle	2-Me-SAMP	Statistical test
	50.07	69.5575	Unpaired t test
	45.43	76.2734
	47.52	89.2656
	48.85	74.6126

## Sheet: Figure 12C
	LORR of pentobarbital				RORR of pentobarbital
	vehicle	2-Me-SAMP	Statistical test		vehicle	2-Me-SAMP	Statistical test
	110	110	Unpaired t test		110	110	Unpaired t test
	95	129			95	129
	120	135			120	135
	110	136			110	136
	120	120			120	120
	115	120			115	120
	108	131			108	131
	128	130			128	130
