# Supplementary material for: Microglia facilitate and stabilize the response to general anesthesia via modulating the neuronal network in a brain region-specific manner
Source: eLife. 2023 Dec 22;12:RP92252. doi: 10.7554/eLife.92252 (PMC10746144; doi:10.7554/eLife.92252)
Supplement: Figure 12—source data 2. [file elife-92252-fig12-data2.xlsx]

## Sheet: Figure 12E
	P2Y12 fluorescent intensity (Normalized to CX3CR1+/CreER)
	CX3CR1+/CreER	CX3CR1+/CreER::P2Y12fl/fl	Statistical test
	1	0.14855	Unpaired t test
	0.759507	0.110617
	1.17613	0.113844
	1.06437	0.068168
	0.88
	0.722094
	1.40268

## Sheet: Figure 12F
	LORR of pentobarbital				RORR of pentobarbital
	CX3CR1+/CreER	CX3CR1+/CreER::P2Y12fl/fl	Statistical test		CX3CR1+/CreER	CX3CR1+/CreER::P2Y12fl/fl	Statistical test
	113	140	Unpaired t test		85	63	Unpaired t test
	115	135			172	73
	116	140			122	107
	124	125			110	102
	140	148			134	107
	158	135			143	126
	128	165			120	108
	142	158			137	115
	145	135			104	137
	138	145			136	97
	134	140			117	94
	130	123			75	90
	115	145			85	75
	110	126			92	73
		130				70
