# Supplementary material for: Microglia facilitate and stabilize the response to general anesthesia via modulating the neuronal network in a brain region-specific manner
Source: eLife. 2023 Dec 22;12:RP92252. doi: 10.7554/eLife.92252 (PMC10746144; doi:10.7554/eLife.92252)
Supplement: Figure 12—source data 3. [file elife-92252-fig12-data3.xlsx]

## Sheet: Figure 12H
	P2Y12 fluorescent intensity (Normalized to TMEM119CreER/CreER)
	TMEM119CreER/CreER	TMEM119CreER/CreER::P2Y12fl/fl	Statistical test
	0.910637	0.324165	Unpaired t test
	0.655571	0.364185
	1.43379	0.340144
	1.23813
	0.761865

## Sheet: Figure 12I
	LORR of pentobarbital				RORR of pentobarbital
	TMEM119CreER/CreER	TMEM119CreER/CreER::P2Y12fl/fl	Statistical test		TMEM119CreER/CreER	TMEM119CreER/CreER::P2Y12fl/fl	Statistical test
	112	122	Unpaired t test		137	88	Unpaired t test
	96	87			120	88
	122	120			63	82
	110	115			65	75
	145	180			81	83
	128	114			90	53
	100	135			163	75
	118	120			115	74
	120	130			129	74
		129				84
		105				80
