# Supplementary material for: Microglia facilitate and stabilize the response to general anesthesia via modulating the neuronal network in a brain region-specific manner
Source: eLife. 2023 Dec 22;12:RP92252. doi: 10.7554/eLife.92252 (PMC10746144; doi:10.7554/eLife.92252)
Supplement: Figure 13—source data 1. [file elife-92252-fig13-data1.xlsx]

## Sheet: Figure 13B
	P2Y12+IBA1+ cells over IBA1+ cells (%)
	Ctrl	Mr BMT	Statistical test
	100	0	Unpaired t test
	100	0
	100	0
	100	0
	100	0
	100	0
