# Supplementary material for: Microglia facilitate and stabilize the response to general anesthesia via modulating the neuronal network in a brain region-specific manner
Source: eLife. 2023 Dec 22;12:RP92252. doi: 10.7554/eLife.92252 (PMC10746144; doi:10.7554/eLife.92252)
Supplement: Figure 13—source data 2. [file elife-92252-fig13-data2.xlsx]

## Sheet: Figure 13C
	LORR of pentobarbital				RORR of pentobarbital
	Ctrl	Mr BMT	Statistical test		Ctrl	Mr BMT	Statistical test
	160	155	Unpaired t test		60	80	Unpaired t test
	165	245			60	45
	150	255			76	66
	145	150			78	45
	138	160			75	58
	148	275			60	38
		190				35
		155				47
		145				47
		145				50
		235				30
		200				25
