# Supplementary material for: Microglia facilitate and stabilize the response to general anesthesia via modulating the neuronal network in a brain region-specific manner
Source: eLife. 2023 Dec 22;12:RP92252. doi: 10.7554/eLife.92252 (PMC10746144; doi:10.7554/eLife.92252)
Supplement: Figure 14—source data 1. [file elife-92252-fig14-data1.xlsx]

## Sheet: Figure 14B
	YFP+IBA1+ cells over IBA1+ cells (%)
	Vehicle	TAM	Statistical test
	0	91.6667	Unpaired t test
	0	100
	0	90.4762
	0	85.1852
	0	85
		98.4375

## Sheet: Figure 14C
	LORR of pentobarbital				RORR of pentobarbital
	CX3CR1+/CreER+tamoxifen	CX3CR1+/CreER::hM3Dq-YFP+/-+tamoxifen	Statistical test		CX3CR1+/CreER+tamoxifen	CX3CR1+/CreER::hM3Dq-YFP+/-+tamoxifen	Statistical test
	102	100	Unpaired t test		90	169	Unpaired t test
	122	98			88	85
	105	98			88	118
	125	130			104	134
	145	123			98	110
	180	118			105	120
	150	118			130	145
	128	158			121	90
	135	121			110	180
	140	150			114	130
	140	105			64	125
	120	98			83
	120	100
		100
