# Supplementary material for: Microglia facilitate and stabilize the response to general anesthesia via modulating the neuronal network in a brain region-specific manner
Source: eLife. 2023 Dec 22;12:RP92252. doi: 10.7554/eLife.92252 (PMC10746144; doi:10.7554/eLife.92252)
Supplement: Figure 14—source data 2. [file elife-92252-fig14-data2.xlsx]

## Sheet: Figure 14E
	Normalized Stim1 expression in the brain
	CX3CR1+/CreER	CX3CR1+/CreER::STIM1fl/fl	Statistical test
	0.933411	0.270522	Unpaired t test
	0.970631	0.567758
	0.901166	0.186725
	1.19481	0.6
	1.2	0.6
	0.8

## Sheet: Figure 14F
	LORR of pentobarbital				RORR of pentobarbital
	CX3CR1+/CreER	CX3CR1+/CreER::STIM1fl/fl	Statistical test		CX3CR1+/CreER	CX3CR1+/CreER::STIM1fl/fl	Statistical test
	138	155	Unpaired t test		92	70	Unpaired t test
	120	298			93	33
	186	178			50	39
	158	180			46	24
	150	207			48	25
	110				60
	139				60
